# Supplementary material for: Identification of phenotypically, functionally, and anatomically distinct stromal niche populations in human bone marrow based on single-cell RNA sequencing
Source: eLife journal article supplement (doi:10.7554/elife.81656), 2023-03-06
Supplement: supp [file elife-81656-supp-v1.zip]

Archive with 29 entries (29 files):
- elife_poa_e81656_Supplementary_file_1.docx
- elife_poa_e81656_Supplementary_file_2.docx
- elife_poa_e81656_Supplementary_file_3.xlsx
- elife_poa_e81656_Supplementary_file_4.xlsx
- elife_poa_e81656_Supplementary_file_5.xlsx
- elife_poa_e81656_Supplementary_file_6.xlsx
- elife_poa_e81656_Supplementary_file_7.docx
- elife_poa_e81656_Figure_1_figure_supplement_1.pdf
- elife_poa_e81656_Figure_2_figure_supplement_1.pdf
- elife_poa_e81656_Figure_3_figure_supplement_1.pdf
- elife_poa_e81656_Figure_4_figure_supplement_1.pdf
- elife_poa_e81656_Figure_4_figure_supplement_2.pdf
- elife_poa_e81656_Figure_4_figure_supplement_3.pdf
- elife_poa_e81656_Figure_4_figure_supplement_4.pdf
- elife_poa_e81656_Figure_4_figure_supplement_5.pdf
- elife_poa_e81656_Figure_4_figure_supplement_6.pdf
- elife_poa_e81656_Figure_4_figure_supplement_7.pdf
- elife_poa_e81656_Figure_4_figure_supplement_8.pdf
- elife_poa_e81656_Figure_4_figure_supplement_9.pdf
- elife_poa_e81656_Figure_4_figure_supplement_10.pdf
- elife_poa_e81656_Figure_4_figure_supplement_11.pdf
- elife_poa_e81656_Figure_4_figure_supplement_12.pdf
- elife_poa_e81656_Figure_4_figure_supplement_3.pdf
- elife_poa_e81656_Figure_4_figure_supplement_14.pdf
- elife_poa_e81656_Figure_4_figure_supplement_15.pdf
- elife_poa_e81656_Figure_4_figure_supplement_16.pdf
- elife_poa_e81656_Figure_5_figure_supplement_1.pdf
- elife_poa_e81656_Figure_5_figure_supplement_2.pdf
- elife_poa_e81656_Figure_5_figure_supplement_3.pdf
