# Supplementary material for: Identification of phenotypically, functionally, and anatomically distinct stromal niche populations in human bone marrow based on single-cell RNA sequencing
Source: eLife journal article supplement (doi:10.7554/elife.81656), 2023-03-06
Supplement: supp [file elife-81656-supp-v1.zip › elife_poa_e81656_Supplementary_file_1.docx]

Supplementary File 1. Donor information

| Sample ID | Age | Gender | Cell population |
| --- | --- | --- | --- |
| BM_Y1 | 19 | F | CD45-CD235a- |
| BM_Y2 | 22 | M | CD45-CD235a- |
| BM_O1 | 52 | M | CD45-CD235a- |
| BM_O2 | 53 | F | CD45-CD235a- |
| CD271_Y3 | 21 | F | CD45-CD235a-CD271+ |
| CD271_Y4 | 25 | M | CD45-CD235a-CD271+ |
| CD271_Y5 | 32 | M | CD45-CD235a-CD271+ |
| CD271_O3 | 58 | F | CD45-CD235a-CD271+ |
| CD271_O4 | 61 | M | CD45-CD235a-CD271+ |
