# Supplementary material for: Identification of phenotypically, functionally, and anatomically distinct stromal niche populations in human bone marrow based on single-cell RNA sequencing
Source: eLife journal article supplement (doi:10.7554/elife.81656), 2023-03-06
Supplement: supp [file elife-81656-supp-v1.zip › elife_poa_e81656_Supplementary_file_4.xlsx]

## Sheet: 0_basal
names	scores	pvals	pvals_adj	logfoldchanges
GZMB	50.1294	0.0	0.0	6.6819334
CD74	45.19901	0.0	0.0	2.4356563
IRF7	43.596954	0.0	0.0	4.8696127
IRF8	43.58775	0.0	0.0	4.472885
PLAC8	43.31306	0.0	0.0	3.2711143
PLD4	42.51447	0.0	0.0	4.7272577
PPP1R14B	39.980633	0.0	0.0	3.4226313
CLIC3	39.324963	0.0	0.0	6.120361
ITM2C	39.14996	0.0	0.0	3.5459952
SEC61B	38.571712	0.0	0.0	2.3634145
BCL11A	38.470703	0.0	0.0	3.6739008
ALOX5AP	37.3496	2.57340350526462e-305	4.5611432627894336e-302	3.9008007
MZB1	37.331856	4.994739296414182e-305	8.17177769964871e-302	3.573916
C12orf75	36.85752	2.216248785434851e-297	3.366956815529561e-294	4.0823803
TAGLN2	35.526173	1.9390186017951453e-276	2.7493991094387297e-273	2.5784547
LILRA4	35.438152	4.415717265199784e-275	5.869868157095888e-272	5.9508653
NAPSB	34.87871	1.5633435909981882e-266	1.955926755114145e-263	4.0520267
NPC2	33.374996	3.16174938258734e-244	3.7359582010138964e-241	2.2274904
HLA-DRA	33.364536	4.483735905808863e-244	5.0191883674025636e-241	1.829293
IGKC	33.04016	2.153821882685267e-239	2.2904818811416474e-236	1.8883516
TCF4	32.262497	2.349831266510683e-228	2.379931486067415e-225	3.4703991
CCDC50	32.116234	2.616548319556288e-226	2.5296075549383043e-223	4.2689085
GPX1	31.784698	1.0534024613830255e-221	9.741224761371987e-219	1.8141073
FCER1G	31.701515	1.4807047121483113e-220	1.312212855111768e-217	2.1752481
CYBA	31.259516	1.6576563684489749e-214	1.41026773202165e-211	1.6005249
SPCS1	30.84834	5.896441875974051e-209	4.823516240772772e-206	2.196221
MYL12A	30.717766	3.296465600515463e-207	2.5967602539764217e-204	1.7666557
SERPINF1	29.725607	3.5849678023480203e-194	2.72316714957643e-191	2.780562
APP	28.74905	9.308437794917708e-182	6.826936671038094e-179	2.4596605
SSR4	28.540773	3.656583861992573e-179	2.5923960720240014e-176	1.6372663
SPIB	28.407671	1.6257769187145353e-177	1.1154402994883695e-174	5.031393
RNASE6	27.80766	3.504672300356167e-170	2.3294023486336037e-167	3.2578096
TPT1	27.68444	1.0748812109630008e-168	6.92777226544608e-166	0.86846274
RNASET2	27.410582	2.051357870772103e-165	1.2832450162779956e-162	2.397987
HLA-DPB1	27.351591	1.0338474636102878e-164	6.282543343864918e-162	1.7472095
ERP29	27.062098	2.7520251954303444e-161	1.6259117744891109e-158	1.8286144
CLEC4C	26.913431	1.529385362727652e-159	8.644926166797863e-157	6.063841
SCT	26.913065	1.544535212460947e-159	8.644926166797863e-157	4.4105306
VAMP8	26.50263	9.038708300154601e-155	4.806107170899705e-152	1.8064721
UCP2	25.9541	1.634520483074639e-148	8.27728956059869e-146	2.7771363
PARK7	25.662014	3.105044558325977e-145	1.535841690954307e-142	1.7647704
DNASE1L3	25.54927	5.594181457619662e-144	2.704151032320741e-141	6.111798
PPIB	25.32028	1.9102768183779942e-141	9.02881725557368e-139	1.3817894
SMPD3	25.255398	9.880518804583552e-141	4.5684511837975557e-138	6.0877023
GPR183	24.241632	8.102091387289015e-130	3.6664549301329803e-127	4.069799
HLA-DRB1	23.638092	1.5649446587658685e-123	6.934334989019012e-121	1.4052474
UGCG	23.52519	2.2533809732833392e-122	9.781053045053743e-120	3.5930095
MAPKAPK2	23.140354	1.8181417052017863e-118	7.582363907438587e-116	3.2630422
HERPUD1	22.858368	1.2065927716853281e-115	4.93519647326447e-113	1.8830746
SRP14	22.77938	7.3421201643636235e-115	2.946406675016036e-112	1.1276895
VEGFB	22.588924	5.568699972165206e-113	2.1534669037814865e-110	3.070291
TXN	22.23694	1.5090244023126542e-109	5.731328573712115e-107	1.5854343
SLC15A4	21.886278	3.51032450463727e-106	1.2872602049850017e-103	3.956669
HLA-DMA	21.539503	6.641567648177904e-103	2.3942288526965396e-100	1.7385579
TPM2	21.185457	1.3005443524466852e-99	4.6102129720314246e-97	2.8731406
CD37	21.14641	2.9776336933450504e-99	1.0382178856353424e-96	1.5671248
SELENOS	21.068684	1.541574760203808e-98	5.288347350770128e-96	2.0789957
COMMD6	20.67907	5.346131420855204e-95	1.8048709395264974e-92	1.408334
PTCRA	20.076984	1.173018016360726e-89	3.898268779683794e-87	5.651388
DERL3	19.902775	3.850200367369893e-88	1.2598447940552347e-85	3.5472157
CST3	19.429846	4.316515388200235e-84	1.3702681461437432e-81	1.0828296
GNAS	19.322172	3.49621925630819e-83	1.093545402388513e-80	1.046668
PTPRE	19.136898	1.2446291707666613e-81	3.72845321592058e-79	2.192129
HLA-DPA1	18.528309	1.220634957530253e-76	3.605789571070965e-74	1.0963609
CD164	18.337343	4.166658816030222e-75	1.2139817309335176e-72	1.7116288
TCL1A	18.064516	6.065155833846565e-73	1.697365781974771e-70	6.2330046
CNPY3	17.980124	2.788735859819561e-72	7.604310641346443e-70	1.8361723
MALAT1	17.824972	4.523187838387155e-71	1.2025460266832049e-68	1.0041261
NIBAN3	17.625444	1.571291599492191e-69	4.075585491414562e-67	4.3774424
CDK2AP2	17.581797	3.396371667128043e-69	8.59969392716028e-67	2.5622284
HLA-DQA1	17.413763	6.487580438816756e-68	1.623345274743454e-65	1.454651
FAU	17.062815	2.8069759818971415e-65	6.942043274298872e-63	0.6877449
JCHAIN	17.009499	6.983211794200976e-65	1.7071946166765578e-62	3.7841957
PAXX	16.7767	3.613685322923188e-63	8.734031037869691e-61	2.270569
NACA	16.635336	3.8658181022770144e-62	9.238436541273013e-60	0.77539814
AC010970.1	16.634386	3.927591152350323e-62	9.281770691037668e-60	0.87927437
DDX5	16.598131	7.189427793045621e-62	1.6803509860471132e-59	0.86003745
LILRB4	16.512266	2.9942411371027277e-61	6.922229863591078e-59	3.4692173
LINC00996	16.472095	5.821866739221582e-61	1.331454663188213e-58	6.869741
IRF4	16.438484	1.0142340423484632e-60	2.2948663666712197e-58	5.0822935
EEF1A1	16.351925	4.214575522145166e-60	9.435769134790056e-58	0.6813712
MYL6	16.350853	4.289400491599316e-60	9.503256151648526e-58	0.75583005
MS4A6A	16.288456	1.192002084697356e-59	2.61367962262145e-57	1.78319
PPM1K	16.12196	1.7884562312511245e-58	3.8422904628767845e-56	3.58563
HINT1	15.949594	2.8675674667558196e-57	5.97944043631662e-55	0.9110185
DHRS7	15.936454	3.5387362431701554e-57	7.307318558833596e-55	1.8463315
DDIT4	15.75585	6.261174367542793e-56	1.280470361762189e-53	2.0936425
SELPLG	15.688399	1.815756817965225e-55	3.6780315963145115e-53	2.8843076
JAML	15.639052	3.9455297464404695e-55	7.916742658211542e-53	2.1255584
AC004086.1	15.629762	4.565093059833604e-55	9.074295728000088e-53	0.7261171
C12orf57	15.593974	7.999760922899123e-55	1.5754343987883467e-52	1.2013941
OFD1	15.535527	1.994257089411161e-54	3.891362755475778e-52	3.269856
LTB	15.433637	9.723279038561337e-54	1.8800401988287372e-51	2.6591413
CXXC5	15.180238	4.780479081432519e-52	8.997876954246749e-50	2.4288518
UNC93B1	15.173188	5.322724946389746e-52	9.93061727059329e-50	2.6826859
DBI	14.995465	7.861015313873852e-51	1.405007854712462e-48	1.1861122
HSP90B1	14.900552	3.2687017096467105e-50	5.745621211774866e-48	0.77561086
CTSZ	14.77907	1.999076126812264e-49	3.4288992049330684e-47	1.2504251
CAPG	14.735037	3.839887781628966e-49	6.533645858197319e-47	1.5681922
HLA-DMB	14.625889	1.92047563649519e-48	3.2417933581441427e-46	2.1614041
C12orf45	14.534864	7.285797985231353e-48	1.2201703728179972e-45	2.6316752
ST6GALNAC4	14.4785795	1.6548216163238054e-47	2.7497188248117984e-45	3.2704318
B2M	14.441075	2.8535607414159054e-47	4.704835923191852e-45	0.5546416
RAC2	14.389174	6.05136242824188e-47	9.900494422021273e-45	1.426861
SAMHD1	14.355699	9.813202456248998e-47	1.593259565205801e-44	1.4257334
NUCB2	14.21965	6.919783445094494e-46	1.1149763188917785e-43	1.0351925
ZFAT	14.194877	9.85593028981694e-46	1.5643715024934067e-43	5.119828
TGFBI	14.135605	2.2915664589530905e-45	3.610320519664688e-43	2.435351
CCDC88A	14.056787	6.999292735072296e-45	1.094617332222446e-42	1.7622577
IGHM	14.032266	9.893982332253584e-45	1.5139216562928164e-42	2.1391685
AL357143.1	13.857773	1.1416209577958254e-43	1.7343668679542435e-41	6.6521225
LAMP5	13.809728	2.2267237736989177e-43	3.358878577503708e-41	5.672978
SELL	13.728015	6.899801471352297e-43	1.0334639260154367e-40	1.5642277
PCED1B-AS1	13.664683	1.6502006391435972e-42	2.4205598202720804e-40	2.8654995
CD4	13.640146	2.3109676945913787e-42	3.3665734175523312e-40	2.4870455
SEC61G	13.607101	3.633718524989261e-42	5.186950289127288e-40	1.1619009
CTSB	13.570202	6.015648111898415e-42	8.529787979464493e-40	1.4302077
ANKRD11	13.562105	6.718016628051347e-42	9.462615606756563e-40	1.3972496
PTMS	13.534662	9.763012817183771e-42	1.3661152605834318e-39	1.8135468
CXCR3	13.517054	1.2404463550439318e-41	1.7243825833613978e-39	6.084536
CBFA2T3	13.322833	1.7051143701370381e-40	2.3397469379641718e-38	3.1163177
LSP1	13.268082	3.545393029315734e-40	4.802991359268557e-38	1.0780911
PLP2	13.132442	2.1461953169798696e-39	2.889077733977522e-37	2.8622673
OST4	13.039184	7.323742853079025e-39	9.796772751077847e-37	0.8503561
HIGD1A	13.022763	9.082396250499616e-39	1.2073342865742271e-36	2.6983197
MYBL2	12.967964	1.8590298833696056e-38	2.4407226289745763e-36	3.8960588
CYTH4	12.937975	2.74778152107461e-38	3.585433446118766e-36	3.2006347
TYROBP	12.92028	3.458803150852631e-38	4.458502073665734e-36	0.72938806
AC119428.2	12.903765	4.2863539087928743e-38	5.4919554991635926e-36	5.9870915
STMN1	12.882951	5.614714828139171e-38	7.150860459861799e-36	0.9216364
ARPC3	12.838933	9.923221834589759e-38	1.2562916976183902e-35	0.7185659
Z93241.1	12.782569	2.051782687929866e-37	2.567021528798843e-35	2.221823
MYL12B	12.775557	2.2453676837585753e-37	2.7927909512199494e-35	0.8314077
GRAMD1B	12.736067	3.7271803553854104e-37	4.5822773976122714e-35	3.8417475
AC091180.3	12.723452	4.380737426378519e-37	5.354822087450845e-35	1.6933811
USF2	12.702081	5.757789628486452e-37	6.997853006187334e-35	1.9225013
GLIPR1	12.695952	6.226814718216347e-37	7.524893309189971e-35	1.6879861
CIB2	12.572247	3.000747743066812e-36	3.5261272788556923e-34	3.6479614
GAPT	12.406843	2.3992831025454125e-35	2.7733887123933903e-33	3.1294427
COBLL1	12.390273	2.95038326288337e-35	3.391983871257643e-33	3.5962687
TSPAN13	12.3781805	3.4303265627910916e-35	3.901583725347793e-33	4.0302773
FCHSD2	12.274646	1.239335644518688e-34	1.4020973310248924e-32	3.2151425
SRRM2	12.108892	9.476554882413112e-34	1.0608255041791813e-31	0.8086027
EEF1D	12.052953	1.8712470153897566e-33	2.0728933734544133e-31	0.64376634
COPE	11.980786	4.480550690695658e-33	4.912207868062162e-31	1.0235143
MEF2C	11.90794	1.0760248875660146e-32	1.1736396581354649e-30	1.5252098
HCST	11.897488	1.2196336262110337e-32	1.3234891630552285e-30	0.948158
GUK1	11.85315	2.0725024152818153e-32	2.2375661863263416e-30	1.0114847
OSTC	11.811798	3.3922952525598834e-32	3.6439761478129376e-30	1.0558405
SNX3	11.792768	4.253316929988993e-32	4.5459194866299446e-30	1.0716835
SMIM5	11.79011	4.389706534058274e-32	4.668233413644272e-30	5.4231606
YPEL5	11.785537	4.6346047558872763e-32	4.9041496792520636e-30	1.315716
SEC11C	11.648566	2.3335250157562043e-31	2.421060661469205e-29	1.8193705
GRN	11.543534	7.958675725606443e-31	8.177443188788572e-29	0.9634265
IDH3A	11.424592	3.1513099682510463e-30	3.1615665903175237e-28	3.0649698
YWHAZ	11.185155	4.8206299962679783e-29	4.703210063790075e-27	0.87122643
UBC	11.155233	6.751516521046279e-29	6.527182040278786e-27	0.53913057
RACK1	11.057364	2.0194392836467318e-28	1.9347501857604658e-26	0.5264205
BLNK	11.051072	2.1661284755502753e-28	2.0659814594833542e-26	3.3122518
CDKN2D	10.993576	4.103377614162159e-28	3.896193681947097e-26	1.5778813
EGLN3	10.766825	4.937385782232192e-27	4.6466043452343585e-25	5.6696596
ZNF706	10.73549	6.934998766622335e-27	6.497818888426892e-25	1.3394824
ELF1	10.72477	7.788079162500776e-27	7.265116478387237e-25	1.8082639
SSR3	10.702913	9.862768135707598e-27	9.16031508639148e-25	1.2295686
DUSP5	10.686289	1.179987715419595e-26	1.0911808138808422e-24	3.4623823
SPCS2	10.630901	2.1403406488246413e-26	1.970688539387502e-24	1.0061934
RABAC1	10.565788	4.293453680360381e-26	3.885849630961061e-24	0.9797224
LGMN	10.5651455	4.3229751128956156e-26	3.895989732041392e-24	2.778053
CD53	10.556876	4.721110329595951e-26	4.236847915619252e-24	1.3412571
ZDHHC17	10.496932	8.923341989095528e-26	7.974393309498856e-24	2.9054852
SERF2	10.491695	9.432045441257437e-26	8.393731150213575e-24	0.4201444
CORO1A	10.490862	9.515651483655192e-26	8.432849641910928e-24	0.8577332
SIVA1	10.456492	1.368273048387771e-25	1.2025536969487398e-23	1.1101297
FAM49B	10.453344	1.4144829409792489e-25	1.2380509329912611e-23	1.3985795
PYCARD	10.429307	1.8221323710551123e-25	1.58831694262177e-23	0.8649189
DBNL	10.410158	2.2285150503652157e-25	1.9346239431109295e-23	1.63018
CUEDC1	10.366627	3.517218972228255e-25	3.0409646471675917e-23	3.8779843
NGLY1	10.352935	4.0584975536174954e-25	3.494744310440911e-23	2.0786207
ARPC2	10.323307	5.5285545997821745e-25	4.7414043460793175e-23	0.5951993
B4GALT1	10.299579	7.077070485388875e-25	6.045068761194216e-23	1.7894732
EEF1B2	10.266725	9.952658710016551e-25	8.46732392413368e-23	0.5335793
PPIA	10.265107	1.0120867343321528e-24	8.576124602593849e-23	0.5373653
SEPTIN6	10.257528	1.0947272669706322e-24	9.239585016348563e-23	1.413457
FCER1A	10.143194	3.55289763034861e-24	2.963395282348415e-22	2.0227726
RASD1	10.141212	3.625696900853974e-24	3.0081280824174153e-22	1.4911392
FERMT3	10.140967	3.6348155398997404e-24	3.0081280824174153e-22	1.6823735
SINHCAF	10.12362	4.340562648900294e-24	3.578272363544975e-22	2.085619
AL021155.2	10.06087	8.226783602329692e-24	6.729825401459624e-22	2.1898687
SLC38A1	9.994592	1.609484447082418e-23	1.3016016998097318e-21	2.7939966
SUB1	9.7794075	1.3801563927876007e-22	1.1035543728646421e-20	0.6741228
CXCR4	9.763488	1.6150386918462137e-22	1.2865265144897798e-20	1.153699
MLEC	9.75301	1.790779778121686e-22	1.4211975783906768e-20	1.3539027
AC097375.1	9.707355	2.805223297038287e-22	2.218003505751202e-20	6.8403926
AC253572.2	9.675023	3.850035218533824e-22	3.0328295949257746e-20	1.9100378
AFF3	9.591457	8.684956530795783e-22	6.791188987260864e-20	2.837954
APRT	9.586741	9.09111560434029e-22	7.082744973945554e-20	0.82785285
BX571818.1	9.558194	1.1982903063774488e-21	9.200879612397819e-20	4.927771
HLA-DQB1	9.383624	6.374307580322476e-21	4.876803882225854e-19	1.2741152
SNRNP25	9.374049	6.980221267488085e-21	5.321230327534195e-19	1.8522513
SPCS3	9.290208	1.5398725811088885e-20	1.1696982117001768e-18	1.1040425
SEPTIN9	9.277223	1.739537849714181e-20	1.316663008027435e-18	1.5643508
TACC1	9.234814	2.587359909816399e-20	1.9376957014748236e-18	1.4243113
ERN1	9.19693	3.683221696331441e-20	2.7487172722552078e-18	3.055831
CANX	9.17819	4.383963756394281e-20	3.2602281515646843e-18	0.80504435
EDF1	9.126642	7.06567664204019e-20	5.236232630646439e-18	0.6492647
DAD1	9.1235075	7.27316639072865e-20	5.371283887653044e-18	0.87482584
GTF3A	9.087425	1.0141224950879789e-19	7.41215510241451e-18	0.91955125
RRBP1	9.07476	1.1392820521325563e-19	8.270098964780662e-18	1.8406463
SH3BGRL3	9.031147	1.698815187175159e-19	1.2289830005451856e-17	0.51837075
UBB	9.027115	1.7625751879518646e-19	1.2707868363575664e-17	0.50660574
IKZF1	9.012637	2.011603278206925e-19	1.4454320987899693e-17	1.4733727
H1-10	8.973624	2.8691479534030454e-19	2.054677031007723e-17	0.6061319
C19orf53	8.952034	3.489927443430545e-19	2.4908478790041696e-17	0.80329734
LRRC26	8.936465	4.0181718069170614e-19	2.8582774635892633e-17	5.265065
PLAAT3	8.902907	5.440271685087302e-19	3.793742244922027e-17	1.9566891
PSAP	8.8873005	6.261167619007065e-19	4.351920721851675e-17	0.5244066
RNASEK	8.876291	6.912664675198436e-19	4.789103093706695e-17	0.75098264
LAIR1	8.800116	1.3667584484741975e-18	9.377285625999261e-17	2.3482323
ASIP	8.794363	1.4386167103214128e-18	9.838565534349237e-17	6.2238398
NRDC	8.784141	1.575650269636719e-18	1.0741187687469031e-16	1.3565527
ERCC1	8.773722	1.7285565516951242e-18	1.1745900734186452e-16	1.6084808
OPN3	8.7656	1.8578368978558463e-18	1.2584182477864965e-16	2.9255524
TMEM109	8.727115	2.6125168366911393e-18	1.7639879555423443e-16	1.8810884
TRABD	8.722726	2.7158323064312217e-18	1.8279442191609386e-16	1.4805412
CHD9	8.699364	3.3375162954681745e-18	2.2392944507354133e-16	1.1637312
CIRBP	8.679563	3.972934093031289e-18	2.6572432460591977e-16	0.59020746
RGS2	8.671418	4.267700733112235e-18	2.8454459840929196e-16	1.3130319
ATP5F1E	8.658149	4.794855711498059e-18	3.1869308164953817e-16	0.45718914
SLC20A1	8.653211	5.007057149233879e-18	3.317604314861538e-16	2.4218574
ARF1	8.614786	7.007226532043335e-18	4.599898182408323e-16	0.7793406
SCAMP5	8.579022	9.568312976714202e-18	6.261798421591827e-16	5.7332335
PNISR	8.564706	1.083524097155934e-17	7.06916381055508e-16	0.8886038
CBX4	8.5455885	1.2788261172105595e-17	8.292485575290057e-16	1.8720316
TM9SF2	8.502187	1.860516559066563e-17	1.1991311119632342e-15	1.5232188
SEPTIN1	8.497514	1.9369398216172662e-17	1.244615500482708e-15	2.3607466
MANF	8.49551	1.9706497403461522e-17	1.2624623291392263e-15	1.4354858
TMEM141	8.461784	2.6331770592228483e-17	1.6818331192976207e-15	1.5382417
P2RY14	8.44702	2.9883252178346315e-17	1.9029547622193046e-15	3.9105346
TMIGD2	8.411838	4.036368803324034e-17	2.56267247993728e-15	3.5938425
TMED10	8.4102745	4.090521771804653e-17	2.589324629896225e-15	0.98226887
UBA52	8.376092	5.4714346571693914e-17	3.432800699803416e-15	0.42134994
NCF4	8.253213	1.5419206570294806e-16	9.617334444093847e-15	1.786631
FUT7	8.242572	1.685476270492887e-16	1.048198678278164e-14	3.868766
PACSIN1	8.230466	1.8648673584534558e-16	1.1496772129549725e-14	5.983087
ARPC5	8.214854	2.1242177889093297e-16	1.3057800044020965e-14	0.72482693
OAZ1	8.1776905	2.8933470430931303e-16	1.7734466357218383e-14	0.38036025
CPNE3	8.1677475	3.1420062649371073e-16	1.9203256106019347e-14	1.4064769
DDX17	8.156505	3.4485923644497347e-16	2.1016650716183783e-14	0.7631672
ANAPC16	8.135135	4.114817973542087e-16	2.5005160994076184e-14	1.1026416
SNRPN	8.090127	5.960278837372343e-16	3.6013968918202376e-14	1.6797626
DIPK2A	8.073623	6.82427630872056e-16	4.100156294072814e-14	2.1864712
HMGN1	7.9892836	1.3572499509708045e-15	8.131647663999449e-14	0.5489723
KRT5	7.862636	3.761322531451674e-15	2.2284002485082355e-13	7.010426
MARCHF2	7.82846	4.9388181434879126e-15	2.917881197051234e-13	2.3676548
DCK	7.8267674	5.005731629995872e-15	2.9492217739164043e-13	2.5706587
TRAM1	7.8119307	5.63184663238786e-15	3.3089432603386024e-13	0.818285
ANKRD12	7.805536	5.924924903652006e-15	3.471548974539243e-13	1.438717
ADA	7.800113	6.185166088625696e-15	3.614074108213734e-13	2.1001747
FEZ2	7.787271	6.847196791812731e-15	3.989945988083972e-13	1.6719377
TMA7	7.7769756	7.427899361577328e-15	4.316502500584377e-13	0.4664514
COX4I1	7.766028	8.098569291806418e-15	4.693418808376858e-13	0.39534447
SRPRA	7.7166014	1.1947237108640585e-14	6.905048534339039e-13	1.3413742
UVRAG	7.69574	1.4067745851927421e-14	8.108587710694969e-13	1.6808773
EPHB1	7.694943	1.4155753703697392e-14	8.137262851998374e-13	5.497116
MPEG1	7.6930776	1.4363727750402194e-14	8.234558639442163e-13	1.931659
TMED9	7.6585426	1.8805489952434185e-14	1.0694491064126276e-12	0.94260293
TMEM8B	7.613042	2.6771918853340724e-14	1.5143934630098508e-12	4.181287
MBP	7.5996046	2.970373457894269e-14	1.6713458485701904e-12	1.9862801
EIF4A3	7.595229	3.072485288696365e-14	1.7242398312739574e-12	1.3887495
CTSC	7.582784	3.382166119563332e-14	1.8930339788682236e-12	0.5978574
MIF4GD	7.5720615	3.673467143082947e-14	2.0506816972764094e-12	2.1541293
CORO1C	7.540237	4.691185138025661e-14	2.5983546015798903e-12	1.8303673
IL2RG	7.4935865	6.701658511869799e-14	3.692683287278723e-12	1.6877882
ANXA11	7.488316	6.976282606414477e-14	3.831343287696889e-12	1.2305089
PDPK1	7.488071	6.989332811257666e-14	3.831343287696889e-12	2.0019827
TMEM258	7.477864	7.5540402894732e-14	4.1302540595579815e-12	0.6190613
SHD	7.4643426	8.371664098056983e-14	4.565562146194204e-12	4.0307245
DYNLL1	7.453363	9.09904345563375e-14	4.936927430047812e-12	0.56373006
LMAN2	7.447159	9.537170641379124e-14	5.161477922938743e-12	0.9194367
EEF2	7.413746	1.2278088472650724e-13	6.594511710222431e-12	0.44824326
ARHGAP9	7.3852196	1.5220175946276092e-13	8.154103833787058e-12	1.9111702
OGT	7.3821645	1.5573685045625094e-13	8.322530332547743e-12	2.030803
PARP10	7.3663597	1.7535022899453831e-13	9.347177996202596e-12	2.396753
SARAF	7.3132124	2.608304823329001e-13	1.380000877795635e-11	0.58196366
PRXL2A	7.290404	3.0902707270440863e-13	1.6309421363151532e-11	2.9738786
CALM1	7.2888455	3.126222434933672e-13	1.645832301203076e-11	0.45048743
SF1	7.250101	4.1646125272940243e-13	2.1870899714325088e-11	0.6174675
TRAF4	7.242009	4.4208667605518437e-13	2.315946185472344e-11	4.307444
TSTD1	7.2366524	4.598956065000699e-13	2.4033217824692847e-11	1.3037933
PPP1R2	7.2125173	5.492691123744738e-13	2.8633344978168336e-11	1.3398378
VPS36	7.201236	5.966931539982428e-13	3.102950291537561e-11	1.7571348
N4BP2L2	7.1773276	7.10871024267716e-13	3.6876867841829394e-11	0.7194806
SCAF11	7.164465	7.80908096893163e-13	4.0411519009296066e-11	0.92440116
CD2AP	7.158125	8.178811607780574e-13	4.222212235094297e-11	2.9488268
CIAO2B	7.0742564	1.5025220596674217e-12	7.719116349532945e-11	0.9482462
JTB	7.057359	1.6969656566738657e-12	8.685791891876165e-11	0.76216495
DDX24	7.0251665	2.1381144130235183e-12	1.0879319485788807e-10	0.7921501
ATP6V0E1	6.9893045	2.7625222689218832e-12	1.389032769212755e-10	0.6167663
H3-3B	6.98318	2.8857251063104244e-12	1.447558662408406e-10	0.31331322
SULF2	6.970967	3.147698317134563e-12	1.5715585799796953e-10	1.9502773
C11orf58	6.9445353	3.7970831311092664e-12	1.88691965223278e-10	0.7720444
NBDY	6.9056044	4.999015387282474e-12	2.478416276739183e-10	1.355522
CCDC18-AS1	6.9040437	5.054276247456979e-12	2.4999860815619185e-10	1.6090763
RNF5	6.8799133	5.988905865901245e-12	2.941756093807242e-10	1.8176737
GGA2	6.8696427	6.43629526630368e-12	3.144263597232949e-10	2.4691885
ARID3A	6.869438	6.4455260162375554e-12	3.144263597232949e-10	2.6245103
CCDC69	6.8690996	6.460836563162576e-12	3.1443923950819783e-10	1.4886525
RUNX2	6.8664756	6.580734132071976e-12	3.188283240433687e-10	2.5173821
DNAJC7	6.86223	6.779384531194445e-12	3.277062036226697e-10	1.3261111
RTF2	6.8347692	8.21372562200856e-12	3.961399779013607e-10	1.1164849
UXT	6.8121924	9.612241410708875e-12	4.6254018679721054e-10	0.5949801
TMBIM6	6.8035893	1.0204416986624809e-11	4.899271893646119e-10	0.45625034
NCL	6.7885776	1.1324444162713185e-11	5.42476583100781e-10	0.48536557
P4HB	6.7847543	1.162842547305226e-11	5.557864750255023e-10	0.6644955
GPSM3	6.748738	1.491365822551748e-11	7.105947819899003e-10	0.8639711
SFT2D2	6.748538	1.493421729039849e-11	7.105947819899003e-10	2.2169352
SIDT1	6.7433333	1.5479329564633368e-11	7.348880814959533e-10	4.1568174
SUZ12P1	6.739308	1.591427221985583e-11	7.538544673588278e-10	1.4180555
SH3KBP1	6.705943	2.001099861576631e-11	9.458087323527415e-10	1.2380754
BRK1	6.699239	2.0950775083942755e-11	9.858452107530497e-10	0.70071244
SRSF5	6.669661	2.5639525525891566e-11	1.1990962570031147e-09	0.42928097
ATP5MG	6.6695905	2.5651831159735637e-11	1.1990962570031147e-09	0.37322363
DDAH2	6.567855	5.104526683597927e-11	2.3653197828637106e-09	1.13866
DAAM1	6.5459824	5.910551463010328e-11	2.7328591101471016e-09	2.0974326
SNORD3B-2	6.5265408	6.730595765561142e-11	3.105272046371365e-09	1.6429014
SP110	6.5190144	7.07707771542335e-11	3.2580598686004156e-09	1.2920501
CDYL	6.486524	8.783925074453091e-11	4.009126661127528e-09	2.4269779
DNAJC4	6.4807334	9.127783784731233e-11	4.155204963167221e-09	1.4638491
UBE2D2	6.4774327	9.329645741332214e-11	4.230964504741894e-09	0.8515469
KLF6	6.447359	1.1381583827391295e-10	5.150529923931606e-09	0.5668859
ODC1	6.440426	1.1913877944800688e-10	5.379963269808191e-09	0.99966824
RSRP1	6.4306073	1.2709510121156366e-10	5.727088363704973e-09	0.80405635
CHML	6.42456	1.3225154126628408e-10	5.946845731908237e-09	2.2164626
MGAT4A	6.4203415	1.359691441664276e-10	6.101113348683014e-09	2.3879025
CCS	6.419612	1.3662203804632963e-10	6.117503425699758e-09	1.2308606
TRIM22	6.405025	1.5034454473934143e-10	6.717811180800531e-09	1.1987818
CHCHD2	6.3888683	1.671176373180238e-10	7.451624796891085e-09	0.37876952
N4BP2L1	6.3797293	1.7740126215465317e-10	7.860723843265247e-09	2.0784736
PHACTR1	6.3542724	2.0941581569014037e-10	9.260010361566727e-09	2.8227167
SPNS3	6.345676	2.2145107767617064e-10	9.751641762100358e-09	2.1573184
FBXW5	6.3449693	2.2246975191208597e-10	9.776258581442472e-09	1.4437879
PARVB	6.330687	2.440722145833038e-10	1.0681423728338042e-08	1.5526141
SMC6	6.314753	2.705935678223903e-10	1.178396771596907e-08	2.384446
PARVG	6.314562	2.709276511875911e-10	1.178396771596907e-08	1.182894
SSR2	6.308626	2.8152357777833944e-10	1.2219846889321433e-08	0.54211485
STRBP	6.2833004	3.314594112893496e-10	1.4328882558360115e-08	2.259016
USP15	6.2725644	3.551497906044569e-10	1.5321867943947655e-08	0.7741281
CCDC186	6.220239	4.963976877414449e-10	2.1158081003151885e-08	3.0898614
PCMTD1	6.211202	5.2580780177137e-10	2.2366812271750537e-08	1.3737439
AC023590.1	6.1900635	6.013996233778835e-10	2.5379302757190884e-08	4.9910455
WDFY4	6.188585	6.070680655160378e-10	2.556778353556556e-08	3.376813
TMEM107	6.1773643	6.518047502502148e-10	2.739769808907474e-08	1.2313974
COX7A2L	6.150008	7.747897206292762e-10	3.2502963645096793e-08	0.7377928
PRKCB	6.113274	9.760756013338098e-10	4.076245180641301e-08	2.0833685
CDCA7L	6.113054	9.774249104927658e-10	4.076245180641301e-08	2.1651473
KCTD5	6.079618	1.2046912396696274e-09	5.004409761041662e-08	3.0151849
SEL1L3	6.0472684	1.4732217827165867e-09	6.060726130870228e-08	2.954485
RABGAP1L	6.03474	1.5921906026156171e-09	6.524913666094714e-08	1.6725013
ARMH1	6.02961	1.6435564657866115e-09	6.722462013618354e-08	1.2390096
SELENOF	6.028065	1.6593392786265422e-09	6.773989849732807e-08	0.7676128
PTPN2	6.0223246	1.7192956228376296e-09	7.005306245619453e-08	1.2452928
SCAMP2	6.0170565	1.7761709923344993e-09	7.222279269585484e-08	1.3516257
TP53I13	6.0082693	1.8751408947717306e-09	7.596642226838083e-08	1.7608645
LCP1	5.990986	2.085726603252655e-09	8.433710860186449e-08	0.43407696
DPP7	5.9771895	2.27019872800632e-09	9.144859232190609e-08	0.8169203
SLAMF7	5.97261	2.3348789401716015e-09	9.369913241228262e-08	3.4128973
EIF4G2	5.970095	2.37115511113874e-09	9.497570255896396e-08	0.54683477
ZEB2	5.915446	3.309777519858334e-09	1.3158066928947087e-07	0.5700563
SLC7A5	5.9091644	3.438472248867466e-09	1.3644191466634724e-07	2.9093115
NPC1	5.9005184	3.623615802165802e-09	1.435208277397848e-07	3.6292393
PDIA3	5.8701224	4.354738509349055e-09	1.7183846633644723e-07	0.48409063
EIF1	5.848234	4.968193121884662e-09	1.9568240649882385e-07	0.25444293
TATDN3	5.8419185	5.160303609343406e-09	2.0287337794292958e-07	2.5529587
IFNAR2	5.839933	5.222180477263504e-09	2.049272261456042e-07	1.6033587
BAG1	5.8127174	6.146672937888354e-09	2.3943880350906117e-07	1.0414469
PPP1R10	5.801997	6.552966874757777e-09	2.547989990113769e-07	0.939292
IL16	5.7947435	6.842568472411947e-09	2.646083433449631e-07	2.0516412
LUC7L3	5.7924786	6.935518415189474e-09	2.677160456854173e-07	0.7496616
DAB2	5.778882	7.519857148646723e-09	2.8922213687986824e-07	1.7332116
TBC1D4	5.7531476	8.759682375730309e-09	3.3448776382299453e-07	3.7838037
PPM1J	5.750247	8.911326546813171e-09	3.396684665307694e-07	5.224048
RNF130	5.749504	8.950566489966509e-09	3.4055384378371674e-07	0.7195726
ARHGAP27	5.7481456	9.022761305526919e-09	3.4268769679866436e-07	2.4112825
SERP1	5.7369323	9.640688104459208e-09	3.655040914326968e-07	0.48807123
GABARAPL2	5.728899	1.010844271196403e-08	3.8187649740810474e-07	0.6930413
MDFIC	5.725987	1.0283419578415645e-08	3.8779796278957863e-07	2.1781871
CCR2	5.723831	1.0414838715416667e-08	3.920587692711453e-07	3.846842
POLB	5.7055	1.1600189815911978e-08	4.3514010087236655e-07	2.2905078
AKAP13	5.6799364	1.3474492904782102e-08	5.027877010382641e-07	0.7591253
BST2	5.6779327	1.3633240704663043e-08	5.078203091899794e-07	0.48476493
CCNI	5.671551	1.4151023812658556e-08	5.2618553404097e-07	0.3927886
SMIM14	5.66634	1.458800198645307e-08	5.414872849037876e-07	2.3110812
RIPOR2	5.6622076	1.494378944672166e-08	5.537272782967299e-07	1.0279963
NCF1	5.618063	1.931100692495645e-08	7.105982807731812e-07	2.363327
AD000090.1	5.611895	2.001225942370673e-08	7.33863354625549e-07	0.37709755
FYTTD1	5.602599	2.111610530647647e-08	7.730093696444889e-07	1.7559621
SRSF7	5.6015067	2.1249676972807494e-08	7.765625077914821e-07	0.48505157
AC245014.3	5.575359	2.470202722750644e-08	8.996359881880727e-07	0.8335231
TTC3	5.5353103	3.106781009068805e-08	1.1256920831666851e-06	0.79963666
RBX1	5.5346856	3.117874449243623e-08	1.1277903343701124e-06	0.5956658
UFC1	5.5342426	3.125763982305607e-08	1.128724518500135e-06	0.6445021
GNA15	5.527972	3.2395298337695144e-08	1.1678230514312509e-06	1.7454811
RPA2	5.5127697	3.532299351832629e-08	1.2712093894099526e-06	1.4362326
NUDT1	5.506193	3.666761467940749e-08	1.3151492354406711e-06	0.84592915
PPM1G	5.5025244	3.74391571637518e-08	1.3383082919593898e-06	0.93771213
DCPS	5.499003	3.8194440008598297e-08	1.3630160143336865e-06	1.8381823
TCF25	5.455849	4.87393906929075e-08	1.7335085295107854e-06	0.53695214
PDE4B	5.4392037	5.3519160626560676e-08	1.900332266053955e-06	1.2792382
SKAP2	5.434758	5.4870805718036403e-08	1.945078611361527e-06	1.4104687
ACAP1	5.4284654	5.6840658444612494e-08	2.0115540174017692e-06	1.4226137
EPS8L2	5.420237	5.952002613148046e-08	2.0993887824054026e-06	4.4874053
SIT1	5.4127293	6.207138523083636e-08	2.1857554511169843e-06	5.15113
CBX6	5.381538	7.385212370211513e-08	2.5877443476446237e-06	1.3792963
HNRNPC	5.356099	8.503794671253092e-08	2.965036210866918e-06	0.41899016
SVIP	5.325878	1.0046658983710528e-07	3.4915423190284186e-06	1.8377352
PNOC	5.3181562	1.0482402605766367e-07	3.637034600685887e-06	4.5515757
MLF2	5.3068113	1.1155964199818163e-07	3.864433266546132e-06	0.96497726
TTC24	5.287129	1.2425118041856846e-07	4.297070498085419e-06	4.5855207
ADD1	5.2396855	1.6085037388380028e-07	5.535803563324512e-06	1.0547734
LITAF	5.2301807	1.693444783494508e-07	5.818720048488641e-06	0.97804135
SEPTIN2	5.222688	1.7634396263014648e-07	6.049451195452557e-06	0.6532236
TWF2	5.2147827	1.8403278559223014e-07	6.303048819261099e-06	1.1986834
ARHGAP4	5.2137356	1.8507532823301104e-07	6.3285645597876396e-06	1.3141007
EIF3F	5.197883	2.015706655139399e-07	6.859530375705579e-06	0.43585175
UBXN4	5.197495	2.0199221868130272e-07	6.862895366026561e-06	0.59802276
AC007952.4	5.1914997	2.0860699550308131e-07	7.065067177316937e-06	1.7600697
DNM2	5.1786485	2.2349928082890114e-07	7.557402549999838e-06	1.6095983
AL355987.4	5.1589704	2.48311411768722e-07	8.356543381185046e-06	2.8560824
PHYKPL	5.146894	2.648349994309831e-07	8.842661856982072e-06	2.006462
TRAPPC1	5.137455	2.784844052003117e-07	9.254820022195983e-06	0.67863566
LARS1	5.129674	2.9024425485121317e-07	9.630585111435964e-06	0.8653719
NCF1C	5.1145215	3.1453719967772865e-07	1.035586950455977e-05	2.0801399
MYDGF	5.102202	3.35724372044752e-07	1.1019323563302207e-05	0.58588403
CNP	5.096661	3.4569643163270243e-07	1.132914854298297e-05	1.5066043
SMDT1	5.088751	3.604297651371164e-07	1.1775699961138755e-05	0.61420643
LY9	5.0827036	3.7210036567285e-07	1.213834766487093e-05	3.8465114
CD52	5.062378	4.1405867331570103e-07	1.3465770524085085e-05	0.2938961
TRIR	5.0487475	4.447156116847825e-07	1.4440696709807082e-05	0.46078488
AP001453.2	5.0247874	5.03990031643739e-07	1.6241460580349524e-05	3.9972801
BAX	5.0228996	5.089710937572558e-07	1.6377165193832184e-05	0.7649715
PROC	5.018879	5.197393114534806e-07	1.6698391866018247e-05	4.878475
CDH23	5.0067205	5.53652594294366e-07	1.773439311452842e-05	3.1219974
PLEK	4.98625	6.15625712507894e-07	1.9630799519235976e-05	1.6298655
TAF15	4.9839892	6.22865211337054e-07	1.9831916437017667e-05	0.87055415
SCN9A	4.9788527	6.396223264858237e-07	2.033501832888936e-05	4.2700996
PNN	4.9692435	6.721464965498953e-07	2.1337140052417494e-05	0.64433026
BIN1	4.9603653	7.036068966988225e-07	2.2302556014735102e-05	1.8845233
RBM38	4.943968	7.654828484975704e-07	2.419176033387047e-05	1.3780563
PIN1	4.914276	8.911102466434686e-07	2.8120213406320378e-05	0.9107636
KLF13	4.9022655	9.473765507744496e-07	2.9851484234698918e-05	1.0074027
MARCHF9	4.8817563	1.0514519046656942e-06	3.308184994132345e-05	2.2023551
ADI1	4.8756113	1.084720977775323e-06	3.407818386455443e-05	1.3336341
CAT	4.8607244	1.1695698329741756e-06	3.663561233803791e-05	0.54619426
TNFRSF21	4.858664	1.1818053772143616e-06	3.696443907054744e-05	3.499388
CHAF1A	4.8440337	1.2722921868341236e-06	3.973624452536708e-05	2.3495302
SFT2D1	4.831119	1.3576781351294268e-06	4.2217041310040606e-05	1.051907
FAAP20	4.82718	1.3848008344277238e-06	4.2997560507216434e-05	0.8680525
MGST2	4.795316	1.6241834645271738e-06	5.021040422533206e-05	1.0444453
NOP56	4.791452	1.6557858216116664e-06	5.111307494899642e-05	0.81975865
NR3C1	4.7859864	1.7014970990009492e-06	5.24480315922481e-05	0.9638302
PSME1	4.761613	1.92052007698318e-06	5.894306135260499e-05	0.33177912
ATP13A2	4.7584934	1.950430938576575e-06	5.9688799471345586e-05	3.4783857
CDV3	4.755756	1.9770502134768218e-06	6.041649567591741e-05	0.5654851
SLC3A2	4.740924	2.1274583540268695e-06	6.482652110572706e-05	0.8017191
RASGEF1B	4.734243	2.1987450329521062e-06	6.690287282669291e-05	1.4161868
FLNB	4.717323	2.389684517445981e-06	7.250527817626044e-05	1.7803111
TNNI2	4.703202	2.5611334683626332e-06	7.726630884908489e-05	2.2919254
SNHG7	4.6668262	3.05887592982849e-06	9.215188690017302e-05	0.7149187
PAIP1	4.6531754	3.2686188517031163e-06	9.83313357240079e-05	1.1326929
SCARB2	4.631805	3.624912316013859e-06	0.0001087422567691097	1.0249563
NOP53	4.627473	3.701545958858173e-06	0.00011088476197035842	0.39815417
CLN8	4.6202035	3.833641283597156e-06	0.00011468033257500407	3.1050737
SNRPD2	4.6125293	3.977982800305692e-06	0.00011848781427153924	0.3158687
CUX1	4.604033	4.1438663861110436e-06	0.00012292314388590765	1.1720418
CSF2RB	4.6017365	4.189834056184545e-06	0.00012411362192338312	2.2842243
PRDX6	4.5904503	4.4229078199390226e-06	0.00013083564175560928	0.4216736
ATP5MD	4.5855684	4.527532088876289e-06	0.00013337407201981967	0.4171028
EIF4A2	4.58481	4.5440043055416105e-06	0.0001336741736854281	0.5564252
UBE2E3	4.57152	4.841994401799234e-06	0.00014224361730920984	0.9265049
EIF1AY	4.566842	4.951261834765573e-06	0.0001452529489153503	1.6534505
AC109326.1	4.565863	4.974431237647489e-06	0.00014573165012882154	1.8760848
IVD	4.565168	4.990943966075737e-06	0.00014601428777780585	1.4493095
CIAO2A	4.551658	5.322481309037519e-06	0.00015549980077186673	1.1153332
LSM10	4.549979	5.365123232231899e-06	0.00015631617263882228	1.0649545
FGD2	4.5316553	5.85233040362541e-06	0.00017004537616763503	1.881764
NADK	4.520406	6.172127383727057e-06	0.00017884874294889753	1.5457795
CCDC183	4.5154963	6.316864326146817e-06	0.00018229767619106738	5.149962
MEF2D	4.498706	6.836837644221052e-06	0.00019623846134269574	1.6127592
CIITA	4.4922247	7.048304585619831e-06	0.00020203556634979536	2.2850733
M6PR	4.4889054	7.159003096469864e-06	0.0002049324856780855	0.8363956
RHOA	4.486384	7.244216198923179e-06	0.0002070930569017434	0.33163115
GCC2	4.4705887	7.800467283622966e-06	0.00022239696870693948	0.78640026
RBM6	4.464793	8.014611334390345e-06	0.00022799539684436928	1.153107
SND1	4.4646955	8.018268693384184e-06	0.00022799539684436928	1.1550646
NUDT22	4.460445	8.178960454486422e-06	0.00023225408532239215	1.5963395
ARF5	4.4563923	8.335043768130554e-06	0.00023605598655708225	0.6035593
ST14	4.4488773	8.632027454801785e-06	0.00024381751917155269	3.1498463
BRD2	4.4344177	9.232146819722347e-06	0.00026042245452078864	0.698988
ITGAE	4.4332523	9.282212853927477e-06	0.0002614879274042166	0.9887785
PFDN2	4.415669	1.0069806739457257e-05	0.00028255240045054934	0.6170931
SAP30BP	4.4107122	1.0303124931584117e-05	0.0002883383739077139	1.1199981
DOCK2	4.405076	1.057468658948655e-05	0.0002955492891876339	1.0720794
SENP6	4.403715	1.0641268018825402e-05	0.0002970198549768996	0.9352829
PFN1	4.4027677	1.0687855497352436e-05	0.0002979292248665648	0.23087046
GGNBP2	4.399265	1.0861825928100915e-05	0.00030238242888059994	0.8323373
UBE2K	4.380198	1.1857153361274365e-05	0.0003288002540299146	0.8093988
SMARCB1	4.375584	1.2110775930900584e-05	0.00033539595478427676	0.9017083
TRMT112	4.3740687	1.2195191431737001e-05	0.00033729457290196916	0.48524222
INPP4A	4.3632507	1.2814392160640854e-05	0.00035396013878528617	2.925103
RNF149	4.3534117	1.3403502166879343e-05	0.0003693691503498268	1.1869951
STX7	4.353355	1.3406976541918581e-05	0.0003693691503498268	1.9136648
PI4KA	4.345899	1.3870628538031392e-05	0.000381648639554191	2.1565638
AL096865.1	4.342001	1.4119099056320107e-05	0.00038748273268241596	3.0153332
TMEM160	4.3341384	1.4633214211131276e-05	0.0004010745271347308	0.681167
ARID1B	4.3307285	1.4861687275709414e-05	0.0004057679418062433	1.0332696
CXorf21	4.3279796	1.5048338254670502e-05	0.00041033731581870115	2.4270377
ST3GAL4	4.315687	1.5910713797602055e-05	0.0004327429306409183	2.2373734
IQGAP2	4.31337	1.60784672959876e-05	0.00043674702543851894	1.2034712
CDC37	4.3071976	1.6533582422005886e-05	0.00044853668945617756	0.6044181
PDIA4	4.2975903	1.7266477909058173e-05	0.00046663369586754543	1.1185163
SYNRG	4.296132	1.7380409013468297e-05	0.00046911664886733145	1.3304647
PDCD4	4.2897415	1.7888111493883267e-05	0.00048159777640937115	0.7158434
NIN	4.2758384	1.904192066606985e-05	0.0005120134142182549	1.1907854
PTRHD1	4.270777	1.947930428198992e-05	0.0005224531182517573	0.82392013
AEBP1	4.2622237	2.0240244393171935e-05	0.0005421785365218814	1.5943804
LINC02132	4.254902	2.0914048208244668e-05	0.0005588202152527084	5.2175503
WDR1	4.2510695	2.1275195326747376e-05	0.0005677567495666122	0.918931
MYO1E	4.2497406	2.1401810623775133e-05	0.0005704199375401921	2.8468604
COPZ1	4.245554	2.180540930454952e-05	0.000580129506787587	0.80607843
SLC1A5	4.2332	2.3038930645733195e-05	0.000610230405858156	1.2353673
MIS18BP1	4.230976	2.3267939949042787e-05	0.0006155296203683968	0.6206556
R3HDM1	4.2227116	2.4138072495568734e-05	0.0006369636028638355	1.4510592
EIF2AK4	4.222155	2.419777057117673e-05	0.0006377476855989564	1.7176846
APPL1	4.206725	2.5909786548905653e-05	0.0006820238243919237	0.7850891
FTH1	4.1829944	2.8769427859780244e-05	0.0007507938173615535	0.22976483
PPP2R5C	4.175977	2.9670962002702242e-05	0.0007705393050494188	0.94750285
TMEM208	4.172758	3.0093442923948916e-05	0.0007805578506700847	0.8520835
TP53I11	4.170382	3.0408970785189155e-05	0.0007877812419368917	1.9993325
TSPAN3	4.1669583	3.086909272471831e-05	0.0007977578774751321	0.7345981
ARHGAP17	4.156336	3.233926478900404e-05	0.0008337258458149417	1.9752887
MCOLN2	4.1539936	3.267225211606999e-05	0.0008412907145964803	4.323825
AP1S2	4.15221	3.29279690276631e-05	0.0008468500281128979	0.35737875
PLEKHO1	4.1425915	3.4340319231403756e-05	0.0008799810237743694	0.7999155
CD300A	4.1418624	3.444971058360818e-05	0.0008817218945881616	1.5211424
DANCR	4.1313124	3.60698071771657e-05	0.0009203576831854134	1.0454304
TM9SF3	4.1086607	3.979601161434804e-05	0.001008845495858842	0.72267234
SMG1	4.09648	4.194802981638416e-05	0.0010596112187228916	1.2341605
CCDC57	4.0854573	4.3990115653261284e-05	0.0011085613386602065	1.5317507
TNRC6B	4.084726	4.412892180593701e-05	0.0011107432401070703	0.92834455
SUPT5H	4.0827765	4.450081530942028e-05	0.0011187799536832859	1.1813133
RGS1	4.0779104	4.544226574323522e-05	0.0011398766614597975	2.809459
TLK1	4.0778856	4.54471488512816e-05	0.0011398766614597975	1.0657748
SRGN	4.071336	4.6744267617195465e-05	0.0011682771186253	0.05430543
RGS19	4.070802	4.685153197742928e-05	0.0011695836075445345	0.8715024
PSMB8	4.06244	4.856246527263798e-05	0.0012094555900277952	0.42905536
UBE2L5	4.052946	5.057663309232824e-05	0.001256675711729824	0.652536
TMED2	4.040011	5.3448718043281044e-05	0.0013249426387675345	1.0341679
PEBP1	4.0334	5.497555411949102e-05	0.0013594097143725746	0.29500952
TBCC	4.033368	5.498299862042676e-05	0.0013594097143725746	1.5063851
CCDC12	4.010099	6.069334012862633e-05	0.0014906312369465974	0.719991
TMCO1	4.0042014	6.222734224001081e-05	0.0015265436471773818	0.60084444
OSBPL8	3.9989605	6.362130788856517e-05	0.0015589419325828255	0.56449085
SDF2L1	3.9940307	6.495942857330961e-05	0.0015898988335163661	0.61843246
RNASEH2B	3.9913864	6.568813676536818e-05	0.0016058861848995585	0.6816564
GNAI2	3.977999	6.949764661065145e-05	0.0016912419287894115	0.28128853
ABRACL	3.9692733	7.209216230379338e-05	0.0017483787913789982	0.61269486
CMTM3	3.9675717	7.260865675382121e-05	0.0017588992260786143	0.7726308
ITPR2	3.9623468	7.421665068134519e-05	0.0017937658447062849	1.6943902
AL357060.1	3.957451	7.57537822196259e-05	0.0018267655261102304	3.117008
IL18R1	3.9554315	7.63966236853003e-05	0.0018401809616791075	2.9903498
CDC14A	3.9539208	7.688085803659884e-05	0.0018497499655887113	2.1200678
HLA-C	3.9532347	7.710172289795281e-05	0.0018529678466853766	0.17690219
DGKZ	3.9317145	8.434218864086245e-05	0.0020224058739599813	1.0092243
GTF2A2	3.9241338	8.704238706545225e-05	0.0020824572896457863	0.58166856
RBM39	3.92116	8.81237282095072e-05	0.0021059590733573134	0.2584788
PFKFB2	3.918586	8.906991339391375e-05	0.0021261818046859164	3.6137938
AP3S1	3.909572	9.245986637206292e-05	0.0021972389920306215	0.9808522
COX7A2	3.9090242	9.266963472413162e-05	0.0021997661394503967	0.2975958
PRMT7	3.9054258	9.405958700405082e-05	0.0022277877015469453	2.244592
RAP1GDS1	3.8929858	9.901795088945708e-05	0.0023426171273279897	1.7004937
SSNA1	3.8807979	0.00010411433869163599	0.002446859524455697	0.6506858
CCNL1	3.866963	0.00011019916055513427	0.002578466387070573	0.23903313
TENT4A	3.8525782	0.00011688060236102142	0.002728796412312365	2.3051748
SEC61A1	3.8501635	0.00011803905159823134	0.002749805682850802	1.1013422
CRIP1	3.8489003	0.00011864928035249427	0.00276033358681773	1.4461219
LMAN1	3.8486912	0.00011875053984382071	0.00276033358681773	0.7089641
RNMT	3.8475258	0.00011931666724055395	0.002770465278973081	0.6006793
BEX4	3.8349018	0.00012561446623764782	0.0029103421376999255	1.1164863
MAP4K1	3.8199356	0.00013348654947644244	0.0030860058921896244	2.1460505
AC005224.2	3.8172777	0.00013493231948885222	0.00311604289164864	4.577025
LINC-PINT	3.8008893	0.00014417774520818333	0.003325939764460793	1.850575
MAP2K6	3.7986312	0.0001454974505595805	0.003352746777845848	1.8941423
SF3B5	3.7977974	0.0001459875747889268	0.0033604001387290954	0.41305086
FUS	3.7961957	0.00014693345890591134	0.0033785164729403547	0.41146308
RBIS	3.7851348	0.000153625357610047	0.0035285720637236386	0.43975574
MRPL36	3.7773108	0.00015853085863647807	0.0036294863641972573	1.1298859
PLEKHJ1	3.767992	0.0001645659169403606	0.0037636048251661605	0.79104203
RBM3	3.7598069	0.00017004449797454165	0.0038805541066743846	0.25997043
BRI3	3.7485118	0.00017788691968207096	0.004050831793059923	0.3502644
CUX2	3.7462673	0.00017948527960924877	0.004082858194662152	5.559204
FAM118A	3.7436981	0.0001813315552275936	0.004116052132482058	1.7061266
TRG-AS1	3.7346997	0.00018793934162351645	0.00425695618422851	2.1984763
AL008729.1	3.7298427	0.00019159937374419565	0.004332001290455991	1.9426743
TSPYL2	3.7297633	0.0001916598436371756	0.004332001290455991	1.7699548
AHI1	3.7293906	0.000191943427274381	0.004333805472079415	1.2977742
MILR1	3.717925	0.0002008658100730734	0.00452366759294463	2.6108828
NDUFB8	3.7166553	0.00020187766427618882	0.004538833024831141	0.421108
GLS	3.7155533	0.00020275944765668456	0.004553844447951451	1.0165492
TPP1	3.715015	0.0002031916545631572	0.004558737659181214	0.86772203
LPXN	3.7084336	0.00020854521762060378	0.004664088573683093	2.151402
TXNL4A	3.703313	0.00021280187253520773	0.004744321831185883	0.5587838
PTPMT1	3.7008734	0.0002148586865319615	0.004780156280176034	0.71876466
BLK	3.6916115	0.00022283770261132576	0.004947322648058756	4.348941
REPIN1	3.680991	0.00023232916090770183	0.0051526683246568405	1.2668681
EBLN3P	3.6801164	0.00023312748786559663	0.005164988061888932	1.1514623
GLG1	3.6745846	0.00023823657885994166	0.005261738105682346	0.8442261
HHIP-AS1	3.6722198	0.00024045269226801388	0.0053051745973530995	3.2136087
AKNA	3.6691575	0.000243351100186779	0.00535800678040642	1.4033421
CD320	3.6656158	0.00024674405408960646	0.005421486866148594	1.6539104
TOMM20	3.6605523	0.0002516723165394829	0.005524064499977567	0.76542675
PPP6R1	3.6595616	0.0002526470332283569	0.005539742010034972	1.1753979
UBTF	3.6574535	0.0002547334586723519	0.005579738344492536	0.9258272
RPN1	3.6549432	0.0002572389072454291	0.005628821315023695	0.803038
POP5	3.6399179	0.0002727249932056876	0.005943225287389108	0.92209876
NDUFA4	3.63278	0.000280383989579508	0.006097635045364576	0.24043947
AKAP9	3.627739	0.00028591399999279533	0.0062115473604154895	0.74251884
FRYL	3.6269963	0.0002867375093335611	0.0062230817204239905	1.3422863
VAV3	3.6223755	0.00029190999728152	0.006322437609145263	1.8702499
ADAM19	3.619345	0.0002953496985847635	0.006390430050050187	3.6444933
UBL7	3.6156626	0.00029958051900083984	0.006475384205923641	1.4279113
CDC42SE2	3.6097877	0.00030644767956372826	0.0066103810310760005	1.0910792
ANP32A	3.605051	0.00031209146494730143	0.006725302297836022	0.3750186
ACADVL	3.5925589	0.0003274467198354856	0.007027713707548884	0.54769987
NCOA7	3.5848327	0.00033729447000312743	0.007231770244452135	1.1841551
MOB1B	3.575723	0.000349261437141043	0.007465770358344567	1.9347275
ISG20	3.5691552	0.00035813410444843896	0.007647745248507879	1.0600927
SLC2A1	3.5680354	0.00035966803081151756	0.007672797740551822	2.738584
BANP	3.5625648	0.00036724899966165346	0.007826672318440588	1.7810082
GRK6	3.5595753	0.00037145496274194916	0.00790838398654506	1.1789508
CCDC189	3.5559905	0.000376557649334973	0.008001003640065476	2.7014005
UBE2E2	3.5518467	0.00038253742820686294	0.00810713232903075	1.9108539
APEX1	3.5517378	0.00038269598280816553	0.00810713232903075	0.38019913
MDM4	3.5503953	0.0003846532267343148	0.008140487044191186	0.95548224
SCFD1	3.5464537	0.00039045329216892254	0.00824682330798492	0.9246705
UNC119	3.5347679	0.0004081335138234883	0.008603163236384314	1.2036737
RHBDF2	3.5284524	0.00041799707498174426	0.008793649641727713	2.214852
OCIAD2	3.5111394	0.0004461902665343184	0.009368233740294588	1.3113844
PAIP2	3.5094447	0.0004490433741905028	0.009418839768893298	0.58607495
MOB1A	3.5031657	0.00045976348907480493	0.009634196698652241	0.8228372
TUT4	3.4957528	0.0004727262094922908	0.00989607652528694	0.79952407
AL138963.3	3.4940672	0.0004757211051522593	0.009948979533415343	0.64954716
BNIP2	3.490487	0.00048214104366518687	0.010073337777715971	0.6187626
SERPINF2	3.4885378	0.0004856700434565843	0.010127172700272639	4.4367995
UBL5	3.4816113	0.0004984065951654073	0.010362277490296234	0.24503446
MSL3	3.4732127	0.0005142676963534774	0.010655448597278286	1.0310583
GRB2	3.4723108	0.0005159986228451681	0.010675850884527119	0.4466826
LPGAT1	3.465473	0.0005293000166022665	0.010940410158516623	1.3756405
LYN	3.4647458	0.0005307327541552696	0.010959373736047018	1.3360564
NUCB1	3.4619563	0.0005362644956640175	0.011052141044843011	0.57902837
PRRC2C	3.4589257	0.0005423345825716613	0.011166422300790575	0.34265816
BUB3	3.4576626	0.00054488339385667	0.011208051164349626	0.8393288
DDOST	3.4559178	0.0005484224107295263	0.01126994807131043	0.5821929
MAP1A	3.4441683	0.0005728188159069211	0.011748585723745715	3.5340493
ARFGAP3	3.4401224	0.0005814511274757541	0.011891234644501744	1.1235112
RPN2	3.4354813	0.0005915024149740682	0.012073574725607923	0.46134087
TIMM13	3.431742	0.0005997179141648853	0.012229530504672048	0.43612805
AC134669.1	3.4273756	0.0006094453516023346	0.012407948802879975	0.64127696
LINC02611	3.4160895	0.0006352733593088215	0.012880485299465515	4.73538
LSM8	3.4149947	0.0006378326694931317	0.012907766933824375	0.65827703
EIF3L	3.4105852	0.0006482363210920569	0.013105834898580759	0.29307908
AL022328.3	3.4028544	0.0006668579975339725	0.013443983648862618	3.8393629
LHFPL2	3.3973818	0.0006803397314300803	0.013702789533888616	2.6808558
IGF2R	3.395394	0.0006852989954577324	0.013789616210397834	1.7832403
HMGN3	3.3893445	0.0007005996772178608	0.014057598617685548	0.4707975
ANTXR2	3.3831697	0.0007165432681432391	0.01435043198694779	1.2746972
RNPEPL1	3.3773768	0.0007318072607021242	0.014628579537475074	0.949175
HYOU1	3.3711045	0.0007486744851199013	0.014937671317087413	1.8376106
KRTCAP2	3.3608975	0.0007768963319315183	0.015471730415591259	0.6822107
LARP7	3.3335707	0.0008573886741579776	0.01697932933954006	0.6176827
CNDP2	3.3251767	0.0008836253429683202	0.017482630157761116	1.3897771
STT3A	3.3118484	0.0009268178678231333	0.018320157277630318	1.3618151
NSMCE1	3.3088906	0.000936664650890154	0.018494395579283382	0.8511965
Z93930.2	3.305828	0.0009469613711300064	0.018666284895796206	1.4786772
TUBB6	3.288104	0.0010086456425917724	0.019808757315128725	1.6718922
ITCH	3.2866228	0.0010139653772542727	0.019894861262750117	1.2808412
GRASP	3.2858436	0.0010167743627401647	0.019931588867392228	1.2135465
NRP1	3.2770338	0.0010490380873901203	0.020526210745814597	1.2964823
TAOK3	3.26901	0.001079244872280771	0.021060489550625967	0.6446292
IL10RA	3.2685943	0.0010808316568073127	0.021070768568867766	1.1822593
GDI2	3.2619357	0.0011065420695461846	0.021493190207468312	0.38210905
SLTM	3.2570765	0.00112566083111534	0.021824685703730327	0.42153224
ZNF428	3.2566903	0.0011271933470991325	0.02183449480824358	0.61088663
EMB	3.2548683	0.001134449265521017	0.021955051345192458	0.7091816
TTC39A	3.2404838	0.001193270977917424	0.022947269827600085	5.177209
CUTALP	3.2379122	0.001204079117826648	0.02313419941920052	1.5778445
ADA2	3.2359653	0.0012123216755186995	0.02325055880667919	0.8536195
RIPOR1	3.2342842	0.0012194808358779285	0.023366790899358253	1.6408584
GNG7	3.2304971	0.001235751588442163	0.023635971703755726	2.3579693
CALM2	3.226081	0.001254979115774979	0.02396254001153148	0.290427
PIK3CG	3.226058	0.0012550787330314575	0.02396254001153148	1.5026411
PIM2	3.2213237	0.0012759990050872276	0.02434011016968632	2.0453968
HDAC9	3.2205946	0.0012792498322125134	0.024380255090795652	2.019925
SCRN1	3.2129183	0.001313936456915642	0.025018902866731235	1.9480586
IGFLR1	3.2038019	0.0013562580108905506	0.02577859842147553	2.7498055
EIF3G	3.2028975	0.0013605231921544614	0.025828602657169023	0.3094072
ZNRF2	3.1964004	0.0013915382621559871	0.026331518948216805	2.446155
TRADD	3.1922817	0.0014115355012088834	0.02666247653215963	1.2083306
HNRNPA3P4	3.1917117	0.0014143247958902675	0.026691458814365663	0.5173243
OS9	3.1745667	0.0015006038582504964	0.028244551735513105	0.6515639
SLC7A6	3.1679492	0.0015351838071104792	0.028818909438157795	1.8362466
SF3B2	3.1664724	0.0015429993791335702	0.02890447967000289	0.43758094
SMIM3	3.166318	0.0015438191219673367	0.02890447967000289	0.986754
PTPRS	3.1649368	0.001551166432272689	0.02901649854706053	2.7777894
AIP	3.1646051	0.0015529355415629287	0.029024065055801344	0.7875869
ADGRG5	3.1571493	0.001593197776993263	0.029724318876201503	3.875402
RER1	3.149096	0.001637764333860455	0.030475598964897654	0.57734555
MRPL34	3.1470106	0.0016494906636643047	0.03066697283695463	0.6330956
HNRNPD	3.1428487	0.001673123478805878	0.031079181895827267	0.24709454
KATNBL1	3.1421034	0.0016773874166019084	0.031131198048609064	1.1573917
FMNL3	3.1367762	0.0017081643956299514	0.03158474116007215	3.1387146
ELMSAN1	3.13659	0.0017092499447667047	0.03158474116007215	1.2321562
MIIP	3.1340046	0.001724380898083059	0.031809069662904234	1.2841278
ANKRD36C	3.1316602	0.0017382088688217886	0.03203636432493121	0.9718334
MGLL	3.1261945	0.0017708442096139355	0.03260959783054441	1.2824438
IFNAR1	3.1214557	0.0017995939173750925	0.03308173122614593	0.80662227
ACAA1	3.120622	0.0018046961483593085	0.033118276427484154	0.79818463
SMIM6	3.117153	0.0018260683819249467	0.03342396593387409	4.3021917
ZFAT-AS1	3.1128638	0.0018528147469464675	0.03388436530765642	5.7162356
CUL4B	3.1063712	0.0018939880130343881	0.03457788072895142	1.9900719
SLC25A45	3.1004193	0.0019324691650609886	0.0352501600957823	1.7630901
PHC3	3.099606	0.001937782668315296	0.035286557853080505	1.5257134
LAMTOR5	3.0946035	0.001970761256615891	0.03585639107524669	0.36937585
LINC01226	3.093972	0.0019749611954343414	0.035902093731361544	4.1709285
TOMM7	3.0926747	0.00198361346827242	0.036028586555667035	0.1854003
H2AZ2	3.0915844	0.0019909137348420865	0.036130327838188	0.27987808
NUTM2B-AS1	3.0907893	0.001996252382919406	0.036195111433004676	1.3223834
PIP4K2A	3.0905461	0.0019978871043465837	0.036195111433004676	0.85954344
SNU13	3.0815547	0.0020592267476539864	0.037211294558923226	0.36284736
SNRPB	3.0747917	0.0021064964556179464	0.03790446117981227	0.26486894
LINC00893	3.0727267	0.0021211269216470274	0.0381354594222406	2.550197
CRYM	3.0713227	0.0021311268555829575	0.03828288605692054	4.365823
UBE2V1	3.069042	0.0021474649035644554	0.03848941551531329	0.46077603
ETS1	3.06717	0.0021609595351585746	0.03868808783946778	1.6311283
NDUFAF3	3.0656524	0.0021719563681254768	0.03885226240005111	0.5125551
IQSEC1	3.0643644	0.0021813307328787815	0.03898716248537715	1.2872405
ZMYM2	3.061009	0.002205924782973484	0.03939363073808819	1.0590935
QDPR	3.0513928	0.0022778246023518493	0.04050756811657315	1.3543278
MED10	3.0497139	0.002290594854320046	0.04070063655516546	0.6810403
SRGAP2	3.0408585	0.002359045907581985	0.041777308416620515	1.2001501
CARD11	3.0365129	0.0023933198810552505	0.042322106919528625	3.483823
EAF2	3.0364537	0.0023937888299493597	0.042322106919528625	0.98632675
AC007381.1	3.023473	0.002498913852720184	0.04405943157027036	4.0044765
SLC39A10	3.0217578	0.002513115729454421	0.044247896067687156	1.4481499
NDUFB10	3.0197017	0.0025302364466033658	0.04447570163868346	0.29088053
DDRGK1	3.0168712	0.002553982746916956	0.04485228839038108	0.8439229
RNF7	3.0166464	0.0025558782043886346	0.04485228839038108	0.42821455
SSR1	3.006755	0.0026405235049521522	0.04618527502206195	0.757431
BCL7A	3.0051558	0.0026544480361153475	0.04639067812665351	1.7745409
NAA10	2.9940221	0.0027532607328714116	0.048038640301429084	0.6493981
ATP5F1A	2.9914753	0.0027763291232411865	0.048401429608374416	0.28973693
SPAG7	2.9883244	0.0028051156662534517	0.04882324476722149	0.7651175
PTGES3	2.982159	0.0028622333880770562	0.049588692462861385	0.2664512
TMEM243	2.982068	0.0028630830948513696	0.049588692462861385	1.0294435
ECHDC1	2.9784741	0.0028968742294753205	0.05013313099000048	0.7415697
SAP18	2.976341	0.002917102801679654	0.05038005290304301	0.27602264
HS3ST3B1	2.9762206	0.0029182483979758797	0.05038005290304301	4.380114
MARS1	2.9735196	0.002944056834970829	0.05078438347363712	1.6418495
VASH2	2.9712229	0.00296616526427	0.05112428606625497	3.6954713
KDM5A	2.968072	0.0029967425112207894	0.051526044034886795	1.1251374
BRD4	2.9573834	0.003102621605802366	0.0533034401727064	0.58417994
ANGEL2	2.95525	0.003124156396446802	0.05363009071511463	1.400314
ARGLU1	2.9534986	0.0031419400999535027	0.05389187418218633	0.44473362
WAC	2.9412222	0.003269200265539397	0.05589438942745775	0.5742959
FES	2.9401045	0.003281016637714147	0.05605135973296562	1.0058467
PBX3	2.9365242	0.003319129853380907	0.05665696055502288	1.5833338
NFKBID	2.9341137	0.0033450152082845513	0.05705303004410916	1.925044
AZIN1	2.9300315	0.0033892765332032516	0.05771539038006402	0.83200055
SYCP2L	2.9202266	0.0034977691047117588	0.05946766673710183	5.0949807
OSTF1	2.9172437	0.0035313958621973145	0.059943542372765106	0.75647527
PHB	2.914763	0.0035595864206726655	0.06032577177791787	1.4240993
DTNBP1	2.9076934	0.0036410510241882367	0.06160820543632427	1.2128754
CARD9	2.9013257	0.003715874174801599	0.06277436681799461	0.68177724
AL035587.2	2.8999376	0.0037323686018235114	0.06300297443824147	2.503118
PLVAP	2.898168	0.0037534948335778756	0.06330934307324967	4.754528
NMT1	2.8951578	0.003789678199841605	0.06386899020002464	0.6840477
LTK	2.894054	0.0038030292426897557	0.06404325333552527	4.7318583
ZFAND6	2.8928907	0.0038171407590246224	0.06423003702823947	0.7936323
ZC3H15	2.8907552	0.003843172543359363	0.06461694610649034	0.37398028
XBP1	2.8846784	0.003918137357513222	0.06572150114901318	0.37948892
GAS5	2.871775	0.004081736630299699	0.06814321537664388	0.09379493
INTS10	2.8676994	0.004134682480155348	0.06897298954543067	0.9439381
CREB3L2	2.8637488	0.004186599161824027	0.06978430844266084	1.4458301
HNRNPM	2.8581195	0.004261600186713304	0.07077746708083504	0.34458312
ATRX	2.8580284	0.004262820787556993	0.07077746708083504	0.4655482
OCIAD1	2.857163	0.0042744629127008755	0.07091540693466063	0.37975705
SYS1	2.8557112	0.004294053429132717	0.07112945668553253	1.541722
TMX3	2.8506432	0.004363091623301582	0.0722168060202345	1.1027136
TSEN54	2.8480828	0.004398347738637336	0.07274374654205093	1.8268719
FNBP4	2.8476262	0.004404662717843074	0.0727915861272761	0.73629427
HYI	2.8458223	0.004429688883532161	0.07314833296882417	1.0982658
CSNK1G2	2.8450387	0.004440603078340265	0.07327167329186897	0.8316329
BTK	2.8439233	0.004456178056387737	0.07347166750489208	1.0653887
RNU2-63P	2.8380122	0.004539545204759688	0.07467253438517696	0.75065356
BOD1L1	2.8362584	0.004564550167295389	0.07502582496770142	0.5816962
TPST2	2.8357973	0.004571145988781776	0.0750762193323549	1.3344373
LRRC36	2.8304315	0.004648528537521656	0.07614124254642166	4.074131
LYSMD2	2.8303087	0.004650311442371608	0.07614124254642166	1.176821
GUCY1A1	2.8275008	0.004691289799776458	0.07663520948651727	2.1971369
SLC2A6	2.8270693	0.004697617969598386	0.07667969040321418	1.5094082
TMEM63A	2.8256788	0.004718053906060328	0.07695420899386282	1.9156966
TFPT	2.8251088	0.004726458556921221	0.07703221995950763	1.6521844
GRSF1	2.824275	0.004738771824383038	0.07711471915287134	1.0207541
SEC13	2.8233685	0.004752191665163214	0.07721549335322578	0.763959
ALCAM	2.8233662	0.004752225342017609	0.07721549335322578	1.806407
ZDHHC14	2.822912	0.0047589650561724066	0.07726597540437474	1.829458
ALG5	2.8218987	0.004774025784960476	0.07745137636943125	0.84501886
TPM4	2.820906	0.004788824422897035	0.07763224592271115	0.32830572
NSMCE4A	2.8201926	0.004799483386639432	0.07774578229279061	1.0067873
FXYD5	2.8170984	0.0048459664519502	0.07825573535499496	0.18739642
TTC14	2.8091633	0.004967044923261204	0.07997280732236378	1.1908981
CDC40	2.8067665	0.005004148794732916	0.08044840568040393	0.64616543
RUBCNL	2.8054695	0.0050243349648251	0.08071191870609143	3.3818762
TMEM230	2.8048902	0.005033373562311823	0.08079609229947936	0.5527406
NDRG1	2.8025525	0.005069996503575603	0.08122070743108455	0.8307478
RNF11	2.8020096	0.005078537104044557	0.0812757002753376	1.2887731
HNRNPDL	2.7969096	0.005159398665073434	0.08238382147706222	0.2575781
CCDC107	2.792541	0.005229585435956927	0.08344189995301417	2.1186051
DEF8	2.7919366	0.005239361675253633	0.08353521999323052	1.5841327
VPS13C	2.7890198	0.005286784840693011	0.08411245891325088	1.0923505
FO393401.1	2.78118	0.005416171242996317	0.08603177458348668	2.1678798
SON	2.767054	0.005656535059994037	0.08971576748024847	0.22149774
PSMB4	2.7636988	0.005715026177657281	0.09050848233253367	0.42028686
SNORD3A	2.762849	0.0057299233511917055	0.0906768896997741	1.2901108
XPA	2.7577856	0.005819437495060497	0.09182018997213777	0.83265746
THEMIS2	2.7549253	0.005870552844975829	0.09255803444017116	0.67673725
IAH1	2.754237	0.005882914895497623	0.09261563057908137	0.86312276
ZBTB8OS	2.7536669	0.005893173169685969	0.09270850602518556	0.7980546
PQBP1	2.7493868	0.005970687644912481	0.09385850371001	0.6806058
FLOT1	2.7481668	0.005992949362454415	0.09413887739294162	0.8026096
KIAA0100	2.7473013	0.006008789313112898	0.09430268372644036	1.3155271
COA4	2.7471128	0.006012245010722325	0.09430268372644036	0.602895
AC135983.2	2.744959	0.0060518421163508205	0.09478396905203654	0.9541319
EID1	2.7382894	0.006175971044071048	0.09658582951201995	0.23488754
GNB1	2.7363129	0.0062131909090262435	0.09702522572986724	0.7111406
ZNF787	2.7354314	0.006229855135412422	0.09721407841165576	0.90139633
DMXL1	2.7349954	0.006238116223888609	0.09727162314214576	1.144796
RMDN1	2.7333188	0.00626996166806755	0.09769656755906866	0.9313011
SYK	2.7325418	0.006284768874791554	0.09785559970566732	1.761375
AVEN	2.7321148	0.006292921909317626	0.09791086765857834	1.8602252
UFD1	2.72343	0.00646079314410776	0.10030263458542185	0.7833263
HVCN1	2.719352	0.006540994261946701	0.10139971352576121	1.5908074
KTN1	2.7172122	0.0065834403546115965	0.1019833888581457	0.29262847
SRP72	2.7165532	0.006596557397644096	0.10211221200181388	0.384575
RNU5A-1	2.7161443	0.006604710826273142	0.1021640687738207	1.3427082
POLM	2.7156808	0.006613962332686394	0.10223282329499049	1.990397
ATP2A3	2.7134728	0.006658203264875211	0.10284192101716112	1.5197675
CD36	2.7128708	0.006670310902325829	0.10295416733060092	0.5829876
MRPL41	2.7121596	0.0066846371151722	0.10310046903741661	0.4578255
GORASP2	2.7111943	0.0067041339180389055	0.10332624949476049	1.0333323
KCNG2	2.7098858	0.006730639404508642	0.10365964481860557	4.399214
BUD23	2.7028184	0.006875431539888649	0.10566008195223388	0.76744306
PSENEN	2.6979954	0.006975840363093999	0.10712573912104423	0.49861464
TMEM14B	2.6973548	0.0069892763792223575	0.10725463153656589	0.35297325
PAK2	2.6946878	0.0070454622706117055	0.10803888755129082	0.6097246
PSMA2	2.6911573	0.00712045805145075	0.10895325345057988	0.29523987
DYRK4	2.6879928	0.007188292312078065	0.10991214175815124	1.7260808
HCLS1	2.6877089	0.007194407647354249	0.10992662087038614	0.4211854
SH2B3	2.6869433	0.007210917862592311	0.11009979326595538	1.0862403
RSRC1	2.6841242	0.007272010186781716	0.11095293017407482	0.80111235
RASSF5	2.6759617	0.007451514999085462	0.11352884850684003	1.0003443
CYTH1	2.6659162	0.007677885477780296	0.11656027567944977	0.9843026
KPTN	2.664326	0.007714279451627663	0.11694583724637832	2.6498332
CAP1	2.6592689	0.007831042005797277	0.11858009334783419	0.39341232
KDM2A	2.6591372	0.007834105388136179	0.11858009334783419	0.81690437
ERICH1	2.6523333	0.007993758504568776	0.12066660726307543	0.5398446
DDB1	2.6451933	0.008164428103395885	0.12272276963292723	1.0140765
RUBCN	2.6451864	0.008164592553979597	0.12272276963292723	3.0823305
EIF1B	2.6446638	0.008177209261989898	0.12282561002349093	0.38722265
TCOF1	2.6412132	0.008260973453546669	0.1239962204541172	1.0149052
RGS10	2.6397116	0.008297662964972943	0.12445909280818726	0.5182371
ABCA7	2.6369696	0.008365035127834007	0.12538120657780233	2.0385215
MYCL	2.6360176	0.008388536976791408	0.1256449246192792	3.2375824
TNFAIP8	2.630922	0.008515354760790184	0.1273650354481339	0.80575436
TOX4	2.6298134	0.00854317198571941	0.12769130355886585	0.7091847
HIVEP1	2.6294909	0.008551281588108046	0.12772275849541434	1.8196582
DSTN	2.6285095	0.008575995390251502	0.12791223419022385	0.37468162
SDHAF3	2.6246135	0.008674737999936344	0.12920378327776336	1.3116679
ARHGAP24	2.623975	0.008691013348690777	0.12935560735710577	2.0461125
WNT10A	2.6111443	0.009023980764011159	0.13384312891893538	5.2437215
NFATC2IP	2.6091428	0.009076933033450155	0.1345346959501403	1.3562307
CRIPT	2.6053421	0.00917825238182754	0.13594167820967265	1.019678
CYBC1	2.6040974	0.009211658870871803	0.13629639179070335	0.6286216
MAPKAPK3	2.5991585	0.009345259242863833	0.13804173962010596	0.8206898
ORMDL1	2.5991313	0.009346001460009995	0.13804173962010596	0.6193123
ULK1	2.596753	0.009410962730089643	0.138808437105601	1.5974993
SETBP1	2.5961802	0.009426658119777888	0.13894358388742611	3.262699
ZDHHC12	2.5946174	0.009469627982581785	0.13948027531962048	1.0923145
GPATCH11	2.594172	0.009481901327799965	0.1395644009280121	1.4896564
FIP1L1	2.5933633	0.0095042300207183	0.1397963128012846	0.958201
NCOR1	2.5926046	0.009525221473337241	0.13999566996596688	0.49032587
UQCR11	2.592398	0.009530947863591143	0.13999566996596688	0.2109547
EIF3D	2.5915847	0.009553505666875527	0.14023016703159116	0.3803419
SLC39A6	2.588227	0.009647140177047698	0.1414093896799638	1.4950817
BCAP31	2.5873888	0.009670644382307225	0.1416562915752702	0.4286172
ARPP19	2.586255	0.009702510390662831	0.14202525361253115	0.87142205
YTHDC1	2.581432	0.009839133242631366	0.14382716490551653	0.4481664
TRAF3IP3	2.57568	0.010004316233436082	0.14604104459090736	1.393096
DNAJC1	2.5752325	0.010017271123072562	0.14612986249425947	0.64525074
SNTA1	2.572979	0.010082733212947675	0.14698399774241544	2.0953534
POLR2K	2.5635967	0.010359384875086367	0.15039846887932556	0.5149197
FBP1	2.561234	0.010430106272857032	0.15132191699685962	1.0922703
GMPPB	2.546661	0.010875909004158043	0.15736034599281457	1.9121698
KLC1	2.5425332	0.011005219484547567	0.15901495463100693	1.4296906
ELOF1	2.5346956	0.011254510099213199	0.16250656843188427	0.8797523
EIF6	2.5339072	0.011279859125787824	0.16276209209388146	0.4295634
CCDC91	2.5335665	0.011290832603634032	0.16280997874352016	0.9456837
ARHGEF7	2.5219464	0.011670746157641354	0.16781716936971677	1.4390352
QKI	2.5204608	0.011720130386576514	0.16824658040227455	0.46084705
TRAPPC12	2.5191045	0.011765372228390131	0.16865016544765501	1.2402695
PDIA3P1	2.5187728	0.011776459943055588	0.16865016544765501	0.62881094
MARCHF1	2.5187206	0.011778207482561814	0.16865016544765501	1.2265412
RASGRP2	2.5185752	0.011783071411689095	0.16865016544765501	0.4775062
ATP5PB	2.511778	0.01201245779653112	0.17158694753151135	0.30179635
FAM214A	2.504956	0.01224665924696887	0.17481489632468517	1.9435732
NBPF9	2.503291	0.012304435981596898	0.17540418826580725	0.7384112
CHCHD10	2.4983475	0.012477378214872973	0.17775040673284212	0.33573934
CLASP2	2.4944448	0.012615437011331257	0.17947674233712677	1.5940347
ATP5MC1	2.4898944	0.012778104530211281	0.181618332151023	0.2579063
FUOM	2.489631	0.012787581724139373	0.181618332151023	0.9158081
MZT2B	2.4895196	0.012791586889944634	0.181618332151023	0.16998315
IKBKB	2.4801917	0.013131172668375667	0.18619127432245472	1.5721936
WDR45	2.4738173	0.013367804465852577	0.18929416323849432	0.98970616
AC004551.1	2.4714365	0.013457145003945275	0.19043247976640854	1.0615579
IDS	2.465446	0.013684283730462377	0.1929067530343067	1.05436
TBC1D10A	2.4653845	0.01368662679068868	0.1929067530343067	1.8103887
FAM30A	2.4627879	0.013786141918246682	0.19329383068410136	0.78568363
UQCR10	2.4627767	0.013786578642521122	0.19329383068410136	0.19687228
UCHL3	2.4607594	0.01386433489961136	0.19425595453216996	0.8427428
SRP19	2.459996	0.013893857006132448	0.1944897612704708	0.6715561
COPA	2.4593258	0.0139198224535357	0.19464872042357056	0.55672485
AL355075.4	2.4576015	0.013986825472212904	0.195457155695464	2.1108487
RNF166	2.4512293	0.014236921979381867	0.19882146656564212	0.86139834
NLRP7	2.4381032	0.014764559330767172	0.20551532225529254	6.651594
PIM3	2.4341686	0.014926044529148527	0.20749153012448368	0.8237009
TCEAL8	2.4323351	0.015001816176959351	0.20840864027939152	0.5706213
CRLF3	2.427024	0.015223254191125895	0.21107131251046718	1.2866725
TMEM175	2.4252586	0.015297480401128447	0.21196228706944686	1.3387637
SELENOH	2.422242	0.015425081067230643	0.21359117787690662	0.49365243
ARPC1B	2.4202724	0.01550889121204631	0.214611976050106	1.1706158
KRT10	2.4198475	0.015527020359269183	0.21472314435714973	0.2743847
MGAT1	2.4191206	0.015558086762476091	0.21501296124178296	0.52185374
RMC1	2.4188137	0.015571209297150924	0.21505457827344354	2.109067
GLCE	2.4160469	0.015690044719104086	0.21655519865712186	2.2746465
SLC37A1	2.4153697	0.015719240593278276	0.21681746315073647	2.2595026
C9orf16	2.4144316	0.015759782339271364	0.21723578131818708	0.30440706
DUSP22	2.4132185	0.0158123382534365	0.2178190559017752	1.1746482
NOP58	2.410783	0.01591830927716503	0.21899540202027307	0.4568649
LLGL2	2.4107332	0.015920490579512617	0.21899540202027307	2.5891523
KDM4B	2.410547	0.015928623203975853	0.21899540202027307	1.3541073
SERBP1	2.4097857	0.015961885908542698	0.21931095050955726	0.195265
TUSC2	2.4077187	0.016052549780929754	0.22041425519082955	1.0619961
DENND4B	2.4069211	0.0160876409311928	0.22061124111253363	1.5568992
CCDC130	2.4019415	0.01630831496169654	0.22349326734556937	1.0084143
PMF1	2.394706	0.016633695897959745	0.22780558792897995	0.66421485
SH2D3C	2.3941882	0.01665720563091824	0.22798076355469757	1.9067088
MNAT1	2.389881	0.016853840405601596	0.2302275732734363	0.8778117
TNIP1	2.3854554	0.017057987310204616	0.23241917495242917	0.85797936
NAGK	2.3833563	0.017155577235181883	0.2335131615775633	0.7975683
CRYM-AS1	2.3832564	0.017160236567103835	0.2335131615775633	4.929592
FUZ	2.3828793	0.017177824951789475	0.233531579839934	2.4013371
HNRNPA2B1	2.37496	0.017550851713437832	0.23821893113791273	0.1404271
ARID5A	2.3738446	0.01760395869390181	0.23878737082946278	1.2765559
LINC01684	2.373347	0.017627691310885915	0.23895689387586522	2.6104798
KIRREL3	2.3681517	0.01787720963143584	0.24218495009618402	5.9884853
ATF7IP	2.3673882	0.017914127703211744	0.24253060605958662	0.7226466
CHMP2A	2.3663251	0.017965660598709503	0.2430735593345753	0.29093364
AP001931.1	2.3615704	0.018197719393999296	0.2454326530063228	0.5035031
COX7C	2.357079	0.018419323001346015	0.24779290380495156	0.12360404
VDAC3	2.3568132	0.018432511345054654	0.24781358015042187	0.39453647
CMKLR1	2.3525584	0.018644765547601746	0.25019275610848046	4.4562273
AL645941.2	2.3509796	0.01872406736047409	0.25078223469138755	2.5285997
SUSD1	2.347197	0.018915250624996396	0.25318342702520347	1.3790433
CDK11A	2.3450456	0.01902474951825009	0.25448892924758565	0.7275703
METTL23	2.3434486	0.019106393423405824	0.2553206069610784	0.7377464
CLTC	2.34336	0.01911093169787187	0.2553206069610784	0.5843734
ARHGDIA	2.3378966	0.01939261899483715	0.2585100060591731	0.54033166
GAK	2.3378737	0.019393797785217742	0.2585100060591731	1.1787843
IRF2BP2	2.3361971	0.01948096550257617	0.2594493771285489	1.317471
CYP20A1	2.331079	0.019749195968147094	0.2626927136000754	0.7997934
COX14	2.3297477	0.019819488394783452	0.26312788828653333	0.41718158
VPS4B	2.3293025	0.019843047873760775	0.26312788828653333	0.54288906
TM7SF2	2.3284438	0.019888553068809343	0.26355740512181053	2.5060654
PSMB6	2.3271785	0.01995577304676409	0.2642835223733657	0.2543428
DYNLRB1	2.3222191	0.02022113766879722	0.2674647867398309	0.3351277
TBC1D10C	2.319852	0.020348884738662948	0.26865327716115595	0.8908998
MX1	2.3184435	0.02042522907146663	0.2693268426044785	1.0058823
UPF3A	2.3152063	0.020601645508472446	0.27148475732323446	0.83059496
HHEX	2.298693	0.02152238023204989	0.2825675957749809	0.9045628
ACP5	2.2960851	0.02167102165559241	0.2843435901251048	3.2282758
CAPN15	2.2934499	0.021822123634657388	0.2861496594238767	1.8732095
IRAK4	2.2914348	0.021938282302603116	0.2874955799716979	1.3454231
FNBP1	2.2886882	0.02209747518342874	0.28904747827573546	0.64488554
RAB8A	2.2879908	0.022138058463760407	0.2894003475511494	0.8134369
URI1	2.2867687	0.02220933470672205	0.29015377142338533	0.5136256
IREB2	2.285685	0.022272696270495693	0.2908029324598974	1.1538893
ABI2	2.2842946	0.022354220524507185	0.2916882922305174	1.3983535
AP2M1	2.2831247	0.022423024350325976	0.29240668602518893	0.30953935
SURF1	2.2807667	0.0225622604680121	0.29404210655278756	0.5474088
GTF2I	2.279456	0.02263998307025893	0.2946938800008183	0.6764843
CSNK1E	2.2735083	0.0229955607901998	0.29877372171457517	1.2328432
KYNU	2.2719476	0.02308966901559591	0.2996695455139719	1.4433764
CYYR1	2.2718978	0.023092688189261364	0.2996695455139719	3.7010596
LENG8	2.2705598	0.023173647260071994	0.3003536280161312	1.1718615
ITFG2	2.2681198	0.023321904964659697	0.3019072408358777	1.3208085
RBBP4	2.2654483	0.02348518677052398	0.3038360324953008	0.5335511
SNAP29	2.260314	0.023801763663244414	0.3073708022790197	1.0238972
ORMDL2	2.2598212	0.023832354537052965	0.3075790950537497	1.2363381
MAN2B1	2.2589648	0.02388558199019353	0.30807910451754167	2.3317022
BEND6	2.2575903	0.023971215556275727	0.30899623252510816	2.869172
MEAF6	2.2538443	0.024205973218963853	0.31164457893107883	0.55664396
PPHLN1	2.25344	0.02423143273603315	0.3117836314958796	0.5017265
MRPS12	2.2475083	0.024607562792755035	0.31624063627740595	0.5233663
ATP5F1EP2	2.241395	0.025000500071863604	0.3210963985679149	0.3952958
MIEN1	2.2399547	0.025093863016598748	0.32210100935427805	0.56237715
UBAC2	2.238871	0.025164304951239107	0.32261579385648254	0.7989168
TLE3	2.2325056	0.025581561540865896	0.32736434951875043	0.739332
CD68	2.232283	0.025596262788550563	0.32736434951875043	1.4394538
SNF8	2.2308178	0.025693203467424774	0.32840669744510664	0.43677276
FRG1HP	2.2281213	0.025872434501801992	0.33035087961607623	0.3815772
ATG12	2.2280622	0.02587637244065932	0.33035087961607623	0.5921183
KANSL1	2.2264879	0.02598152483321977	0.33109709507354784	0.54531807
ARHGAP15	2.2207904	0.026365170002681647	0.33558396217057807	1.0461771
TAPBP	2.2188616	0.026496144599746564	0.33664006604188	0.36407396
PRKCD	2.2186368	0.02651145378814937	0.33664006604188	1.4184873
TCEA1	2.2104516	0.027073839170884087	0.34255412571417826	0.23627405
FBXW11	2.2104516	0.027073839170884087	0.34255412571417826	1.0602124
PIK3CD	2.20977	0.027121126615859432	0.3429484197340751	1.4870961
JMJD1C	2.2092612	0.027156481043823386	0.3429876456776007	0.5236807
ACTR6	2.2074687	0.027281327681354238	0.3441156675062458	1.0560424
ARMC5	2.2047403	0.027472317375691422	0.34594950755688625	1.7141786
WASHC3	2.2043905	0.027496890548674706	0.34605406217737417	0.74708796
PSD4	2.1918232	0.028392272235882317	0.3556391273174211	1.7589176
LINC00342	2.191512	0.02841476142213648	0.35571133648465025	1.2411861
PRMT1	2.1910622	0.028447291157312357	0.3559090797793391	0.32964697
PIK3AP1	2.184833	0.02890108757228928	0.3609496368614332	0.98467845
FAM160A1	2.1799488	0.02926125494879394	0.3652333518227103	3.7815118
USP46	2.1773887	0.029451587730396783	0.3669629873683709	1.4022341
SMIM30	2.1762004	0.02954027546957452	0.3676372843548159	0.87287813
AL034430.1	2.174583	0.02966138204126511	0.36892861674600447	0.6241942
OTULINL	2.1741173	0.029696330275529665	0.36914742760388103	2.1401515
MYD88	2.1721249	0.029846240572204853	0.3707905023341804	0.8272286
TMA16	2.1689105	0.030089485787688976	0.37316225843635964	0.68071157
MIB2	2.1684537	0.030124176466800535	0.3733747723032521	1.3974123
LSM7	2.15819	0.030913058752210457	0.3820503325646887	0.15127373
FOXP1	2.1581788	0.030913941527285216	0.3820503325646887	0.409849
TMEM219	2.155305	0.031137980085609706	0.38392678170483063	0.32936695
ETV6	2.1537988	0.0312559566072254	0.3851581350400215	1.035095
GNL3	2.1459136	0.03187987763349056	0.3926190604439553	0.51864004
DSN1	2.1431305	0.03210260911286027	0.3949047965421776	1.7339437
UBE2A	2.1425285	0.03215096691508333	0.39527104931613144	0.5361869
MYO9A	2.1411839	0.03225922196888583	0.39591540222517757	1.384566
SLC35C2	2.1377988	0.03253307147437506	0.3985863463067299	1.0575417
GLCCI1	2.1354816	0.0327216849870684	0.40066638917096015	1.6512196
ERGIC3	2.1323104	0.0329813438834927	0.40340968292134527	0.39537567
SFSWAP	2.1320512	0.033002625806720615	0.40340968292134527	0.67649007
TAX1BP3	2.1291254	0.03324389202523176	0.40565940303193015	1.2027504
LINC01724	2.1273034	0.03339488269348781	0.4070348194887061	5.214574
ANKRD36	2.1264877	0.03346266065799754	0.4074699296066322	0.95107895
CDC73	2.1252656	0.033564453517146015	0.4081660159269174	0.7467077
PTCH2	2.1241753	0.03365549588478186	0.4090392811276717	1.7866402
PNRC1	2.1221237	0.033827341825513495	0.41065852356555166	0.10574952
VIPR2	2.1203747	0.033974469246701944	0.41210434529157414	7.167148
NUDT5	2.1202474	0.03398519073023749	0.41210434529157414	1.0259632
QARS1	2.1173031	0.03423412576601069	0.4148863936850606	0.61169
ST3GAL2	2.116817	0.034275380318020736	0.41514980864691514	3.073706
HNRNPU	2.1145089	0.03447182318333684	0.4172915237828066	0.16565512
HLA-DOA	2.113691	0.034541659336745724	0.41789906281754535	1.5958365
PSMD13	2.1106107	0.03480579487036321	0.4206161653964518	0.443389
MICAL1	2.1089954	0.034944978700638715	0.4219632236654534	1.3209649
NUP42	2.108857	0.034956942032936617	0.4219632236654534	1.1717894
ACY3	2.1081185	0.03502074006085924	0.42235116278436974	2.7971804
ATF6B	2.1080253	0.035028795484114354	0.42235116278436974	0.764678
AP001442.1	2.10559	0.03523997740901792	0.4244162398144973	3.2632987
IRF3	2.1022506	0.035531330542877555	0.42719947389285623	0.8028771
YBEY	2.1016326	0.0355854654898827	0.42760162244480815	1.3222893
NPIPB5	2.1014102	0.03560498722787885	0.42760162244480815	1.4955112
LINC01374	2.0964282	0.036044231535937686	0.4323884718205632	3.4957912
CORO1B	2.092573	0.036387293219955104	0.4359077170041167	0.7872552
GALNT3	2.0923731	0.03640515873531475	0.4359077170041167	1.8386359
EIF4B	2.0922117	0.03641957840595775	0.4359077170041167	0.30098173
MAP3K2	2.0914643	0.03648645986389886	0.43621726523061544	1.2406639
OGA	2.0904715	0.03657545813618164	0.4370356287069929	0.59028
ANKRD44	2.0854146	0.03703167532204526	0.4417424018085141	0.94026786
LSM4	2.08509	0.03706114798940982	0.44184616400602994	0.29997554
JKAMP	2.0834906	0.03720653556286826	0.4433309831297731	1.0024828
PACS2	2.0822818	0.03731672414787719	0.4443949641104143	1.4530736
GPRC5C	2.0798693	0.03753751794464346	0.4462747172524437	2.0687823
EZR	2.0770638	0.03779567622283685	0.4490928701583894	0.4783772
RBM25	2.0756166	0.037929420925574775	0.4504304040569793	0.31747094
GTF2A1	2.075235	0.037964761261598076	0.4505984973621258	1.463128
SRSF11	2.074533	0.03802983536434622	0.45107507379274087	0.20997195
TBCB	2.073488	0.03812688513619282	0.45151487748423447	0.44805762
TRIP12	2.072609	0.038208696571376065	0.45223192397139533	0.6194371
NDUFA12	2.0709913	0.038359602636299076	0.45366389871473134	0.24052379
GABPB1-AS1	2.0708551	0.038372342554318574	0.45366389871473134	0.5397116
LINC00909	2.0702598	0.03842801568172215	0.45384689016798985	2.4155757
CADM4	2.0700054	0.038451835821275926	0.45384689016798985	5.017485
CTNS	2.0695102	0.0384982360102961	0.4541425300626665	2.5325627
C1orf43	2.0683017	0.038611669310280095	0.45497595266501234	0.5102193
CHD2	2.0624087	0.03916884033524602	0.4610304732099323	0.59883195
STK11IP	2.059544	0.03944215035772914	0.4639488912725032	1.9701453
PCNT	2.0584037	0.039551403850432	0.4647617726490819	1.5136784
NAXE	2.0577924	0.0396100536828121	0.46519394355589755	0.8315834
PBX2	2.0575244	0.0396358044012993	0.46523947230200596	1.3446691
P2RY6	2.0568929	0.03969652752083807	0.46543850266852527	4.7589326
TEX2	2.0560796	0.039774841201841334	0.4655867350148395	2.2231786
LAP3	2.0555139	0.03982938804472588	0.4659687867564768	0.41684136
PSMB10	2.0550277	0.03987631836555899	0.46626136081202535	0.57600284
PRR13	2.0507705	0.04028929560780104	0.47031450509457756	0.28708425
TAP1	2.0478513	0.04057456516602391	0.473384764956754	1.0543529
SNX29	2.0379558	0.04155436881869666	0.4842848604958133	0.9205374
TASP1	2.0365653	0.041693619325201964	0.48537580154773974	1.7555039
CCDC112	2.0314562	0.04220874021686584	0.49003149327102596	1.3331782
AKR7A2	2.0301907	0.0423371466558923	0.4912541037775086	0.57100165
AC025257.1	2.0256338	0.0428023356362112	0.4961105594804229	0.57260555
MEF2A	2.0246887	0.0428993446227212	0.49696413985874577	0.57310647
CCDC85B	2.022785	0.04309532614967128	0.4986912360594986	0.2505586
TMEM259	2.0198112	0.04340297347853548	0.5013189602541793	0.5187799
ATF7IP2	2.0196476	0.04341994895547504	0.5013189602541793	0.8428713
MFSD12	2.0192251	0.043463828233988755	0.5013189602541793	1.5390003
PSMD8	2.0186117	0.04352759061344044	0.5017822898413359	0.25346425
SRSF6	2.0177097	0.04362148842037851	0.5025923278510458	0.570854
U2AF1L4	2.0138729	0.044022882435649065	0.5066681204133224	1.189922
NCOA3	2.0115829	0.0442639179842537	0.5088424393247142	1.1608032
ITPR1	2.0113966	0.044283574930182236	0.5088424393247142	1.0171018
SNHG14	2.0096996	0.044462984395585804	0.510077246553244	1.6165609
DEDD2	2.0068896	0.04476142737917216	0.51294762873255	1.05671
SNHG6	2.005924	0.044864353590709956	0.5137207924343896	0.104547165
UFM1	2.0058036	0.04487720308162565	0.5137207924343896	0.7600424
ELL	2.0032706	0.045148247595906375	0.5157132535538844	1.4396996
CRELD2	2.00258	0.04522238572466674	0.5161562486202909	0.5975103
COMT	1.9985499	0.045657070536440594	0.5206864521391715	0.28539076
PMEPA1	1.995951	0.045939248895387	0.523623732452297	0.94999117
TERF2IP	1.9949946	0.04604346160528678	0.5245304686035589	0.42488307
AHCY	1.9929706	0.04626467299504897	0.5267683779077604	0.7355476
NME3	1.9907942	0.04650351632202622	0.5280743666060735	0.34625864
TMEM248	1.990074	0.04658277722229752	0.5286921498084557	0.59189093
SLC12A3	1.984656	0.047182762613680145	0.5349307985236477	5.6504903
STT3B	1.9827226	0.04739841290039241	0.5370894214056718	0.50986826
EFHC1	1.9821002	0.047468022861413044	0.5373056829374103	1.3820608
NCKAP1L	1.9805077	0.04764650393717372	0.5390390916168871	0.73801035
TPM3	1.9741082	0.04836943684564033	0.5457663407267502	0.07705995
SLC66A2	1.9736948	0.04841645906579735	0.5459502618837749	0.66502273
BAZ2B	1.9732882	0.048462743637997414	0.5459502618837749	0.57695484
GON4L	1.9721727	0.048589893797924284	0.5470928804595296	0.7718912
THUMPD3-AS1	1.9719205	0.04861867732914934	0.5471273270442737	0.6837226
MXD4	1.9707847	0.04874851043587499	0.5474298143931495	0.59849006
GAB3	1.9684379	0.049017667716167744	0.5501618863615682	1.5872543
ZDHHC4	1.9661139	0.04928544756661653	0.5524753414388447	1.7648944
SLU7	1.9659731	0.049301716021013076	0.5524753414388447	0.72393847
STX18	1.9652325	0.049387330751534744	0.5531433058211651	1.0577106
MAP2K3	1.9601074	0.0499832302978567	0.5574689696932953	0.5389655
ATP6V1D	1.9566522	0.05038837978466987	0.5613988735673879	0.66989344
TRAF3	1.9551619	0.05056396633127321	0.5630602093716491	1.2264516
HM13	1.9538602	0.05071775607627946	0.5641819843025041	0.96543604
TMEM53	1.9535421	0.0507553907380808	0.5643005726074771	2.6133375
HAGH	1.9529787	0.050822115275756224	0.5644572166057751	0.7873609
TBC1D1	1.9509523	0.05106271605087244	0.5668334591263079	0.8902709
RAB5C	1.9486511	0.05133711029778374	0.5692851923480513	0.41443115
GMCL1	1.946795	0.05155931167877678	0.5714512767565937	0.9862433
MCTS1	1.9444233	0.05184442165741909	0.5743119813706493	0.5795238
GRAMD4	1.94284	0.05203550140514667	0.5761286201905593	1.8851665
DOCK8	1.9405091	0.052317846708963285	0.5786522525496308	0.60224986
C3orf38	1.9370538	0.052738767649688024	0.5824451908922862	1.1903498
THOC2	1.9370197	0.052742932796960046	0.5824451908922862	0.49110347
CNOT7	1.9362587	0.05283602607981721	0.5829921452925001	0.5422589
ZMIZ1	1.9359429	0.05287469313410281	0.5829921452925001	0.9378557
SIRT7	1.9354295	0.05293761235029387	0.5833834596261143	1.0973365
PAFAH2	1.9349887	0.05299167254324696	0.5836767909488967	3.138378
IK	1.9265083	0.05404092975314019	0.5940033772193999	0.30588263
NCOR2	1.9240685	0.054345997941141144	0.5961243064518469	0.7382614
SET	1.9219398	0.054613323804479134	0.5987478268028179	0.22165027
RAB11FIP1	1.9191229	0.05496878079891127	0.602334363118003	1.2789617
TAPBPL	1.9183732	0.055063702539800904	0.6027534170453039	1.2089889
VMA21	1.9173146	0.05519797623928752	0.6036019314310573	0.66014004
MAP4	1.9154109	0.05544012507642036	0.6059383454524073	0.6633418
POMC	1.9143817	0.05557139233769859	0.6067494577158682	1.3262398
CLPTM1	1.9119055	0.05588830665006621	0.6092713450231974	0.89199865
TMEM156	1.90905	0.056255643240173736	0.6126478628137507	2.1666648
GALK1	1.9073007	0.05648165372020805	0.6144799452558082	0.81565857
TRPM2	1.9065487	0.056579040895382245	0.6152247550122112	2.045217
PON2	1.9047472	0.05681292681327526	0.6174522945281306	0.7221314
EIF3I	1.9025233	0.05710278032718881	0.6196525687647851	0.3184262
HNRNPH1	1.8986272	0.05761350672401093	0.6248759176506825	0.14121981
ST3GAL5	1.89763	0.05774484951311207	0.6259812458177271	1.5845895
ATF5	1.8952037	0.058065420079368595	0.6288153867963802	1.2007077
ETNK1	1.890851	0.05864423213564607	0.6341149838805573	0.93173647
S100PBP	1.8904989	0.058691265457825034	0.6341789712947684	1.265304
NEMF	1.8903604	0.05870978393339597	0.6341789712947684	0.42136648
P3H2	1.8900923	0.05874562032932307	0.634243958773793	1.481836
SNRNP200	1.8859941	0.05929575722358121	0.6388862514631959	0.6736799
CLK4	1.8844675	0.0595017761944827	0.6403941482157408	0.91182446
C11orf1	1.8843266	0.05952081378517201	0.6403941482157408	1.0444617
NUP210	1.884288	0.05952603465242934	0.6403941482157408	1.1506476
ORAI2	1.8814051	0.05991683114140641	0.6442725386989752	1.2881209
ZEB2-AS1	1.8780179	0.06037871013541679	0.6489109579940271	0.9156563
DUS1L	1.8727998	0.06109604303202736	0.6546860767489546	0.5774239
PDCD10	1.866582	0.06195998612643244	0.663558381129452	0.4765814
NOTCH4	1.8642557	0.06228580309123392	0.6663212532195361	3.658926
SMIM19	1.8623292	0.06255669197101382	0.6682076804733189	0.58294684
PALD1	1.8621453	0.06258261787121404	0.6682076804733189	3.6342826
RASSF7	1.8613048	0.06270115784674654	0.6691374441758415	1.8359051
DDIT4-AS1	1.859192	0.06299992968901465	0.6719887184331256	2.597174
IL6R	1.8588217	0.06305241609109767	0.672001457870183	0.9028334
DMTF1	1.8587217	0.06306659039329608	0.672001457870183	0.89016515
NCOA1	1.8583764	0.06311557643108467	0.672001457870183	0.9024291
GLO1	1.8582923	0.06312750542219313	0.672001457870183	0.8958862
RBM34	1.856759	0.06334545620436835	0.6735237173312748	0.6253893
ASXL1	1.856618	0.06336550652968549	0.6735237173312748	0.57387114
TRAPPC6A	1.8511341	0.06415026209063407	0.6806468206573316	0.5093095
DRD4	1.851041	0.06416365957111053	0.6806468206573316	4.883496
CTDNEP1	1.8500118	0.06431183921636156	0.6815388681080189	0.5553208
TMED4	1.8470587	0.06473864808741857	0.6853789478204606	0.8872791
AC011893.1	1.8443893	0.06512642601778793	0.6891412711305132	6.7770653
KRI1	1.8431625	0.06530528033307098	0.6898119625898789	1.2747768
ARF3	1.841043	0.06561525527099427	0.6925909996817752	0.7593933
GIT2	1.8384737	0.06599263800642366	0.6958836974509791	0.8642489
VEZF1	1.8378739	0.06608098435001768	0.6963367009759219	1.1231478
STAG2	1.8333259	0.06675412050255242	0.7021727937531094	0.38327846
ARHGEF1	1.8284007	0.06748942862042948	0.7095564297221525	0.6147239
TPTEP2	1.8252703	0.06796025176488169	0.7134484673184939	2.592654
APBB1IP	1.8232939	0.06825889455492284	0.7158769370259634	0.9544223
POLR1D	1.8228532	0.06832563537788496	0.7160908943489525	0.2374041
NDUFS3	1.8223283	0.06840517508266594	0.7163513879040975	0.40309998
DDX3Y	1.8210926	0.06859279008949844	0.7179626242192629	0.65393764
ZNF433-AS1	1.8170829	0.06920441827913207	0.7240082500633842	1.4487026
THOC6	1.8164946	0.06929454571249133	0.7242386696604315	0.8566275
PHF11	1.8154427	0.06945590173968451	0.7255685530949655	0.56236434
ARHGAP25	1.8143591	0.06962245932250803	0.7269514419884258	1.2144676
DR1	1.8137776	0.06971198385523358	0.7275290405382547	1.5628133
HDLBP	1.811056	0.07013218746562544	0.7315554169722351	0.39767712
EIF2A	1.8094339	0.07038361301930629	0.7334586307239713	0.39810193
ANKRD39	1.8055538	0.07098806357466839	0.7386717828618503	1.0954267
INPP5D	1.8034979	0.07131005847838416	0.7412534215878364	0.64974666
L3MBTL3	1.8033366	0.0713353705181095	0.7412534215878364	1.5538483
KDM5D	1.8033025	0.07134071907425366	0.7412534215878364	1.8927405
PTPN1	1.8023211	0.07149489858873548	0.7424926748456128	1.2142967
AKR1A1	1.8015056	0.07162323226945945	0.7433039290401876	0.35275334
CCDC82	1.8013806	0.07164291008192132	0.7433039290401876	0.56828135
TMEM138	1.8007172	0.0717474555778088	0.7440256619621723	1.0373629
FAM162A	1.798709	0.07206471850833435	0.7465876755741662	0.57084656
TTC19	1.7976027	0.07223999051825002	0.7480391228493961	0.6070472
AZIN2	1.7970598	0.07232613457295789	0.7485666940302877	3.1969488
PRKRA	1.7964237	0.07242716345091484	0.7486016892509404	1.1386515
HSD17B4	1.7958739	0.07251457432288148	0.7490590001327666	0.55253506
MARK2	1.7945768	0.07272116295525596	0.7501001042169443	0.73512495
TFAM	1.7900083	0.07345258471723931	0.7561776497342512	0.47236192
ZC3H13	1.7896584	0.07350884326993884	0.7563907051322347	0.545924
PHPT1	1.7883681	0.07371664710655584	0.7574296460431577	0.20927763
C1QBP	1.7871526	0.07391281687780693	0.7587122114739747	0.16006806
DHX9	1.7868983	0.07395393816942736	0.758768119115075	0.45325032
SH3BP4	1.7865393	0.07401198036217647	0.7589974977450007	2.660341
TRPT1	1.7852558	0.07421984103737274	0.7603958569479194	1.1676823
PIP5K1A	1.7835656	0.07449428242321182	0.7626733332208031	1.4418641
SLC8A1-AS1	1.7832248	0.0745497136567798	0.7626733332208031	2.1358852
KIF2A	1.7801784	0.07504676758948742	0.7670205189143718	0.3953231
SCARB1	1.778152	0.07537889186206667	0.7696753005349477	2.0593455
LCNL1	1.7768003	0.07560109854222807	0.7712037241700954	4.5155277
KLC4	1.7730724	0.0762167124142943	0.775623567626615	2.794742
PPP1R15A	1.771464	0.07648357508597421	0.7771707802159465	0.21129335
ATP5F1B	1.7691059	0.0768761998186957	0.7794055112768636	0.15140702
XPNPEP1	1.7656801	0.07744952821396726	0.7840428441612897	1.2292714
LINC02245	1.7650123	0.07756170918371211	0.7848049441619281	2.2660303
FLT3	1.764692	0.07761555720214479	0.7849763605004363	1.829173
EP400	1.7642239	0.0776942835138447	0.785399104589336	1.2318934
N4BP2	1.7612752	0.0781918328691892	0.7891596209735745	1.7637041
TCL6	1.7609209	0.0782518050041501	0.7891596209735745	3.1682467
ARHGAP30	1.7576268	0.07881103160152085	0.7940463435020119	0.45332652
ELMO1	1.7558435	0.0791151393175639	0.7959791381954904	0.82384807
AC103591.3	1.7555255	0.07916947524327403	0.7961492051769246	0.4316443
AC139887.2	1.7549961	0.07925997303318295	0.796682592836847	2.0270839
TOX2	1.7525381	0.0796813275673199	0.7997839339449395	4.0988727
IMP3	1.7502936	0.08006766514667554	0.8029038991063848	0.45124054
WDR54	1.7487329	0.08033719881885644	0.8040902972603565	1.1465045
TCF3	1.7437624	0.0812005417953912	0.8111996290958783	0.63065064
KLF16	1.7436942	0.08121243135186304	0.8111996290958783	1.346638
BAIAP2	1.7435465	0.08123819690508349	0.8111996290958783	2.226846
CERNA2	1.7415315	0.08159046107933023	0.8143348271685943	4.801217
PABPC1	1.7377354	0.08225745013827422	0.8201321783951089	0.07999659
RNF4	1.7360134	0.08256146434568837	0.8220972777005833	1.0719038
C11orf80	1.7331556	0.08306802527028452	0.8259812199502952	2.58282
PRPF38B	1.7316562	0.0833347940002093	0.8278597541291226	0.5580504
SPPL2A	1.7308884	0.08347168038033688	0.8284457162899604	0.49514863
ATP5IF1	1.7304363	0.08355235838359958	0.8288596597298411	0.041299954
ZEB1	1.727165	0.08413804252403108	0.833503505562933	1.1226314
CHPF	1.7241821	0.0846749646853456	0.8380417979956332	1.7687579
DCLRE1C	1.7200794	0.08541801299069321	0.844609817898212	1.3549627
FAM174C	1.7130983	0.08669445527159804	0.8552432139014929	0.39575586
EP400P1	1.7124327	0.08681695967256593	0.8556579774215963	1.5080922
ZNF655	1.7121192	0.08687470638311512	0.8558305373147176	0.70912373
AC098613.1	1.710738	0.08712949602904424	0.8571495148204172	5.3717327
MYO15B	1.7083231	0.08757640756164005	0.8611477634898391	1.1251884
KCNA5	1.7064399	0.0879262216536707	0.8641879890720527	5.2710605
UBA5	1.6982502	0.08946055342713907	0.8777258821473053	0.8130385
RUFY3	1.6941997	0.09022735000623912	0.8843527683330414	0.7748601
RNF13	1.6930774	0.09044073265037839	0.8860359017691838	0.7071908
CHAMP1	1.6902809	0.09097422817700532	0.890629281868066	1.1449492
STX5	1.6901809	0.0909933438102077	0.890629281868066	0.6957245
ARL6IP6	1.6877615	0.0914570150422312	0.8947558661146344	0.8515578
NFX1	1.6804465	0.09287047336665709	0.9067300836048862	1.400526
NARS1	1.6796787	0.09301985404430826	0.9070367713847902	0.421801
PBRM1	1.6795061	0.09305346914107915	0.9070367713847902	0.57526755
TSTA3	1.679163	0.09312028595912376	0.9071583719470505	0.62488604
CLASRP	1.6788291	0.09318536977708326	0.9071583719470505	0.89695966
CPT1A	1.6785269	0.09324428658601705	0.9071583719470505	0.7738336
RBBP7	1.6776432	0.0934167787576696	0.9076662710812584	0.37804654
SLC25A28	1.6728793	0.09435105461555068	0.9149366705042177	0.8182052
MGME1	1.6727316	0.09438013329664081	0.9149366705042177	1.3945913
SEMA7A	1.6700056	0.09491826213260303	0.9188969127438934	2.7408714
TBC1D14	1.6688969	0.09513780310459616	0.9197776661145208	1.806407
BID	1.6681587	0.09528423930680582	0.9197776661145208	0.33940005
PPP1CA	1.6675316	0.09540873913416763	0.9197776661145208	0.34604636
ANAPC5	1.6650168	0.09590940134273285	0.9234481924665392	0.37516642
OTUB1	1.6634448	0.09622343846783056	0.9257387050596264	0.49260676
MAPKAPK5-AS1	1.6586604	0.09718422918153083	0.9316902029326046	0.80174017
SLC4A3	1.658565	0.09720346797251633	0.9316902029326046	3.6331422
PTBP3	1.6582947	0.09725799441608605	0.9317929203764569	0.5437922
MORF4L2	1.6569976	0.09751996994853714	0.9338821435549015	0.39883202
CCT8	1.6557572	0.09777100265461003	0.9347348929880039	0.20138723
BICD1	1.655689	0.09778481061160886	0.9347348929880039	2.5257611
POLR2A	1.6498142	0.09898092450650695	0.9432393957397379	0.63765085
MICOS13	1.6479833	0.09935610511219553	0.9449439685258709	0.26483414
LINC00910	1.6467043	0.09961884542281536	0.9467351310535567	1.4610791
CELF2	1.6431786	0.10034600184576772	0.9523690822211663	0.4724368
EPHA2	1.6429377	0.10039581983944372	0.952416901054919	4.9731135
SLC39A4	1.6423697	0.1005133931904672	0.9531071599500879	0.8112828
A1BG-AS1	1.6396369	0.10108069157503015	0.9580593712608361	2.6148987
UTY	1.6389735	0.10121877391890283	0.958940802886924	0.9451967
AKIRIN1	1.6361179	0.10181490638685715	0.9628729408368452	0.6820316
LRRFIP1	1.6335986	0.10234316755905638	0.966678591142157	0.16896905
NAGA	1.6335486	0.10235366906070514	0.966678591142157	0.9600883
ATP6V0A1	1.6333123	0.10240332413056952	0.9667182871429574	1.0934166
ERH	1.632699	0.10253232580666816	0.9675066715093279	0.14646848
GLOD4	1.6317062	0.10274139133969955	0.9687328250586136	0.57945466
PIH1D1	1.6316494	0.10275336185679779	0.9687328250586136	0.4956735
ZMAT2	1.6310179	0.10288654877595875	0.9691293206004724	0.41244212
SLA2	1.630359	0.10302563104883361	0.970009803797097	2.7576454
RUFY1	1.6294049	0.10322732556286235	0.9714424730226631	0.6461828
AL096870.1	1.6292073	0.10326914436523772	0.9714424730226631	0.88170606
COMMD3	1.6268946	0.10375947391627197	0.9747615948432811	0.45326665
SLC44A2	1.625025	0.10415723076758948	0.9759119564739475	0.4982768
RPAIN	1.6247206	0.10422210763560369	0.9760898314846566	0.40468782
ABCD4	1.6225715	0.10468103261860054	0.979094495499127	0.9984801
CLINT1	1.6215743	0.10489454533957042	0.9806602570669554	0.69315606
C19orf25	1.6204656	0.10513229537162923	0.9824511380752118	0.72764736
CEP128	1.6193116	0.10538024339774535	0.9839035982557708	2.3147755
CYBB	1.618337	0.10558999376561477	0.9854293889428962	1.1230077
SYNGR2	1.6176941	0.10572854177792387	0.9862896294187118	0.41904742
SLC2A4RG	1.6141524	0.10649436691212018	0.9916938221777076	0.40246755
PPP1R14A	1.613496	0.10663681386002903	0.9921515284291152	0.37143183
NPIPB4	1.6129802	0.10674880711663386	0.9927592385499281	1.450746
EIF5	1.6117716	0.10701164111742412	0.9937880906424027	0.17407568
SNX4	1.6116263	0.10704329476764053	0.9937880906424027	0.8679346
PAFAH1B1	1.6112332	0.1071288956703476	0.9937880906424027	0.35117748
CHMP4B	1.6111833	0.1071397852199459	0.9937880906424027	0.82994246
AC034236.2	1.610429	0.10730422491612111	0.9948794942201307	4.3750887
COPB1	1.6085731	0.10770973659363106	0.9974301470906288	0.42880723
RREB1	1.6085207	0.1077211700038133	0.9974301470906288	0.6635456
FRMD4B	1.6083118	0.10776691325470239	0.9974301470906288	1.1200341
FIS1	1.6077688	0.10788581814146182	0.9980963314705313	0.2027756
POLR2J3-1	1.6074599	0.10795352585300065	0.9982884962467264	1.0032532
KIAA0930	1.6070147	0.10805116378223856	0.998757150145342	0.6724022
OXLD1	1.6049291	0.10850939870225307	0.9999274963730166	0.6296072
USP7	1.6047292	0.1085534060049549	0.9999274963730166	0.78528076
FRG1CP	1.6007968	0.10942192375841127	0.9999274963730166	0.95544815
ARL6IP1	1.5924164	0.11129118026381118	0.9999274963730166	0.41806254
NUMA1	1.5924096	0.11129271058845966	0.9999274963730166	0.59844464
CD47	1.5897721	0.11188619418935829	0.9999274963730166	0.2966359
LDLRAD4	1.5861009	0.11271641863687727	0.9999274963730166	1.3954521
TOR1AIP1	1.5818822	0.11367644535676208	0.9999274963730166	0.5465767
VOPP1	1.5805897	0.11397189076299687	0.9999274963730166	0.9340618
AC022966.1	1.5747377	0.11531701417311194	0.9999274963730166	0.8648533
RELT	1.5740153	0.11548392804855974	0.9999274963730166	1.2305654
AUTS2	1.5714527	0.11607753232980642	0.9999274963730166	1.1483525
VRK3	1.5709257	0.11619991794048494	0.9999274963730166	0.7313352
RNU4ATAC	1.5699556	0.11642543578827338	0.9999274963730166	0.5968773
RB1	1.5697012	0.11648464489736983	0.9999274963730166	0.55398154
XIAP	1.5693809	0.11655921856847966	0.9999274963730166	0.93988407
ASCC1	1.5687357	0.1167095375306014	0.9999274963730166	0.78676224
ARID4B	1.5680474	0.11687008087749869	0.9999274963730166	0.38382435
YWHAB	1.5664662	0.1172395104151922	0.9999274963730166	0.10757851
DCUN1D1	1.5652213	0.11753102766216693	0.9999274963730166	0.8678612
LYPLA1	1.5631108	0.11802652321604751	0.9999274963730166	0.39498076
UBALD2	1.5627724	0.11810614679065135	0.9999274963730166	0.40957704
BPTF	1.5622499	0.1182291383797782	0.9999274963730166	0.58966607
ZFC3H1	1.5614184	0.11842506252719952	0.9999274963730166	0.6133383
DPYSL2	1.5596079	0.11885258695292701	0.9999274963730166	0.5805823
CAPZA1	1.5596033	0.11885366130695815	0.9999274963730166	0.27008298
XRCC5	1.5548985	0.11997024625217265	0.9999274963730166	0.18149579
FAAH	1.5544714	0.12007201229316936	0.9999274963730166	1.4411856
ATAD2B	1.5540534	0.12017167854194712	0.9999274963730166	0.8287118
RAD23A	1.5527654	0.12047920963882754	0.9999274963730166	0.3594
AC004151.1	1.5504073	0.12104379891376445	0.9999274963730166	0.52719826
NSD1	1.5482401	0.12156452243195569	0.9999274963730166	0.46995193
MAF1	1.5475744	0.12172480229405613	0.9999274963730166	0.33005524
STARD7	1.5469633	0.12187209887489225	0.9999274963730166	0.5690966
FAM177A1	1.5467452	0.12192469941067283	0.9999274963730166	0.42115012
ZNF511	1.5439532	0.12259966492756524	0.9999274963730166	0.47493833
ENTPD4	1.5435125	0.12270647580046254	0.9999274963730166	1.355546
BRMS1	1.5417724	0.12312892392254447	0.9999274963730166	0.6743845
HADH	1.5405524	0.12342575540180888	0.9999274963730166	0.7294823
CCDC32	1.5384715	0.12393337137735728	0.9999274963730166	0.9342465
ATP9B	1.5380467	0.12403720036988881	0.9999274963730166	0.9149075
SEC16A	1.5367655	0.12435076415298592	0.9999274963730166	1.2237543
LINC00877	1.5357614	0.12459693222230178	0.9999274963730166	1.3873538
KCNK10	1.5356023	0.12463595295397524	0.9999274963730166	4.934769
GOSR1	1.534889	0.12481110607848851	0.9999274963730166	0.6226162
GNB4	1.5347686	0.12484068906428793	0.9999274963730166	0.73828685
KIF17	1.5316176	0.12561681560285215	0.9999274963730166	3.0050597
ABHD12	1.5276966	0.12658788156593123	0.9999274963730166	1.1603104
NCBP2AS2	1.5270424	0.12675048086284538	0.9999274963730166	0.5201062
SNHG8	1.5257998	0.12705975419213258	0.9999274963730166	0.08084234
COMMD10	1.5255044	0.12713334237945423	0.9999274963730166	0.86850625
CUTC	1.5225194	0.12787901210802963	0.9999274963730166	0.79085153
PRADC1	1.5216515	0.12809642663655557	0.9999274963730166	1.0613513
PDCD2	1.5182257	0.1289575094202976	0.9999274963730166	0.5652414
SDR39U1	1.5182166	0.12895979942471833	0.9999274963730166	0.8264934
PCBP2	1.5163538	0.12942991777419002	0.9999274963730166	0.1363005
TXNDC5	1.5163152	0.12943967819344335	0.9999274963730166	1.4123487
ZFY	1.5152997	0.12969652496811182	0.9999274963730166	1.4214213
YPEL3	1.5123692	0.1304399796168952	0.9999274963730166	0.27321166
SCAMP4	1.5111992	0.1307377070515882	0.9999274963730166	1.1276637
MAX	1.5096158	0.13114148992118083	0.9999274963730166	0.32811764
DPPA4	1.5092796	0.13122735294365184	0.9999274963730166	1.3944234
PAPOLA	1.5092751	0.13122851355319085	0.9999274963730166	0.23110928
HSPB11	1.5089887	0.13130164800029864	0.9999274963730166	0.42643762
UTP6	1.5087526	0.13136203674290733	0.9999274963730166	0.7350709
ZNF880	1.5077666	0.13161427605145706	0.9999274963730166	1.5268071
CEP57	1.5063945	0.13196594336020495	0.9999274963730166	0.4299904
PIK3R5	1.5055834	0.13217414178611012	0.9999274963730166	1.4618417
RAB5A	1.5052745	0.13225352237331653	0.9999274963730166	0.68715394
UBXN1	1.5030005	0.1328389235672361	0.9999274963730166	0.18632163
COPG1	1.5012671	0.13328648434876075	0.9999274963730166	1.0053946
ZC3H8	1.5007674	0.13341574854301386	0.9999274963730166	0.9061502
EDEM1	1.5002449	0.13355099208862795	0.9999274963730166	0.9235807
RINL	1.4998972	0.1336410171853262	0.9999274963730166	1.5128648
ATP6V1H	1.4979753	0.13413965083125326	0.9999274963730166	0.8061744
HERC1	1.4972326	0.13433277021394938	0.9999274963730166	0.7919887
SLC9A7	1.4969372	0.13440960519959014	0.9999274963730166	2.5698307
SPINT2	1.496501	0.13452314670981919	0.9999274963730166	1.0955628
CEP164	1.4942293	0.13511570796003097	0.9999274963730166	0.74526924
MARCHF7	1.4937749	0.13523446187379448	0.9999274963730166	0.37796682
ADPGK	1.4936635	0.13526356887783966	0.9999274963730166	0.57973266
TLE5	1.492246	0.13563466108801372	0.9999274963730166	1.5427034
RDH14	1.488777	0.13654608281583122	0.9999274963730166	0.6783526
ATP11B	1.4870232	0.1370086622890333	0.9999274963730166	0.91026956
SLC12A9	1.4858624	0.13731551584596421	0.9999274963730166	0.99055946
SCNM1	1.4855852	0.13738885469844936	0.9999274963730166	0.45898256
DHPS	1.4852922	0.13746643436946004	0.9999274963730166	0.6152569
GNPTAB	1.4843767	0.13770901327992846	0.9999274963730166	0.7452838
PHF14	1.4790585	0.1391246694969349	0.9999274963730166	0.6058073
CFAP97	1.4789358	0.13915745625833512	0.9999274963730166	0.48591268
CDC123	1.478761	0.13920421804087202	0.9999274963730166	0.40968138
SLC16A7	1.4764142	0.13983272514992268	0.9999274963730166	1.333158
SHTN1	1.4763438	0.13985162014051417	0.9999274963730166	1.1985208
SAFB	1.4758122	0.13999431023647166	0.9999274963730166	0.39648494
SLC30A5	1.4748126	0.14026291970214236	0.9999274963730166	0.97096586
NDUFB4	1.4731361	0.14071434092045518	0.9999274963730166	0.15928191
FBL	1.4724954	0.14088712989661573	0.9999274963730166	0.18502511
NUB1	1.4689652	0.14184223503815	0.9999274963730166	0.39297155
STK17B	1.4683042	0.1420216383796636	0.9999274963730166	0.18783809
IQCE	1.468002	0.14210369172700868	0.9999274963730166	1.6392728
SYMPK	1.4678248	0.14215183017300764	0.9999274963730166	0.7369542
PLXNB2	1.4676498	0.14219936374175093	0.9999274963730166	0.59277856
ZNF556	1.4676157	0.14220862494817157	0.9999274963730166	7.1252813
MRPL20	1.4670614	0.14235933896054614	0.9999274963730166	0.21108922
RASSF2	1.4637288	0.14326806258502095	0.9999274963730166	0.9044789
SLC7A11	1.4632494	0.14339913042589036	0.9999274963730166	6.639816
SUGT1	1.46282	0.14351661050380632	0.9999274963730166	0.37614298
ATP8A1	1.4625839	0.1435812871063261	0.9999274963730166	2.4734237
C5orf64	1.4611095	0.1439853991295554	0.9999274963730166	4.3986425
CLPTM1L	1.4594988	0.14442786736830687	0.9999274963730166	0.48592624
OIP5-AS1	1.4593194	0.14447723364636167	0.9999274963730166	0.55747896
LRCH4	1.458656	0.14465981364919073	0.9999274963730166	0.699825
RASSF8	1.4577065	0.14492148580450154	0.9999274963730166	1.4442394
ZSWIM8	1.457536	0.144968474894537	0.9999274963730166	0.9921357
GGA3	1.4572021	0.14506060736635254	0.9999274963730166	1.0207522
YPEL1	1.4570112	0.14511327462690732	0.9999274963730166	2.559359
CSK	1.4560094	0.14539001807192134	0.9999274963730166	0.31250736
UBA2	1.4559027	0.1454195360871973	0.9999274963730166	0.40542373
DAPK1	1.4543124	0.14585970943829032	0.9999274963730166	0.928065
ZGPAT	1.4541216	0.1459125987033242	0.9999274963730166	0.87395275
HIBCH	1.452879	0.14625736765753208	0.9999274963730166	0.90855134
RECQL5	1.4490578	0.14732142226167536	0.9999274963730166	2.373431
SORL1	1.448683	0.14742612128863666	0.9999274963730166	0.58492446
SAMD12	1.4481196	0.1475835940787371	0.9999274963730166	3.5057647
TOR3A	1.447236	0.14783085670378204	0.9999274963730166	0.68082565
TLK2	1.4462795	0.14809881625742077	0.9999274963730166	0.5741918
CCDC88B	1.4455775	0.1482957256649874	0.9999274963730166	0.8837319
TMEM50B	1.4432058	0.14896249119874988	0.9999274963730166	0.5708386
COX8A	1.4430673	0.14900152037314077	0.9999274963730166	0.07733389
IP6K1	1.4430037	0.14901943801772902	0.9999274963730166	0.93147326
PREX1	1.4429196	0.14904311742787207	0.9999274963730166	0.9566363
NECTIN1	1.439746	0.14993927819811828	0.9999274963730166	1.8817792
IMP4	1.4364928	0.15086215082688165	0.9999274963730166	0.51312673
RMDN3	1.4342234	0.1515085296154514	0.9999274963730166	0.9475942
NOL7	1.4330057	0.15185620388407328	0.9999274963730166	0.19577461
MAPKAP1	1.4325627	0.1519828404617327	0.9999274963730166	0.56178963
NUDT16L1	1.4309725	0.15243809574785225	0.9999274963730166	0.6215789
VPS41	1.428126	0.15325559329823057	0.9999274963730166	0.7956357
SF3B1	1.4268198	0.1536318560995338	0.9999274963730166	0.2709332
RELL2	1.4266812	0.15367181384595402	0.9999274963730166	2.966417
TBL1XR1	1.4255248	0.15400553984756005	0.9999274963730166	0.37488177
CATSPER2	1.4244412	0.15431878475460178	0.9999274963730166	1.5012766
CRTC3	1.4243186	0.1543542769255503	0.9999274963730166	1.1028271
HCCS	1.4241663	0.1543983221294042	0.9999274963730166	1.1365494
ATP6V0B	1.4205134	0.15545827402029536	0.9999274963730166	0.088694744
NUP160	1.4197978	0.15566655933598028	0.9999274963730166	0.9950969
PPCS	1.4197433	0.15568243737231932	0.9999274963730166	0.34763
GPS2	1.4174284	0.1563577269094625	0.9999274963730166	0.5337904
YTHDF2	1.4174216	0.15635971827913708	0.9999274963730166	0.3210019
ATP5F1C	1.4154224	0.1569446842094853	0.9999274963730166	0.11163226
XRN1	1.4151862	0.15701392602439015	0.9999274963730166	0.4957479
CYSTM1	1.4150475	0.15705454978542663	0.9999274963730166	0.5753766
DTX2	1.413998	0.15736248354840665	0.9999274963730166	1.644804
ERO1B	1.4115922	0.15807005787474282	0.9999274963730166	1.2063575
ITGB1BP1	1.4086595	0.15893589988095858	0.9999274963730166	0.3936696
PRDX5	1.4079393	0.15914905185500727	0.9999274963730166	0.14188199
BIK	1.4067852	0.15949108388327893	0.9999274963730166	3.1624417
AC034102.1	1.4060969	0.15969535573906812	0.9999274963730166	1.0411719
LAMTOR1	1.4055607	0.15985459559774018	0.9999274963730166	0.12544315
ACTG1	1.4053199	0.15992615764985751	0.9999274963730166	0.06275539
ACSL3	1.4050496	0.16000652503949442	0.9999274963730166	0.49525532
MFF	1.4034708	0.1604765076757214	0.9999274963730166	0.43828014
EXOC6	1.4028028	0.16067563420991626	0.9999274963730166	0.969076
FBXW4	1.4027393	0.1606946083751566	0.9999274963730166	1.117473
ZNF217	1.4015762	0.1610418631493985	0.9999274963730166	0.74800533
TRIM5	1.4012694	0.16113351883626437	0.9999274963730166	1.0621321
ATP5PF	1.40089	0.16124695482868134	0.9999274963730166	0.10697433
PIP4P1	1.4005947	0.161335300037999	0.9999274963730166	0.91124135
SEC31A	1.39579	0.16277774842763537	0.9999274963730166	0.24274257
DLST	1.3955582	0.16284755839676335	0.9999274963730166	0.7412078
NAP1L1	1.3949971	0.1630167015727415	0.9999274963730166	0.030549124
C1orf162	1.393316	0.1635242393398041	0.9999274963730166	0.088085696
TMEM256	1.390683	0.16432154557786904	0.9999274963730166	0.21216816
TMEM41B	1.3884408	0.1650028342475678	0.9999274963730166	0.76697356
CCDC47	1.3869233	0.16546513449364586	0.9999274963730166	0.2725428
ISCA2	1.3857647	0.16581874391776552	0.9999274963730166	0.55268264
ETV2	1.3857307	0.1658291527942618	0.9999274963730166	2.1340153
WDR74	1.3854717	0.16590827631940652	0.9999274963730166	0.61515886
PLXNA4	1.3846766	0.1661513768596634	0.9999274963730166	2.95473
ABCA2	1.3837816	0.1664253590263527	0.9999274963730166	1.7697982
PNKP	1.3818846	0.16700712911511295	0.9999274963730166	0.52204704
HNRNPUL1	1.3809941	0.16728077411529496	0.9999274963730166	0.26201862
AC099778.1	1.380617	0.16739675587668967	0.9999274963730166	2.4287517
RPH3AL	1.3803126	0.16749042376535872	0.9999274963730166	3.3383482
SLC41A2	1.3785542	0.16803223131006995	0.9999274963730166	1.7263334
COA5	1.378477	0.16805606177955068	0.9999274963730166	0.52763283
TBC1D9B	1.3751988	0.1690697956895446	0.9999274963730166	0.8462217
EDEM2	1.3750944	0.16910218681262856	0.9999274963730166	0.81083393
ZNF33A	1.3727022	0.1698449353780137	0.9999274963730166	0.7414512
AHSA2P	1.3716708	0.1701659242371225	0.9999274963730166	0.77755624
NDUFS2	1.3699875	0.1706908052256848	0.9999274963730166	0.30692053
HUWE1	1.3690561	0.17098174589585025	0.9999274963730166	0.863058
SNAPIN	1.3682451	0.17123537950595957	0.9999274963730166	0.5864712
EIF3M	1.3652078	0.17218776560026972	0.9999274963730166	0.16516545
H2BC15	1.3652078	0.17218776560026972	0.9999274963730166	1.1027657
FBRS	1.3648261	0.17230771686459156	0.9999274963730166	0.6567726
POLG	1.3631972	0.17282035446068456	0.9999274963730166	1.1818897
PPP3R1	1.3622704	0.17311257319726603	0.9999274963730166	1.0533017
DTX4	1.3607574	0.173590370628543	0.9999274963730166	2.5427094
SPOP	1.3606983	0.17360904334636384	0.9999274963730166	0.41930997
PLEKHM1	1.360135	0.17378722778527778	0.9999274963730166	0.8609134
ARHGAP1	1.3600281	0.1738210120052187	0.9999274963730166	0.62124157
TMEM39B	1.359994	0.17383179523583736	0.9999274963730166	1.1535939
ADCK2	1.358999	0.1741468859607539	0.9999274963730166	1.5058694
NFKBIL1	1.3585765	0.17428082056953298	0.9999274963730166	0.911147
ALKBH7	1.3583335	0.17435790381955663	0.9999274963730166	0.14059965
RNU5B-1	1.3567728	0.174853428077416	0.9999274963730166	1.183368
HIRIP3	1.3566728	0.17488520049139022	0.9999274963730166	1.2159175
STX8	1.3565683	0.17491842171315164	0.9999274963730166	0.4761204
PTPRC	1.3564001	0.1749718744309262	0.9999274963730166	-0.025161605
PSMB3	1.3562094	0.17503256526108446	0.9999274963730166	0.13236985
LINC02256	1.3560231	0.1750918262237554	0.9999274963730166	0.86652607
ETV3	1.3556914	0.17519737670524738	0.9999274963730166	1.4539428
NUTM2A-AS1	1.3551143	0.17538111876380325	0.9999274963730166	0.47265238
CLECL1	1.3551098	0.17538256612192082	0.9999274963730166	1.8978544
ZNF688	1.3530948	0.17602534817885196	0.9999274963730166	0.7767249
PRH1	1.350421	0.17688099424387604	0.9999274963730166	0.6562955
AL645941.3	1.3501574	0.1769654904707456	0.9999274963730166	1.8626978
NADSYN1	1.3499416	0.17703471236299573	0.9999274963730166	0.8458332
ACADM	1.3459002	0.17833471166869896	0.9999274963730166	0.497532
DDX27	1.3457662	0.17837794713473232	0.9999274963730166	0.76451856
SEPTIN7	1.3452005	0.17856050138144575	0.9999274963730166	0.1189793
SLC25A19	1.343658	0.1790590162304414	0.9999274963730166	1.5464028
FKBP3	1.3435125	0.17910605769946453	0.9999274963730166	0.44928098
RAB14	1.3428606	0.17931712230513042	0.9999274963730166	0.91601896
COX6B1	1.3415362	0.17974643955281333	0.9999274963730166	0.07633463
AC124319.1	1.3405843	0.18005545980748994	0.9999274963730166	0.7935577
YBX1	1.3375015	0.18105898186353786	0.9999274963730166	0.019199003
P2RX1	1.3342507	0.18212171976477842	0.9999274963730166	1.5053109
NKAPD1	1.3335146	0.18236298073590473	0.9999274963730166	0.6190299
POMGNT1	1.3289052	0.18387923187764654	0.9999274963730166	1.2344946
DACH1	1.3255385	0.18499260143569973	0.9999274963730166	2.5829425
TTC39C	1.3253931	0.18504079427225917	0.9999274963730166	0.9049509
DLGAP4	1.3224694	0.18601189443524435	0.9999274963730166	0.7824747
PLEKHA3	1.3223649	0.1860466731300453	0.9999274963730166	0.4764552
PSMA3-AS1	1.3218015	0.18623425847240316	0.9999274963730166	0.40013435
TADA3	1.321747	0.18625241930818126	0.9999274963730166	0.52787375
RF00012-39	1.3205225	0.18666062624647028	0.9999274963730166	0.7147823
TXLNGY	1.3203385	0.1867220279718359	0.9999274963730166	0.9294729
SREK1IP1	1.318905	0.18720086593814966	0.9999274963730166	0.3763304
RAP1GAP2	1.3182849	0.1874083143404094	0.9999274963730166	1.4618767
INTS6	1.3153384	0.18839620317384242	0.9999274963730166	0.5966888
FGFR1OP2	1.3136755	0.1889554402573087	0.9999274963730166	0.44310164
TMEM129	1.3119694	0.1895304641042287	0.9999274963730166	1.0504719
UTRN	1.3108472	0.18990941130044559	0.9999274963730166	0.6760053
USP24	1.3100929	0.19016440179443417	0.9999274963730166	1.7088842
ARL8A	1.3092002	0.19046656876849877	0.9999274963730166	0.68135345
KLHL6	1.3069715	0.19122237532305042	0.9999274963730166	2.0135963
ASPH	1.3065308	0.1913721026722388	0.9999274963730166	0.49916017
SNRNP27	1.3063309	0.19144004866333997	0.9999274963730166	0.7530593
AC060780.1	1.3043795	0.1921042265870847	0.9999274963730166	1.6475147
CSNK1G3	1.3030392	0.1925613944917528	0.9999274963730166	0.7112876
SUPT3H	1.3008128	0.19332252451122345	0.9999274963730166	1.667564
RIOX2	1.2987115	0.19404296308816849	0.9999274963730166	1.3641478
SERPINB8	1.2984252	0.19414125081376554	0.9999274963730166	0.64925236
NOP10	1.2982731	0.19419352980096471	0.9999274963730166	0.12986295
UHRF2	1.2974416	0.19447929591663715	0.9999274963730166	0.7198315
SMG1P1	1.2972372	0.19454961351632738	0.9999274963730166	1.1301723
ZRANB2	1.2945496	0.19547563402204027	0.9999274963730166	0.44515535
CYSLTR1	1.293809	0.19573138505427534	0.9999274963730166	2.51382
PRCC	1.2933433	0.19589233564528108	0.9999274963730166	0.8284284
SNORD3B-1	1.2908309	0.196762357207937	0.9999274963730166	1.3193448
CCT7	1.2897654	0.1971321435484239	0.9999274963730166	0.2182747
ZMAT1	1.2880479	0.19772928764249775	0.9999274963730166	1.3597724
MED11	1.2880229	0.1977379860050692	0.9999274963730166	0.83800435
ATPAF2	1.2878207	0.19780837396281448	0.9999274963730166	0.92419124
ALG2	1.2876276	0.19787561552949984	0.9999274963730166	1.14454
EMC6	1.2863214	0.19833092417605214	0.9999274963730166	0.34225473
CLCN5	1.2861533	0.19838957601924212	0.9999274963730166	2.945267
LINC00158	1.2858694	0.19848867888521327	0.9999274963730166	5.57894
CREM	1.2847903	0.19886559990614716	0.9999274963730166	0.7111173
LILRB1	1.2845676	0.19894342972767864	0.9999274963730166	1.7886522
LINC01089	1.2839247	0.1991683081633716	0.9999274963730166	0.9421026
CYB561D2	1.2822413	0.19975800397869548	0.9999274963730166	0.6435846
BECN1	1.2821777	0.19978031165881438	0.9999274963730166	0.8732369
LSM5	1.2820868	0.19981218292945835	0.9999274963730166	0.15895812
AMN	1.2818074	0.19991021035250123	0.9999274963730166	3.3568754
ADH5	1.280249	0.20045757662879038	0.9999274963730166	0.24985282
HHAT	1.2785383	0.201059661448584	0.9999274963730166	2.2332387
SEC61A2	1.2780908	0.20121739650153736	0.9999274963730166	2.2005622
DCP1A	1.2777796	0.20132714362445658	0.9999274963730166	0.8013001
SMG7	1.2770526	0.20158365734425365	0.9999274963730166	0.6273785
SMIM15	1.276094	0.20192229909079873	0.9999274963730166	0.79857254
SNRNP35	1.2756124	0.2020925788544189	0.9999274963730166	0.6957266
COQ4	1.2753829	0.2021737395048252	0.9999274963730166	0.55109113
AC004156.1	1.2748127	0.20237553864697833	0.9999274963730166	0.5286934
NBPF10	1.2730135	0.20301325354250888	0.9999274963730166	0.7129656
SH3TC1	1.2728068	0.2030866199776329	0.9999274963730166	0.8573295
TSR3	1.2720139	0.2033681713792571	0.9999274963730166	0.5298067
LUC7L	1.2711438	0.20367747881233855	0.9999274963730166	0.50081253
EMC7	1.2701329	0.20403728678939514	0.9999274963730166	0.32167903
SLC35A3	1.2693901	0.20430197966638752	0.9999274963730166	0.885197
BBX	1.2690084	0.20443806576609524	0.9999274963730166	0.30800876
Z99127.4	1.2687109	0.20454422626708202	0.9999274963730166	1.4625696
PRMT2	1.2686495	0.20456611165844707	0.9999274963730166	0.5553528
KHDC4	1.267634	0.20492868400281694	0.9999274963730166	1.1995883
NDUFS6	1.2660779	0.2054852100993776	0.9999274963730166	0.16714667
MRPL55	1.2659643	0.2055258754127266	0.9999274963730166	0.32770944
CYFIP2	1.2613868	0.20716955764291234	0.9999274963730166	1.4086523
MREG	1.2599759	0.20767803951569008	0.9999274963730166	3.151934
PTEN	1.2580518	0.20837303126051154	0.9999274963730166	0.45420885
C1D	1.2567137	0.2088573182447263	0.9999274963730166	0.46986738
AC093525.4	1.2556801	0.20923198585374192	0.9999274963730166	2.471122
COX17	1.2548122	0.20954691770979073	0.9999274963730166	0.1948475
ZMIZ2	1.2546033	0.20962281643746494	0.9999274963730166	1.2296796
KDM2B	1.2535583	0.21000260867730436	0.9999274963730166	1.0400572
MDN1	1.2534765	0.21003235255058084	0.9999274963730166	1.7967849
KMT2E	1.2523043	0.21045901653897225	0.9999274963730166	0.1884848
DPP9	1.2505391	0.21110267576739694	0.9999274963730166	0.83385783
RBCK1	1.2503005	0.21118976581275017	0.9999274963730166	0.31436577
IDH3G	1.2488126	0.2117336283860609	0.9999274963730166	0.32715568
BTAF1	1.2486854	0.21178017348995715	0.9999274963730166	1.3445685
EMILIN2	1.2480243	0.21202216085615733	0.9999274963730166	0.6179408
FBXL15	1.2474223	0.21224270111747068	0.9999274963730166	0.5232647
AP1S3	1.2468771	0.21244257866451133	0.9999274963730166	2.685975
KMO	1.2444485	0.21333451812334003	0.9999274963730166	2.98141
CHD3	1.2439737	0.2135092164566108	0.9999274963730166	0.58645415
CHCHD7	1.2439125	0.21353179266849187	0.9999274963730166	0.5177009
CARHSP1	1.2425131	0.21404733282031918	0.9999274963730166	0.44236103
NUDT17	1.2422563	0.2141420016788469	0.9999274963730166	3.4448361
FASTK	1.2420927	0.21420233740792882	0.9999274963730166	0.69762444
PRKRIP1	1.2398573	0.2150281547275651	0.9999274963730166	0.66225165
ANAPC11	1.2371631	0.21602654583427672	0.9999274963730166	0.14979878
PPP4R3A	1.2367905	0.21616486554786274	0.9999274963730166	0.36459783
RP9	1.2363338	0.2163344784864255	0.9999274963730166	0.5979376
ANAPC15	1.2359909	0.21646196215505054	0.9999274963730166	0.37199393
NUS1P1	1.235248	0.2167382213768243	0.9999274963730166	1.3751405
SCAI	1.2340121	0.21719837053608682	0.9999274963730166	1.397388
RSU1	1.2337873	0.21728218643655528	0.9999274963730166	0.73997265
GPBP1L1	1.2334578	0.21740498908303707	0.9999274963730166	0.49439475
EZH1	1.2328513	0.21763124589469485	0.9999274963730166	0.7050478
ERP29P1	1.2298231	0.2187633678860662	0.9999274963730166	1.8676317
SERINC3	1.2277285	0.21954889696504198	0.9999274963730166	0.72281694
AMZ2	1.2270379	0.21980834334951893	0.9999274963730166	0.88247067
SNHG15	1.226813	0.21989288158714204	0.9999274963730166	0.5443352
RHOF	1.2256658	0.22032447504347596	0.9999274963730166	1.5526959
AL138756.1	1.2250569	0.2205537653448456	0.9999274963730166	1.9662848
IQCB1	1.2243572	0.2208174893684962	0.9999274963730166	0.95749825
MRTFA	1.2228465	0.22138766442301017	0.9999274963730166	0.9382075
ERGIC2	1.2197297	0.22256735776757497	0.9999274963730166	0.5567915
C18orf25	1.2196275	0.22260612640847355	0.9999274963730166	1.3369993
LINC01184	1.2177806	0.22330737930134792	0.9999274963730166	1.4095327
CLCN3	1.2168423	0.22366421704805606	0.9999274963730166	0.90262836
RAB18	1.2158473	0.22404310053168686	0.9999274963730166	0.63351935
TMEM134	1.2122352	0.22542235529719246	0.9999274963730166	0.5052078
ABTB1	1.2116628	0.22564150960222507	0.9999274963730166	0.5340245
HEBP2	1.2111766	0.225827736230081	0.9999274963730166	0.12788232
TMUB1	1.210386	0.2261308062756664	0.9999274963730166	0.625004
TEP1	1.2078007	0.2271239063764252	0.9999274963730166	1.679354
HIP1	1.2043341	0.22846047817786452	0.9999274963730166	0.6257491
FAM3A	1.2041365	0.22853684695763765	0.9999274963730166	0.77678096
DAPK2	1.2038957	0.22862991854180736	0.9999274963730166	0.8007727
CHMP5	1.2037934	0.22866943822309838	0.9999274963730166	1.1403664
GOLGA2	1.2025462	0.2291519700134359	0.9999274963730166	0.3528207
PRPF8	1.2015444	0.2295401020483574	0.9999274963730166	0.4241778
COLGALT1	1.2014444	0.2295788528859527	0.9999274963730166	0.65521705
BMF	1.2009833	0.22975769542925928	0.9999274963730166	2.4247751
DCAF6	1.2004699	0.22995691747563685	0.9999274963730166	0.99602634
MRPS5	1.2001995	0.23006186694217035	0.9999274963730166	0.40423295
SLC2A8	1.1979141	0.23095044807170584	0.9999274963730166	1.9488063
AC068631.2	1.1973575	0.23116722081670038	0.9999274963730166	1.2885842
CFAP410	1.1962103	0.23161449406075785	0.9999274963730166	0.7640984
UFSP2	1.1944451	0.2323038745332895	0.9999274963730166	0.7845207
APH1A	1.193959	0.23249399802712467	0.9999274963730166	0.32609907
CAAP1	1.193541	0.23265755695484658	0.9999274963730166	0.8390897
ADCY7	1.1933184	0.23274470317371254	0.9999274963730166	0.7643703
ARMC10	1.1921939	0.23318523439705008	0.9999274963730166	0.6237938
KF456478.1	1.1894314	0.23426993788122774	0.9999274963730166	6.310526
KMT5B	1.1886749	0.2345676050247395	0.9999274963730166	0.5900807
ATP6V1E1	1.1872143	0.23514313754764526	0.9999274963730166	0.3289263
FCRLA	1.187196	0.23515030442952567	0.9999274963730166	2.2718601
IRAK1	1.1838702	0.23646444823011192	0.9999274963730166	0.49860862
SEC63	1.1817757	0.2372947318853622	0.9999274963730166	0.30856144
RHOQP1	1.1790063	0.23839563034688527	0.9999274963730166	2.3029282
CD7	1.1783521	0.23865625342591346	0.9999274963730166	0.5951636
MFSD14C	1.1773117	0.2390711305311085	0.9999274963730166	0.81669134
FAM207A	1.1765302	0.2393830756790405	0.9999274963730166	0.46149155
ATXN2L	1.17596	0.23961086788328734	0.9999274963730166	0.9936403
SLC12A2	1.1748013	0.24007418326996688	0.9999274963730166	1.5862598
DCTN3	1.1747082	0.24011145759517927	0.9999274963730166	0.18550202
ARMCX3	1.1738586	0.24045166047764455	0.9999274963730166	0.6301204
BCAT2	1.172357	0.24105375837299992	0.9999274963730166	1.169354
RAB7A	1.1714597	0.2414140660602001	0.9999274963730166	0.17188556
MRPL28	1.1711735	0.24152907936689405	0.9999274963730166	0.30684316
ACAP2	1.1706827	0.24172633475576177	0.9999274963730166	0.20745648
BIRC6	1.1698626	0.24205625998358848	0.9999274963730166	0.55070937
CPED1	1.1693151	0.24227669104715566	0.9999274963730166	1.5269374
PPCDC	1.167032	0.24319743803632898	0.9999274963730166	1.0190892
STN1	1.1666504	0.24335159355113667	0.9999274963730166	1.0126036
MVP	1.166271	0.24350489951574805	0.9999274963730166	0.49662888
ACSF3	1.1661915	0.24353703810784366	0.9999274963730166	0.88038635
CYB561A3	1.1655327	0.24380344395256826	0.9999274963730166	3.1310976
GMPPA	1.1642764	0.24431201955184934	0.9999274963730166	0.9082268
ELMO2	1.164165	0.2443571191109969	0.9999274963730166	1.5742265
C15orf61	1.163813	0.24449981946939414	0.9999274963730166	0.5593501
TRA2B	1.1634336	0.24465363305638377	0.9999274963730166	0.08262328
SNHG9	1.1626612	0.24496699633660446	0.9999274963730166	0.2968029
PCM1	1.161305	0.2455179066089931	0.9999274963730166	0.18506691
RN7SL2	1.1609733	0.24565276722046736	0.9999274963730166	0.9458752
PSMB8-AS1	1.1606029	0.24580339214411973	0.9999274963730166	0.5482066
RNU11	1.1596853	0.2461769993041405	0.9999274963730166	1.4712255
AKAP8	1.1553394	0.24795148878086948	0.9999274963730166	0.7481652
ARL4C	1.1543511	0.24835623870784906	0.9999274963730166	0.88149434
AL133342.1	1.1532425	0.24881085283760218	0.9999274963730166	1.7558974
SMG1P4	1.1524543	0.24913446709129383	0.9999274963730166	1.1831574
RECQL	1.1520725	0.24929125055482304	0.9999274963730166	0.6420432
TNFRSF17	1.1513752	0.2495779318013086	0.9999274963730166	1.755671
LAGE3	1.1509277	0.24976201468503711	0.9999274963730166	0.33555096
INO80C	1.150839	0.24979846873544564	0.9999274963730166	0.838716
RHBDD1	1.1507527	0.24983399164198972	0.9999274963730166	1.7325183
NIPBL	1.1497167	0.2502605418093644	0.9999274963730166	0.39917645
MRNIP	1.1492943	0.2504346753288018	0.9999274963730166	1.3248186
GTSF1	1.1490898	0.2505189638487383	0.9999274963730166	2.0577042
DCTN1	1.148833	0.25062482081203374	0.9999274963730166	0.7478611
CYP46A1	1.1480266	0.2509575834349972	0.9999274963730166	4.518242
U47924.2	1.1472429	0.25128126779126025	0.9999274963730166	0.81969994
ISCU	1.1455255	0.25199157691925356	0.9999274963730166	0.18677367
AC005540.1	1.1450256	0.2521985433649615	0.9999274963730166	1.6465114
JAK1	1.1447735	0.2523030123107386	0.9999274963730166	0.3911884
PLEKHA2	1.1439352	0.2526505177720467	0.9999274963730166	0.51361895
NKIRAS2	1.1413273	0.25373377828473453	0.9999274963730166	0.66759825
ELP2	1.1412205	0.25377819659391876	0.9999274963730166	0.55198824
PRPF31	1.1410728	0.25383963508958685	0.9999274963730166	0.38575873
CHROMR	1.1399233	0.2543182641714169	0.9999274963730166	1.0052615
MYO9B	1.1395667	0.25446689917583987	0.9999274963730166	0.5320095
NPM1P25	1.1392349	0.2546051744845196	0.9999274963730166	4.2486825
TCP11L1	1.1384853	0.25491790712020856	0.9999274963730166	1.7398902
CCDC137	1.1353911	0.2562114659647655	0.9999274963730166	0.8445291
PHKG2	1.1334875	0.2570096179435205	0.9999274963730166	0.63913727
GTF2H2	1.13075	0.2581603409126568	0.9999274963730166	0.8124192
SPHK1	1.12443	0.26083066034619895	0.9999274963730166	1.5450084
ARIH2OS	1.1225694	0.2616204095809931	0.9999274963730166	1.4732744
UBE2W	1.1216562	0.26200865616649693	0.9999274963730166	1.0443372
NCBP2	1.1212722	0.26217199305354466	0.9999274963730166	0.5080617
PAG1	1.1199887	0.26271857079088523	0.9999274963730166	1.5390202
CNOT8	1.1186188	0.26330277691383797	0.9999274963730166	0.57633907
NNT	1.1178011	0.26365198376377974	0.9999274963730166	0.7182179
CHURC1	1.1175194	0.2637723400705646	0.9999274963730166	0.36598042
ZNF767P	1.1158042	0.2645059725463791	0.9999274963730166	1.7491511
PFKP	1.1157315	0.26453709794408375	0.9999274963730166	1.1866101
GRIPAP1	1.1154315	0.26466551689643947	0.9999274963730166	0.5140116
ZNF589	1.1140276	0.2652673225414691	0.9999274963730166	2.2665982
CAPRIN1	1.113178	0.2656319795825208	0.9999274963730166	0.28082758
EPS15	1.112626	0.2658690940819983	0.9999274963730166	0.54365385
SLC25A5	1.1126192	0.26587202233183793	0.9999274963730166	0.057073906
SBDSP1	1.1112857	0.2664454104806412	0.9999274963730166	1.0404708
SPRTN	1.1110653	0.2665402430246613	0.9999274963730166	0.8919996
PPM1M	1.1105382	0.26676715319548583	0.9999274963730166	0.98771155
AKT1	1.1100657	0.26697070284630564	0.9999274963730166	0.46990854
EIF2S3	1.1088662	0.26748788546552615	0.9999274963730166	0.29774463
AC138409.2	1.1077826	0.26795570476400976	0.9999274963730166	0.6838645
SETD2	1.107744	0.267972387938498	0.9999274963730166	0.51993155
ZFYVE26	1.1069762	0.26830423687680993	0.9999274963730166	2.4212856
MPZL1	1.1057062	0.2688536832587918	0.9999274963730166	0.52808386
LZTFL1	1.1055881	0.2689048337964499	0.9999274963730166	1.5414432
C11orf24	1.1052951	0.26903175532148205	0.9999274963730166	1.1812034
LETM1	1.1049861	0.2691656085865778	0.9999274963730166	0.96039087
SFMBT2	1.1045182	0.2693684439605505	0.9999274963730166	1.970166
SS18L2	1.1043364	0.26944724325042924	0.9999274963730166	0.36747712
PCMTD2	1.1031324	0.2699696880690834	0.9999274963730166	0.54678
RGS14	1.1026372	0.27018478200013274	0.9999274963730166	0.8940599
RILP	1.1021669	0.27038913131314	0.9999274963730166	0.5990396
CDK9	1.102051	0.27043949451101335	0.9999274963730166	1.1032934
TIMM10B	1.101867	0.27051949633731975	0.9999274963730166	0.9126473
MYL6B	1.1015921	0.2706390354557434	0.9999274963730166	0.3086711
DDX3X	1.1012378	0.2707932054304856	0.9999274963730166	0.06738527
LARP4B	1.1009288	0.27092765912494843	0.9999274963730166	0.62925494
AC008014.1	1.1005062	0.27111161838214826	0.9999274963730166	1.7006881
GNA12	1.0998088	0.27141543722441597	0.9999274963730166	0.7368471
NDUFAB1	1.0990568	0.2717432685568363	0.9999274963730166	0.13314435
AL157713.1	1.0984867	0.2719920464242642	0.9999274963730166	1.5014546
DNAJC8	1.0978824	0.2722558616212811	0.9999274963730166	0.16835786
CYHR1	1.096876	0.2726956116259681	0.9999274963730166	0.51281124
PDHB	1.0965034	0.27285853164867646	0.9999274963730166	0.38586462
MAPRE2	1.0961286	0.27302251226598684	0.9999274963730166	1.2092302
HAX1	1.0952017	0.27342828095723015	0.9999274963730166	0.34249532
TUFM	1.0931457	0.2743298025838652	0.9999274963730166	0.113988176
KRASP1	1.0929186	0.27442954266810593	0.9999274963730166	0.9306166
SH3GLB2	1.092571	0.27458219293237673	0.9999274963730166	0.65322065
CEP120	1.0924188	0.274649058034229	0.9999274963730166	1.5070354
CASC3	1.0916033	0.2750075246307965	0.9999274963730166	0.6472031
PAPLN	1.0914624	0.2750694648404627	0.9999274963730166	2.312701
POLE	1.0912012	0.2751843791521804	0.9999274963730166	1.5417897
CHMP4BP1	1.0911897	0.2751893761698231	0.9999274963730166	0.8215757
CTCF	1.0898131	0.2757954734008139	0.9999274963730166	0.4135382
PHEX	1.088659	0.27630425607345743	0.9999274963730166	7.436342
SGF29	1.0877821	0.2766912784240415	0.9999274963730166	0.8811955
RBM8A	1.086719	0.27716101333479637	0.9999274963730166	0.12857957
AL499604.1	1.0862101	0.2773860358717236	0.9999274963730166	1.4985791
CTDSPL2	1.0857035	0.2776101774253743	0.9999274963730166	0.4546947
ACTR3	1.0853423	0.27777006666517023	0.9999274963730166	0.1490759
SLFN11	1.0848835	0.27797328681121036	0.9999274963730166	0.86977315
CTNNBL1	1.0842541	0.2782521245157312	0.9999274963730166	0.3524893
PARN	1.0841906	0.2782803208671918	0.9999274963730166	0.66647846
CDK13	1.0838816	0.27841730223565464	0.9999274963730166	0.43468103
TMX2	1.0836817	0.2785059616863069	0.9999274963730166	0.49648625
OTULIN	1.0816758	0.27939664218656335	0.9999274963730166	0.8532836
ATP2B4	1.0816417	0.2794117893695951	0.9999274963730166	0.6342922
PREB	1.0809579	0.27971586085548117	0.9999274963730166	0.8447971
HP1BP3	1.0799651	0.2801577203000759	0.9999274963730166	0.13382064
BET1	1.0791928	0.2805018289496918	0.9999274963730166	0.9717854
CTPS1	1.0780432	0.28101447490629394	0.9999274963730166	0.9478596
UBE2J2	1.0772526	0.28136741456244685	0.9999274963730166	0.40181136
PPP1R18	1.0760645	0.2818984038051112	0.9999274963730166	0.37121356
ANKRD20A5P	1.0735543	0.28302251751629126	0.9999274963730166	3.1958876
PSMD10	1.0724797	0.28350462632011775	0.9999274963730166	0.67109257
TMEM131	1.0718777	0.2837749725272092	0.9999274963730166	0.63405573
WDR33	1.071187	0.2840853204547056	0.9999274963730166	0.8201485
CNOT6L	1.0709031	0.28421299725537696	0.9999274963730166	0.4355211
SRPK2	1.0705464	0.2843734143341691	0.9999274963730166	0.55824983
PIAS1	1.0686291	0.28523683382163456	0.9999274963730166	0.52757573
MALT1	1.0681657	0.28544579336377973	0.9999274963730166	1.0746498
HDGFL2	1.0679612	0.28553801428926384	0.9999274963730166	0.53390294
FN3KRP	1.0678022	0.2856097555988757	0.9999274963730166	0.80526775
FAM76B	1.0673115	0.2858312055816674	0.9999274963730166	0.5527731
BTG2	1.0670547	0.2859471029496974	0.9999274963730166	0.39650285
TMEM159	1.0665027	0.28619644112853193	0.9999274963730166	0.89657384
MS4A4A	1.0649534	0.28689701417844415	0.9999274963730166	1.045197
MAP1LC3B2	1.0638516	0.28739592615514664	0.9999274963730166	0.32774684
AC141586.1	1.0583086	0.2899147948367803	0.9999274963730166	3.0513794
RING1	1.0570068	0.29050846444962153	0.9999274963730166	0.5855249
AC092683.1	1.0567479	0.2906266742144007	0.9999274963730166	0.901438
TDRD3	1.055921	0.2910043325139332	0.9999274963730166	0.85372657
TCIRG1	1.0559027	0.2910126364011725	0.9999274963730166	0.33650434
FGFR1OP	1.0555575	0.291170440536075	0.9999274963730166	1.1108112
NONO	1.0545965	0.2916098956516855	0.9999274963730166	0.15760545
STARD5	1.0542535	0.29176687761697206	0.9999274963730166	1.7831789
CWC25	1.0535629	0.29208309301186974	0.9999274963730166	0.44117078
GATAD2A	1.0534312	0.2921434497254549	0.9999274963730166	0.50909925
LRRK1	1.0518818	0.2928537899201965	0.9999274963730166	1.6286905
HDAC5	1.0503938	0.29353709883987034	0.9999274963730166	0.7856717
ETFB	1.0498486	0.2937877391317517	0.9999274963730166	0.13379472
MIA2	1.0482811	0.2945091293754599	0.9999274963730166	0.66063434
UHMK1	1.0477699	0.2947446218169517	0.9999274963730166	0.5624459
VCPKMT	1.0473247	0.2949498647112775	0.9999274963730166	1.1633701
UBE3A	1.0473088	0.29495719658521447	0.9999274963730166	0.41205642
TPTEP1	1.0451097	0.29597226608149674	0.9999274963730166	2.5258875
EIF4ENIF1	1.0445577	0.29622744880598006	0.9999274963730166	1.3280624
ATG101	1.0439216	0.29652166902590493	0.9999274963730166	1.3788029
AC243960.3	1.0436308	0.29665623478904	0.9999274963730166	0.8501498
VAMP1	1.0433309	0.29679504850968164	0.9999274963730166	1.9000577
CNPPD1	1.0425767	0.2971443780665264	0.9999274963730166	0.70244783
BHLHE40	1.0417793	0.29751399821188884	0.9999274963730166	0.6560162
DIPK1A	1.0411501	0.29780590959870756	0.9999274963730166	1.3529526
TRAPPC8	1.0408547	0.29794297368396816	0.9999274963730166	1.014774
MMP24OS	1.0407388	0.29799675648731794	0.9999274963730166	0.32619885
AC127502.1	1.0406798	0.2980241776673195	0.9999274963730166	0.48330608
WWP1	1.0402368	0.2982298902457752	0.9999274963730166	0.7215262
XKR8	1.0402346	0.29823094542644	0.9999274963730166	1.3964741
NSL1	1.0401869	0.2982531047964141	0.9999274963730166	0.8366201
HUS1	1.0398915	0.2983903063230905	0.9999274963730166	0.67991936
PMM2	1.0385216	0.29902726143132996	0.9999274963730166	0.51060075
USP11	1.0383353	0.2991139489141147	0.9999274963730166	0.67576694
RAD51-AS1	1.037797	0.29936459115725644	0.9999274963730166	1.1281508
FTX	1.0368451	0.2998080524832981	0.9999274963730166	0.3161108
TRIP10	1.0367929	0.2998324079068131	0.9999274963730166	1.151139
AC009061.2	1.0351344	0.3006061134152055	0.9999274963730166	1.7603344
MRPS6	1.0342984	0.3009966497386669	0.9999274963730166	0.16991961
YLPM1	1.0340486	0.3011134517227806	0.9999274963730166	1.2061164
BEND3P2	1.0338918	0.3011867338277503	0.9999274963730166	7.3199244
INTS11	1.0316496	0.3022362866853997	0.9999274963730166	0.41208357
ALG3	1.0308477	0.3026122487695626	0.9999274963730166	0.54447776
MPP6	1.0301684	0.3029309414554987	0.9999274963730166	0.9605806
ZBTB33	1.0301571	0.3029362726610222	0.9999274963730166	2.0138075
AC010618.1	1.0289985	0.3034803833258122	0.9999274963730166	0.118230335
AC005332.1	1.0282124	0.3038498946157846	0.9999274963730166	1.7171249
AL390728.4	1.0278467	0.3040219366924386	0.9999274963730166	1.319054
PEA15	1.0274082	0.30422825872054704	0.9999274963730166	0.8003562
CEP104	1.0265381	0.30463797098418255	0.9999274963730166	1.0543857
ERCC3	1.0252092	0.30526447836518134	0.9999274963730166	1.0378689
MYO5A	1.0250729	0.3053287838284139	0.9999274963730166	0.91210353
MAGOHB	1.0248253	0.30544562840923484	0.9999274963730166	0.411975
ATRAID	1.024555	0.30557322653728336	0.9999274963730166	0.14744
GNB5	1.0241416	0.3057684449848034	0.9999274963730166	1.7441217
DIP2A	1.023937	0.3058650121318288	0.9999274963730166	1.0438349
WDR83	1.0229897	0.3063127037795986	0.9999274963730166	1.1678525
PLEKHD1	1.0229647	0.30632451926744975	0.9999274963730166	5.9047937
H3-3A	1.0228989	0.30635567063778146	0.9999274963730166	0.3820489
MCCC1	1.0190324	0.3081876111850984	0.9999274963730166	1.0259498
ATE1	1.018762	0.3083159668318035	0.9999274963730166	0.683264
ACYP2	1.0185348	0.30842385605825595	0.9999274963730166	0.70296794
PXK	1.0182099	0.30857818103080237	0.9999274963730166	0.5383029
ABCB8	1.0153725	0.30992826681812935	0.9999274963730166	1.1811017
TLR7	1.014348	0.3104167249586155	0.9999274963730166	3.7692652
ARFGEF1	1.013194	0.3109675255178934	0.9999274963730166	0.60768855
BISPR	1.0114993	0.31177754631395305	0.9999274963730166	1.3203001
FAM172A	1.0112811	0.3118818858410939	0.9999274963730166	0.7744031
STIM2	1.010486	0.3122624852761138	0.9999274963730166	0.8724667
ZNF394	1.0104315	0.3122885947307521	0.9999274963730166	0.51705843
LRP8	1.0103747	0.31231579360891015	0.9999274963730166	1.9189755
LCN12	1.009884	0.31255085691534557	0.9999274963730166	5.141369
SPATS2	1.0081007	0.31340611908975047	0.9999274963730166	0.6270206
SEC62	1.0075783	0.31365699696331917	0.9999274963730166	0.05115526
SLC33A1	1.0059767	0.314426815298971	0.9999274963730166	0.86402816
PYCR2	1.0057359	0.3145426683817919	0.9999274963730166	0.43332967
BCAS4	1.0041933	0.31528544947795833	0.9999274963730166	1.2142743
TMEM106A	1.0017353	0.31647146529264425	0.9999274963730166	2.0817673
GOLGB1	1.0015036	0.31658342166041686	0.9999274963730166	0.30534667
ACTR2	1.0002518	0.31718865487893444	0.9999274963730166	0.08890816
METTL8	0.9987956	0.3178937006671708	0.9999274963730166	0.9856695
GANAB	0.996433	0.31903979585247866	0.9999274963730166	0.35577977
ENOPH1	0.9958787	0.3193090786459891	0.9999274963730166	0.75715756
RPRD1A	0.99563336	0.31942831686309947	0.9999274963730166	0.77962816
GAMT	0.99522215	0.3196282166031048	0.9999274963730166	0.63427365
DCTN2	0.99510175	0.3196867662680132	0.9999274963730166	0.2742582
EXOSC5	0.9935956	0.3204197822182929	0.9999274963730166	0.5075232
SDK2	0.9932798	0.3205736004839975	0.9999274963730166	1.8848786
RELL1	0.99060374	0.3218791198833951	0.9999274963730166	0.56622386
KRR1	0.98902714	0.32264986814033314	0.9999274963730166	0.27911043
ASCC3	0.987555	0.3233706151558884	0.9999274963730166	0.528898
SLC4A7	0.9875278	0.32338397221167314	0.9999274963730166	1.348724
CAPN7	0.98745507	0.3234195927850907	0.9999274963730166	0.47536904
PDCD4-AS1	0.9873006	0.3234952949938855	0.9999274963730166	1.7562221
ARPC4	0.9862079	0.324031106499472	0.9999274963730166	0.9325966
FCHO1	0.98487663	0.32468466375144966	0.9999274963730166	1.4990348
KCNAB2	0.9843519	0.3249425303060107	0.9999274963730166	0.40117046
MLLT1	0.983266	0.3254765474056923	0.9999274963730166	0.798764
FAM32A	0.9831433	0.3255369115622113	0.9999274963730166	0.26383594
LRMP	0.98255265	0.32582765571714667	0.9999274963730166	0.5797848
AL450313.1	0.9813168	0.32643652795924105	0.9999274963730166	7.826376
C1GALT1	0.9804445	0.3268667649771959	0.9999274963730166	0.6425944
ZNF75A	0.9797448	0.3272121169744956	0.9999274963730166	0.7127631
CHD8	0.9780364	0.32805630905255656	0.9999274963730166	0.46964222
ATG13	0.9777547	0.32819564652097555	0.9999274963730166	0.6227146
MRPS7	0.97759795	0.3282731977016168	0.9999274963730166	0.29809463
TRPV2	0.9772845	0.32842833571712216	0.9999274963730166	0.9248713
AC068282.1	0.9758919	0.32911803785739335	0.9999274963730166	1.2264413
[truncated: 19,270 more rows]

## Sheet: 1_B
names	scores	pvals	pvals_adj	logfoldchanges
DNTT	41.045483	0.0	0.0	7.6899576
VPREB1	39.200542	0.0	0.0	7.309773
CD79B	39.109417	0.0	0.0	6.447575
VPREB3	38.636974	0.0	0.0	7.972023
IGLL1	35.02084	1.0839757870488673e-268	4.611016202948472e-265	4.7479625
CD9	33.16283	3.699487114353663e-241	1.3114065239198012e-237	5.944708
HLA-DRA	32.116814	2.5684160718095437e-226	7.803948775902455e-223	2.295196
H1-10	31.661057	5.341852425054864e-220	1.4201982403561489e-216	2.9439316
YBX3	31.54313	2.227418114888874e-218	5.263883987285718e-215	3.0685723
MALAT1	29.625557	7.004444160600965e-193	1.489775228518219e-189	1.7845058
CD74	29.196625	2.1402898262170395e-187	4.1383476648918377e-184	1.8983867
TPT1	27.607462	9.05330724711333e-168	1.3753913702775243e-164	1.1355501
LAPTM5	26.918781	1.3239609836716792e-159	1.877288410780863e-156	2.640694
CXCR4	26.50328	8.883985646449287e-155	1.1809593169645617e-151	3.079378
CD79A	25.134506	2.087644952968892e-139	2.220106025234768e-136	5.1643267
HLA-DPB1	24.73091	4.9756860444425786e-135	4.8103575672386004e-132	1.9883513
ARHGDIB	24.0378	1.1199327035234487e-127	1.0356455944017492e-124	1.7826487
JUND	24.025757	1.4965430735856245e-127	1.3262489430038604e-124	1.6756917
PPP1R14B	23.734926	1.5724945183871536e-124	1.2387179967250507e-121	2.687215
MME	23.523073	2.3686713719971177e-122	1.7992596932502392e-119	4.533655
TCF4	22.83809	1.9193287923993394e-115	1.4076622098462604e-112	3.0636091
MZB1	22.295069	4.1253429917034566e-110	2.830384519049704e-107	2.7043948
SSBP2	22.213064	2.568176227368676e-109	1.7069543806220117e-106	4.2181253
BCL11A	22.024961	1.660481431483494e-107	1.038728810771248e-104	2.8044724
EEF1A1	21.835669	1.0637530658846778e-105	6.46427541665749e-103	1.1541644
H3-3B	20.986471	8.718231552148972e-98	5.150779635629347e-95	1.1085583
SNHG6	20.75922	1.011947425596792e-95	5.663976261846887e-93	1.7707223
GMFG	20.268158	2.4567799285525134e-91	1.339826982061113e-88	1.5078799
H1-2	20.233973	4.917662744937542e-91	2.614844223051914e-88	2.5061634
CD24	20.188509	1.2353538234132022e-90	6.408473285408633e-88	4.976574
SOCS2	19.62974	8.615349017922848e-86	4.362853768147644e-83	4.429126
HNRNPH1	19.608582	1.3062620134909886e-85	6.461136456962752e-83	1.8796327
ARPP21	19.541706	4.853204348845579e-85	2.3459728021726505e-82	7.490631
AKAP12	19.51098	8.856570380779958e-85	4.1860087873068655e-82	3.5948868
TOP2B	19.508898	9.224814709726299e-85	4.265273566547145e-82	3.5836535
IGHM	19.500677	1.0833945292801712e-84	4.902706009204247e-82	3.3045638
BTF3	18.665382	9.469586629177568e-78	4.0281727603195542e-75	1.1931931
CD37	18.636864	1.6142977655499566e-77	6.732254740290593e-75	1.7516038
H1-3	18.622395	2.115388733602016e-77	8.652346725957938e-75	2.5057688
NACA	18.362057	2.6440390491103485e-75	1.0610578591609057e-72	1.0497303
CMTM7	18.0865	4.0713551968434555e-73	1.5744300669393355e-70	3.5322318
LTB	18.03351	1.0632100989052808e-72	4.038109927431503e-70	3.203067
PTMA	17.823172	4.6711379075250674e-71	1.7429900378096607e-68	0.8450694
MEF2C	17.817263	5.191482486341618e-71	1.9037524310689633e-68	2.474692
IGKC	17.78898	8.603165148908925e-71	3.101368128002439e-68	1.220047
HLA-DPA1	17.47895	2.0728067469212696e-68	7.110730112946529e-66	1.2769142
MAP1LC3B	17.378263	1.2054840086734182e-67	4.006162403199208e-65	2.3695185
HLA-A	17.170244	4.4355324463043e-66	1.4293839333400932e-63	0.95933306
HMGB1	16.547531	1.668055546771902e-61	5.2173343271017025e-59	1.0803407
LINC01013	16.236591	2.779490529914278e-59	8.210692233437052e-57	7.692988
BTG1	15.863843	1.1277658531433036e-56	3.28581533294588e-54	2.1369364
CD81	15.795917	3.319352866741956e-56	9.540448124693874e-54	1.349399
ZCCHC7	15.762732	5.615253410187489e-56	1.5924109970837028e-53	3.5597503
RBM38	15.561875	1.3216903619559393e-54	3.603978501082163e-52	3.433265
TCF3	15.493948	3.8114608514631895e-54	1.0261514031616529e-51	3.5493376
SMIM3	15.296008	8.12927545040103e-53	2.1085556043241403e-50	3.4197927
CCNI	15.221687	2.5389634691605056e-52	6.506170364527083e-50	1.2582217
FHIT	14.969899	1.1549667658922898e-50	2.856393970205013e-48	4.4864936
HNRNPA1	14.907284	2.955309136712665e-50	7.224881612499041e-48	1.1895534
SF1	14.83524	8.669258588767997e-50	2.0717579879158035e-47	1.466501
XBP1	14.818403	1.1140170097494516e-49	2.632669753373454e-47	2.119033
SMAD1	14.816255	1.1502126690146818e-49	2.6883377205794797e-47	4.5822554
PNRC1	14.43696	3.0291124302823314e-47	6.781704450492095e-45	1.1225486
SRP14	14.421923	3.767020800185023e-47	8.345913062409923e-45	0.9013225
RACK1	14.417703	4.0044938988155864e-47	8.78057533339265e-45	0.8389365
LIMD2	14.184475	1.1431785751518345e-45	2.4810474607045275e-43	1.5499501
HLA-DRB1	14.100635	3.763679454729741e-45	8.085828113398673e-43	1.0303301
ISG20	13.949144	3.1840084272508204e-44	6.772067523919771e-42	3.1976857
VDAC1	13.944309	3.4073169648944497e-44	7.175269755083173e-42	1.9405502
HMGB2	13.803306	2.4342791736589316e-43	5.075949386720766e-41	1.1732398
MPP1	13.7660675	4.078159289897454e-43	8.421200964740674e-41	2.68912
GAPDH	13.661121	1.7329354567480454e-42	3.5440196374590553e-40	0.9514113
ACTG1	13.506402	1.4335839003480937e-41	2.9038948549051055e-39	0.8199574
SNHG7	13.493065	1.7180727537712688e-41	3.447329188675577e-39	2.139158
PDE4B	13.3450575	1.2657217786893953e-40	2.4926515287911804e-38	2.7044978
ATP5MG	13.166962	1.359596978716597e-39	2.628842558211209e-37	0.91697943
TKT	13.151374	1.6711062183169546e-39	3.202050284448947e-37	1.2788191
HLA-DMA	13.130987	2.18785990785423e-39	4.1547850339421084e-37	1.353003
NEIL1	13.089523	3.7797180407266244e-39	7.114232124620759e-37	5.6447477
TMEM243	13.012305	1.041526542834053e-38	1.926280699090215e-36	3.202903
CD69	12.6828985	7.3560824526093205e-37	1.303804314037897e-34	3.7516577
FOXP1	12.669067	8.775145554295466e-37	1.5424675272257045e-34	2.3061507
ELK3	12.470019	1.0879907471718579e-35	1.8813394472844103e-33	3.0292013
ARGLU1	12.441891	1.5479633076782049e-35	2.655131579919979e-33	1.7178155
YPEL3	12.38107	3.3090108079501764e-35	5.630348069943384e-33	1.8774925
TRABD	12.314364	7.581018246749184e-35	1.2796879134135587e-32	2.1730733
EGFL7	12.121099	8.165632651312866e-34	1.3359603143136413e-31	2.618147
S1PR4	11.918586	9.47026621023975e-33	1.5375808551571698e-30	2.9144263
RCSD1	11.791658	4.309695048315637e-32	6.789844739453725e-30	3.0345588
AL138963.3	11.74773	7.254140945241658e-32	1.1344729688554767e-29	2.0062737
SIAH2	11.694011	1.3677213462079977e-31	2.1079757472824568e-29	3.878711
SRSF5	11.550622	7.328782956652377e-31	1.113399176464567e-28	0.93847805
HMHB1	11.509215	1.185515640775631e-30	1.7882788768550992e-28	7.5197754
LAT2	11.489611	1.4878066257395941e-30	2.2284619100602414e-28	2.4091144
EIF3F	11.384197	5.0127717835993896e-30	7.455709305271009e-28	1.111387
SH3BGRL3	11.360918	6.545331735676479e-30	9.667545880979378e-28	0.8481082
SON	11.290227	1.4665815233643077e-29	2.1512222358921005e-27	1.0504044
CMTM8	11.200022	4.076338846415389e-29	5.938332255096501e-27	2.8753474
GLRX	10.983568	4.584479596141359e-28	6.500486435355371e-26	1.4905237
TMA7	10.980992	4.717124264986484e-28	6.644272582251491e-26	0.8070166
RBM39	10.945697	6.967987115744121e-28	9.623514153555956e-26	0.8570188
PNISR	10.856049	1.8665286914654135e-27	2.544820431972941e-25	1.3464439
AC004086.1	10.756306	5.534433423985278e-27	7.403261917908357e-25	0.63166624
PCBP2	10.646533	1.8097966162317182e-26	2.3801642100674965e-24	1.2009577
PMAIP1	10.57878	3.737913119500653e-26	4.847663057235328e-24	2.6860003
TRA2A	10.436733	1.6850996013914437e-25	2.1333561560711082e-23	1.7450196
HMCES	10.140759	3.642568586470583e-24	4.478253830383979e-22	3.4715211
LCN6	9.960501	2.269168656909482e-23	2.726720235243377e-21	6.9768972
BTG2	9.866217	5.832328357684696e-23	6.930044236848927e-21	2.6577396
NOP53	9.854531	6.55219533771193e-23	7.742146813210835e-21	1.0497452
ERGIC1	9.689829	3.330860194799214e-22	3.8925310705046414e-20	2.3191712
PTPRE	9.614287	6.958925471075513e-22	7.914940419481556e-20	1.5184
SELENOF	9.5815115	9.56352556869032e-22	1.0762255307961609e-19	1.3848509
DDX5	9.56048	1.1721202320484468e-21	1.3120960639704428e-19	0.6286061
SOX4	9.453246	3.28482452920126e-21	3.619944710444642e-19	2.5594664
SNORD3B-2	9.448665	3.4318149689677315e-21	3.762436730668798e-19	2.5059352
ZNF619P1	9.445056	3.552159625288122e-21	3.8744042600129777e-19	2.979262
MLXIP	9.439353	3.750895944973241e-21	4.070296217022238e-19	3.1907127
N4BP2L2	9.353119	8.510048043813244e-21	9.141424840599186e-19	1.0964192
MSI2	9.232326	2.64818850464817e-20	2.7745971086385186e-18	2.6161962
HLA-DQB1	9.081383	1.0720388187427988e-19	1.1068540599922615e-17	1.5020391
EIF3H	9.038028	1.5952363087575799e-19	1.631205819757931e-17	0.871052
CIRBP	8.97167	2.920518724540827e-19	2.902640782815834e-17	0.7685767
ANKRD10	8.881306	6.608021020772409e-19	6.388454504127653e-17	1.950658
HMGN1	8.877554	6.834668845240558e-19	6.577672926218164e-17	0.75575864
GABPB1-AS1	8.832299	1.0254600705236734e-18	9.740313311613039e-17	2.0588224
GNAS	8.832259	1.0258264054733747e-18	9.740313311613039e-17	0.6006944
CDKN2D	8.824225	1.102201844901074e-18	1.0418991572978198e-16	1.6348437
ZFAS1	8.809321	1.2590521005805957e-18	1.18490173129419e-16	0.714129
UBE2D2	8.7558365	2.025957096398338e-18	1.8816629468688322e-16	1.310275
ERG	8.754335	2.0530929060402854e-18	1.8985753486335146e-16	4.7313547
IRF1-AS1	8.739219	2.3472898958237492e-18	2.1612341469383256e-16	2.318224
COX7A2L	8.705449	3.163204466605625e-18	2.875136572659617e-16	1.2105789
MDM4	8.69992	3.321183103885456e-18	3.005882699427224e-16	2.1559503
COX7C	8.65986	4.723441729153098e-18	4.256901785481239e-16	0.62412
LHPP	8.640272	5.607927305349129e-18	5.032700669091587e-16	3.7934222
LINC00426	8.639739	5.6341748771902555e-18	5.035011153905863e-16	6.0236506
SEPTIN9	8.602457	7.8027150386904e-18	6.943763437569293e-16	1.702872
AC245014.3	8.567524	1.0573387134988915e-17	9.370223790586635e-16	1.6675453
HLA-DRB5	8.562292	1.1064573927483572e-17	9.764830824217764e-16	3.355316
MAP1LC3B2	8.493774	2.0003241446715406e-17	1.7436432062712705e-15	2.0891955
GAS5	8.449076	2.9361824612513744e-17	2.548965908912469e-15	0.7403921
MDM2	8.432692	3.378041187349672e-17	2.9206324395829334e-15	2.702141
TBC1D10C	8.428957	3.487591643572076e-17	3.0031411606127322e-15	2.5692966
UBXN1	8.425588	3.5894327861235703e-17	3.0660098766290044e-15	1.0840938
ZEB2	8.394138	4.693250703454228e-17	3.992829968470719e-15	1.0131902
HLA-B	8.370271	5.748598165165016e-17	4.8711926045774795e-15	0.4863769
CCND3	8.300983	1.0325337032431683e-16	8.680221080742665e-15	1.5684701
TMEM263	8.261399	1.4397429885619368e-16	1.2055863631387336e-14	2.7501507
ATP5F1C	8.257405	1.4887296329264243e-16	1.2417172769691027e-14	0.9260045
RAG2	8.234314	1.805888759625182e-16	1.5003690636120313e-14	6.9867167
NPM1	8.199786	2.4081515582414505e-16	1.9929562448341403e-14	0.6641278
KMT2E	8.106255	5.220394161908226e-16	4.286971560989423e-14	1.2458224
H4C3	8.059996	7.629729832130744e-16	6.193768083953771e-14	0.6496697
WASF2	8.040679	8.934227355091994e-16	7.19780612179741e-14	1.4364431
EBF1	8.0266	1.002113714136172e-15	8.04300248526877e-14	2.5987713
SNX2	8.017202	1.0818080244828408e-15	8.649990553656218e-14	1.8266892
JUP	7.9686866	1.6036976084164038e-15	1.2727255385600184e-13	2.9630518
YPEL5	7.9637055	1.6696256697162576e-15	1.320121500713572e-13	1.1560307
EIF3E	7.909789	2.578256127300754e-15	2.008678738884972e-13	0.9003397
HNRNPK	7.857208	3.927912640220783e-15	3.0269120994512983e-13	0.7037195
IGLC2	7.8177466	5.377722823146269e-15	4.1291980767327795e-13	0.9551596
SNRPN	7.8052425	5.938716842385688e-15	4.543545630241051e-13	1.854667
TERF2	7.731165	1.0656677463890893e-14	8.066080888950015e-13	2.8315556
FAM30A	7.7076488	1.281568337021224e-14	9.665842893654047e-13	2.274759
MYB	7.6597776	1.8625528156799827e-14	1.389987222340265e-12	2.5874052
RB1	7.648078	2.0400543540462607e-14	1.5171299320353118e-12	2.1315649
ADA	7.6438556	2.1081154344046018e-14	1.56228247994256e-12	2.4315853
GYPC	7.595625	3.063100543597326e-14	2.2542936145941706e-12	0.89432114
ZFP36L2	7.5608745	4.003689402530462e-14	2.9363610311179445e-12	1.3056674
GBP4	7.5319176	5.000047585245893e-14	3.654502133697419e-12	3.567926
TSPAN14	7.524252	5.3022981839401624e-14	3.862143153226826e-12	2.563131
GNG7	7.4550214	8.985323412735036e-14	6.522486131927013e-12	3.9271443
SLC38A1	7.4384065	1.0190722021074937e-13	7.297860830513227e-12	2.5974271
PNN	7.3852286	1.5219145711199453e-13	1.075402027014954e-11	1.1105405
HBB	7.3494024	1.9909490301481127e-13	1.397541086541921e-11	-0.23708831
SRSF3	7.340433	2.1290390327535324e-13	1.4895569469616738e-11	0.6847013
RASGRP2	7.3218637	2.445505094158291e-13	1.7051799183905036e-11	1.476755
SOD2	7.321439	2.453265574439297e-13	1.7051799183905036e-11	1.2278672
EZR	7.290114	3.0969266053946657e-13	2.138588700329193e-11	1.768396
PRDM2	7.283396	3.255209080992576e-13	2.240616244130456e-11	2.1013694
TLE4	7.250479	4.152997853771432e-13	2.8493584307053092e-11	2.2675674
BLNK	7.2321496	4.754085435694602e-13	3.2512746987713345e-11	2.8076253
CDKN1B	7.2080398	5.676301814243584e-13	3.869527669459833e-11	1.8805643
PPP1R18	7.1809435	6.923206691921026e-13	4.704462719823268e-11	2.016976
BCR	7.1680827	7.605544006942109e-13	5.1516660982054683e-11	3.3873627
GADD45A	7.128576	1.0141259912953027e-12	6.825773958499934e-11	1.1313059
CYBC1	7.1123033	1.1412218122272793e-12	7.656986348347635e-11	1.7491645
FAU	7.094804	1.2953519910534373e-12	8.609637968036111e-11	0.4055495
AC103591.3	6.9708037	3.1513543224668878e-12	2.0815576113213738e-10	1.8911917
SOCS2-AS1	6.9242735	4.382189238492633e-12	2.8590424206595036e-10	4.9083066
RF00012-39	6.8767104	6.125047906232839e-12	3.94768617932322e-10	2.6417258
P4HA2	6.8743024	6.2293894531771786e-12	4.0028061715898915e-10	4.7058535
EIF1	6.854561	7.1532024464202705e-12	4.568812697685068e-10	0.35701427
USP22	6.8392663	7.959974149255386e-12	5.068882939536312e-10	2.0063195
EEF2	6.7778015	1.2201849821035614e-11	7.685925847804702e-10	0.5133034
HPS4	6.7776217	1.2217033920450276e-11	7.685925847804702e-10	3.1187675
AC010970.1	6.777228	1.225035903148147e-11	7.685925847804702e-10	0.3675929
MYL6B	6.7678304	1.3072775808615354e-11	8.177790255101176e-10	1.739239
AFF3	6.7623816	1.3574165827045428e-11	8.466537623912879e-10	2.566336
HLA-C	6.7536945	1.4412701993446404e-11	8.937135822116955e-10	0.40922764
SH3TC1	6.7522626	1.4555730641618055e-11	8.999588227226e-10	3.0157957
YTHDC1	6.749932	1.4791485833631994e-11	9.066285654049536e-10	1.3195509
AC022400.8	6.7132297	1.9036343449509825e-11	1.1535156376855397e-09	2.6816857
H2AC6	6.7051816	2.0115620523522925e-11	1.215452082144344e-09	2.9362879
PBXIP1	6.6958585	2.1440940474347678e-11	1.2882128896861603e-09	2.7479157
RNU4-2	6.6874223	2.2713563363995885e-11	1.360830363912193e-09	2.7162285
DUSP26	6.6682796	2.5881934911039266e-11	1.5419688336775744e-09	7.808499
LUC7L3	6.644013	3.05255451751471e-11	1.8135413975704011e-09	1.0259047
SMARCD2	6.6151166	3.712595947453086e-11	2.1995321227403812e-09	2.0044198
ATP1B3	6.5887785	4.43459303845362e-11	2.61998220374639e-09	1.1637919
SHOC2	6.573838	4.903452200953533e-11	2.87304476204079e-09	1.5071613
TNRC6B	6.5539336	5.604085533888299e-11	3.265569732062198e-09	1.5425135
CD53	6.5172687	7.159914665273936e-11	4.16077117529266e-09	1.1282482
PIM3	6.516818	7.181454074025236e-11	4.161916803826778e-09	2.0232735
CHD9	6.51077	7.476666350151996e-11	4.321228711994099e-09	1.0927719
CD38	6.4992356	8.072914146515927e-11	4.6531927095459966e-09	2.8627684
TAF7	6.444095	1.162919739233625e-10	6.648962347784938e-09	1.6407173
NDUFA5	6.4379616	1.210885744089379e-10	6.9046458152914205e-09	1.3540342
SPTBN1	6.4075985	1.478295235154993e-10	8.384496361736413e-09	2.6303785
WASHC4	6.3850207	1.7137401450206257e-10	9.6427352233978e-09	1.8508275
TSC22D3	6.3701205	1.8887986752036798e-10	1.0571805006028174e-08	0.67745215
SEPTIN6	6.355551	2.07681113277241e-10	1.1563271199721567e-08	1.1540548
CALHM6	6.346005	2.2097793314842113e-10	1.2271487363273549e-08	2.6686544
KLF10	6.3251934	2.529156204092562e-10	1.3972109949310314e-08	1.8236623
AC243960.3	6.2995205	2.985679820606654e-10	1.6408895117437447e-08	3.0368102
SLC25A5	6.298636	3.002761565616067e-10	1.6460241169868074e-08	0.6349398
CDK13	6.2573776	3.9150417691639393e-10	2.1351031638037904e-08	2.1157255
UBE2B	6.242862	4.2963482867340687e-10	2.3370596345408417e-08	1.0380722
PRDX1	6.174941	6.61880729371509e-10	3.5459801594465054e-08	0.73608965
BACH2	6.1664796	6.98270629477188e-10	3.722184967005091e-08	5.222649
ZMIZ1	6.140256	8.238856380781036e-10	4.369881206055657e-08	2.5134134
REPIN1	6.0782976	1.214653072595703e-09	6.394667376494557e-08	2.051769
TMEM107	6.0513034	1.4367841314201945e-09	7.545422639796572e-08	1.5451103
SRSF9	6.0494123	1.453753506283953e-09	7.615734809151082e-08	0.70805085
ARHGEF7	6.0431786	1.5110723752407368e-09	7.89655979090792e-08	2.7485282
H1-4	6.017172	1.7749066494942063e-09	9.229948539875861e-08	1.0446041
FOXO1	6.0128183	1.823253206312121e-09	9.458237181720122e-08	3.2910023
RAG1	5.9821815	2.2016892755715845e-09	1.1365953689837872e-07	8.298526
MND1	5.9811716	2.2153854561205244e-09	1.1408966892549015e-07	3.173052
WDR74	5.978866	2.2469584372240637e-09	1.1543613285342661e-07	2.1712694
SLC25A3	5.9360247	2.9201570679050253e-09	1.4894201601264264e-07	0.56116027
CLK1	5.918708	3.2448076831720558e-09	1.6471077473361923e-07	1.4638342
H2BC15	5.9178033	3.262694657963883e-09	1.6522441114341388e-07	3.1300025
ARID1B	5.904312	3.541208775393879e-09	1.7847860057784934e-07	1.5378587
ACSS1	5.8780117	4.152237159930105e-09	2.0779748742247858e-07	2.4941065
PAIP2	5.8338833	5.415195631054978e-09	2.6973254303725604e-07	1.1136487
JMJD1C	5.8315268	5.49224314435514e-09	2.729311201805829e-07	1.437679
HHIP-AS1	5.831102	5.5062546305837275e-09	2.729895798085905e-07	4.497493
EBLN3P	5.810253	6.237845854468102e-09	3.078253909018145e-07	1.8644522
PEBP1	5.8047814	6.4450067745036396e-09	3.173121506641618e-07	0.6161928
TRIR	5.796679	6.7640918924970315e-09	3.3072521945176864e-07	0.6154833
CSRNP1	5.794762	6.841812436380313e-09	3.337580474985617e-07	1.8901615
DENR	5.782004	7.381595543816775e-09	3.58445560779541e-07	1.4273379
SYF2	5.7642903	8.200205742626273e-09	3.9728969462395944e-07	1.003004
PIK3AP1	5.708785	1.1378547028705583e-08	5.500234471671342e-07	2.1823814
ARRDC3	5.693856	1.2420184799233256e-08	5.976581685404799e-07	1.628055
PPFIBP1	5.675843	1.3800733177692171e-08	6.596130201265951e-07	2.9724162
AC092881.1	5.660038	1.5133941674932948e-08	7.217125683501095e-07	1.2799009
TAPT1	5.647748	1.625633193663073e-08	7.71776615982587e-07	3.2121449
ITPR1	5.6359653	1.7408017939391373e-08	8.209559502281932e-07	2.402468
KLF15	5.6194844	1.915280406151015e-08	9.01241127398804e-07	1.389664
NR3C1	5.614027	1.9767137730654606e-08	9.280954798968935e-07	1.3898692
PDE4D	5.608712	2.0383780677301774e-08	9.54939716355796e-07	2.2960405
NGLY1	5.6011376	2.1294947505951635e-08	9.9543349121777e-07	1.5579243
SUSD3	5.5975604	2.1738936791237117e-08	1.0139593127474172e-06	4.0287437
SPPL2B	5.5564017	2.753924666963757e-08	1.2761050924107222e-06	2.2656105
SNHG5	5.541761	2.994449785977607e-08	1.3845424456077768e-06	0.5748333
NDUFB4	5.535002	3.1122398146519124e-08	1.4358834841178205e-06	0.76871824
PSME1	5.5335703	3.137770970891158e-08	1.4445292376598276e-06	0.4718665
LEF1-AS1	5.529485	3.211722404211318e-08	1.4753806439561669e-06	4.987036
REXO2	5.5202303	3.385556526609769e-08	1.5518836587168788e-06	0.91221714
BAZ2A	5.4946427	3.91501795837404e-08	1.7868780462802031e-06	1.8905069
EIF1B	5.475429	4.364533780098345e-08	1.9877787787775527e-06	0.9447598
UBC	5.4532022	4.947078828703954e-08	2.2434844266035053e-06	0.33767286
ARID5A	5.4488	5.071076185976206e-08	2.2899515796078117e-06	2.580235
GALNT7	5.4264164	5.7496702644365564e-08	2.5908842553877355e-06	2.5744247
MAF1	5.425264	5.7868961803497774e-08	2.6021457687073873e-06	1.1982162
MKNK2	5.4189563	5.994798450493075e-08	2.6786421899902773e-06	1.376937
ATP5MC2	5.4150963	6.125572387572488e-08	2.730756189892403e-06	0.36954594
RBM3	5.3868613	7.169865862998078e-08	3.1836300008372886e-06	0.53833306
PSMA3-AS1	5.296217	1.1822620468286239e-07	5.212540260409806e-06	1.461326
EDEM1	5.2858753	1.2510493181537625e-07	5.497638005746358e-06	2.507387
IGLC3	5.2462177	1.5525336307509698e-07	6.780459505634985e-06	1.0676893
RABAC1	5.2405663	1.600845973186198e-07	6.9771297138723865e-06	0.6365882
KLF3	5.2221	1.769057474562394e-07	7.663153447345734e-06	2.1570032
ABHD17B	5.2075357	1.9136500925091347e-07	8.222509862136725e-06	3.442177
KANSL1	5.172294	2.312371096305516e-07	9.836364169464404e-06	1.3531083
CSGALNACT1	5.1594305	2.477019982566433e-07	1.047390417678041e-05	4.0786114
RBM8A	5.148718	2.622727207274753e-07	1.1046096033965689e-05	0.7172781
IER2	5.129681	2.9023377013625186e-07	1.2151539482338465e-05	0.5077115
BBX	5.1236954	2.996045946442156e-07	1.2494686516642789e-05	1.2939299
H2BC8	5.1229796	3.007450748422698e-07	1.2517704494755844e-05	3.954565
POU2AF1	5.1056595	3.296424320390816e-07	1.3693681419998489e-05	5.4477553
JPX	5.1030893	3.3415326705302326e-07	1.3854007479436163e-05	1.53266
DEPP1	5.0383177	4.696414265121852e-07	1.9209237500937823e-05	0.41072696
SMC4	5.034729	4.785258352881183e-07	1.9535059483191917e-05	1.4587042
NEAT1	5.0299015	4.907312699230212e-07	1.9956717743771965e-05	0.6022119
PPP1R10	5.008671	5.480726117508764e-07	2.211946182035938e-05	1.0291991
RBM5	4.9996214	5.744300503021096e-07	2.3139304431582516e-05	1.3001158
RBMX	4.9939985	5.914189996236669e-07	2.3778621366721685e-05	0.6167065
TAF1D	4.992198	5.969594926896752e-07	2.395609707550321e-05	0.776875
AP001059.2	4.9758825	6.495099522840919e-07	2.5918249859531616e-05	6.7382236
UBALD2	4.9666877	6.810608678507717e-07	2.702674557914688e-05	1.2759609
MEF2A	4.9637723	6.913703103493973e-07	2.738315666819615e-05	1.3871994
POLA2	4.963122	6.936906944991683e-07	2.7423991415060987e-05	3.4618478
SLC8A1-AS1	4.962511	6.958754245343092e-07	2.7459321715065347e-05	4.0861006
LMF1	4.9603515	7.036569828068071e-07	2.7714963643181445e-05	3.3149025
HNRNPM	4.946595	7.552285358359813e-07	2.9636449683940013e-05	0.6542821
SSH2	4.9433255	7.680102611016854e-07	3.0082523468456256e-05	1.6088609
EPC1	4.9359765	7.975063740356805e-07	3.1180446818685455e-05	1.6577431
FXR1	4.9351835	8.007540372699736e-07	3.12499772820093e-05	0.81470406
GRK2	4.9223485	8.551175138347786e-07	3.3188858397357496e-05	0.87916374
ATP5ME	4.921447	8.590666379938104e-07	3.328139949633944e-05	0.5091254
KAT6B	4.9195614	8.673841770218448e-07	3.3481658913026524e-05	1.3468148
U2SURP	4.890154	1.0075718399104638e-06	3.8543247235711606e-05	0.66264445
ATP5F1A	4.885803	1.0300802757369075e-06	3.926304190797184e-05	0.6270034
MGMT	4.871987	1.104815559931589e-06	4.203635446186935e-05	1.067336
CGGBP1	4.857052	1.1914630316700187e-06	4.501106078257483e-05	1.1103318
CDK9	4.8235307	1.410389852396551e-06	5.299926107883789e-05	3.1086771
ACP1	4.812279	1.4921879150641617e-06	5.5875606981513475e-05	1.0662228
CPNE1	4.801144	1.5776152337972895e-06	5.877749336260256e-05	1.3060657
AL138720.1	4.801099	1.577974926420897e-06	5.877749336260256e-05	5.9791636
RNU2-63P	4.798417	1.599245796711431e-06	5.936188281021889e-05	1.4666853
TRA2B	4.7924376	1.6476723173738346e-06	6.094668264038971e-05	0.5360302
UPF2	4.7899156	1.6685163339850085e-06	6.161054497834574e-05	1.055861
ZNF428	4.771406	1.8294436468949531e-06	6.73190950273508e-05	1.0175804
CLEC14A	4.768513	1.8559053406269772e-06	6.817487165767734e-05	5.4776506
CD34	4.7570505	1.964421904023023e-06	7.178915717640149e-05	3.0780249
ABLIM1	4.753607	1.9981934390607266e-06	7.289807247921542e-05	3.7953975
BTBD3	4.7518153	2.0159845888761813e-06	7.329568584753418e-05	4.0292006
RELL1	4.7335825	2.205910969189201e-06	7.938666734972102e-05	2.2971842
SCAND1	4.7312746	2.231143973628407e-06	8.015912360659221e-05	0.6332868
H2BC5	4.7038755	2.5526870592747753e-06	9.094321786216951e-05	2.8861525
LEF1	4.6881423	2.7569654821966365e-06	9.789298637869827e-05	3.5608418
DBN1	4.6743655	2.9486365778549858e-06	0.00010417699563853437	2.7748902
SINHCAF	4.670186	3.0092692802971032e-06	0.00010614286620669832	1.3875949
LINC02227	4.6494203	3.328696025725103e-06	0.00011721529101183313	7.608392
ERO1B	4.643777	3.4209660319126904e-06	0.00012026533311198514	2.921715
PSMB4	4.6399827	3.4843817260961243e-06	0.0001222925988982483	0.7911926
MACROH2A1	4.6150117	3.930733095545266e-06	0.00013750454310715833	0.49704054
CNOT6L	4.602105	4.182417640683844e-06	0.00014559057414026953	1.6834774
UBB	4.5921745	4.386515580412464e-06	0.00015203231576797234	0.3367318
PFKL	4.5784206	4.684996875371117e-06	0.00016149951141372496	1.524107
COMMD6	4.577779	4.6993920297227665e-06	0.00016173360692584712	0.40804872
TMCC1	4.575542	4.749882882163464e-06	0.00016320720358761667	2.5663462
AP001453.2	4.5739303	4.786591506733563e-06	0.0001642032496076067	4.112313
TCL6	4.566524	4.958777201248404e-06	0.00016983612285563978	5.5644207
CRIPT	4.5657425	4.977293125483203e-06	0.00017019621782299394	1.7804986
H2AC8	4.5565705	5.199557393426435e-06	0.00017751105329179268	3.2105398
CYGB	4.543681	5.528021532797761e-06	0.00018842225958505703	1.3142914
PSMB9	4.541821	5.577032419972807e-06	0.0001897886440646426	0.62055296
RF00003-10	4.5413675	5.589047397527712e-06	0.00018989368865497908	2.243605
PARP1	4.517007	6.271984292483961e-06	0.0002124185253452888	0.8717732
BRWD1	4.501268	6.754937112776918e-06	0.000228048821351829	1.7157652
LINC01578	4.495699	6.934181172669726e-06	0.0002337291590515252	0.70339096
RIMKLB	4.4942155	6.982692648773778e-06	0.00023499191447273654	3.5191576
EIF3L	4.4880958	7.186255475894667e-06	0.00024146045452891576	0.50203764
TSC22D4	4.4831862	7.353671464491589e-06	0.0002466959595871792	1.5046926
SNX29	4.4757204	7.615415560077554e-06	0.0002546733860806439	1.8927344
PCMTD2	4.454341	8.415133782933357e-06	0.00028009621350424035	1.7912816
HCP5	4.438045	9.077955211980995e-06	0.0003012153344830324	3.5179195
DDX17	4.4320884	9.332472897682694e-06	0.0003086973033605182	0.5775261
GAB1	4.4212418	9.813527736204386e-06	0.00032360297894780014	3.1576328
RTRAF	4.4176474	9.978111846969425e-06	0.0003285208372650042	0.6073153
PSMB8-AS1	4.3898544	1.1342651496505469e-05	0.00037114900719873047	1.7671171
EEF1D	4.388305	1.1423727681001036e-05	0.00037265531295584516	0.29762506
PLIN3	4.3800206	1.1866804551588752e-05	0.00038592517738186724	1.9116825
CD27	4.3713536	1.2347859732509297e-05	0.0004003454705041772	3.4951327
CYFIP2	4.3686604	1.2501089753505927e-05	0.0004042452182054163	3.1419508
YWHAQ	4.368572	1.2506152314597016e-05	0.0004042452182054163	0.8380687
KDM5B	4.3661385	1.2646224400618281e-05	0.0004081525747750383	1.3905904
RNASEK	4.3481884	1.3726669659486917e-05	0.0004410159168997391	0.47059315
Z93241.1	4.3449445	1.3931079255550206e-05	0.00044690818203061436	1.2763076
NSA2	4.339601	1.4274151305035847e-05	0.0004558241255534277	0.6708367
MPPED2	4.3392844	1.42947337319167e-05	0.0004558241255534277	4.615161
AL137857.1	4.3341866	1.463001339592653e-05	0.0004658169983801816	3.2303486
EIF2S3	4.3312283	1.482800155909969e-05	0.00047141519455977767	1.1625298
MAGOH	4.3255706	1.5213739659542724e-05	0.00048295675943106593	0.8334642
HMGN2	4.3234053	1.536389885837945e-05	0.00048699666888058494	0.5628213
EIPR1	4.3229146	1.5398122872421775e-05	0.00048735517168681355	2.560501
COX6C	4.3107047	1.6273526232856764e-05	0.0005135335748466328	0.36791277
AP001059.3	4.3092723	1.6379256496186046e-05	0.0005153408378955341	5.8084803
TMEM256	4.3082337	1.6456330614606516e-05	0.0005162384894425753	0.82611173
LINC00114	4.3068814	1.655721461073826e-05	0.0005186382880055847	7.765145
IGHA1	4.300129	1.706987966648537e-05	0.0005331266822708919	0.34388825
BCAS4	4.296506	1.7351146963299102e-05	0.0005410546469469997	3.3032064
KLHL24	4.296206	1.73745979531149e-05	0.0005410546469469997	2.188567
RNASEH2B	4.2915816	1.774049099775922e-05	0.0005508357708486728	0.905821
STMN1	4.2735114	1.924182574712574e-05	0.0005965807460869058	0.28216904
MIS18BP1	4.259056	2.0529193060348584e-05	0.0006346444872101076	0.75528026
SAP18	4.249716	2.1404189260656555e-05	0.0006607339642741716	0.48769373
AP1B1	4.2403955	2.2312630194421443e-05	0.0006877787414567387	2.1092343
LDLRAD4	4.235708	2.2783246197240822e-05	0.0007012689773793271	2.9522586
PAPOLA	4.23267	2.309333156991767e-05	0.00070876200456072	0.6971258
EIF3M	4.2179947	2.4648455366860242e-05	0.0007532298810312507	0.7207193
NBDY	4.2134843	2.5146100210530174e-05	0.000766235537790496	1.1165785
SRSF6	4.2064204	2.5944711192955924e-05	0.0007894392880729321	1.3214514
TPD52	4.1983643	2.6885005870467972e-05	0.0008145544015085231	2.6792986
CHURC1	4.194353	2.7365152793067142e-05	0.0008279223822983571	1.3040545
MAD2L2	4.1848702	2.8532925271883045e-05	0.0008608039540534475	1.5354855
DEFA3	4.180665	2.9065788525680142e-05	0.0008756377565902138	1.2209028
H3-3A	4.1769876	2.9539513253786907e-05	0.000888650505508902	1.5217168
ITM2C	4.1667085	3.090289772301931e-05	0.0009283527283487256	0.54983646
ESD	4.147623	3.3594499992110144e-05	0.0010049527712126449	0.7850615
ATRX	4.140873	3.459863365106925e-05	0.0010292004743001283	0.8040659
EIF3D	4.0867	4.3755241103108185e-05	0.0012907492691012594	0.6877388
MYCBP2	4.0783296	4.536042535607102e-05	0.001336247765787084	0.94420606
SEC62	4.0774765	4.552710717834265e-05	0.001339302963452517	0.42459968
UQCRB	4.0602736	4.901520200229025e-05	0.001435956379320539	0.3401539
CIITA	4.0327663	5.512406269515598e-05	0.0015948581229569738	2.4150534
PPP1R2	4.032544	5.517630249379108e-05	0.0015948581229569738	0.999952
ARID4B	4.03249	5.518903467470651e-05	0.0015948581229569738	1.1314124
HLA-DMB	4.0260878	5.671250613839323e-05	0.0016344421315142082	0.9417241
LSM7	4.013769	5.9756788467354844e-05	0.0017152053089233065	0.40324837
EAPP	4.0068507	6.153366637445581e-05	0.0017567242283467123	0.91140974
CTBP2	4.002669	6.263199287686672e-05	0.001780908899061602	1.5637275
VPS26B	3.9915652	6.563861649052914e-05	0.0018639088573258536	2.0980866
HHIP	3.9802108	6.885417027783097e-05	0.0019500124469230184	6.0022073
FCMR	3.9779143	6.952242251206227e-05	0.001966319686714166	4.3969765
H2BC4	3.9641776	7.364937239648097e-05	0.0020775179064996736	2.3531895
EVL	3.955485	7.637953483952142e-05	0.0021488311197113506	1.7759528
SH3BGRL	3.9473772	7.901203452924614e-05	0.002219956357202822	0.47094348
XPO1	3.9452147	7.97285143537358e-05	0.0022371316250522516	0.8701982
TBCC	3.9429324	8.049135295254616e-05	0.002255560719298688	1.6839765
RAB11A	3.9310217	8.458565249610878e-05	0.0023609609487398133	1.1527531
MATR3-1	3.8935835	9.877420851125405e-05	0.0027354539594086754	0.843116
SYNGR1	3.8794446	0.00010469523867316377	0.002895660638933056	0.7450395
RAB30-DT	3.8769627	0.00010576860470887577	0.0029215486409780245	1.8487444
SUPT4H1	3.8727233	0.0001076260168607116	0.0029689983821147535	0.9520275
FKBP1A	3.8550954	0.00011568452841209427	0.003178933119892549	0.47497088
TBCA	3.8382804	0.00012389888107103378	0.0033958831204894554	0.49550405
DCK	3.8211148	0.00013284978072486845	0.003617902671238447	1.876998
PFDN4	3.8151836	0.0001360816627943861	0.0037011776035470565	1.1754556
UGP2	3.806936	0.00014069910874944328	0.0038218765568223617	0.90576595
SNORD3A	3.7942464	0.00014809250638495063	0.004012457985097472	1.8418984
ATF7IP2	3.7923236	0.00014924423127303654	0.004038518517743275	1.5504836
HHEX	3.7879045	0.00015192318846664598	0.004100576517128291	1.6247377
RNVU1-15	3.7854311	0.00015344233712195126	0.004136330884976909	2.8521476
CSNK1E	3.7743106	0.00016045073969315243	0.004308872200168761	1.978752
NT5C2	3.7715433	0.00016224097243147518	0.004336492138087066	1.7479801
PXDN	3.7714605	0.00016229478310768276	0.004336492138087066	2.0161867
STRAP	3.7664738	0.00016556945839230788	0.004418440163796733	0.9733316
TSPOAP1-AS1	3.7545745	0.00017363621998369444	0.004622113595535916	3.5782692
SATB1-AS1	3.7542293	0.0001738756625408832	0.004622701833227556	3.1440108
EIF1AY	3.750432	0.00017653010660946121	0.004681569622788816	1.7396302
ANAPC16	3.7460616	0.00017963257189011807	0.0047432230019735415	0.64731187
CTCF	3.744846	0.00018050433484112356	0.004757306936475659	1.290544
TTC7A	3.7404156	0.00018371618033208564	0.004835964652825655	2.367394
PPIA	3.7382874	0.00018527805590881242	0.0048650357668204094	0.25204322
STRBP	3.7247164	0.00019553497891836534	0.00512171609189004	1.8471706
NLRC5	3.7240088	0.00019608407880752378	0.005129781392567311	2.098231
PCMTD1	3.7070627	0.00020967699625746718	0.005458531252631664	1.0940462
ZNF22	3.7022898	0.00021366227298967052	0.005555480298554159	2.0458846
MICU2	3.6975312	0.00021770636731118862	0.0056537200565832365	1.5405107
SKP1	3.6944046	0.00022040264567252713	0.005716760818059731	0.42507723
NDUFA1	3.6879857	0.0002260364272587179	0.0058415173406630265	0.3603234
GIGYF1	3.6792586	0.00023391291040770256	0.0060377350624531865	1.4663099
ST3GAL1	3.6650057	0.0002473330346613333	0.006368675925196002	1.9469956
DDX6	3.6620102	0.00025024386695063545	0.006435836524997661	0.95653236
ATP5F1B	3.6585555	0.00025364091593188716	0.006507465188124618	0.41999492
SYNE3	3.65067	0.00026155705359109374	0.006702478280516835	2.3862367
HLA-DOA	3.64491	0.00026748526579073884	0.006837913603489452	2.4918854
CDCA7L	3.6406965	0.00027190157286416004	0.006942466450477574	1.8044677
EIF3K	3.6316357	0.00028163048525896403	0.007173651246674139	0.26911125
TLE1	3.6075175	0.0003091406372214486	0.00781820714989654	3.1082158
AKAP8L	3.6068757	0.0003099060816158136	0.0078282570663738	1.3434079
SMARCA4	3.6034636	0.0003140047168343748	0.00790362878384653	1.8051945
CSNK1G2	3.6010358	0.0003169518941765324	0.007958972653176702	1.2789489
AC007952.4	3.5782757	0.0003458686086681659	0.008634130795496736	1.6115469
RNU12	3.562525	0.0003673050210317222	0.009137088295115439	2.0263286
INAFM2	3.555869	0.0003767315158010247	0.00934971132972228	2.6675925
PPP1CA	3.5518239	0.00038257094191718107	0.009472527780717725	0.8704076
PPP3CC	3.524773	0.00042384600284462056	0.010470128495356834	3.0098886
SF3B1	3.5231354	0.000426473518291487	0.010522813527310482	0.7628052
LAIR1	3.5189245	0.0004332999896417067	0.010659785612186707	1.4685407
RHPN1	3.5168078	0.0004367701291207187	0.010727094545344764	3.9891782
UCP2	3.5039954	0.00045833321609151	0.011217824134695426	0.68861884
NDUFB1	3.503245	0.00045962627556506353	0.011236541672406133	0.4858115
PSMB8	3.501599	0.00046247507506339566	0.011293205937455066	0.4566357
STAG3	3.4973512	0.00046990295125515826	0.011461428750282067	4.9248996
RALBP1	3.488065	0.00048652977636848716	0.011839819008674318	0.8080266
TAPT1-AS1	3.4866016	0.000489199739335439	0.011891187721057659	5.718097
H2BC7	3.4729848	0.0005147046355635553	0.01246839737334995	3.7832425
SFXN1	3.4702375	0.0005199985053101399	0.012568009328910642	2.070765
EID1	3.461927	0.0005363225938285793	0.01293315787770981	0.36982998
RCN2	3.457391	0.0005454329602424244	0.013108263990278108	1.1571572
NSD3	3.4446216	0.0005718595732475801	0.013727856956436548	0.7611641
CEP135	3.4420397	0.000577345629212238	0.013843928058303373	2.789679
STARD3	3.4382682	0.0005854476406821064	0.014022393997373562	1.9097319
ZRANB2	3.4268708	0.0006105792082096149	0.014575094477452635	1.1455504
TBL1XR1	3.4079363	0.0006545614176404371	0.015520475799101959	0.94097644
REST	3.406099	0.0006589823445832933	0.01560790143312034	1.6384094
MIR5195	3.397726	0.0006794843622893662	0.016022120733406354	7.2563286
CARHSP1	3.3950443	0.0006861749471928545	0.016155025413109557	1.2267857
CD72	3.3944795	0.0006875920257754359	0.016159552261014086	3.9966486
RNU5B-1	3.392548	0.0006924578663519271	0.01625594520909397	2.4550724
PTEN	3.3919833	0.0006938870001346469	0.016271535397865272	1.3190936
FAM133B	3.3832848	0.0007162432144655307	0.016777287366153495	0.7234936
GABARAPL2	3.3781552	0.0007297385211584991	0.017062228460747675	0.4668099
TP53	3.3780098	0.0007301247362106165	0.017062228460747675	1.3043888
WAC	3.3762352	0.0007348503494988939	0.017137644828390322	0.7830353
AL355075.4	3.3688407	0.0007548504381494143	0.017584790765607768	2.781103
NPY	3.361757	0.0007744824309678214	0.01802239258671181	4.8427505
ZMYM2	3.3579457	0.0007852407094305421	0.0182129603586458	1.3340459
CNBP	3.3576176	0.000786173213350475	0.01821472557162446	0.36112368
ZNF720P1	3.3568158	0.0007884560924085697	0.018247739531488432	3.029255
IRF2	3.3517034	0.000803159865334904	0.01854767337221289	0.9403232
BEX4	3.3486993	0.0008119182524794673	0.01871967600072438	1.1608244
GRAP	3.3467338	0.000817696925016711	0.018801725295330193	4.0888515
PRRC2C	3.3430166	0.0008287296944430059	0.01901429543808877	0.38963014
DGKD	3.3422747	0.0008309476287696582	0.019044639133945968	1.583903
IGBP1	3.3311913	0.0008647513437384402	0.019776770247282673	1.0028344
FTX	3.3233232	0.0008895180673650033	0.020277770390982053	1.1220585
TCOF1	3.3211436	0.0008964941456438832	0.020414918612098237	1.4152327
ATP5PO	3.3119488	0.0009264851734227609	0.021075308185592195	0.37986597
CD22	3.30646	0.0009448289791155804	0.021446710306093145	3.8636894
P2RY14	3.2971995	0.0009765414198824944	0.02211933914747686	2.7450325
ARPC3	3.2945633	0.0009857472061005578	0.022304103538885917	0.21599703
USP34	3.290036	0.0010017461885610157	0.02261798267994081	1.4063338
NUTM2A-AS1	3.2890573	0.0010052355083562208	0.022672697801938983	1.1945126
RSF1	3.2882729	0.001008041190772291	0.022711894159465954	0.77750224
CHURC1-FNTB	3.2848523	0.0010203588729139367	0.022940816985207738	1.2132016
DDAH2	3.2729785	0.0010642055814343637	0.023876148218910848	0.79004383
DTNBP1	3.2721741	0.0010672386168575005	0.02391896537612453	1.5607836
GPSM1	3.2643714	0.0010970724264759177	0.024561719409175047	3.1703045
KRT10	3.2605658	0.0011119020508052364	0.02486755490912363	0.41503036
RAP1B	3.2552052	0.0011331048269649499	0.025315132946131847	0.4367202
MYLK	3.246019	0.001170310651418124	0.02606422748168804	2.7063735
NRIP1	3.2385929	0.0012012089872509874	0.02666859493720381	2.2458432
GAB2	3.2351665	0.001215717761249297	0.026962566281555054	2.8720083
PHB2	3.2303681	0.0012363094997041124	0.027362192246833266	0.49089783
AUTS2	3.1989408	0.0013793346980016188	0.030369637362108105	2.1069708
RNU5E-4P	3.1972804	0.001387299642390116	0.030506628846397467	2.3103218
KMT2A	3.1953177	0.0013967699438544293	0.030626700964783357	1.1185433
NRM	3.1920884	0.0014124817161734527	0.03093931371914847	2.1904716
DIPK1B	3.190927	0.0014181704481978253	0.03096824154283321	2.4913583
CCT7	3.1900828	0.0014223209668220635	0.031027020147013817	0.618877
MED30	3.1864195	0.0014404552146311915	0.03132621877299674	1.2955166
NCOR1	3.1828935	0.00145811263550632	0.03158105666454574	0.6706925
PKIG	3.168304	0.001533311689671663	0.03314228285327906	1.5648044
SKIL	3.1662898	0.0015439692186386138	0.03333876275251236	1.8214294
CREB1	3.1629548	0.0015617661408125689	0.033688847919820006	1.4288832
ASXL1	3.1613772	0.001570250688919071	0.033837550053312786	1.1601306
AHDC1	3.1568153	0.001595023119307526	0.03433658575359491	2.388761
SYPL1	3.154396	0.0016083062302071442	0.03458752801847902	0.7815191
XXYLT1-AS2	3.128843	0.0017549607473094438	0.03758938583537217	5.392064
LINC02580	3.1252797	0.0017763605386984008	0.03793314487708462	5.3016067
AP001059.1	3.1238647	0.001784925119953032	0.038077805793662024	7.6112494
SEC63	3.1168096	0.001828196343638766	0.03884506296988303	0.7945875
PCBP1-AS1	3.1027193	0.001917514693216274	0.04062113546814435	1.4264731
ING4	3.0941548	0.0019737440233421025	0.04164639050839601	1.5897975
SMARCE1	3.085465	0.0020323409876247156	0.042713300855523786	0.7722296
FAM76B	3.0783672	0.0020813832895891613	0.04370083039118645	1.3675779
RSRC2	3.066174	0.0021681713381451868	0.045210623716676446	0.49552655
MRFAP1	3.0607479	0.00220784984324007	0.04594790441866247	0.5873823
SMARCB1	3.0483322	0.002301154636989111	0.04779615036535293	0.7824541
PAFAH1B3	3.0446177	0.002329762777733593	0.04829602779689647	1.213126
ATP5F1EP2	3.0423925	0.002347056931079199	0.048607160532739516	0.6382859
UBE2D3	3.0313034	0.0024350050342802215	0.0502816719166078	0.40345454
BCL7A	3.0299966	0.002445564095408581	0.05045073011177993	2.095901
EIF4H	3.0179605	0.0025448212210808243	0.052094131425570796	0.6702197
IGHD	3.0104003	0.0026090355776257905	0.05335728625050283	2.834751
RNF44	3.009011	0.0026209963823328563	0.05355040543308119	1.9747907
MACROD2	3.007984	0.002629870245310698	0.05368014419147143	5.6873217
STAG2	3.0057359	0.002649390074435552	0.05402672818137081	0.7945647
PPP3CA	3.004626	0.002659074874477379	0.05417228305101472	1.155119
AL021155.2	3.0006607	0.002693946203919994	0.054777764637833994	1.0599735
TTC19	2.999839	0.002701223399389463	0.05487327648673781	1.0627028
OGA	2.9990401	0.002708315667419014	0.05491245560565778	0.9149909
MPRIP	2.9924643	0.0027673499791314397	0.056055968291568184	1.4103609
RNU5A-1	2.9919536	0.002771983249053524	0.05609639555101751	1.785126
H2AC20	2.9758778	0.0029215130016888267	0.058954136653623965	0.96779925
AL035696.3	2.9602468	0.0030739261300631046	0.06144674328976708	6.243985
GABPB1	2.9598331	0.003078056428337331	0.061471532558034454	2.337071
AFF1	2.959177	0.0030846183171978703	0.06154479079594888	1.2638568
MED13L	2.951714	0.0031601554969196734	0.06293384575279451	0.63871664
H4-16	2.9505785	0.0031717944182881636	0.06304756587156164	2.712604
HNRNPD	2.9481251	0.0031970773811326554	0.06343156606278959	0.29314992
HNRNPC	2.9402454	0.0032795240162873125	0.06482546124759744	0.28652388
MBNL1	2.9372385	0.003311493533847118	0.06539661650083041	0.47695833
DMTF1	2.935447	0.0033306764748055645	0.06571443222879365	1.4699823
CSNK2B	2.9314215	0.0033741466650005565	0.06644881983138597	0.46853417
CDS2	2.9307597	0.0033813433894957752	0.0665289477809303	2.3333118
STMN3	2.9279437	0.003412116958289852	0.0670723803935923	2.5964732
PNPLA7	2.9210114	0.003488971259862533	0.06845657723802234	5.2936144
ATP6V1G1	2.9192455	0.0035087986776415206	0.0687821558292696	1.3844117
PPP1R35	2.9161243	0.0035440918948414055	0.06934617342353436	1.5264193
SUMO2	2.9141102	0.0035670391051530062	0.06966699240358061	0.9202492
ANP32A	2.9073374	0.003645196401124742	0.07099787752337193	0.41548407
CLK4	2.904339	0.0036802923686985907	0.07161586311971667	1.5101347
HPCAL1	2.8913045	0.0038364632503226515	0.07433309697455098	1.4014199
PDCD7	2.8912275	0.0038374037556094306	0.07433309697455098	1.1288362
NAV1	2.8891761	0.003862526255628913	0.07475165689806311	2.7607424
FUBP1	2.8885458	0.0038702781594048257	0.07483358742943749	0.9662033
SMARCD1	2.8825974	0.0039441112982365155	0.07598487608894243	1.0995702
RBBP4	2.866068	0.004156050833779438	0.07971344901218924	0.80063504
ZMYND8	2.8660421	0.004156387933354547	0.07971344901218924	1.2002314
ZNF738	2.857267	0.004273064934985399	0.0818773136055896	2.3431902
SPIN1	2.8537748	0.004320313287476854	0.08270813979419012	1.254485
DDX3X	2.8527193	0.004334688827396884	0.08287513490986195	0.32888237
SELENOH	2.8525624	0.004336829430376433	0.08287513490986195	0.73941135
PHACTR1	2.8498578	0.00437387657680813	0.08350806186008271	2.0307627
CBFA2T3	2.8495014	0.004378782833274958	0.08352004162801364	1.3671144
INTS3	2.8492417	0.004382357725180462	0.08352004162801364	2.5340846
SATB1	2.84745	0.0044071006192632906	0.08384134442854287	1.7826358
COPS9	2.8415132	0.004489998592358985	0.08518981272157293	0.38929152
PET100	2.8390284	0.0045251129097258124	0.08570314022881416	0.5970765
ZFX	2.8351114	0.004580970723678707	0.08652989904255988	1.6210387
CNOT1	2.8338192	0.004599536694312717	0.08680350128778809	0.95203614
VAMP2	2.8233347	0.004752691796123591	0.08925927752574778	1.2705638
APOLD1	2.816813	0.004850274183516983	0.09065068682708498	3.0840333
N4BP2L1	2.815384	0.004871901037374592	0.09097494571020211	1.3768394
AC007381.1	2.8114896	0.004931267846965853	0.09200275073431292	4.043201
SERPINI1	2.8073359	0.00499531294652047	0.09287177540169919	3.9720826
CHCHD2	2.797853	0.005144353213096094	0.09555916898632387	0.19626354
UXS1	2.7966433	0.005163650600291966	0.09583393073089862	1.3893864
U47924.2	2.7893655	0.005281140584251293	0.09750397490142426	1.8607918
PIK3R1	2.784647	0.005358602810468848	0.09884832886024451	0.5097681
PIK3CD	2.78069	0.005424349881194299	0.09997443468208106	1.9571619
SLC25A36	2.7761683	0.005500373606985012	0.10111274524370287	0.8995056
THUMPD3-AS1	2.770069	0.005604445048404825	0.10267092311328356	1.0703031
RNU5F-1	2.76749	0.005648980970060451	0.10339774204149374	1.9750862
SRP9	2.7642832	0.005704800406602151	0.10432966452968284	0.5062579
VDAC2	2.7600865	0.005778603761723554	0.1054979600069513	0.64357907
FAM107B	2.7592478	0.005793457218786873	0.1056784233159331	0.64937943
USP15	2.7535706	0.005894904278407412	0.10734479374781443	0.41797906
AL592293.2	2.7491345	0.005975287068648742	0.10862254757529069	0.951026
DTX1	2.7472744	0.006009283858058387	0.1090541453729043	5.980679
POLR1D	2.7426841	0.006093927728441045	0.11040183037156098	0.45494485
UHRF2	2.7338116	0.006260583907795113	0.11313199586652017	1.4984653
FAM160B1	2.7264285	0.00640238309139951	0.11549812211278725	1.8210369
BAZ2B	2.7260234	0.006410246401178181	0.11554197517513451	0.89802796
IP6K1	2.7178156	0.006571444305407135	0.11814712504793268	1.7564911
ATP5PF	2.7159956	0.00660768148155517	0.11859812441451216	0.26749864
TMSB10	2.7142496	0.006642610650190506	0.11903259070106764	0.24254094
RNVU1-19	2.7069747	0.006789942553282897	0.12125548964380682	1.8654959
AC016739.1	2.704915	0.006832187800066007	0.12180536657133605	0.24740995
CIC	2.697426	0.006987777749130014	0.12447491201528163	2.0966861
OIP5-AS1	2.6932383	0.007076170272092534	0.12583868354275593	1.1354612
ARFGAP2	2.691786	0.007107052231983347	0.12617687305680617	1.0171205
ERP29	2.6912754	0.007117941213579374	0.1262647970572308	0.25148308
MILR1	2.68448	0.00726427628892491	0.12864603862543206	2.3780408
RPAIN	2.6830933	0.0072944625897224885	0.1290731487693907	0.77612746
NUP88	2.6804001	0.007353417884207172	0.13000818369011002	1.9299638
FUS	2.65861	0.007846372831514025	0.13792107748220808	0.38017252
EIF3I	2.657817	0.007864860541612097	0.13813189005742996	0.51197386
AAK1	2.654559	0.007941216513747478	0.13912828173879332	0.9350096
ERICH1	2.6479487	0.008098177965603737	0.14164485785396866	0.65292364
SRSF10	2.6445653	0.008179591415893413	0.14271675949519033	0.3793966
HDGF	2.6311483	0.00850968976477114	0.14811177709240372	0.5006863
LGALS9	2.611104	0.009025043892487533	0.15593311011317412	0.72278917
PRPF38B	2.6106162	0.009037926816734107	0.156028949241167	0.92056745
PDCD4	2.609512	0.009067143558886792	0.15640638795941866	0.579348
GDI2	2.6069303	0.009135796364819319	0.15722909118428077	0.373768
HLA-DRB6	2.605464	0.009174994395811478	0.1577550168185241	0.6636348
DDIT4	2.6024399	0.00925630513148725	0.15902451845040574	0.5886763
SLC35D1	2.6001575	0.009318096881078807	0.15982790529327834	3.514604
WTAP	2.5973418	0.009394839436182181	0.16075530166384458	0.99927783
KANK2	2.596195	0.009426257525854386	0.16116324060884	2.0937018
NDUFAF6	2.5895534	0.009610050765004676	0.16364785405995555	1.8402883
SERINC5	2.5879302	0.009655455816686094	0.1642895118120772	2.0823717
HLA-DPB2	2.585622	0.009720341633481828	0.16512935000201676	3.8513384
GFOD1	2.5848005	0.00974353429887691	0.16539124581230086	2.5489204
H1-0	2.5819647	0.009823960533787642	0.16649069051245366	1.6458982
BRAF	2.5763505	0.009984941791872001	0.1688153632522461	1.3205862
RERE	2.5729299	0.010084167242487943	0.17022234371466355	1.1317762
HNRNPUL1	2.570151	0.01016541777811155	0.17145778804334225	0.57568485
PRKCB	2.569378	0.010188127849891749	0.1717046681769791	1.3770424
DYRK1A	2.563835	0.010352280340511827	0.17405743127458184	1.3274086
AL355001.2	2.5576556	0.010538043542919366	0.17659758774943787	2.9993591
YTHDF2	2.5555158	0.01060305369746357	0.17729272727307602	0.7349834
SNRPB2	2.546806	0.010871384539509926	0.18106771947598796	0.46821454
RIPOR1	2.5416508	0.011033031464624652	0.1833293329852357	1.6093066
HNRNPA1P48	2.5405667	0.011067295243803345	0.1837551151759979	1.1474218
PSIP1	2.540176	0.011079671402649914	0.18381710691338612	0.8419132
GTF3A	2.5287359	0.011447411697148144	0.18952134674781318	0.34621924
SPSB3	2.5283766	0.011459140153166004	0.18952134674781318	0.9411824
SNX17	2.5260057	0.011536759595722654	0.19036100841072548	0.6345289
AL391069.2	2.5192046	0.011762032237412094	0.19377743118320515	2.5411017
TRIM59	2.5182803	0.011792947394206513	0.19413637625958075	2.1406817
FRG1HP	2.5160434	0.01186805280470912	0.19522166674660346	0.5611028
FNBP4	2.5131707	0.011965143217548631	0.19666663917623017	0.77633786
NSMCE1	2.5105631	0.012053875938420288	0.19781935751100393	0.94713795
PRXL2A	2.5069427	0.012178039640475835	0.19939547737742921	2.058516
TCEA2	2.5037334	0.012289060195919957	0.20084190960827794	1.2639793
CTNNB1	2.5035708	0.012294709027691846	0.20084190960827794	0.5971765
SSNA1	2.4965982	0.012539089150001598	0.20420665170856356	0.5799387
DHPS	2.490131	0.012769605665179477	0.20764276979564397	1.0748369
CD19	2.4849787	0.012955921913179956	0.21035076577971334	4.778099
NIPBL	2.4757154	0.013296954819854573	0.21555863724351135	0.96843517
MAX	2.469091	0.013545677654829653	0.21908974755937025	0.676123
BTF3L4	2.4680297	0.013585904451403232	0.21957340560554356	0.7165212
PFDN1	2.4649658	0.013702635914931233	0.22095630271013827	0.75895125
AC025257.1	2.455691	0.014061399091528764	0.2262268511934382	0.89024985
KTN1	2.4511693	0.014239298553710759	0.2285702950482069	0.35390216
ATP6V1H	2.443398	0.014549680918645669	0.23284963390419466	1.4265949
NDUFA3	2.441204	0.014638376403812714	0.23374146226178127	0.4644927
PWP1	2.4405365	0.014665460086793806	0.23399825250263875	0.82899445
AL132996.1	2.437832	0.014775636214403552	0.2355794652504866	9.032344
AP001816.1	2.4351132	0.014887128032144715	0.23700174110455532	2.6070933
KAT6A	2.4309623	0.01505877889148086	0.23955509965811997	1.3645548
FPGS	2.4214308	0.015459539078511273	0.2451968207761792	1.7081934
TCEAL8	2.4210258	0.015476778315925902	0.24528733085054247	0.72392446
INO80	2.4183984	0.015589001828810631	0.24688196567161083	2.603852
SF3A2	2.4082992	0.016027042070886788	0.2523161789827469	1.0237585
SDHA	2.4064875	0.01610675155487929	0.2531962297270714	0.9300888
DHRS12	2.4035718	0.016235771720527172	0.2550247312097416	2.2736778
AP001267.1	2.403318	0.01624705020401523	0.2550247312097416	1.658445
ARAP2	2.3999517	0.016397237225832112	0.25694370301674896	2.3852358
LRIG1	2.3997662	0.01640554556851498	0.25694370301674896	4.525248
RSL24D1	2.39818	0.01647676510077967	0.2577571767426576	0.72291064
TGIF1	2.3979547	0.016486906426457937	0.2577571767426576	1.7823371
SPIDR	2.3978007	0.016493841626158117	0.2577571767426576	1.0487535
AC008763.2	2.3946624	0.016635673023466968	0.25978276764766445	1.0522804
TASOR2	2.3923316	0.016741707094765707	0.2610552552775453	1.3585813
AC002454.1	2.3903403	0.01683276633781601	0.2618907177116571	1.7930083
B4GALT1	2.3896043	0.016866534222534785	0.2620411368729674	0.7353338
EPC2	2.37906	0.017356846493843343	0.2686774149036056	1.3049706
GNPTAB	2.3783383	0.017390862085280963	0.2690081786849752	1.2686855
PHF11	2.3735712	0.017616997909456186	0.27211033299653137	0.8552135
POLR2G	2.373012	0.01764369067544191	0.27232485992450944	0.56282145
AC087627.1	2.3662963	0.01796705636604915	0.27671348432259185	8.488116
ROCK1	2.3637202	0.0180924710976386	0.27844339202291996	1.091656
SLC38A2	2.3602767	0.018261304320270712	0.2806356080836978	0.7067441
POLR2C	2.358839	0.01833221026986414	0.281521862981762	0.97235143
TIA1	2.3573697	0.018404912615177037	0.28243440578080836	1.1382124
HLA-E	2.3550959	0.01851792228556503	0.2839637268144792	0.3990406
CDC42SE2	2.351293	0.018708290874017954	0.286676252593291	0.9712797
PCNP	2.350788	0.01873369694409902	0.2867338405433145	0.6998265
PABPN1	2.3499951	0.018773661192213954	0.28705751250697237	0.8542987
UBE2I	2.348697	0.018839231222107344	0.28766046394975897	0.3817124
CLEC2D	2.3485315	0.018847603976439965	0.28766046394975897	2.6980736
CEP57	2.3484118	0.018853669036906485	0.28766046394975897	0.7910259
EPB41L4A-AS1	2.34385	0.01908584766540812	0.2903697381942527	0.79593235
SUZ12P1	2.3377533	0.019400045650030964	0.2945178950253452	0.7270528
NPPC	2.3353827	0.019523440596036258	0.2961797846198967	5.9904485
COMT	2.3308809	0.01975964552533922	0.2993361115943304	0.38644266
AL713998.1	2.3303673	0.019786746969223733	0.29952773581791564	5.857587
ATM	2.3297284	0.01982051853366183	0.29961805877217723	1.1158328
ABCG1	2.3289864	0.019859780771162287	0.299789997458673	3.3831859
FJX1	2.3289807	0.01986008305135504	0.299789997458673	5.959653
PSMA6	2.32671	0.01998070997139839	0.30139696480969674	1.5301791
HLA-F	2.317441	0.020479724624257928	0.3084867301935849	0.45446077
TPT1-AS1	2.3169103	0.02050861849940017	0.3087033311137595	1.5586275
AL050309.1	2.3153641	0.020593017458710495	0.30975451791323444	3.0327435
SPTA1	2.310614	0.020854184367823	0.3130188054475846	3.214771
MXI1	2.3093045	0.020926687438477587	0.3138855536875739	1.1010635
EIF2A	2.299836	0.02145752036265069	0.32111576419112403	0.6251517
BAHCC1	2.2997901	0.021460107502685788	0.32111576419112403	2.2847977
MRPL1	2.299605	0.021470620552259928	0.32111576419112403	0.9109876
EZH2	2.299365	0.021484213289010744	0.32111576419112403	1.5233978
BTN2A2	2.2981613	0.02155261404003488	0.32191190169768386	2.4151409
NUB1	2.2952855	0.021716765591540465	0.3232287525307727	0.67440814
ZNF75A	2.2928522	0.021856524537314296	0.3248542420573989	1.5944711
SNHG1	2.2861478	0.022245613473111273	0.32948603966546214	1.0390983
PPP2R5C	2.2845244	0.022340723515385363	0.33043452604223317	0.76299715
NIBAN3	2.276314	0.022827225548738696	0.3368774248818145	1.4100771
PAX5	2.2720032	0.023086313047684374	0.33974300831514165	4.583474
ING3	2.2713528	0.023125628572861334	0.33991637464836744	1.4009491
JAK1	2.2702687	0.02319128365600178	0.34041091240821386	0.8689849
CDC73	2.2687197	0.023285382163577745	0.3415564091290587	0.94149363
RBM26	2.2624233	0.023671261039967625	0.3464996910248255	1.4432877
DDX54	2.261057	0.023755739888989217	0.34741584063208397	1.1528654
JADE2	2.255508	0.0241014626507264	0.35207006120762346	1.9883523
SAP30	2.2443874	0.024807481381832884	0.3610376825602824	1.004263
ACADM	2.2426643	0.024918467460309107	0.3622630788881165	0.9701959
RBM6	2.2406244	0.025050405533548054	0.36368669558125305	0.7961517
VPS4B	2.2388728	0.025164188477467972	0.364727270439509	0.6026854
CUL3	2.238582	0.025183133798964287	0.364727270439509	1.122689
DCP1A	2.2381883	0.02520878535554682	0.364727270439509	1.4461274
BRD7	2.2379372	0.02522515467659588	0.364727270439509	0.5716131
GLS	2.2375035	0.02525345062906726	0.36488834336252146	0.8306914
INTS10	2.2362683	0.025334207508510405	0.36531068440576797	0.94361466
SPRY1	2.234234	0.025467672948684513	0.3667379390288225	0.42716146
VEZT	2.2317665	0.025630407410688418	0.36833319947157567	1.0031987
PIK3IP1	2.2314467	0.025651543863551445	0.36838803945568915	1.8170091
SIAH1	2.2299948	0.025747791561218872	0.3695207683640784	1.656802
FLI1	2.2281775	0.025868682898118785	0.3707554019946687	1.4935209
MEX3C	2.2252018	0.026067685669087168	0.3731047150039131	2.0078557
MEF2D	2.2173765	0.026597374107780816	0.37966412744858397	1.17693
WSB1	2.2170997	0.02661627431432574	0.37967910019543544	0.37567446
PLEKHM1	2.2152853	0.02674048493840027	0.3811952909884955	1.4515496
LINC01507	2.2129717	0.026899598908205157	0.3828507626050556	6.7887616
ARF5	2.212812	0.026910615924329213	0.3828507626050556	0.40751472
CPSF6	2.2106094	0.027062890843047676	0.38450275573866466	0.8738256
TAX1BP3	2.2094626	0.02714247833417105	0.38537608256974903	1.3670514
ZCCHC10	2.2065098	0.02734831660126031	0.38700688342794776	1.1284901
EFHC1	2.2057369	0.027402434400029867	0.38751487849350746	1.6672535
LINC01374	2.2001593	0.027795585737090848	0.3920320378263828	3.8195324
NFIA-AS2	2.19784	0.027960506706827343	0.3938357729453714	6.1272454
MZT2A	2.1941257	0.028226380856002112	0.3962685771790818	0.46097112
AL008729.1	2.1904283	0.028493190451241976	0.39922376001809323	1.6832626
AL031733.2	2.1890903	0.028590278134286214	0.40032035920877784	5.6970263
ZNF207	2.1885426	0.028630106171183653	0.40035090608475027	0.666799
GUK1	2.187701	0.028691393396811538	0.400944314163459	0.2579426
WDR13	2.1860862	0.028809298142936184	0.40232761799219285	1.0290477
UQCRC2	2.1828597	0.029046149434600304	0.4045727258182802	0.5070343
HDAC5	2.181516	0.029145278330626818	0.40568777801970013	1.6462388
ZNF101	2.1798613	0.02926774776877185	0.4063514532918282	2.715071
FYTTD1	2.1796274	0.029285098089931905	0.4063514532918282	1.0165864
CBX5	2.1783063	0.029383230072586163	0.407134801572531	0.7647198
H2AZ2	2.1772823	0.029459514038892996	0.4079260443315203	0.2542235
UTRN	2.1747575	0.029648295820076206	0.41000624434148303	1.1941242
PHYKPL	2.170906	0.02993827163854611	0.41374730310606705	1.2797695
SFPQ	2.1699817	0.030008227504909	0.414232307495154	0.8006525
DNAJC19	2.1678991	0.030166359195369145	0.4153773481086153	0.6699788
GNG5	2.167554	0.030192639128850465	0.4153773481086153	0.91381323
BTK	2.167514	0.03019568105174401	0.4153773481086153	1.0707811
CDIPT	2.1670775	0.030228942092912	0.4153773481086153	1.0449703
BORCS6	2.1670375	0.030231987158405967	0.4153773481086153	2.051179
AC119673.2	2.1665668	0.03026789529350059	0.4156022369254126	3.2346575
TUT4	2.1636913	0.030488058076988563	0.4180854334232558	0.63573885
MAPKAPK5-AS1	2.1621506	0.030606567255378657	0.4191109620340062	1.1723319
UBAC2	2.1550128	0.03116083637012412	0.42457388133002555	0.9566216
TNFRSF21	2.1481829	0.03169922227061211	0.43163300798569076	2.4166062
OSBPL10	2.1454015	0.031920764801919896	0.43353942948405766	1.885924
ARPP19	2.1445541	0.03198851326314331	0.4341823156310115	0.8414392
CASP2	2.143393	0.03208155390368088	0.4351674553427224	0.99265283
CREBRF	2.1385403	0.03247291879947114	0.4396349522253034	1.6472594
ZNHIT3	2.1376646	0.032543987096541174	0.4399546377534523	1.0762073
GTF2A2	2.1374848	0.03255858760750077	0.4399546377534523	0.4432863
LRRC28	2.1328716	0.03293525872743435	0.4441978553416622	2.1251705
PRCD	2.1299846	0.033172891523200534	0.4471192837813385	3.742289
CELF1	2.128347	0.033308326377525926	0.44866041401114565	0.8414103
NCBP2	2.1236796	0.03369693810903853	0.45303424566443773	1.0590845
AP2M1	2.1223104	0.03381168937268961	0.4542898428728587	0.38553533
PCM1	2.12152	0.03387806234511842	0.45489426011257805	0.389035
PQBP1	2.1177	0.03420047795103475	0.458644366671222	0.62649363
MCFD2	2.115181	0.03441452593846686	0.4603538064058187	0.83679414
SMG1	2.1137373	0.03453770048912477	0.4617110947223097	0.859206
LSM14A	2.1133237	0.03457306689320888	0.46189356768320333	0.57170415
TCF12	2.1113153	0.034745216920353816	0.4636110531235918	1.1491957
CPNE2	2.110508	0.034814625280734646	0.4642459342294327	2.2036896
H2AC15	2.1100345	0.03485539338124011	0.4644983470085187	2.353379
STK24	2.1070588	0.03511247860338217	0.4661718523191856	1.2187793
LINC01226	2.105698	0.0352305909220548	0.46744818360647755	3.5350704
PAN3	2.10543	0.03525390667824606	0.4674659234037502	1.4526082
SECISBP2	2.1040206	0.035376654994429844	0.4688012928825722	1.0774473
ZHX2	2.0989766	0.0358189574808008	0.47407181497147	3.1472383
BTG3	2.0977728	0.03592522414544646	0.4751825823069034	0.79443926
SPOP	2.0930798	0.03634203289537539	0.47980055720157616	0.794732
HDAC7	2.0873342	0.03685794401887221	0.48480619130327335	1.1080567
DIPK2A	2.0866208	0.0369224177449975	0.4853540809754956	1.0228784
CHD6	2.082256	0.0373190931003333	0.48935868751602285	0.82107425
DCP2	2.0817168	0.037368344988828545	0.48970260601811105	0.71813524
FAM214A	2.0795457	0.03756721573120212	0.49170283777657714	1.8906294
ING1	2.0781963	0.037691277245875066	0.493023232313971	1.455074
FADS3	2.0764475	0.03785257731987987	0.4945248568897574	1.6006638
CERK	2.075603	0.037930674450380834	0.49498192213622977	1.7429744
TRIM28	2.069983	0.03845394154971974	0.5002513625126913	0.54203475
CNOT7	2.0668647	0.038746899340199974	0.5031183162800447	0.73333555
PRKCH	2.065661	0.038860514718001574	0.5036711075790222	1.9769195
PNRC2	2.0652444	0.038899888248993174	0.5038743746454541	0.49016234
CHST15	2.0603974	0.03936057475926207	0.5089118933463496	1.7950962
ZNF85	2.0597384	0.03942356705626332	0.5092835965966898	1.8410854
PPP4R3B	2.0549655	0.0398823433742665	0.5140954916528935	1.2171589
UNK	2.0543036	0.03994631952055962	0.5146082797594079	1.7521391
HNRNPH3	2.0518444	0.040184787258633184	0.5173669734890249	0.5369402
COX7A2	2.04813	0.04054726725514536	0.5212491469886746	0.1833083
ODC1	2.0480015	0.04055984476309448	0.5212491469886746	0.44557992
LITAF	2.0449033	0.04086438653466405	0.5248457954141121	0.51488036
PITPNM2	2.0419421	0.041157276898371405	0.5282885469833805	3.6162128
MARCHF7	2.03372	0.041979823557543094	0.5372255518925295	0.66061664
R3HDM2	2.0333407	0.0420181163065217	0.5373922523893024	0.6492235
TNK2	2.0298202	0.04237481541177725	0.5416285751160398	2.0060995
TLK2	2.0295606	0.0424012209094882	0.5416405810954382	0.89079213
EHMT1	2.028485	0.04251076343104235	0.5425813956532195	0.88128626
AL121601.1	2.0266821	0.04269493661993087	0.5434342351701436	3.49845
WASF1	2.0261116	0.04275335962718494	0.5434403471185106	2.2915432
GPBP1L1	2.025929	0.04277206925931576	0.5434403471185106	0.92381585
AC026124.2	2.025019	0.04286542835637219	0.5443013705741374	2.4566674
MED10	2.02422	0.04294751555352618	0.5450183223794441	0.55482936
LINC00544	2.0190334	0.043483734539408354	0.550509255903974	8.730635
MAGED1	2.0177698	0.04361525096625189	0.5511900016644156	1.109641
TSPYL1	2.0148797	0.04391725011543408	0.5546769552881041	1.1415894
TNFRSF14	2.0130882	0.044105356793378	0.5562172716661555	0.67647314
KRTCAP2	2.0129712	0.044117661258206986	0.5562172716661555	0.5241074
THOC7	2.0126345	0.04415309027957857	0.5563341689314909	0.8223927
AC103724.4	2.0117188	0.0442495907727715	0.5570455537127047	4.7080164
PHF5A	2.0113535	0.044288120331382935	0.5570455537127047	1.0094167
SPG7	2.0097759	0.04445490561834099	0.5588128768300795	0.99056786
TRAPPC2	2.0062013	0.04483477319625978	0.5622587211740856	1.8466297
UBA52	1.9999535	0.04550528175876521	0.5699951930077605	0.18806393
PSMB10	1.9976313	0.045756647702118014	0.5728064390678917	0.71332186
SNRPA1	1.9961877	0.045913491038761946	0.5739662833527791	0.6713639
ZNF493	1.9960337	0.04593025597190418	0.5739662833527791	2.0766065
PPP1R12A	1.9952577	0.046014779979085825	0.5741085671931757	0.498719
UPF3A	1.9946557	0.046080438431306533	0.5741085671931757	0.86263794
NOXA1	1.9943932	0.04610909145260107	0.5741085671931757	3.7334027
PTOV1	1.9941964	0.04613059106366719	0.5741085671931757	0.7434155
CCT8	1.9938569	0.0461676899375941	0.5742342674167771	0.32376158
NCK2	1.9933691	0.04622104407203589	0.5745618856622625	1.4092478
TIAL1	1.9928414	0.04627882484048321	0.5749441153809798	0.6359548
ARMH1	1.9925189	0.046314147868420176	0.5750470583849554	0.6011093
XPA	1.9911696	0.04646225090090117	0.5765493666343449	0.8203602
KPNA4	1.9864337	0.04698517898910759	0.5816808916876189	1.1421812
ZCCHC3	1.9850501	0.0471388936298662	0.5832444029165935	1.5911345
C8orf33	1.9833328	0.04733027810098036	0.5845921515271494	1.0007675
PPP4C	1.9811902	0.047569947461685747	0.5872113827989519	0.51733613
INKA1	1.980323	0.04766725377209425	0.5880712415769562	2.3853712
SARAF	1.9798237	0.047723344762271976	0.5884219244920363	0.2314029
ENTPD4	1.9739524	0.048387147618202245	0.595570742298347	1.8399734
CNOT8	1.9726573	0.04853462365276738	0.5966953239715083	1.1501336
CCDC28A	1.9715503	0.048660959410301824	0.5979029149033562	1.6742109
H1-5	1.9696475	0.048878785015032615	0.5998862541746848	0.8050447
CDC26	1.9687431	0.04898259593084659	0.6004673388202745	0.8002516
ZFAND1	1.9677589	0.04909578650032964	0.6012664957626859	1.0674273
SDR39U1	1.9674108	0.04913586581266214	0.6013065189697993	1.2878709
CCM2	1.9590063	0.0501120510977933	0.6121959878224961	0.76422167
CAPN1	1.9580934	0.05021905836266637	0.6130484594623924	0.7830138
HNRNPL	1.9579194	0.05023947834138652	0.6130484594623924	0.92897856
NPIPB4	1.9539481	0.05070735028656838	0.6184028860349902	1.8481141
GKAP1	1.9515375	0.05099314375617423	0.621175930441048	1.830786
MXD3	1.9507387	0.05108814159491232	0.6217698465913006	1.784858
ZNF292	1.9445251	0.05183216028146174	0.6295934991584293	0.7781313
GCC2	1.9357611	0.05289696814294529	0.6399690645234944	0.44511166
SCMH1	1.9336128	0.0531607422875134	0.6417002427429753	2.6857398
BCL10	1.9276276	0.05390146843128202	0.6495355989036472	1.3679276
TTC3	1.9268117	0.05400310857104013	0.6503449804147341	0.3831993
KMT5B	1.9248631	0.05424648389955882	0.6522150740868946	0.99740416
CSNK1A1	1.9230801	0.054469993188896136	0.6545323644828429	0.4389788
KDM4C	1.9211601	0.05471152646587064	0.6570634988156988	1.6847534
PSD3	1.9196767	0.05489876063343711	0.658568381225366	2.7001116
GRHPR	1.9136086	0.05567019134911462	0.6665375892075719	0.5455079
TPM4	1.9114461	0.05594728010561856	0.6692591116796407	0.30973202
CELF2	1.910884	0.0560194817008172	0.6697461249548516	0.6818064
RBM17	1.9056776	0.05669205072753161	0.6767040306153225	0.41801205
NCK1	1.9053952	0.05672872662499976	0.6767040306153225	1.0742052
PIN4	1.9044194	0.05685557713061438	0.6778370347483392	0.8182728
SLC35E3	1.9005196	0.05736496752047245	0.6820430665772028	2.841872
RHOH	1.8961005	0.0579467582444215	0.6881460642661088	1.8902248
NMI	1.8927369	0.05839285966033339	0.692284131614064	0.6693372
ISCA1	1.8904946	0.05869184261130203	0.6954411144845588	0.88939655
ARHGEF2	1.8898242	0.058781479653493646	0.6957280415971933	1.2017392
AL353759.1	1.8885689	0.05894961637212707	0.6973300281528202	3.426405
RBM22	1.8860812	0.05928401256189601	0.700834033669599	0.7348515
DBNL	1.8852824	0.05939172080045837	0.700834033669599	0.4728841
AC008755.1	1.8836163	0.05961689198065973	0.7024884629011922	1.3617215
AL645941.2	1.8819788	0.05983889715923454	0.7047140108968768	2.487208
GRAMD1B	1.8810202	0.05996916926958653	0.7058573664608943	1.3758348
PIK3CG	1.8761303	0.06063737718239036	0.7120866283841675	1.174266
UBE2E1	1.8756796	0.06069928333539403	0.7120866283841675	0.88629115
BRF1	1.8740364	0.0609254101565346	0.7139518174211209	1.7733209
BOD1L1	1.8734344	0.0610084192630728	0.7145308751686649	0.4825159
RUBCNL	1.8696715	0.06152945035726834	0.7194446836991426	2.8539474
AC105285.1	1.8687671	0.06165521921682883	0.7203414871483583	4.5634212
ABCA1	1.868633	0.06167388443731066	0.7203414871483583	2.4534106
RBM25	1.8683021	0.06171997180931103	0.7204413770062165	0.381477
HSD17B11	1.8680853	0.061750182438400136	0.7204413770062165	0.4356972
HIF1A	1.8645391	0.062246024793315216	0.7249201335730768	0.30664778
CXXC5	1.8641226	0.062304480895744245	0.7249201335730768	0.575148
SETD5	1.8632754	0.06242353517902726	0.7255349669150564	0.68009615
ZNF254	1.8628645	0.062481326166192966	0.7255349669150564	1.8441232
LRCH4	1.861558	0.06266542787137433	0.7267344522335119	0.9974774
INPP5D	1.8595039	0.0629557521130611	0.729306041226959	0.8146109
BEST3	1.8553016	0.06355317195345755	0.7354256878553258	5.9722347
SLC8B1	1.8524088	0.06396714623807633	0.7386087043092536	2.0707114
STK26	1.8514445	0.06410563153884649	0.7398061189363679	1.7473747
MAP4K5	1.8496072	0.0643701762794171	0.7424562252098277	1.1013755
CARD19	1.8491251	0.0644397478090836	0.742855824472303	0.8009287
AC073111.4	1.8464291	0.06482991674648475	0.7469488078445201	3.5849152
PPP1R37	1.845251	0.06500104603481821	0.7477053802674681	2.0686777
FRYL	1.8438245	0.06520872282288688	0.7493268177364949	0.9464043
SMIM26	1.8430485	0.06532192862336098	0.7497523864182669	1.636613
ATF4	1.8430343	0.06532401112836239	0.7497523864182669	0.44899362
LSM2	1.8428203	0.06535525527384771	0.7497523864182669	0.4312008
PHKB	1.8421499	0.06545323340383526	0.7504716017607397	1.0450733
IDI1	1.8395936	0.06582791289539347	0.7543609263858425	0.7340788
CREBZF	1.8389518	0.06592227812634219	0.7548068941212481	1.2946956
ELOC	1.8377535	0.06609872483566422	0.7558353648009367	0.43839696
RNMT	1.8362787	0.06631645648327819	0.7575105869725263	0.40373912
IGHG3	1.8345641	0.06657030654474352	0.7591870508847989	-0.51491797
SYVN1	1.8323417	0.06690053052249471	0.7613201624841841	1.5696888
AP001931.1	1.8313831	0.06704337916986229	0.7621302146252277	0.4973468
TXLNGY	1.830145	0.06722826352573175	0.7638236842568314	1.3455627
C11orf58	1.829155	0.06737638750967477	0.7650979102740377	0.264341
ZNF431	1.827643	0.06760314703274989	0.766854044927764	1.2512894
GIMAP2	1.8253436	0.06794919579960702	0.7703685743400009	1.6221205
PSMB6	1.8229871	0.06830534153855722	0.7735816342830529	0.2802016
POGZ	1.822622	0.06836066828344584	0.7737961967645607	0.72032124
BRD4	1.8203425	0.06870686149193798	0.775650868934198	0.43588609
RPP38	1.8100208	0.07029255787547085	0.7897794048882142	1.1067541
PSPC1	1.8082036	0.07057482697148222	0.7921139814545939	1.0144218
PPP2R2C	1.8079212	0.07061877947139211	0.7921892513591977	8.133777
RNF125	1.8020984	0.07152992495276916	0.7995891526383214	1.6806421
AL357060.1	1.8020613	0.07153575915646401	0.7995891526383214	2.2499344
MAT2B	1.801582	0.07161119010626042	0.7999466399002378	0.92026556
GPC2	1.799722	0.07190455154114972	0.8019600979175214	3.6407337
GPATCH8	1.796929	0.07234689181560948	0.8064706719214874	0.8586441
DNM1L	1.7965981	0.07239945126712986	0.8065011172825	0.7041553
CCNDBP1	1.7963128	0.07244478622738758	0.8065011172825	0.64973766
DPPA4	1.7952914	0.07260727595712407	0.8076799959895773	1.8749878
ARF1	1.7932545	0.07293223849977173	0.8104471163279232	0.21721184
ASCC1	1.7906156	0.07335500207641577	0.8138693475030186	1.0058552
SARDH	1.7886243	0.07367534242723785	0.8161462802525634	4.3544774
MUC20-OT1	1.7871808	0.07390828069865787	0.8167084583418797	1.5346216
SLC12A6	1.7867614	0.07397606523976176	0.8167084583418797	1.4352989
PAG1	1.7826333	0.07464602078225306	0.8221672830798333	2.3307598
FBXL15	1.780759	0.07495184123669078	0.8242764794535554	0.86594176
METTL23	1.7698467	0.07675268162035463	0.84103698371114	0.72384244
TPGS1	1.7657157	0.0774435499085012	0.8472977690349343	0.6817385
AL135790.1	1.7651138	0.07754464361291646	0.8479676221095734	0.3817515
PDE6D	1.7645917	0.0776324090613315	0.8484911142474099	1.4235426
EBPL	1.7637872	0.07776781256568725	0.8486627016211401	0.5587994
GIHCG	1.7627145	0.0779486496928309	0.8501999129829848	0.21823809
SCARB1	1.7617645	0.07810909174634512	0.8512085189802774	2.255849
TRGV9	1.7614564	0.07816118470865964	0.8512085189802774	5.0610943
DOK3	1.7605264	0.07831859983846157	0.8520502813116312	1.3444519
PLEKHF2	1.7565438	0.07899560521055154	0.8576608102211438	1.9421668
WIPI2	1.7559276	0.07910078076891804	0.858164634484804	0.65197015
TIFA	1.7479937	0.08046511602260349	0.8696201995349357	2.077783
ZNRD1	1.7474916	0.0805520993229771	0.8700021264858594	0.7297314
DHX30	1.7466471	0.08069856163480926	0.8708156810810544	1.0965923
WDR48	1.7382169	0.08217259776785987	0.884478229718933	1.2185824
CYTIP	1.736491	0.08247706507107572	0.8868577841237156	1.0070516
OTUD1	1.7337265	0.08296662087076546	0.8897030937201685	1.4680465
AC117382.1	1.733193	0.08306136705783417	0.8897030937201685	1.6909758
CTDNEP1	1.7331103	0.083076068165464	0.8897030937201685	0.5678341
TTC14	1.7329277	0.08310851944923779	0.8897030937201685	0.9110239
AP1AR	1.7328736	0.08311815540091094	0.8897030937201685	1.7397034
CUL5	1.7293445	0.08374745695687812	0.8954859775182971	1.0591829
PGK1	1.7284601	0.08390576695310996	0.8963293607863866	0.2032477
ZNF830	1.7281634	0.08395893164423089	0.8964470467576038	1.4989762
AIRE	1.7278695	0.0840116120112003	0.896559445994089	6.7798443
AKR1B1	1.7258612	0.0843723965921222	0.8997294203206304	0.8435461
GPR132	1.7201525	0.08540471563536334	0.9068062017783399	3.1266692
UQCRH	1.720124	0.08540990017769694	0.9068062017783399	0.11215166
RTF1	1.7200955	0.0854150849744574	0.9068062017783399	0.5680339
PNPLA8	1.7197617	0.08547576600200016	0.9068062017783399	0.5140513
KLF16	1.7196904	0.08548873655101602	0.9068062017783399	1.548751
AC138409.2	1.7189914	0.08561593214464733	0.9068552095540359	1.1473122
MFF	1.7163211	0.08610328033220228	0.9115632998435094	0.6081179
RAB37	1.7151287	0.0863216435751866	0.9130823557605378	1.4447036
RO60	1.713066	0.08670039460342412	0.9165162489166141	0.63556594
CASC15	1.7109834	0.0870841728478072	0.9196590229890821	2.758316
CHMP1B-AS1	1.709982	0.08726918935165393	0.9211555277023957	0.85488945
SCHIP1	1.7089522	0.08745980773919491	0.9219288599387753	5.6192255
PHF14	1.7088838	0.0874724923295147	0.9219288599387753	0.82627535
ZNF124	1.7065301	0.08790942833102444	0.9252766630614705	1.876837
COPB1	1.7057313	0.08805812121898317	0.9253498914063997	0.5789582
PSMA2	1.7035004	0.08847447358357947	0.9292659647650132	0.26409748
SMG1P1	1.698234	0.08946361609522925	0.9368791977988336	1.5725664
SRP19	1.6977433	0.0895562306393251	0.9373875341869121	0.57467043
UBL5	1.6970043	0.08969583654941361	0.9383869884749032	0.15899108
TCP11L2	1.6962312	0.08984209821321924	0.9394550574714651	2.104276
FOXN3	1.6959546	0.08989449681026264	0.9395410578169416	0.47656637
SUN2	1.6932899	0.09040029568528524	0.9443634032074321	1.6131597
AC245100.8	1.6921089	0.0906252246927804	0.9457840549512986	1.9149032
CARD8	1.6908706	0.09086150295494906	0.9473202482102018	0.9454329
ZNF430	1.6871191	0.09158044118401935	0.9538649631723741	1.458469
NUTM2B-AS1	1.6849538	0.0919974790150912	0.9558839185012089	0.9905878
APBB1IP	1.6834846	0.09228131717459119	0.9583649096613184	1.0070142
UPF3B	1.6811167	0.09274024488537368	0.9612535421379204	1.5129067
GFI1	1.6805204	0.09285609451318805	0.9619855207993164	3.227427
AC010883.3	1.6782924	0.09329003478046664	0.9648550064645598	1.2902842
R3HDM1	1.6781669	0.09331453045736045	0.9648550064645598	0.85848886
ZNF33A	1.6767775	0.09358599788195231	0.9671917341842777	1.100134
H2AC19	1.6704869	0.0948230638465437	0.9771277834070435	2.0723789
SECISBP2L	1.6672832	0.09545811491459408	0.9812946573796526	1.0107176
CBX4	1.6663674	0.0956402634143411	0.9822176545435156	0.6667006
AC245407.2	1.6649837	0.09591599995134525	0.984099084884304	0.91674656
DNMT3A	1.6606531	0.09678314142663937	0.9919134620595236	1.4319797
CCT4	1.6604819	0.09681754418334529	0.9919134620595236	0.4340865
PFDN2	1.6600654	0.09690129841321983	0.9922935560668139	0.27602568
MAPRE1	1.6592865	0.09705806280803486	0.9924977441187353	0.8469965
MID1IP1	1.6586275	0.09719086793359336	0.9924977441187353	0.78097254
TBCB	1.6585763	0.09720122248339487	0.9924977441187353	0.43065903
SLC22A16	1.6568588	0.0975480329340999	0.9955609944699475	2.282588
ATP9B	1.6563709	0.09764672568927875	0.9960902679545658	1.1361105
SNRPA	1.6532013	0.0982898848665841	0.9999551774135642	0.6132666
STT3B	1.6521516	0.09850366490346564	0.9999551774135642	0.57767576
RBM34	1.6482717	0.09929694492406865	0.9999551774135642	0.6443029
ATF6B	1.6463288	0.09969607920485066	0.9999551774135642	0.71917456
AC087752.3	1.6460607	0.09975127300185196	0.9999551774135642	5.899662
PARVG	1.6458068	0.09980355341783079	0.9999551774135642	0.4865845
ZFC3H1	1.645025	0.0999646438253613	0.9999551774135642	0.7582992
SMDT1	1.6429567	0.10039188696728757	0.9999551774135642	0.3002846
TRMT12	1.6424204	0.10050291286363387	0.9999551774135642	2.6737244
AC002464.1	1.6397958	0.10104764307751353	0.9999551774135642	3.386621
URM1	1.6385975	0.10129710501120728	0.9999551774135642	0.81092983
GUCD1	1.6380441	0.10141249815937248	0.9999551774135642	1.1425998
AC243960.1	1.6378558	0.1014517794791471	0.9999551774135642	3.3491776
CTPS1	1.6370856	0.1016126019777427	0.9999551774135642	1.5692617
Z93930.2	1.6366062	0.10171277171503833	0.9999551774135642	1.0233235
TRAF3IP2-AS1	1.6331543	0.10243655650128024	0.9999551774135642	2.2180338
SNORD3B-1	1.6325694	0.10255958615830221	0.9999551774135642	1.8418174
TFAM	1.630929	0.10290529668595554	0.9999551774135642	0.5428186
SH2D3C	1.6303242	0.10303299225334935	0.9999551774135642	1.7178115
DEDD2	1.6283729	0.10344585045469237	0.9999551774135642	1.0516993
AC092279.1	1.6271775	0.10369940509534933	0.9999551774135642	2.0232444
NFKBIA	1.6241392	0.10434610510243579	0.9999551774135642	0.14169419
H2AC16	1.6227413	0.10464472178641832	0.9999551774135642	1.5618143
AL391840.1	1.6220081	0.10480161425216926	0.9999551774135642	4.997413
VASN	1.6215858	0.10489204948116403	0.9999551774135642	1.2648203
SERBP1	1.6209868	0.10502047604131413	0.9999551774135642	0.173316
RMND5A	1.6197772	0.10528015576543338	0.9999551774135642	1.613404
FMR1	1.6187673	0.10549735392165041	0.9999551774135642	0.87281615
STX16	1.6172038	0.10583428256559961	0.9999551774135642	1.0070008
MACF1	1.6130986	0.10672309163020627	0.9999551774135642	0.5286635
CIAO3	1.6084142	0.10774450033193952	0.9999551774135642	1.7719303
AL022328.3	1.6064086	0.10818416214008383	0.9999551774135642	2.755641
UBE2M	1.6056126	0.10835904407618238	0.9999551774135642	0.36825544
MKLN1	1.6043802	0.10863027030200216	0.9999551774135642	1.1622814
SP110	1.6037697	0.10876482652798794	0.9999551774135642	0.49597743
TBC1D1	1.6020209	0.10915099078514427	0.9999551774135642	0.94386846
ABTB1	1.601901	0.10917748865830634	0.9999551774135642	0.8348245
TRAM1	1.6017898	0.10920209838073065	0.9999551774135642	0.20436524
ANKRD11	1.6007543	0.10943136858047538	0.9999551774135642	0.23663726
RNF152	1.5998441	0.10963316245685462	0.9999551774135642	4.5271435
CHD4	1.5970654	0.11025111846453509	0.9999551774135642	0.5335572
SMARCA5-AS1	1.5964777	0.11038216739250743	0.9999551774135642	0.6486087
PRMT1	1.5964607	0.11038598619485711	0.9999551774135642	0.27771795
TMED4	1.5963408	0.11041272073341848	0.9999551774135642	0.90301865
HMBOX1	1.5954936	0.11060191809577793	0.9999551774135642	1.0888351
ADGRE2	1.5947404	0.1107703083876583	0.9999551774135642	1.4028264
EFCAB2	1.5943124	0.11086607483909591	0.9999551774135642	1.178142
RF01882	1.5925493	0.1112613222747067	0.9999551774135642	2.2662637
AMFR	1.5905238	0.11171678105300967	0.9999551774135642	0.9117317
CFDP1	1.589494	0.11194892282043815	0.9999551774135642	0.3495818
ARHGAP27	1.5855713	0.11283660561880328	0.9999551774135642	1.1932296
ZSCAN2	1.5843017	0.11312507729695293	0.9999551774135642	2.4334042
AC006001.3	1.5842446	0.11313805594900996	0.9999551774135642	1.3476957
CALCOCO2	1.582359	0.11356766093211475	0.9999551774135642	0.42722172
TFIP11	1.5807071	0.11394502622895786	0.9999551774135642	1.3061292
MCTP2	1.5805701	0.11397635466305486	0.9999551774135642	1.8364547
PLEKHA3	1.57877	0.11438882390289723	0.9999551774135642	0.6553017
LINC01873	1.5743281	0.11541162294323956	0.9999551774135642	1.1453067
HBP1	1.5720544	0.11593795065901177	0.9999551774135642	0.70293146
CPT1A	1.5710444	0.11617233156413218	0.9999551774135642	0.8807067
CCDC174	1.5700117	0.11641239409585911	0.9999551774135642	1.0165641
ZNF131	1.5681345	0.11684974869709051	0.9999551774135642	0.75292957
ST6GALNAC4	1.5640976	0.11779463096797729	0.9999551774135642	0.88577676
UIMC1	1.5635813	0.11791592703639592	0.9999551774135642	0.83001155
PDS5B	1.5623546	0.11820448190185381	0.9999551774135642	0.85343415
EPS15	1.5613503	0.1184411062855837	0.9999551774135642	0.8709374
UBE2L5	1.5612049	0.11847542071931046	0.9999551774135642	0.35052973
KCTD18	1.5604745	0.1186477835142633	0.9999551774135642	1.7655611
DUSP11	1.5602777	0.11869427429566046	0.9999551774135642	1.3034577
ATF7IP	1.5596329	0.11884664845577811	0.9999551774135642	0.6416384
BCAS2	1.5563607	0.1196223462884554	0.9999551774135642	0.6897618
RNF7	1.5558814	0.1197362942612356	0.9999551774135642	0.31448695
SEPTIN1	1.5545976	0.12004193093076379	0.9999551774135642	0.81741315
AC083799.1	1.5541925	0.12013850298387121	0.9999551774135642	2.5596864
AL671883.2	1.553174	0.12038156201032546	0.9999551774135642	3.2286592
MIEN1	1.5523211	0.12058542853777564	0.9999551774135642	0.50800014
OXLD1	1.5505266	0.1210151803568633	0.9999551774135642	0.68474793
SNHG14	1.5497221	0.12120823991723342	0.9999551774135642	1.5533519
LINC01237	1.547163	0.12182393596507868	0.9999551774135642	4.8385715
CNOT4	1.5454828	0.12222955057710864	0.9999551774135642	0.6200109
KANSL1-AS1	1.5441904	0.12254222629784539	0.9999551774135642	1.043395
GPATCH2L	1.5437596	0.1226465903044737	0.9999551774135642	0.9990508
CSNK2A2	1.5420507	0.1230612748017087	0.9999551774135642	0.9197356
RSRC1	1.5408525	0.12335269104227378	0.9999551774135642	0.68610126
OGT	1.5379368	0.12406405458718489	0.9999551774135642	0.77690136
ZNF669	1.5373092	0.12421760356645264	0.9999551774135642	1.7919359
ZC3HAV1	1.5363193	0.12446009348859381	0.9999551774135642	0.713448
AC060780.1	1.5352495	0.12472256528135048	0.9999551774135642	2.1158476
ZNF91	1.5346646	0.12486623223367962	0.9999551774135642	1.0475591
FNBP1	1.5332867	0.1252052357425791	0.9999551774135642	0.4982241
PSMB7	1.5331782	0.125231937238492	0.9999551774135642	0.3266858
TERF2IP	1.5290958	0.12624069381033895	0.9999551774135642	0.46635413
ZNF675	1.5283825	0.12641757415953367	0.9999551774135642	1.7601829
ABCD4	1.5282314	0.12645509757393456	0.9999551774135642	1.1516788
HELZ	1.5275753	0.12661803551643894	0.9999551774135642	0.66962904
DYRK2	1.5230335	0.12775033430471272	0.9999551774135642	2.0703118
MYO18A	1.5222318	0.1279510087612937	0.9999551774135642	1.4019868
AL009031.1	1.521142	0.12822420476287288	0.9999551774135642	1.7745715
MRPS5	1.5204374	0.12840109370312205	0.9999551774135642	0.5763643
ZC3H13	1.5195472	0.12862480341269214	0.9999551774135642	0.5744127
KIAA0040	1.5189767	0.12876836631200028	0.9999551774135642	1.5862936
AL031777.3	1.516469	0.12940080182797034	0.9999551774135642	2.62322
DMAP1	1.5155561	0.12963163802577948	0.9999551774135642	0.95820725
BNIP2	1.5136076	0.13012539840626125	0.9999551774135642	0.32313535
SF3B4	1.5122381	0.130473276707947	0.9999551774135642	0.71638733
ALDH5A1	1.5099958	0.13104448508380445	0.9999551774135642	2.6178634
TTC9C	1.5098875	0.1310721498222937	0.9999551774135642	1.3237774
ZBED5-AS1	1.5057565	0.13212969992944432	0.9999551774135642	1.8922331
ZBED5	1.5038394	0.13262273706347757	0.9999551774135642	1.0628929
SLC66A2	1.5012004	0.13330372556598608	0.9999551774135642	0.563897
CAND1	1.5006527	0.13344541526467188	0.9999551774135642	0.8073943
SPINT2	1.4954177	0.13480547080295113	0.9999551774135642	1.2440263
AC107223.1	1.4922425	0.13563560311088166	0.9999551774135642	3.270357
AC106795.1	1.4902939	0.1361469708657089	0.9999551774135642	1.3085425
PPP2R1A	1.4877777	0.13680953204813695	0.9999551774135642	0.6199019
DNAJB6	1.4877292	0.13682232689546137	0.9999551774135642	0.2858736
PPP4R2	1.4868476	0.1370550529971653	0.9999551774135642	0.5260874
PPM1A	1.4854212	0.13743227910455957	0.9999551774135642	0.9800281
BZW2	1.4850732	0.13752444367427846	0.9999551774135642	0.64400786
STK32C	1.4845967	0.13765068063057467	0.9999551774135642	1.1627437
BISPR	1.4845454	0.13766429234095506	0.9999551774135642	1.987543
MCUB	1.4833386	0.13798446635982642	0.9999551774135642	0.53638387
TRPT1	1.480828	0.13865238810651695	0.9999551774135642	1.1736884
FAM204A	1.4804201	0.13876116023105423	0.9999551774135642	0.37425607
NUMA1	1.478503	0.13927319349591966	0.9999551774135642	0.6816169
SC5D	1.4777983	0.13946176136495503	0.9999551774135642	1.2850122
PAK2	1.4774075	0.13956643633973195	0.9999551774135642	0.3998974
XRN1	1.4769368	0.1396925850002033	0.9999551774135642	0.58881855
RCBTB1	1.4748856	0.14024331188197126	0.9999551774135642	2.7665794
ITGA4	1.4737673	0.14054427179269882	0.9999551774135642	0.43813595
DGKA	1.469642	0.1416587419010862	0.9999551774135642	1.6816373
TTC32	1.4683125	0.14201934321255055	0.9999551774135642	1.0941533
RAB3GAP1	1.4643584	0.14309602842268979	0.9999551774135642	1.7428306
CBFB	1.4567899	0.14517441042865561	0.9999551774135642	1.0862709
NID2	1.4545103	0.1458048623771168	0.9999551774135642	2.029357
AC016168.2	1.453723	0.1460231268686796	0.9999551774135642	6.873915
NUTF2	1.4533349	0.14613076941577838	0.9999551774135642	0.4669527
USE1	1.452462	0.14637318716194814	0.9999551774135642	0.71627426
LZIC	1.4516004	0.14661273761611535	0.9999551774135642	0.61395353
BCL7B	1.4514436	0.146656396618136	0.9999551774135642	0.72468114
AMD1	1.4503537	0.14695990268044545	0.9999551774135642	0.46750206
RN7SL2	1.4499772	0.14706489071248166	0.9999551774135642	1.330569
CREB3L4	1.4497888	0.14711740623085662	0.9999551774135642	1.9530841
FAM43A	1.4496092	0.1471675480550712	0.9999551774135642	1.4827894
LY6H	1.448719	0.1474160620821247	0.9999551774135642	6.5720773
RF01956	1.447809	0.14767048328353063	0.9999551774135642	1.3794677
MRPL9	1.4477776	0.14767926241007567	0.9999551774135642	1.1148925
AC087854.1	1.4465537	0.14802195956210648	0.9999551774135642	4.1618867
AL161912.3	1.4465138	0.14803315338099382	0.9999551774135642	2.3376288
CCNL2	1.4457035	0.1482603676476199	0.9999551774135642	0.5244886
AC239798.2	1.4439946	0.1487404710884551	0.9999551774135642	3.3005283
PPM1K	1.443892	0.14876936315678957	0.9999551774135642	0.786719
IFT20	1.4406397	0.14968649659185773	0.9999551774135642	1.1273714
BLK	1.4391676	0.15010303551752655	0.9999551774135642	2.7477047
LINC01238	1.4364488	0.1508746640919416	0.9999551774135642	4.0416026
ZNF544	1.4342151	0.15151090569074122	0.9999551774135642	1.518699
FBXO34	1.4315876	0.152261895149742	0.9999551774135642	0.8080008
H2BC3	1.4284322	0.15316747529270885	0.9999551774135642	2.2246106
THAP12	1.4277533	0.15336288150545935	0.9999551774135642	0.65690875
H2BC17	1.4276563	0.15339081214776118	0.9999551774135642	2.2622232
ADNP	1.4271855	0.1535264128513049	0.9999551774135642	0.75415194
TRG-AS1	1.4271628	0.15353298974690704	0.9999551774135642	1.3229256
CCDC81	1.4266578	0.15367855837203934	0.9999551774135642	5.4487805
ADAM10	1.426441	0.153741094604891	0.9999551774135642	0.7820119
RNPC3	1.4258704	0.15390575608029353	0.9999551774135642	0.6121424
CCDC186	1.4249632	0.1541678437968782	0.9999551774135642	1.3989607
TFDP2	1.4224269	0.15490233498973308	0.9999551774135642	0.4964257
CLHC1	1.422387	0.15491392299824738	0.9999551774135642	3.2281082
AKAP9	1.4203016	0.1555198976453521	0.9999551774135642	0.4207565
ZNF43	1.4166698	0.1565794646254214	0.9999551774135642	1.3074498
MED19	1.4130125	0.15765204621809492	0.9999551774135642	0.7273743
UGT3A2	1.4123992	0.15783246911228965	0.9999551774135642	3.706095
ZC3H12D	1.4104792	0.15839824587151186	0.9999551774135642	3.6410522
NSMCE4A	1.4082996	0.15904238396494752	0.9999551774135642	0.68803406
SF3B6	1.4076177	0.15924429438438126	0.9999551774135642	0.23046416
DLST	1.4058803	0.15975966243666506	0.9999551774135642	0.86422354
ZMYM5	1.4052384	0.1599503881166645	0.9999551774135642	1.6335602
NACA3P	1.4040517	0.1603034720541492	0.9999551774135642	1.0351771
FCRL1	1.403655	0.1604215808428885	0.9999551774135642	4.395586
SLC44A2	1.4019234	0.1609381217127791	0.9999551774135642	0.5739238
JTB	1.4012245	0.16114696576993826	0.9999551774135642	0.21506748
YY1	1.3998494	0.1615584319029395	0.9999551774135642	0.20967321
ERH	1.3993872	0.1616969034702912	0.9999551774135642	0.17575173
MMADHC	1.399159	0.16176531753258427	0.9999551774135642	0.62590706
QRSL1P1	1.3990078	0.16181065388157156	0.9999551774135642	4.5110183
STAG3L2	1.3980007	0.16211285579659152	0.9999551774135642	1.7009587
SMG7	1.3973446	0.16230998695427112	0.9999551774135642	0.87049127
DIS3L2	1.3967968	0.1624746870957069	0.9999551774135642	1.3953841
RBM33	1.3965458	0.16255021678705672	0.9999551774135642	0.8165928
H2BC18	1.3926345	0.1637303585521096	0.9999551774135642	2.721917
ZNF136	1.3910483	0.16421079336287292	0.9999551774135642	1.2708572
WDSUB1	1.3875649	0.1652695747534857	0.9999551774135642	2.005924
RIMKLBP1	1.3868289	0.16549395369982856	0.9999551774135642	3.446368
NOL12	1.3865064	0.16559230035542227	0.9999551774135642	0.89928424
ZNF775	1.3859644	0.16575776111060914	0.9999551774135642	2.0917377
ENSA	1.3835024	0.16651086706325235	0.9999551774135642	0.6675217
ZNF581	1.3825182	0.16681265363537445	0.9999551774135642	0.88295656
RAD21	1.3806353	0.16739112970473347	0.9999551774135642	0.42503074
GTF2I	1.3805867	0.16740604972975348	0.9999551774135642	0.56496024
KLHDC3	1.3804014	0.1674631060970314	0.9999551774135642	0.7095664
BCL2L2-PABPN1	1.3801931	0.16752720220081152	0.9999551774135642	1.1154115
SREK1	1.3774315	0.16837887723318834	0.9999551774135642	0.40047058
CRLF3	1.3764187	0.168692029882339	0.9999551774135642	1.0671285
ZBTB44	1.3760935	0.16879268422826554	0.9999551774135642	1.180665
IPO11	1.3744731	0.16929486179821118	0.9999551774135642	2.0747159
ABI1	1.3713892	0.17025368490103843	0.9999551774135642	1.3077066
PDHB	1.3704562	0.1705445268645338	0.9999551774135642	0.5956129
SNHG32	1.366796	0.17168925500773136	0.9999551774135642	1.4953309
AC093110.1	1.3631215	0.17284421909053926	0.9999551774135642	3.254457
CASP7	1.359507	0.1739860105757841	0.9999551774135642	1.504665
DOK4	1.3588992	0.17417851324026945	0.9999551774135642	3.128254
SLC44A1	1.3584685	0.17431507859013673	0.9999551774135642	2.239226
IFT80	1.3583629	0.17434855381622216	0.9999551774135642	1.8630776
CCNB1IP1	1.358246	0.17438565359227742	0.9999551774135642	0.71356255
YPEL1	1.3582003	0.17440013315263692	0.9999551774135642	2.6938376
NEMF	1.3581718	0.1744091833337268	0.9999551774135642	0.4543918
PIK3CA	1.3576925	0.17456127881357708	0.9999551774135642	1.3997715
CDK11A	1.3551877	0.175357770186104	0.9999551774135642	0.542166
TARDBP	1.3548082	0.17547865930289663	0.9999551774135642	0.55363214
SUMO1	1.3543261	0.1756323599626468	0.9999551774135642	0.34044933
ATXN3	1.3531821	0.1759974597541214	0.9999551774135642	0.83616865
STXBP3	1.3522093	0.17630837614247508	0.9999551774135642	0.7103115
AK9	1.3512051	0.1766297513805274	0.9999551774135642	2.1923878
PRKCE	1.3500354	0.1770046306557802	0.9999551774135642	1.8480959
ENG	1.3500211	0.17700920600990255	0.9999551774135642	0.5666336
WNK1	1.348084	0.17763135784123552	0.9999551774135642	0.4803915
UBE2L6	1.3471682	0.17792604884999697	0.9999551774135642	0.3468504
RBBP6	1.3469486	0.17799679206041852	0.9999551774135642	0.44905075
FAM24B	1.3461983	0.17823857935302034	0.9999551774135642	2.6262844
EMC4	1.3431572	0.17922110278660575	0.9999551774135642	0.42309305
PHC2	1.3419646	0.1796074671890343	0.9999551774135642	0.5914219
CCNQ	1.3418591	0.17964169671328556	0.9999551774135642	1.1010371
Z97192.3	1.3411201	0.17988143916279953	0.9999551774135642	2.6036904
PIK3C2B	1.340541	0.1800695115585489	0.9999551774135642	3.5542493
CD96	1.3398621	0.18029019624697706	0.9999551774135642	2.2779264
MIR181A1HG	1.339126	0.1805296527550505	0.9999551774135642	1.6920063
TMEM161B-AS1	1.334222	0.1821311343507871	0.9999551774135642	0.996548
NAE1	1.3333148	0.18242854587298363	0.9999551774135642	0.6593983
H3C10	1.3325416	0.1826822844332856	0.9999551774135642	2.8016965
RBIS	1.3325074	0.18269352613524537	0.9999551774135642	0.2025455
FRG1	1.332476	0.18270383147921698	0.9999551774135642	0.51524466
TTBK2	1.3308071	0.18325250946393068	0.9999551774135642	1.6791444
RBCK1	1.3302792	0.18342627686505752	0.9999551774135642	0.35655677
ZNF37BP	1.3278543	0.18422623676759353	0.9999551774135642	1.8435057
RFX5	1.3275434	0.1843290064216846	0.9999551774135642	1.6758726
HECTD1	1.3267075	0.18460546915603715	0.9999551774135642	0.6747157
NPIPB5	1.326057	0.1848208127909361	0.9999551774135642	1.2286072
EEF1A1P19	1.3250728	0.18514701505809306	0.9999551774135642	0.7319896
ARID4A	1.3240571	0.18548406426346997	0.9999551774135642	0.940878
AC124944.2	1.3239545	0.1855181731378477	0.9999551774135642	4.2926917
CDK6	1.3238175	0.18556365885212645	0.9999551774135642	0.73818195
CAMK1D	1.3230643	0.18581397770274122	0.9999551774135642	1.9362937
EWSR1	1.3224738	0.1860104249867146	0.9999551774135642	0.38039166
PRKACB	1.3219745	0.1861766233316391	0.9999551774135642	0.9063992
SDCCAG8	1.3217806	0.18624123286033523	0.9999551774135642	0.65016145
CIR1	1.3208791	0.1865416945764885	0.9999551774135642	0.41134357
VSIG10	1.3183827	0.1873755379047244	0.9999551774135642	2.0638301
LINC02202	1.3175954	0.18763912598764276	0.9999551774135642	2.5159507
AL162253.2	1.3162117	0.1881029780953839	0.9999551774135642	2.8345912
RICTOR	1.3147055	0.18860891654726653	0.9999551774135642	1.0893576
UBA7	1.3144315	0.18870101308536602	0.9999551774135642	1.1265516
BLOC1S4	1.3140521	0.18882865995855314	0.9999551774135642	0.8132857
LYSMD2	1.3140179	0.18884018010045167	0.9999551774135642	0.79034173
ECD	1.3100325	0.19018486118172273	0.9999551774135642	1.0174083
KRR1	1.3098812	0.19023601477760566	0.9999551774135642	0.47809368
HERC2	1.309111	0.1904967658729524	0.9999551774135642	1.0138224
USP7	1.305328	0.19178116400328504	0.9999551774135642	0.7942659
GRAMD1A	1.3039529	0.1922496166720693	0.9999551774135642	0.93813795
TRDMT1	1.3038132	0.19229728652075728	0.9999551774135642	1.9759054
AKT3	1.3034195	0.19243158707798835	0.9999551774135642	1.3231871
TMEM123	1.3033967	0.19243937473132133	0.9999551774135642	0.43488976
ATG13	1.3031884	0.19251044777020931	0.9999551774135642	0.91865426
ARL6IP4	1.3026663	0.1926887019729253	0.9999551774135642	0.30233893
IDH3B	1.3013027	0.1931548780048522	0.9999551774135642	0.5223736
NRDE2	1.3003556	0.193479152765755	0.9999551774135642	1.0812867
POLE3	1.2998563	0.19365024155750998	0.9999551774135642	0.3462246
LDHB	1.299317	0.19383514220189346	0.9999551774135642	0.0061779055
ITGA5	1.2988977	0.19397904340085959	0.9999551774135642	1.6226344
RNU11	1.2965926	0.19477141093269124	0.9999551774135642	1.8686167
ZNF32	1.2965184	0.19479694727991714	0.9999551774135642	1.178942
PRELID3B	1.29639	0.1948411506077572	0.9999551774135642	1.0018666
LRRC8C-DT	1.2948923	0.19535739985572387	0.9999551774135642	2.3771427
PTBP2	1.2939537	0.19568142681295997	0.9999551774135642	1.9644598
ARIH1	1.2901194	0.19700920337787486	0.9999551774135642	1.0333908
ZNF92	1.2899112	0.19708151060433754	0.9999551774135642	1.8572383
AC110611.2	1.2868643	0.19814159750326665	0.9999551774135642	5.174182
TMEM69	1.2856147	0.19857755609420757	0.9999551774135642	1.3738265
TLK1	1.2827561	0.1995775225416656	0.9999551774135642	0.50986594
PLEKHJ1	1.2799203	0.20057313479639094	0.9999551774135642	0.40074715
AOX2P	1.2798748	0.2005891903396707	0.9999551774135642	4.855592
CMPK2	1.2790674	0.20087332780359213	0.9999551774135642	2.0948045
MAP2K3	1.278999	0.20089743776927815	0.9999551774135642	0.44829336
RASSF1	1.2753814	0.20217425205986828	0.9999551774135642	0.656697
NONO	1.2729452	0.20303751526085156	0.9999551774135642	0.26954317
ARL2BP	1.2718924	0.20341134716708265	0.9999551774135642	0.56279373
TSPAN13	1.2712705	0.20363243713556056	0.9999551774135642	1.1624309
ABHD8	1.2710879	0.20369737748490213	0.9999551774135642	1.7492329
ZNF451	1.2706857	0.20384050237850349	0.9999551774135642	0.9004831
WDR20	1.2678556	0.2048495212130702	0.9999551774135642	1.1460629
CALCOCO1	1.2663236	0.20539724682580263	0.9999551774135642	0.8754642
H2BC6	1.2662551	0.20542175100726112	0.9999551774135642	2.5141737
TSPAN33	1.2649571	0.20588671147209525	0.9999551774135642	1.4516305
BCL2L1	1.264766	0.20595524270740884	0.9999551774135642	1.2140287
PRDX6	1.2643095	0.2061189664223514	0.9999551774135642	0.12702842
WDR45	1.2633852	0.20645079644259667	0.9999551774135642	0.68899715
MZT2B	1.2631598	0.20653176440325383	0.9999551774135642	0.11845897
LINC01375	1.2628859	0.20663018687833679	0.9999551774135642	4.465363
SDE2	1.2622411	0.20686202422081956	0.9999551774135642	2.073226
CFAP20	1.2613682	0.20717622869087293	0.9999551774135642	0.6758636
INO80C	1.259802	0.20774081625491014	0.9999551774135642	1.0412083
PMPCB	1.2591144	0.2079890110323418	0.9999551774135642	0.6498251
MSL2	1.2581501	0.20833746378824225	0.9999551774135642	1.7406414
LINC01089	1.256681	0.20886920365174166	0.9999551774135642	1.1932975
CPNE3	1.2560589	0.2090945856401032	0.9999551774135642	0.29318783
RAD51-AS1	1.2555541	0.20927770882870256	0.9999551774135642	1.5560924
SMARCC1	1.2553372	0.20935637363217108	0.9999551774135642	0.84828335
COMMD3	1.2539307	0.20986717987915737	0.9999551774135642	0.4286711
LAMTOR3	1.253132	0.21015769439561638	0.9999551774135642	0.92038625
ZNF66	1.2529778	0.21021375565890577	0.9999551774135642	2.7752893
AL590226.1	1.2510836	0.21090398650227293	0.9999551774135642	2.7487314
STIM2	1.2498283	0.21136227049594936	0.9999551774135642	1.2037631
HDAC1	1.2477001	0.21214091456811923	0.9999551774135642	0.52582693
UFC1	1.2453665	0.2129970890846563	0.9999551774135642	0.18312751
ATP2A3	1.2435577	0.21366239067129844	0.9999551774135642	1.081487
SASH3	1.2431297	0.213820015515938	0.9999551774135642	1.0046796
ATXN10	1.2417575	0.2143260316365625	0.9999551774135642	0.59772164
MRPL45	1.2406992	0.21471691629859724	0.9999551774135642	0.9807785
MGAT1	1.2406107	0.21474960106926744	0.9999551774135642	0.33602154
LRMP	1.2384197	0.21556048524587845	0.9999551774135642	0.87202823
ABALON	1.2380631	0.21569267351921595	0.9999551774135642	1.6012502
GTF2IRD2	1.2375895	0.21586830978265514	0.9999551774135642	1.6320362
FXYD2	1.2375096	0.21589794532488238	0.9999551774135642	6.0725346
CUX1	1.237444	0.21592229099766236	0.9999551774135642	0.44043592
SP140L	1.2367222	0.21619022388293063	0.9999551774135642	1.6583673
C18orf25	1.2361174	0.21641492106345572	0.9999551774135642	1.5892658
BX539320.1	1.2358292	0.2165220292911717	0.9999551774135642	5.993611
ZNF800	1.235524	0.2166355419977123	0.9999551774135642	0.55241436
ZSCAN16	1.2353328	0.21670664184792243	0.9999551774135642	2.7822978
CRBN	1.2343116	0.21708683309019627	0.9999551774135642	0.64996743
NCF4	1.2330734	0.21754837845114372	0.9999551774135642	0.45509583
MOAP1	1.230212	0.21861773612544677	0.9999551774135642	1.2986693
FAM111A	1.2285858	0.21922712701520586	0.9999551774135642	0.7850431
IGKV2-24	1.2285773	0.21923033755890797	0.9999551774135642	4.8921733
AKT2	1.2281351	0.21939626158362058	0.9999551774135642	0.8339914
AC087239.1	1.2274305	0.2196608558110843	0.9999551774135642	1.3365613
GALNT14	1.226723	0.21992675161440822	0.9999551774135642	3.7518656
TPGS2	1.2265176	0.22000399041157492	0.9999551774135642	0.48644996
POLR2J	1.225325	0.2204527890557202	0.9999551774135642	0.24505131
SEPHS1	1.2250026	0.2205742276773197	0.9999551774135642	1.5441529
GOLGA8B	1.2229686	0.2213415795690934	0.9999551774135642	0.87933016
TAF10	1.2220385	0.22169306712517778	0.9999551774135642	0.8751012
ELP6	1.2219101	0.22174161673787018	0.9999551774135642	0.8534279
SCAI	1.221408	0.2219315728193778	0.9999551774135642	1.6671592
CDK2AP1	1.220498	0.22227616525112104	0.9999551774135642	0.382435
ELF2	1.219642	0.2226005827938632	0.9999551774135642	0.37963474
VPS13A	1.2192599	0.22274559875777433	0.9999551774135642	1.557361
H2AC12	1.218227	0.2231376963578312	0.9999551774135642	0.9097958
ALG13	1.2179532	0.22324176084217517	0.9999551774135642	0.62128884
PCIF1	1.2168491	0.22366162291586345	0.9999551774135642	0.9595862
PRKD2	1.21437	0.2246064711215886	0.9999551774135642	1.7043259
SNRPF	1.2134342	0.22496384009612258	0.9999551774135642	0.20561571
FRAT1	1.2123302	0.22538601404135095	0.9999551774135642	1.3139844
DDHD1	1.209988	0.2262835062099755	0.9999551774135642	0.8626659
KMT2E-AS1	1.2098254	0.22634591140530524	0.9999551774135642	0.87053055
AC100810.1	1.2078626	0.22710012180235717	0.9999551774135642	0.6683664
TMBIM4	1.2075745	0.227210992301498	0.9999551774135642	0.21028702
TAZ	1.2067386	0.22753284486015268	0.9999551774135642	0.7904294
MARCHF6	1.2066844	0.22755372705862953	0.9999551774135642	0.7474819
TMEM131L	1.2045248	0.22838682942527344	0.9999551774135642	2.2198966
NOA1	1.2039684	0.22860178448783486	0.9999551774135642	1.0927311
NDUFV2-AS1	1.2038572	0.22864479278187266	0.9999551774135642	2.3067596
NDUFAF3	1.2032381	0.22888420055435332	0.9999551774135642	0.2130628
AC131206.1	1.2020427	0.22934697200597987	0.9999551774135642	0.7384483
PPHLN1	1.201766	0.22945420009748485	0.9999551774135642	0.3586351
RNU5E-1	1.1999003	0.23017809170464087	0.9999551774135642	1.5438144
LMBR1L	1.1991156	0.2304829648510499	0.9999551774135642	1.2143086
AKIRIN2	1.1978462	0.23097691291924627	0.9999551774135642	0.42421156
RIT1	1.1961772	0.23162740409683336	0.9999551774135642	0.6666058
HERPUD2	1.1938264	0.23254585665997873	0.9999551774135642	0.91040415
SDHAF2	1.1935555	0.2326519121219367	0.9999551774135642	0.6433994
DHX40	1.1934955	0.23267536059153304	0.9999551774135642	0.67981136
ANKRD49	1.1923201	0.23313573640987495	0.9999551774135642	0.7832284
GPBP1	1.1909907	0.23365723087933088	0.9999551774135642	0.72221816
ST3GAL6	1.1907996	0.2337322776358065	0.9999551774135642	1.5590413
RNF6	1.1906598	0.23378717339266286	0.9999551774135642	1.044531
TUFM	1.1891307	0.23438826252707423	0.9999551774135642	0.16363062
VTI1A	1.1874132	0.23506467073224446	0.9999551774135642	1.0631305
SNRNP70	1.1855987	0.23578078139575742	0.9999551774135642	0.2780961
AC025159.1	1.1855133	0.23581459828001217	0.9999551774135642	1.2528375
OST4	1.1844947	0.23621728260408303	0.9999551774135642	0.082704306
IRF2BP1	1.1839213	0.23644421790129233	0.9999551774135642	1.4573102
SMCHD1	1.1824777	0.2370161901569282	0.9999551774135642	0.5742449
H4C8	1.1813508	0.23746336935802992	0.9999551774135642	1.8347791
DLG1	1.1807061	0.23771949169226037	0.9999551774135642	0.58998305
MLF2	1.1801955	0.23792248806754335	0.9999551774135642	0.32514995
H1FX-AS1	1.179311	0.2382743355439756	0.9999551774135642	2.3598788
ZSCAN18	1.1789658	0.23841176917665408	0.9999551774135642	1.1186243
CR391992.1	1.1783525	0.23865610745238974	0.9999551774135642	1.5174116
RAD50	1.1774054	0.2390337582476646	0.9999551774135642	0.50045717
IKZF1	1.1764781	0.23940385467666092	0.9999551774135642	0.27165246
WDR33	1.1741617	0.2403302919455267	0.9999551774135642	1.050588
BX119321.1	1.1739163	0.24042855989246303	0.9999551774135642	3.894411
UFD1	1.1738107	0.24047084667160046	0.9999551774135642	0.41997102
ZNF787	1.1718051	0.2412752912365852	0.9999551774135642	0.5720629
CACNA1A	1.1713059	0.24147583833686226	0.9999551774135642	1.8846127
ALG6	1.1707524	0.24169829622889438	0.9999551774135642	1.401513
Z73417.1	1.1696626	0.2421367533882185	0.9999551774135642	1.8861605
UBE2A	1.1685672	0.24257806978997876	0.9999551774135642	0.41480485
RBM23	1.1675972	0.24296929054867256	0.9999551774135642	0.54928297
ANKRD17	1.1674831	0.2430153456636046	0.9999551774135642	0.8047115
PPP2R2A	1.1657171	0.24372883091467756	0.9999551774135642	0.670108
NPIPB13	1.1655945	0.24377844911639812	0.9999551774135642	2.2926672
DCTN2	1.164442	0.24424497595784622	0.9999551774135642	0.3709802
PDS5A	1.1621624	0.2451694818108846	0.9999551774135642	0.76361275
STMP1	1.1618344	0.24530274770130267	0.9999551774135642	0.60202265
ZNF333	1.1618229	0.24530738395093132	0.9999551774135642	1.4163331
MRPL49	1.1615235	0.24542910748886682	0.9999551774135642	1.3332981
ZFR	1.1614064	0.24547664913150413	0.9999551774135642	0.4688175
YAF2	1.1610355	0.2456274336329748	0.9999551774135642	0.61392546
AC006427.2	1.1608901	0.2456866052882819	0.9999551774135642	5.5834885
EIF4A2	1.1607189	0.2457562317971298	0.9999551774135642	0.18028857
FP236383.1	1.160348	0.24590713669553488	0.9999551774135642	3.0815024
PSPC1P1	1.159883	0.2460964400030543	0.9999551774135642	2.0342271
TMEM18	1.158254	0.24676038789540544	0.9999551774135642	0.4697994
NIFK-AS1	1.1579573	0.2468814520807312	0.9999551774135642	1.5234824
SRRD	1.1567249	0.24738477941947512	0.9999551774135642	2.6367164
CBLL1	1.156511	0.24747223578300181	0.9999551774135642	0.8891606
MCM9	1.1560773	0.2476495470639014	0.9999551774135642	1.8479981
RPRD1A	1.1560031	0.24767988552979725	0.9999551774135642	0.9984943
TRAF3IP2	1.1557635	0.2477779198918052	0.9999551774135642	2.279716
SEMA6A	1.1551586	0.24802546070830855	0.9999551774135642	3.6341004
PSMA1	1.1543598	0.24835266655690347	0.9999551774135642	0.20831382
ZNF626	1.1536552	0.24864155944700483	0.9999551774135642	1.6869904
HNRNPA3	1.1533927	0.24874922332660931	0.9999551774135642	0.19081397
CCDC90B	1.1533613	0.24876209836349183	0.9999551774135642	0.5161828
NFU1	1.1533556	0.24876443932935588	0.9999551774135642	0.66739416
Z95327.1	1.1531788	0.24883701691232452	0.9999551774135642	1.0197124
PEF1	1.1476214	0.2511249018847299	0.9999551774135642	0.6882337
CEP95	1.1475358	0.25116025064844383	0.9999551774135642	0.88970566
FBXO21	1.147356	0.2512344943533201	0.9999551774135642	0.9005715
MAP4K2	1.1471392	0.2513240785649513	0.9999551774135642	1.5771017
WDR34	1.1463833	0.25163661889189515	0.9999551774135642	1.110712
H2BC11	1.1455046	0.2520002138279347	0.9999551774135642	2.0546973
AL135925.1	1.1453305	0.25207226795063253	0.9999551774135642	1.4294486
PKMYT1	1.1442493	0.25252027035513414	0.9999551774135642	2.5153112
ECSIT	1.1437614	0.2527225849252639	0.9999551774135642	0.85508764
C1orf43	1.143462	0.25284686912403276	0.9999551774135642	0.38169098
C12orf57	1.1433592	0.2528894906507382	0.9999551774135642	0.19041489
AC068587.4	1.1430054	0.2530363364439092	0.9999551774135642	2.1674912
UBA6	1.1410483	0.25384979851311373	0.9999551774135642	1.132763
SDHC	1.1405406	0.2540611688817669	0.9999551774135642	0.50412714
RFNG	1.1396619	0.2544272001448997	0.9999551774135642	0.7126578
CCNG1	1.1388203	0.25477812587219295	0.9999551774135642	0.54524636
DYNLT3	1.1382953	0.25499717875202055	0.9999551774135642	1.2470028
SPATA1	1.1382211	0.2550281424334191	0.9999551774135642	2.1713352
IL16	1.1364752	0.25575773496855925	0.9999551774135642	0.67770153
PHB	1.1357278	0.25607051981351703	0.9999551774135642	0.8122128
OFD1	1.1351058	0.2563309783700418	0.9999551774135642	0.55826735
EEF1A1P5	1.1336366	0.25694701241798246	0.9999551774135642	0.91483015
MPZL1	1.1333399	0.2570715400240552	0.9999551774135642	0.64628667
AC010978.1	1.1328179	0.2572907624009413	0.9999551774135642	3.3375204
PACSIN2	1.1327522	0.25731832411398914	0.9999551774135642	0.8379278
RALY	1.129674	0.2586136309513246	0.9999551774135642	1.1212041
EIF2AK3	1.1287668	0.2589962410377449	0.9999551774135642	2.4231815
AC025171.1	1.1282504	0.25921419101566334	0.9999551774135642	1.7442036
GSDMD	1.1277169	0.2594394992536565	0.9999551774135642	0.35830578
ARL16	1.1265986	0.25991224320485884	0.9999551774135642	0.6777727
NELFCD	1.1255059	0.26037470895881387	0.9999551774135642	0.64210856
GON4L	1.1235317	0.2612117298566894	0.9999551774135642	0.57147086
SMARCC2	1.1234404	0.2612504809799755	0.9999551774135642	0.7061884
PLEKHM1P1	1.123178	0.2613619125992387	0.9999551774135642	1.3560311
PHF21A	1.122596	0.2616091173002051	0.9999551774135642	0.79370165
NREP	1.1220597	0.26183707644668053	0.9999551774135642	0.41642877
SMARCA2	1.1198173	0.2627916260882248	0.9999551774135642	0.4298439
EPM2A	1.1176462	0.26371810135106666	0.9999551774135642	2.0834432
ZNF726	1.1162627	0.26430973619957965	0.9999551774135642	2.3131971
FDFT1	1.1154553	0.26465538065261096	0.9999551774135642	0.541176
SNRNP200	1.1139946	0.26528150760856095	0.9999551774135642	0.5146565
U91328.2	1.1125054	0.26592091332506684	0.9999551774135642	1.5776812
WDTC1	1.1094072	0.267254568896674	0.9999551774135642	1.4854437
FIP1L1	1.1092931	0.2673037783109099	0.9999551774135642	0.6232231
STAG3L5P	1.1079066	0.2679021704014286	0.9999551774135642	1.3621552
OAS2	1.1078324	0.26793420906746723	0.9999551774135642	1.3586668
DCUN1D1	1.1062063	0.26863725683282313	0.9999551774135642	0.734033
SLC35E2A	1.1061463	0.2686631827666631	0.9999551774135642	2.2765367
TCF7L2	1.1054503	0.2689645433910962	0.9999551774135642	0.51902455
AC006509.1	1.1054046	0.26898431284807833	0.9999551774135642	2.018539
LTN1	1.1041493	0.2695283638564492	0.9999551774135642	1.0028073
ZMAT1	1.103981	0.26960137352131575	0.9999551774135642	1.5133724
TMEM87A	1.1039554	0.26961251178153356	0.9999551774135642	0.6777687
CHD2	1.1037242	0.2697127703310047	0.9999551774135642	0.44419912
ECHS1	1.1035303	0.26979695774904877	0.9999551774135642	0.24824284
MAPKAPK2	1.1030225	0.27001741604266905	0.9999551774135642	0.35286528
ATP8A1	1.1023748	0.2702987414981963	0.9999551774135642	2.2268724
CLEC2B	1.1020753	0.2704289379703222	0.9999551774135642	0.39062673
MYEF2	1.1012651	0.2707813038191098	0.9999551774135642	2.27378
PLCB1	1.0992824	0.27164493439269866	0.9999551774135642	1.1570603
PRPF38A	1.099154	0.27170091786784256	0.9999551774135642	0.8392054
ZNF790-AS1	1.0980128	0.27219889600322067	0.9999551774135642	2.271755
KATNAL1	1.097505	0.27242069700356975	0.9999551774135642	2.028966
C6orf62	1.097408	0.2724630775513631	0.9999551774135642	0.5833506
RNU4ATAC	1.0964608	0.27287714825831655	0.9999551774135642	0.4572093
FOXK2	1.0962812	0.272955770481663	0.9999551774135642	1.0223264
AC008554.1	1.0962554	0.27296700349256986	0.9999551774135642	1.8000907
AC110285.1	1.0962327	0.27297698865659115	0.9999551774135642	5.827681
CUEDC2	1.0937963	0.2740443419083003	0.9999551774135642	0.34966373
PCGF5	1.0935994	0.27413070439134113	0.9999551774135642	0.74217963
DGUOK	1.0935452	0.27415448862980085	0.9999551774135642	0.3661717
ZNF644	1.0926151	0.27456279572222153	0.9999551774135642	0.7621016
CHIC2	1.0914882	0.2750580798610366	0.9999551774135642	0.9632779
CLEC20A	1.0910975	0.2752300043216692	0.9999551774135642	5.5056925
BANK1	1.0896739	0.2758568309584355	0.9999551774135642	1.8625013
OARD1	1.0896311	0.27587568850692323	0.9999551774135642	0.6796941
TAP1	1.0887581	0.276260574443691	0.9999551774135642	0.7665805
RANGRF	1.0884186	0.27641035114582213	0.9999551774135642	0.879051
ARHGAP17	1.0883445	0.276443082835479	0.9999551774135642	0.8917199
AC064807.1	1.0883187	0.276454413651404	0.9999551774135642	1.9559239
ORC4	1.0869694	0.27705035660625865	0.9999551774135642	1.6203864
C1orf131	1.0869665	0.2770516174545068	0.9999551774135642	0.76705205
RABEP2	1.0857397	0.27759414453343145	0.9999551774135642	1.1629584
CRCP	1.0855001	0.27770021098619224	0.9999551774135642	0.8216163
TBC1D24	1.0848325	0.2779958273280384	0.9999551774135642	2.2448041
H4C5	1.084707	0.2780514372272941	0.9999551774135642	2.8528788
ZNF394	1.0845729	0.2781108470749546	0.9999551774135642	0.67915434
EXOC7	1.0843818	0.2781955526465626	0.9999551774135642	0.607235
APPL1	1.0838996	0.2784092909738971	0.9999551774135642	0.30927706
INTS6-AS1	1.0835574	0.27856112566421964	0.9999551774135642	2.0586364
CDK19	1.0835202	0.27857757780424874	0.9999551774135642	0.9765179
AC021078.1	1.08275	0.2789194255637326	0.9999551774135642	1.0694169
TLE5	1.0807045	0.2798286057897298	0.9999551774135642	1.384573
MBNL3	1.0788643	0.2806482066864622	0.9999551774135642	1.5156442
HLX	1.0787331	0.2807067210578431	0.9999551774135642	1.7265989
PSMD4	1.077495	0.2812591992402207	0.9999551774135642	0.21546566
DDX24	1.0764109	0.28174354149928194	0.9999551774135642	0.1592099
STRADA	1.0757604	0.28203441829948883	0.9999551774135642	2.1682081
PLA2G15	1.0753725	0.28220802070496076	0.9999551774135642	1.9522588
SLC35B1	1.075264	0.28225654020870283	0.9999551774135642	0.54093504
AP2A2	1.0746934	0.282511999244913	0.9999551774135642	0.8596658
FAM53B	1.0744709	0.2826116707401072	0.9999551774135642	2.7783828
LINC01003	1.0735523	0.28302338741078004	0.9999551774135642	1.4337338
FNIP1	1.0730987	0.28322683831793727	0.9999551774135642	0.6308611
MRPS31	1.0723256	0.2835738288550207	0.9999551774135642	0.82772565
CMPK1	1.0722857	0.2835917623828741	0.9999551774135642	0.48567888
PIH1D1	1.0716836	0.28386213928899096	0.9999551774135642	0.40894637
TRANK1	1.0702971	0.28448556694790683	0.9999551774135642	1.9370856
GNG2	1.0700489	0.2845972658921997	0.9999551774135642	0.65185857
QRSL1P3	1.0687652	0.2851754926943654	0.9999551774135642	4.552672
CNPPD1	1.0676754	0.2856669660204909	0.9999551774135642	0.8282083
QRSL1	1.067159	0.28590003667180586	0.9999551774135642	2.3583822
C9orf85	1.066403	0.28624150444511576	0.9999551774135642	1.1548669
CEACAM21	1.0653759	0.28670582639820974	0.9999551774135642	2.1141112
AKR1C6P	1.0653303	0.2867264747272056	0.9999551774135642	4.4501715
RARS2	1.0652932	0.28674325223386965	0.9999551774135642	0.9821389
ZNF736	1.0629396	0.28780933460034575	0.9999551774135642	1.7400416
AC138150.1	1.062466	0.2880241659874285	0.9999551774135642	1.2287958
HS1BP3	1.0619154	0.2882740757602309	0.9999551774135642	1.3481419
RC3H2	1.0610025	0.2886887560162845	0.9999551774135642	1.0907204
NDUFV1	1.060546	0.2888962468381804	0.9999551774135642	0.2768128
NPM1P27	1.0598043	0.28923363370942134	0.9999551774135642	0.20765804
CASTOR3	1.0596446	0.2893063363780256	0.9999551774135642	3.2265606
BEND5	1.0585206	0.2898181995476511	0.9999551774135642	1.4076833
RAPGEF6	1.0583465	0.28989750187324737	0.9999551774135642	1.5634165
RNF122	1.0560985	0.29092324515411616	0.9999551774135642	2.706066
TPRKB	1.0558103	0.29105489359516135	0.9999551774135642	0.41680107
PPP4R3A	1.054809	0.29151271601191653	0.9999551774135642	0.45565712
SCOC	1.0541499	0.2918142819266284	0.9999551774135642	0.6240017
DCAF16	1.0540159	0.291875665150947	0.9999551774135642	1.0596708
RIMS3	1.0534396	0.2921395811861224	0.9999551774135642	4.202682
PPM1B	1.053237	0.29223238181771793	0.9999551774135642	1.0263304
NCAPD3	1.05316	0.2922676773951767	0.9999551774135642	1.0618612
THEMIS2	1.0505525	0.29346418730418145	0.9999551774135642	0.31296247
COPS5	1.0502757	0.29359136183934365	0.9999551774135642	0.36097136
COQ5	1.0501901	0.2936307016544164	0.9999551774135642	0.89239043
AIMP1	1.0495197	0.293938985880311	0.9999551774135642	0.3345143
CXorf56	1.0490576	0.29415163157083357	0.9999551774135642	1.6900433
G3BP1	1.0483501	0.294477363018383	0.9999551774135642	0.48248097
SH2D4B	1.0469749	0.29511112921133476	0.9999551774135642	24.112434
TRIM22	1.0469607	0.2951177083342367	0.9999551774135642	0.3015529
STK33	1.0436085	0.29666652709470787	0.9999551774135642	2.5551536
ELP2	1.0426043	0.29713157013944325	0.9999551774135642	0.63868684
LLPH	1.0423476	0.29725055139037215	0.9999551774135642	0.9452772
PPWD1	1.0420367	0.2973946935475267	0.9999551774135642	0.6906472
RPUSD4	1.0420281	0.2973986614234112	0.9999551774135642	1.2570597
NUDCD3	1.0405988	0.2980617931230084	0.9999551774135642	1.1634858
EXOC4	1.0382053	0.2991745176255457	0.9999551774135642	0.7851715
ZC3H7A	1.0364935	0.2999719660367389	0.9999551774135642	0.44167
AC009061.2	1.0364707	0.29998260824824075	0.9999551774135642	2.0038764
FAM104B	1.0354636	0.3004524464694839	0.9999551774135642	0.9707415
ACSF3	1.0346563	0.30082946965894275	0.9999551774135642	0.98396605
SIRT2	1.0341884	0.3010481007935776	0.9999551774135642	0.60707456
GSAP	1.0336664	0.3012921860575708	0.9999551774135642	1.3140217
CCDC130	1.0334381	0.3013989313869301	0.9999551774135642	0.6095377
COQ10A	1.0323141	0.3019250195259999	0.9999551774135642	1.5843552
THRAP3	1.0315381	0.30228856366073986	0.9999551774135642	0.60604215
PIAS1	1.0314753	0.30231798069090754	0.9999551774135642	0.64562404
TTTY10	1.0310445	0.30251993988465453	0.9999551774135642	2.1617095
TXNL1	1.0307164	0.30267381005205185	0.9999551774135642	0.22392987
PARD6A	1.0303627	0.30283978054228855	0.9999551774135642	1.9192485
SFR1	1.0283856	0.3037684554643464	0.9999551774135642	1.4252256
ARIH2	1.0283058	0.3038060174078715	0.9999551774135642	0.607649
ZSCAN31	1.0281118	0.3038972521165809	0.9999551774135642	2.189448
TRIAP1	1.0273757	0.30424357284654957	0.9999551774135642	0.6728121
PRRC2B	1.0271646	0.30434295349600204	0.9999551774135642	0.68776876
TDG	1.0269592	0.304439668868818	0.9999551774135642	0.4655228
SNRPD3	1.026945	0.30444638597181073	0.9999551774135642	0.7401182
TRIM13	1.0265741	0.30462106518738874	0.9999551774135642	1.1334441
TMEM230	1.0255384	0.30510917549833116	0.9999551774135642	0.21997604
UBE2W	1.0237612	0.3059481054723894	0.9999551774135642	1.1411707
KRI1	1.023239	0.3061948230454239	0.9999551774135642	0.93139833
PFKFB2	1.0220637	0.306750757147648	0.9999551774135642	2.0102088
AC025423.2	1.0207571	0.3073695458989124	0.9999551774135642	3.5521007
PPP1CB	1.0203234	0.3075750906240605	0.9999551774135642	0.43790424
AP1G1	1.0201923	0.30763731287835216	0.9999551774135642	0.5269229
BECN1	1.020041	0.30770901406565176	0.9999551774135642	0.9175672
THUMPD2	1.0194961	0.30796750065475165	0.9999551774135642	0.8489952
EIF1P3	1.0164549	0.30941279151884726	0.9999551774135642	0.8145773
NUDT16L1	1.0149828	0.31011399537915785	0.9999551774135642	0.51926714
NOB1	1.0143809	0.3104010299904808	0.9999551774135642	0.663746
AC011447.3	1.0141584	0.3105071819561197	0.9999551774135642	1.325748
AP003086.1	1.013254	0.31093884097866575	0.9999551774135642	2.4202294
RB1CC1	1.0130686	0.31102740039434307	0.9999551774135642	0.78582615
HACL1	1.0124837	0.31130681215323885	0.9999551774135642	1.2681534
LMO2	1.0116822	0.31169007961803197	0.9999551774135642	0.28912777
PIN1	1.0116564	0.3117023602277559	0.9999551774135642	0.25548354
TERF1	1.0111115	0.31196305727632656	0.9999551774135642	0.7209901
IFT22	1.0102186	0.31239058349288407	0.9999551774135642	1.041948
ABHD10	1.0093799	0.31279250905157663	0.9999551774135642	1.254298
AC246787.2	1.0092742	0.3128431156364736	0.9999551774135642	4.836567
SNAP23	1.0090232	0.3129634989050094	0.9999551774135642	0.47536522
DNAJB9	1.0077937	0.31355354381526135	0.9999551774135642	0.803028
VPS13C	1.0075027	0.3136932902736258	0.9999551774135642	0.6051622
PPP1R3F	1.0059392	0.3144447864253246	0.9999551774135642	2.3278475
C17orf49	1.0059108	0.3144585108473672	0.9999551774135642	2.0878613
STK32B	1.0052803	0.3147619211094579	0.9999551774135642	3.3239667
PPP2R2D	1.0045357	0.31512049499974926	0.9999551774135642	0.9820438
GET1	1.0044243	0.3151740980474348	0.9999551774135642	0.94356126
AC243919.1	1.004102	0.31532944326724066	0.9999551774135642	1.0018979
RRM2B	1.0036398	0.3155522383074273	0.9999551774135642	1.208788
NDUFA7	1.0033803	0.3156774339479226	0.9999551774135642	1.4791645
INTS8	1.0033175	0.3157077059216362	0.9999551774135642	1.1744175
HERC2P2	1.0027982	0.3159582108221498	0.9999551774135642	1.1508543
AL161909.1	1.0027183	0.31599676161739876	0.9999551774135642	0.31511685
MAPKAPK5	1.0023161	0.31619093933551723	0.9999551774135642	1.1552155
HAUS1	1.002125	0.3162832356252574	0.9999551774135642	0.49689102
TMEM70	1.0008355	0.3169063531805629	0.9999551774135642	1.0262505
CHCHD7	1.0006415	0.31700016616634763	0.9999551774135642	0.5508395
SNHG19	1.000108	0.3172582457865559	0.9999551774135642	0.580789
SRP14-AS1	0.9996715	0.3174695042859881	0.9999551774135642	1.8148081
ZNF274	0.9986159	0.3179807719455622	0.9999551774135642	1.339342
LY86-AS1	0.9972095	0.31866283944021145	0.9999551774135642	4.3792586
GNB4	0.9959856	0.3192571416298974	0.9999551774135642	0.7047766
MYO5C	0.99490154	0.3197841685634324	0.9999551774135642	3.1741412
KATNBL1	0.9944479	0.3200048565005056	0.9999551774135642	0.6580054
ZNF638	0.9942083	0.32012148655158956	0.9999551774135642	0.44383228
EEF1A1P6	0.99363196	0.3204020678257571	0.9999551774135642	0.7750449
TRIP4	0.99167776	0.32135474045084766	0.9999551774135642	1.0195594
ELAVL1	0.990548	0.32190632556578913	0.9999551774135642	0.657871
AC136424.2	0.98980343	0.32227020797251293	0.9999551774135642	3.1269803
HMGB1P5	0.98970926	0.32231623519780506	0.9999551774135642	1.4469479
RBM4	0.9893698	0.32248224777982537	0.9999551774135642	1.3783795
AC090204.1	0.9879034	0.3231999512086795	0.9999551774135642	1.3525716
ZNF720	0.9871531	0.32356758316963663	0.9999551774135642	0.74861276
MLLT10	0.9859806	0.3241426409237391	0.9999551774135642	0.7614847
ZNF439	0.9854072	0.324424115757435	0.9999551774135642	1.4997945
SLAIN1	0.9842032	0.325015590515635	0.9999551774135642	2.5566967
TBXA2R	0.9832076	0.32550527833405973	0.9999551774135642	3.8725526
EIF2B2	0.98212636	0.3260376028788926	0.9999551774135642	1.0025238
FAM153CP	0.9807142	0.32673370698315884	0.9999551774135642	1.5064845
AC004687.1	0.9799496	0.32711099014596934	0.9999551774135642	0.9006815
NDUFA4	0.97900534	0.32757735331318605	0.9999551774135642	0.07535118
AC136944.2	0.9772965	0.3284224122379601	0.9999551774135642	2.501874
ZNF358	0.97711957	0.32850996144301225	0.9999551774135642	0.8541127
TAF1	0.97677153	0.3286822798701572	0.9999551774135642	0.9393885
ZNF789	0.9763664	0.3288829210072596	0.9999551774135642	1.7725391
RUBCN	0.9761781	0.32897620376740366	0.9999551774135642	1.917935
AC010260.1	0.97613245	0.3289988203522022	0.9999551774135642	2.9911053
PSMD6	0.97590137	0.32911333227714235	0.9999551774135642	0.31498727
TAFA2	0.9753251	0.32939901774013614	0.9999551774135642	1.3353881
EID3	0.97494	0.3295900356853244	0.9999551774135642	1.9470335
POLD4	0.9747117	0.329703265356473	0.9999551774135642	1.7701118
PRPF31	0.97447497	0.3298207677666902	0.9999551774135642	0.4017506
SCAF8	0.9719673	0.3310668248947405	0.9999551774135642	1.4767889
TIMM23B	0.9699988	0.3320470888634428	0.9999551774135642	0.9834199
SMCO4	0.9694083	0.33234153340208306	0.9999551774135642	0.5529757
KIF2A	0.9688434	0.33262333377871645	0.9999551774135642	0.23707521
E2F2	0.9679989	0.3330448987942556	0.9999551774135642	2.558701
DYNC1LI2	0.96734846	0.3333698528345953	0.9999551774135642	0.53847253
VAV3	0.96681786	0.33363509840637506	0.9999551774135642	0.8123575
SMIM14	0.96661246	0.333737810654118	0.9999551774135642	0.7588622
MEAF6	0.9661674	0.3339604238247431	0.9999551774135642	0.31581414
CCNT1	0.9660904	0.3339989627468215	0.9999551774135642	0.7792718
ZNF608	0.966039	0.33402465695487527	0.9999551774135642	1.7344977
ANAPC15	0.96574235	0.33417313733725307	0.9999551774135642	0.29931334
PPP6R2	0.9657195	0.3341845606675997	0.9999551774135642	1.3899852
PPP3CB	0.9654913	0.334298807818878	0.9999551774135642	0.8746719
GDF11	0.9652459	0.3344216515873375	0.9999551774135642	2.4155042
FBXO11	0.9650405	0.3345245199092143	0.9999551774135642	0.78197986
PIGBOS1	0.96436155	0.33486470198084595	0.9999551774135642	0.4467459
TMEM44-AS1	0.963557	0.3352680632718761	0.9999551774135642	1.1814291
ARL6IP6	0.96348286	0.33530526836055785	0.9999551774135642	0.6744892
LARGE2	0.96346	0.33531671661509843	0.9999551774135642	6.1661177
SETP21	0.96346	0.33531671661509843	0.9999551774135642	6.1661177
AQP5	0.9634201	0.33533675166628985	0.9999551774135642	6.0642943
CETP	0.96310055	0.3354970598297268	0.9999551774135642	3.7066252
AC025437.4	0.96177113	0.3361645859964614	0.9999551774135642	6.0557156
RBSN	0.96078116	0.3366622042357815	0.9999551774135642	1.030609
DCLRE1C	0.95866436	0.3377278643111734	0.9999551774135642	1.067179
RFC1	0.9582164	0.33795362513662763	0.9999551774135642	0.23425643
H2AC7	0.95718086	0.33847597824650333	0.9999551774135642	2.7925353
RASSF3	0.9568185	0.3386588522138715	0.9999551774135642	0.72304946
AC083798.2	0.95611674	0.3390132608904618	0.9999551774135642	1.5168616
CEP68	0.9553436	0.3394039620917916	0.9999551774135642	1.9322277
H2BC21	0.9552495	0.3394515579699833	0.9999551774135642	1.5501941
AL450998.2	0.9542025	0.33998117033497366	0.9999551774135642	1.118732
NIP7	0.9534693	0.34035235845354883	0.9999551774135642	1.2761508
UCKL1	0.95101583	0.34159635410722566	0.9999551774135642	0.87090975
FAR1-IT1	0.94996023	0.34213245565598427	0.9999551774135642	2.3375525
ZNF263	0.94993454	0.3421455026645873	0.9999551774135642	1.2892997
MFSD8	0.94685346	0.34371345376594264	0.9999551774135642	1.2222908
ZNF117	0.9465368	0.3438748639261425	0.9999551774135642	1.5925848
CAPN7	0.9464141	0.3439374051897369	0.9999551774135642	0.6181458
NUBP2	0.9460746	0.34411052235491246	0.9999551774135642	0.4425763
MBNL1-AS1	0.94538426	0.3444627472864342	0.9999551774135642	1.661278
ATP13A2	0.94497913	0.3446695317865406	0.9999551774135642	1.521737
AP3S1	0.9449563	0.34468118397352854	0.9999551774135642	0.33348766
WDR82	0.9430791	0.3456404366640966	0.9999551774135642	0.48629975
AC008696.2	0.9428851	0.345739666070374	0.9999551774135642	4.843948
ATP6V0E2	0.9425513	0.34591044150456984	0.9999551774135642	2.0081377
ZNF107	0.94131035	0.3465458470896977	0.9999551774135642	2.0423305
AC103957.1	0.9394902	0.34747911869707715	0.9999551774135642	1.6007996
H3C11	0.9373049	0.3486017397963721	0.9999551774135642	1.9756498
RHOA	0.93690836	0.3488056997870158	0.9999551774135642	0.07346646
AC016866.1	0.9360268	0.3492593787591741	0.9999551774135642	4.5808325
H2AC21	0.93551046	0.3495252999255728	0.9999551774135642	1.7867848
ACO2	0.9345034	0.35004428930525033	0.9999551774135642	0.49969503
MED6	0.9340926	0.3502561420171262	0.9999551774135642	0.524324
TM7SF2	0.9334022	0.35061235541356983	0.9999551774135642	1.6238117
AC135048.1	0.93159914	0.35154371455547917	0.9999551774135642	2.6035054
AHSA2P	0.9302897	0.3522211103763291	0.9999551774135642	0.7190913
AC025423.4	0.9285837	0.3531048820974986	0.9999551774135642	3.1324415
PTCH2	0.9284496	0.35317440181136883	0.9999551774135642	1.2397344
AL096870.1	0.9270317	0.35391006544002324	0.9999551774135642	0.6458747
HEXD	0.9254227	0.35474607508621636	0.9999551774135642	0.6763359
C11orf54	0.9223416	0.3563504211022587	0.9999551774135642	0.71820045
PLLP	0.9209152	0.35709472021357536	0.9999551774135642	1.5603571
C12orf76	0.92040163	0.3573629074113702	0.9999551774135642	1.5332
HNRNPH2	0.9184931	0.3583607810437742	0.9999551774135642	0.55279344
SLC41A1	0.91701245	0.35913612220761504	0.9999551774135642	1.7459755
CSNK2A1	0.9167129	0.3592931112668095	0.9999551774135642	0.2541482
USP4	0.91607386	0.35962816535858966	0.9999551774135642	0.5349119
B4GALT4	0.9146645	0.3603677727322041	0.9999551774135642	0.94859606
ZNF33B	0.9145076	0.36045017670763957	0.9999551774135642	1.6886879
ATG4B	0.91403687	0.36069745958429056	0.9999551774135642	0.6714669
FRAT2	0.9139827	0.36072594141505343	0.9999551774135642	0.84745187
KLF3P1	0.9139057	0.3607664180229818	0.9999551774135642	2.1274548
HAX1	0.91385144	0.36079490327002495	0.9999551774135642	0.35762787
ZNF326	0.9134093	0.36102733562484557	0.9999551774135642	1.1354175
IRF4	0.91254485	0.3614819745752996	0.9999551774135642	0.92420995
TCF7	0.91124964	0.3621638542652106	0.9999551774135642	0.8660242
ICOSLG	0.91122967	0.3621743741329251	0.9999551774135642	2.482568
FAM32A	0.91110986	0.36223749735932964	0.9999551774135642	0.35639748
DAGLB	0.91049933	0.3625592322378217	0.9999551774135642	1.2038773
ORMDL3	0.91027683	0.3626765445768756	0.9999551774135642	1.0809317
PDCL3	0.9097005	0.3629804639183273	0.9999551774135642	0.6543741
ZSCAN30	0.9091471	0.3632724968770211	0.9999551774135642	1.6570596
SWT1	0.9082085	0.3637680846264828	0.9999551774135642	1.8543941
PPIP5K2	0.9080202	0.36386755434453677	0.9999551774135642	0.29186302
FUNDC1	0.90538985	0.3652588942408649	0.9999551774135642	0.88695276
AC005332.4	0.9053328	0.3652891119170064	0.9999551774135642	2.0828447
RIPOR2	0.90450543	0.36572744362527454	0.9999551774135642	0.24045902
ORAI3	0.9043029	0.3658348093244763	0.9999551774135642	1.5366497
VCPKMT	0.9032274	0.36640523552841964	0.9999551774135642	1.2285484
TAF15	0.90297633	0.36653846522540245	0.9999551774135642	0.25080505
MAGEH1	0.901256	0.3674522039899951	0.9999551774135642	0.93431795
TCTA	0.90121895	0.36747191878142194	0.9999551774135642	1.0066661
RPP25L	0.90040016	0.36790732856393227	0.9999551774135642	0.66284126
AP000345.2	0.9001491	0.36804089832975695	0.9999551774135642	3.7330563
TMEM14B	0.8994502	0.36841292771538137	0.9999551774135642	0.09271278
RETREG2	0.8985373	0.3688991959930793	0.9999551774135642	0.5824615
COA1	0.8979952	0.3691881065940622	0.9999551774135642	0.5135533
PASK	0.89747316	0.3694665061051312	0.9999551774135642	2.3703356
CKMT2	0.89709085	0.3696704442335037	0.9999551774135642	6.4734445
SDAD1	0.8969225	0.3697602600676083	0.9999551774135642	0.5997494
AL137798.3	0.8967542	0.36985008946218156	0.9999551774135642	1.8482413
CYHR1	0.8966201	0.3699216581749427	0.9999551774135642	0.5169249
SERINC2	0.89614654	0.3701745016409358	0.9999551774135642	2.4235432
UBE2J2	0.8960724	0.3702141133515533	0.9999551774135642	0.4026412
TRAPPC11	0.89604384	0.3702293493259414	0.9999551774135642	0.9557227
SMAP1	0.89466876	0.37096418506199624	0.9999551774135642	1.2110817
SCML2	0.8945889	0.3710069004183234	0.9999551774135642	2.8353212
ETV6	0.8939498	0.37134873315624917	0.9999551774135642	0.5582639
ZFY	0.893656	0.3715059807359703	0.9999551774135642	1.1194085
DDX39B	0.89315104	0.3717762987657488	0.9999551774135642	0.76056856
SBF1	0.8927973	0.37196574674763305	0.9999551774135642	1.353919
LIPT1	0.892492	0.37212927012166763	0.9999551774135642	2.370352
ZNF138	0.89181304	0.3724931547797399	0.9999551774135642	1.1548859
MED23	0.8900699	0.373428338413309	0.9999551774135642	0.76965326
SET	0.88959634	0.37368266535591754	0.9999551774135642	0.12182722
AC005332.1	0.88896304	0.3740229568337279	0.9999551774135642	1.8714309
MFNG	0.88826406	0.37439872618717707	0.9999551774135642	0.5385701
PECAM1	0.88801587	0.3745322188024097	0.9999551774135642	0.488188
BTBD6	0.8878675	0.37461202154210027	0.9999551774135642	0.8588158
AC139887.2	0.8845097	0.3764211368560437	0.9999551774135642	1.4352326
DDX49	0.88197064	0.3777926901310391	0.9999551774135642	0.55023193
AC008969.1	0.88187647	0.37784360460881206	0.9999551774135642	2.259768
RPAP2	0.881497	0.3780488482332304	0.9999551774135642	1.2714993
PDCD6	0.88085514	0.37839622121286853	0.9999551774135642	1.3265771
IQCN	0.8806184	0.3785244128516292	0.9999551774135642	2.656075
AC022395.1	0.88049	0.3785939255186982	0.9999551774135642	2.0396328
SENP5	0.8801163	0.37879632934909746	0.9999551774135642	1.3624867
GAPVD1	0.8799679	0.37887669131608215	0.9999551774135642	0.7196106
H2AC17	0.87880677	0.3795060406296855	0.9999551774135642	1.3297017
AP000763.2	0.8779823	0.37995331513905384	0.9999551774135642	0.18787667
LYPLA1	0.8778083	0.38004776396082085	0.9999551774135642	0.2933699
LYRM4	0.877794	0.3800555063073633	0.9999551774135642	0.5628626
HDAC10	0.8774032	0.3802676843202816	0.9999551774135642	1.0689119
DPY30	0.87705797	0.3804551429411551	0.9999551774135642	0.37465623
HERC4	0.87553453	0.3812831176240893	0.9999551774135642	0.58918095
NVL	0.8754718	0.3813172526458678	0.9999551774135642	0.96658677
LINC00863	0.87480134	0.3816819937624203	0.9999551774135642	1.5411949
RITA1	0.8743934	0.381904047335475	0.9999551774135642	1.4150909
ATG12	0.87434775	0.3819288974187137	0.9999551774135642	0.373451
MARCHF8	0.873917	0.3821634689255252	0.9999551774135642	1.2857417
KDM5C	0.87242776	0.3829750521222076	0.9999551774135642	0.7094403
AL034376.1	0.8713722	0.3835509512558688	0.9999551774135642	4.665789
PIKFYVE	0.871124	0.383686442336996	0.9999551774135642	1.0211773
TEX10	0.8710784	0.3837113634265703	0.9999551774135642	1.749196
AFF4	0.87107265	0.3837144786324408	0.9999551774135642	0.40174234
DMXL1	0.87092716	0.38379392161337966	0.9999551774135642	0.53140336
ROMO1	0.87012553	0.38423181739770673	0.9999551774135642	0.14428973
SLU7	0.8696862	0.3844719326084346	0.9999551774135642	0.42732754
CD47	0.8694323	0.38461074233079506	0.9999551774135642	0.23885308
SLC39A10	0.86940086	0.38462790071659403	0.9999551774135642	0.6518337
AC026412.1	0.8693267	0.3846684587621616	0.9999551774135642	1.9059366
GBP7	0.8691584	0.3847605040281785	0.9999551774135642	3.1877189
CEP170	0.8683539	0.38520063519658054	0.9999551774135642	0.5235449
METTL18	0.8676121	0.38560670241734507	0.9999551774135642	1.9013946
RANBP6	0.86663646	0.38614123505820785	0.9999551774135642	1.0379882
USP33	0.8664824	0.38622567628633653	0.9999551774135642	0.44649398
WDPCP	0.8663369	0.38630543668562667	0.9999551774135642	1.5206201
OLA1	0.86564934	0.38668247967731983	0.9999551774135642	0.26477927
SNF8	0.8638264	0.3876832776860494	0.9999551774135642	0.20706837
YTHDF3	0.8636894	0.38775851870070843	0.9999551774135642	0.43854448
H4C11	0.86327004	0.38798899966715716	0.9999551774135642	1.246268
FAM89B	0.8629905	0.38814270001010587	0.9999551774135642	0.286986
POLR2M	0.8623971	0.3884690440401185	0.9999551774135642	0.99028844
KCTD17	0.86140996	0.38901227482492706	0.9999551774135642	1.5148963
SNRPD2P1	0.86108476	0.3891913595936243	0.9999551774135642	4.303097
C2orf69	0.86047137	0.3895292436842609	0.9999551774135642	1.7978675
DNTTIP2	0.8592646	0.3901945316640434	0.9999551774135642	0.2540275
SVBP	0.8591933	0.39023387288896394	0.9999551774135642	1.0384557
RIC1	0.8583831	0.39068095844612416	0.9999551774135642	1.654945
TP53TG1	0.8575101	0.3911630255100742	0.9999551774135642	0.62346345
AC104986.2	0.8572762	0.3912922682159524	0.9999551774135642	2.2390878
IRS3P	0.85707647	0.3914026178644584	0.9999551774135642	3.0116363
TBC1D7	0.85666853	0.39162810513886837	0.9999551774135642	0.7698248
HBS1L	0.85396683	0.3931233558577839	0.9999551774135642	0.53747684
BAP1	0.85291415	0.39370691781466194	0.9999551774135642	0.74171305
SLC12A2	0.85248053	0.39394745350818294	0.9999551774135642	1.5584308
PSMG4	0.8519556	0.3942387472837423	0.9999551774135642	0.44921386
KLF7	0.8510826	0.3947234700206653	0.9999551774135642	0.9113399
UBE3A	0.8510598	0.3947361473435167	0.9999551774135642	0.4208018
ZNF821	0.85097706	0.3947821047030492	0.9999551774135642	1.870867
CYB5R4	0.849873	0.39539570741190677	0.9999551774135642	1.247802
AL603766.1	0.8495021	0.39560195644210017	0.9999551774135642	0.8617652
FBXW11	0.8494736	0.39561782444413185	0.9999551774135642	0.57579535
MYSM1	0.84873754	0.3960273518349191	0.9999551774135642	0.94595796
AC099568.2	0.84858346	0.39611309925941995	0.9999551774135642	2.935935
RAD23BP1	0.84703726	0.39697437017717996	0.9999551774135642	1.8112254
PANK3	0.8470173	0.3969855009868579	0.9999551774135642	1.3442094
CRYZL1	0.84662926	0.39720179408006606	0.9999551774135642	0.7727257
ERICH6-AS1	0.8465893	0.3972240635797354	0.9999551774135642	2.1351218
PARN	0.8464895	0.39727974062330507	0.9999551774135642	0.60762197
PAOX	0.84587044	0.39762504332871396	0.9999551774135642	2.0535898
HMGN3	0.8456621	0.3977412457267616	0.9999551774135642	0.1606529
MRPL40	0.845374	0.39790205265547585	0.9999551774135642	0.26144502
MBTD1	0.84454954	0.3983623997803547	0.9999551774135642	1.2289045
HLA-J	0.84422714	0.3985424843048363	0.9999551774135642	1.8502487
SNHG8	0.8433257	0.3990463436922238	0.9999551774135642	0.06956321
ABCB7	0.8426923	0.3994005500402429	0.9999551774135642	0.6902199
AC068389.3	0.84234995	0.3995920916650425	0.9999551774135642	2.024867
FBXO33	0.842156	0.3997006564415161	0.9999551774135642	1.2595253
AKIRIN1	0.8410804	0.400302874083698	0.9999551774135642	0.47801998
STX17	0.84076375	0.4004802887157489	0.9999551774135642	0.63420844
LAIR2	0.8399935	0.40091203502492845	0.9999551774135642	2.8204603
MYB-AS1	0.8387525	0.4016082140442613	0.9999551774135642	1.7998127
BRD1	0.8381848	0.40192693766479715	0.9999551774135642	1.2914295
ZNF616	0.8372291	0.4024638250808049	0.9999551774135642	1.1312425
HSD17B10	0.83718914	0.4024862715232589	0.9999551774135642	0.26733306
MEIOC	0.83686674	0.4026674738572471	0.9999551774135642	1.1722536
SRSF8	0.8366328	0.4027989964293863	0.9999551774135642	0.88658434
RNF115	0.83600515	0.4031519890486611	0.9999551774135642	0.5946932
B2M	0.83528626	0.40355655369264554	0.9999551774135642	0.18919791
MYCBP2-AS1	0.8343819	0.40406581544562703	0.9999551774135642	1.2099558
RAB5A	0.8342335	0.4041493903567476	0.9999551774135642	0.45730728
GATAD2B	0.83419645	0.40417028570075253	0.9999551774135642	0.9849166
PCBD2	0.83346325	0.40458350328525794	0.9999551774135642	1.3873603
AL513343.1	0.8333206	0.4046639251647034	0.9999551774135642	1.7540829
ANKRD13A	0.8327501	0.4049857082788748	0.9999551774135642	1.1261853
TBC1D23	0.83256745	0.4050887111757977	0.9999551774135642	0.74150926
F8A1	0.832111	0.40534628692390784	0.9999551774135642	0.9658082
DCAF8	0.8320597	0.4053752703192852	0.9999551774135642	0.71639484
ICE2	0.8317373	0.40555724992437514	0.9999551774135642	0.8163195
KHDRBS3	0.83160037	0.4056345657634316	0.9999551774135642	2.7949557
AC004967.1	0.83135784	0.40577150082991154	0.9999551774135642	2.7354128
TMEM183A	0.83083576	0.40606640767537827	0.9999551774135642	0.7122264
AP1G2	0.83047634	0.4062695326663225	0.9999551774135642	1.2452366
LINC01609	0.82979447	0.40665499192140386	0.9999551774135642	1.7320489
GPANK1	0.82970035	0.4067082314701931	0.9999551774135642	0.55361533
AC068896.1	0.82903564	0.4070842532871307	0.9999551774135642	6.755375
IGHV5-78	0.8290071	0.4071003962017352	0.9999551774135642	6.6201863
AC019322.4	0.8284964	0.40738941895134717	0.9999551774135642	1.9398882
PDCD4-AS1	0.8278859	0.40773511504364923	0.9999551774135642	1.70919
CLPX	0.8277775	0.4077965186046949	0.9999551774135642	0.6243252
N4BP2	0.827284	0.4080761360427796	0.9999551774135642	1.185452
AC026471.4	0.8267562	0.4083752752575036	0.9999551774135642	3.4851305
MAP2K7	0.8263368	0.4086130627471847	0.9999551774135642	1.0115603
MARK2	0.8260344	0.40878457969939597	0.9999551774135642	0.4308595
B4GALT3	0.8252527	0.40922813336404174	0.9999551774135642	0.7128669
WASHC3	0.8233042	0.41033502568911817	0.9999551774135642	0.39380556
SEPTIN7P2	0.8223114	0.4108996894643512	0.9999551774135642	1.0070801
DHX29	0.8220832	0.411029562429684	0.9999551774135642	0.43947938
TOR1AIP2	0.82197475	0.41109126062530577	0.9999551774135642	1.3995943
SLC37A3	0.82105327	0.411615917251801	0.9999551774135642	0.9314359
LDC1P	0.8204342	0.41196861855619216	0.9999551774135642	5.6200895
UBE2J1	0.81893647	0.4128226692448924	0.9999551774135642	2.2086556
COG3	0.8187054	0.41295453041758223	0.9999551774135642	0.561259
AC091814.1	0.8176812	0.4135392524570143	0.9999551774135642	2.616169
SAAL1	0.81726754	0.4137755604274804	0.9999551774135642	0.8785111
[truncated: 19,270 more rows]

## Sheet: 2_B
names	scores	pvals	pvals_adj	logfoldchanges
EEF1A1	20.531403	1.128696607004523e-93	2.40062481343792e-89	1.87766
PTMA	19.55869	3.479048785070162e-85	3.699794430482864e-81	1.5725414
ACTG1	19.210146	3.0441312854656045e-82	2.1581876103522647e-78	1.907884
DNTT	18.546537	8.697882672611955e-77	4.624881664094592e-73	4.5911393
MALAT1	18.507566	1.7942350298220645e-76	7.632316969857098e-73	1.7440794
HMGB1	18.304396	7.633374179183806e-75	2.705903923617673e-71	2.1068316
IGLL1	16.600534	6.9072384090498e-62	2.0987150531725743e-58	3.2295454
VPREB1	15.795677	3.3319433398300784e-56	7.086710289484593e-53	4.1879787
CD79A	15.551011	1.566128768465325e-54	2.7758327313740837e-51	4.8444595
HNRNPA1	15.094395	1.7629789047090637e-51	2.499786554950472e-48	1.7775496
GAPDH	14.849654	6.992848236088686e-50	9.29568057083564e-47	1.7774216
RACK1	14.667639	1.0389763218449987e-48	1.2998816111365457e-45	1.3308947
TSC22D3	14.41364	4.247220126319596e-47	4.75442762456271e-44	1.9974016
NACA	13.773454	3.681815745108485e-43	3.915426954135618e-40	1.201691
BTF3	13.748732	5.18302456152592e-43	5.249416638052133e-40	1.3599502
SNHG7	13.1404085	1.9318041551122213e-39	1.867615571594629e-36	2.7363706
NPM1	13.108505	2.943406919246078e-39	2.7218835550193407e-36	1.7135127
AC004086.1	12.678746	7.756296314377868e-37	6.109950604092699e-34	1.1702974
IGHM	12.470142	1.0863229304454683e-35	8.251786574158808e-33	3.382352
EEF1B2	12.368311	3.878944156115153e-35	2.844871146772869e-32	1.4498014
SNHG6	12.2744465	1.2423920382685317e-34	8.808145420644468e-32	1.592757
H1-10	11.75109	6.971405787633438e-32	4.633588428036738e-29	1.7124579
CYGB	11.617369	3.36337581502577e-31	2.1039894179347972e-28	3.4102857
BCL11A	11.557559	6.760331070617982e-31	4.108156615456396e-28	2.2553983
LAT2	11.53859	8.429551387907389e-31	4.980225790816729e-28	3.2217968
LTB	11.462078	2.0454695884925807e-30	1.1448708599381236e-27	3.0938604
GNAS	11.430763	2.9351600745903012e-30	1.6007158878579774e-27	1.1958232
CXCR4	11.164902	6.055785773265252e-29	3.141475795404357e-26	2.1997907
JUND	11.073901	1.6792743627536865e-28	8.503925338430513e-26	1.1465132
ZCCHC7	11.024654	2.906327069383842e-28	1.4375504753191846e-25	3.673628
EEF2	10.697147	1.049595038921033e-26	4.960852640624767e-24	1.2382618
RBM38	10.526121	6.547722530739394e-26	2.9630534150275784e-23	3.357316
H1-3	10.508778	7.870722826076818e-26	3.48755007891308e-23	2.1646266
TPT1	10.190111	2.195120093494475e-24	9.337601853706798e-22	0.620506
GAS5	10.124355	4.308073023503828e-24	1.7966353948412333e-21	1.4503585
LDHB	9.930161	3.077562480856778e-23	1.235031630289487e-20	1.433511
CCNI	9.821755	9.07492806915449e-23	3.5093571836881244e-20	1.2629169
GYPC	9.601869	7.850793355063686e-22	2.830144472353382e-19	1.7809283
MSI2	9.557163	1.2102864411724527e-21	4.290263719549483e-19	3.2837842
CIRBP	9.440416	3.712998188085443e-21	1.2737380397159564e-18	1.1784695
PMAIP1	9.317288	1.1935108304079947e-20	3.966372164366819e-18	2.9627302
SF1	9.294024	1.485620054785853e-20	4.861177376190817e-18	1.483235
HLA-DRA	9.253281	2.1770588107523203e-20	7.015736946347136e-18	1.034428
PNRC1	9.064379	1.2531600992930587e-19	3.86282060171943e-17	1.0604922
CD79B	9.01407	1.9854899724708898e-19	6.03276946064048e-17	2.7030504
TCF4	8.796137	1.4160661880666186e-18	4.242015739998438e-16	2.087067
ZFAS1	8.772087	1.7538510727488902e-18	5.109953214561116e-16	1.0874904
ARHGDIB	8.617196	6.861341745585753e-18	1.9720794268495053e-15	1.0301999
AC016739.1	8.295689	1.0795766427510427e-16	2.8001848310575522e-14	1.3496305
MACROH2A1	7.9899	1.350478957250864e-15	3.339922900205654e-13	1.2854083
MZB1	7.847382	4.248119375128144e-15	1.0267414885181876e-12	1.5855076
HNRNPH1	7.8189487	5.3266371925660965e-15	1.2729465893111045e-12	1.2963768
ADA	7.5074153	6.03061955443356e-14	1.3791962075617999e-11	2.9385788
SLC25A3	7.443126	9.833015577781579e-14	2.2014569297245936e-11	1.0342957
STMN1	7.245164	4.319165845129114e-13	9.569201912505326e-11	1.1286559
EEF1D	7.1580453	8.183544007791402e-13	1.776079566344034e-10	0.73060316
CD74	7.1467056	8.888532262290774e-13	1.9095979059258837e-10	0.75211847
PSME1	7.1075997	1.180784935258381e-12	2.486546018614902e-10	0.96696764
PIK3R1	7.0450454	1.8540122071261502e-12	3.755522441272961e-10	1.682361
CXXC5	6.9771504	3.0122738626675027e-12	6.044155923120293e-10	2.1678646
SLC25A5	6.9440484	3.810201962022184e-12	7.434787663325673e-10	1.053735
CD81	6.907327	4.9386965068517656e-12	9.378672857520554e-10	0.9603251
AREG	6.8918676	5.506458649147292e-12	1.0364324691036617e-09	1.9605546
ISG20	6.8824296	5.88403307811787e-12	1.0882391264216434e-09	2.6975071
LAPTM5	6.8632236	6.732378981313757e-12	1.234404901323813e-09	1.4124298
PPIA	6.8609047	6.842589296242718e-12	1.2438891601862082e-09	0.7190048
RBM3	6.7313466	1.6809982470294704e-11	2.979429309672484e-09	0.92489964
MED13L	6.673606	2.495932399361861e-11	4.387271586944414e-09	1.7282288
PABPC1	6.6525817	2.8799576594099803e-11	5.02080487360581e-09	0.6697048
EIF3E	6.5931807	4.305017938609767e-11	7.384147301313801e-09	1.1175299
LINC01578	6.576606	4.8130914596590954e-11	8.189571380439144e-09	1.4081367
H3-3B	6.409207	1.4627854632448828e-10	2.4117817068027452e-08	0.5326832
KMT2E	6.3968525	1.5861250557091137e-10	2.5950226007597803e-08	1.4895012
SOCS2	6.3739443	1.8422780930373924e-10	2.9911002107490304e-08	2.9108891
EIF3F	6.3233666	2.5592529907347103e-10	4.1087234115757446e-08	0.9354968
EIF1	6.321605	2.5885981341442937e-10	4.1087234115757446e-08	0.50044256
SRP14	6.2582603	3.8929533857335944e-10	6.133275967493913e-08	0.61738354
YWHAQ	6.2437406	4.2722807046226773e-10	6.68140722842792e-08	1.5076803
UHRF1	6.206374	5.422102637661757e-10	8.356717463799124e-08	3.89066
GTF3A	6.147944	7.84938595266818e-10	1.1823519501243569e-07	1.0882118
EGFL7	6.1366696	8.426936899281023e-10	1.253374272103553e-07	2.1840892
HNRNPDL	6.1196685	9.37702540087085e-10	1.3849996753550147e-07	1.02448
HLA-DPB1	6.028975	1.6500286046666547e-09	2.387378121949325e-07	0.83112305
SNHG8	6.010718	1.8470383467741523e-09	2.62892967721956e-07	1.0945442
LRRFIP1	6.0101027	1.8540573209033521e-09	2.62892967721956e-07	1.1495548
CBX4	5.99604	2.0218747604012515e-09	2.8478976343691536e-07	2.2322814
HMGN1	5.9807076	2.2217043413964283e-09	3.088459453409192e-07	0.8218997
MME	5.9277716	3.0707331717322002e-09	4.213640247069172e-07	2.5863774
SPINK2	5.9163	3.292648243936653e-09	4.442073561546193e-07	2.209657
EZR	5.910766	3.405205774468719e-09	4.5550516740361747e-07	2.0848262
LSM7	5.8687572	4.3907420745091654e-09	5.800415725635742e-07	0.91401535
CD69	5.777097	7.600032259315513e-09	9.796671886265555e-07	3.0478592
KLF6	5.747843	9.038929804116008e-09	1.158126493998454e-06	1.1539755
HLA-DRB1	5.6954775	1.230270564438835e-08	1.54832e-06	0.6320484
SSBP2	5.622141	1.8860521861169837e-08	2.3596731733248312e-06	2.3686116
NOP53	5.614732	1.9686735046042575e-08	2.4486384075688858e-06	0.92246044
ATP5MG	5.591296	2.2538042888987637e-08	2.7236456488970346e-06	0.6205784
H4C3	5.589219	2.28093088406748e-08	2.7408541792786008e-06	0.7822969
VPREB3	5.5714273	2.526607902659801e-08	3.002146563221861e-06	2.436709
AC245014.3	5.5667763	2.5949526481983977e-08	3.066224881918429e-06	1.6218208
CD53	5.5435867	2.963376476416422e-08	3.474656956568547e-06	1.4108973
MKNK2	5.5430026	2.973283022687835e-08	3.474656956568547e-06	2.1075184
FAM30A	5.5032115	3.729340880460463e-08	4.2875324965683025e-06	2.5081592
PRDX1	5.428329	5.688404649701116e-08	6.453059405927176e-06	1.084202
RBM39	5.4278417	5.7039596046561146e-08	6.453059405927176e-06	0.66333467
NEIL1	5.4247675	5.8030077200446534e-08	6.530379428446017e-06	4.250103
FAU	5.4065537	6.424887242449303e-08	7.192154039981801e-06	0.45647365
HMGN2	5.3656297	8.066719864681293e-08	8.935992958432627e-06	1.0625845
YBX1	5.293756	1.1982939613136908e-07	1.300332360366372e-05	0.61910635
PIM3	5.2734785	1.3386210963769062e-07	1.4452351319208332e-05	2.3243608
AL161909.1	5.2462263	1.552461965317239e-07	1.650965677016618e-05	1.8410656
ARMH1	5.234908	1.6506681474568373e-07	1.7466696929482324e-05	1.8211986
EIF3H	5.218377	1.804977584918425e-07	1.9004984283975237e-05	0.81205815
UBE2D2	5.1710453	2.3278835144997102e-07	2.4390026832460263e-05	1.245691
HSPA8	5.1125007	3.179219935766432e-07	3.28246741814642e-05	0.7601352
SON	5.0562882	4.274951889178781e-07	4.3713438332184365e-05	0.79413885
IER2	5.0453434	4.52707371507251e-07	4.607001475879293e-05	0.80730516
COMMD6	5.0398097	4.6599513250605013e-07	4.719643082510086e-05	0.69767904
PPP1R14B	5.0161986	5.270385597282668e-07	5.287539210783257e-05	0.9410764
CMTM7	4.9904003	6.025428213825068e-07	5.988543583170344e-05	2.0259566
YBX3	4.9821653	6.287663532316279e-07	6.220107705527207e-05	1.1481465
ZFP36L2	4.9411097	7.767921519965554e-07	7.578712055419605e-05	1.3426765
FOXP1	4.9339905	8.056644463799761e-07	7.799114413388878e-05	1.591425
DDIT4	4.9337354	8.06716428109245e-07	7.799114413388878e-05	1.5017318
WASF2	4.9156275	8.849848335524494e-07	8.517078020283731e-05	1.3933095
ODC1	4.909009	9.153779864509593e-07	8.769898375597051e-05	1.3518794
PCBP2	4.872995	1.0991896774573488e-06	0.00010436904129393014	0.9083876
SYF2	4.8402753	1.2965949286836081e-06	0.0001225656779474296	1.2297219
TKT	4.8033257	1.5605168408437435e-06	0.0001462142409158836	0.6878773
SEPTIN6	4.791889	1.6521817535977556e-06	0.00015412391981259064	1.2974663
IL7R	4.785521	1.7054447825320346e-06	0.00015839783877586832	3.7643394
YPEL3	4.770461	1.8380486443565633e-06	0.0001692357429299556	1.2849951
AC103591.3	4.7671056	1.8689149717182664e-06	0.00017124121931478395	1.7564108
RCSD1	4.764356	1.8945765955480948e-06	0.0001722040581654377	2.2487752
MEF2C	4.7591343	1.944252435823573e-06	0.00017596725556396416	1.2354058
IMPDH2	4.758133	1.9539200826859127e-06	0.00017609290779087576	1.4703298
RBMX	4.75537	1.980830951559303e-06	0.00017776495151356462	0.9131109
IKZF1	4.6786957	2.887054526131543e-06	0.00025373868891029664	1.447774
TRA2A	4.672894	2.969850467158603e-06	0.00025887602289342756	1.3515862
SMIM24	4.656284	3.219681956302418e-06	0.00027950781848406586	2.1088285
ITM2C	4.6543427	3.2501621640062738e-06	0.0002810069067733717	0.9459505
ATP5MC2	4.61077	4.011801022092497e-06	0.0003440604674955053	0.47758922
ETS2	4.599672	4.231574350115867e-06	0.00036145122430768825	2.0173223
GMFG	4.5848093	4.544009429344756e-06	0.0003865861462109345	0.585588
RELL1	4.5807643	4.632796452027236e-06	0.00039256951290106483	2.7259479
SNRPF	4.5743036	4.7780611698987326e-06	0.00040327215485149267	1.0567245
FHIT	4.5362477	5.726393073628778e-06	0.0004814017955850216	2.853552
ARGLU1	4.4502797	8.575845320358022e-06	0.0007097262806174894	1.0924436
SRSF10	4.4123774	1.0224166352395686e-05	0.0008268357191981134	1.010596
SMIM3	4.409255	1.0372693069090345e-05	0.0008325162599489908	2.1172683
JUP	4.4047313	1.0591517725862443e-05	0.0008405633974304787	2.639613
ITGA4	4.381041	1.1811364838107258e-05	0.0009304293286729751	1.6017171
PNISR	4.3719716	1.231295247847655e-05	0.0009628095083261681	0.8927663
PEBP1	4.3529415	1.3432308126012895e-05	0.0010426706625261616	0.72211295
TMA7	4.351035	1.3549625217339383e-05	0.0010479526499912412	0.5147903
HNRNPA1P48	4.3216443	1.5487062698429367e-05	0.0011848717141471016	2.221893
EEF1A1P19	4.3054204	1.666687569862092e-05	0.0012641530729848294	2.311074
DDAH2	4.266789	1.983064401156546e-05	0.0014903815105370521	1.3872786
H1-4	4.257711	2.0653070491455704e-05	0.0015417832070276016	1.1390857
PGK1	4.257641	2.0659561521597933e-05	0.0015417832070276016	0.8124897
NREP	4.233551	2.3003004237440192e-05	0.00170470695862758	1.8521771
BAALC	4.2049637	2.611239187716607e-05	0.0019284182737341845	4.187489
MED30	4.1408153	3.4607371552035974e-05	0.002520767758699497	2.046815
SNHG5	4.1347675	3.553141848063261e-05	0.0025792414323023037	0.73870665
NPM1P27	4.108482	3.9826867895763206e-05	0.002871449672118602	1.204918
EIF3L	4.0914454	4.286928486315217e-05	0.0030699892921023015	0.7074704
COX7A2L	4.0768204	4.565575573772031e-05	0.003236840895951911	0.93088967
EIF4B	4.072525	4.650621592217523e-05	0.0032786999372941637	1.0563563
LAIR1	4.0722833	4.655448686176301e-05	0.0032786999372941637	2.1297946
SEPTIN9	4.0680847	4.740115145126061e-05	0.0033273105287685216	1.3440284
KAT6B	4.0655856	4.791198540110079e-05	0.003341114811462336	1.5824542
ATP5F1C	4.0566216	4.978761504569783e-05	0.003460564654924664	0.7177406
NR3C1	4.0535736	5.0441089504687665e-05	0.003494565253013687	1.4352043
SOX4	4.0440083	5.254510174252276e-05	0.00362851223688869	1.9306396
CDKN2D	4.036081	5.435153764324197e-05	0.003729041464948753	1.3235053
S1PR4	4.006835	6.153788700149803e-05	0.004168464889277282	1.9335437
DDX6	4.006826	6.154017467831429e-05	0.004168464889277282	1.3500619
STT3B	3.9806938	6.871437758713125e-05	0.004624956002850299	1.5388296
PNN	3.9782476	6.942504849811752e-05	0.004658048443238048	0.99341273
EIF3M	3.9740007	7.067537809851228e-05	0.004712208830022752	0.9408382
NGLY1	3.9683437	7.237386928063919e-05	0.004810374455405984	1.5955402
SMARCB1	3.9339418	8.356403897118635e-05	0.005502549674545395	1.4440438
EIF4H	3.9127638	9.124575913874503e-05	0.005989833491117185	1.1520934
TRABD	3.8971682	9.732407994213297e-05	0.006349649865917872	1.4112405
SRSF3	3.8879318	0.00010110201291421097	0.006573722855692289	0.60478306
VDAC2	3.887273	0.00010137670302633273	0.006573722855692289	1.1594595
EBLN3P	3.8824506	0.0001034089915970237	0.00668512414065987	1.8688781
DNAJB6	3.8790338	0.00010487220116344949	0.006759172262258809	1.1144071
HLA-DPA1	3.8768158	0.0001058324047390057	0.006800451409045052	0.43233296
TUBA1A	3.8395064	0.0001232819544628047	0.007874125794202384	0.82467645
MYCBP2	3.8386323	0.000123721531502898	0.007878542675254903	1.237847
HNRNPK	3.8267345	0.00012985440542430873	0.008244398056625737	0.5596786
ACP1	3.8188336	0.00013408423583629662	0.008462426148374459	1.2200662
LDHA	3.8093646	0.00013932445948241324	0.00876713588382085	0.706471
OCIAD2	3.7744837	0.00016033939724092417	0.009942445014335907	2.1083472
GLRX	3.763943	0.00016725499601775203	0.010341123576458047	0.9625929
APEX1	3.741531	0.00018290262226916925	0.011275814124762206	0.8139402
ZC3H15	3.7273319	0.00019351758535318168	0.011861456838261734	0.8583567
STK17B	3.719703	0.00019945713874914666	0.0121903847242977	0.9790847
FNBP1	3.7154253	0.00020286218475146225	0.012362967929738827	1.4723246
FXR1	3.7070322	0.0002097021926097773	0.012706996964721804	0.89911586
UBC	3.6836102	0.00022995388004079647	0.013894571234624148	0.34023094
LIMD2	3.6807597	0.0002325400374078412	0.014011031319057718	0.8181237
MYL6B	3.6779664	0.00023510085168293554	0.014125310775266544	1.5194786
AFF1	3.6572628	0.00025492289923770284	0.01523021107833343	1.8678916
HSP90AB2P	3.6349561	0.0002780278332244732	0.016564072786698376	0.63244134
UBE2L6	3.6227422	0.0002914962463034871	0.017317971124661637	1.1730847
RGL4	3.6122456	0.0003035569460048632	0.017984269316371686	3.1827393
ANKRD11	3.5709877	0.0003556376470403209	0.020943946282814888	0.87206405
BTG1	3.570377	0.0003564675609750806	0.020943946282814888	1.049779
HNRNPC	3.5600166	0.0003708313458881673	0.021608799714234055	0.5516473
CSNK1G2	3.5413113	0.00039814346825933745	0.023011177789151762	1.594961
HLA-DQB1	3.5368712	0.00040489723547385524	0.023338101087516064	1.118801
KLF15	3.513506	0.00044223444714671886	0.02514942368011648	1.3573968
RBM8A	3.5088506	0.0004500477449094419	0.025457620974677977	0.7314945
GRK2	3.483364	0.0004951544041617353	0.02762626035021843	1.0615726
PAIP2	3.4828107	0.0004961790142359039	0.02762626035021843	0.9882514
CD24	3.4455407	0.0005699180170601002	0.03148463975286044	2.3686223
CCND3	3.4440606	0.000573047090810833	0.03157548853485908	1.005417
SNHG25	3.4386542	0.0005846134859813783	0.032129571662371924	1.070975
FAM133B	3.4120522	0.000644757572010399	0.035072503322478715	1.0281936
SARAF	3.3868864	0.0007069064379543067	0.03835508425727079	0.57841694
NAP1L1	3.372907	0.0007437909843925408	0.04004984923302519	0.40235132
WTAP	3.3653483	0.0007644707150419736	0.04105941322784782	1.6496327
SRSF9	3.3593798	0.0007811764622262423	0.04185098784657417	0.64524734
UBE2D3	3.3556817	0.0007916962568470823	0.04222945798391976	0.6471874
EEF1A1P5	3.3555017	0.0007922118452011841	0.04222945798391976	2.4661212
YTHDC1	3.3521419	0.0008018893068828766	0.04263845917022976	1.0101868
RNPS1	3.3396115	0.0008389562901740403	0.04449815794441811	0.9684156
EEF1A1P6	3.3352242	0.0008523069133898746	0.04509382025096827	2.3160243
TMEM123	3.334271	0.0008552328253905868	0.045114287320845096	1.3295021
SCAI	3.3337176	0.0008569360138051352	0.045114287320845096	3.3728127
RNASEH2B	3.320924	0.00089719989190733	0.04711739382957285	1.0019218
MATR3-1	3.3182669	0.0009057792046490702	0.047450783013992796	0.97933143
BTG2	3.3131633	0.0009224707881058209	0.047947003437916975	1.7557406
UBE2B	3.3127549	0.0009238189330120544	0.047947003437916975	0.9010765
MDM4	3.305091	0.0009494557046485626	0.04878765132154065	1.40502
TRBC2	3.2934084	0.0009898057440677235	0.050728140651991355	2.2188168
SF3B1	3.27274	0.001065104120783975	0.05406610869917509	0.94366276
C1QBP	3.2480574	0.0011619587170181521	0.05801338016962225	0.78448594
AC092881.1	3.2385356	0.0012014503783452613	0.059704785273423745	1.2579553
ATP5F1B	3.2311351	0.0012329962148900464	0.06098743370813116	0.56979847
COX7C	3.2156887	0.0013013190349175797	0.06421752796673318	0.3932026
SERBP1	3.196777	0.001389723054758133	0.0678752087146694	0.5880076
AC002454.1	3.19643	0.0013913955051763534	0.0678752087146694	2.803239
MAP1LC3B	3.1886563	0.0014293569491890927	0.0694086597084539	0.9084494
GABPB1-AS1	3.1792796	0.0014764162514480314	0.0715305176584241	1.4049039
SET	3.1773295	0.001486380417050142	0.07184960247781698	0.7200947
CCNB1IP1	3.1590502	0.001582841752751921	0.07582311089928066	1.7664626
SIAH2	3.1550667	0.0016046136091433718	0.07669331877049523	2.4388344
USP22	3.1370335	0.0017066662190565775	0.08084428466172461	1.5663792
EIF3I	3.121697	0.0017981198388988364	0.08479869368855733	0.8855941
HNRNPM	3.1191628	0.0018136577461885053	0.08534222699929939	0.62107486
NONO	3.1158907	0.0018339021983219323	0.08573479654422363	0.8286723
MLXIP	3.0990565	0.0019413804342704797	0.09015550318012847	2.0521262
SRSF6	3.0955956	0.0019641805883861487	0.09101559244964053	1.316814
YBX1P1	3.0887003	0.002010341695918507	0.09275045017460026	1.2592721
TBCC	3.0757527	0.002099718443839439	0.09645553257455947	1.823675
GIHCG	3.0712554	0.002131606903949896	0.09756236713643222	0.77862704
CNBP	3.062287	0.002196526477959877	0.10025305077194983	0.48814198
SNRNP70	3.0568807	0.0022365330852706063	0.10181715890223454	0.90951544
NUCB2	3.0563667	0.0022403700393175876	0.10181715890223454	0.46910244
FNBP4	3.049353	0.0022933493632895006	0.10378137788894551	1.2634041
HSP90AB1	3.0379953	0.002381576542988696	0.10731727011192072	0.6410036
ILF3	3.0372005	0.0023878666368835036	0.1073732251582986	0.8670612
SATB1-AS1	3.0250304	0.002486082038062387	0.11148551678809039	3.3409028
BRD7	3.0245779	0.002489803021972962	0.11148551678809039	1.0989145
NDUFA5	3.011727	0.002597659785176871	0.11582730811515067	0.9291754
TAF1D	2.976798	0.002912757941246252	0.12799886085199697	0.7207804
EIF1B	2.9734426	0.002944794574555253	0.12887414774941497	0.87066627
SLC3A2	2.9608817	0.003067597603585156	0.13369822424314073	1.0629988
RNU2-63P	2.9547725	0.003128996925428222	0.13581762368761807	1.1061085
SNRPE	2.9426332	0.003254337710376276	0.1407957567906396	0.6374368
AC022400.8	2.9423873	0.0032569238018240014	0.1407957567906396	2.0804157
N4BP2L2	2.9334583	0.0033520854477898992	0.1434495145256229	0.5461692
COX4I1	2.9328392	0.003358778420882985	0.1434495145256229	0.29013065
SF3A2	2.9201465	0.003498669142979447	0.14912463727861694	1.6376153
SPRY1	2.914762	0.0035595994537872475	0.1511160095461097	0.85062164
GNA15	2.9097946	0.0036166627888908867	0.15323267102972166	1.8779064
SNRPD2	2.9018056	0.0037101854403291633	0.15657129787770036	0.44718075
IRF1-AS1	2.896408	0.003774612506213223	0.15897471959336446	1.5783108
EPC1	2.8824153	0.0039463918198311704	0.16522796774801016	1.4807975
RSL1D1	2.8764775	0.004021409538717656	0.16801920902243905	0.7692711
STRAP	2.8758934	0.004028858742839057	0.16801920902243905	1.1586835
ARID4B	2.8733547	0.004061377701122694	0.1690439184445765	1.3561392
TPM4	2.8691208	0.004116143856970309	0.17098879627715138	0.756337
PRDX6	2.8581586	0.004261072779826259	0.1766642435752918	0.5286355
SFXN1	2.8457162	0.004431165366365532	0.18335886415803207	2.410964
HMGA1	2.8446271	0.004446344279800427	0.18362970191665104	0.751143
CCT2	2.8392382	0.004522138688022075	0.18603746180955807	0.70436406
NIBAN3	2.8330674	0.0046103646558132245	0.18893611919940553	2.1887927
ARID5A	2.8310647	0.004639332132694257	0.189757606019758	2.191827
SF3B6	2.8271384	0.004696602390869337	0.1913640541214558	0.65750885
CHD2	2.825746	0.004717062834512043	0.19183022835035687	1.3407558
XBP1	2.8215563	0.004779125511783262	0.19398324524831717	0.8715833
ARRDC2	2.8144546	0.00488600954069122	0.19719266967924395	2.1396399
SH3TC1	2.8120916	0.004922047997467179	0.19827090692827543	2.2295084
MEF2A	2.8113759	0.004933014071042603	0.19833700619471667	1.2756138
SELL	2.7966232	0.005163971490581918	0.20529441052932115	0.8621244
CCT4	2.793518	0.005213810722357109	0.20688906763771148	1.0913646
AP000763.2	2.7865086	0.0053279205621750095	0.2110233564932966	0.93115777
MZT2B	2.7762008	0.00549982440316456	0.21662178746464267	0.37894854
YWHAE	2.7709699	0.005588958999006858	0.21972563576687038	0.49484152
TRA2B	2.7690551	0.005621913827838935	0.22020715507238728	0.46629867
TCP1	2.753042	0.005904431559732232	0.2287456372385152	0.89599586
ATF4	2.7518783	0.0059254561138237525	0.22899084196588565	0.81217945
GNA12	2.7515004	0.005932293663228313	0.22899084196588565	2.3109348
NSA2	2.7420886	0.006104988353407508	0.23438086153181278	0.60346127
ESD	2.7148366	0.006630848475940281	0.25274465275049074	0.7006645
NCL	2.6887968	0.00717100624451648	0.27138813490146085	0.36730322
UBALD2	2.6877778	0.007192923459923169	0.27173408360409573	1.0821708
CSRNP1	2.677312	0.007421552190433392	0.27937874962535897	1.446334
FUBP1	2.6744702	0.00748474123721322	0.2812596490711802	1.1639903
SFPQ	2.670276	0.007578892803593979	0.2837948433796485	1.2260853
SLC38A1	2.6683874	0.007621631268989425	0.28489362998266443	1.8328873
SRSF2	2.657794	0.007865393415336281	0.2924633785852926	0.6745571
CSNK1D	2.652976	0.007978551336749793	0.29512314501101106	1.3225975
ZNF619P1	2.6464717	0.008133631808387436	0.30033717870241733	1.8103542
FXYD5	2.6415746	0.008252161740401808	0.30418583718649234	0.44170845
EIF3D	2.627314	0.008606186795979798	0.3160432036321008	0.7219783
PSMA1	2.6268308	0.00861841450498935	0.3160432036321008	0.57592773
TUT4	2.626216	0.008633999503077756	0.3160697683837535	1.0880527
SHOC2	2.620019	0.008792486038155878	0.3213185318651845	1.0429084
PSIP1	2.618763	0.008824925210977684	0.32195083072432995	1.1612422
NPY	2.6164134	0.008885894085273462	0.3230668056404808	4.8091984
ANKRD36C	2.6066587	0.009143042869819974	0.3312834391792181	1.4386073
RBM25	2.6056485	0.009170048358736778	0.33169686826866074	0.7118087
GALNT2	2.6018057	0.00927343844006584	0.33429959691823785	2.0689461
TLK1	2.5983098	0.009368396114353042	0.336581785398944	1.2486564
IL2RG	2.592038	0.009540923331797619	0.34137426113203323	1.2767516
RSL24D1	2.589886	0.009600773462602344	0.34254377638230926	1.0026016
DPPA4	2.589381	0.009614868329504849	0.34254377638230926	2.868009
STRBP	2.5828676	0.0097982908165819	0.3477444846205989	1.8790419
FOXN3	2.581449	0.009838651699161675	0.3481834991505319	1.0494949
HINT1	2.5664418	0.010274787054791682	0.3630140296816683	0.30642387
BCAS4	2.5606709	0.010447030286855202	0.3684873750764897	2.9724565
ERICH1	2.5591116	0.010494003426435708	0.3695313888689753	0.8753267
NUTF2	2.5489926	0.010803458690200139	0.3797996080692012	1.0728738
RSRC2	2.5391898	0.011110952289090604	0.3893226428940166	0.55768424
BZW1	2.531785	0.011348354888065373	0.3969871054510895	0.7103903
TTC3	2.5278192	0.011477347610233004	0.4001831251181078	0.7269381
RNMT	2.5166855	0.011846451205584809	0.41237671144285315	0.78162843
RWDD1	2.5098166	0.012079390083434956	0.41979828053035634	0.67596495
BCR	2.5019066	0.012352648800972678	0.4278159151534498	2.2873547
ATP5F1A	2.501819	0.012355713816970048	0.4278159151534498	0.495924
AL135790.1	2.5013971	0.012370435272902892	0.4278159151534498	0.68389547
CNOT1	2.5004134	0.0124048457714536	0.4283095206380627	1.2993592
SUMO1	2.4946117	0.012609505008926526	0.4346702788247298	0.8417015
TOP2B	2.4884453	0.01283029473262001	0.4415655965503155	1.1441821
CD9	2.4857488	0.012927921307343517	0.44397962416104897	1.3003836
AL592293.2	2.4848351	0.012961142210609043	0.44397962416104897	1.2394478
EDEM1	2.4841018	0.012987869396152789	0.44411413856394477	2.0129528
TSTD1	2.481853	0.013070115531692768	0.44559838224643794	0.9138305
MAF1	2.4705174	0.013491772455214794	0.45766588253582685	0.87041855
P2RY14	2.4698763	0.013515979640835427	0.4577569601607145	2.722254
PHB2	2.462142	0.013810995255100406	0.4647880665834344	0.5482242
SSH2	2.4570518	0.0140082485892599	0.47068157858604864	1.2603667
COPB1	2.4480307	0.014363939142551255	0.48111278995735846	1.0844944
HLA-DRB5	2.4448555	0.014491023175900427	0.4846062451701669	2.0342321
H3-3A	2.43879	0.014736524088030105	0.4905025521569833	1.3234371
C9orf16	2.4331245	0.014969151746607587	0.4974670132790574	0.59145504
OLA1	2.4271164	0.015219373838573205	0.5032621057012634	0.9134809
ERGIC1	2.4266684	0.015238177444713603	0.5032621057012634	1.1015068
NACA3P	2.4213102	0.01546467383537421	0.5095920356271564	2.0137913
CRIPT	2.4210029	0.015477758945655319	0.5095920356271564	1.5199136
LINC00173	2.41788	0.01561121937735337	0.5131916923291018	3.2259169
PYURF	2.4166021	0.01566613376915977	0.5142021591608937	0.89073426
FUS	2.4138966	0.0157829395826	0.5172378150729112	0.5291966
CORO1A	2.4126887	0.015835331879631626	0.5181564211505924	0.3959394
ST3GAL1	2.4079237	0.01604353848549583	0.5222105282686171	1.8532583
CYFIP2	2.4076073	0.016057439723902184	0.5222105282686171	2.7748437
LINC00426	2.3994472	0.01641984988851984	0.5323685781690983	3.5541222
DGKD	2.384936	0.01708208402212481	0.5513184295395639	1.6446239
MACF1	2.3788886	0.017364928024191578	0.5590443452280843	1.1312546
GIGYF1	2.3786952	0.017374033203054386	0.5590443452280843	1.4641644
TCF25	2.3767145	0.017467602937681636	0.5603596483884626	0.41803014
ERGIC3	2.3687167	0.017849917143053895	0.5700448764498699	0.80271465
CCT8	2.3680096	0.017884068810069296	0.5702792496572171	0.5955204
CLK1	2.3564281	0.01845163809377478	0.5849462602032371	0.91695815
ZCCHC10	2.3534768	0.01859877133867455	0.5886566482176622	1.6104192
DEFA3	2.3485754	0.01884538624754657	0.5946921663190919	0.9828853
ZRANB2	2.3409114	0.019236731117088245	0.6052456126173815	1.1970342
BRD4	2.335417	0.019521642213213827	0.6114960356890206	0.81984204
SNRPD1	2.3306694	0.019770798329754417	0.6183898671699217	0.48373246
CSNK1E	2.329027	0.019857644575179544	0.6192848130051227	1.8607231
MIR181A1HG	2.327999	0.019912150754589124	0.6195751219085622	2.8338714
HDGF	2.327753	0.019925214320628923	0.6195751219085622	0.7472209
ISCA1	2.3221886	0.020222783632793624	0.6269947304459003	1.3254946
UXT	2.3109496	0.02083563823845695	0.6376304887679725	0.41432035
CD38	2.3017793	0.021347624471915464	0.6495602645109728	1.9163109
ATXN10	2.2974927	0.02159067810713017	0.6560173323722166	1.255756
SNW1	2.294414	0.021766731583847596	0.6589485032403852	0.7789421
GRASP	2.2943041	0.021773033244240285	0.6589485032403852	1.5508789
RTRAF	2.2859156	0.022259198429577423	0.6705819991482751	0.46214402
TAF9	2.2774172	0.022761325715580098	0.683772085656318	0.85966676
AL138963.3	2.2693975	0.023244164529026796	0.6963100498139028	0.764194
ANKRD49	2.2626603	0.023656640297667998	0.7066756776560401	1.6934555
ZC3HAV1	2.2594016	0.023858424717791947	0.7107070522727127	1.4224052
YTHDF2	2.2574997	0.02397686606873885	0.7112468122956856	0.8727685
ARRDC3	2.2555234	0.024100497543038016	0.7139184989455092	1.1215281
LUC7L3	2.2504244	0.024422022421570613	0.7224367105485193	0.6304253
HSH2D	2.2486894	0.02453225717460381	0.7246896914536783	1.8360201
RASGRP2	2.2466166	0.02466454589070013	0.7275869993748976	0.8373402
SINHCAF	2.2402132	0.02507709363161311	0.7377105179125578	1.0529356
HSP90AA1	2.2327864	0.02556303997747972	0.7509672614378677	0.20360792
PSMA3-AS1	2.2319124	0.025620759319616392	0.7516247309916153	0.9623265
PPP1R2	2.2254562	0.02605063109107153	0.7621332498982123	0.884714
WIPI2	2.222105	0.026276202959500342	0.7674774732960878	1.1204314
ITPR1	2.2215078	0.02631658649107374	0.7674774732960878	1.6578264
ZNF292	2.221139	0.02634155604429659	0.7674774732960878	1.2302746
CSNK1A1	2.2147663	0.026776117448990777	0.7790714665151639	0.6632655
CDK6	2.2107432	0.027053627307270525	0.7849980889472534	1.5864105
KTN1	2.2088416	0.027185670141399266	0.7877547932389932	0.436181
TMEM243	2.2066805	0.027336379642800564	0.7899693731287027	1.4250661
PPP4R3A	2.201485	0.02770170991952238	0.7972769530153201	1.0587881
RABAC1	2.1973433	0.027995932566038155	0.8046560672257643	0.45362297
SMARCD1	2.1958456	0.028102988145809214	0.8066429890326803	1.2335413
NDUFB4	2.1939044	0.028242277189541372	0.8084589415132644	0.5028574
PBXIP1	2.186438	0.02878356233267404	0.8217417278572404	1.7010115
RHOA	2.181102	0.02917587417064609	0.8307117372630143	0.32933688
ERH	2.169582	0.03003853137213833	0.8541303793502809	0.42535344
AHDC1	2.163543	0.030499438810734362	0.8631289875624858	2.3689022
EBPL	2.1554925	0.031123307339516595	0.8779331880692023	0.88969445
PPP2R2A	2.1409464	0.0322783526644724	0.9057101356473132	1.2859238
CNOT7	2.1376262	0.032547093928961914	0.9108475536514354	0.9900674
BLNK	2.1351316	0.03275026413208373	0.9153289984563584	1.8134465
DBN1	2.1288204	0.033269125690331414	0.9261793642770404	2.2470562
COX6C	2.12698	0.03342173342065888	0.9292115661751551	0.30367193
RNF138	2.1174102	0.03422505710675787	0.9441410370993943	1.6611543
NCOR1	2.105486	0.035249024922047525	0.9686195233424144	0.682876
UTY	2.0977738	0.03592513592447957	0.9846542731672113	1.673433
CDCA7L	2.0897717	0.03663831756245481	0.9990517644049376	1.652618
PDE4B	2.0885727	0.036746209587926175	0.9999789744458218	1.0398467
FRG1HP	2.0874	0.03685199202479691	0.9999789744458218	0.6664444
CNOT6L	2.086737	0.036911931285175385	0.9999789744458218	1.2925805
EAPP	2.0816464	0.0373747650956972	0.9999789744458218	0.70199406
PKN1	2.0785635	0.03765749595793051	0.9999789744458218	0.962545
PET100	2.077101	0.03779224695772563	0.9999789744458218	0.63631576
EIF3K	2.074773	0.03800756141360014	0.9999789744458218	0.23264842
COX6A1	2.073069	0.03816584849867058	0.9999789744458218	0.29964057
PRRC2C	2.0672936	0.03870648657908723	0.9999789744458218	0.36079368
AP001267.1	2.0627613	0.03913531916827527	0.9999789744458218	1.8941289
CASP4	2.061549	0.039250688462972624	0.9999789744458218	0.6726715
DDX24	2.05952	0.03944445292173473	0.9999789744458218	0.4068076
YPEL5	2.0576446	0.039624259738496356	0.9999789744458218	0.54547954
SH3KBP1	2.055137	0.03986579071742291	0.9999789744458218	0.75805503
MEX3C	2.048549	0.040506243690051014	0.9999789744458218	2.298361
FOXO1	2.0476573	0.04059358486003811	0.9999789744458218	2.3475127
AC091180.3	2.047148	0.04064356574162812	0.9999789744458218	0.6726548
RBIS	2.046599	0.04069748283288009	0.9999789744458218	0.4812546
PSMD7	2.0443547	0.040918526829744346	0.9999789744458218	0.75156546
CALHM6	2.0410476	0.04124610671977831	0.9999789744458218	1.7169621
HSPD1	2.0408895	0.04126182339012869	0.9999789744458218	0.30951628
MORF4L1	2.0375428	0.04159568483315447	0.9999789744458218	0.30634978
VEZT	2.0306342	0.042292114836140905	0.9999789744458218	1.2171587
CDK2AP1	2.0284603	0.04251330140402892	0.9999789744458218	0.8174308
SOCS2-AS1	2.0256712	0.04279847762369928	0.9999789744458218	3.131334
HLA-DMA	2.0251005	0.04285705916658867	0.9999789744458218	0.40678477
CELF2	2.0238574	0.0429848211164753	0.9999789744458218	0.97863436
TMEM256	2.0229132	0.04308209914661994	0.9999789744458218	0.62720877
KANSL1	2.0222237	0.04315325221596613	0.9999789744458218	0.9548726
BX890604.2	2.0187364	0.04351461930257137	0.9999789744458218	2.4187267
SNU13	2.0142963	0.043978444515839044	0.9999789744458218	0.42586178
PIK3IP1	2.012737	0.04414229798994034	0.9999789744458218	2.181984
TSPAN14	2.007581	0.04468784275649364	0.9999789744458218	1.4405179
KDM5B	2.0065136	0.044801469765232395	0.9999789744458218	1.0759951
TSPYL1	2.0029957	0.04517774499100904	0.9999789744458218	1.4596417
HMGB1P5	2.0006416	0.04543101974427362	0.9999789744458218	2.6127837
SYPL1	1.9959687	0.0459373356206275	0.9999789744458218	0.80907655
MAP1LC3B2	1.9957578	0.04596028853860406	0.9999789744458218	1.0502983
DCK	1.9941285	0.04613802154166159	0.9999789744458218	1.549115
CDC40	1.993553	0.0462009171274966	0.9999789744458218	0.783304
LDLRAD4	1.9922092	0.046348114867158195	0.9999789744458218	2.45338
SNX2	1.9905797	0.04652710945480781	0.9999789744458218	0.96572286
BBX	1.9898199	0.04661077465008381	0.9999789744458218	0.85119164
PPP1R18	1.9850019	0.047144251273095676	0.9999789744458218	1.1434766
KRR1	1.9846814	0.04717993305734204	0.9999789744458218	0.91073406
SREK1	1.9836185	0.04729838311999889	0.9999789744458218	0.75149286
USF2	1.9816114	0.04752274985762547	0.9999789744458218	0.8050696
UQCRH	1.9801357	0.047688281189404325	0.9999789744458218	0.2416877
ANAPC5	1.9746634	0.04830636370125288	0.9999789744458218	0.80564064
BAHCC1	1.9734424	0.04844518090719618	0.9999789744458218	2.6043272
MED23	1.9697839	0.04886314065209414	0.9999789744458218	1.7840801
SYTL1	1.9667974	0.049206572574589616	0.9999789744458218	1.4383532
ACSS1	1.9652032	0.049390732348339496	0.9999789744458218	1.6069565
GNPTAB	1.9618653	0.04977817413001729	0.9999789744458218	1.4288244
POLR2C	1.9583429	0.05018978777593687	0.9999789744458218	1.2258064
PCM1	1.9581453	0.050212967585202384	0.9999789744458218	0.5203315
GDI2	1.9543594	0.05065872478584732	0.9999789744458218	0.4148131
SF3B2	1.9486148	0.05134144595165847	0.9999789744458218	0.49110898
AC025257.1	1.9449651	0.05177918148615622	0.9999789744458218	1.0703697
CCDC174	1.9433796	0.05197031157941181	0.9999789744458218	1.428225
IDH2	1.9417458	0.05216788264746691	0.9999789744458218	0.6479545
SRP72	1.9386715	0.05254135941214271	0.9999789744458218	0.5616613
QARS1	1.936941	0.05275255483378947	0.9999789744458218	0.97507906
BEX2	1.9362164	0.052841210163243425	0.9999789744458218	1.8222271
MMADHC	1.9359397	0.052875093211309024	0.9999789744458218	1.1060714
PFDN4	1.9320571	0.053352449406254554	0.9999789744458218	0.9225363
CHCHD2	1.9299008	0.05361913859447875	0.9999789744458218	0.22391225
HRK	1.9270415	0.053974448065955354	0.9999789744458218	5.955445
IGBP1	1.9186442	0.05502937809878604	0.9999789744458218	0.91843486
AAK1	1.9176955	0.05514962772263108	0.9999789744458218	1.0853288
PAN3	1.912434	0.05582055074941754	0.9999789744458218	1.8638331
H1-2	1.9099789	0.05613592946350817	0.9999789744458218	0.45372248
C19orf48	1.9096671	0.0561760924988303	0.9999789744458218	1.0919737
FRMD4B	1.9089556	0.05626782168495769	0.9999789744458218	1.9460595
HNRNPL	1.90347	0.05697923761478136	0.9999789744458218	1.2461447
INTS10	1.9032416	0.057009017734497125	0.9999789744458218	1.1294911
SLU7	1.9008569	0.057320765163340955	0.9999789744458218	1.1240757
ASXL1	1.8968338	0.057849872013413545	0.9999789744458218	1.0772389
SMDT1	1.8963419	0.05791484393386922	0.9999789744458218	0.48102364
EIF2A	1.8934038	0.058304199334710954	0.9999789744458218	0.8228892
AC007068.1	1.8902678	0.058722140949103725	0.9999789744458218	1.8874394
TSC22D4	1.886974	0.059163831260659654	0.9999789744458218	1.03675
KLF3	1.8851513	0.059409415957294195	0.9999789744458218	1.4767997
CD52	1.884005	0.05956430085841867	0.9999789744458218	0.07393481
VDAC1	1.881585	0.05989238037328705	0.9999789744458218	0.5451596
UQCRB	1.8815279	0.059900138966682566	0.9999789744458218	0.21961325
SDK2	1.8759018	0.060668756812962014	0.9999789744458218	3.462744
CD22	1.8722609	0.061170510873909276	0.9999789744458218	3.3621302
CHCHD3	1.8714134	0.061287816444819565	0.9999789744458218	0.9048628
TIMM13	1.8689363	0.06163168419526979	0.9999789744458218	0.45781308
SLC25A36	1.8687342	0.06165980045160191	0.9999789744458218	0.8104738
ST13	1.8662132	0.06201153616308242	0.9999789744458218	0.5746541
SCAND1	1.8654227	0.0621221779295026	0.9999789744458218	0.37977424
GOLGA8B	1.859968	0.06289006564223046	0.9999789744458218	1.5796454
SH3BGRL3	1.8577368	0.06320639849776709	0.9999789744458218	0.17078269
BZW2	1.8540475	0.06373235286285808	0.9999789744458218	1.1705697
SASH3	1.8497523	0.06434926336856744	0.9999789744458218	1.6641717
CCT6A	1.8470161	0.06474480827733103	0.9999789744458218	0.5685375
BAZ2A	1.842914	0.06534156479629619	0.9999789744458218	1.2017281
KLF13	1.8427384	0.06536722276982927	0.9999789744458218	0.87751305
HPRT1	1.8381927	0.0660340167997774	0.9999789744458218	1.0109302
MIF	1.8345562	0.06657147878856781	0.9999789744458218	0.99313706
BRF1	1.8316839	0.0669985380497569	0.9999789744458218	2.0886836
CD47	1.8311129	0.06708369564468854	0.9999789744458218	0.6741232
PSMB10	1.8234533	0.06823475689647615	0.9999789744458218	0.9476653
SATB1	1.8202033	0.06872804878738326	0.9999789744458218	1.863675
MZT2A	1.8200364	0.06875345889654276	0.9999789744458218	0.57607687
PHB	1.8134968	0.06975522792778681	0.9999789744458218	1.6008952
YY1	1.8125964	0.06989408151817621	0.9999789744458218	0.44310442
ELF1	1.8110988	0.0701255551181076	0.9999789744458218	0.75426376
FYTTD1	1.8109934	0.07014187018279706	0.9999789744458218	1.1908321
RBM17	1.8101063	0.07027931211473853	0.9999789744458218	0.56010246
PCGF5	1.8084153	0.0705418801883808	0.9999789744458218	1.3397715
HHEX	1.8075897	0.07067038734315567	0.9999789744458218	1.2763425
COMMD7	1.8057407	0.07095885781775525	0.9999789744458218	0.8252984
TMEM263	1.8044714	0.07115743980475464	0.9999789744458218	1.4103147
ADGRG1	1.8003913	0.07179887619951407	0.9999789744458218	2.2559867
PARP1	1.7903293	0.07340097983671656	0.9999789744458218	0.5621755
CLEC2B	1.7884847	0.07369783528853358	0.9999789744458218	0.81179225
EEF1G	1.7877688	0.07381330758211548	0.9999789744458218	0.96363246
PCMTD2	1.7812556	0.0748707022927053	0.9999789744458218	1.2805355
CAMK2B	1.7808384	0.07493885778881808	0.9999789744458218	2.934591
NOL7	1.7792177	0.07520406886380894	0.9999789744458218	0.46864703
AC135983.2	1.7690065	0.07689279004547786	0.9999789744458218	1.0337406
RASAL3	1.7689934	0.07689498884390257	0.9999789744458218	1.7613937
HSPA1B	1.7639909	0.07773351021911129	0.9999789744458218	1.1607574
ANKRD10	1.7630554	0.07789114240160397	0.9999789744458218	0.8197064
RCN2	1.7615621	0.07814330113012403	0.9999789744458218	1.0218155
GSDME	1.7545922	0.07932909337611069	0.9999789744458218	4.467456
SNRPB	1.754109	0.07941182372081601	0.9999789744458218	0.30376884
TBC1D10C	1.7537929	0.07946601246832988	0.9999789744458218	1.3338625
CASC15	1.7514651	0.07986582766230411	0.9999789744458218	3.3963242
SNRPC	1.7510084	0.07994447352203142	0.9999789744458218	0.5708425
ARHGEF18	1.7488256	0.08032117945940914	0.9999789744458218	2.136073
UPF2	1.7430985	0.08131641753211913	0.9999789744458218	0.6602031
NARF	1.7423694	0.08144382701234533	0.9999789744458218	0.9957991
AC243919.1	1.7404369	0.08178232279491662	0.9999789744458218	1.9420469
LRRC28	1.7360187	0.0825605357002461	0.9999789744458218	2.3438618
PRRC2B	1.7352852	0.08269030122162277	0.9999789744458218	1.4014143
TLK2	1.7336997	0.08297137725609043	0.9999789744458218	1.072625
RBM22	1.7308933	0.08347080285722853	0.9999789744458218	0.99360675
ATP5MD	1.730621	0.08351938973005474	0.9999789744458218	0.28155503
ABHD17B	1.730028	0.0836252629612665	0.9999789744458218	2.3156178
NUP160	1.7267911	0.08420517007218946	0.9999789744458218	1.6991621
ATP5F1E	1.7239057	0.08472486926551015	0.9999789744458218	0.18684445
CLEC14A	1.7188989	0.0856327851763482	0.9999789744458218	3.8150773
ANKRD28	1.7183455	0.08573361456878587	0.9999789744458218	1.6017913
FAM76B	1.7137735	0.08657033312173709	0.9999789744458218	1.1502256
BIN1	1.7100492	0.08725678812258687	0.9999789744458218	1.3425918
ERO1B	1.7092541	0.08740387475879477	0.9999789744458218	2.0763688
GLS	1.7055167	0.0880981092930699	0.9999789744458218	0.8914806
EPB41L4A-AS1	1.7043264	0.08832011859715726	0.9999789744458218	0.8449695
GHITM	1.7032856	0.08851464383097307	0.9999789744458218	1.0044439
COG3	1.6998993	0.08914985654806423	0.9999789744458218	1.3975434
CARHSP1	1.6934168	0.09037614701446521	0.9999789744458218	1.0816785
WDR43	1.6929206	0.09047058626486731	0.9999789744458218	1.0430214
SOD2	1.69195	0.09065551551187945	0.9999789744458218	0.5271327
DHX9	1.6914493	0.09075102769058525	0.9999789744458218	0.7944463
CCDC85B	1.6895037	0.09112295328614695	0.9999789744458218	0.47729635
IGFBP7	1.6872989	0.0915458932168427	0.9999789744458218	0.15508676
SYNGR1	1.6863898	0.0917207515382251	0.9999789744458218	0.58246475
PLCB1	1.6847032	0.09204583707630896	0.9999789744458218	1.9137348
HHIP-AS1	1.6812731	0.09270986917275074	0.9999789744458218	2.8007414
ATP5PB	1.6755987	0.09381680899530476	0.9999789744458218	0.4055981
LGALS9	1.6729548	0.09433618892698677	0.9999789744458218	0.7153215
ASCC1	1.6728187	0.09436299668317448	0.9999789744458218	1.2953557
METAP2	1.669964	0.09492650248518951	0.9999789744458218	0.3122952
ZNF428	1.6691514	0.09508737682637391	0.9999789744458218	0.6136169
CTDNEP1	1.6689274	0.09513176435062275	0.9999789744458218	0.86313903
MIS18BP1	1.6668369	0.09554684874338072	0.9999789744458218	0.6134224
RSF1	1.6664108	0.09563161288174565	0.9999789744458218	0.70666844
YME1L1	1.661022	0.09670904149596128	0.9999789744458218	1.0168071
CUTA	1.658826	0.09715086645593682	0.9999789744458218	0.3670713
RHPN1	1.652361	0.09846097399960985	0.9999789744458218	3.369915
CLIC1	1.6513948	0.09865798437127263	0.9999789744458218	0.2006995
DAZAP1	1.6494623	0.09905294924682564	0.9999789744458218	0.8608898
GRAMD1A	1.6491812	0.09911050366835682	0.9999789744458218	1.5045538
NBDY	1.6458874	0.09978696037524024	0.9999789744458218	0.65385145
MRPL21	1.6441042	0.1001546822815675	0.9999789744458218	0.5978738
LPIN1	1.6424617	0.10049437646057692	0.9999789744458218	1.4845197
CWC25	1.6397913	0.10104856583184799	0.9999789744458218	1.0577629
BEX4	1.6396332	0.10108145587250164	0.9999789744458218	0.9337814
RNU4ATAC	1.6358473	0.10187153947556489	0.9999789744458218	0.92076117
ARID1B	1.6352324	0.10200032213059515	0.9999789744458218	0.7773758
SIK3	1.6300457	0.10309185977231675	0.9999789744458218	1.0450069
EVL	1.629479	0.10321164841883518	0.9999789744458218	1.2425523
CBFA2T3	1.6290267	0.10330737305182709	0.9999789744458218	1.1995596
UPF3A	1.624907	0.1041823693357406	0.9999789744458218	1.094041
GABPB1	1.6238003	0.10441844346829099	0.9999789744458218	2.0798717
UFC1	1.6229043	0.10460986209993284	0.9999789744458218	0.3767938
TRIM28	1.6219512	0.10481378470837263	0.9999789744458218	0.6808773
CMPK1	1.6217053	0.10486646109564923	0.9999789744458218	0.9511156
ARHGEF1	1.6215209	0.10490598217657668	0.9999789744458218	0.9783108
UMODL1	1.6207039	0.1050811462518363	0.9999789744458218	6.925916
RHOH	1.6169225	0.1058950128297798	0.9999789744458218	2.2970474
ATP2A3	1.6120738	0.10694588293350074	0.9999789744458218	1.6272539
COA1	1.6119025	0.10698315662832987	0.9999789744458218	1.0722246
CHURC1	1.6113272	0.1071084333735295	0.9999789744458218	0.8351002
TBCD	1.6063511	0.10819678909122936	0.9999789744458218	2.5617177
ZFR	1.6024027	0.1090665779553924	0.9999789744458218	0.924031
IDH3B	1.601599	0.10924430730287797	0.9999789744458218	0.8007203
ZNF431	1.5980898	0.11002297915915167	0.9999789744458218	1.522866
BCL7A	1.5929688	0.11116717594681125	0.9999789744458218	1.8000599
AC011446.2	1.5901843	0.11179325113612891	0.9999789744458218	0.75550383
SAP18	1.5858583	0.11277145296980855	0.9999789744458218	0.27512312
DNAJC2	1.5841191	0.11316661618547498	0.9999789744458218	0.7700515
MAPK1IP1L	1.5810272	0.11387182162508898	0.9999789744458218	1.0935491
MCM7	1.5807812	0.11392806575756306	0.9999789744458218	0.71484953
TAF7	1.5798765	0.1141351520643444	0.9999789744458218	0.8312021
SPPL2B	1.5783042	0.11449574476908904	0.9999789744458218	1.2736679
ILF2	1.5751728	0.1152165788853416	0.9999789744458218	0.47365162
PKIG	1.5743734	0.11540114923926477	0.9999789744458218	1.2869682
TLE4	1.5724366	0.11584934163077927	0.9999789744458218	1.072899
UBXN1	1.57187	0.11598070385194388	0.9999789744458218	0.38436717
AC008763.2	1.5704119	0.11631932173168333	0.9999789744458218	1.1416048
PAFAH1B3	1.5677196	0.11694658153556359	0.9999789744458218	0.9463223
UBE2I	1.5648253	0.11762387076631461	0.9999789744458218	0.42584
CCDC12	1.5639821	0.11782177733319243	0.9999789744458218	0.5330395
TFDP2	1.5618871	0.11831458233690662	0.9999789744458218	0.7825696
EHMT1	1.5610614	0.11850925512354515	0.9999789744458218	0.9980271
NKTR	1.5607584	0.11858076715580053	0.9999789744458218	0.69822186
DENR	1.56006	0.11874568457064333	0.9999789744458218	0.7555015
AP001858.1	1.5522864	0.12059372284791701	0.9999789744458218	1.6477927
AIMP1	1.550389	0.12104816952249892	0.9999789744458218	0.62811
UBB	1.550231	0.12108610047707338	0.9999789744458218	0.1737413
UBASH3B	1.5492779	0.12131493683543422	0.9999789744458218	4.2832766
NMD3	1.5491945	0.12133498929369085	0.9999789744458218	1.3876159
AP001931.1	1.5457687	0.12216043549694725	0.9999789744458218	0.5683973
RF00003-10	1.5442711	0.12252267966205337	0.9999789744458218	1.4581977
REPIN1	1.544012	0.12258544042315107	0.9999789744458218	1.0119395
SRP9	1.5410166	0.1233127368276446	0.9999789744458218	0.39244276
ELK3	1.5394443	0.12369586027553854	0.9999789744458218	1.0434448
APPL1	1.5392292	0.12374837116804288	0.9999789744458218	0.61293244
TMEM161B-AS1	1.5389875	0.12380733268882153	0.9999789744458218	1.5173919
INKA1	1.5380784	0.12402943897717372	0.9999789744458218	2.5962646
FAM160B1	1.5379511	0.1240605801317453	0.9999789744458218	1.6237189
TERF2IP	1.5373757	0.12420132827583381	0.9999789744458218	0.6356978
PSMD8	1.5368531	0.12432929141691335	0.9999789744458218	0.38081223
SMCHD1	1.5356452	0.12462539800632237	0.9999789744458218	1.0544633
FBXW4	1.5338358	0.1250700483982068	0.9999789744458218	1.7926922
GUK1	1.532729	0.12534262801336404	0.9999789744458218	0.2886173
NUDT16L1	1.5298699	0.12604893512995097	0.9999789744458218	1.0047277
FDPS	1.5277091	0.12658478789342145	0.9999789744458218	0.94262743
THUMPD3-AS1	1.527384	0.12666553684178997	0.9999789744458218	0.9515387
SRRM1	1.5266199	0.12685556398580425	0.9999789744458218	0.259247
MAP2K3	1.5261939	0.12696159494670137	0.9999789744458218	0.77704
ATP5F1EP2	1.525513	0.12713116901722213	0.9999789744458218	0.6144076
ARIH2	1.5247093	0.12733160264163704	0.9999789744458218	1.1087041
WAC	1.521007	0.12825808805278827	0.9999789744458218	0.6370077
PPP4C	1.520537	0.1283760585063901	0.9999789744458218	0.5709801
LSM8	1.5200275	0.1285040469739084	0.9999789744458218	0.5591675
CHD8	1.5199925	0.12851287741912978	0.9999789744458218	1.0962523
AC090152.1	1.5193073	0.12868516538132616	0.9999789744458218	3.0101833
PTOV1	1.5163691	0.12942605173251237	0.9999789744458218	0.8952278
ARPP19	1.5150734	0.129753801053611	0.9999789744458218	1.0424141
MRPL9	1.5140634	0.13000978116553527	0.9999789744458218	1.4691776
SNHG1	1.5122582	0.13046818233620716	0.9999789744458218	1.0768129
BTG3	1.5115906	0.13063802998925667	0.9999789744458218	0.8824134
PSMB7	1.5101852	0.13099616462804312	0.9999789744458218	0.5109027
TSPAN33	1.5096055	0.13114411679453383	0.9999789744458218	2.1307998
PPP1CC	1.5070801	0.13179011740185076	0.9999789744458218	0.5794824
PPP1CA	1.5070758	0.13179124302538398	0.9999789744458218	0.5366106
BCL2L2-PABPN1	1.5026618	0.13292626568460375	0.9999789744458218	1.581205
TIA1	1.4999213	0.1336347951704091	0.9999789744458218	1.074478
ATP5PO	1.4995918	0.13372015130407558	0.9999789744458218	0.23985349
NCK1	1.4985774	0.1339833132263158	0.9999789744458218	1.2046891
HSPE1	1.4978395	0.13417495519056064	0.9999789744458218	0.35020468
CHD9	1.4977648	0.1341943593368461	0.9999789744458218	0.4593081
ZMIZ1	1.4970709	0.13437480758200204	0.9999789744458218	1.2298447
DNAJB1	1.4934475	0.13532007045635175	0.9999789744458218	0.68043333
C8orf33	1.4909749	0.13596808416587702	0.9999789744458218	1.0590814
ESYT2	1.4897715	0.13628432407316066	0.9999789744458218	1.1232306
HOPX	1.4854586	0.1374223746343319	0.9999789744458218	1.2860775
GNG7	1.484106	0.13778082484675308	0.9999789744458218	2.0147047
KIF2A	1.4832319	0.13801280393545784	0.9999789744458218	0.588634
HMCES	1.4782603	0.13933813438569814	0.9999789744458218	1.4574771
ZC3H11A	1.4775927	0.13951683758608865	0.9999789744458218	0.8668906
SMARCD2	1.4773247	0.13958860358664654	0.9999789744458218	1.0231086
VAV3	1.476376	0.1398429542671764	0.9999789744458218	1.6192949
NRXN2	1.4718436	0.14106311039113792	0.9999789744458218	1.578177
MRPL3	1.4709476	0.14130526987994105	0.9999789744458218	0.67815775
ATXN7	1.4692085	0.1417762560326252	0.9999789744458218	2.6844237
SMARCE1	1.4680929	0.1420789874508689	0.9999789744458218	0.5937041
EIF3G	1.4630071	0.14346545106481337	0.9999789744458218	0.285057
C1D	1.4617246	0.14381669328623206	0.9999789744458218	0.85062677
CERKL	1.4573678	0.14501488110371588	0.9999789744458218	1.307959
RNU5F-1	1.4553035	0.1455852339302344	0.9999789744458218	1.7045364
COPS3	1.4542714	0.1458710536531051	0.9999789744458218	0.71049887
AGPS	1.4518911	0.14653190093614554	0.9999789744458218	2.7327545
MYB	1.446041	0.14816570482189373	0.9999789744458218	1.086232
HSD17B11	1.4456193	0.14828399193623423	0.9999789744458218	0.574622
PPP1R10	1.4419916	0.14930473619788415	0.9999789744458218	0.51906383
HNRNPR	1.4411703	0.14953656748165622	0.9999789744458218	0.27268466
DBF4	1.4399098	0.14989290683126574	0.9999789744458218	1.3441792
SNHG32	1.4352587	0.15121336766165455	0.9999789744458218	1.9099119
MAZ	1.4338621	0.1516116052155184	0.9999789744458218	2.5022225
IGLC2	1.4330013	0.15185745740772988	0.9999789744458218	-0.37874606
ELAVL1	1.4296811	0.15280858875678355	0.9999789744458218	1.2771404
AC127502.1	1.4280868	0.15326689034465077	0.9999789744458218	1.1488111
C12orf57	1.4270546	0.15356414393218967	0.9999789744458218	0.3221021
GPSM1	1.4250256	0.15414980952567572	0.9999789744458218	2.53942
DHX36	1.424661	0.15425520613700766	0.9999789744458218	0.6796387
PCNP	1.4235016	0.1545908076470671	0.9999789744458218	0.67635214
MLF2	1.4220434	0.1550136389762033	0.9999789744458218	0.5573966
CAMK1D	1.4186924	0.15598871465333705	0.9999789744458218	2.479031
CASP2	1.4186836	0.15599127665395995	0.9999789744458218	1.0352421
TPRKB	1.4170498	0.15646836422109034	0.9999789744458218	0.72502923
PMPCB	1.4156927	0.15686549541033915	0.9999789744458218	0.86986065
PRDM2	1.4098645	0.15857966626516729	0.9999789744458218	0.87710994
TUBA4B	1.4078662	0.15917067202707225	0.9999789744458218	1.6718954
PPP2R1A	1.4066145	0.1595417104184006	0.9999789744458218	0.8778487
PPHLN1	1.4065707	0.1595547411795213	0.9999789744458218	0.5708506
RAB11A	1.4013003	0.16112428395026557	0.9999789744458218	0.6507966
PCBP1-AS1	1.4003122	0.1614198671891427	0.9999789744458218	1.1418533
DMTF1	1.3993195	0.16171717616637293	0.9999789744458218	1.1305884
PCMTD1	1.3934652	0.16347918883098334	0.9999789744458218	0.6967571
WDR74	1.3928282	0.1636717249943649	0.9999789744458218	1.0650443
JPX	1.3907334	0.1643063084812778	0.9999789744458218	0.7438161
NDUFV1	1.389912	0.16455559157250244	0.9999789744458218	0.53331286
SPIN1	1.3898549	0.16457293199614043	0.9999789744458218	0.98698545
DTNBP1	1.386293	0.1656574304618098	0.9999789744458218	1.1144522
DUSP12	1.3844616	0.16621714686631806	0.9999789744458218	1.5366669
SNRNP200	1.3812467	0.1672031082095221	0.9999789744458218	0.92841995
ARFIP2	1.3811721	0.1672260583194095	0.9999789744458218	1.493906
POLR1D	1.3797227	0.16767202948861104	0.9999789744458218	0.38253728
RF00019-380	1.3786994	0.1679874497746443	0.9999789744458218	3.48864
ARPC5L	1.3781592	0.16815413877075525	0.9999789744458218	0.8224596
PSPC1	1.3763629	0.16870930654430438	0.9999789744458218	1.1346257
USP33	1.37364	0.1695535023092709	0.9999789744458218	0.9231524
SNHG29	1.3733633	0.16963946046006728	0.9999789744458218	0.66500294
SMNDC1	1.3662483	0.17186105057224643	0.9999789744458218	0.892237
RNU4-2	1.3656818	0.1720388864925516	0.9999789744458218	1.2747989
MXD4	1.3644124	0.17243779379995017	0.9999789744458218	0.81626475
FMNL1	1.3628445	0.1729315163131412	0.9999789744458218	0.66283286
SMC4	1.3608506	0.17356091321158817	0.9999789744458218	0.6774043
VPS4B	1.357987	0.17446779689163117	0.9999789744458218	0.5725032
WBP11	1.3569593	0.1747941348500579	0.9999789744458218	0.84018576
ARHGEF7	1.3549039	0.1754481773078378	0.9999789744458218	1.4698894
SPSB3	1.353257	0.17597356598990077	0.9999789744458218	0.750908
PPM1G	1.3516934	0.17647341965409202	0.9999789744458218	0.45788625
DIPK1B	1.3498795	0.1770546311862653	0.9999789744458218	1.9035859
MAGED1	1.3492471	0.17725761613930235	0.9999789744458218	1.1061455
DNM1L	1.3491681	0.17728300144111864	0.9999789744458218	0.75712717
EZH2	1.3450264	0.17861669900306543	0.9999789744458218	1.4730998
CDK9	1.344776	0.17869755345615035	0.9999789744458218	2.028696
ANKHD1	1.3429271	0.17929558499737586	0.9999789744458218	0.74812293
AP000347.1	1.3421936	0.17953322068254052	0.9999789744458218	3.0515547
UHRF1BP1	1.3398879	0.18028180390949666	0.9999789744458218	2.167436
ABCG1	1.3393301	0.18046323757102967	0.9999789744458218	3.17594
ZNF814	1.3381047	0.18086229636887818	0.9999789744458218	1.9214891
POLR2J3-1	1.3378236	0.18095392905881358	0.9999789744458218	1.2572632
ADSL	1.334253	0.18212095213842716	0.9999789744458218	0.8317088
ZNF714	1.3333483	0.18241753991485676	0.9999789744458218	1.8768914
JMJD1C	1.332773	0.18260633290962358	0.9999789744458218	0.5698342
MRPL10	1.3326017	0.18266256643092937	0.9999789744458218	1.2946682
IP6K1	1.3291935	0.18378413985145958	0.9999789744458218	1.4298921
ATF7IP2	1.3277091	0.18427425172827294	0.9999789744458218	0.9525688
AGK	1.326229	0.18476387622093982	0.9999789744458218	1.8224373
RBBP6	1.324336	0.18539147462337136	0.9999789744458218	0.69459987
LRMP	1.3243316	0.1853929325992112	0.9999789744458218	1.3051113
REST	1.3213583	0.18638192956157473	0.9999789744458218	1.1426792
MAIP1	1.3195839	0.18697396831469926	0.9999789744458218	1.8498951
PPP4R2	1.319158	0.1871163227902667	0.9999789744458218	0.6490646
GPS2	1.3183674	0.18738069777873556	0.9999789744458218	0.9216461
ETV6	1.3146913	0.18861366487687148	0.9999789744458218	1.0525596
ATAD2B	1.3102115	0.19012428152709882	0.9999789744458218	1.1337508
ARF5	1.3084021	0.19073697231631948	0.9999789744458218	0.29216835
NOP58	1.3083186	0.19076526249442505	0.9999789744458218	0.4815557
ARHGDIA	1.3076643	0.19098722414817304	0.9999789744458218	0.5910683
MAPKAPK5-AS1	1.3072513	0.19112735139746273	0.9999789744458218	1.0975828
SMAP2	1.3052179	0.1918186568682324	0.9999789744458218	0.37757015
VBP1	1.3019152	0.192945384568869	0.9999789744458218	0.675935
DCP1A	1.3018054	0.19298292561251662	0.9999789744458218	1.3487364
CD96	1.301331	0.19314516459095743	0.9999789744458218	2.8135078
PSMC1	1.3008392	0.19331351822917553	0.9999789744458218	0.6195373
CDC42	1.298977	0.1939518334057292	0.9999789744458218	0.18205708
KLHDC2	1.298832	0.19400157841810572	0.9999789744458218	0.9863303
STMN3	1.2985729	0.19409053981071644	0.9999789744458218	2.0027618
DOK3	1.2960607	0.1949545657624303	0.9999789744458218	1.4455322
PDCD10	1.294607	0.19545583964828983	0.9999789744458218	0.5550424
NAE1	1.2923979	0.19621940227599	0.9999789744458218	0.91554046
AKAP8L	1.2923275	0.19624372636384368	0.9999789744458218	0.824937
CYBC1	1.2910846	0.19667432382559435	0.9999789744458218	0.651628
NAA20	1.2904522	0.19689369185651606	0.9999789744458218	0.6492125
MEIOC	1.2889283	0.1974230438004957	0.9999789744458218	1.9512889
RNF145	1.286662	0.19821213183872466	0.9999789744458218	1.628485
RNF125	1.2855772	0.19859066954455795	0.9999789744458218	1.7371218
CNOT9	1.2854366	0.19863974951451024	0.9999789744458218	1.4038287
MDH2	1.2851117	0.19875328090923272	0.9999789744458218	0.6488027
UBA52	1.2835745	0.19929089650558973	0.9999789744458218	0.14737278
ERP29	1.2813522	0.200070012439995	0.9999789744458218	0.2200699
CHD3	1.2780538	0.20123046484670015	0.9999789744458218	0.90418774
STK17A	1.277272	0.20150623050000782	0.9999789744458218	1.1449801
TGFBRAP1	1.2755942	0.2020989723521699	0.9999789744458218	2.0468504
HNRNPUL1	1.2753352	0.20219063467307352	0.9999789744458218	0.5121086
PIK3CA	1.2733763	0.2028845200857643	0.9999789744458218	1.6833318
ATP1A3	1.272801	0.2030886586532632	0.9999789744458218	5.2416396
SEPTIN2	1.2714263	0.20357701517779903	0.9999789744458218	0.33208746
C9orf85	1.270807	0.20379728871943936	0.9999789744458218	1.6699886
PPP1R35	1.2689098	0.20447324916840326	0.9999789744458218	1.1927978
DNAJC19	1.2682817	0.20469736346115408	0.9999789744458218	0.59296334
THOC7	1.2672057	0.20508175062462275	0.9999789744458218	0.8327203
CREBZF	1.266503	0.20533306206418112	0.9999789744458218	1.2446539
BAK1	1.2636043	0.20637208781884908	0.9999789744458218	2.15505
TCEA2	1.2635999	0.20637366499176413	0.9999789744458218	1.0454438
S100Z	1.2623087	0.2068377334701057	0.9999789744458218	2.1807513
HIF1A	1.261136	0.20725983932801928	0.9999789744458218	0.37402666
SNHG17	1.2597613	0.20775546297963476	0.9999789744458218	1.181227
RNU5E-4P	1.2595286	0.2078394715045142	0.9999789744458218	1.6337996
RF00012-39	1.2587819	0.20810909905004016	0.9999789744458218	1.1746441
YWHAZ	1.2585096	0.20820749688951734	0.9999789744458218	0.20785479
NUTM2A-AS1	1.257605	0.20853467385836977	0.9999789744458218	0.81683975
UBN1	1.2567134	0.20885745049145965	0.9999789744458218	0.8273287
AKR1B1	1.2546886	0.2095917997310286	0.9999789744458218	0.95026505
BPTF	1.2543285	0.2097226171271842	0.9999789744458218	0.774527
LSM12	1.2535995	0.20998762354301248	0.9999789744458218	1.1359278
RNVU1-15	1.25114	0.2108834091019317	0.9999789744458218	1.9400705
MAX	1.2500508	0.21128099597497618	0.9999789744458218	0.55868816
ZCRB1	1.2499937	0.21130185216220976	0.9999789744458218	0.45462033
CRCP	1.2498839	0.21134196439835418	0.9999789744458218	1.2617965
PDE7A	1.2470071	0.21239486740738533	0.9999789744458218	1.639674
PAWR	1.2455885	0.21291547796242583	0.9999789744458218	1.6872461
DYM	1.2442974	0.21339014681571633	0.9999789744458218	1.3371626
SNF8	1.2429973	0.2138688157665236	0.9999789744458218	0.44462427
COX7A2	1.2414031	0.21445688890225445	0.9999789744458218	0.19145113
NAP1L4	1.240327	0.2148544562294965	0.9999789744458218	0.5345052
AC138409.2	1.2400635	0.21495190058420133	0.9999789744458218	1.2037752
Z97192.3	1.2374679	0.21591342987563666	0.9999789744458218	3.0533142
PHF14	1.2370068	0.21608458347078763	0.9999789744458218	0.8955432
ARHGAP25	1.2356409	0.21659209721688388	0.9999789744458218	1.4630896
PTGES3P1	1.2344769	0.2170252210594208	0.9999789744458218	1.4306735
AFF3	1.2339851	0.21720846437382602	0.9999789744458218	1.139222
FAM174C	1.2329178	0.21760641952458293	0.9999789744458218	0.53201044
UHRF2	1.2328387	0.21763591852528086	0.9999789744458218	1.2660813
STK32B	1.2324786	0.217770339246543	0.9999789744458218	4.2022133
CCDC18-AS1	1.2296854	0.21881494661511047	0.9999789744458218	0.7712854
EIF4A2	1.2283459	0.21931717312591026	0.9999789744458218	0.24126932
NPIPB4	1.22799	0.2194506902827963	0.9999789744458218	1.8077902
CSGALNACT1	1.2245249	0.2207542994538274	0.9999789744458218	2.3332841
RALY	1.2209718	0.2220967091528021	0.9999789744458218	1.5640461
PLEKHF2	1.220884	0.22212996993402867	0.9999789744458218	2.0344837
FRG1	1.2205809	0.22224474701206165	0.9999789744458218	0.6806982
CCNL2	1.21842	0.2230643886422573	0.9999789744458218	0.7159946
TTC19	1.2167159	0.22371229654094227	0.9999789744458218	0.77168524
HELLS	1.215236	0.22427613248264466	0.9999789744458218	0.8932744
FDFT1	1.2148099	0.2244386116456618	0.9999789744458218	0.81133175
LCN6	1.2133342	0.22500207643432213	0.9999789744458218	2.8157651
NIPBL	1.2123373	0.22538332208071932	0.9999789744458218	0.7730046
ARID4A	1.2123196	0.22539004419908415	0.9999789744458218	1.1594849
ITGAE	1.2119814	0.22551947288297836	0.9999789744458218	0.57739806
GLO1	1.2106199	0.2260410862870028	0.9999789744458218	1.0491631
KLHL28	1.2100095	0.2262752503887776	0.9999789744458218	1.9966185
CDS2	1.2079321	0.22707337869477906	0.9999789744458218	1.6954904
CSNK2A2	1.2070625	0.22740807423032128	0.9999789744458218	1.0122327
NCBP2AS2	1.2069659	0.22744528431875377	0.9999789744458218	0.70080435
ZC3H8	1.2047523	0.22829892243836925	0.9999789744458218	1.1507888
TCF3	1.2038432	0.22865018406965842	0.9999789744458218	0.8446178
GPATCH8	1.2033513	0.22884039902626818	0.9999789744458218	0.9048775
EIF2S3	1.2016823	0.2294866106329847	0.9999789744458218	0.5892135
GTF2B	1.1999651	0.2301528825444782	0.9999789744458218	0.815721
PSMA6	1.1997411	0.23023988888124325	0.9999789744458218	1.2910502
SMYD3	1.198384	0.23076754504106578	0.9999789744458218	1.5382001
KMT2C	1.1962671	0.23159233521571088	0.9999789744458218	0.95917207
BCL7B	1.1955907	0.23185629814888387	0.9999789744458218	0.90552795
CCNG1	1.1906543	0.23378935504492127	0.9999789744458218	0.8142258
SECISBP2	1.1905884	0.2338152290751918	0.9999789744458218	1.0448242
MEAF6	1.1899823	0.2340533653840653	0.9999789744458218	0.5789418
CCT7	1.1873515	0.23508900690870072	0.9999789744458218	0.3289131
GUCY1A1	1.1829684	0.2368216974185552	0.9999789744458218	1.8262384
GUCD1	1.1808294	0.23767047806955488	0.9999789744458218	1.3234079
STAG3	1.1786115	0.23855289740419083	0.9999789744458218	3.385453
KLHL24	1.1763629	0.23944990627566698	0.9999789744458218	1.2361574
RASSF1	1.1761608	0.23953061321224223	0.9999789744458218	0.79774296
CHD6	1.1728537	0.24085447830192352	0.9999789744458218	0.6926047
ZFX	1.172599	0.24095666265614202	0.9999789744458218	1.151677
ANKRD12	1.1706314	0.24174697743995976	0.9999789744458218	0.48874167
STAG3L5P	1.170078	0.241969581784502	0.9999789744458218	1.8252146
ANP32B	1.1657388	0.2437200823872263	0.9999789744458218	0.18119235
UBE2Q2P1	1.1655455	0.24379824628911217	0.9999789744458218	1.5017004
PITPNM2	1.1644124	0.24425692533151055	0.9999789744458218	3.3533218
XRN1	1.1628225	0.24490151925929715	0.9999789744458218	0.6300256
RAPGEF5	1.162515	0.24502630210212228	0.9999789744458218	4.9410157
AGO2	1.1618519	0.24529562841538421	0.9999789744458218	1.2906709
FAM13B	1.1617333	0.24534380797846023	0.9999789744458218	1.4705113
POLR2D	1.1598403	0.24611379539744427	0.9999789744458218	1.8426871
DDX27	1.159779	0.24613883496344702	0.9999789744458218	1.0964416
TRAPPC6A	1.1592606	0.24634995369037882	0.9999789744458218	0.53473276
ASB8	1.1588742	0.2465074807545523	0.9999789744458218	1.454075
ZNRF1	1.1570866	0.24723696152991492	0.9999789744458218	1.1062974
PHGDH	1.1570691	0.24724413836768977	0.9999789744458218	1.0051135
ZNF433-AS1	1.1566782	0.24740386074382226	0.9999789744458218	1.5733534
B4GALT1	1.156037	0.24766603366461726	0.9999789744458218	0.70673937
DCTN2	1.151118	0.24968369200472373	0.9999789744458218	0.5534626
AL391840.1	1.1506305	0.24988428009982577	0.9999789744458218	4.654425
PDCD7	1.1499673	0.250157332890351	0.9999789744458218	0.75185835
LCK	1.149651	0.250287603592369	0.9999789744458218	1.8726308
DHX40	1.1473278	0.25124618415812183	0.9999789744458218	0.93313396
CSDE1	1.1464889	0.2515929165128856	0.9999789744458218	0.27378023
SEPTIN1	1.1441612	0.2525568009887028	0.9999789744458218	0.8712705
RAG2	1.143599	0.2527899734904794	0.9999789744458218	2.9313488
MRPL54	1.1415085	0.2536583995927847	0.9999789744458218	0.44661558
ERG	1.1408848	0.2539178696467078	0.9999789744458218	1.9352626
FLT3	1.1399186	0.2543202302300158	0.9999789744458218	1.9823341
SMAGP	1.1387415	0.2548109776702976	0.9999789744458218	2.957591
CERS4	1.1386098	0.25486595304560655	0.9999789744458218	2.0470214
TDG	1.1380037	0.2551189460117187	0.9999789744458218	0.72312105
SETD5	1.1380037	0.2551189460117187	0.9999789744458218	0.7190054
AC004687.1	1.1351402	0.2563166071775077	0.9999789744458218	1.5147941
ATP6V1G1	1.1343715	0.25663872895515316	0.9999789744458218	0.9139115
CREBRF	1.1338137	0.25687267326736163	0.9999789744458218	1.4196736
EPC2	1.133805	0.2568763586133822	0.9999789744458218	1.0472689
NDUFA7	1.1290002	0.2588977460980183	0.9999789744458218	1.9445739
BOD1L1	1.1287279	0.2590126328008683	0.9999789744458218	0.50065047
FBL	1.1268702	0.2597973991319391	0.9999789744458218	0.33793572
POLR2A	1.1261718	0.2600928074613209	0.9999789744458218	0.81367356
FCHO1	1.125636	0.26031963054706264	0.9999789744458218	2.3416836
DDX5	1.1254208	0.2604107701404794	0.9999789744458218	0.11848085
GBP4	1.12474	0.260699214226923	0.9999789744458218	1.4728147
IGKC	1.1244721	0.26081279151396586	0.9999789744458218	-0.5690578
RGS19	1.1243623	0.26085934946875333	0.9999789744458218	0.557283
NIPSNAP2	1.1238177	0.26109036188867496	0.9999789744458218	0.58039844
RETREG2	1.1228163	0.26151549577563715	0.9999789744458218	0.9715156
C15orf61	1.1215559	0.2620513223144403	0.9999789744458218	0.9414788
DLG1	1.1213714	0.2621297995320985	0.9999789744458218	0.7674639
AKAP13	1.1213275	0.2621484869767613	0.9999789744458218	0.37272915
HPS4	1.1212001	0.2622026857708498	0.9999789744458218	1.3514023
ARPP21	1.1210245	0.26227745542935066	0.9999789744458218	1.7280031
HNRNPU	1.120818	0.2623653285958316	0.9999789744458218	0.16078012
HADHA	1.1201197	0.26266275239603154	0.9999789744458218	0.45564976
FBXO21	1.1200758	0.2626814660740645	0.9999789744458218	1.297901
NDUFA1	1.119417	0.2629622817223122	0.9999789744458218	0.1929273
HSPA9	1.1191579	0.26307279264396277	0.9999789744458218	0.44171336
ARHGEF2	1.1176822	0.2637027540737318	0.9999789744458218	1.0621022
TATDN1	1.1166238	0.2641552418166938	0.9999789744458218	0.5213868
RF00003-11	1.115618	0.264585694854814	0.9999789744458218	1.9229583
SNRPN	1.1151744	0.2647756988866973	0.9999789744458218	0.61719114
PRPF39	1.1140149	0.2652727871442584	0.9999789744458218	1.225236
LRRC26	1.1131498	0.26564413901379014	0.9999789744458218	2.2569587
QPRT	1.1129037	0.2657497662792352	0.9999789744458218	1.2115449
AL137857.1	1.1124953	0.26592524687388475	0.9999789744458218	1.9893699
ZNRD1	1.1105189	0.26677547328115425	0.9999789744458218	0.6332175
EIF3B	1.1099744	0.26701008616843136	0.9999789744458218	0.51413715
CD19	1.1075193	0.2680694977326259	0.9999789744458218	3.6782093
ZC3H12D	1.1065662	0.2684815312373857	0.9999789744458218	3.6838949
APH1A	1.1059557	0.26874568896671414	0.9999789744458218	0.48045644
CASP8	1.1054945	0.26894535086131655	0.9999789744458218	1.0058863
SLC39A10	1.1047919	0.26924979333960664	0.9999789744458218	1.2342243
NUP88	1.1042649	0.26947828036364074	0.9999789744458218	1.2965587
NABP2	1.1036894	0.2697278638947114	0.9999789744458218	1.3047892
ZC3H7A	1.1022972	0.2703324739541142	0.9999789744458218	0.6364596
LSM14A	1.1017307	0.2705787798223731	0.9999789744458218	0.52286667
USP11	1.1011597	0.27082715062261864	0.9999789744458218	1.1649792
AC008105.3	1.1005185	0.27110627636005835	0.9999789744458218	1.6657939
SUZ12P1	1.0994425	0.27157511505977916	0.9999789744458218	0.5543096
PRR7	1.0976593	0.27235326967232687	0.9999789744458218	2.130838
ATP5ME	1.097027	0.2726296316259422	0.9999789744458218	0.17579974
UBE2E1	1.0943434	0.27380438454363665	0.9999789744458218	0.80263424
DHPS	1.0935792	0.2741395615271842	0.9999789744458218	0.7793099
XPA	1.0927843	0.2744885200077156	0.9999789744458218	0.6601969
ATXN2L	1.0917566	0.27494010918486667	0.9999789744458218	1.4191518
RCC2	1.0910231	0.27526270719802093	0.9999789744458218	1.0713133
MAP2K2	1.0903907	0.2755410828924816	0.9999789744458218	0.2823943
CEP135	1.0901228	0.2756590638327626	0.9999789744458218	1.8652191
MKLN1	1.087716	0.27672050378471125	0.9999789744458218	1.2101182
NRIP1	1.0852214	0.2778236189857153	0.9999789744458218	1.4827685
VAMP2	1.084018	0.278356824689749	0.9999789744458218	0.83749163
USP15	1.0839828	0.278372403196376	0.9999789744458218	0.24005955
CHURC1-FNTB	1.0835348	0.278571081166864	0.9999789744458218	0.6596856
CDK13	1.0834295	0.2786178429430052	0.9999789744458218	0.83795685
EBF1	1.0833064	0.2786724050983377	0.9999789744458218	0.8944837
MAP7D1	1.0809393	0.2797241435675175	0.9999789744458218	0.83546925
INO80D	1.0795821	0.2803283034162195	0.9999789744458218	1.558209
WHAMM	1.0792483	0.2804770350864092	0.9999789744458218	1.8317336
PFDN1	1.0779483	0.28105681662617754	0.9999789744458218	0.48752066
EWSR1	1.0776716	0.28118032100893076	0.9999789744458218	0.47072816
TXLNGY	1.0776365	0.2811960067406488	0.9999789744458218	1.2891271
UBE2E2	1.0760158	0.2819201566564341	0.9999789744458218	1.2487344
RNU5B-1	1.0739604	0.28284040874691263	0.9999789744458218	1.5408231
CEP95	1.0733105	0.2831318518606377	0.9999789744458218	1.2205076
MRPL15	1.0726297	0.283437297502954	0.9999789744458218	0.7855807
DCAF13	1.0725638	0.28346686859900916	0.9999789744458218	1.1871614
PA2G4	1.0723705	0.28355362253523964	0.9999789744458218	1.0351894
NDUFB10	1.0709388	0.28419695047579374	0.9999789744458218	0.20295933
JCHAIN	1.0701	0.28457432822419826	0.9999789744458218	0.7873113
UBA6	1.070078	0.28458421177480686	0.9999789744458218	1.3780689
HNRNPA3	1.0687208	0.28519546591933653	0.9999789744458218	0.25025696
MED10	1.0682378	0.285413278602783	0.9999789744458218	0.49542826
COPS7B	1.067636	0.2856847116225526	0.9999789744458218	1.5306062
GNB1	1.0671266	0.2859146744875586	0.9999789744458218	0.5655173
CFDP1	1.0665162	0.2861903981466425	0.9999789744458218	0.3773811
ARL16	1.0664635	0.2862142100485815	0.9999789744458218	0.92873424
TOMM5	1.0658705	0.2864821861724408	0.9999789744458218	0.85277295
GPSM3	1.0652381	0.2867682140941171	0.9999789744458218	0.22162536
CSNK2B	1.0641972	0.28723938808849137	0.9999789744458218	0.26473752
H2AC8	1.0639644	0.28734482755906365	0.9999789744458218	1.6786467
PRPF38B	1.0637711	0.2874323820546276	0.9999789744458218	0.6614868
LINC01873	1.0632617	0.28766329382655864	0.9999789744458218	1.1102263
DCAF16	1.0628576	0.2878465197145603	0.9999789744458218	1.4087049
CLPX	1.0623921	0.2880577253839943	0.9999789744458218	1.0311749
CDKN1B	1.0613337	0.2885383082495988	0.9999789744458218	0.6661843
GTF2F1	1.0584877	0.28983317691122046	0.9999789744458218	0.5306046
VPS26B	1.058369	0.2898872145415613	0.9999789744458218	1.1988431
SRRM2	1.057921	0.2900914179100592	0.9999789744458218	0.17860611
NUMA1	1.0575609	0.29025565159239086	0.9999789744458218	0.71216244
FTX	1.0570866	0.29047205483360583	0.9999789744458218	0.6845327
CYCS	1.0570164	0.2905041238034505	0.9999789744458218	0.60143065
SNX29	1.0568451	0.29058230189715706	0.9999789744458218	0.9776708
TUSC2	1.0561863	0.29088311877699047	0.9999789744458218	0.88331944
AL035078.1	1.0560721	0.2909352816609865	0.9999789744458218	1.2556621
PROM1	1.0559139	0.2910075175782121	0.9999789744458218	3.0512516
ARHGAP5	1.0554528	0.2912182745599011	0.9999789744458218	1.3411262
DDX3X	1.0513157	0.2931136558162504	0.9999789744458218	0.1666573
TMSB10	1.0507798	0.2933597340466294	0.9999789744458218	0.19214365
TSPAN3	1.050402	0.2935332823072204	0.9999789744458218	0.37909237
N4BP2L1	1.049651	0.29387856543413016	0.9999789744458218	0.94376993
RASGEF1B	1.0470686	0.2950679328806659	0.9999789744458218	0.8719026
TNRC6B	1.0462649	0.295438750223307	0.9999789744458218	0.54138994
CLIP2	1.0461947	0.2954711862411077	0.9999789744458218	2.314484
UNK	1.0436121	0.2966648641744909	0.9999789744458218	1.4737806
HDAC7	1.0427382	0.2970695765825855	0.9999789744458218	0.92626274
R3HDM1	1.0418553	0.2974787310357857	0.9999789744458218	0.82095253
MEIS1	1.0413898	0.29769465565356146	0.9999789744458218	1.597523
NFKBID	1.0410956	0.29783119031642336	0.9999789744458218	1.5863727
LEF1	1.0409682	0.2978903003816544	0.9999789744458218	1.9127706
TPD52	1.0406388	0.29804320758569003	0.9999789744458218	1.4714608
SLBP	1.0406125	0.2980554424266575	0.9999789744458218	0.52150416
RERE	1.0400635	0.2983104112522552	0.9999789744458218	0.8119707
SUN2	1.0397165	0.2984716266503912	0.9999789744458218	1.4983371
DLST	1.0392202	0.29870232699752375	0.9999789744458218	0.9281806
CPNE1	1.0386317	0.2989760551080556	0.9999789744458218	0.54110885
DIS3L2	1.0374459	0.2995281052012311	0.9999789744458218	1.5579714
TBCA	1.0371604	0.29966110763930276	0.9999789744458218	0.17236288
AC245407.2	1.0363963	0.3000173387712214	0.9999789744458218	0.8324344
IRAK1	1.0359175	0.30024063884098984	0.9999789744458218	0.7600751
FPGS	1.0351138	0.3006157862145826	0.9999789744458218	1.248171
RNVU1-19	1.0334843	0.30137728904887684	0.9999789744458218	1.3117489
STAT5A	1.030814	0.3026280257351608	0.9999789744458218	0.7861501
PPP3CA	1.0292286	0.3033722817702744	0.9999789744458218	0.77447665
UBALD1	1.0292066	0.30338259855946803	0.9999789744458218	1.4363471
ACAP1	1.027586	0.30414462120676344	0.9999789744458218	0.6279111
GFOD1	1.0272874	0.30428518673303095	0.9999789744458218	1.9665843
SERP1	1.0266329	0.30459334140746674	0.9999789744458218	0.157094
AC007952.4	1.0262464	0.3047754360735089	0.9999789744458218	0.8395157
INAFM2	1.0258161	0.30497830833459816	0.9999789744458218	1.696941
MEF2D	1.0251001	0.30531593716305194	0.9999789744458218	0.88321143
ZMYM2	1.024314	0.3056869930223719	0.9999789744458218	0.7015975
ANGEL2	1.0241295	0.30577409970535174	0.9999789744458218	0.9779774
SYNJ2	1.0232862	0.3061725112627576	0.9999789744458218	2.2651038
BTF3L4	1.0215207	0.30700779939616474	0.9999789744458218	0.52623326
KMT2D	1.0214725	0.3070306767328449	0.9999789744458218	1.6618305
TPT1-AS1	1.0194565	0.3079862920646912	0.9999789744458218	1.1837046
IPO7	1.0164217	0.30942862753849887	0.9999789744458218	1.4369961
C3orf38	1.0153413	0.3099431828490826	0.9999789744458218	1.1956596
HIPK1	1.0134747	0.3108334810816531	0.9999789744458218	0.5808916
AC004151.1	1.012671	0.31121735224118185	0.9999789744458218	0.6440165
ANAPC15	1.0123811	0.3113558742688719	0.9999789744458218	0.5145247
MAP9	1.0109581	0.31203648118377525	0.9999789744458218	1.3536322
CALCOCO2	1.009232	0.3128633471937753	0.9999789744458218	0.46145302
SELENOO	1.007752	0.3135735381848167	0.9999789744458218	1.2889519
LINC02256	1.0064476	0.31420031231776113	0.9999789744458218	1.1050993
IK	1.0057888	0.31451717784547306	0.9999789744458218	0.2755329
SNHG15	1.004625	0.31507748689225323	0.9999789744458218	0.8074528
SIPA1	1.0043921	0.31518962736406364	0.9999789744458218	0.7748522
SH3GLB2	1.0032108	0.3157591974291343	0.9999789744458218	0.9287379
CD72	1.0029209	0.31589904643931066	0.9999789744458218	2.5762398
CUEDC2	1.0025651	0.31607073488971127	0.9999789744458218	0.54953694
C16orf54	1.0019459	0.31636974606811885	0.9999789744458218	1.1501215
SNRPB2	1.001186	0.3167368714811154	0.9999789744458218	0.3068207
KAT6A	1.0008215	0.3169131059676217	0.9999789744458218	1.0589619
LINC00342	1.0003911	0.3171212728504246	0.9999789744458218	1.131677
FIBP	0.99844545	0.31806339072975387	0.9999789744458218	0.4052373
ZEB2	0.99713665	0.31869817109825915	0.9999789744458218	0.17501049
BCL10	0.9966096	0.31895402146923924	0.9999789744458218	1.1194814
FBXO7	0.99639004	0.3190606654629581	0.9999789744458218	0.48000312
HDAC2	0.99590695	0.31929536439426875	0.9999789744458218	0.5573943
SMC6	0.99588937	0.3193039010291636	0.9999789744458218	1.0070087
CMC2	0.99519545	0.31964121757205033	0.9999789744458218	0.6782914
DYRK3	0.99357045	0.3204320478578816	0.9999789744458218	2.5595627
SEPHS2	0.99328494	0.3205711094686926	0.9999789744458218	0.71343243
HHIP	0.99313563	0.3206438650979647	0.9999789744458218	3.471231
CNOT11	0.99279743	0.3208086750899075	0.9999789744458218	1.2147957
IDI1	0.99061465	0.3218737800990553	0.9999789744458218	0.620184
POLE3	0.9884538	0.32293044066516097	0.9999789744458218	0.47806054
GNG2	0.98842746	0.32294334071417263	0.9999789744458218	0.89086974
C17orf49	0.9846416	0.32480013939982566	0.9999789744458218	2.4831884
OTUD1	0.9826784	0.32576573408599807	0.9999789744458218	1.4592758
OTUD5	0.98212504	0.3260382520191608	0.9999789744458218	1.072492
MOB1B	0.98152775	0.32633256461499816	0.9999789744458218	1.2193213
AP1G1	0.98119396	0.32649710859414405	0.9999789744458218	0.69509244
ST8SIA4	0.9811676	0.32651010120383994	0.9999789744458218	1.760735
P2RX5	0.98037267	0.32690220284925864	0.9999789744458218	2.7747421
CPT1A	0.97896284	0.3275983393517389	0.9999789744458218	0.82218254
ITSN2	0.9780757	0.32803689943493486	0.9999789744458218	0.74084646
MXI1	0.97660875	0.3287628784997316	0.9999789744458218	0.74581534
GLRX3	0.9765034	0.32881508474112187	0.9999789744458218	0.71461296
TMUB1	0.9758885	0.3291197282522672	0.9999789744458218	0.85301983
ROCK1	0.97558105	0.3292721185787699	0.9999789744458218	0.75638765
ZMYND8	0.9751638	0.3294790071392819	0.9999789744458218	0.70886385
DCAF11	0.9748037	0.3296576523342126	0.9999789744458218	0.94173384
HNRNPH2	0.9740307	0.33004129772350954	0.9999789744458218	0.79945207
ACIN1	0.97393847	0.33008709288995697	0.9999789744458218	0.8016578
RANBP9	0.97391653	0.3300979971073631	0.9999789744458218	2.0285177
ADAM17	0.9738506	0.33013071115883996	0.9999789744458218	1.1738425
ZPR1	0.97198844	0.33105629649140234	0.9999789744458218	2.0309002
H4C5	0.97170734	0.3311961531461233	0.9999789744458218	3.278069
PPP2R5E	0.97023606	0.3319288386729261	0.9999789744458218	0.8786475
BUD31	0.96942794	0.3323317142576775	0.9999789744458218	0.487127
AC026124.2	0.96703434	0.33352686679241395	0.9999789744458218	1.9328234
ENSA	0.9656992	0.3341947240252785	0.9999789744458218	0.7110493
LINC00662	0.962862	0.33561678151844454	0.9999789744458218	1.3315153
GPN1	0.9614478	0.3363270617678277	0.9999789744458218	1.1633502
MOAP1	0.96125454	0.336424193749411	0.9999789744458218	1.6318445
ATP5MC3	0.960912	0.3365964266095176	0.9999789744458218	0.14461364
AKR1A1	0.9600292	0.337040518775759	0.9999789744458218	0.45536786
ACADM	0.9576619	0.3382332513440809	0.9999789744458218	0.59969425
GTF2H2	0.9551146	0.33951973496417387	0.9999789744458218	1.1368524
AUTS2	0.95503557	0.3395597104588589	0.9999789744458218	1.2971939
PSMD3	0.9537004	0.3402353080746121	0.9999789744458218	0.60432196
KPNA4	0.9511092	0.3415489572273389	0.9999789744458218	0.89135814
PRMT1	0.94879025	0.3427273104112979	0.9999789744458218	0.32330778
CDKN2AIPNL	0.94851357	0.3428680827011453	0.9999789744458218	1.3067889
AC136944.2	0.9482193	0.34301783345765224	0.9999789744458218	2.948355
MARCHF7	0.94747704	0.3433957486220536	0.9999789744458218	0.5136344
MAPKAPK5	0.9469851	0.3436463477570999	0.9999789744458218	1.4599328
AC092279.1	0.9458828	0.3442083823546147	0.9999789744458218	1.96647
CUL3	0.943823	0.3452601298903325	0.9999789744458218	0.7549157
APOL3	0.94301045	0.3456755612427902	0.9999789744458218	1.0175586
ELP6	0.94102967	0.3466896498026619	0.9999789744458218	0.86223096
AHCY	0.9410165	0.34669640173781835	0.9999789744458218	0.7299823
SPAG9	0.94082326	0.3467954397380155	0.9999789744458218	0.6739891
CIR1	0.940753	0.3468314580210099	0.9999789744458218	0.4104406
LMBR1L	0.9400415	0.3471962772406473	0.9999789744458218	1.4821168
ZNF22	0.9383023	0.3480890850792021	0.9999789744458218	1.0475705
EIF2AK2	0.93771815	0.34838926938303283	0.9999789744458218	0.57284486
AC004156.1	0.935509	0.3495260400057699	0.9999789744458218	0.6677028
USP12	0.9351137	0.34972968638975965	0.9999789744458218	1.5270774
HMGXB4	0.9343408	0.3501281457738147	0.9999789744458218	0.5955204
CYLD	0.934209	0.35019609370543936	0.9999789744458218	0.7935269
ZNF254	0.93184173	0.3514183165225686	0.9999789744458218	1.6034188
F8A1	0.9305813	0.3520702117593765	0.9999789744458218	1.4195964
GRIK5	0.93040556	0.35216112899049024	0.9999789744458218	4.278487
SIAH1	0.93011135	0.3523134486473938	0.9999789744458218	1.2703085
CCDC69	0.9284204	0.3531895264292102	0.9999789744458218	0.5059524
PIK3C3	0.9263562	0.35426088971397496	0.9999789744458218	1.3382459
TLE1	0.9261981	0.35434303614036133	0.9999789744458218	1.7626786
HERC2	0.9251836	0.35487042863072804	0.9999789744458218	1.1105917
HEXD	0.9235893	0.3557001888567217	0.9999789744458218	0.916305
PSMC6	0.92343557	0.35578025791933166	0.9999789744458218	0.55059326
NIPSNAP1	0.9232731	0.3558649147162597	0.9999789744458218	1.7671542
MRPL22	0.9230535	0.3559793359739226	0.9999789744458218	0.53781664
ZNF32	0.9221092	0.35647161168432884	0.9999789744458218	1.191275
KDSR	0.92083555	0.3571362907602006	0.9999789744458218	0.81889695
H4-16	0.9207082	0.357202801571312	0.9999789744458218	1.7407408
PPDPF	0.9196058	0.3577787900027247	0.9999789744458218	0.1742276
LUC7L	0.91946524	0.3578522647809782	0.9999789744458218	0.7081735
PPP4R3B	0.9192852	0.3579464182172324	0.9999789744458218	0.9441388
PPM1A	0.91864836	0.3582795249178554	0.9999789744458218	0.9440526
SIN3A	0.91740984	0.35892791820570313	0.9999789744458218	1.0279553
SWAP70	0.9173879	0.3589394211919156	0.9999789744458218	1.3129617
LINC01684	0.91636014	0.35947802013331953	0.9999789744458218	2.1449926
PLEKHM1P1	0.9162943	0.35951256301506596	0.9999789744458218	1.611511
CARD9	0.91582435	0.35975902939364657	0.9999789744458218	0.4924963
THUMPD2	0.91488886	0.36024997453488405	0.9999789744458218	0.968556
AC010883.3	0.9141554	0.36063518795920835	0.9999789744458218	1.1532571
TRIM56	0.91043985	0.3625905973921977	0.9999789744458218	1.3130119
BTBD3	0.9098118	0.3629217764618192	0.9999789744458218	2.1738873
KMT2A	0.9089861	0.363357460732153	0.9999789744458218	0.75022286
ACTR1A	0.90884995	0.3634293337058555	0.9999789744458218	0.865237
DKC1	0.9078925	0.36393501418310836	0.9999789744458218	0.44395566
SMARCA5-AS1	0.9063729	0.36473851080311537	0.9999789744458218	0.561603
SELENOF	0.9061138	0.3648756337632689	0.9999789744458218	0.21802677
OTULIN	0.9055077	0.3651964877771452	0.9999789744458218	1.1551186
GARS1	0.9050992	0.36541281483182775	0.9999789744458218	0.7605654
THAP11	0.9048225	0.3655594044120428	0.9999789744458218	0.9208448
CUL5	0.904559	0.36569904766031514	0.9999789744458218	0.8606144
SPEN	0.9029472	0.36655392336168313	0.9999789744458218	1.2007608
HNRNPA2B1	0.9025607	0.366759092266319	0.9999789744458218	0.10508569
AC005332.4	0.9021478	0.36697832902879535	0.9999789744458218	2.548993
SDHA	0.9021127	0.3669969912477974	0.9999789744458218	0.5825664
ARFGAP2	0.9017877	0.36716964481524694	0.9999789744458218	0.58878565
SLC7A5	0.9008566	0.36766455412441623	0.9999789744458218	1.3214151
ARHGAP27	0.8999431	0.3681505291366872	0.9999789744458218	1.0829496
USP34	0.899359	0.36846148227549236	0.9999789744458218	0.80521286
MRPS35	0.89867383	0.3688264174918302	0.9999789744458218	0.6577317
AKIRIN1	0.89751875	0.3694421697089939	0.9999789744458218	0.69539
ERC1	0.89712787	0.369650686776706	0.9999789744458218	0.99022967
TMEM126A	0.89697415	0.3697327079064926	0.9999789744458218	0.60041434
RFC2	0.89685994	0.3697936452100875	0.9999789744458218	0.90827847
TMEM11	0.89639443	0.37004214649732237	0.9999789744458218	0.7569768
OSBPL10	0.8954106	0.3705676224734503	0.9999789744458218	1.3853731
ACSF3	0.894664	0.37096673030408933	0.9999789744458218	1.1933182
HDAC10	0.89389104	0.37138020526373683	0.9999789744458218	1.4429158
TMED10	0.8936319	0.3715188773105478	0.9999789744458218	0.20904371
TFAM	0.8931883	0.3717563395947777	0.9999789744458218	0.4860158
ICE1	0.89195853	0.37241514290105104	0.9999789744458218	0.98586714
AATF	0.89180046	0.3724998986437179	0.9999789744458218	0.6448491
MDM2	0.89144033	0.3726929980058348	0.9999789744458218	0.7997981
MYEF2	0.89069366	0.3730935234628573	0.9999789744458218	2.5239003
HARS1	0.8898109	0.37356742966719436	0.9999789744458218	1.3173511
AC118553.2	0.8882869	0.3743864426016339	0.9999789744458218	1.4243685
PAG1	0.8879751	0.3745541583618732	0.9999789744458218	2.0115242
GALNT7	0.8868112	0.37518054988519633	0.9999789744458218	1.1447686
CLPP	0.88629293	0.3754596795476788	0.9999789744458218	0.56935483
NSD3	0.88572204	0.3757673437412551	0.9999789744458218	0.26589075
FBXO11	0.88547605	0.37589992396928384	0.9999789744458218	0.9777021
NNT	0.8848173	0.37625519184075373	0.9999789744458218	0.9316535
ZBTB44	0.88448787	0.3764329034595747	0.9999789744458218	1.1673025
FAM204A	0.88428146	0.3765442958009261	0.9999789744458218	0.30387336
VPS36	0.8829507	0.3772629089675019	0.9999789744458218	0.6317702
SESN1	0.882674	0.3774124296898642	0.9999789744458218	1.9360738
HBS1L	0.8824412	0.3775382452505103	0.9999789744458218	0.7123206
BACH2	0.88122904	0.37819385343639134	0.9999789744458218	2.3852272
U47924.2	0.88044727	0.37861704489242676	0.9999789744458218	1.1418884
TMEM179B	0.88042533	0.3786289365005797	0.9999789744458218	0.9237876
ATP6V0E2	0.88018817	0.3787573805184169	0.9999789744458218	2.3895288
CXorf21	0.8801179	0.378795443154995	0.9999789744458218	1.3197539
COPS9	0.87992465	0.37890012754390745	0.9999789744458218	0.24015911
HERC2P3	0.87932736	0.37922381002034145	0.9999789744458218	1.2331845
ZFP62	0.8791868	0.379299995317278	0.9999789744458218	1.907471
IDS	0.8773158	0.3803151088204869	0.9999789744458218	0.91324365
AC005747.1	0.8772192	0.3803675778134994	0.9999789744458218	0.8295266
UQCRFS1P1	0.8769425	0.3805178545327004	0.9999789744458218	1.8968303
APRT	0.87652093	0.3807469177521837	0.9999789744458218	0.22791229
CRYZL1	0.87468505	0.38174528400683516	0.9999789744458218	1.2514727
DNPEP	0.87426347	0.38197480044848175	0.9999789744458218	0.7414629
WASHC4	0.87317866	0.3825657160428251	0.9999789744458218	0.55460554
C1QTNF4	0.87313473	0.3825896515471734	0.9999789744458218	0.3874289
SPOCK2	0.87029314	0.3841402290488023	0.9999789744458218	1.8564786
RN7SL2	0.8701745	0.3842050197755854	0.9999789744458218	1.312757
DEDD2	0.86930054	0.3846827576505282	0.9999789744458218	0.8803826
TTC7A	0.86926544	0.38470197078586743	0.9999789744458218	1.2539564
TCOF1	0.867759	0.38552628583077564	0.9999789744458218	0.72511864
PSMC4	0.8676404	0.3855912193897959	0.9999789744458218	0.53607166
DHX15	0.8670124	0.38593523815086805	0.9999789744458218	0.8466814
AEBP2	0.8668455	0.38602668723726996	0.9999789744458218	1.2663025
RMND5A	0.866112	0.38642873874102623	0.9999789744458218	1.4180886
BRMS1	0.8660813	0.38644559677857115	0.9999789744458218	0.63203925
H4C11	0.8647637	0.38716850590066754	0.9999789744458218	1.5480062
GTF2A2	0.86446506	0.3873324798881054	0.9999789744458218	0.2265521
ATM	0.8642498	0.3874506638614368	0.9999789744458218	0.679627
ZNF830	0.8625282	0.388396926925781	0.9999789744458218	1.2571805
PRPF19	0.8620231	0.3886747964227324	0.9999789744458218	0.7328806
PABPN1	0.86156636	0.38892619129690464	0.9999789744458218	0.5031722
SRSF5	0.8611579	0.38915108013453137	0.9999789744458218	0.13457748
NELFA	0.8588961	0.3903978641587451	0.9999789744458218	1.1983374
YRDC	0.8585842	0.3905699410901319	0.9999789744458218	1.344207
CCDC137	0.8585491	0.39058933292857057	0.9999789744458218	1.2532059
TSSC4	0.8579825	0.39090210708659445	0.9999789744458218	0.5301766
GLRX5	0.85703385	0.3914261624479888	0.9999789744458218	0.20914084
CD200	0.8566737	0.39162522102065767	0.9999789744458218	1.0685279
ZNF124	0.8561906	0.3918923472769813	0.9999789744458218	1.5310876
FAM133DP	0.85574263	0.39214014492167226	0.9999789744458218	2.9786358
CTCF	0.8549038	0.3926044136829605	0.9999789744458218	0.6439046
PDHX	0.85475445	0.3926870933082508	0.9999789744458218	1.2388827
POM121C	0.8540561	0.3930738822138584	0.9999789744458218	0.8903594
LUZP1	0.8537048	0.39326858024549205	0.9999789744458218	0.7501135
SUSD3	0.8532568	0.3935169049464097	0.9999789744458218	1.7578461
HMGN4	0.8523301	0.3940308975493294	0.9999789744458218	0.7642366
NR2C1	0.85112673	0.3946989632589165	0.9999789744458218	1.331088
YBEY	0.85094666	0.3947989881874068	0.9999789744458218	1.1429507
AC243960.1	0.84997165	0.3953408527497062	0.9999789744458218	3.0420823
H2BC7	0.8495324	0.395585082653246	0.9999789744458218	2.1025875
LAMTOR5	0.8492118	0.39576342803484843	0.9999789744458218	0.20468856
PSMB8	0.84805673	0.39640636264632745	0.9999789744458218	0.18179052
SMARCC1	0.84769225	0.3966093967825991	0.9999789744458218	0.9153671
NEMF	0.84677434	0.397120929338168	0.9999789744458218	0.47732875
TMEM259	0.8463439	0.39736092369517606	0.9999789744458218	0.3668416
THRA	0.8462034	0.3974393081375205	0.9999789744458218	0.6843435
AC136632.2	0.84593105	0.39759120452349395	0.9999789744458218	2.1536388
PAFAH1B1	0.8455094	0.3978264679655388	0.9999789744458218	0.3544602
EIF2B2	0.84528106	0.39795393735510676	0.9999789744458218	1.267185
PPP1R16B	0.84456515	0.398353664332864	0.9999789744458218	2.8194885
PWWP2A	0.8445037	0.3983880079858897	0.9999789744458218	0.7360518
KLF10	0.84387565	0.39873890600316164	0.9999789744458218	0.5933596
AL050309.1	0.84268105	0.3994068617828813	0.9999789744458218	2.1382222
AC138649.1	0.84252733	0.39949286083417224	0.9999789744458218	2.8280423
LINC01374	0.8423692	0.3995813286217058	0.9999789744458218	2.8016915
RPAP3	0.8418466	0.3998738476578102	0.9999789744458218	0.86747384
CCNT2	0.84163135	0.39999433409084784	0.9999789744458218	1.2110106
KATNAL1	0.841583	0.4000213850653387	0.9999789744458218	2.1318862
RBM33	0.84101206	0.4003411617027971	0.9999789744458218	0.68523514
ALKBH5	0.8403533	0.4007103255910611	0.9999789744458218	0.73236597
DCP2	0.8400195	0.4008974466601344	0.9999789744458218	0.4586781
SMAP1	0.839879	0.40097625017758476	0.9999789744458218	1.4870764
SORL1	0.83919823	0.4013580863619266	0.9999789744458218	0.6560057
SMG1	0.8388732	0.40154045930324034	0.9999789744458218	0.5269758
ELP2	0.83868873	0.4016439903919541	0.9999789744458218	0.77846706
RIMKLB	0.8361414	0.40307534291764013	0.9999789744458218	1.770403
NAT14	0.8352674	0.40356714824385054	0.9999789744458218	1.7246318
USP16	0.833559	0.4045295535748905	0.9999789744458218	0.7760095
EIF4A3	0.83308464	0.4047969942326499	0.9999789744458218	0.40172267
PCGF3	0.8324215	0.4051710930961743	0.9999789744458218	1.139707
RRP15	0.8323907	0.4051884404381716	0.9999789744458218	0.9619254
WDR83	0.8320877	0.4053594594207153	0.9999789744458218	1.459727
FNIP1	0.8320525	0.4053792904987781	0.9999789744458218	0.7476196
AMD1	0.832013	0.4054016011545948	0.9999789744458218	0.4342368
TIMM23B	0.83186805	0.4054834131701488	0.9999789744458218	1.1277342
ABRAXAS1	0.8311478	0.40589014041102756	0.9999789744458218	1.4622327
ZEB1	0.8310204	0.4059620870357702	0.9999789744458218	1.0311372
CBX3	0.8307964	0.40608863233120107	0.9999789744458218	0.21496713
RBM5	0.8306295	0.4061829362940559	0.9999789744458218	0.43881086
TXNL1	0.8299751	0.40655283322376623	0.9999789744458218	0.29991788
CAND1	0.82844675	0.40741753626313437	0.9999789744458218	0.71261305
ZFAND1	0.8278802	0.4077383510993716	0.9999789744458218	0.70611537
DPH7	0.82693154	0.4082758664159334	0.9999789744458218	1.1273936
UPF3B	0.82661533	0.40845513193636096	0.9999789744458218	1.1643534
PRPF8	0.82610583	0.40874404718065227	0.9999789744458218	0.63601935
METTL23	0.8256359	0.40901065442122864	0.9999789744458218	0.5835955
SMURF2	0.8251704	0.40927487202242097	0.9999789744458218	1.054039
KATNBL1	0.8251133	0.4093072830569662	0.9999789744458218	0.65252066
KRT10	0.8246258	0.40958408560445847	0.9999789744458218	0.20730898
UNC13D	0.82381326	0.4100456705055272	0.9999789744458218	1.0053339
PXK	0.8235585	0.4101904472519504	0.9999789744458218	0.7116938
SPNS3	0.82298756	0.41051505719277737	0.9999789744458218	0.88713753
H2BC5	0.8224386	0.4108273260128744	0.9999789744458218	1.3325999
CHD1	0.8223815	0.4108598100666535	0.9999789744458218	0.6726905
AC243571.2	0.8216744	0.4112622389868462	0.9999789744458218	1.3166647
ADH5	0.81880647	0.4128968480292333	0.9999789744458218	0.37682727
CHMP4B	0.81805104	0.413328043172424	0.9999789744458218	0.8145309
GTF2I	0.81775236	0.41349858919555704	0.9999789744458218	0.4620042
IRX1	0.81717265	0.41382976803356253	0.9999789744458218	4.0576057
ETFDH	0.8166193	0.4141460396820241	0.9999789744458218	1.0973225
IP6K2	0.81624156	0.4143619897203016	0.9999789744458218	0.60778254
SCAF11	0.81554323	0.41476142153846507	0.9999789744458218	0.30738193
HUWE1	0.8154598	0.41480916760598663	0.9999789744458218	0.90004283
DNMT3A	0.8141159	0.415578578051198	0.9999789744458218	1.0880607
TFB2M	0.81321114	0.4160970215803693	0.9999789744458218	1.9895141
BMI1	0.81320673	0.41609953922731246	0.9999789744458218	1.4665604
H2AC19	0.8128246	0.416318608930658	0.9999789744458218	1.6125162
STK16	0.81264454	0.4164218722676294	0.9999789744458218	0.9097243
FRYL	0.8120253	0.41677711274337037	0.9999789744458218	0.65062785
RO60	0.81160367	0.41701908084365935	0.9999789744458218	0.41758397
H2AC17	0.8110986	0.41730904748388953	0.9999789744458218	1.5757486
MRPS33	0.807607	0.4193168478352607	0.9999789744458218	0.5033536
PRKRIP1	0.807607	0.4193168478352607	0.9999789744458218	0.834393
STK4	0.80758506	0.41932949346056825	0.9999789744458218	0.42876992
PUM1	0.80536276	0.4206103901125148	0.9999789744458218	0.37005332
OSBPL3	0.8039793	0.4214089452312525	0.9999789744458218	2.4610245
KARS1	0.8037377	0.42154846663741163	0.9999789744458218	0.5457889
DYNC1LI2	0.8035928	0.4216321924847064	0.9999789744458218	0.64281625
INO80E	0.80328095	0.42181236297459146	0.9999789744458218	1.5969045
DTX3L	0.80160326	0.42278250550867114	0.9999789744458218	1.2070938
GINM1	0.8014627	0.42286383327198795	0.9999789744458218	0.8477057
AK3	0.8002988	0.4235376808250926	0.9999789744458218	0.8814815
MAP4K2	0.8000353	0.4236903372769839	0.9999789744458218	1.5873333
METTL5	0.8000002	0.42371069390254257	0.9999789744458218	0.40738717
CYTIP	0.7989373	0.424326752238002	0.9999789744458218	0.71678764
RGL2	0.7988012	0.4244057066210474	0.9999789744458218	0.80508333
DCUN1D1	0.79810286	0.4248108011622561	0.9999789744458218	0.84175104
SNRPA1	0.7979404	0.4249051008389678	0.9999789744458218	0.43797946
ATG10	0.7970049	0.425448198934541	0.9999789744458218	1.3590889
GET4	0.79674137	0.4256012574453504	0.9999789744458218	1.5755305
MRPL42	0.79667985	0.425636975722412	0.9999789744458218	0.73429024
ALKBH3	0.79380316	0.4273100359004668	0.9999789744458218	1.186205
ATIC	0.79357916	0.42744046527611945	0.9999789744458218	0.6096507
KLF16	0.79283255	0.42787539730428326	0.9999789744458218	1.2359618
CD34	0.792591	0.4280161657502186	0.9999789744458218	1.3793547
TBC1D15	0.79245925	0.42809295989966323	0.9999789744458218	0.5839421
DDX54	0.79191023	0.4284130218293368	0.9999789744458218	0.7173606
PLEKHO1	0.79190147	0.4284181439515461	0.9999789744458218	0.277189
UTP4	0.7913393	0.4287460338756871	0.9999789744458218	1.405638
AC092683.1	0.79066294	0.4291407198001964	0.9999789744458218	1.2086697
SLC9B2	0.78988993	0.4295920479424742	0.9999789744458218	1.8554091
ZNF726	0.78974503	0.42967670265997593	0.9999789744458218	2.35545
COP1	0.7895825	0.4297716300785718	0.9999789744458218	0.9513448
USE1	0.78751826	0.43097852463512176	0.9999789744458218	0.61817896
SAP30BP	0.7865565	0.4315415568771436	0.9999789744458218	0.42670685
GOLGA8A	0.7859021	0.43192486806878116	0.9999789744458218	1.1124189
CASC3	0.7855507	0.43213075409680934	0.9999789744458218	0.78510815
SMARCA4	0.78460205	0.43268693023003435	0.9999789744458218	0.8191341
MCFD2	0.78383785	0.4331352621816654	0.9999789744458218	0.4896192
ARIH1	0.78374565	0.4331893893794616	0.9999789744458218	0.9844424
PSMG2	0.7835919	0.43327961007069504	0.9999789744458218	0.38147476
TRAF5	0.78334594	0.43342398578159935	0.9999789744458218	1.8252522
AC015883.1	0.7818878	0.43428049872595564	0.9999789744458218	3.2798145
RNF4	0.78099185	0.43480727448589596	0.9999789744458218	0.987546
TBC1D7	0.78073275	0.43495969504902754	0.9999789744458218	0.9839901
AP1AR	0.7804824	0.4351069781019338	0.9999789744458218	1.3103786
MRPL19	0.7804297	0.4351379887278066	0.9999789744458218	1.3098699
KDM4B	0.77953815	0.4356627784220716	0.9999789744458218	1.0266747
RNU5A-1	0.77828646	0.43640016779238244	0.9999789744458218	0.816637
THOC1	0.77712697	0.4370838644366314	0.9999789744458218	0.6450322
RAB3GAP1	0.7766702	0.43735336871958597	0.9999789744458218	1.5838497
ZNF669	0.7758797	0.4378200444035808	0.9999789744458218	1.5029203
ORMDL1	0.7748783	0.4384115779686931	0.9999789744458218	0.32417858
SEPHS1P6	0.7742371	0.43879060817640725	0.9999789744458218	3.171759
HERC2P9	0.7734641	0.43924777150364525	0.9999789744458218	1.7778344
SFSWAP	0.7733016	0.43934391448732524	0.9999789744458218	0.5598767
TOMM20	0.7726472	0.4397312071680859	0.9999789744458218	0.37988406
SNORD3A	0.77211577	0.44004586413766444	0.9999789744458218	0.87519
NGDN	0.7716722	0.4403086105758357	0.9999789744458218	0.790835
LSM2	0.77082455	0.44081094056602854	0.9999789744458218	0.26293814
MYLK	0.77071476	0.4408760332395478	0.9999789744458218	1.4438452
ZNF675	0.7701965	0.4411833450147551	0.9999789744458218	1.4727763
MAN1A2	0.7693137	0.441707099236171	0.9999789744458218	0.6512857
FBXO34	0.7688877	0.4419599835494459	0.9999789744458218	0.7240087
AC004475.1	0.7685627	0.44215296131451187	0.9999789744458218	1.2841754
COQ10B	0.7684792	0.4422025174379989	0.9999789744458218	0.6570641
CLUHP3	0.7677853	0.44261473881135693	0.9999789744458218	2.2000523
CCDC28A	0.7672802	0.4429149114986629	0.9999789744458218	1.122238
RRP7A	0.7665512	0.44334840942711884	0.9999789744458218	3.062389
ZNF131	0.7662262	0.4435417335899908	0.9999789744458218	0.568973
ABRACL	0.76580894	0.4437899905974252	0.9999789744458218	0.2695973
MGA	0.7651897	0.4441586025155715	0.9999789744458218	1.0949651
INTS6	0.7648998	0.4443312042972791	0.9999789744458218	0.584656
VPS37B	0.7646583	0.444475068352317	0.9999789744458218	1.4510287
HDAC1	0.76414	0.4447838118094949	0.9999789744458218	0.5346568
MRFAP1	0.76347685	0.4451790771445723	0.9999789744458218	0.23142695
ENTR1	0.762941	0.44549857680383564	0.9999789744458218	0.9963899
ELP5	0.7627565	0.4456085987197623	0.9999789744458218	0.5304101
EXOC6	0.7614302	0.446400164458162	0.9999789744458218	1.04475
AC068587.4	0.76107883	0.4466099847717858	0.9999789744458218	2.1440098
AKNA	0.7603937	0.4470192957750764	0.9999789744458218	0.7067336
SLC43A2	0.76020044	0.4471347810364581	0.9999789744458218	0.67816687
WDR54	0.7598227	0.4473605512168555	0.9999789744458218	0.9717013
PIGL	0.759019	0.4478411848031244	0.9999789744458218	1.5159327
CWC15	0.7585315	0.44813285956301585	0.9999789744458218	0.28232962
XPO1	0.7582153	0.4483221116856031	0.9999789744458218	0.28847048
ZNF821	0.7577805	0.44858240745116995	0.9999789744458218	2.2284307
NCBP2	0.75756526	0.44871127244461784	0.9999789744458218	0.59608
AP005273.2	0.75747305	0.44876650673097906	0.9999789744458218	7.132595
TTC21B	0.75736326	0.44883226686525435	0.9999789744458218	1.7960263
PQBP1	0.75726223	0.44889277101871816	0.9999789744458218	0.47459704
HMHB1	0.75588757	0.44971661359518034	0.9999789744458218	2.109357
PDCL3	0.7557558	0.4497956211335059	0.9999789744458218	0.74521285
TFPT	0.75494766	0.4502803727906689	0.9999789744458218	0.9742796
AL139415.1	0.75485986	0.45033308101593517	0.9999789744458218	1.0873921
SMC3	0.75391996	0.4508972777593949	0.9999789744458218	0.54993254
AL603766.1	0.7531821	0.45134047879528805	0.9999789744458218	0.9802597
DDX19B	0.75214565	0.45196348683536236	0.9999789744458218	1.2423824
MPP6	0.75130236	0.45247069929361394	0.9999789744458218	1.2135444
ABLIM1	0.75075775	0.4527984448507292	0.9999789744458218	1.6317896
LETMD1	0.7504108	0.45300732038671243	0.9999789744458218	0.63057125
MYB-AS1	0.7499277	0.4532982503316556	0.9999789744458218	2.1600776
METTL16	0.74990577	0.4533114769251717	0.9999789744458218	1.136922
PLIN3	0.7496642	0.45345698382891364	0.9999789744458218	0.7916046
TRUB1	0.7496598	0.4534596296529093	0.9999789744458218	1.7586025
SLC50A1	0.74903613	0.45383542509527386	0.9999789744458218	0.7774313
SPICE1	0.74825436	0.4543067406206944	0.9999789744458218	1.6746264
EPS15	0.7478503	0.45455045001649674	0.9999789744458218	0.76181465
RNVU1-6	0.74776685	0.4546007904816354	0.9999789744458218	1.6981761
PLP2	0.7475341	0.45474123048657145	0.9999789744458218	0.54453003
ZNF493	0.7469939	0.45506725145805704	0.9999789744458218	1.3948318
FAM193B	0.74623406	0.4555260239643605	0.9999789744458218	1.4055847
NSUN5	0.74597937	0.45567989033290934	0.9999789744458218	0.9545084
MFF	0.7456631	0.45587093753934016	0.9999789744458218	0.47826022
RGS17	0.74561924	0.45589747543697456	0.9999789744458218	2.7868521
RSRP1	0.7442445	0.45672855081925545	0.9999789744458218	0.22997275
ZNF451	0.7441655	0.45677637016627504	0.9999789744458218	0.8348771
LINC02210	0.7437087	0.45705271480759446	0.9999789744458218	2.0541608
CEPT1	0.7432388	0.45733712891981204	0.9999789744458218	1.0724684
UBE2L5	0.7431026	0.4574195478339109	0.9999789744458218	0.24344721
DDX3Y	0.74304116	0.4574567720124255	0.9999789744458218	0.48600438
ZNF280D	0.7429138	0.4575338846494664	0.9999789744458218	0.57828534
ZNF76	0.7426327	0.45770409008259805	0.9999789744458218	1.6419017
SPDYE3	0.74257123	0.45774132725784944	0.9999789744458218	2.043638
AL357060.1	0.7421935	0.4579701072045177	0.9999789744458218	1.6157376
TRIM13	0.7420003	0.45808718221459677	0.9999789744458218	1.2086892
LINC01881	0.7412888	0.45851837579571497	0.9999789744458218	1.452712
OLMALINC	0.7406124	0.45892848677620357	0.9999789744458218	1.6453127
SAFB2	0.7384999	0.4602107406382774	0.9999789744458218	0.6438559
ZFP30	0.7373404	0.46091536518501286	0.9999789744458218	2.7868056
NKAPD1	0.7368002	0.4612438619953747	0.9999789744458218	0.68595284
PRKD2	0.7366509	0.4613346890646265	0.9999789744458218	1.767459
TSN	0.73648834	0.46143354163995276	0.9999789744458218	0.54912883
GKAP1	0.7346218	0.46256985857806987	0.9999789744458218	1.1646136
FIRRE	0.7344505	0.4626742105006928	0.9999789744458218	1.9547949
SIRT1	0.7343978	0.46270632142585433	0.9999789744458218	1.0514759
USP47	0.734389	0.4627116733675515	0.9999789744458218	0.6508176
ADNP	0.733313	0.46336754732198704	0.9999789744458218	0.6154837
PKN2	0.73295283	0.46358717997496146	0.9999789744458218	1.1784877
ING4	0.73284745	0.4636514736720633	0.9999789744458218	0.7157606
PDE9A	0.7322194	0.4640346598987303	0.9999789744458218	4.6467137
WDR33	0.73213595	0.4640855860206218	0.9999789744458218	0.9383401
ZNF720P1	0.73165286	0.4643804826085628	0.9999789744458218	1.5992728
NINJ1	0.731565	0.46443411137198465	0.9999789744458218	0.38441417
CNOT4	0.73131025	0.46458965427394283	0.9999789744458218	0.45022956
UFM1	0.731139	0.46469425976089374	0.9999789744458218	0.67208964
ME3	0.7305988	0.4650242551818752	0.9999789744458218	1.5974549
MRPS30	0.730366	0.46516648849230935	0.9999789744458218	0.8381863
TRIM59	0.7301288	0.4653114303218516	0.9999789744458218	1.2131335
PRKCE	0.72989166	0.4654563972518	0.9999789744458218	1.6744653
SMIM4	0.7289694	0.4660203960726129	0.9999789744458218	0.78972965
AC025370.1	0.72892547	0.46604726262266427	0.9999789744458218	4.4998116
EAF2	0.72831935	0.4664181088380499	0.9999789744458218	0.57233703
OGA	0.72692275	0.4672732907789531	0.9999789744458218	0.42934525
DNAJB14	0.7267295	0.4673916862690022	0.9999789744458218	0.4098959
SLC35D2	0.72669435	0.46741321450830864	0.9999789744458218	1.2015866
FOXK2	0.72664607	0.467442816734881	0.9999789744458218	0.9284173
MATK	0.72647035	0.46755046995519367	0.9999789744458218	0.7381941
PAICS	0.7261761	0.4677308198804645	0.9999789744458218	0.5516027
PSPC1P1	0.72610146	0.46777658643988684	0.9999789744458218	1.9476542
HLA-DOA	0.7250869	0.4683987190901794	0.9999789744458218	1.2133865
AP001011.1	0.7236595	0.4692747890591257	0.9999789744458218	2.5572774
VPS4A	0.7233916	0.4694393215943282	0.9999789744458218	0.7507761
MBD3	0.7231237	0.46960388601944225	0.9999789744458218	0.7192019
PCF11	0.72292167	0.46972800487061617	0.9999789744458218	0.91219586
BISPR	0.7217271	0.47046229548445506	0.9999789744458218	1.5560895
FZR1	0.7207608	0.4710566703453929	0.9999789744458218	1.5593051
AOX2P	0.7201416	0.47143782835115433	0.9999789744458218	4.168445
ATP6V1H	0.72004056	0.4715000191918438	0.9999789744458218	0.8472667
KDM4C	0.71982974	0.4716298233433154	0.9999789744458218	1.1475827
CHPT1	0.71836287	0.47253358918307053	0.9999789744458218	0.5182228
SART1	0.71758544	0.4730129173004344	0.9999789744458218	0.7809797
SPTBN1	0.716852	0.47346540995538255	0.9999789744458218	0.78248274
BCLAF1	0.7166456	0.4735928011045045	0.9999789744458218	0.14664651
TAPT1	0.71633375	0.473785278791495	0.9999789744458218	1.1910753
HUS1	0.71624595	0.4738395056208231	0.9999789744458218	0.86395
SMAD1	0.7161581	0.47389373586189343	0.9999789744458218	0.9390939
POU2AF1	0.71455944	0.4748813221088407	0.9999789744458218	2.422904
PIAS1	0.71448916	0.4749247584017603	0.9999789744458218	0.6377988
ZNF195	0.7144628	0.47494104757387356	0.9999789744458218	1.0064237
SAFB	0.7143135	0.47503335867526	0.9999789744458218	0.34010655
TPR	0.7135932	0.4754787622697787	0.9999789744458218	0.27096024
AL121985.1	0.71303105	0.47582655345699665	0.9999789744458218	1.5290467
SKP1	0.71275437	0.47599778313934404	0.9999789744458218	0.1206546
AC005785.2	0.71274996	0.4760005013431142	0.9999789744458218	2.4664547
TERF1	0.7127148	0.4760222472795955	0.9999789744458218	0.74257815
MCUB	0.711876	0.47654159318759237	0.9999789744458218	0.39501247
CPSF6	0.7113577	0.47686260067778563	0.9999789744458218	0.55138284
AC015971.1	0.7097898	0.47783450493795177	0.9999789744458218	1.1179596
DIPK1A	0.70762897	0.47917570925062913	0.9999789744458218	1.5131369
PUF60	0.70739615	0.4793203110845229	0.9999789744458218	0.28433907
STX16	0.7065485	0.4798470812379637	0.9999789744458218	0.758589
ATAD3B	0.70644313	0.47991260840003025	0.9999789744458218	1.5041997
SELENOH	0.70614886	0.48009556421830646	0.9999789744458218	0.2789639
EXOC7	0.7061313	0.4801064881565048	0.9999789744458218	0.6542827
AP000345.2	0.705837	0.4802894842649782	0.9999789744458218	3.7369955
BLOC1S4	0.7056877	0.48038236250159927	0.9999789744458218	0.7672398
HAUS3	0.70539343	0.48056541590891555	0.9999789744458218	0.9820899
RBFA	0.7050728	0.4807649054154226	0.9999789744458218	0.7195691
SLC66A2	0.7050465	0.48078130381914475	0.9999789744458218	0.46814975
SNHG12	0.70407146	0.4813882588920463	0.9999789744458218	0.63579637
WDR18	0.7040056	0.4814292844058431	0.9999789744458218	0.78067845
PSMB1	0.70393974	0.48147031182241573	0.9999789744458218	0.12227467
CAPN7	0.70358837	0.48168915684286284	0.9999789744458218	0.6254105
DDHD1	0.70356643	0.4817028364533108	0.9999789744458218	0.77684116
TRMT1	0.7029252	0.48210237425432	0.9999789744458218	0.50177336
AC105250.1	0.7028066	0.48217628111987254	0.9999789744458218	0.40163594
PHF11	0.7027671	0.48220091811056864	0.9999789744458218	0.40173966
SUN1	0.7007863	0.48343638112149556	0.9999789744458218	0.92617756
NUB1	0.7002461	0.4837736235231014	0.9999789744458218	0.31693554
IQCB1	0.7000748	0.4838805806856109	0.9999789744458218	0.97585136
AL035530.2	0.69978935	0.48405887112520707	0.9999789744458218	1.8094566
SDE2	0.6995917	0.4841823238352926	0.9999789744458218	1.7907736
ZNF326	0.6988802	0.48462689491691757	0.9999789744458218	1.3342942
MYO18A	0.6982829	0.4850002858222604	0.9999789744458218	1.2182236
SPINT2	0.6975187	0.48547823366501996	0.9999789744458218	1.0290349
BEND5	0.69601226	0.4864211413814028	0.9999789744458218	1.3492485
AC095055.1	0.6959859	0.48643764419998337	0.9999789744458218	3.5226672
WIPF1	0.69590247	0.48648990512224377	0.9999789744458218	0.46070808
ADGRG6	0.69586295	0.4865146613552386	0.9999789744458218	3.4683158
NPDC1	0.6954545	0.48677051563240736	0.9999789744458218	1.0491073
GTPBP4	0.69504607	0.4870264425974842	0.9999789744458218	0.6520552
BANF1	0.6949363	0.4870952525620891	0.9999789744458218	0.4284241
ZNF207	0.6943697	0.48745039541674495	0.9999789744458218	0.31626192
SEM1	0.6935704	0.4879516873183196	0.9999789744458218	0.14558208
VPS51	0.69324094	0.48815834454265306	0.9999789744458218	1.779285
EPHB6	0.69296867	0.48832921681569386	0.9999789744458218	0.854614
COPS2	0.6926261	0.4885442309602668	0.9999789744458218	0.38087714
GNL3	0.6914403	0.4892889046043344	0.9999789744458218	0.40866804
WDR45B	0.6908957	0.48963110758520323	0.9999789744458218	0.6939366
PITHD1	0.6908605	0.48965318961972126	0.9999789744458218	0.4994256
AKT2	0.6905048	0.4898768004055801	0.9999789744458218	0.7484443
CDIPT	0.6902193	0.49005628089051156	0.9999789744458218	0.6172838
DNAJC4	0.69020176	0.49006732699874	0.9999789744458218	0.39645857
DESI2	0.689947	0.4902275106184443	0.9999789744458218	0.61552215
PTEN	0.6893585	0.4905976976719957	0.9999789744458218	0.51853573
PDCD2	0.6887612	0.4909735635005973	0.9999789744458218	0.46444094
RSRC1	0.68819463	0.49133022622181655	0.9999789744458218	0.41652247
APOLD1	0.6881683	0.49134681857118856	0.9999789744458218	1.7829026
TASOR2	0.6875095	0.49176172508033433	0.9999789744458218	0.64586794
ZNF564	0.68742603	0.4918142933190749	0.9999789744458218	2.2435472
GBP7	0.68610406	0.4926474870639127	0.9999789744458218	3.32394
LY9	0.68541455	0.49308237656626364	0.9999789744458218	1.8822305
SLC8A1-AS1	0.6851993	0.49321814851052626	0.9999789744458218	1.7109941
LSM3P3	0.68469864	0.4935341035679801	0.9999789744458218	1.2192168
H2AC6	0.6830297	0.4945880692601169	0.9999789744458218	0.71214086
XRN2	0.68260807	0.4948545245492657	0.9999789744458218	0.8159832
ZNF595	0.6817209	0.4954154413408892	0.9999789744458218	1.4888463
EIF5A	0.68131244	0.49567379930633004	0.9999789744458218	0.3749233
LRPPRC	0.6812686	0.49570158401475983	0.9999789744458218	0.64269996
SYAP1	0.6807064	0.4960573016980028	0.9999789744458218	0.5055412
CDK11A	0.68060976	0.49611845438778257	0.9999789744458218	0.46775022
ICE2	0.6801969	0.4963797884514326	0.9999789744458218	0.934277
STAP1	0.6797577	0.4966578839855994	0.9999789744458218	3.2891665
C16orf91	0.67947227	0.49683869061294605	0.9999789744458218	0.8992764
LRRC37B	0.6789672	0.4971586651797161	0.9999789744458218	1.1963441
CHRAC1	0.67892325	0.4971864942422517	0.9999789744458218	0.6809272
FBXO33	0.67776376	0.4979214815323949	0.9999789744458218	1.3928937
MAPKAPK2	0.67767596	0.49797718593945317	0.9999789744458218	0.34044355
RAF1	0.6767097	0.4985901532199889	0.9999789744458218	0.6843884
DPM1	0.67647696	0.49873788254919005	0.9999789744458218	0.6420879
RBM4B	0.676354	0.49881593762458276	0.9999789744458218	1.1119311
EP300	0.6763276	0.4988326645568675	0.9999789744458218	0.64051723
MARF1	0.67609924	0.4989776437903899	0.9999789744458218	1.0372587
IGHD	0.67598945	0.49904735331421146	0.9999789744458218	1.571293
NF2	0.6756996	0.49923141131695925	0.9999789744458218	1.3919616
HSPA14-1	0.6751725	0.4995661545943899	0.9999789744458218	0.7492091
TRIP4	0.67387253	0.5003923639433863	0.9999789744458218	1.043547
METTL3	0.6736705	0.5005208263709315	0.9999789744458218	1.1883271
IMPACT	0.67310834	0.5008783790496063	0.9999789744458218	0.74853057
RAN	0.6729546	0.5009761709229886	0.9999789744458218	0.075335346
COX20	0.6722431	0.501428939354394	0.9999789744458218	0.38434452
UQCRC2	0.67140865	0.5019602400516242	0.9999789744458218	0.26500812
IKBKB	0.67112756	0.5021392715473074	0.9999789744458218	0.908481
UIMC1	0.6708509	0.5023155386646645	0.9999789744458218	0.61948
AC131206.1	0.670315	0.502656974366577	0.9999789744458218	0.62836343
TPGS1	0.6701745	0.5027465515791902	0.9999789744458218	0.41069397
RBM34	0.67015696	0.5027577493240464	0.9999789744458218	0.39312384
SPRTN	0.6700867	0.5028025416217861	0.9999789744458218	0.908481
FKBP5	0.6698803	0.5029341311939549	0.9999789744458218	0.74458843
POLDIP2	0.66987586	0.5029369311698025	0.9999789744458218	1.4591031
CDK11B	0.6691424	0.503404642671505	0.9999789744458218	0.62625545
C11orf58	0.6690897	0.50343825952719	0.9999789744458218	0.16890664
STAG3L2	0.6681454	0.5040407623655572	0.9999789744458218	1.3737136
SLC35D1	0.66762716	0.5043715999757384	0.9999789744458218	2.0927951
PTPRD	0.6676052	0.5043856210472752	0.9999789744458218	3.0604634
ABHD14B	0.66716164	0.5046688907008441	0.9999789744458218	0.5719339
PBX2	0.6665336	0.5050700990409197	0.9999789744458218	1.0241762
UCKL1	0.66632277	0.5052048080333842	0.9999789744458218	0.9153567
HACL1	0.66598463	0.5054209432347179	0.9999789744458218	1.1674385
CRBN	0.6652995	0.5058589767537385	0.9999789744458218	0.6087669
NCAPH2	0.6649305	0.5060949236845533	0.9999789744458218	1.019404
GRSF1	0.6645001	0.5063702682650211	0.9999789744458218	0.5387911
KLHDC4	0.6643552	0.5064630040657907	0.9999789744458218	1.1443639
CBX2	0.6642981	0.5064995388027858	0.9999789744458218	2.059174
NSRP1	0.66424537	0.5065332644053308	0.9999789744458218	0.27315933
H2BC15	0.6641312	0.5066063405945063	0.9999789744458218	1.0664909
ZBTB14	0.66355586	0.5069746164603666	0.9999789744458218	1.6346148
USP7	0.66252816	0.507632802638218	0.9999789744458218	0.7900304
MGAT4A	0.66241395	0.5077059621159989	0.9999789744458218	0.70432407
PNPLA2	0.66187376	0.5080521377305649	0.9999789744458218	0.33241978
WWP1	0.6600291	0.5092351335409171	0.9999789744458218	0.8014872
RFK	0.6599984	0.5092548623540041	0.9999789744458218	0.66072685
THUMPD1	0.65941864	0.5096269663379212	0.9999789744458218	0.46005055
DUSP10	0.6585315	0.5101966736279235	0.9999789744458218	2.1194742
LINC02190	0.6575565	0.5108231715861369	0.9999789744458218	2.8677368
ZNF800	0.6574115	0.5109163339711811	0.9999789744458218	0.50366837
ZNF263	0.6559358	0.5118654015748674	0.9999789744458218	1.3265954
SLMAP	0.6556372	0.5120575866452655	0.9999789744458218	0.792748
CYTH1	0.6550311	0.5124477249660768	0.9999789744458218	0.5528715
GNPDA2	0.6548115	0.5125891176677209	0.9999789744458218	1.5980616
AL009031.1	0.65475005	0.5126287112680156	0.9999789744458218	1.3151176
DDB2	0.6547017	0.5126598216436473	0.9999789744458218	1.1981177
ZNF10	0.654346	0.5128889374355695	0.9999789744458218	1.9905183
PSMD6	0.6543108	0.5129115690502669	0.9999789744458218	0.33416298
AKAP8	0.6540693	0.5130671754850484	0.9999789744458218	0.7304167
TSC1	0.6534149	0.5134888509760576	0.9999789744458218	1.1885549
ODF2L	0.65336215	0.5135228192667312	0.9999789744458218	0.4185243
NUP107	0.65278244	0.5138965476520929	0.9999789744458218	0.84564716
SNORD3B-2	0.65218073	0.514284582014787	0.9999789744458218	0.4114305
MACROD1	0.65151757	0.5147124459613825	0.9999789744458218	1.19287
ALG13	0.6513726	0.5148059772765067	0.9999789744458218	0.45605138
ZNF100	0.6504679	0.5153900389917045	0.9999789744458218	1.121488
TAF10	0.65039325	0.5154382536208937	0.9999789744458218	0.77580017
LYRM4	0.6503844	0.515443926084144	0.9999789744458218	0.65177065
KPNB1	0.65027905	0.5155119981707663	0.9999789744458218	0.8854111
YBX1P2	0.6495588	0.5159772822887542	0.9999789744458218	0.98443943
H2BC8	0.6493128	0.5161362096685438	0.9999789744458218	1.4893287
AAMP	0.6482104	0.5168488566534446	0.9999789744458218	0.47061628
AL355075.4	0.6481753	0.5168715788812206	0.9999789744458218	1.4167689
MCTP2	0.64743304	0.5173517068503666	0.9999789744458218	1.3588337
NAT9	0.6473101	0.5174312769690745	0.9999789744458218	0.97825664
RB1	0.6469631	0.517655812520619	0.9999789744458218	0.39488298
NEPRO	0.6464932	0.5179600106628125	0.9999789744458218	0.7067521
AL135925.1	0.6455445	0.5185743744873121	0.9999789744458218	1.3632798
PRH1	0.64552695	0.5185857551454451	0.9999789744458218	0.7185169
DCAF17	0.6448901	0.5189983911239202	0.9999789744458218	1.5521328
CEP83	0.6447188	0.5191094049029814	0.9999789744458218	0.85771006
SURF2	0.6439854	0.5195849102232846	0.9999789744458218	0.6470912
VPS13A	0.64377016	0.5197244723829488	0.9999789744458218	1.280416
SRP19	0.64356816	0.5198555075177236	0.9999789744458218	0.4052379
ZNF337	0.6434364	0.519940974393899	0.9999789744458218	1.9284679
AC112777.1	0.64298844	0.5202316159678858	0.9999789744458218	5.908101
DDIT4-AS1	0.64209247	0.5208131502708389	0.9999789744458218	2.0098102
SRPRA	0.641785	0.521012773484661	0.9999789744458218	0.3285563
SKIL	0.64165324	0.5210983383497192	0.9999789744458218	0.73514515
SH3RF1	0.6413546	0.5212923121585029	0.9999789744458218	1.2657411
AC139887.2	0.64131945	0.521315135049681	0.9999789744458218	1.5190467
RNF10	0.6411394	0.5214321104383305	0.9999789744458218	0.5176601
SUPV3L1	0.6404762	0.5218630386825303	0.9999789744458218	1.2724676
TXN	0.64031374	0.5219686583018137	0.9999789744458218	0.0718027
AP000769.2	0.64017755	0.5220571588769853	0.9999789744458218	1.9119492
FBRS	0.63991404	0.5222284722259896	0.9999789744458218	0.6300841
SSBP3	0.63954514	0.5224683594492633	0.9999789744458218	0.4398669
DNAJC7	0.6394397	0.5225369090538372	0.9999789744458218	0.3838532
TMEM161B	0.63937825	0.5225768984569619	0.9999789744458218	1.2689692
PA2G4P6	0.63914984	0.5227254442893836	0.9999789744458218	1.0792503
AL138720.1	0.6391367	0.5227340149029074	0.9999789744458218	2.685414
TBL1XR1	0.6390357	0.5227997253376608	0.9999789744458218	0.3743943
UBAP1	0.6384867	0.5231569214280103	0.9999789744458218	1.0923634
DYRK2	0.6384164	0.5232026515693597	0.9999789744458218	1.5988551
PSMA5	0.6382144	0.5233341371533204	0.9999789744458218	0.23895116
ABCD4	0.6381924	0.5233484300862782	0.9999789744458218	0.76770586
ADAL	0.63789815	0.5235399747121722	0.9999789744458218	1.3417152
PLA2G6	0.63775325	0.523634330805056	0.9999789744458218	1.9868485
MPRIP	0.63756436	0.5237572927400855	0.9999789744458218	0.5761139
RNF6	0.63726133	0.5239546346928201	0.9999789744458218	0.91211987
CASK	0.6357549	0.5249361898375832	0.9999789744458218	1.336814
TSC22D2	0.63522345	0.5252826772124306	0.9999789744458218	0.63073593
AL158050.1	0.6349863	0.525437345698906	0.9999789744458218	1.2550583
EPM2A	0.63475794	0.525586307739085	0.9999789744458218	1.8861312
DANCR	0.63452953	0.5257352913753328	0.9999789744458218	0.33928117
MED27	0.63430995	0.5258785652335201	0.9999789744458218	0.8518244
PHF10	0.6329001	0.5267988585974387	0.9999789744458218	0.68633944
S100PBP	0.6318856	0.5274616341565035	0.9999789744458218	0.8407626
SYNE3	0.63180655	0.5275132968602214	0.9999789744458218	0.9915117
TCF7L2	0.6310731	0.5279927349500053	0.9999789744458218	0.51401144
EXOSC10	0.6299795	0.5287079979140082	0.9999789744458218	0.69558305
ZDHHC4	0.62967205	0.5289091646461355	0.9999789744458218	1.2458799
FAM107B	0.6295403	0.5289953908829266	0.9999789744458218	0.37481564
AIMP2	0.6293998	0.5290873734191355	0.9999789744458218	1.4796536
AAMDC	0.62920654	0.5292138626921786	0.9999789744458218	0.31691226
CRMP1	0.6287893	0.5294870169827363	0.9999789744458218	4.8053493
MAPK8	0.6274409	0.5303702265373762	0.9999789744458218	0.9341613
AL117332.1	0.62729603	0.5304652088834323	0.9999789744458218	2.6013284
ZFP14	0.62598723	0.531323319207454	0.9999789744458218	1.4584697
STK39	0.6259389	0.5313550078863267	0.9999789744458218	1.8298769
PRKCI	0.6259389	0.5313550078863267	0.9999789744458218	1.8298769
AL031772.1	0.6259038	0.5313780548001303	0.9999789744458218	1.826122
WDR82	0.62437975	0.5323782022253973	0.9999789744458218	0.48214626
RPP30	0.6243095	0.5324243415078088	0.9999789744458218	0.5028012
MFAP4	0.62426996	0.5324502957437214	0.9999789744458218	4.413583
MAGOH	0.623822	0.5327444885050553	0.9999789744458218	0.21818402
UHMK1	0.6237781	0.5327733353590773	0.9999789744458218	0.6185711
PRCD	0.6234575	0.5329839413333415	0.9999789744458218	2.4501371
PRDM8	0.62342674	0.5330041386391116	0.9999789744458218	2.4435558
PYCR2	0.6226362	0.5335236308586015	0.9999789744458218	0.5248936
AC007383.2	0.62260985	0.5335409516719422	0.9999789744458218	1.8070161
SETD2	0.6223375	0.5337199500488358	0.9999789744458218	0.5612742
ALG11	0.6222058	0.5338065730578803	0.9999789744458218	0.63371414
BAALC-AS1	0.62210035	0.5338758765783862	0.9999789744458218	4.342846
NBEAL2	0.622074	0.5338932031686277	0.9999789744458218	0.80385983
IRF2BP1	0.6218544	0.5340376024655981	0.9999789744458218	1.2160738
RNF19A	0.6216787	0.5341531361018672	0.9999789744458218	0.2950519
PPP6R1	0.6213581	0.5343640175151261	0.9999789744458218	0.429256
SZRD1	0.62127906	0.5344160221294816	0.9999789744458218	0.57286054
SNRPD3	0.6212088	0.5344622505976903	0.9999789744458218	0.7771207
SNX11	0.6205764	0.5348783976071516	0.9999789744458218	1.4398139
MILR1	0.6202733	0.5350778592809529	0.9999789744458218	1.1898572
TRAF4	0.62014157	0.5351645934439337	0.9999789744458218	1.4137632
NELFCD	0.61912704	0.535832683816089	0.9999789744458218	0.727745
PRKCQ-AS1	0.6180334	0.5365533032830752	0.9999789744458218	0.9796518
RABGGTB	0.61693543	0.5372773069568473	0.9999789744458218	0.6792485
CTPS1	0.61545974	0.5382511405671988	0.9999789744458218	1.2644129
RNF139	0.61544216	0.5382627391568358	0.9999789744458218	0.6702995
CGGBP1	0.615227	0.5384048320565205	0.9999789744458218	0.28148246
HOXA9	0.61469555	0.5387557951081592	0.9999789744458218	1.1856635
STK33	0.61464286	0.5387906076120229	0.9999789744458218	2.3564293
TPTEP2-CSNK1E	0.6144408	0.538924065990076	0.9999789744458218	4.059584
INTS8	0.6140895	0.5391562069773722	0.9999789744458218	1.023837
ANKRD36	0.6140104	0.5392084456035816	0.9999789744458218	0.74427515
FBXW11	0.61360633	0.539475482623625	0.9999789744458218	0.6542814
BUD23	0.6130617	0.539835506848495	0.9999789744458218	0.38021845
KXD1	0.6118979	0.5406053163764271	0.9999789744458218	0.46971935
RAB2B	0.61108977	0.5411401482703958	0.9999789744458218	1.1528733
ANAPC16	0.61082184	0.5413175149895494	0.9999789744458218	0.24740402
VPS13C	0.61055833	0.5414920023751291	0.9999789744458218	0.5588819
LMF1	0.60892457	0.5425744505252452	0.9999789744458218	1.2274283
ABCD3	0.6087445	0.5426938185572605	0.9999789744458218	1.0162551
RWDD4P2	0.608459	0.5428830873751499	0.9999789744458218	1.391838
ZNF333	0.60766846	0.5434073879723562	0.9999789744458218	1.1767409
SDHD	0.6076597	0.5434132149500928	0.9999789744458218	0.47202623
SCMH1	0.6073083	0.5436463195603363	0.9999789744458218	1.7280294
NSD2	0.60714144	0.5437570616777359	0.9999789744458218	0.6754685
CDK7	0.6066144	0.5441068472907462	0.9999789744458218	1.17538
TIMM44	0.60646504	0.5442059735513709	0.9999789744458218	0.59424424
AL162253.2	0.6064563	0.544211804787464	0.9999789744458218	2.3853793
AC083862.3	0.60603464	0.5444917406451184	0.9999789744458218	1.7047004
SSBP4	0.6048752	0.5452619330284347	0.9999789744458218	0.35047895
UBE2Q2P2	0.6036937	0.5460472681849562	0.9999789744458218	2.2560866
RAB5IF	0.6034434	0.5462137494604435	0.9999789744458218	0.8880031
ACTR1B	0.6033907	0.5462488013551563	0.9999789744458218	0.8848305
SMG1P1	0.6033029	0.5463072236567377	0.9999789744458218	1.0045049
PRPS2	0.6031667	0.5463977843427061	0.9999789744458218	0.7875207
MAN1A1	0.6029691	0.5465292566365239	0.9999789744458218	1.3691366
FAM136A	0.60289884	0.5465760061170453	0.9999789744458218	0.39897567
TIPRL	0.6013529	0.5476049955310998	0.9999789744458218	0.8861412
AC007381.1	0.6011289	0.5477541614807758	0.9999789744458218	2.1736195
SPPL3	0.60108936	0.5477804869688447	0.9999789744458218	0.8795993
SERBP1P5	0.6010498	0.5478068130824023	0.9999789744458218	2.3477757
SBF1	0.6008522	0.5479384530315963	0.9999789744458218	1.3674111
AL645998.1	0.59979373	0.5486437240705186	0.9999789744458218	1.3656877
PWP1	0.5996883	0.5487139830614878	0.9999789744458218	0.3716578
G2E3	0.5992667	0.5489950634332088	0.9999789744458218	0.8841571
CYC1	0.598419	0.5495603670037036	0.9999789744458218	0.16202451
AL356599.1	0.598419	0.5495603670037036	0.9999789744458218	1.3446968
AC242376.2	0.59773827	0.5500145749644866	0.9999789744458218	2.3134418
WDR48	0.5972376	0.5503487555806033	0.9999789744458218	0.84494376
ETS1	0.5965349	0.5508179495663921	0.9999789744458218	0.75240916
ZNF33B	0.5962582	0.5510027486863258	0.9999789744458218	1.6625957
AL035458.1	0.59606934	0.5511288989272698	0.9999789744458218	2.203643
NKIRAS2	0.59602106	0.5511611722004026	0.9999789744458218	0.68926394
STN1	0.5955204	0.5514956953801369	0.9999789744458218	0.98300683
CDC42SE2	0.59502405	0.5518273825955893	0.9999789744458218	0.5253947
BLK	0.5947781	0.5519917948676688	0.9999789744458218	2.3277633
PRKCH	0.5937636	0.552670249664503	0.9999789744458218	1.2295568
AC139099.2	0.5935264	0.5528289084584457	0.9999789744458218	3.4173772
MKRN2	0.59343857	0.552887676643016	0.9999789744458218	1.1365714
AHSA2P	0.593219	0.5530346105065382	0.9999789744458218	0.6373216
NOL9	0.59317505	0.553063999576451	0.9999789744458218	1.1254128
SLIRP	0.5930433	0.553152171379945	0.9999789744458218	0.14026652
MRPS27	0.59246355	0.5535402091535073	0.9999789744458218	0.6788594
SUCO	0.5924021	0.5535813724952835	0.9999789744458218	0.62279826
KPNA3	0.59218687	0.5537254559986606	0.9999789744458218	0.7690856
SP140L	0.59214735	0.5537519223119227	0.9999789744458218	1.3393059
LENG8	0.5917082	0.554046034134221	0.9999789744458218	0.73319864
STAU1	0.59123385	0.5543637607609638	0.9999789744458218	0.29647297
NNT-AS1	0.5911284	0.5544343787817718	0.9999789744458218	0.9725953
ASDURF	0.59083855	0.5546286010262965	0.9999789744458218	1.6408209
MATR3	0.5907024	0.554719838108727	0.9999789744458218	1.4900161
CDH2	0.5902852	0.5549994813146795	0.9999789744458218	3.3710854
EEF1GP2	0.5902852	0.5549994813146795	0.9999789744458218	3.3710854
RAB5C	0.5897801	0.5553380889308639	0.9999789744458218	0.167369
NBPF15	0.5896703	0.5554117126331264	0.9999789744458218	1.6286275
GPR132	0.5893892	0.5556002110314098	0.9999789744458218	2.1279464
FP565260.3	0.58916086	0.5557533889765164	0.9999789744458218	3.332158
KTI12	0.5890291	0.5558417702442509	0.9999789744458218	0.9704439
SLC12A6	0.5889061	0.5559242656162653	0.9999789744458218	0.9016343
TPGS2	0.58881825	0.5559831945399278	0.9999789744458218	0.3619598
DNAJC1	0.5888051	0.5559920341413698	0.9999789744458218	0.30308354
B3GNT2	0.58865577	0.5560922210836272	0.9999789744458218	1.3153573
CYTH2	0.58833957	0.5563044107375883	0.9999789744458218	0.53592056
AL391069.2	0.5874787	0.5568822381102687	0.9999789744458218	1.3066838
SUPT5H	0.58739525	0.556938267533121	0.9999789744458218	0.3573486
PRKRA	0.5869824	0.557215506130533	0.9999789744458218	0.7643335
SART3	0.5869561	0.5572332044928394	0.9999789744458218	0.82219523
POLR2H	0.5868682	0.5572922010108776	0.9999789744458218	0.38796768
NF1	0.58654326	0.5575105145696945	0.9999789744458218	0.9562434
CCDC107	0.58566487	0.5581007594279657	0.9999789744458218	1.1107273
OSER1	0.5853311	0.5583251321267775	0.9999789744458218	0.48921248
RFNG	0.5852959	0.5583487528562117	0.9999789744458218	0.58093685
GEMIN4	0.5852564	0.558375326757456	0.9999789744458218	1.6952257
PCIF1	0.5849402	0.5585879400964552	0.9999789744458218	0.61884135
COPS4	0.5848479	0.558649959729584	0.9999789744458218	0.49433035
GPATCH2L	0.58479524	0.5586854010220208	0.9999789744458218	0.7202262
KDM2B	0.5845976	0.5588183155967748	0.9999789744458218	1.0695297
RPF2P1	0.58440435	0.5589482913638095	0.9999789744458218	1.4800938
TMCC1	0.5839652	0.5592437454222183	0.9999789744458218	0.9034709
RAC2	0.58364457	0.5594594747420334	0.9999789744458218	0.12908027
TBCB	0.5836138	0.5594801632366366	0.9999789744458218	0.27123076
ZNF639	0.58360064	0.5594890298479583	0.9999789744458218	1.1099589
MBNL3	0.5819888	0.5605742259933459	0.9999789744458218	1.2868924
GAMT	0.58005196	0.5618795825782138	0.9999789744458218	0.6596792
SOX2-OT	0.5792526	0.5624187291013358	0.9999789744458218	3.1081295
AC022966.1	0.57885736	0.5626854322995827	0.9999789744458218	0.6004774
UNKL	0.5787344	0.5627684190764657	0.9999789744458218	1.2774285
GRAP	0.57831717	0.5630500253651887	0.9999789744458218	2.0290303
ZNF876P	0.5782073	0.5631241435795633	0.9999789744458218	3.1203203
ABI1	0.5780975	0.5631982664995754	0.9999789744458218	0.9462609
RPUSD4	0.5767053	0.5641385529982619	0.9999789744458218	1.0786607
Z73417.1	0.57649446	0.5642809966345732	0.9999789744458218	1.5629842
LINC00909	0.57511544	0.5652132422882021	0.9999789744458218	1.5329189
CBX5	0.57426775	0.5657866139030051	0.9999789744458218	0.3922337
TCF7	0.5741492	0.5658668487779481	0.9999789744458218	0.78256726
ZNF251	0.5740789	0.5659143979483812	0.9999789744458218	2.0199926
STARD9	0.5730424	0.5666159709421712	0.9999789744458218	3.154677
CCL28	0.5730117	0.5666367866782587	0.9999789744458218	2.016519
MARCHF6	0.57284915	0.5667468188032927	0.9999789744458218	0.65209854
JAK1	0.5727174	0.5668360415595968	0.9999789744458218	0.4344098
RRN3	0.57242316	0.5670353300237344	0.9999789744458218	1.2700053
ATP5F1D	0.5721157	0.5672435777113889	0.9999789744458218	0.04585457
MACROD2	0.57148767	0.5676691118266868	0.9999789744458218	2.9446542
ZNF138	0.57117146	0.5678834245932276	0.9999789744458218	1.0616286
NAA35	0.571088	0.5679399858073417	0.9999789744458218	1.2525837
PPP2R5C	0.5705566	0.5683002546667366	0.9999789744458218	0.23855965
FCMR	0.56931806	0.5691403134307713	0.9999789744458218	1.9304757
CERK	0.569217	0.5692088550086396	0.9999789744458218	0.92308486
IL16	0.569138	0.5692624989926715	0.9999789744458218	0.5668403
RNU5E-1	0.5686549	0.5695903757762091	0.9999789744458218	1.2300078
LEMD2	0.56811905	0.5699541262998963	0.9999789744458218	0.9205795
SLC7A6OS	0.56752175	0.5703597492208814	0.9999789744458218	1.975313
AC006141.1	0.5672275	0.5705596287294458	0.9999789744458218	2.9248626
AP2A2	0.56595385	0.5714251634414769	0.9999789744458218	0.78303766
FAM98B	0.56590116	0.5714609921249127	0.9999789744458218	1.0553502
MAPKAPK3	0.5654356	0.5717775252308264	0.9999789744458218	0.35981914
PRKAA1	0.5649173	0.5721299902900661	0.9999789744458218	0.7822714
TAF9B	0.564913	0.5721329777232019	0.9999789744458218	1.3091748
RRP8	0.5647285	0.5722584566074729	0.9999789744458218	0.9101781
PTBP2	0.5644869	0.5724227939607229	0.9999789744458218	1.5113356
RBCK1	0.56425416	0.5725811766125879	0.9999789744458218	0.2411793
GPR18	0.5640741	0.5727037133132991	0.9999789744458218	1.9279547
UBL3	0.56312984	0.57334648752653	0.9999789744458218	1.9431711
MYH11	0.5630947	0.573370411306262	0.9999789744458218	2.948754
[truncated: 19,352 more rows]

## Sheet: 3_MSSC
names	scores	pvals	pvals_adj	logfoldchanges
[truncated: 21,269 more rows]

## Sheet: 4_PC
names	scores	pvals	pvals_adj	logfoldchanges
[truncated: 21,269 more rows]

[truncated: 37 more sheets: 5_HAGEP, 6_pre_fb, 7_HSPC, 8_pre_fb, 9_Mk, 10_DC, 11_T, 12_PC, 13_PC, 14_GC, 15_ery., 16_balanced_prog., 17_Nk, 18_GC, 19_GC, 20_DC, 21_DC, 22_PC, 23_OC, 24_DC …]
