# Supplementary material for: Identification of phenotypically, functionally, and anatomically distinct stromal niche populations in human bone marrow based on single-cell RNA sequencing
Source: eLife journal article supplement (doi:10.7554/elife.81656), 2023-03-06
Supplement: supp [file elife-81656-supp-v1.zip › elife_poa_e81656_Supplementary_file_6.xlsx]

## Sheet: means
Supplementary File 6. List of ligand-receptor interactions detected by CellPhoneDB analysis of the scRNAseq dataset.
interacting_pair	0|0	0|1	0|2	0|3	0|4	0|5	0|6	0|7	0|8	0|9	0|10	0|11	0|12	0|13	0|14	0|15	0|16	0|17	0|18	0|19	0|20	0|21	0|22	0|23	0|24	0|25	0|26	0|27	0|28	0|29	0|30	0|31	0|32	0|33	0|34	0|35	0|36	0|37	0|38	0|39	0|40	0|41	1|0	1|1	1|2	1|3	1|4	1|5	1|6
HLA-DPA1_TNFSF9	0.412	0	0	0	0	0.411	0	0.412	0.412	0	0	0	0	0	0	0	0.411	0.412	0.412	0.412	0	0.413	0	0	0	0	0	0.411	0	0	0	0	0.412	0	0	0	0.412	0	0	0.412	0.415	0	0.451	0	0	0	0	0.45	0
PVR_TNFSF9	0	0	0	0	0	0	0	0	0	0	0	0	0	0	0	0	0	0	0	0	0	0	0	0	0	0	0	0	0	0	0	0	0	0	0	0	0	0	0	0	0	0	0	0	0	0	0	0	0
HLA-DPA1_GAL	0	0	0	0	0.413	0.411	0	0.412	0	0	0	0	0	0	0	0	0.411	0	0	0.412	0	0	0	0	0	0	0	0.425	0	0	0	0.413	0	0	0	0	0	0	0	0.414	0	0.425	0	0	0	0	0.451	0.45	0
GALR2_GAL	0	0	0	0	0.002	0	0	0.002	0	0	0	0	0	0	0	0	0.001	0	0	0.002	0	0	0	0	0	0	0	0.015	0	0	0	0.003	0	0	0	0	0	0	0	0.003	0	0.015	0	0	0	0	0	0	0
GALR3_GAL	0	0	0	0	0	0	0	0	0	0	0	0	0	0	0	0	0	0	0	0	0	0	0	0	0	0	0	0	0	0	0	0	0	0	0	0	0	0	0	0	0	0	0	0	0	0	0	0	0
PVR_CD96	0	0	0	0	0	0	0	0	0	0	0	0	0	0	0	0	0	0	0	0	0	0	0	0	0	0	0	0	0	0	0	0	0	0	0	0	0	0	0	0	0	0	0	0	0	0	0	0	0
PVR_CD226	0	0	0	0	0	0	0	0	0	0	0	0	0	0	0	0	0	0	0	0	0	0	0	0	0	0	0	0	0	0	0	0	0	0	0	0	0	0	0	0	0	0	0	0	0	0	0	0	0
PVR_TIGIT	0	0	0	0	0	0	0	0	0	0	0	0	0	0	0	0	0	0	0	0	0	0	0	0	0	0	0	0	0	0	0	0	0	0	0	0	0	0	0	0	0	0	0	0	0	0	0	0	0
PVR_NECTIN3	0	0	0	0	0	0	0	0	0	0	0	0	0	0	0	0	0	0	0	0	0	0	0	0	0	0	0	0	0	0	0	0	0	0	0	0	0	0	0	0	0	0	0	0	0	0	0	0	0
CADM3_NECTIN3	0	0	0	0	0	0	0	0	0	0	0	0	0	0	0	0	0	0	0	0	0	0	0	0	0	0	0	0	0	0	0	0	0	0	0	0	0	0	0	0	0	0	0	0	0	0	0	0	0
CADM1_NECTIN3	0	0	0	0	0	0	0	0	0	0	0	0	0	0	0	0	0	0	0	0	0	0	0	0	0	0	0	0	0	0	0	0	0	0	0	0	0	0	0	0	0	0	0	0	0	0	0	0	0
NECTIN1_NECTIN3	0	0.014	0	0	0	0.02	0.018	0	0.02	0	0	0	0	0	0	0	0.019	0.014	0	0	0	0	0	0	0	0	0	0	0	0.023	0	0	0	0	0	0	0	0	0.022	0	0	0	0	0	0	0	0	0	0
TIGIT_NECTIN3	0	0.002	0	0	0	0.008	0.006	0	0.008	0	0	0	0	0	0	0	0.007	0.002	0	0	0	0	0	0	0	0	0	0	0	0.012	0	0	0	0	0	0	0	0	0.01	0	0	0	0	0	0	0	0	0	0
NECTIN2_NECTIN3	0	0.001	0	0	0	0.007	0.005	0	0.007	0	0	0	0	0	0	0	0.006	0.001	0	0	0	0	0	0	0	0	0	0	0	0.011	0	0	0	0	0	0	0	0	0.01	0	0	0	0	0.004	0	0	0	0.01	0.008
CADM3_CADM1	0	0	0	0	0	0	0	0	0	0	0	0	0	0	0	0	0	0	0	0	0	0	0	0	0	0	0	0	0	0	0	0	0	0	0	0	0	0	0	0	0	0	0	0	0	0	0	0	0
CADM1_CADM1	0	0	0	0	0	0	0	0	0	0	0	0	0	0	0	0	0	0	0	0	0	0	0	0	0	0	0	0	0	0	0	0	0	0	0	0	0	0	0	0	0	0	0	0	0	0	0	0	0
CRTAM_CADM1	0	0	0	0	0	0	0	0	0	0	0	0	0	0	0	0	0	0	0	0	0	0	0	0	0	0	0	0	0	0	0	0	0	0	0	0	0	0	0	0	0	0	0	0	0	0	0	0	0
CADM3_CADM4	0	0	0	0	0	0	0	0	0	0	0	0	0	0	0	0	0	0	0	0	0	0	0	0	0	0	0	0	0	0	0	0	0	0	0	0	0	0	0	0	0	0	0	0	0	0	0	0	0
CADM3_EPB41L1	0	0	0	0	0	0	0	0	0	0	0	0	0	0	0	0	0	0	0	0	0	0	0	0	0	0	0	0	0	0	0	0	0	0	0	0	0	0	0	0	0	0	0	0	0	0	0	0	0
NECTIN1_CADM3	0	0	0	0.016	0	0.017	0	0	0.015	0	0	0	0	0	0	0	0.015	0	0	0	0	0	0	0	0	0	0	0	0	0	0	0	0	0	0	0	0	0	0	0	0	0	0	0	0	0	0	0	0
TIGIT_NECTIN2	0.001	0.005	0.008	0.028	0	0.044	0.011	0.013	0.018	0.02	0.005	0.005	0.008	0.003	0	0	0.031	0	0.004	0.007	0	0.001	0	0.008	0.006	0	0.007	0.001	0.002	0.012	0	0.009	0.003	0	0	0	0.004	0.012	0.014	0.007	0.003	0.003	0	0	0	0	0	0	0
CD226_NECTIN2	0.001	0.004	0.007	0.027	0	0.044	0.01	0.012	0.017	0.019	0.005	0.004	0.008	0.002	0	0	0.03	0	0.004	0.007	0	0.001	0	0.007	0.006	0	0.006	0.001	0.001	0.011	0	0.008	0.002	0	0	0	0.003	0.011	0.013	0.007	0.002	0.002	0	0	0	0	0	0	0
CDH1_KLRG1	0.001	0.002	0	0	0	0.001	0	0.006	0.003	0	0.013	0.018	0	0	0	0	0.001	0.074	0.006	0.005	0	0.003	0	0	0	0	0	0.001	0.002	0	0	0.005	0.002	0	0	0.028	0.001	0	0	0.007	0.003	0.002	0	0	0	0	0	0	0
SPP1_CD44	0.051	0.005	0.064	0.013	0	0.026	0.07	0.082	0.087	0	0.082	0.111	0.015	0.01	0.005	0.053	0.021	0.084	0.109	0.102	0.129	0.084	0.015	0.007	0.103	0.006	0.026	0.025	0.152	0.027	0.023	0.055	0.013	0.036	0.107	0.139	0.164	0.115	0.032	0.095	0.128	0.048	0	0	0	0	0	0	0
LGALS9_CD44	0.064	0.019	0.078	0.026	0	0.039	0.083	0.095	0.101	0	0.095	0.124	0.028	0.023	0.018	0.067	0.034	0.098	0.123	0.115	0.142	0.098	0.029	0.02	0.116	0.02	0.039	0.039	0.165	0.04	0.036	0.068	0.026	0.049	0.12	0.152	0.178	0.128	0.046	0.109	0.141	0.061	0.114	0.068	0.127	0.076	0	0.089	0.133
HGF_CD44	0.051	0.006	0.065	0.013	0	0.026	0.07	0.082	0.088	0	0.082	0.112	0.015	0.01	0.005	0.054	0.021	0.085	0.11	0.102	0.129	0.085	0.016	0.008	0.103	0.007	0.026	0.026	0.152	0.027	0.023	0.055	0.014	0.036	0.108	0.139	0.165	0.115	0.033	0.096	0.128	0.048	0.051	0.006	0.064	0.013	0	0.026	0.07
CD44_FGFR2	0	0	0	0.06	0	0.057	0.058	0	0.054	0	0	0	0	0	0	0	0.059	0	0	0	0	0	0	0	0	0	0.053	0	0	0.072	0	0	0	0	0	0	0	0	0.063	0	0	0	0	0	0	0.014	0	0.011	0.012
FGF7_FGFR2	0	0	0	0.01	0	0.006	0.008	0	0.004	0	0	0	0	0	0	0	0.009	0	0	0	0	0	0	0	0	0	0.003	0	0	0.021	0	0	0	0	0	0	0	0	0.013	0	0	0	0	0	0	0	0	0	0
TIMP1_FGFR2	0	0	0	0.017	0	0.014	0.015	0	0.012	0	0	0	0	0	0	0	0.017	0	0	0	0	0	0	0	0	0	0.011	0	0	0.029	0	0	0	0	0	0	0	0	0.02	0	0	0	0	0	0	0.011	0	0.008	0.009
FGFR1_FGFR2	0	0	0	0	0	0	0	0	0	0	0	0	0	0	0	0	0	0	0	0	0	0	0	0	0	0	0	0	0	0	0	0	0	0	0	0	0	0	0	0	0	0	0	0	0	0.01	0	0.007	0.008
FGF7_FGFR3	0.001	0	0	0.013	0	0.014	0.013	0.001	0.004	0	0	0	0	0	0	0.006	0.015	0	0	0.001	0	0	0	0.028	0	0	0	0.002	0	0.058	0	0.001	0	0	0	0	0.001	0	0.024	0	0.001	0.004	0	0	0	0	0	0	0
FGFR2_FGFR3	0	0	0	0	0	0	0	0	0	0	0	0	0	0	0	0	0	0	0	0	0	0	0	0	0	0	0	0	0	0	0	0	0	0	0	0	0	0	0	0	0	0	0	0	0	0	0	0	0
SPP1_PTGER4	0.003	0	0.007	0.01	0	0.026	0.015	0.011	0.02	0	0.005	0.023	0	0	0.01	0.006	0.021	0.014	0.009	0.008	0.007	0.008	0	0	0	0	0.003	0	0.027	0	0	0.005	0.006	0	0	0.028	0.013	0	0.019	0.004	0.018	0	0	0	0	0	0	0	0
TGFB1_TGFBR3	0.017	0	0	0.054	0	0.064	0.037	0	0.04	0	0	0.017	0	0	0.019	0	0.066	0.071	0	0	0.018	0.016	0	0.021	0	0	0.017	0.014	0.015	0.033	0	0.015	0	0	0	0.069	0.015	0.036	0.064	0.017	0	0	0	0	0	0	0	0	0
TGFB3_TGFBR3	0.004	0	0	0.04	0	0.051	0.024	0	0.026	0	0	0.003	0	0	0.005	0	0.053	0.057	0	0	0.005	0.003	0	0.008	0	0	0.004	0.001	0.002	0.02	0	0.002	0	0	0	0.055	0.001	0.022	0.051	0.003	0	0	0	0	0	0	0	0	0
JAM2_JAM3	0.001	0.001	0.003	0.017	0.003	0.01	0.003	0.003	0.004	0.047	0	0.002	0	0	0	0	0.014	0	0.002	0	0	0.001	0	0	0	0	0	0.001	0.001	0.006	0	0.002	0.002	0	0	0	0.001	0.022	0.021	0.008	0.002	0.002	0.002	0.002	0.005	0.018	0.004	0.011	0.004
JAM3_JAM3	0.001	0.001	0.003	0.017	0.002	0.009	0.003	0.003	0.003	0.047	0	0.002	0	0	0	0	0.014	0	0.001	0	0	0.001	0	0	0	0	0	0.001	0.001	0.006	0	0.002	0.002	0	0	0	0.001	0.022	0.021	0.007	0.001	0.002	0.001	0.001	0.003	0.017	0.003	0.01	0.003
FFAR2_FAM3C	0.004	0.008	0.009	0.017	0	0.01	0.003	0.004	0.006	0	0.005	0.003	0.008	0.006	0	0	0.012	0.007	0.005	0.002	0.005	0.003	0	0.014	0	0.006	0.003	0.002	0.001	0.016	0.015	0.003	0.006	0	0.023	0	0.002	0	0.011	0.007	0.002	0.008	0	0	0	0	0	0	0
HLA-C_FAM3C	0.476	0.481	0.481	0.49	0	0.483	0.475	0.477	0.478	0	0.477	0.475	0.48	0.478	0	0	0.485	0.479	0.478	0.474	0.477	0.475	0	0.486	0	0.479	0.476	0.474	0.474	0.488	0.488	0.476	0.478	0	0.495	0	0.474	0	0.484	0.48	0.475	0.481	0.526	0.531	0.531	0.54	0	0.533	0.525
LAMP1_FAM3C	0.04	0.044	0.044	0.053	0	0.046	0.038	0.04	0.041	0	0.04	0.039	0.043	0.042	0	0	0.048	0.042	0.041	0.037	0.04	0.038	0	0.05	0	0.042	0.039	0.038	0.037	0.052	0.051	0.039	0.042	0	0.059	0	0.038	0	0.047	0.043	0.038	0.044	0.044	0.048	0.049	0.057	0	0.05	0.043
KIR2DL3_FAM3C	0	0	0	0	0	0	0	0	0	0	0	0	0	0	0	0	0	0	0	0	0	0	0	0	0	0	0	0	0	0	0	0	0	0	0	0	0	0	0	0	0	0	0	0	0	0	0	0	0
CXADR_FAM3C	0	0	0	0	0	0	0	0	0	0	0	0	0	0	0	0	0	0	0	0	0	0	0	0	0	0	0	0	0	0	0	0	0	0	0	0	0	0	0	0	0	0	0	0	0	0	0	0	0
ADGRG5_FAM3C	0.026	0.031	0.031	0.04	0	0.033	0.025	0.027	0.028	0	0.027	0.025	0.03	0.028	0	0	0.035	0.029	0.028	0.024	0.027	0.025	0	0.036	0	0.029	0.026	0.024	0.024	0.039	0.038	0.026	0.028	0	0.045	0	0.024	0	0.034	0.03	0.025	0.031	0	0	0	0	0	0	0
FFAR2_CCL4L2	0.001	0	0.003	0.002	0	0.001	0.007	0.001	0.001	0.005	0	0.002	0	0	0	0	0.001	0.081	0.001	0.001	0.003	0.001	0	0.007	0	0	0	0	0.003	0	0	0	0	0	0	0.066	0.002	0	0.002	0.002	0.006	0	0	0	0	0	0	0	0
PGRMC2_CCL4L2	0.016	0	0.017	0.017	0	0.016	0.021	0.016	0.016	0.02	0	0.016	0	0	0	0	0.015	0.095	0.016	0.016	0.017	0.016	0	0.022	0	0	0	0	0.018	0	0	0	0	0	0	0.081	0.017	0	0.017	0.016	0.021	0	0.008	0	0.009	0.008	0	0.007	0.013
FFAR2_TNF	0.002	0.005	0.003	0	0	0	0	0.001	0.004	0	0	0.011	0	0	0	0	0.001	0.014	0.005	0.004	0.005	0.002	0	0	0.006	0	0	0	0.017	0	0	0	0.01	0	0.011	0.009	0.005	0.011	0	0.007	0.007	0	0	0	0	0	0	0	0
HLA-C_KIR2DL3	0	0	0	0	0	0	0	0	0	0	0	0	0	0	0	0	0	0.482	0	0	0	0	0	0	0	0	0	0.473	0.473	0	0	0	0	0	0	0.482	0.473	0	0	0	0.473	0	0	0	0	0	0	0	0
HLA-C_KIR2DL1	0.473	0	0	0	0	0.473	0	0	0.473	0	0	0	0	0	0	0	0	0.483	0.474	0	0	0	0	0	0	0	0	0	0	0	0	0	0	0	0	0.482	0.473	0	0	0	0	0	0.523	0	0	0	0	0.523	0
ASGR2_ADIPOQ	0	0	0	0	0	0	0	0	0	0	0	0	0	0	0	0	0	0	0	0	0	0	0	0	0	0	0	0	0	0	0	0	0	0	0	0	0	0	0	0	0	0	0	0	0	0	0	0	0
LAMP1_VSTM1	0.037	0	0	0	0	0.036	0	0.043	0.06	0	0.061	0	0.038	0.038	0.142	0.039	0.037	0	0.061	0.047	0.065	0.036	0.037	0	0.041	0	0	0.036	0.051	0	0	0.062	0	0.13	0	0.087	0.084	0	0.038	0.04	0.039	0.039	0.041	0	0	0	0	0.041	0
KIR2DL3_CXCL9	0	0	0	0	0	0	0	0	0	0	0	0	0	0	0	0	0	0	0	0	0	0	0	0	0	0	0	0	0	0	0	0	0	0	0	0	0	0	0	0	0	0	0	0	0	0	0	0	0
CXCR3_CXCL9	0	0	0	0.108	0	0.1	0	0	0.101	0	0	0	0	0	0	0	0.101	0	0	0	0	0	0	0	0	0	0	0	0	0	0	0	0	0	0	0	0.098	0	0	0	0.099	0	0	0	0	0	0	0	0
DPP4_CXCL9	0	0	0	0.017	0	0.01	0	0	0.01	0	0	0	0	0	0	0	0.011	0	0	0	0	0	0	0	0	0	0	0	0	0	0	0	0	0	0	0	0.008	0	0	0	0.008	0	0	0	0	0	0	0	0
FCGR2A_CXCL9	0	0	0	0.01	0	0.003	0	0	0.003	0	0	0	0	0	0	0	0.004	0	0	0	0	0	0	0	0	0	0	0	0	0	0	0	0	0	0	0	0.001	0	0	0	0.001	0	0	0	0	0	0	0	0
EGFR_NRG1	0	0	0	0	0	0	0	0	0.003	0	0	0	0	0	0	0	0	0	0.002	0	0.003	0.001	0	0	0	0	0	0	0.001	0	0	0	0	0	0	0.009	0.008	0	0	0	0.001	0	0	0	0	0	0	0	0
HLA-DPB1_NRG1	0	0	0	0	0	0	0	0	0.46	0	0	0	0	0	0	0	0	0	0.459	0	0.46	0.458	0	0	0	0	0	0	0.458	0	0	0	0	0	0	0.467	0.466	0	0	0	0.458	0	0	0	0	0	0	0	0
ADGRL1_NRG1	0	0	0	0	0	0	0	0	0.003	0	0	0	0	0	0	0	0	0	0.002	0	0.003	0.001	0	0	0	0	0	0	0.001	0	0	0	0	0	0	0.009	0.008	0	0	0	0.001	0	0	0	0	0	0	0	0
EGFR_TGFA	0	0	0	0	0	0	0	0.001	0	0	0	0	0	0	0	0	0.001	0.001	0	0	0	0	0	0	0	0	0.009	0	0	0	0	0	0	0	0	0	0.001	0	0	0.002	0.001	0	0	0	0	0	0	0	0
EGFR_TGFB1	0.014	0	0.005	0.005	0	0.002	0.008	0.013	0.006	0.252	0.017	0.028	0.003	0	0	0	0.002	0.039	0.007	0.006	0.005	0.005	0	0.014	0.011	0	0.015	0.004	0.013	0.011	0.004	0.004	0.005	0.01	0.016	0.028	0.011	0	0.002	0.012	0.007	0.004	0	0	0	0	0	0	0
EGFR_MIF	0.024	0.026	0.064	0.044	0.016	0.011	0.014	0.097	0.011	0	0.064	0.049	0.008	0.019	0.028	0.017	0.019	0.033	0.025	0.082	0.019	0.022	0.016	0.094	0.006	0.011	0.087	0.084	0.011	0.027	0.023	0.17	0.088	0.005	0.035	0	0.014	0.011	0.017	0.019	0.023	0.043	0	0	0	0	0	0	0
CD74_MIF	1.282	1.284	1.322	1.301	1.273	1.269	1.272	1.354	1.268	0	1.321	1.306	1.265	1.277	1.286	1.274	1.277	1.291	1.283	1.34	1.277	1.279	1.274	1.352	1.263	1.268	1.345	1.342	1.269	1.284	1.28	1.427	1.346	1.263	1.293	0	1.272	1.269	1.275	1.277	1.281	1.301	1.132	1.133	1.171	1.151	1.123	1.119	1.122
EGFR_AREG	0.024	0.009	0.167	0.002	0.002	0.001	0.067	0.17	0.032	0	0.083	0.055	0.005	0	0.01	0.008	0.001	0.022	0.152	0.164	0.094	0.08	0.002	0	0.084	0	0.039	0.002	0.012	0.009	0.023	0.234	0.013	0.025	0.024	0.028	0.031	0.142	0	0.061	0.235	0.002	0	0	0	0	0	0	0
ICAM1_AREG	0.027	0.012	0.17	0.005	0.006	0.004	0.07	0.173	0.035	0	0.087	0.058	0.008	0	0.013	0.012	0.004	0.026	0.156	0.167	0.097	0.084	0.005	0	0.088	0	0.042	0.005	0.015	0.012	0.026	0.237	0.017	0.028	0.028	0.031	0.034	0.145	0	0.065	0.238	0.005	0	0	0	0	0	0	0
EGFR_GRN	0.211	0.003	0.013	0.088	0.023	0.081	0.121	0.04	0.202	0.005	0.105	0.017	0.048	0.021	0.148	0.039	0.084	0.016	0.316	0.182	0.216	0.095	0.042	0.018	0.204	0.023	0.045	0.016	0.11	0.042	0.017	0.043	0.01	0.157	0.048	0.215	0.274	0.16	0.052	0.032	0.215	0.029	0	0	0	0	0	0	0
TNFRSF1A_GRN	0.231	0.023	0.033	0.108	0.044	0.101	0.141	0.06	0.222	0.025	0.125	0.037	0.068	0.041	0.168	0.059	0.104	0.037	0.336	0.202	0.236	0.115	0.062	0.038	0.224	0.043	0.066	0.036	0.13	0.063	0.038	0.063	0.03	0.177	0.068	0.235	0.295	0.18	0.072	0.053	0.235	0.049	0.235	0.028	0.037	0.113	0.048	0.105	0.146
NTRK1_GRN	0	0	0	0	0	0	0	0	0	0	0	0	0	0	0	0	0	0	0	0	0	0	0	0	0	0	0	0	0	0	0	0	0	0	0	0	0	0	0	0	0	0	0	0	0	0	0	0	0
TNFRSF1B_GRN	0.23	0.023	0.033	0.108	0.043	0.1	0.141	0.059	0.222	0.025	0.125	0.036	0.068	0.041	0.168	0.059	0.103	0.036	0.335	0.202	0.236	0.114	0.062	0.038	0.224	0.042	0.065	0.036	0.129	0.062	0.037	0.063	0.029	0.177	0.067	0.234	0.294	0.18	0.071	0.052	0.235	0.049	0	0	0	0	0	0	0
EGFR_COPA	0.058	0.038	0.029	0.032	0.004	0.031	0.025	0.039	0.045	0.035	0.03	0.041	0.015	0.002	0.028	0.037	0.043	0.036	0.059	0.049	0.077	0.04	0.003	0.007	0.067	0.002	0.065	0.023	0.045	0.04	0.008	0.035	0.04	0.025	0.027	0.048	0.051	0.065	0.057	0.08	0.049	0.052	0	0	0	0	0	0	0
CD74_COPA	1.316	1.296	1.287	1.29	1.262	1.289	1.283	1.297	1.302	1.293	1.288	1.299	1.273	1.26	1.286	1.295	1.3	1.294	1.316	1.307	1.335	1.297	1.261	1.265	1.325	1.26	1.323	1.281	1.303	1.298	1.266	1.293	1.298	1.282	1.284	1.305	1.309	1.323	1.315	1.338	1.306	1.309	1.165	1.146	1.136	1.14	1.112	1.139	1.132
NTRK1_COPA	0	0	0	0	0	0	0	0	0	0	0	0	0	0	0	0	0	0	0	0	0	0	0	0	0	0	0	0	0	0	0	0	0	0	0	0	0	0	0	0	0	0	0	0	0	0	0	0	0
EGFR_EPGN	0	0	0	0	0	0	0	0.007	0.002	0	0.013	0.002	0	0	0	0	0	0	0.002	0.002	0	0	0	0	0	0	0.012	0.003	0.001	0	0	0.001	0	0	0	0	0.001	0	0	0.007	0.001	0.01	0	0	0	0	0	0	0
EGFR_HBEGF	0.003	0.002	0.006	0	0	0.002	0	0.003	0.022	0	0.005	0	0	0	0	0.003	0.001	0.001	0.031	0.011	0.029	0.001	0	0	0	0	0.003	0	0.018	0.006	0	0.006	0.003	0	0	0.046	0.042	0.011	0.002	0.003	0.047	0	0	0	0	0	0	0	0
CD44_HBEGF	0.053	0.052	0.056	0	0	0.052	0	0.053	0.072	0	0.055	0	0	0	0	0.053	0.051	0.052	0.081	0.061	0.079	0.051	0	0	0	0	0.053	0	0.068	0.056	0	0.056	0.053	0	0	0.096	0.092	0.061	0.052	0.053	0.097	0	0.007	0.007	0.01	0	0	0.007	0
HLA-DPB1_TNFSF13B	0.51	0.46	0.479	0.485	0	0.473	0.499	0.52	0.559	0.497	0.532	0.468	0	0	0.462	0.479	0.477	0.462	0.613	0.635	0.566	0.478	0	0	0.528	0	0.474	0.462	0.564	0	0	0.575	0	0.466	0.463	0.531	0.63	0.566	0.469	0.472	0.549	0.463	0.567	0.517	0.537	0.542	0	0.53	0.556
TNFRSF13B_TNFSF13B	0.053	0.003	0.023	0.028	0	0.016	0.043	0.063	0.102	0.041	0.075	0.011	0	0	0.006	0.023	0.02	0.005	0.156	0.178	0.109	0.021	0	0	0.071	0	0.017	0.006	0.107	0	0	0.118	0	0.009	0.006	0.074	0.174	0.109	0.012	0.015	0.092	0.006	0	0	0	0	0	0	0
TFRC_TNFSF13B	0.075	0.025	0.045	0.05	0	0.038	0.065	0.085	0.124	0.063	0.097	0.033	0	0	0.028	0.045	0.042	0.027	0.178	0.2	0.131	0.043	0	0	0.093	0	0.039	0.028	0.129	0	0	0.14	0	0.031	0.028	0.096	0.196	0.131	0.034	0.037	0.114	0.028	0.068	0.018	0.038	0.043	0	0.031	0.057
CD40_TNFSF13B	0.054	0.004	0.024	0.029	0	0.017	0.044	0.064	0.103	0.042	0.076	0.012	0	0	0.007	0.024	0.021	0.006	0.157	0.179	0.11	0.022	0	0	0.072	0	0.018	0.007	0.108	0	0	0.12	0	0.01	0.007	0.075	0.175	0.11	0.013	0.017	0.093	0.007	0.054	0.004	0.024	0.029	0	0.017	0.044
TNFRSF17_TNFSF13B	0.063	0.012	0.032	0.038	0	0.026	0.052	0.072	0.111	0.05	0.085	0.021	0	0	0.015	0.032	0.03	0.014	0.165	0.187	0.118	0.031	0	0	0.081	0	0.026	0.015	0.116	0	0	0.128	0	0.019	0.016	0.083	0.183	0.119	0.022	0.025	0.102	0.015	0	0	0	0	0	0	0
TNFRSF13C_TNFSF13B	0.053	0.002	0.022	0.028	0	0.015	0.042	0.062	0.101	0.04	0.075	0.011	0	0	0.005	0.022	0.019	0.004	0.155	0.177	0.108	0.02	0	0	0.071	0	0.016	0.005	0.106	0	0	0.118	0	0.009	0.006	0.073	0.173	0.109	0.011	0.015	0.092	0.005	0.053	0.003	0.023	0.028	0	0.016	0.043
CD74_APP	1.616	1.283	1.288	1.527	0	1.451	1.449	1.289	1.385	1.379	1.292	1.273	0	1.262	1.282	1.277	1.507	1.264	1.304	1.288	1.422	1.47	1.261	0	1.513	1.261	0	1.259	1.272	1.351	1.262	1.29	1.286	1.268	1.269	1.3	1.29	1.329	1.477	1.321	1.293	1.263	1.465	1.133	1.138	1.377	0	1.301	1.299
ICAM1_SPN	0.026	0.016	0.023	0	0.006	0.004	0.02	0.056	0.016	0	0.063	0.021	0	0.005	0.056	0.028	0.005	0.03	0.042	0.059	0.039	0.025	0	0	0.009	0.006	0.064	0.046	0.054	0	0	0.06	0.009	0.014	0.009	0.022	0.023	0.036	0	0.059	0.032	0.121	0	0	0	0	0	0	0
ICAM1_ITGAL	0.021	0.006	0.012	0	0	0.004	0.021	0.009	0.015	0	0.029	0.033	0.006	0	0.008	0.009	0.004	0.104	0.035	0.025	0.027	0.024	0.005	0	0.03	0	0.009	0.004	0.097	0.009	0.007	0.005	0.012	0.01	0.019	0.124	0.033	0	0.005	0.019	0.027	0	0	0	0	0	0	0	0
TNFRSF1A_FASLG	0	0	0	0	0	0	0.025	0	0	0	0	0.022	0	0	0	0	0	0.054	0	0	0	0	0	0	0	0	0	0	0.021	0	0	0	0	0	0	0.03	0.021	0	0	0	0	0	0	0	0	0	0	0	0.03
TNFRSF10B_FASLG	0	0	0	0	0	0	0.005	0	0	0	0	0.002	0	0	0	0	0	0.033	0	0	0	0	0	0	0	0	0	0	0.001	0	0	0	0	0	0	0.009	0.001	0	0	0	0	0	0	0	0	0	0	0	0.008
FAS_FASLG	0	0	0	0	0	0	0.007	0	0	0	0	0.003	0	0	0	0	0	0.035	0	0	0	0	0	0	0	0	0	0	0.002	0	0	0	0	0	0	0.011	0.002	0	0	0	0	0	0	0	0	0	0	0	0
NTRK1_GPI	0	0	0	0	0	0	0	0	0	0	0	0	0	0	0	0	0	0	0	0	0	0	0	0	0	0	0	0	0	0	0	0	0	0	0	0	0	0	0	0	0	0	0	0	0	0	0	0	0
NTRK1_NAMPT	0	0	0	0	0	0	0	0	0	0	0	0	0	0	0	0	0	0	0	0	0	0	0	0	0	0	0	0	0	0	0	0	0	0	0	0	0	0	0	0	0	0	0	0	0	0	0	0	0
NTRK1_AIMP1	0	0	0	0	0	0	0	0	0	0	0	0	0	0	0	0	0	0	0	0	0	0	0	0	0	0	0	0	0	0	0	0	0	0	0	0	0	0	0	0	0	0	0	0	0	0	0	0	0
NRP1_VEGFA	0.037	0.037	0	0.042	0.039	0.07	0.054	0.039	0.06	0	0	0.038	0.039	0	0.046	0.042	0.055	0	0.046	0.041	0.055	0	0.038	0.054	0	0	0	0.043	0.039	0.066	0.048	0.039	0	0.049	0	0.055	0.058	0.048	0.067	0.044	0.054	0.065	0.002	0.002	0	0.006	0.004	0.035	0.019
NRP2_VEGFA	0	0	0	0	0	0	0	0	0	0	0	0	0	0	0	0	0	0	0	0	0	0	0	0	0	0	0	0	0	0	0	0	0	0	0	0	0	0	0	0	0	0	0.001	0.001	0	0.005	0.003	0.034	0.018
NRP1_PGF	0.038	0.037	0.04	0.163	0	0.173	0.118	0.037	0.106	0	0	0.038	0	0	0	0	0.181	0.038	0.039	0.038	0.041	0.037	0	0.116	0.048	0	0	0.038	0.037	0.12	0	0	0	0	0	0	0.038	0	0.091	0.044	0.038	0	0.003	0.002	0.005	0.127	0	0.138	0.083
NRP2_PGF	0	0	0	0	0	0	0	0	0	0	0	0	0	0	0	0	0	0	0	0	0	0	0	0	0	0	0	0	0	0	0	0	0	0	0	0	0	0	0	0	0	0	0.002	0.001	0.003	0.126	0	0.136	0.082
FLT1_PGF	0.002	0.001	0.003	0.126	0	0.136	0.082	0.001	0.07	0	0	0.002	0	0	0	0	0.144	0.002	0.003	0.001	0.005	0.001	0	0.079	0.011	0	0	0.001	0.001	0.084	0	0	0	0	0	0	0.001	0	0.055	0.007	0.001	0	0	0	0	0	0	0	0
NRP1_VEGFB	0.253	0.058	0.063	0.106	0.045	0.087	0.117	0.065	0.073	0	0.073	0.07	0.059	0.041	0	0.04	0.085	0.065	0.049	0.086	0.124	0.151	0.049	0.118	0.125	0.043	0.057	0.056	0.04	0.101	0.041	0.065	0.07	0	0.105	0.055	0.046	0.091	0.06	0.055	0.061	0.042	0.218	0.023	0.027	0.071	0.009	0.052	0.082
FLT1_VEGFB	0.216	0.022	0.026	0.07	0.008	0.051	0.081	0.029	0.037	0	0.037	0.034	0.022	0.004	0	0.003	0.049	0.028	0.013	0.05	0.088	0.114	0.013	0.081	0.089	0.006	0.02	0.02	0.004	0.064	0.004	0.028	0.034	0	0.069	0.019	0.009	0.055	0.024	0.019	0.025	0.005	0	0	0	0	0	0	0
ADRB2_VEGFB	0.218	0.023	0.028	0.071	0.01	0.052	0.082	0.03	0.038	0	0.038	0.035	0.024	0.006	0	0.005	0.05	0.03	0.014	0.051	0.089	0.116	0.014	0.083	0.09	0.008	0.022	0.021	0.005	0.066	0.006	0.03	0.035	0	0.07	0.02	0.011	0.056	0.025	0.02	0.026	0.007	0	0	0	0	0	0	0
NRP2_SEMA3F	0	0	0	0	0	0	0	0	0	0	0	0	0	0	0	0	0	0	0	0	0	0	0	0	0	0	0	0	0	0	0	0	0	0	0	0	0	0	0	0	0	0	0	0	0	0.002	0	0.002	0
NRP2_SEMA3C	0	0	0	0	0	0	0	0	0	0	0	0	0	0	0	0	0	0	0	0	0	0	0	0	0	0	0	0	0	0	0	0	0	0	0	0	0	0	0	0	0	0	0.01	0	0	0.008	0	0.004	0.005
HLA-A_KIR3DL1	0	0	0	0	0	0	0	0	0	0	0	0	0	0	0	0	0	0.395	0	0	0	0	0	0	0	0	0	0	0	0	0	0	0	0	0	0	0	0	0	0	0	0	0	0	0	0	0	0	0
HLA-F_KIR3DL1	0	0	0	0	0	0	0	0	0	0	0	0	0	0	0	0	0	0.045	0	0	0	0	0	0	0	0	0	0	0	0	0	0	0	0	0	0	0	0	0	0	0	0	0	0	0	0	0	0	0
CCL4L2_VSIR	0.005	0.002	0.013	0.004	0	0.005	0	0.003	0.013	0.029	0.005	0.011	0.004	0	0	0.006	0.003	0.005	0.019	0.01	0.01	0.004	0	0	0.006	0.003	0	0.002	0.039	0.006	0	0.002	0	0.009	0	0.025	0.029	0	0	0.004	0.018	0	0	0	0	0	0	0	0
TNF_VSIR	0.005	0.002	0.013	0.005	0	0.005	0	0.003	0.013	0.029	0.006	0.011	0.004	0	0	0.007	0.004	0.005	0.019	0.011	0.01	0.004	0	0	0.007	0.003	0	0.002	0.04	0.007	0	0.003	0	0.01	0	0.025	0.029	0	0	0.004	0.018	0	0.009	0.005	0.017	0.008	0	0.008	0
HLA-F_KIR3DL2	0	0	0	0	0	0.036	0.039	0	0.037	0	0	0.038	0	0	0	0	0.037	0.055	0.037	0	0	0	0	0	0	0	0	0	0	0	0	0	0	0	0	0.045	0	0	0	0	0	0	0	0	0	0	0	0.081	0.083
HLA-B_KIR3DL2	0	0	0	0	0	0.658	0.661	0	0.659	0	0	0.66	0	0	0	0	0.658	0.677	0.659	0	0	0	0	0	0	0	0	0	0	0	0	0	0	0	0	0.667	0	0	0	0	0	0	0	0	0	0	0	0.803	0.806
HLA-F_LILRB2	0.074	0.054	0.041	0	0	0.037	0.052	0.04	0.073	0	0.06	0.038	0	0	0.041	0.047	0.039	0.039	0.074	0.046	0.067	0.043	0	0	0.077	0.038	0.039	0.037	0.253	0	0	0	0.039	0.066	0.042	0.082	0.117	0	0.038	0.047	0.073	0	0.118	0.098	0.085	0	0	0.082	0.097
CD1D_LILRB2	0.038	0.018	0.005	0	0	0.001	0.016	0.004	0.037	0	0.024	0.002	0	0	0.005	0.011	0.003	0.003	0.038	0.01	0.031	0.007	0	0	0.041	0.002	0.003	0.001	0.217	0	0	0	0.003	0.03	0.006	0.046	0.081	0	0.002	0.011	0.037	0	0	0	0	0	0	0	0
HLA-G_LILRB2	0.038	0.018	0.005	0	0	0.001	0.016	0.004	0.037	0	0.024	0.002	0	0	0.005	0.011	0.003	0.003	0.038	0.01	0.031	0.007	0	0	0.041	0.002	0.003	0.001	0.217	0	0	0	0.003	0.03	0.006	0.046	0.081	0	0.002	0.011	0.037	0	0.039	0.019	0.006	0	0	0.003	0.018
HLA-F_LILRB1	0.048	0.04	0.038	0	0	0.036	0.039	0.037	0.04	0	0.041	0	0	0	0	0	0.037	0.042	0.039	0.038	0.039	0.039	0.038	0	0.052	0	0.039	0	0.062	0	0	0	0	0	0.042	0	0.042	0.047	0	0	0.041	0	0.093	0.085	0.082	0	0	0.081	0.083
HLA-G_LILRB1	0.012	0.004	0.002	0	0	0	0.003	0.001	0.004	0	0.005	0	0	0	0	0	0.001	0.006	0.003	0.002	0.003	0.003	0.002	0	0.016	0	0.003	0	0.026	0	0	0	0	0	0.006	0	0.006	0.011	0	0	0.005	0	0.014	0.006	0.003	0	0	0.002	0.004
CCL4_CCR5	0.007	0	0	0	0	0	0.005	0	0	0	0	0.005	0	0	0	0	0	0.003	0	0	0	0.006	0	0	0	0	0	0	0.004	0	0	0	0	0	0	0	0.003	0	0	0.004	0.004	0	0.005	0	0	0	0	0	0.003
CCL3_CCR5	0.006	0	0	0	0	0	0.004	0	0	0	0	0.003	0	0	0	0	0	0.002	0	0	0	0.005	0	0	0	0	0	0	0.002	0	0	0	0	0	0	0	0.001	0	0	0.002	0.002	0	0.005	0	0	0	0	0	0.003
CCL5_CCR5	0.009	0	0	0	0	0	0.007	0	0	0	0	0.007	0	0	0	0	0	0.005	0	0	0	0.008	0	0	0	0	0	0	0.005	0	0	0	0	0	0	0	0.005	0	0	0.006	0.005	0	0	0	0	0	0	0	0
CCL4_SLC7A1	0.005	0.003	0.006	0	0	0.003	0.005	0.008	0	0	0.007	0.007	0.005	0	0	0.016	0.003	0.004	0.004	0.009	0.007	0.005	0.004	0.01	0	0.005	0.006	0.01	0.004	0.008	0	0.007	0.006	0	0.008	0.012	0.005	0	0	0.012	0.004	0.022	0.003	0.001	0.003	0	0	0.001	0.003
CSF1_SLC7A1	0.003	0.001	0.003	0	0	0.001	0.003	0.006	0	0	0.005	0.005	0.003	0	0	0.014	0.001	0.002	0.002	0.007	0.005	0.003	0.002	0.008	0	0.003	0.004	0.008	0.001	0.006	0	0.004	0.004	0	0.006	0.01	0.002	0	0	0.01	0.002	0.02	0	0	0	0	0	0	0
IGF2_IDE	0	0	0	0	0	0	0	0	0	0	0	0	0	0	0	0	0	0	0	0	0	0	0	0	0	0	0	0	0	0	0	0	0	0	0	0	0	0	0	0	0	0	0	0	0	0	0	0	0
CCL3_IDE	0.005	0.003	0.007	0.003	0.003	0.006	0.011	0.004	0.005	0	0.014	0.004	0.004	0	0	0.004	0.007	0.006	0.009	0.007	0.008	0.004	0	0	0	0.003	0.01	0.007	0.007	0.006	0	0.007	0.003	0	0	0.019	0.006	0.012	0	0.009	0.004	0.012	0.005	0.002	0.006	0.002	0.003	0.005	0.01
IGF2_IGF1R	0	0	0	0	0	0	0	0	0	0	0	0	0	0	0	0	0	0	0	0	0	0	0	0	0	0	0	0	0	0	0	0	0	0	0	0	0	0	0	0	0	0	0	0	0	0	0	0	0
IGF1_IGF1R	0	0	0	0	0	0	0	0	0	0	0	0	0	0	0	0	0	0	0	0	0	0	0	0	0	0	0	0	0	0	0	0	0	0	0	0	0	0	0	0	0	0	0	0	0	0	0	0	0
IGF2_IGF2R	0	0	0	0	0	0	0	0	0	0	0	0	0	0	0	0	0	0	0	0	0	0	0	0	0	0	0	0	0	0	0	0	0	0	0	0	0	0	0	0	0	0	0	0	0	0	0	0	0
GRN_SORT1	0.212	0.211	0.212	0	0.212	0.214	0	0.211	0.218	0.247	0.215	0	0	0.212	0.229	0.213	0.214	0	0.221	0.217	0.217	0.213	0	0.217	0	0	0	0	0.226	0	0	0.213	0.212	0.222	0	0.219	0.222	0.221	0.212	0.214	0.217	0	0.005	0.004	0.004	0	0.005	0.007	0
COPA_SORT1	0.06	0.059	0.059	0	0.059	0.061	0	0.059	0.066	0.094	0.062	0	0	0.059	0.076	0.06	0.061	0	0.068	0.064	0.064	0.06	0	0.064	0	0	0	0	0.073	0	0	0.06	0.059	0.069	0	0.067	0.069	0.068	0.059	0.062	0.065	0	0.04	0.039	0.039	0	0.04	0.042	0
ADIPOQ_CD200R1	0	0	0	0.002	0	0.001	0	0	0.001	0	0	0.003	0	0	0.005	0	0.002	0	0	0	0	0	0	0	0	0	0	0.001	0.001	0	0	0	0	0.01	0	0	0.003	0	0.004	0	0.007	0	0	0	0	0.002	0	0.001	0
CD200_CD200R1	0	0	0	0.003	0	0.001	0	0	0.002	0	0	0.004	0	0	0.006	0	0.002	0	0	0	0	0	0	0	0	0	0	0.001	0.002	0	0	0	0	0.01	0	0	0.003	0	0.005	0	0.007	0	0	0	0	0.015	0	0.014	0
ADIPOQ_CLEC2D	0.003	0.024	0.01	0	0.003	0.002	0.006	0.003	0.004	0	0	0.058	0.003	0.003	0	0	0.003	0.026	0.002	0.004	0.003	0.003	0	0.008	0	0.005	0.006	0.002	0.003	0.006	0	0.003	0.026	0.002	0.075	0.01	0.003	0	0.006	0.01	0.003	0.006	0.002	0.024	0.01	0	0.003	0.002	0.005
FAM3C_CLEC2D	0.005	0.027	0.013	0	0.006	0.005	0.008	0.006	0.007	0	0	0.061	0.006	0.005	0	0	0.006	0.029	0.005	0.006	0.006	0.006	0	0.01	0	0.008	0.009	0.004	0.006	0.009	0	0.006	0.029	0.005	0.078	0.013	0.006	0	0.009	0.013	0.006	0.008	0.01	0.032	0.018	0	0.01	0.009	0.013
TNF_DAG1	0.008	0.005	0	0.011	0	0.009	0.006	0.005	0.007	0	0	0	0.004	0	0	0.004	0.01	0.004	0.004	0.002	0.006	0.004	0.003	0	0.007	0	0.012	0.007	0.004	0.007	0.005	0.002	0.004	0	0	0.011	0.004	0	0.014	0.009	0.003	0.013	0.011	0.008	0	0.014	0	0.012	0.01
LGALS9_DAG1	0.02	0.017	0	0.023	0	0.021	0.019	0.017	0.02	0	0	0	0.016	0	0	0.016	0.022	0.016	0.016	0.014	0.018	0.016	0.015	0	0.019	0	0.024	0.019	0.016	0.019	0.017	0.014	0.017	0	0	0.023	0.016	0	0.027	0.021	0.015	0.025	0.07	0.067	0	0.073	0	0.071	0.068
TNF_NOTCH1	0.008	0.01	0.01	0.006	0	0.004	0.006	0.007	0.009	0	0.018	0.008	0	0	0	0.007	0.004	0.012	0.004	0.006	0.015	0.008	0	0.012	0	0	0.004	0.002	0.008	0.007	0	0.005	0.003	0.008	0	0.02	0.007	0	0.011	0.006	0.004	0.006	0.011	0.013	0.013	0.009	0	0.008	0.01
DLL1_NOTCH1	0	0	0	0	0	0	0	0	0	0	0	0	0	0	0	0	0	0	0	0	0	0	0	0	0	0	0	0	0	0	0	0	0	0	0	0	0	0	0	0	0	0	0	0	0	0	0	0	0
TNF_SEMA4C	0.002	0.002	0	0.008	0	0.021	0.011	0.004	0.006	0	0	0.007	0	0	0	0.004	0.012	0.007	0.003	0.003	0	0.002	0	0	0	0	0	0.006	0.004	0.012	0	0	0	0	0	0	0.002	0.012	0.022	0.006	0.002	0.011	0.005	0.005	0	0.011	0	0.024	0.014
PLXNB2_SEMA4C	0.033	0.034	0	0.039	0	0.052	0.043	0.035	0.037	0	0	0.038	0	0	0	0.036	0.043	0.039	0.035	0.034	0	0.033	0	0	0	0	0	0.038	0.035	0.044	0	0	0	0	0	0	0.033	0.044	0.053	0.037	0.033	0.043	0.024	0.024	0	0.029	0	0.043	0.033
TNF_TNFRSF1A	0.022	0.026	0.029	0.13	0	0.165	0.103	0.044	0.098	0.006	0.035	0.015	0	0	0	0.018	0.178	0.025	0.021	0.03	0.021	0.015	0.003	0.035	0.031	0.003	0.01	0.007	0.026	0.113	0	0.026	0.014	0.006	0	0.038	0.025	0.088	0.116	0.019	0.023	0.011	0.025	0.03	0.032	0.133	0	0.169	0.107
LTA_TNFRSF1A	0.022	0.026	0.029	0.13	0	0.165	0.103	0.044	0.098	0.006	0.035	0.015	0	0	0	0.018	0.178	0.025	0.021	0.03	0.021	0.015	0.003	0.035	0.031	0.003	0.01	0.007	0.026	0.113	0	0.026	0.014	0.006	0	0.038	0.025	0.088	0.116	0.019	0.023	0.011	0	0	0	0	0	0	0
TNFSF13_TNFRSF1A	0.022	0.026	0.029	0.129	0	0.165	0.103	0.044	0.097	0.006	0.035	0.015	0	0	0	0.017	0.178	0.024	0.021	0.03	0.021	0.015	0.003	0.035	0.031	0.003	0.01	0.007	0.026	0.112	0	0.026	0.014	0.006	0	0.038	0.025	0.088	0.115	0.018	0.023	0.01	0.022	0.026	0.029	0.13	0	0.165	0.103
TNF_FAS	0.003	0	0	0.014	0	0.018	0.013	0.004	0.014	0.009	0	0.011	0	0	0.006	0.01	0.022	0.016	0.01	0.007	0.004	0.003	0	0	0	0	0	0.003	0.014	0.017	0.005	0.006	0.003	0.005	0	0.011	0.01	0	0.014	0.004	0.008	0	0.007	0	0	0.017	0	0.022	0.016
TNFSF13_FAS	0.003	0	0	0.014	0	0.018	0.012	0.004	0.014	0.008	0	0.011	0	0	0.006	0.009	0.021	0.015	0.01	0.007	0.003	0.003	0	0	0	0	0	0.003	0.014	0.017	0.005	0.006	0.003	0.004	0	0.01	0.01	0	0.014	0.004	0.008	0	0.003	0	0	0.014	0	0.018	0.012
TNF_TNFRSF1B	0.021	0	0.003	0.005	0	0.007	0.009	0.006	0.052	0	0.033	0.011	0	0	0.006	0.014	0.008	0.039	0.045	0.024	0.075	0.012	0	0	0.044	0	0	0.004	0.196	0	0	0.005	0	0.017	0.007	0.098	0.093	0.012	0.005	0.019	0.067	0.013	0.025	0	0.006	0.008	0	0.011	0.012
LTA_TNFRSF1B	0.021	0	0.003	0.005	0	0.007	0.009	0.006	0.052	0	0.033	0.011	0	0	0.006	0.014	0.008	0.039	0.045	0.024	0.075	0.012	0	0	0.044	0	0	0.004	0.196	0	0	0.005	0	0.017	0.007	0.098	0.093	0.012	0.005	0.019	0.067	0.013	0	0	0	0	0	0	0
TNF_RIPK1	0.003	0.003	0.004	0.003	0	0.004	0.006	0.003	0.003	0.006	0	0.003	0	0	0	0.004	0.004	0.006	0.004	0.002	0.004	0.002	0	0	0	0	0.004	0.003	0.003	0	0	0.003	0.004	0	0	0.011	0.003	0	0.005	0.004	0.003	0	0.006	0.006	0.007	0.006	0	0.008	0.01
LTA_RIPK1	0.003	0.003	0.004	0.003	0	0.004	0.006	0.003	0.003	0.006	0	0.003	0	0	0	0.004	0.004	0.006	0.004	0.002	0.004	0.002	0	0	0	0	0.004	0.003	0.003	0	0	0.003	0.004	0	0	0.011	0.003	0	0.005	0.004	0.003	0	0	0	0	0	0	0	0
TNFSF10_RIPK1	0.004	0.004	0.005	0.004	0	0.006	0.007	0.004	0.004	0.007	0	0.004	0	0	0	0.005	0.005	0.007	0.005	0.003	0.005	0.003	0	0	0	0	0.005	0.004	0.004	0	0	0.004	0.005	0	0	0.012	0.004	0	0.006	0.005	0.004	0	0.005	0.005	0.006	0.005	0	0.006	0.008
TNF_PTPRS	0.026	0	0	0.003	0	0.012	0.019	0.002	0.005	0	0	0	0.004	0	0.006	0	0.014	0	0	0	0.021	0.01	0.003	0	0	0	0	0.002	0.002	0.012	0	0	0	0	0	0	0.002	0	0.005	0.012	0.002	0.003	0.03	0	0	0.006	0	0.015	0.022
PTN_PTPRS	0	0	0	0	0	0	0	0	0	0	0	0	0	0	0	0	0	0	0	0	0	0	0	0	0	0	0	0	0	0	0	0	0	0	0	0	0	0	0	0	0	0	0	0	0	0	0	0	0
TNF_CELSR2	0.002	0.002	0	0	0.003	0.002	0	0	0	0	0	0	0	0	0	0	0.003	0.002	0.002	0	0	0.002	0	0	0	0	0	0.002	0	0	0	0	0	0	0	0	0.002	0	0	0	0.003	0	0.005	0.005	0	0	0.007	0.006	0
CXCR3_CCL19	0.099	0	0	0	0	0.099	0	0	0.1	0	0	0	0	0	0	0	0.099	0	0	0	0	0	0	0	0	0	0	0	0	0	0	0	0	0	0	0	0	0	0	0	0	0	0	0	0	0	0	0	0
CCRL2_CCL19	0.001	0	0	0	0	0.002	0	0	0.003	0	0	0	0	0	0	0	0.002	0	0	0	0	0	0	0	0	0	0	0	0	0	0	0	0	0	0	0	0	0	0	0	0	0	0.005	0	0	0	0	0.005	0
CCR7_CCL19	0.007	0	0	0	0	0.007	0	0	0.008	0	0	0	0	0	0	0	0.008	0	0	0	0	0	0	0	0	0	0	0	0	0	0	0	0	0	0	0	0	0	0	0	0	0	0.001	0	0	0	0	0.001	0
DPP4_CXCL12	0.046	0.008	0.009	1.855	0.012	1.611	1.243	0.027	1.33	0.022	0.04	0.036	0.01	0.01	0	0.091	1.694	0.046	0.057	0.05	0.07	0.067	0.01	0.112	0.082	0	0.019	0.012	0.044	0.234	0.021	0.019	0.009	0.009	0.013	0.035	0.07	1.242	1.343	0.027	0.035	0.032	0	0	0	0	0	0	0
ACKR3_CXCL12	0	0	0	0	0	0	0	0	0	0	0	0	0	0	0	0	0	0	0	0	0	0	0	0	0	0	0	0	0	0	0	0	0	0	0	0	0	0	0	0	0	0	0	0	0	0	0	0	0
TNFRSF13B_TNFSF13	0.002	0.002	0.006	0.006	0	0.006	0.006	0.002	0.008	0	0	0	0	0.003	0.006	0.004	0.006	0.002	0.008	0.012	0.005	0.005	0	0	0	0	0	0.002	0.009	0	0	0.005	0.003	0.004	0	0	0.011	0	0	0.005	0.01	0.003	0	0	0	0	0	0	0
TNFRSF13B_CD70	0	0.002	0	0	0	0.001	0	0.001	0	0	0	0.004	0	0	0	0	0.001	0.003	0.002	0	0	0	0	0	0	0	0	0	0.001	0	0	0	0	0	0.012	0	0	0	0.003	0	0.001	0	0	0	0	0	0	0	0
CD27_CD70	0	0.001	0	0	0	0	0	0.001	0	0	0	0.003	0	0	0	0	0.001	0.003	0.001	0	0	0	0	0	0	0	0	0	0.001	0	0	0	0	0	0.011	0	0	0	0.002	0	0.001	0	0	0.044	0	0	0	0.043	0
CD40_CD40LG	0.003	0	0	0	0	0	0.005	0.003	0	0.007	0	0.014	0	0	0	0	0	0	0	0.003	0	0	0	0	0	0	0	0.005	0	0	0	0	0	0	0	0	0	0	0	0.004	0	0.004	0.002	0	0	0	0	0	0.005
HLA-DRB1_OGN	0.475	0.475	0.476	0	0	0.475	0	0.475	0.475	0.479	0.479	0	0	0	0.479	0.48	0.475	0.475	0.476	0.476	0	0.477	0	0.488	0.48	0	0	0.476	0.476	0.516	0	0.476	0.476	0	0	0	0.475	0	0.476	0.484	0.475	0.478	0.407	0.407	0.408	0	0	0.407	0
NOTCH2_IL24	0.008	0.014	0	0	0	0	0	0.008	0	0	0	0.011	0	0	0	0	0.007	0.011	0	0.008	0.009	0	0	0	0	0	0	0	0	0	0	0	0.01	0	0.034	0	0	0	0	0.009	0.008	0	0.004	0.01	0	0	0	0	0
NOTCH2_DLL3	0.008	0.008	0	0	0	0	0	0.008	0	0	0	0	0	0	0	0	0	0	0	0	0	0.008	0.009	0	0	0	0	0	0	0	0	0.009	0	0	0	0	0	0	0	0.015	0	0	0.004	0.004	0	0	0	0	0
NOTCH1_DLL3	0.007	0.007	0	0	0	0	0	0.007	0	0	0	0	0	0	0	0	0	0	0	0	0	0.007	0.008	0	0	0	0	0	0	0	0	0.008	0	0	0	0	0	0	0	0.014	0	0	0.008	0.009	0	0	0	0	0
NOTCH4_DLL3	0.014	0.014	0	0	0	0	0	0.014	0	0	0	0	0	0	0	0	0	0	0	0	0	0.015	0.015	0	0	0	0	0	0	0	0	0.015	0	0	0	0	0	0	0	0.021	0	0	0.003	0.003	0	0	0	0	0
NOTCH1_WNT4	0.007	0	0	0.008	0	0.008	0	0	0.007	0	0	0	0	0	0	0	0.008	0	0	0	0	0	0.008	0	0	0	0	0	0	0	0	0	0	0	0	0	0.006	0	0	0	0	0	0.008	0	0	0.01	0	0.009	0
FZD6_WNT4	0.001	0	0	0.002	0	0.002	0	0	0.001	0	0	0	0	0	0	0	0.002	0	0	0	0	0	0.002	0	0	0	0	0	0	0	0	0	0	0	0	0	0	0	0	0	0	0	0.002	0	0	0.003	0	0.003	0
NOTCH1_JAG1	0.008	0	0	0.013	0	0.019	0.011	0.007	0.011	0	0.011	0.008	0	0	0	0.009	0.018	0	0.01	0.008	0	0.008	0	0	0	0	0	0	0.007	0.051	0	0.01	0.008	0.008	0	0	0.008	0	0.016	0.009	0.007	0.008	0.01	0	0	0.014	0	0.021	0.013
CD46_JAG1	0.058	0	0	0.062	0	0.069	0.061	0.057	0.061	0	0.06	0.058	0	0	0	0.059	0.068	0	0.059	0.058	0	0.058	0	0	0	0	0	0	0.057	0.101	0	0.06	0.058	0.058	0	0	0.057	0	0.066	0.059	0.057	0.058	0.04	0	0	0.045	0	0.051	0.043
CCL2_CCR2	0.044	0	0	0	0.002	0	0.003	0.001	0.005	0	0	0	0.003	0.008	0	0	0.001	0.001	0.008	0.005	0.02	0.009	0.008	0	0.022	0	0	0.001	0.001	0	0	0.001	0	0	0	0.009	0.009	0.011	0	0.009	0.008	0	0	0	0	0	0	0	0
CCL3_CCR1	0.004	0	0	0.003	0	0.001	0.004	0.001	0.006	0	0.01	0	0	0	0	0	0.001	0.004	0.005	0.007	0.005	0.002	0	0.008	0.006	0	0	0	0.008	0	0	0	0	0	0	0.01	0.01	0	0	0	0.003	0	0.003	0	0	0.002	0	0.001	0.003
CCL5_CCR1	0.007	0	0	0.006	0	0.005	0.007	0.005	0.01	0	0.013	0	0	0	0	0	0.005	0.008	0.009	0.01	0.009	0.005	0	0.011	0.01	0	0	0	0.011	0	0	0	0	0	0	0.014	0.013	0	0	0	0.007	0	0	0	0	0	0	0	0
CCL3L1_CCR1	0.003	0	0	0.002	0	0	0.003	0.001	0.006	0	0.009	0	0	0	0	0	0.001	0.004	0.004	0.006	0.005	0.001	0	0.007	0.006	0	0	0	0.007	0	0	0	0	0	0	0.009	0.009	0	0	0	0.003	0	0	0	0	0	0	0	0
CCL2_ACKR1	0	0	0	0	0	0	0	0	0	0	0	0	0	0	0	0.013	0	0	0	0	0	0	0	0.014	0	0	0	0.008	0	0	0	0	0	0	0	0	0	0	0	0	0.001	0.008	0	0	0	0	0	0	0
CCL5_ACKR1	0	0	0	0	0	0.005	0	0	0	0	0	0	0	0	0	0.017	0	0	0	0	0	0	0	0.018	0	0	0	0.012	0	0	0	0	0	0	0	0	0	0	0	0	0.005	0.013	0	0	0	0	0	0	0
PF4_ACKR1	0	0	0	0	0	0.005	0	0	0	0	0	0	0	0	0	0.017	0	0	0	0	0	0	0	0.019	0	0	0	0.013	0	0	0	0	0	0	0	0	0	0	0	0	0.005	0.013	0	0	0	0	0	0	0
CXCL1_ACKR1	0	0	0	0	0	0	0	0	0	0	0	0	0	0	0	0	0	0	0	0	0	0	0	0	0	0	0	0	0	0	0	0	0	0	0	0	0	0	0	0	0	0	0	0	0	0	0	0	0
CXCL8_ACKR1	0	0	0	0	0	0.005	0	0	0	0	0	0	0	0	0	0.017	0	0	0	0	0	0	0	0.018	0	0	0	0.012	0	0	0	0	0	0	0	0	0	0	0	0	0.005	0.013	0	0	0	0	0	0	0
CCL8_ACKR1	0	0	0	0	0	0	0	0	0	0	0	0	0	0	0	0	0	0	0	0	0	0	0	0	0	0	0	0	0	0	0	0	0	0	0	0	0	0	0	0	0	0	0	0	0	0	0	0	0
CCL2_CCR10	0.001	0.001	0	0	0.01	0.002	0	0.001	0.001	0	0	0.002	0.008	0.013	0	0	0.002	0	0.001	0	0.003	0	0.013	0	0	0.019	0	0.001	0.001	0	0.015	0	0	0	0	0	0.001	0	0.002	0.004	0.001	0.002	0	0	0	0	0	0	0
CCL3L1_DPP4	0.008	0	0	0.007	0	0.004	0.003	0.001	0.002	0	0	0.013	0	0	0	0.003	0.005	0	0.001	0.001	0.005	0.003	0	0	0.016	0	0.003	0	0	0	0	0	0	0	0	0	0	0	0.006	0.002	0.003	0	0	0	0	0	0	0	0
CXCL10_DPP4	0	0	0	0	0	0	0	0	0	0	0	0	0	0	0	0	0	0	0	0	0	0	0	0	0	0	0	0	0	0	0	0	0	0	0	0	0	0	0	0	0	0	0	0	0	0	0	0	0
CXCL2_DPP4	0.008	0	0	0.007	0	0.004	0.003	0.001	0.002	0	0	0.013	0	0	0	0.003	0.006	0	0.002	0.001	0.005	0.003	0	0	0.017	0	0.004	0	0	0	0	0	0	0	0	0	0.001	0	0.006	0.002	0.003	0	0	0	0	0	0	0	0
PF4_CXCR3	0.103	0	0	0	0	0.005	0.025	0.006	0.006	0	0	0.01	0	0	0	0	0.005	0.014	0	0	0.046	0.018	0	0	0.045	0	0	0	0.006	0	0	0	0	0	0	0.014	0.005	0	0	0.006	0.008	0	0	0	0	0	0	0	0
CXCL10_CXCR3	0	0	0	0	0	0	0	0	0	0	0	0	0	0	0	0	0	0	0	0	0	0	0	0	0	0	0	0	0	0	0	0	0	0	0	0	0	0	0	0	0	0	0	0	0	0	0	0	0
CXCL12_CXCR3	0.136	0	0	0	0	0.038	0.058	0.039	0.039	0	0	0.043	0	0	0	0	0.038	0.047	0	0	0.079	0.051	0	0	0.078	0	0	0	0.038	0	0	0	0	0	0	0.047	0.038	0	0	0.039	0.041	0	0.099	0	0	0	0	0.001	0.02
CXCL1_CXCR2	0	0	0	0	0	0	0	0	0	0	0	0	0	0	0	0	0	0	0	0	0	0	0	0	0	0	0	0	0	0	0	0	0	0	0	0	0	0	0	0	0	0	0	0	0	0	0	0	0
CXCL8_CXCR2	0	0	0	0	0	0	0	0	0.005	0	0	0	0	0	0	0	0	0.01	0.006	0.006	0	0.005	0	0	0	0	0	0	0.005	0	0	0	0	0	0	0.014	0.006	0	0	0	0.005	0	0	0	0	0	0	0	0
CXCL2_CXCR2	0	0	0	0	0	0	0	0	0.001	0	0	0	0	0	0	0	0	0.006	0.002	0.002	0	0.001	0	0	0	0	0	0	0.001	0	0	0	0	0	0	0.01	0.002	0	0	0	0.001	0	0	0	0	0	0	0	0
PPBP_CXCR2	0	0	0	0	0	0	0	0	0.003	0	0	0	0	0	0	0	0	0.007	0.003	0.003	0	0.002	0	0	0	0	0	0	0.002	0	0	0	0	0	0	0.011	0.003	0	0	0	0.002	0	0	0	0	0	0	0	0
CXCL3_CXCR2	0	0	0	0	0	0	0	0	0.002	0	0	0	0	0	0	0	0	0.006	0.002	0.002	0	0.001	0	0	0	0	0	0	0.001	0	0	0	0	0	0	0.01	0.002	0	0	0	0.001	0	0	0	0	0	0	0	0
SCT_VIPR1	0.279	0	0	0.28	0	0.281	0	0.279	0.285	0	0	0.287	0	0	0	0	0.28	0	0.286	0	0.284	0.279	0	0.285	0	0	0	0	0.285	0.284	0	0.279	0	0	0	0.288	0.285	0	0.282	0	0.289	0	0	0	0	0	0	0	0
LGALS9_LRP1	0.016	0.015	0	0.153	0.016	0.142	0.066	0.015	0.1	0	0.026	0.016	0.016	0.016	0	0	0.166	0.016	0.023	0.015	0.036	0.015	0.015	0.038	0	0.016	0	0.016	0.041	0.16	0	0.014	0	0	0.024	0	0.051	0.1	0.155	0.017	0.025	0.02	0.066	0.065	0	0.203	0.065	0.192	0.116
MDK_LRP1	0.005	0.004	0	0.143	0.005	0.132	0.056	0.004	0.09	0	0.016	0.006	0.006	0.005	0	0	0.156	0.005	0.012	0.005	0.025	0.004	0.005	0.028	0	0.005	0	0.006	0.031	0.15	0	0.004	0	0	0.014	0	0.041	0.09	0.145	0.007	0.015	0.01	0.059	0.058	0	0.196	0.059	0.186	0.11
LGALS9_CD47	0.073	0.071	0.09	0.086	0.021	0.064	0.089	0.056	0.049	0.222	0.063	0.072	0.033	0.023	0.087	0.048	0.066	0.101	0.04	0.043	0.067	0.096	0.028	0.034	0.072	0.024	0.076	0.078	0.087	0.054	0.029	0.046	0.092	0.027	0.086	0.083	0.043	0.057	0.038	0.088	0.068	0.098	0.123	0.121	0.14	0.135	0.071	0.114	0.139
SIRPA_CD47	0.06	0.058	0.077	0.072	0.008	0.051	0.075	0.043	0.036	0.209	0.049	0.059	0.02	0.01	0.073	0.034	0.053	0.088	0.027	0.029	0.054	0.083	0.014	0.021	0.059	0.011	0.062	0.064	0.074	0.04	0.015	0.033	0.078	0.014	0.073	0.07	0.029	0.044	0.025	0.074	0.055	0.085	0	0	0	0	0	0	0
LGALS9_PTPRK	0	0.015	0.015	0.032	0	0.027	0.016	0	0.02	0	0	0.016	0	0	0	0	0.029	0	0	0	0	0	0	0.027	0	0	0	0	0.014	0	0.021	0.014	0	0	0.035	0	0.014	0.025	0.03	0.023	0	0	0	0.065	0.065	0.082	0	0.077	0.066
WNT5A_PTPRK	0	0	0	0	0	0	0	0	0	0	0	0	0	0	0	0	0	0	0	0	0	0	0	0	0	0	0	0	0	0	0	0	0	0	0	0	0	0	0	0	0	0	0	0	0	0	0	0	0
LGALS9_SLC1A5	0.066	0.016	0.024	0.062	0.025	0.055	0.047	0.032	0.038	0.018	0.018	0.015	0.026	0.016	0	0.035	0.06	0.023	0.029	0.032	0.049	0.041	0.024	0	0.072	0.022	0.028	0.052	0.032	0.019	0.021	0.025	0.024	0.02	0	0	0.022	0.057	0.047	0.026	0.035	0.057	0.116	0.066	0.074	0.112	0.075	0.105	0.097
LGALS9_COLEC12	0	0	0	0.02	0	0.016	0	0	0	0	0	0	0	0	0	0	0.018	0	0	0	0.016	0	0	0.02	0	0	0	0	0	0.056	0	0	0	0	0	0	0.014	0	0.017	0	0	0	0	0	0	0.07	0	0.066	0
LGALS9_HAVCR2	0.014	0	0	0	0	0.014	0.019	0.015	0.018	0	0	0.016	0	0	0.018	0.016	0.014	0.043	0.019	0.019	0.018	0.018	0.015	0	0.019	0	0	0.015	0.026	0	0	0.016	0.015	0.015	0.019	0.023	0.021	0.025	0	0.019	0.031	0	0.064	0	0	0	0	0.064	0.068
LGALS9_SORL1	0.042	0.027	0.044	0.023	0	0.029	0.026	0.035	0.033	0	0.05	0.045	0	0	0.023	0.016	0.035	0.055	0.038	0.031	0.047	0.033	0	0.02	0.019	0	0.028	0.014	0.033	0	0	0.037	0.032	0.033	0.029	0.032	0.041	0.046	0.033	0.051	0.023	0	0.092	0.077	0.093	0.073	0	0.079	0.076
MDK_SORL1	0.031	0.017	0.033	0.013	0	0.019	0.015	0.024	0.023	0	0.04	0.034	0	0	0.013	0.006	0.024	0.045	0.027	0.02	0.037	0.022	0	0.01	0.009	0	0.018	0.004	0.022	0	0	0.027	0.022	0.022	0.019	0.021	0.031	0.036	0.022	0.04	0.013	0	0.085	0.07	0.087	0.066	0	0.073	0.069
PDGFA_PDGFRA	0	0	0	0.05	0	0.071	0.043	0.001	0.044	0.019	0	0	0	0	0	0	0.079	0.001	0.001	0	0	0.001	0	0.014	0	0.002	0.003	0	0	0.084	0	0	0	0	0	0	0.001	0.011	0.075	0.003	0.001	0	0	0	0	0	0	0	0
WNT4_FZD8	0	0	0	0.012	0	0.037	0.017	0.001	0.015	0	0	0	0	0.002	0	0	0.032	0.001	0	0	0	0.001	0	0	0	0	0	0	0	0.042	0	0	0	0	0	0	0.001	0.022	0.034	0	0.001	0	0	0	0	0	0	0	0
WNT5A_FZD1	0	0	0	0	0	0	0	0	0	0	0	0	0	0	0	0	0	0	0	0	0	0	0	0	0	0	0	0	0	0	0	0	0	0	0	0	0	0	0	0	0	0	0	0	0	0	0	0	0
WNT4_FZD1	0	0	0	0	0	0.002	0	0	0.002	0	0	0	0	0	0	0	0.001	0	0	0	0	0	0	0	0	0	0	0.001	0.001	0	0	0	0	0	0	0	0.001	0	0	0	0	0	0	0	0	0	0	0	0
WNT5A_FZD2	0	0	0	0	0	0	0	0	0	0	0	0	0	0	0	0	0	0	0	0	0	0	0	0	0	0	0	0	0	0	0	0	0	0	0	0	0	0	0	0	0	0	0	0	0	0	0	0	0
WNT5A_FZD5	0	0	0	0	0	0	0	0	0	0	0	0	0	0	0	0	0	0	0	0	0	0	0	0	0	0	0	0	0	0	0	0	0	0	0	0	0	0	0	0	0	0	0	0	0	0	0	0	0
WNT5A_ANTXR1	0	0	0	0	0	0	0	0	0	0	0	0	0	0	0	0	0	0	0	0	0	0	0	0	0	0	0	0	0	0	0	0	0	0	0	0	0	0	0	0	0	0	0	0	0	0	0	0	0
GDF11_ANTXR1	0.001	0	0	0.04	0	0.024	0.018	0	0.02	0	0	0	0	0	0	0	0.025	0	0	0	0	0	0	0	0	0	0	0	0.001	0.03	0	0	0	0	0	0	0.001	0	0.029	0	0	0	0.01	0	0	0.05	0	0.033	0.027
WNT5A_ROR2	0	0	0	0	0	0	0	0	0	0	0	0	0	0	0	0	0	0	0	0	0	0	0	0	0	0	0	0	0	0	0	0	0	0	0	0	0	0	0	0	0	0	0	0	0	0	0	0	0
WNT5A_FZD3	0	0	0	0	0	0	0	0	0	0	0	0	0	0	0	0	0	0	0	0	0	0	0	0	0	0	0	0	0	0	0	0	0	0	0	0	0	0	0	0	0	0	0	0	0	0	0	0	0
TNFRSF10A_TNFSF10	0	0	0	0	0	0	0	0	0	0	0	0	0	0	0	0	0	0	0	0	0	0	0	0	0	0	0	0	0	0	0	0	0	0	0	0	0	0	0	0	0	0	0	0	0	0	0	0	0
TNFRSF11B_TNFSF10	0.003	0.004	0.005	0.053	0	0.06	0.042	0.007	0.047	0	0	0.009	0	0	0	0.003	0.079	0.018	0.018	0.012	0.003	0.002	0.002	0.007	0.014	0	0.003	0.001	0.087	0.016	0.004	0.005	0.002	0	0.006	0.019	0.04	0.044	0.06	0.002	0.02	0.007	0	0	0	0	0	0	0
TNFRSF10B_TNFSF10	0.003	0.004	0.005	0.053	0	0.06	0.042	0.007	0.047	0	0	0.009	0	0	0	0.003	0.079	0.018	0.018	0.012	0.003	0.002	0.002	0.007	0.014	0	0.003	0.001	0.087	0.016	0.004	0.005	0.002	0	0.006	0.019	0.04	0.044	0.06	0.002	0.02	0.007	0.005	0.006	0.008	0.056	0	0.063	0.045
TNFRSF10C_TNFSF10	0	0	0	0	0	0	0	0	0	0	0	0	0	0	0	0	0	0	0	0	0	0	0	0	0	0	0	0	0	0	0	0	0	0	0	0	0	0	0	0	0	0	0	0	0	0	0	0	0
FGFR1_NCAM1	0	0	0	0	0	0	0	0	0	0	0	0	0	0	0	0	0	0	0	0	0	0	0	0	0	0	0	0	0	0	0	0	0	0	0	0	0	0	0	0	0	0	0	0	0	0.003	0	0.003	0
FGFR1_FGF7	0	0	0	0	0	0	0	0	0	0	0	0	0	0	0	0	0	0	0	0	0	0	0	0	0	0	0	0	0	0	0	0	0	0	0	0	0	0	0	0	0	0	0.002	0	0	0.069	0	0.071	0.023
FGFR1_KL	0	0	0	0	0	0	0	0	0	0	0	0	0	0	0	0	0	0	0	0	0	0	0	0	0	0	0	0	0	0	0	0	0	0	0	0	0	0	0	0	0	0	0	0	0	0.003	0	0.003	0
FGFR2_EPHA4	0	0	0	0	0	0	0	0	0	0	0	0	0	0	0	0	0	0	0	0	0	0	0	0	0	0	0	0	0	0	0	0	0	0	0	0	0	0	0	0	0	0	0	0	0	0	0	0	0
EFNA1_EPHA4	0.001	0	0	0	0	0.002	0	0	0	0	0	0.003	0	0	0	0	0.001	0.005	0.001	0	0	0.002	0	0	0	0	0	0	0	0	0	0	0	0	0.006	0	0	0	0.002	0.005	0	0	0.008	0	0	0	0	0.009	0
EFNA3_EPHA4	0.001	0	0	0	0	0.002	0	0	0	0	0	0.003	0	0	0	0	0.001	0.005	0.001	0	0	0.002	0	0	0	0	0	0	0	0	0	0	0	0	0.006	0	0	0	0.002	0.005	0	0	0.002	0	0	0	0	0.003	0
EFNA4_EPHA4	0.008	0	0	0	0	0.009	0	0	0	0	0	0.01	0	0	0	0	0.008	0.012	0.008	0	0	0.009	0	0	0	0	0	0	0	0	0	0	0	0	0.012	0	0	0	0.009	0.012	0	0	0.002	0	0	0	0	0.003	0
EFNA5_EPHA4	0	0	0	0	0	0	0	0	0	0	0	0	0	0	0	0	0	0	0	0	0	0	0	0	0	0	0	0	0	0	0	0	0	0	0	0	0	0	0	0	0	0	0.001	0	0	0	0	0.002	0
FGFR3_EPHA4	0.001	0	0	0	0	0.002	0	0	0	0	0	0.003	0	0	0	0	0.001	0.005	0.001	0	0	0.002	0	0	0	0	0	0	0	0	0	0	0	0	0.006	0	0	0	0.002	0.005	0	0	0	0	0	0	0	0	0
FGFR2_CD83	0	0	0	0	0	0	0	0	0	0	0	0	0	0	0	0	0	0	0	0	0	0	0	0	0	0	0	0	0	0	0	0	0	0	0	0	0	0	0	0	0	0	0	0	0	0	0	0	0
FGFR2_NECTIN1	0	0	0	0	0	0	0	0	0	0	0	0	0	0	0	0	0	0	0	0	0	0	0	0	0	0	0	0	0	0	0	0	0	0	0	0	0	0	0	0	0	0	0	0	0	0	0	0	0
FGFR3_NECTIN1	0.013	0	0	0	0	0.002	0.005	0.006	0	0	0.005	0.003	0	0	0.005	0.003	0.002	0.001	0.003	0.002	0.003	0.008	0	0	0.006	0	0.015	0.016	0.004	0	0	0.005	0	0	0	0	0.003	0	0	0.007	0.002	0.044	0	0	0	0	0	0	0
CD96_NECTIN1	0.014	0	0	0	0	0.002	0.005	0.006	0	0	0.005	0.003	0	0	0.005	0.003	0.002	0.002	0.003	0.002	0.003	0.008	0	0	0.006	0	0.015	0.016	0.004	0	0	0.005	0	0	0	0	0.003	0	0	0.007	0.002	0.045	0.027	0	0	0	0	0.015	0.019
FGFR2_XPR1	0	0	0	0	0	0	0	0	0	0	0	0	0	0	0	0	0	0	0	0	0	0	0	0	0	0	0	0	0	0	0	0	0	0	0	0	0	0	0	0	0	0	0	0	0	0	0	0	0
WNT4_SMO	0	0.001	0	0.014	0	0.01	0.005	0.003	0.002	0	0.005	0	0	0	0	0	0.009	0	0	0	0	0.001	0	0	0	0	0	0	0	0	0	0.001	0.003	0	0	0	0	0	0.002	0	0.001	0	0	0	0	0	0	0	0
BMP2_SMO	0	0	0	0	0	0	0	0	0	0	0	0	0	0	0	0	0	0	0	0	0	0	0	0	0	0	0	0	0	0	0	0	0	0	0	0	0	0	0	0	0	0	0	0.002	0	0.015	0	0.011	0.007
DLL1_NOTCH2	0	0	0	0	0	0	0	0	0	0	0	0	0	0	0	0	0	0	0	0	0	0	0	0	0	0	0	0	0	0	0	0	0	0	0	0	0	0	0	0	0	0	0	0	0	0	0	0	0
JAG1_NOTCH2	0.009	0.005	0.003	0.009	0	0.008	0.004	0.004	0.013	0	0.01	0.004	0	0	0.006	0.01	0.011	0.006	0.008	0.005	0.01	0.004	0	0	0.023	0	0.004	0.003	0.02	0.022	0	0.003	0.003	0.006	0.007	0.02	0.013	0.023	0.016	0.01	0.008	0.006	0	0	0	0	0	0	0
DLL1_NOTCH4	0	0	0	0	0	0	0	0	0	0	0	0	0	0	0	0	0	0	0	0	0	0	0	0	0	0	0	0	0	0	0	0	0	0	0	0	0	0	0	0	0	0	0	0	0	0	0	0	0
JAG1_NOTCH4	0.015	0.004	0.003	0.003	0	0.002	0.006	0.002	0.002	0	0	0	0	0	0	0	0.003	0.003	0.002	0	0.023	0.003	0	0	0	0	0	0	0.007	0.007	0	0	0	0	0	0	0.002	0	0.003	0.003	0.002	0.005	0	0	0	0	0	0	0
DLL1_NOTCH3	0	0	0	0	0	0	0	0	0	0	0	0	0	0	0	0	0	0	0	0	0	0	0	0	0	0	0	0	0	0	0	0	0	0	0	0	0	0	0	0	0	0	0	0	0	0	0	0	0
JAG1_NOTCH3	0.002	0	0	0.005	0	0.003	0	0	0.004	0	0	0	0	0	0	0	0.004	0	0	0	0	0	0	0	0	0	0	0	0	0	0	0	0	0	0	0	0	0	0.005	0	0	0	0	0	0	0	0	0	0
SCGB3A1_NOTCH3	0	0	0	0	0	0	0	0	0	0	0	0	0	0	0	0	0	0	0	0	0	0	0	0	0	0	0	0	0	0	0	0	0	0	0	0	0	0	0	0	0	0	0	0	0	0	0	0	0
DLL3_NOTCH3	0.001	0	0	0.003	0	0.002	0	0	0.003	0	0	0	0	0	0	0	0.003	0	0	0	0	0	0	0	0	0	0	0	0	0	0	0	0	0	0	0	0	0	0.004	0	0	0	0.001	0	0	0.004	0	0.002	0
PLXNB2_PTN	0	0	0	0.059	0	0.04	0.035	0	0.037	0	0	0	0	0	0	0	0.041	0	0	0	0	0	0	0	0	0	0	0	0	0.044	0	0	0	0	0	0	0	0	0.035	0	0	0	0	0	0	0.049	0	0.03	0.026
PLXNB2_SEMA4D	0.055	0.046	0.05	0.035	0	0.035	0.053	0.05	0.043	0.137	0.061	0.101	0.035	0.035	0	0.052	0.035	0.083	0.057	0.044	0.068	0.064	0	0	0.063	0	0.066	0.039	0.057	0	0.037	0.039	0.04	0.035	0.071	0	0.057	0.055	0.035	0.068	0.05	0.049	0.045	0.036	0.041	0.025	0	0.025	0.043
PLXNB1_SEMA4D	0.022	0.014	0.018	0.002	0	0.002	0.02	0.017	0.011	0.105	0.028	0.069	0.003	0.002	0	0.02	0.002	0.05	0.025	0.012	0.035	0.031	0	0	0.03	0	0.034	0.007	0.024	0	0.004	0.007	0.008	0.002	0.038	0	0.025	0.022	0.002	0.036	0.017	0.016	0.024	0.015	0.02	0.004	0	0.004	0.022
CD72_SEMA4D	0.027	0.018	0.023	0.007	0	0.007	0.025	0.022	0.016	0.109	0.033	0.073	0.008	0.007	0	0.024	0.007	0.055	0.03	0.016	0.04	0.036	0	0	0.035	0	0.038	0.011	0.029	0	0.009	0.011	0.012	0.007	0.043	0	0.029	0.027	0.007	0.04	0.022	0.021	0.053	0.044	0.049	0.033	0	0.033	0.051
LTA_TNFRSF14	0.03	0.048	0.025	0.028	0.005	0.032	0.036	0.023	0.035	0.02	0.014	0.069	0.014	0.011	0.011	0.018	0.038	0.06	0.016	0.01	0.034	0.016	0.006	0	0.044	0.014	0.016	0.008	0.066	0.007	0.005	0.008	0.022	0.011	0.089	0.056	0.038	0	0.027	0.023	0.029	0.014	0	0	0	0	0	0	0
TNFSF13_TNFRSF14	0.03	0.047	0.025	0.028	0.005	0.032	0.035	0.022	0.034	0.02	0.014	0.069	0.013	0.01	0.01	0.017	0.038	0.059	0.015	0.009	0.033	0.016	0.006	0	0.044	0.013	0.015	0.007	0.065	0.006	0.005	0.007	0.022	0.011	0.089	0.056	0.038	0	0.026	0.022	0.028	0.014	0.03	0.047	0.025	0.028	0.005	0.032	0.035
TNFSF14_TNFRSF14	0.03	0.047	0.025	0.027	0.005	0.031	0.035	0.022	0.034	0.019	0.013	0.069	0.013	0.01	0.01	0.017	0.037	0.059	0.015	0.009	0.033	0.015	0.005	0	0.043	0.013	0.015	0.007	0.065	0.006	0.004	0.007	0.021	0.011	0.089	0.055	0.038	0	0.026	0.022	0.028	0.014	0.03	0.047	0.025	0.028	0.005	0.032	0.035
CD160_TNFRSF14	0	0	0	0	0	0	0	0	0	0	0	0	0	0	0	0	0	0	0	0	0	0	0	0	0	0	0	0	0	0	0	0	0	0	0	0	0	0	0	0	0	0	0.029	0.047	0.024	0.027	0.004	0.031	0.035
MIF_TNFRSF14	0.053	0.07	0.048	0.05	0.028	0.055	0.058	0.045	0.057	0.043	0.037	0.092	0.036	0.033	0.033	0.04	0.061	0.082	0.038	0.032	0.056	0.039	0.029	0	0.067	0.036	0.038	0.03	0.088	0.029	0.028	0.03	0.045	0.034	0.112	0.079	0.061	0	0.049	0.045	0.051	0.037	0.054	0.072	0.049	0.052	0.029	0.056	0.06
BTLA_TNFRSF14	0.036	0.053	0.031	0.033	0.011	0.037	0.041	0.028	0.04	0.025	0.02	0.075	0.019	0.016	0.016	0.023	0.043	0.065	0.021	0.015	0.039	0.022	0.012	0	0.05	0.019	0.021	0.013	0.071	0.012	0.011	0.013	0.028	0.017	0.095	0.062	0.044	0	0.032	0.028	0.034	0.02	0.029	0.047	0.024	0.027	0.004	0.031	0.035
TNFSF13_TNFRSF17	0.012	0	0	0	0.086	0	0	0.001	0	0	0	0	0.074	0.062	0	0	0.001	0	0	0	0.01	0.005	0.064	0	0	0.051	0	0.001	0.001	0	0.067	0	0	0.004	0.006	0	0	0	0	0.002	0.002	0	0.012	0	0	0	0.086	0	0
CD70_TNFRSF17	0	0	0	0	0	0	0	0	0	0	0	0	0	0	0	0	0	0	0	0	0	0	0	0	0	0	0	0	0	0	0	0	0	0	0	0	0	0	0	0	0	0	0.011	0	0	0	0.085	0	0
TNFSF10_TNFRSF10D	0	0.003	0.004	0	0	0.003	0	0.003	0.004	0	0	0	0	0	0	0	0.003	0	0.005	0.003	0	0	0	0	0	0	0	0	0.003	0	0	0.003	0	0	0	0	0.004	0	0	0.004	0.003	0	0	0.004	0.005	0	0	0.004	0
MIF_TNFRSF10D	0	0.025	0.025	0	0	0.024	0	0.025	0.026	0	0	0	0	0	0	0	0.024	0	0.026	0.025	0	0	0	0	0	0	0	0	0.024	0	0	0.025	0	0	0	0	0.026	0	0	0.025	0.024	0	0	0.026	0.027	0	0	0.026	0
EFNA1_EPHA1	0.001	0.001	0.002	0	0	0.001	0.003	0.001	0.002	0	0	0	0	0	0	0	0	0	0.001	0.001	0	0.002	0	0	0	0	0	0	0.001	0	0	0	0	0	0	0	0.001	0.011	0	0	0.001	0	0.009	0.008	0.009	0	0	0.008	0.01
EFNA1_EPHA2	0.012	0	0	0	0	0.001	0	0	0.001	0	0	0	0	0	0	0	0.002	0	0	0	0.011	0	0	0	0	0	0	0	0	0.011	0	0	0	0	0	0	0	0	0	0.002	0	0	0.019	0	0	0	0	0.009	0
TNFRSF11B_TNFSF11	0	0	0	0	0	0.001	0	0	0.001	0	0	0.003	0	0	0	0	0.001	0	0	0	0	0	0	0	0	0	0	0	0	0	0	0	0	0	0	0	0	0	0	0	0.001	0	0	0	0	0	0	0	0
POMC_MC1R	0.022	0	0	0	0	0.023	0.027	0	0	0	0	0	0	0	0	0	0.023	0.025	0.024	0.023	0.024	0.023	0	0	0	0	0	0	0	0	0	0	0.024	0	0	0	0.022	0	0	0.023	0	0	0.008	0	0	0	0	0.008	0.012
SCGB3A1_MARCO	0	0	0	0	0	0	0	0	0	0	0	0	0	0	0	0	0	0	0	0	0	0	0	0	0	0	0	0	0	0	0	0	0	0	0	0	0	0	0	0	0	0	0	0	0	0	0	0	0
CCR2_CCL8	0	0	0	0	0	0.046	0	0	0.045	0	0	0	0	0	0	0	0.049	0	0	0	0	0	0	0	0	0	0	0	0	0	0	0	0	0	0.049	0	0.043	0	0	0	0	0	0	0	0	0	0	0	0
CCR1_CCL8	0	0	0	0	0	0.006	0	0	0.004	0	0	0	0	0	0	0	0.008	0	0	0	0	0	0	0	0	0	0	0	0	0	0	0	0	0	0.008	0	0.003	0	0	0	0	0	0	0	0	0	0	0	0
CCR5_CCL8	0	0	0	0	0	0.008	0	0	0.006	0	0	0	0	0	0	0	0.01	0	0	0	0	0	0	0	0	0	0	0	0	0	0	0	0	0	0.01	0	0.005	0	0	0	0	0	0	0	0	0	0	0	0
CCR2_CCL13	0	0	0	0.061	0	0.047	0.046	0.044	0.047	0	0	0	0	0	0	0	0.054	0	0	0	0	0.044	0	0	0	0	0	0	0	0	0	0	0	0	0	0	0.043	0.054	0.047	0	0	0	0	0	0	0	0	0	0
CCR1_CCL13	0	0	0	0.021	0	0.007	0.005	0.003	0.007	0	0	0	0	0	0	0	0.014	0	0	0	0	0.003	0	0	0	0	0	0	0	0	0	0	0	0	0	0	0.003	0.014	0.007	0	0	0	0	0	0	0	0	0	0
CCR10_CCL28	0.002	0.005	0.011	0.004	0	0.004	0.006	0.007	0.005	0	0.014	0.005	0	0	0.01	0	0.007	0.004	0	0.005	0.005	0.004	0	0	0	0	0	0.002	0.001	0.006	0	0.004	0.005	0	0.006	0.01	0.001	0	0.007	0.004	0.002	0.003	0.001	0.004	0.01	0.004	0	0.003	0.005
CCR2_CCL26	0	0	0	0	0	0.044	0	0	0	0	0	0	0	0	0	0	0.044	0	0	0	0	0	0	0	0	0	0	0	0	0	0	0	0	0	0	0	0.044	0	0	0	0	0	0	0	0	0	0	0	0
CCR1_CCL26	0	0	0	0	0	0.004	0	0	0	0	0	0	0	0	0	0	0.004	0	0	0	0	0	0	0	0	0	0	0	0	0	0	0	0	0	0	0	0.003	0	0	0	0	0	0	0	0	0	0	0	0
CCR1_CCL23	0	0	0	0	0	0	0	0.005	0	0	0.007	0.004	0	0	0	0	0.003	0.004	0.012	0.027	0	0	0	0.01	0	0	0.009	0.003	0.003	0	0	0.016	0	0	0	0	0.004	0.025	0	0.005	0.003	0	0	0	0	0	0	0	0
IDE_CCL23	0	0	0	0	0	0	0	0.006	0	0	0.009	0.006	0	0	0	0	0.004	0.005	0.014	0.029	0	0	0	0.011	0	0	0.01	0.005	0.005	0	0	0.017	0	0	0	0	0.006	0.026	0	0.006	0.005	0	0	0	0	0	0	0	0
PODXL_SELL	0.171	0.018	0.118	0	0	0.002	0.08	0.124	0.084	0.005	0.145	0.112	0	0	0	0.006	0.003	0.067	0.097	0.06	0.141	0.164	0.002	0	0.09	0	0.046	0	0.016	0.006	0	0.053	0.039	0.011	0.217	0.159	0.147	0.044	0	0.038	0.112	0.002	0.172	0.019	0.119	0	0	0.003	0.081
CXCL12_CXCR4	0.19	0.443	0.316	0.04	0.05	0.042	0.117	0.084	0.075	0.056	0.068	0.325	0.048	0.051	0.061	0.049	0.041	0.288	0.143	0.135	0.175	0.216	0.044	0	0.239	0.044	0.339	0.04	0.111	0	0.138	0.069	0.421	0.103	0.536	0.14	0.096	0.131	0.042	0.166	0.229	0	0.152	0.405	0.278	0.002	0.012	0.004	0.08
AVP_OXTR	0.001	0	0	0	0	0	0	0.001	0.001	0.005	0	0	0	0	0	0.003	0.001	0.001	0	0	0	0.001	0	0	0	0	0	0	0.001	0	0	0	0	0	0	0	0	0	0	0	0	0	0	0	0	0	0	0	0
OXT_OXTR	0.001	0	0	0	0	0	0	0.001	0.001	0.005	0	0	0	0	0	0.003	0.001	0.001	0	0	0	0.001	0	0	0	0	0	0	0.001	0	0	0	0	0	0	0	0	0	0	0	0	0	0.002	0	0	0	0	0	0
EREG_EGFR	0.001	0	0	0.019	0	0.021	0.023	0	0.014	0	0	0	0	0	0	0	0.026	0.002	0	0	0	0.001	0	0.008	0	0	0	0	0.001	0.027	0	0	0	0	0	0	0.001	0	0.025	0	0	0	0	0	0	0	0	0	0
NRG1_LSR	0	0	0	0	0	0	0	0	0	0	0	0	0	0	0	0	0	0	0	0	0	0	0	0	0	0	0	0	0	0	0	0	0	0	0	0	0	0	0	0	0	0	0	0	0	0	0	0	0
NRG1_NETO2	0	0	0	0	0	0	0	0	0	0	0	0	0	0	0	0	0	0	0	0	0	0	0	0	0	0	0	0	0	0	0	0	0	0	0	0	0	0	0	0	0	0	0	0	0	0	0	0	0
NRG1_MS4A4A	0	0	0	0	0	0	0	0	0	0	0	0	0	0	0	0	0	0	0	0	0	0	0	0	0	0	0	0	0	0	0	0	0	0	0	0	0	0	0	0	0	0	0	0	0	0	0	0	0
NRG1_LGR4	0	0	0	0	0	0	0	0	0	0	0	0	0	0	0	0	0	0	0	0	0	0	0	0	0	0	0	0	0	0	0	0	0	0	0	0	0	0	0	0	0	0	0	0	0	0	0	0	0
RSPO1_LGR4	0	0	0	0	0	0	0	0	0	0	0	0	0	0	0	0	0	0	0	0	0	0	0	0	0	0	0	0	0	0	0	0	0	0	0	0	0	0	0	0	0	0	0	0	0	0	0	0	0
RSPO1_LGR6	0	0	0	0	0	0	0	0	0	0	0	0	0	0	0	0	0	0	0	0	0	0	0	0	0	0	0	0	0	0	0	0	0	0	0	0	0	0	0	0	0	0	0	0	0	0	0	0	0
RSPO3_LGR6	0	0	0	0	0	0	0	0	0	0	0	0	0	0	0	0	0	0	0	0	0	0	0	0	0	0	0	0	0	0	0	0	0	0	0	0	0	0	0	0	0	0	0	0	0	0	0	0	0
TNFSF11_TNFRSF11A	0	0	0	0	0	0	0	0	0	0	0	0	0	0	0	0	0	0	0	0	0	0	0	0	0	0	0	0	0	0	0	0	0	0	0	0	0	0	0	0	0	0	0	0	0	0	0	0	0
NCR3_BAG6	0.023	0.022	0.023	0.019	0.003	0.014	0.028	0.021	0.017	0.015	0.013	0.022	0.003	0.003	0.029	0.014	0.015	0.014	0.032	0.02	0.025	0.026	0.002	0.014	0.03	0	0.028	0.022	0.024	0.027	0.004	0.014	0.026	0.022	0.022	0.028	0.021	0.022	0.016	0.029	0.024	0.033	0	0	0	0	0	0	0
NCR3_NCR3LG1	0	0	0	0	0	0	0	0.001	0.002	0	0	0	0	0	0	0	0.001	0	0.002	0.002	0	0.001	0	0	0	0	0	0.001	0.001	0	0	0.003	0	0	0	0	0.001	0	0	0.003	0.002	0.002	0	0	0	0	0	0	0
PLD2_ARF1	0.183	0.134	0.115	0.105	0.035	0.106	0.143	0.128	0.11	0.482	0.084	0.1	0.028	0.033	0.032	0.054	0.1	0.142	0.136	0.102	0.116	0.19	0.042	0.231	0.155	0.024	0.11	0.126	0.119	0.076	0.064	0.095	0.133	0.033	0.084	0.103	0.121	0.056	0.072	0.072	0.13	0.092	0.182	0.133	0.114	0.104	0.034	0.105	0.142
SEMA4A_PLXND1	0.016	0.018	0.028	0.037	0	0.046	0.034	0.02	0.035	0	0.02	0.01	0	0	0	0.018	0.055	0.021	0.023	0.033	0.023	0.013	0	0.021	0	0	0.013	0.02	0.016	0.013	0.011	0.024	0.016	0.011	0.013	0	0.022	0.029	0.072	0.037	0.018	0.046	0.009	0.011	0.022	0.031	0	0.04	0.028
EPHB6_EFNB1	0.004	0.005	0.005	0.021	0	0.03	0.021	0.004	0.019	0.021	0	0.004	0	0	0	0	0.037	0	0.005	0.003	0.007	0.005	0	0	0	0	0	0.003	0.006	0.024	0	0.003	0	0	0	0	0.005	0	0.038	0.004	0.016	0.004	0.01	0.011	0.011	0.026	0	0.036	0.027
EPHB2_EFNB1	0	0	0	0	0	0	0	0	0	0	0	0	0	0	0	0	0	0	0	0	0	0	0	0	0	0	0	0	0	0	0	0	0	0	0	0	0	0	0	0	0	0	0	0	0	0	0	0	0
EPHB3_EFNB1	0	0	0	0	0	0	0	0	0	0	0	0	0	0	0	0	0	0	0	0	0	0	0	0	0	0	0	0	0	0	0	0	0	0	0	0	0	0	0	0	0	0	0	0	0	0	0	0	0
EPHB4_EFNB1	0	0	0	0	0	0	0	0	0	0	0	0	0	0	0	0	0	0	0	0	0	0	0	0	0	0	0	0	0	0	0	0	0	0	0	0	0	0	0	0	0	0	0	0	0	0	0	0	0
EPHB1_EFNB1	0.056	0.057	0.058	0.073	0	0.082	0.073	0.056	0.071	0.073	0	0.056	0	0	0	0	0.09	0	0.057	0.056	0.059	0.057	0	0	0	0	0	0.055	0.058	0.076	0	0.055	0	0	0	0	0.057	0	0.09	0.056	0.068	0.056	0	0	0	0	0	0	0
EPHA4_EFNB1	0.002	0.003	0.003	0.018	0	0.028	0.019	0.001	0.016	0.019	0	0.002	0	0	0	0	0.035	0	0.003	0.001	0.005	0.003	0	0	0	0	0	0.001	0.004	0.021	0	0.001	0	0	0	0	0.002	0	0.036	0.002	0.014	0.002	0	0	0	0	0	0	0
EPHB6_EFNB3	0	0	0	0.006	0	0.005	0	0	0.005	0	0	0	0	0	0	0	0.005	0	0	0	0	0	0	0	0	0	0	0	0	0.018	0	0	0	0	0	0	0	0	0	0	0	0	0	0	0	0.012	0	0.011	0
EPHB2_EFNB3	0	0	0	0	0	0	0	0	0	0	0	0	0	0	0	0	0	0	0	0	0	0	0	0	0	0	0	0	0	0	0	0	0	0	0	0	0	0	0	0	0	0	0	0	0	0	0	0	0
EPHB3_EFNB3	0	0	0	0	0	0	0	0	0	0	0	0	0	0	0	0	0	0	0	0	0	0	0	0	0	0	0	0	0	0	0	0	0	0	0	0	0	0	0	0	0	0	0	0	0	0	0	0	0
EPHB4_EFNB3	0	0	0	0	0	0	0	0	0	0	0	0	0	0	0	0	0	0	0	0	0	0	0	0	0	0	0	0	0	0	0	0	0	0	0	0	0	0	0	0	0	0	0	0	0	0	0	0	0
EPHB1_EFNB3	0	0	0	0.058	0	0.057	0	0	0.057	0	0	0	0	0	0	0	0.058	0	0	0	0	0	0	0	0	0	0	0	0	0.071	0	0	0	0	0	0	0	0	0	0	0	0	0	0	0	0	0	0	0
EPHA4_EFNB3	0	0	0	0.003	0	0.003	0	0	0.003	0	0	0	0	0	0	0	0.003	0	0	0	0	0	0	0	0	0	0	0	0	0.016	0	0	0	0	0	0	0	0	0	0	0	0	0	0	0	0	0	0	0
EPHB2_EFNA5	0	0	0	0	0	0	0	0	0	0	0	0	0	0	0	0	0	0	0	0	0	0	0	0	0	0	0	0	0	0	0	0	0	0	0	0	0	0	0	0	0	0	0	0	0	0	0	0	0
EPHA1_EFNA5	0	0.002	0	0.005	0	0.006	0.003	0.001	0.005	0	0	0	0	0	0	0	0.006	0.003	0	0	0	0	0	0	0	0	0	0	0	0.006	0	0	0	0	0	0	0.001	0	0.004	0	0.001	0	0	0.001	0	0.005	0	0.006	0.003
EPHA2_EFNA5	0	0.012	0	0.016	0	0.016	0.014	0.011	0.016	0	0	0	0	0	0	0	0.016	0.013	0	0	0	0	0	0	0	0	0	0	0	0.016	0	0	0	0	0	0	0.011	0	0.015	0	0.012	0	0	0	0	0	0	0	0
EPHA1_EFNA3	0.001	0.002	0	0	0	0.001	0.003	0.003	0	0	0.005	0	0	0	0	0	0.001	0.001	0	0	0	0.001	0.002	0	0	0	0	0.001	0.001	0	0	0.001	0	0	0	0	0.001	0	0	0.002	0	0	0.001	0.002	0	0	0	0.001	0.003
EPHA2_EFNA3	0.012	0.013	0	0	0	0.011	0.014	0.013	0	0	0.015	0	0	0	0	0	0.011	0.012	0	0	0	0.012	0.013	0	0	0	0	0.012	0.011	0	0	0.012	0	0	0	0	0.012	0	0	0.013	0	0	0	0	0	0	0	0	0
EPHA1_EFNA4	0.008	0.002	0.005	0.005	0	0.01	0.013	0.005	0.004	0	0	0.003	0	0	0	0	0.009	0.006	0.004	0	0.005	0.005	0	0	0	0	0.006	0.001	0.004	0.006	0	0.001	0.002	0	0.006	0	0.003	0	0.006	0.003	0.002	0.002	0.008	0.002	0.005	0.005	0	0.009	0.013
EPHA2_EFNA4	0.018	0.013	0.015	0.016	0	0.02	0.023	0.015	0.014	0	0	0.014	0	0	0	0	0.019	0.017	0.014	0	0.016	0.016	0	0	0	0	0.017	0.011	0.014	0.016	0	0.012	0.013	0	0.016	0	0.014	0	0.017	0.014	0.012	0.013	0	0	0	0	0	0	0
CSF1_SIRPA	0.001	0	0	0	0	0.001	0	0.002	0.007	0	0.009	0	0	0.004	0.01	0	0	0	0.016	0.008	0.003	0.002	0	0.008	0	0	0.006	0	0.004	0	0	0.002	0	0.009	0	0.037	0.018	0.012	0	0	0.011	0	0	0	0	0	0	0	0
CSF1_CELSR3	0.002	0	0	0	0	0.001	0	0.001	0	0	0	0	0	0	0	0	0.001	0	0.002	0.001	0	0.001	0	0	0	0	0	0	0	0	0	0	0	0	0	0	0.001	0.012	0	0.002	0.002	0.002	0	0	0	0	0	0	0
CEACAM1_CD209	0	0	0	0	0	0	0	0	0	0	0	0	0	0	0	0	0	0	0	0	0	0	0	0	0	0	0	0	0	0	0	0	0	0	0	0	0	0	0	0	0	0	0.004	0.006	0.007	0	0	0.003	0.004
ICAM3_CD209	0.039	0.041	0.043	0	0	0.038	0.039	0.039	0.038	0	0.041	0.041	0	0	0	0	0.039	0.041	0.038	0.038	0.039	0.04	0	0	0.042	0	0.04	0.04	0.04	0	0.041	0.043	0.038	0.04	0.058	0	0.04	0.048	0.043	0.044	0.039	0.04	0.018	0.021	0.022	0	0	0.017	0.019
CEACAM1_CEACAM6	0	0	0	0	0	0	0	0	0	0	0	0	0	0	0	0	0	0	0	0	0	0	0	0	0	0	0	0	0	0	0	0	0	0	0	0	0	0	0	0	0	0	0.002	0	0.003	0	0	0	0
CEACAM8_CEACAM6	0	0	0	0	0	0	0	0	0	0	0	0	0	0	0	0	0	0	0	0	0	0	0	0	0	0	0	0	0	0	0	0	0	0	0	0	0	0	0	0	0	0	0	0	0	0	0	0	0
CEACAM6_CEACAM6	0.001	0	0.002	0	0	0	0	0	0	0	0	0	0	0	0.112	0	0	0	0	0.002	0	0	0	0	0	0	0	0	0	0	0	0.011	0	0.018	0	0	0	0	0	0	0.001	0.002	0	0	0	0	0	0	0
CEACAM1_CEACAM8	0	0	0	0	0	0	0	0	0	0	0	0	0	0	0	0	0	0	0	0	0	0	0	0	0	0	0	0	0	0	0	0	0	0	0	0	0	0	0	0	0	0	0	0	0	0	0	0.002	0
TBXA2R_GHRL	0	0	0	0	0	0	0	0	0	0	0	0	0	0	0	0	0	0	0	0	0	0	0	0	0	0	0	0	0	0	0	0	0	0	0	0	0	0	0	0	0	0	0.016	0	0	0	0	0.009	0.014
PTGIR_GHRL	0.009	0	0	0	0	0.002	0.007	0.003	0.005	0	0	0.004	0	0	0	0	0	0	0.005	0.006	0.004	0.004	0	0	0	0	0	0.002	0.002	0	0	0.005	0	0.004	0	0	0.003	0	0	0	0.007	0	0.01	0	0	0	0	0.003	0.008
TNFSF12_TNFRSF25	0	0	0.01	0	0	0.009	0.011	0.01	0	0	0.013	0.041	0	0	0.013	0	0.011	0.015	0	0	0	0	0	0	0	0	0	0.011	0.011	0.014	0	0.01	0.01	0	0	0	0.008	0	0.01	0.016	0.009	0.013	0	0	0	0	0	0	0
TNFSF12_TNFRSF12A	0	0	0	0.011	0.01	0.017	0.013	0.009	0.013	0	0	0	0	0	0	0	0.013	0.01	0.009	0	0	0.009	0	0	0	0	0	0.01	0.01	0.014	0.012	0.01	0	0	0	0	0.009	0	0.01	0	0.009	0	0	0	0	0	0	0	0
CD70_GPRC5B	0	0	0	0	0	0	0	0	0	0	0	0	0	0	0	0	0	0	0	0	0	0	0	0	0	0	0	0	0	0	0	0	0	0	0	0	0	0	0	0	0	0	0	0	0	0.022	0	0.009	0.007
HCRT_HCRTR2	0.001	0	0	0.009	0	0.012	0.006	0	0.002	0	0	0	0	0	0	0	0.011	0	0	0	0	0.001	0	0	0	0	0	0	0	0.011	0	0	0	0	0	0	0	0.012	0.006	0	0	0	0	0	0	0	0	0	0
VEGFA_FLT1	0.001	0	0	0	0	0.001	0	0	0	0	0	0	0	0	0	0	0.001	0	0.001	0	0	0	0	0	0	0	0	0	0	0	0	0	0	0	0	0	0	0	0	0.004	0.001	0.002	0.001	0	0	0	0	0.001	0
VEGFA_EPHB2	0	0	0	0	0	0	0	0	0	0	0	0	0	0	0	0	0.001	0	0	0	0	0	0	0	0	0	0	0	0.001	0	0	0	0	0	0	0	0.002	0	0	0.002	0	0	0	0	0	0	0	0.001	0
FZD6_WNT5A	0	0	0	0	0	0.002	0	0.001	0	0	0	0	0	0	0	0	0.002	0	0	0	0	0	0	0	0	0	0	0	0	0	0	0	0	0	0	0	0	0	0	0	0	0	0	0	0	0	0	0.003	0
PLXNC1_SEMA7A	0.018	0	0.006	0	0.006	0.008	0.012	0.005	0.008	0.014	0	0	0	0	0	0.01	0.008	0.006	0	0.005	0.022	0.009	0	0.011	0.015	0	0.007	0.006	0	0.031	0	0.005	0	0	0	0	0.005	0	0.012	0	0.005	0.014	0.02	0	0.008	0	0.009	0.011	0.014
LGR4_RSPO3	0	0	0	0	0	0	0	0	0	0	0	0	0	0	0	0	0	0	0	0	0	0	0	0	0	0	0	0	0	0	0	0	0	0	0	0	0	0	0	0	0	0	0	0	0	0	0	0	0
LRP6_CKLF	0	0	0	0	0	0	0	0	0	0	0	0	0	0	0	0	0	0	0	0	0	0	0	0	0	0	0	0	0	0	0	0	0	0	0	0	0	0	0	0	0	0	0.042	0.021	0.049	0.039	0.007	0.037	0.055
COPA_P2RY6	0.072	0	0	0	0	0	0.06	0.058	0.058	0	0.062	0	0	0	0	0	0	0	0.058	0	0.062	0	0	0	0.063	0	0	0	0	0	0	0	0	0	0	0	0.058	0	0.059	0	0.064	0	0.052	0	0	0	0	0	0.04
NAMPT_P2RY6	0.028	0	0	0	0	0	0.016	0.014	0.015	0	0.018	0	0	0	0	0	0	0	0.015	0	0.018	0	0	0	0.019	0	0	0	0	0	0	0	0	0	0	0	0.015	0	0.016	0	0.02	0	0.022	0	0	0	0	0	0.01
C3_C3AR1	0.001	0	0	0	0	0	0	0.001	0.007	0.005	0.005	0	0	0	0	0.003	0.001	0.003	0.003	0	0	0.001	0	0	0.011	0	0.006	0	0.038	0	0	0.003	0	0.015	0	0	0.015	0	0	0	0.003	0	0	0	0	0	0	0	0
ADORA2B_ENTPD1	0	0	0	0	0	0	0	0	0	0	0	0	0	0	0	0	0	0	0	0	0	0	0	0	0	0	0	0	0	0	0	0	0	0	0	0	0	0	0	0	0	0	0	0	0	0	0	0	0
AGT_AGTR1	0	0	0	0	0	0	0	0	0	0	0	0	0	0	0	0	0	0	0	0	0	0	0	0	0	0	0	0	0	0	0	0	0	0	0	0	0	0	0	0	0	0	0	0	0	0	0	0	0
C5_C5AR1	0.004	0	0.003	0.008	0	0.003	0.006	0.003	0.079	0	0.021	0	0	0	0.006	0.02	0.004	0.004	0.019	0.009	0.079	0.003	0	0	0.031	0	0.004	0.002	0.185	0	0	0	0	0.032	0	0.065	0.138	0.012	0.005	0.003	0.02	0.003	0.003	0	0.002	0.007	0	0.002	0.005
C5_C5AR2	0	0	0	0	0	0.002	0	0	0.003	0	0	0	0	0	0	0	0.002	0	0	0	0.004	0	0	0	0	0.003	0	0	0.005	0	0	0	0	0	0	0	0.002	0	0	0	0.002	0	0	0	0	0	0	0.001	0
TG_ASGR1	0	0	0	0	0	0	0	0	0	0	0	0	0	0	0	0	0	0	0	0	0	0	0	0	0	0	0	0	0	0	0	0	0	0	0	0	0	0	0	0	0	0	0	0	0	0	0	0	0
IL1B_ADRB2	0.003	0	0	0	0.003	0.005	0.003	0.003	0.004	0	0	0.005	0	0	0	0	0.003	0.019	0.007	0.003	0.003	0.004	0	0	0.009	0	0	0	0.002	0.006	0	0.003	0	0	0	0	0.004	0	0	0.007	0.003	0	0.01	0	0	0	0.011	0.012	0.011
ANXA1_FPR1	0	0	0.016	0	0	0.015	0	0	0.016	0	0	0	0	0	0	0	0	0	0	0.016	0.017	0	0	0	0	0	0	0	0.018	0	0	0	0	0.021	0	0	0.021	0	0	0	0.016	0	0	0	0.005	0	0	0.004	0
ANXA1_FPR3	0	0.015	0	0	0	0.016	0	0	0.016	0	0	0	0	0	0	0	0.015	0	0.016	0.016	0	0	0	0	0	0	0	0	0.015	0	0	0	0	0	0	0	0.015	0	0	0	0.018	0	0	0.004	0	0	0	0.005	0
ANXA1_FPR2	0.015	0	0	0	0	0	0	0.015	0.017	0	0.019	0	0	0	0	0	0.015	0	0.024	0.016	0.021	0	0	0	0.02	0	0	0	0.023	0	0	0	0	0.018	0	0.024	0.029	0.026	0	0	0.016	0	0.004	0	0	0	0	0	0
APP_FPR2	0.358	0	0	0	0	0	0	0.358	0.36	0	0.362	0	0	0	0	0	0.358	0	0.366	0.358	0.364	0	0	0	0.363	0	0	0	0.365	0	0	0	0	0.361	0	0.367	0.372	0.368	0	0	0.359	0	0.025	0	0	0	0	0	0
TNFSF9_ADGRG5	0.024	0	0	0	0	0	0.006	0.003	0	0	0.005	0.004	0	0.003	0	0	0.001	0.014	0.003	0.002	0.012	0.015	0.004	0	0.022	0	0	0	0	0	0.005	0.004	0	0	0.006	0.01	0.001	0	0	0.005	0.002	0	0	0	0	0	0	0	0
CD2_CD58	0.009	0.015	0.01	0	0.008	0.008	0.018	0.023	0.019	0.011	0.023	0.014	0	0	0.02	0.028	0.009	0.03	0.02	0.02	0.028	0.01	0.008	0	0	0	0.018	0.024	0.03	0.011	0	0.023	0.025	0.01	0	0.015	0.025	0	0	0.009	0.024	0.019	0	0	0	0	0	0	0
PROS1_AXL	0.001	0	0	0.011	0	0.006	0.003	0	0.005	0	0	0	0	0	0	0	0.008	0	0.001	0	0.003	0.004	0	0.016	0.032	0	0	0	0	0.027	0	0	0	0	0	0	0	0.011	0.006	0.002	0.007	0	0	0	0	0	0	0	0
PROS1_TYRO3	0	0	0	0	0	0.001	0	0.001	0	0	0	0	0	0	0	0	0.001	0.001	0	0.001	0.003	0.001	0	0	0.006	0	0	0.001	0.005	0	0	0	0.003	0	0	0.009	0.003	0	0	0.003	0.002	0	0	0	0	0	0	0	0
CSF1R_CSF1	0.016	0	0	0.118	0	0.162	0.099	0.024	0.11	0.02	0.036	0.017	0	0	0.02	0.025	0.172	0.018	0.017	0.016	0	0.016	0.017	0	0	0	0.037	0.038	0.016	0.077	0	0	0.017	0	0	0	0.016	0.097	0.153	0.029	0	0.055	0	0	0	0	0	0	0
CSF1R_IL34	0.016	0	0	0.08	0	0.045	0.032	0	0.031	0	0	0.017	0	0	0	0	0.06	0	0	0	0	0	0	0	0	0	0	0	0	0	0	0	0	0	0	0	0.015	0	0.037	0.017	0	0	0	0	0	0	0	0	0
CD55_ADGRE5	0.06	0.052	0.068	0.043	0	0.044	0.044	0.052	0.066	0	0.069	0.068	0.046	0	0.067	0.048	0.047	0.136	0.093	0.065	0.093	0.066	0	0.045	0.1	0	0.053	0.043	0.168	0.049	0.046	0.061	0.047	0.048	0.044	0.126	0.087	0.049	0.052	0.07	0.084	0.052	0.068	0.06	0.076	0.051	0	0.052	0.052
PTPRC_CD22	0.135	0.164	0.159	0	0	0.135	0.135	0.134	0.134	0	0	0.136	0	0	0	0	0.134	0.134	0.134	0.134	0	0.138	0	0	0.157	0	0	0	0.134	0	0	0.134	0.158	0	0.234	0	0.134	0	0.139	0.14	0.141	0	0.03	0.059	0.054	0	0	0.03	0.031
CD48_CD244	0.054	0	0.056	0	0	0	0.056	0.06	0.056	0	0	0.058	0	0	0	0.056	0	0.076	0.056	0.055	0.056	0.055	0	0	0	0	0	0.054	0.066	0	0	0.057	0	0.055	0	0.072	0.06	0.064	0	0.055	0.057	0	0.006	0	0.009	0	0	0	0.009
PDGFRB_PDGFD	0	0	0	0	0	0	0	0.002	0.001	0	0	0.002	0	0	0	0	0	0.008	0	0.003	0	0	0	0.008	0.006	0	0	0	0	0.016	0	0.001	0	0	0	0	0.001	0	0	0.002	0.001	0	0	0	0	0	0	0	0
ALOX5_ALOX5AP	0.426	0.031	0.011	0	0.003	0.002	0.094	0.007	0.046	0	0.042	0.057	0.006	0.003	0.17	0.02	0.004	0.159	0.102	0.046	0.248	0.158	0.003	0	0.363	0.009	0.188	0.003	0.009	0	0.009	0.015	0.01	0.279	0.078	0.175	0.085	0.055	0.003	0.011	0.044	0.01	0.439	0.045	0.024	0	0.016	0.016	0.107
KIT_KITLG	0.001	0	0	0.07	0	0.087	0.038	0.001	0.058	0	0	0	0	0	0	0	0.115	0.001	0	0	0	0.001	0	0.025	0	0	0	0	0.001	0.074	0	0	0	0	0	0	0.001	0.05	0.118	0.002	0.001	0	0.002	0	0	0.071	0	0.088	0.04
EPOR_KITLG	0.001	0	0	0.07	0	0.087	0.038	0.001	0.058	0	0	0	0	0	0	0	0.115	0.001	0	0	0	0.001	0	0.025	0	0	0	0	0.001	0.074	0	0	0	0	0	0	0.001	0.05	0.118	0.002	0.001	0	0.001	0	0	0.07	0	0.087	0.039
HLA-E_KLRC1	0.042	0	0	0	0	0.042	0.052	0.042	0	0	0	0.045	0	0	0	0	0	0.103	0.043	0	0	0	0	0	0	0	0	0	0.043	0	0	0	0	0	0	0.065	0.042	0	0	0.046	0.043	0	0.097	0	0	0	0	0.097	0.107
HLA-E_KLRC2	0	0	0	0	0	0.042	0.044	0	0	0	0	0	0	0	0	0	0.042	0.073	0.043	0	0	0	0	0	0	0	0	0	0	0	0	0	0	0	0	0.069	0	0	0	0	0	0	0	0	0	0	0	0.097	0.099
SELL_CD34	0	0.22	0.189	0	0	0.171	0.178	0.228	0.171	0	0.218	0.172	0	0	0	0	0.171	0.171	0.172	0.177	0.175	0.173	0	0	0	0	0.196	0	0.171	0	0	0.176	0.189	0	0	0	0.171	0.181	0	0.184	0.173	0.172	0	0.067	0.035	0	0	0.018	0.025
SELP_CD34	0	0	0	0	0	0	0	0	0	0	0	0	0	0	0	0	0	0	0	0	0	0	0	0	0	0	0	0	0	0	0	0	0	0	0	0	0	0	0	0	0	0	0	0	0	0	0	0	0
SELL_SELPLG	0.313	0	0.172	0.172	0.173	0.171	0.209	0.181	0.19	0	0.192	0.196	0.176	0.173	0.183	0.183	0.171	0.243	0.204	0.202	0.269	0.195	0.178	0	0.249	0	0.185	0.172	0.258	0	0.182	0.184	0	0.181	0	0.216	0.21	0	0.173	0.179	0.205	0.182	0.16	0	0.019	0.019	0.019	0.018	0.055
SELP_SELPLG	0	0	0	0	0	0	0	0	0	0	0	0	0	0	0	0	0	0	0	0	0	0	0	0	0	0	0	0	0	0	0	0	0	0	0	0	0	0	0	0	0	0	0	0	0	0	0	0	0
SELP_CD24	0	0	0	0	0	0	0	0	0	0	0	0	0	0	0	0	0	0	0	0	0	0	0	0	0	0	0	0	0	0	0	0	0	0	0	0	0	0	0	0	0	0	0	0	0	0	0	0	0
NPR3_NPPC	0.001	0.021	0.002	0	0	0	0	0.001	0	0	0	0.007	0	0	0	0	0	0	0	0	0	0.002	0	0	0	0	0	0	0	0	0	0.001	0.011	0	0	0	0	0	0	0.002	0	0	0	0	0	0	0	0	0
NPR2_NPPC	0.001	0.021	0.002	0	0	0	0	0.001	0	0	0	0.007	0	0	0	0	0	0	0	0	0	0.002	0	0	0	0	0	0	0	0	0	0.001	0.011	0	0	0	0	0	0	0.002	0	0	0	0	0	0	0	0	0
SPN_SIGLEC1	0	0	0	0	0	0	0	0	0	0	0	0	0	0	0	0	0	0	0	0	0.025	0.023	0	0	0	0	0	0	0.023	0	0	0	0	0	0	0	0.023	0	0	0.024	0.024	0	0	0	0	0	0	0	0
PDGFRA_PDGFC	0	0	0	0	0	0	0	0	0	0	0	0	0	0	0	0	0	0	0	0	0	0	0	0	0	0	0	0	0	0	0	0	0	0	0	0	0	0	0	0	0	0	0	0	0	0	0	0	0
PECAM1_CD38	0.028	0.092	0.063	0	0.053	0.021	0.031	0.043	0.023	0	0.06	0.022	0.08	0.053	0	0	0.021	0.035	0.033	0.053	0.028	0.048	0.08	0.028	0.032	0.061	0.055	0.027	0.022	0	0.07	0.057	0.093	0.023	0.042	0	0.024	0.043	0	0.051	0.027	0.031	0.03	0.093	0.064	0	0.054	0.023	0.032
PECAM1_CD177	0	0	0	0	0	0	0	0.021	0	0	0	0	0	0	0	0	0	0	0	0	0	0	0	0	0	0	0	0	0	0	0	0	0	0.046	0	0	0.021	0	0	0	0	0	0	0	0	0	0	0	0
TNFSF4_TNFRSF4	0.003	0	0.003	0.003	0.01	0.007	0.004	0.002	0.006	0	0	0.028	0.007	0.015	0	0	0.006	0.014	0	0	0	0.003	0.011	0	0.007	0.01	0	0	0.002	0	0.015	0	0	0	0	0.011	0.002	0	0	0	0.003	0	0.005	0	0.005	0.005	0.011	0.009	0.006
FPR3_HEBP1	0	0	0	0	0	0	0	0	0	0	0	0	0	0	0	0	0	0	0	0	0	0	0	0	0	0	0	0	0	0	0	0	0	0	0	0	0	0	0	0	0	0	0.018	0.019	0.026	0.085	0	0.053	0.039
FPR2_CAMP	0.001	0.018	0.014	0	0.004	0.001	0	0.003	0.005	0.005	0.057	0.011	0.003	0.007	0.183	0.024	0.001	0.005	0.007	0.003	0.003	0.001	0.005	0	0.006	0.018	0.003	0.004	0.004	0	0	0.007	0.011	1.351	0	0.028	0.008	0.011	0	0.031	0.004	0.004	0	0	0	0	0	0	0
TNFRSF8_TNFSF8	0.004	0.002	0.008	0	0	0	0.003	0.001	0.001	0	0	0.012	0.003	0	0	0	0	0.002	0.002	0.001	0.007	0.003	0.002	0	0	0	0	0	0.001	0	0	0	0.002	0	0	0	0.004	0	0	0.004	0.003	0	0	0	0	0	0	0	0
CD6_ALCAM	0.029	0.003	0.007	0.003	0.009	0.002	0.009	0.017	0.009	0	0.014	0.003	0	0.005	0.028	0	0.002	0.004	0.02	0.018	0.021	0.015	0.005	0.008	0.033	0.007	0.01	0	0.007	0.012	0	0.036	0.003	0.006	0.012	0.011	0.011	0	0.005	0.018	0.034	0.005	0	0	0	0	0	0	0
AXL_IL15RA	0	0.004	0.002	0.008	0	0.011	0.006	0.003	0.004	0	0	0.002	0.008	0.003	0	0.009	0.011	0.002	0	0.006	0	0.001	0	0	0	0.003	0	0.01	0.002	0.006	0	0.002	0	0	0	0	0.003	0	0.003	0.002	0.002	0.01	0	0	0	0	0	0	0
IL15_IL15RA	0	0.003	0.002	0.008	0	0.01	0.005	0.003	0.003	0	0	0.002	0.008	0.002	0	0.008	0.011	0.002	0	0.005	0	0.001	0	0	0	0.002	0	0.01	0.002	0.006	0	0.002	0	0	0	0	0.003	0	0.002	0.002	0.001	0.01	0	0.005	0.004	0.01	0	0.012	0.007
AXL_GAS6	0.09	0.001	0	0.691	0.015	0.467	0.275	0.003	0.264	0	0.009	0	0.023	0.027	0	0.017	0.492	0.007	0.011	0.007	0.043	0.019	0.035	0.025	0.094	0.024	0	0.003	0.005	0.17	0.014	0.002	0	0	0	0	0.007	0.115	0.331	0.006	0.017	0.002	0	0	0	0	0	0	0
TYRO3_GAS6	0	0	0	0	0	0	0	0	0	0	0	0	0	0	0	0	0	0	0	0	0	0	0	0	0	0	0	0	0	0	0	0	0	0	0	0	0	0	0	0	0	0	0	0	0	0	0	0	0
MERTK_GAS6	0.09	0.001	0	0.69	0.015	0.467	0.275	0.003	0.264	0	0.009	0	0.022	0.027	0	0.017	0.492	0.006	0.011	0.006	0.043	0.019	0.034	0.025	0.094	0.024	0	0.003	0.004	0.17	0.014	0.002	0	0	0	0	0.006	0.115	0.331	0.006	0.017	0.002	0	0	0	0	0	0	0
CD52_SIGLEC10	0.193	0.193	0.194	0	0	0.193	0.195	0.195	0.199	0	0	0.194	0	0	0	0.195	0.193	0.194	0.194	0.196	0.199	0.195	0	0	0.198	0	0.196	0.193	0.256	0	0	0	0	0.194	0.219	0.202	0.2	0	0	0	0.202	0.194	0.15	0.15	0.151	0	0	0.15	0.152
BMP8B_PLAUR	0.027	0.002	0.009	0.007	0.002	0.06	0.038	0.024	0.228	0	0.038	0.004	0.005	0	0.019	0.036	0.028	0.007	0.144	0.08	0.129	0.03	0.003	0.014	0.101	0.004	0.114	0.004	0.132	0.032	0	0.054	0.005	0.053	0.006	0.238	0.312	0.044	0.026	0.029	0.189	0.004	0	0	0	0	0	0	0
FLT3_FLT3LG	0	0.019	0.019	0.02	0.02	0.022	0.021	0.019	0.02	0	0.021	0.054	0	0	0	0	0.022	0.033	0.017	0.017	0	0	0	0.03	0	0	0	0.017	0.022	0.022	0	0.018	0.018	0	0.022	0	0.018	0	0.02	0.019	0.018	0.018	0	0.003	0.004	0.004	0.005	0.007	0.006
CMKLR1_RARRES2	0.021	0	0	0.468	0.018	0.384	0.193	0.019	0.238	0	0.027	0.019	0	0	0	0.022	0.368	0.018	0.019	0.018	0.024	0.021	0.018	0.079	0.027	0	0.019	0.016	0.018	0.264	0.02	0.017	0	0	0	0	0.019	0.266	0.141	0.019	0.02	0	0	0	0	0	0	0	0
NMU_NMUR1	0	0	0	0	0	0	0	0	0	0	0	0	0	0	0	0	0	0	0	0	0	0	0	0	0	0	0	0	0	0	0	0	0	0	0	0	0	0	0	0	0	0	0	0	0	0.002	0	0.001	0.005
CX3CR1_CX3CL1	0	0	0	0.002	0	0.001	0.003	0	0.001	0	0	0	0	0	0	0	0.002	0	0	0	0	0	0	0	0	0	0	0	0	0	0	0	0	0	0	0	0	0	0	0	0	0	0	0	0	0	0	0	0
LILRA4_BST2	0.513	0.412	0.413	0.514	0.392	0.51	0.518	0.504	0.506	0	0.488	0.456	0.391	0.398	0.352	0.385	0.521	0.476	0.462	0.496	0.472	0.445	0.388	0.405	0.445	0.377	0.422	0.371	0.49	0.447	0.4	0.438	0.379	0.355	0.419	0.5	0.48	0.545	0.413	0.387	0.455	0.369	0	0	0	0	0	0	0
DSC2_DSG2	0	0	0	0	0	0	0	0	0	0	0	0	0	0	0	0	0	0	0	0	0	0	0	0	0	0	0	0	0	0	0	0	0	0	0	0	0	0	0	0	0	0	0	0	0	0	0	0	0
LRP1_ERFE	0	0	0	0	0	0.002	0	0	0	0	0	0	0	0	0	0	0	0.003	0	0	0	0	0	0	0	0	0	0.005	0	0	0	0	0	0	0	0	0	0	0	0	0	0.005	0	0	0	0	0	0.001	0
CD47_SIRPG	0.06	0	0	0	0	0.06	0	0	0	0	0	0.08	0	0	0	0	0	0.062	0	0	0	0.061	0	0	0	0	0	0	0.06	0	0	0	0	0	0	0	0.06	0	0	0.062	0	0	0.058	0	0	0	0	0.058	0
IL16_GRIN2C	0.057	0	0.057	0	0	0	0	0.056	0	0	0.06	0	0	0	0.061	0	0.056	0.057	0.057	0.057	0.058	0.056	0	0	0.061	0	0	0	0.057	0	0	0.057	0	0.059	0	0	0.058	0	0.058	0.059	0.058	0.058	0.025	0	0.026	0	0	0	0
GPR19_ENHO	0.001	0	0	0	0	0	0.003	0.001	0.006	0	0	0	0	0	0	0	0.001	0	0.002	0.001	0	0.003	0	0.067	0.011	0	0	0	0.007	0.006	0	0	0	0	0	0	0.001	0	0	0	0.084	0	0.002	0	0	0	0	0	0.004
LAIR1_LILRB4	0.216	0.081	0	0.084	0	0.081	0.115	0.082	0.096	0	0.089	0	0	0.082	0	0	0.081	0.083	0.104	0.105	0.144	0.175	0.082	0	0.187	0	0	0.081	0.1	0	0	0.084	0	0.082	0	0.108	0.107	0.102	0	0.085	0.11	0	0.185	0.05	0	0.053	0	0.05	0.084
VSTM1_ADGRG3	0.002	0.001	0.002	0	0	0	0.003	0.002	0.001	0	0	0	0	0	0.024	0	0	0.002	0	0.001	0	0	0	0	0	0	0.004	0	0.001	0	0	0.004	0.002	0.037	0	0	0.001	0	0	0.005	0.001	0	0	0	0	0	0	0	0
CLEC2B_KLRF1	0.037	0	0	0	0	0.035	0.044	0.036	0.038	0	0	0.036	0	0	0	0	0.035	0.251	0.036	0.035	0.037	0.036	0	0	0	0	0	0.035	0.036	0	0	0	0	0	0	0.127	0.035	0	0	0.037	0.035	0	0.047	0	0	0	0	0.045	0.054
ESAM_ESAM	0	0	0	0	0	0	0	0	0	0	0	0	0	0	0	0	0	0	0	0	0	0	0	0	0	0	0	0	0	0	0	0	0	0	0	0	0	0	0	0	0	0	0	0	0	0	0	0	0
COL6A6_a10b1 complex	0	0	0	0	0	0	0	0	0	0	0	0	0	0	0	0	0	0	0	0	0	0	0	0	0	0	0	0	0	0	0	0	0	0	0	0	0	0	0	0	0	0	0	0.002	0	0	0	0.001	0
COL1A1_a10b1 complex	0	0	0	0	0	0	0	0	0	0	0	0	0	0	0	0	0	0	0	0	0	0	0	0	0	0	0	0	0	0	0	0	0	0	0	0	0	0	0	0	0	0	0	0.002	0	0	0	0.001	0
COL3A1_a10b1 complex	0	0.002	0	0	0	0.002	0	0	0	0	0	0	0	0	0	0	0.002	0	0	0	0	0	0	0	0	0	0	0	0	0.067	0	0.002	0	0	0	0	0.001	0	0.005	0	0.002	0	0	0	0	0	0	0	0
COL4A1_a10b1 complex	0	0	0	0	0	0	0	0	0	0	0	0	0	0	0	0	0	0	0	0	0	0	0	0	0	0	0	0	0	0	0	0	0	0	0	0	0	0	0	0	0	0	0	0	0	0	0	0	0
FN1_a10b1 complex	0	0.002	0	0	0	0.002	0	0	0	0	0	0	0	0	0	0	0.002	0	0	0	0	0	0	0	0	0	0	0	0	0.067	0	0.002	0	0	0	0	0.001	0	0.005	0	0.002	0	0	0.003	0	0	0	0.002	0
COL5A2_a10b1 complex	0	0	0	0	0	0	0	0	0	0	0	0	0	0	0	0	0	0	0	0	0	0	0	0	0	0	0	0	0	0	0	0	0	0	0	0	0	0	0	0	0	0	0	0	0	0	0	0	0
COL1A2_a10b1 complex	0	0.002	0	0	0	0.001	0	0	0	0	0	0	0	0	0	0	0.001	0	0	0	0	0	0	0	0	0	0	0	0	0.066	0	0.001	0	0	0	0	0.001	0	0.004	0	0.001	0	0	0	0	0	0	0	0
COL4A2_a10b1 complex	0	0	0	0	0	0	0	0	0	0	0	0	0	0	0	0	0	0	0	0	0	0	0	0	0	0	0	0	0	0	0	0	0	0	0	0	0	0	0	0	0	0	0	0	0	0	0	0	0
COL11A1_a10b1 complex	0	0.002	0	0	0	0.001	0	0	0	0	0	0	0	0	0	0	0.001	0	0	0	0	0	0	0	0	0	0	0	0	0.066	0	0.001	0	0	0	0	0.001	0	0.004	0	0.001	0	0	0	0	0	0	0	0
COL6A1_a10b1 complex	0	0	0	0	0	0	0	0	0	0	0	0	0	0	0	0	0	0	0	0	0	0	0	0	0	0	0	0	0	0	0	0	0	0	0	0	0	0	0	0	0	0	0	0.002	0	0	0	0.001	0
COL6A2_a10b1 complex	0	0.002	0	0	0	0.001	0	0	0	0	0	0	0	0	0	0	0.001	0	0	0	0	0	0	0	0	0	0	0	0	0.067	0	0.001	0	0	0	0	0.001	0	0.004	0	0.002	0	0	0	0	0	0	0	0
COL6A3_a10b1 complex	0	0.002	0	0	0	0.001	0	0	0	0	0	0	0	0	0	0	0.001	0	0	0	0	0	0	0	0	0	0	0	0	0.066	0	0.001	0	0	0	0	0.001	0	0.004	0	0.001	0	0	0	0	0	0	0	0
COL11A2_a10b1 complex	0	0	0	0	0	0	0	0	0	0	0	0	0	0	0	0	0	0	0	0	0	0	0	0	0	0	0	0	0	0	0	0	0	0	0	0	0	0	0	0	0	0	0	0.002	0	0	0	0.001	0
COL5A1_a10b1 complex	0	0	0	0	0	0	0	0	0	0	0	0	0	0	0	0	0	0	0	0	0	0	0	0	0	0	0	0	0	0	0	0	0	0	0	0	0	0	0	0	0	0	0	0.007	0	0	0	0.007	0
COL8A2_a10b1 complex	0	0.003	0	0	0	0.002	0	0	0	0	0	0	0	0	0	0	0.002	0	0	0	0	0	0	0	0	0	0	0	0	0.068	0	0.002	0	0	0	0	0.002	0	0.006	0	0.003	0	0	0	0	0	0	0	0
COL5A3_a10b1 complex	0	0	0	0	0	0	0	0	0	0	0	0	0	0	0	0	0	0	0	0	0	0	0	0	0	0	0	0	0	0	0	0	0	0	0	0	0	0	0	0	0	0	0	0	0	0	0	0	0
COL8A1_a10b1 complex	0	0.002	0	0	0	0.001	0	0	0	0	0	0	0	0	0	0	0.001	0	0	0	0	0	0	0	0	0	0	0	0	0.066	0	0.001	0	0	0	0	0.001	0	0.004	0	0.001	0	0	0	0	0	0	0	0
COL15A1_a10b1 complex	0	0	0	0	0	0	0	0	0	0	0	0	0	0	0	0	0	0	0	0	0	0	0	0	0	0	0	0	0	0	0	0	0	0	0	0	0	0	0	0	0	0	0	0	0	0	0	0	0
COL18A1_a10b1 complex	0	0.003	0	0	0	0.002	0	0	0	0	0	0	0	0	0	0	0.002	0	0	0	0	0	0	0	0	0	0	0	0	0.068	0	0.002	0	0	0	0	0.002	0	0.006	0	0.003	0	0	0	0	0	0	0	0
COL4A4_a10b1 complex	0	0.002	0	0	0	0.002	0	0	0	0	0	0	0	0	0	0	0.002	0	0	0	0	0	0	0	0	0	0	0	0	0.067	0	0.002	0	0	0	0	0.001	0	0.005	0	0.002	0	0	0	0	0	0	0	0
COL7A1_a10b1 complex	0	0.002	0	0	0	0.001	0	0	0	0	0	0	0	0	0	0	0.001	0	0	0	0	0	0	0	0	0	0	0	0	0.066	0	0.001	0	0	0	0	0.001	0	0.004	0	0.001	0	0	0	0	0	0	0	0
COL10A1_a10b1 complex	0	0	0	0	0	0	0	0	0	0	0	0	0	0	0	0	0	0	0	0	0	0	0	0	0	0	0	0	0	0	0	0	0	0	0	0	0	0	0	0	0	0	0	0.002	0	0	0	0.001	0
COL14A1_a10b1 complex	0	0.002	0	0	0	0.001	0	0	0	0	0	0	0	0	0	0	0.001	0	0	0	0	0	0	0	0	0	0	0	0	0.067	0	0.001	0	0	0	0	0.001	0	0.004	0	0.002	0	0	0	0	0	0	0	0
COL16A1_a10b1 complex	0	0.002	0	0	0	0.001	0	0	0	0	0	0	0	0	0	0	0.001	0	0	0	0	0	0	0	0	0	0	0	0	0.066	0	0.001	0	0	0	0	0.001	0	0.004	0	0.001	0	0	0	0	0	0	0	0
COL9A3_a10b1 complex	0	0.002	0	0	0	0.002	0	0	0	0	0	0	0	0	0	0	0.002	0	0	0	0	0	0	0	0	0	0	0	0	0.067	0	0.002	0	0	0	0	0.001	0	0.005	0	0.002	0	0	0.002	0	0	0	0.001	0
COL9A2_a10b1 complex	0	0.002	0	0	0	0.001	0	0	0	0	0	0	0	0	0	0	0.001	0	0	0	0	0	0	0	0	0	0	0	0	0.066	0	0.001	0	0	0	0	0.001	0	0.004	0	0.001	0	0	0	0	0	0	0	0
COL19A1_a10b1 complex	0	0	0	0	0	0	0	0	0	0	0	0	0	0	0	0	0	0	0	0	0	0	0	0	0	0	0	0	0	0	0	0	0	0	0	0	0	0	0	0	0	0	0	0.002	0	0	0	0.001	0
COL24A1_a10b1 complex	0	0.008	0	0	0	0.007	0	0	0	0	0	0	0	0	0	0	0.007	0	0	0	0	0	0	0	0	0	0	0	0	0.073	0	0.007	0	0	0	0	0.007	0	0.011	0	0.008	0	0	0.003	0	0	0	0.003	0
COL28A1_a10b1 complex	0	0	0	0	0	0	0	0	0	0	0	0	0	0	0	0	0	0	0	0	0	0	0	0	0	0	0	0	0	0	0	0	0	0	0	0	0	0	0	0	0	0	0	0.002	0	0	0	0.001	0
COL13A1_a10b1 complex	0	0	0	0	0	0	0	0	0	0	0	0	0	0	0	0	0	0	0	0	0	0	0	0	0	0	0	0	0	0	0	0	0	0	0	0	0	0	0	0	0	0	0	0	0	0	0	0	0
COL27A1_a10b1 complex	0	0	0	0	0	0	0	0	0	0	0	0	0	0	0	0	0	0	0	0	0	0	0	0	0	0	0	0	0	0	0	0	0	0	0	0	0	0	0	0	0	0	0	0.002	0	0	0	0.001	0
COL26A1_a10b1 complex	0	0.004	0	0	0	0.004	0	0	0	0	0	0	0	0	0	0	0.004	0	0	0	0	0	0	0	0	0	0	0	0	0.069	0	0.004	0	0	0	0	0.003	0	0.007	0	0.004	0	0	0	0	0	0	0	0
COL21A1_a10b1 complex	0	0	0	0	0	0	0	0	0	0	0	0	0	0	0	0	0	0	0	0	0	0	0	0	0	0	0	0	0	0	0	0	0	0	0	0	0	0	0	0	0	0	0	0	0	0	0	0	0
COL12A1_a10b1 complex	0	0	0	0	0	0	0	0	0	0	0	0	0	0	0	0	0	0	0	0	0	0	0	0	0	0	0	0	0	0	0	0	0	0	0	0	0	0	0	0	0	0	0	0	0	0	0	0	0
COL17A1_a10b1 complex	0	0	0	0	0	0	0	0	0	0	0	0	0	0	0	0	0	0	0	0	0	0	0	0	0	0	0	0	0	0	0	0	0	0	0	0	0	0	0	0	0	0	0	0	0	0	0	0	0
COL6A6_a1b1 complex	0	0	0	0	0	0	0	0	0	0	0	0	0	0	0	0	0	0	0	0	0	0	0	0	0	0	0	0	0	0	0	0	0	0	0	0	0	0	0	0	0	0	0.001	0	0	0.046	0	0.023	0.003
COL1A1_a1b1 complex	0	0	0	0	0	0	0	0	0	0	0	0	0	0	0	0	0	0	0	0	0	0	0	0	0	0	0	0	0	0	0	0	0	0	0	0	0	0	0	0	0	0	0.001	0	0	0.046	0	0.023	0.003
COL3A1_a1b1 complex	0.001	0	0	0.047	0	0.023	0.004	0	0.01	0	0	0	0	0	0	0	0.034	0.002	0.003	0.002	0.003	0	0	0	0	0	0	0	0.001	0.017	0	0	0	0	0	0	0.002	0.018	0.044	0	0	0	0	0	0	0	0	0	0
COL4A1_a1b1 complex	0	0	0	0	0	0	0	0	0	0	0	0	0	0	0	0	0	0	0	0	0	0	0	0	0	0	0	0	0	0	0	0	0	0	0	0	0	0	0	0	0	0	0	0	0	0	0	0	0
COL5A2_a1b1 complex	0	0	0	0	0	0	0	0	0	0	0	0	0	0	0	0	0	0	0	0	0	0	0	0	0	0	0	0	0	0	0	0	0	0	0	0	0	0	0	0	0	0	0	0	0	0	0	0	0
COL1A2_a1b1 complex	0.001	0	0	0.046	0	0.023	0.003	0	0.009	0	0	0	0	0	0	0	0.033	0.001	0.002	0.002	0.003	0	0	0	0	0	0	0	0.001	0.016	0	0	0	0	0	0	0.001	0.018	0.043	0	0	0	0	0	0	0	0	0	0
COL4A2_a1b1 complex	0	0	0	0	0	0	0	0	0	0	0	0	0	0	0	0	0	0	0	0	0	0	0	0	0	0	0	0	0	0	0	0	0	0	0	0	0	0	0	0	0	0	0	0	0	0	0	0	0
COL11A1_a1b1 complex	0.001	0	0	0.046	0	0.023	0.003	0	0.009	0	0	0	0	0	0	0	0.033	0.001	0.002	0.002	0.003	0	0	0	0	0	0	0	0.001	0.016	0	0	0	0	0	0	0.001	0.018	0.043	0	0	0	0	0	0	0	0	0	0
COL6A1_a1b1 complex	0	0	0	0	0	0	0	0	0	0	0	0	0	0	0	0	0	0	0	0	0	0	0	0	0	0	0	0	0	0	0	0	0	0	0	0	0	0	0	0	0	0	0.001	0	0	0.046	0	0.023	0.003
COL6A2_a1b1 complex	0.001	0	0	0.046	0	0.023	0.003	0	0.009	0	0	0	0	0	0	0	0.034	0.001	0.002	0.002	0.003	0	0	0	0	0	0	0	0.001	0.016	0	0	0	0	0	0	0.001	0.018	0.044	0	0	0	0	0	0	0	0	0	0
COL6A3_a1b1 complex	0.001	0	0	0.046	0	0.023	0.003	0	0.009	0	0	0	0	0	0	0	0.033	0.001	0.002	0.002	0.003	0	0	0	0	0	0	0	0.001	0.016	0	0	0	0	0	0	0.001	0.018	0.043	0	0	0	0	0	0	0	0	0	0
COL11A2_a1b1 complex	0	0	0	0	0	0	0	0	0	0	0	0	0	0	0	0	0	0	0	0	0	0	0	0	0	0	0	0	0	0	0	0	0	0	0	0	0	0	0	0	0	0	0.001	0	0	0.046	0	0.023	0.003
COL5A1_a1b1 complex	0	0	0	0	0	0	0	0	0	0	0	0	0	0	0	0	0	0	0	0	0	0	0	0	0	0	0	0	0	0	0	0	0	0	0	0	0	0	0	0	0	0	0.007	0	0	0.052	0	0.029	0.009
COL8A2_a1b1 complex	0.002	0	0	0.047	0	0.024	0.004	0	0.01	0	0	0	0	0	0	0	0.035	0.002	0.003	0.003	0.004	0	0	0	0	0	0	0	0.002	0.018	0	0	0	0	0	0	0.002	0.019	0.045	0	0	0	0	0	0	0	0	0	0
COL5A3_a1b1 complex	0	0	0	0	0	0	0	0	0	0	0	0	0	0	0	0	0	0	0	0	0	0	0	0	0	0	0	0	0	0	0	0	0	0	0	0	0	0	0	0	0	0	0	0	0	0	0	0	0
COL8A1_a1b1 complex	0.001	0	0	0.046	0	0.023	0.003	0	0.009	0	0	0	0	0	0	0	0.033	0.001	0.002	0.002	0.003	0	0	0	0	0	0	0	0.001	0.016	0	0	0	0	0	0	0.001	0.018	0.043	0	0	0	0	0	0	0	0	0	0
COL15A1_a1b1 complex	0	0	0	0	0	0	0	0	0	0	0	0	0	0	0	0	0	0	0	0	0	0	0	0	0	0	0	0	0	0	0	0	0	0	0	0	0	0	0	0	0	0	0	0	0	0	0	0	0
COL18A1_a1b1 complex	0.002	0	0	0.047	0	0.024	0.004	0	0.01	0	0	0	0	0	0	0	0.035	0.002	0.003	0.003	0.004	0	0	0	0	0	0	0	0.002	0.018	0	0	0	0	0	0	0.002	0.019	0.045	0	0	0	0	0	0	0	0	0	0
COL4A4_a1b1 complex	0.001	0	0	0.047	0	0.023	0.004	0	0.01	0	0	0	0	0	0	0	0.034	0.002	0.003	0.002	0.003	0	0	0	0	0	0	0	0.001	0.017	0	0	0	0	0	0	0.002	0.018	0.044	0	0	0	0	0	0	0	0	0	0
COL7A1_a1b1 complex	0.001	0	0	0.046	0	0.023	0.003	0	0.009	0	0	0	0	0	0	0	0.033	0.001	0.002	0.002	0.003	0	0	0	0	0	0	0	0.001	0.016	0	0	0	0	0	0	0.001	0.018	0.043	0	0	0	0	0	0	0	0	0	0
COL10A1_a1b1 complex	0	0	0	0	0	0	0	0	0	0	0	0	0	0	0	0	0	0	0	0	0	0	0	0	0	0	0	0	0	0	0	0	0	0	0	0	0	0	0	0	0	0	0.001	0	0	0.046	0	0.023	0.003
COL14A1_a1b1 complex	0.001	0	0	0.046	0	0.023	0.003	0	0.009	0	0	0	0	0	0	0	0.034	0.001	0.002	0.002	0.003	0	0	0	0	0	0	0	0.001	0.016	0	0	0	0	0	0	0.001	0.018	0.044	0	0	0	0	0	0	0	0	0	0
COL16A1_a1b1 complex	0.001	0	0	0.046	0	0.023	0.003	0	0.009	0	0	0	0	0	0	0	0.033	0.001	0.002	0.002	0.003	0	0	0	0	0	0	0	0.001	0.016	0	0	0	0	0	0	0.001	0.018	0.043	0	0	0	0	0	0	0	0	0	0
COL9A3_a1b1 complex	0.001	0	0	0.047	0	0.023	0.004	0	0.01	0	0	0	0	0	0	0	0.034	0.002	0.003	0.002	0.003	0	0	0	0	0	0	0	0.001	0.017	0	0	0	0	0	0	0.002	0.018	0.044	0	0	0	0.001	0	0	0.046	0	0.023	0.003
COL9A2_a1b1 complex	0.001	0	0	0.046	0	0.023	0.003	0	0.009	0	0	0	0	0	0	0	0.033	0.001	0.002	0.002	0.003	0	0	0	0	0	0	0	0.001	0.016	0	0	0	0	0	0	0.001	0.018	0.043	0	0	0	0	0	0	0	0	0	0
COL19A1_a1b1 complex	0	0	0	0	0	0	0	0	0	0	0	0	0	0	0	0	0	0	0	0	0	0	0	0	0	0	0	0	0	0	0	0	0	0	0	0	0	0	0	0	0	0	0.001	0	0	0.046	0	0.023	0.003
COL24A1_a1b1 complex	0.007	0	0	0.052	0	0.029	0.009	0	0.015	0	0	0	0	0	0	0	0.04	0.007	0.008	0.008	0.009	0	0	0	0	0	0	0	0.007	0.023	0	0	0	0	0	0	0.008	0.024	0.05	0	0	0	0.003	0	0	0.048	0	0.025	0.005
COL28A1_a1b1 complex	0	0	0	0	0	0	0	0	0	0	0	0	0	0	0	0	0	0	0	0	0	0	0	0	0	0	0	0	0	0	0	0	0	0	0	0	0	0	0	0	0	0	0.001	0	0	0.046	0	0.023	0.003
COL13A1_a1b1 complex	0	0	0	0	0	0	0	0	0	0	0	0	0	0	0	0	0	0	0	0	0	0	0	0	0	0	0	0	0	0	0	0	0	0	0	0	0	0	0	0	0	0	0	0	0	0	0	0	0
COL27A1_a1b1 complex	0	0	0	0	0	0	0	0	0	0	0	0	0	0	0	0	0	0	0	0	0	0	0	0	0	0	0	0	0	0	0	0	0	0	0	0	0	0	0	0	0	0	0.001	0	0	0.046	0	0.023	0.003
COL26A1_a1b1 complex	0.003	0	0	0.049	0	0.025	0.006	0	0.012	0	0	0	0	0	0	0	0.036	0.004	0.005	0.005	0.005	0	0	0	0	0	0	0	0.003	0.019	0	0	0	0	0	0	0.004	0.02	0.046	0	0	0	0	0	0	0	0	0	0
COL21A1_a1b1 complex	0	0	0	0	0	0	0	0	0	0	0	0	0	0	0	0	0	0	0	0	0	0	0	0	0	0	0	0	0	0	0	0	0	0	0	0	0	0	0	0	0	0	0	0	0	0	0	0	0
COL12A1_a1b1 complex	0	0	0	0	0	0	0	0	0	0	0	0	0	0	0	0	0	0	0	0	0	0	0	0	0	0	0	0	0	0	0	0	0	0	0	0	0	0	0	0	0	0	0	0	0	0	0	0	0
COL17A1_a1b1 complex	0	0	0	0	0	0	0	0	0	0	0	0	0	0	0	0	0	0	0	0	0	0	0	0	0	0	0	0	0	0	0	0	0	0	0	0	0	0	0	0	0	0	0	0	0	0	0	0	0
SEMA7A_a1b1 complex	0.014	0	0	0.059	0	0.036	0.016	0	0.022	0	0	0	0	0	0	0	0.046	0.014	0.015	0.015	0.016	0	0	0	0	0	0	0	0.014	0.029	0	0	0	0	0	0	0.014	0.031	0.056	0	0	0	0	0	0	0	0	0	0
FN1_a2Bb3 complex	0	0	0	0.003	0.003	0.002	0	0.002	0.002	0.188	0.005	0	0	0	0	0	0.003	0	0	0	0	0	0	0	0	0	0	0	0	0	0	0	0	0	0	0	0.001	0	0.003	0.002	0	0	0	0	0	0.003	0.003	0.002	0
PLG_a2Bb3 complex	0	0	0	0.002	0.002	0.001	0	0.001	0.001	0.187	0.005	0	0	0	0	0	0.002	0	0	0	0	0	0	0	0	0	0	0	0	0	0	0	0	0	0	0	0	0	0.002	0.002	0	0	0	0	0	0	0	0	0
THBS1_a2Bb3 complex	0	0	0	0.002	0.002	0.001	0	0.001	0.001	0.187	0.005	0	0	0	0	0	0.002	0	0	0	0	0	0	0	0	0	0	0	0	0	0	0	0	0	0	0	0	0	0.002	0.002	0	0	0	0	0	0	0	0	0
CD40LG_a2Bb3 complex	0	0	0	0.002	0.002	0.001	0	0.001	0.001	0.187	0.005	0	0	0	0	0	0.002	0	0	0	0	0	0	0	0	0	0	0	0	0	0	0	0	0	0	0	0	0	0.002	0.002	0	0	0	0	0	0	0	0	0
FN1_a4b1 complex	0.041	0.054	0.112	0.003	0.009	0.002	0.027	0.084	0.02	0.006	0.095	0.056	0.01	0.007	0.015	0.055	0.002	0.111	0.018	0.036	0.042	0.023	0.027	0	0.049	0.003	0.157	0.048	0.108	0.006	0.032	0.059	0.041	0	0.083	0.047	0.041	0.023	0.007	0.105	0.047	0.139	0.041	0.055	0.113	0.003	0.009	0.002	0.027
SPP1_a4b1 complex	0.04	0.054	0.111	0.002	0.008	0.001	0.026	0.083	0.019	0.005	0.094	0.055	0.009	0.006	0.014	0.055	0.001	0.11	0.017	0.036	0.042	0.023	0.026	0	0.048	0.002	0.156	0.047	0.108	0.006	0.031	0.058	0.04	0	0.082	0.046	0.04	0.022	0.006	0.104	0.046	0.138	0	0	0	0	0	0	0
TNC_a4b1 complex	0	0	0	0	0	0	0	0	0	0	0	0	0	0	0	0	0	0	0	0	0	0	0	0	0	0	0	0	0	0	0	0	0	0	0	0	0	0	0	0	0	0	0	0	0	0	0	0	0
PLAUR_a4b1 complex	0.066	0.08	0.138	0.028	0.034	0.027	0.053	0.11	0.045	0.031	0.12	0.081	0.036	0.032	0.041	0.081	0.028	0.137	0.043	0.062	0.068	0.049	0.053	0	0.075	0.029	0.182	0.074	0.134	0.032	0.057	0.085	0.066	0	0.109	0.072	0.067	0.048	0.032	0.131	0.073	0.164	0.041	0.054	0.112	0.003	0.009	0.002	0.027
VCAM1_a4b1 complex	0.04	0.054	0.112	0.002	0.008	0.001	0.027	0.084	0.019	0.005	0.094	0.055	0.009	0.006	0.015	0.055	0.002	0.11	0.017	0.036	0.042	0.023	0.027	0	0.049	0.003	0.156	0.047	0.108	0.006	0.031	0.059	0.04	0	0.083	0.046	0.041	0.022	0.006	0.105	0.047	0.138	0.04	0.054	0.112	0.002	0.008	0.001	0.026
JAM2_a4b1 complex	0.04	0.054	0.112	0.002	0.008	0.001	0.027	0.084	0.019	0.005	0.094	0.055	0.009	0.006	0.015	0.055	0.002	0.11	0.017	0.036	0.042	0.023	0.027	0	0.049	0.003	0.156	0.047	0.108	0.006	0.031	0.059	0.04	0	0.083	0.046	0.041	0.022	0.006	0.105	0.047	0.138	0.041	0.055	0.113	0.003	0.009	0.002	0.028
FN1_a4b7 complex	0.011	0	0.004	0.004	0.014	0.002	0.01	0.003	0.011	0	0.005	0.028	0.013	0.007	0	0	0.003	0.064	0.013	0.003	0.011	0.02	0.01	0	0.044	0.013	0.007	0.002	0.003	0	0.009	0	0	0	0.017	0.019	0.009	0.012	0	0.007	0.044	0.003	0.011	0	0.004	0.005	0.014	0.002	0.01
VCAM1_a4b7 complex	0.01	0	0.003	0.004	0.013	0.002	0.009	0.003	0.011	0	0.005	0.028	0.013	0.006	0	0	0.003	0.063	0.013	0.003	0.011	0.02	0.01	0	0.043	0.013	0.006	0.002	0.003	0	0.008	0	0	0	0.016	0.019	0.009	0.012	0	0.006	0.043	0.002	0.01	0	0.003	0.004	0.013	0.002	0.009
FN1_a5b1 complex	0.002	0.018	0.008	0	0	0.005	0.008	0.008	0.009	0	0.005	0.004	0	0	0	0	0.006	0.01	0.007	0.007	0.008	0.003	0	0.008	0.015	0	0	0	0.005	0.006	0	0.006	0.009	0	0.006	0.019	0.012	0.012	0.003	0.01	0.011	0	0.002	0.018	0.008	0	0	0.005	0.009
CD40LG_a5b1 complex	0.001	0.017	0.007	0	0	0.004	0.008	0.007	0.008	0	0.005	0.003	0	0	0	0	0.005	0.009	0.006	0.006	0.007	0.003	0	0.007	0.014	0	0	0	0.005	0.006	0	0.005	0.008	0	0.006	0.019	0.012	0.011	0.002	0.009	0.011	0	0	0	0	0	0	0	0
FBN1_a5b1 complex	0.001	0.017	0.007	0	0	0.004	0.008	0.007	0.008	0	0.005	0.003	0	0	0	0	0.005	0.009	0.006	0.006	0.007	0.003	0	0.007	0.014	0	0	0	0.005	0.006	0	0.005	0.008	0	0.006	0.019	0.012	0.011	0.002	0.009	0.011	0	0.001	0.017	0.008	0	0	0.004	0.008
FN1_a8b1 complex	0	0	0	0	0.006	0.001	0	0	0	0	0	0	0.004	0.007	0	0	0.001	0	0	0	0	0	0.004	0	0	0.005	0	0	0	0.022	0.005	0	0	0	0	0	0	0.012	0	0.002	0	0	0	0	0	0	0.006	0.002	0
TNC_a8b1 complex	0	0	0	0	0	0	0	0	0	0	0	0	0	0	0	0	0	0	0	0	0	0	0	0	0	0	0	0	0	0	0	0	0	0	0	0	0	0	0	0	0	0	0	0	0	0	0	0	0
FN1_aVb1 complex	0.003	0.003	0	0.02	0	0.014	0	0.003	0.014	0	0.005	0.004	0	0	0	0.004	0.021	0.004	0	0.004	0	0.003	0	0	0.006	0	0.007	0.002	0.003	0.017	0	0.004	0	0.003	0	0	0.004	0.04	0.01	0.011	0.003	0.004	0.003	0.003	0	0.02	0	0.014	0
FN1_aVb5 complex	0.003	0.003	0	0.02	0	0.014	0	0.003	0.014	0	0.005	0.004	0	0	0	0.004	0.021	0.004	0	0.004	0	0.003	0	0	0.006	0	0.007	0.002	0.003	0.017	0	0.004	0	0.003	0	0	0.004	0.04	0.01	0.011	0.003	0.004	0.003	0.003	0	0.02	0	0.014	0
LAMC1_a6b1 complex	0	0.005	0.007	0	0.008	0.003	0.007	0.009	0	0.012	0.007	0.013	0.01	0	0	0.005	0.003	0.009	0.005	0.005	0	0.003	0.01	0	0	0.007	0	0.003	0.003	0.008	0.023	0.006	0.01	0.004	0	0.012	0.003	0	0	0.007	0.003	0	0	0.003	0.005	0	0.006	0.001	0.005
LAMC1_a7b1 complex	0	0	0	0	0	0	0	0.003	0	0	0	0	0	0	0	0	0.003	0	0.003	0.003	0	0	0	0	0	0	0.005	0	0.003	0.018	0	0	0	0	0	0	0.003	0	0	0.005	0	0	0	0	0	0	0	0	0
CDH1_aEb7 complex	0.01	0	0.003	0.003	0.013	0.001	0.009	0.002	0.011	0	0.005	0.027	0.013	0.006	0	0	0.002	0.063	0.012	0.002	0.01	0.019	0.01	0	0.043	0.013	0.006	0.001	0.002	0	0.008	0	0	0	0.016	0.019	0.009	0.011	0	0.006	0.043	0.002	0	0	0	0	0	0	0
SPP1_a9b1 complex	0	0	0.002	0	0	0.001	0	0.005	0.002	0	0.013	0	0	0	0.01	0	0.001	0	0	0	0.003	0.001	0	0	0	0	0	0	0	0.021	0	0	0	0.005	0	0	0.001	0	0	0.004	0.001	0	0	0	0	0	0	0	0
TNC_a9b1 complex	0	0	0	0	0	0	0	0	0	0	0	0	0	0	0	0	0	0	0	0	0	0	0	0	0	0	0	0	0	0	0	0	0	0	0	0	0	0	0	0	0	0	0	0	0	0	0	0	0
VCAM1_a9b1 complex	0	0	0.002	0	0	0.001	0	0.005	0.002	0	0.013	0	0	0	0.01	0	0.002	0	0	0	0.003	0.001	0	0	0	0	0	0	0	0.022	0	0	0	0.005	0	0	0.001	0	0	0.005	0.001	0	0	0	0.002	0	0	0.001	0
THY1_aMb2 complex	0	0	0	0	0	0	0	0	0	0	0	0	0	0	0	0	0	0	0	0	0	0	0	0	0	0	0	0	0	0	0	0	0	0	0	0	0	0	0	0	0	0	0	0	0	0	0	0	0
FCER2_aMb2 complex	0	0	0	0	0	0	0	0	0	0	0	0	0	0	0	0	0	0	0	0	0	0	0	0	0	0	0	0	0	0	0	0	0	0	0	0	0	0	0	0	0	0	0	0	0	0	0	0	0
ICAM1_aMb2 complex	0.005	0.004	0.005	0	0	0.004	0.01	0.006	0.026	0.022	0.025	0.005	0	0	0.013	0.009	0.004	0.025	0.037	0.006	0.028	0	0	0	0	0	0.008	0	0.009	0	0	0	0	0.038	0.014	0.06	0.039	0	0	0.013	0.012	0	0	0	0	0	0	0	0
C3_aMb2 complex	0.002	0.001	0.002	0	0	0.001	0.007	0.003	0.022	0.019	0.021	0.002	0	0	0.01	0.006	0.001	0.021	0.034	0.003	0.025	0	0	0	0	0	0.005	0	0.005	0	0	0	0	0.035	0.011	0.057	0.036	0	0	0.01	0.009	0	0	0	0	0	0	0	0
GP1BA_aMb2 complex	0.002	0.001	0.002	0	0	0.001	0.007	0.003	0.022	0.019	0.021	0.002	0	0	0.01	0.006	0.001	0.021	0.034	0.003	0.025	0	0	0	0	0	0.005	0	0.005	0	0	0	0	0.035	0.011	0.057	0.036	0	0	0.01	0.009	0	0.002	0.001	0.002	0	0	0.001	0.007
JAM3_aMb2 complex	0.002	0.001	0.002	0	0	0.001	0.007	0.003	0.022	0.019	0.021	0.002	0	0	0.01	0.006	0.001	0.021	0.034	0.003	0.025	0	0	0	0	0	0.005	0	0.005	0	0	0	0	0.035	0.011	0.057	0.036	0	0	0.01	0.009	0	0.002	0.001	0.002	0	0	0.001	0.007
THY1_aXb2 complex	0	0	0	0	0	0	0	0	0	0	0	0	0	0	0	0	0	0	0	0	0	0	0	0	0	0	0	0	0	0	0	0	0	0	0	0	0	0	0	0	0	0	0	0	0	0	0	0	0
FCER2_aXb2 complex	0	0	0	0	0	0	0	0	0	0	0	0	0	0	0	0	0	0	0	0	0	0	0	0	0	0	0	0	0	0	0	0	0	0	0	0	0	0	0	0	0	0	0	0	0	0	0	0	0
ICAM1_aXb2 complex	0.007	0.004	0	0	0	0.004	0.007	0.007	0.058	0.008	0.042	0.015	0	0	0	0.012	0.005	0.059	0.029	0.02	0.055	0.005	0	0	0.037	0	0.009	0	0.164	0	0	0.005	0	0.005	0	0.109	0.082	0.025	0.007	0.02	0.112	0.005	0	0	0	0	0	0	0
ACVR1_BMPR2_BMP5	0.004	0	0	0.034	0	0.059	0.02	0.003	0.033	0	0	0.005	0	0	0	0.006	0.065	0.004	0	0	0	0.004	0	0.01	0.009	0	0	0	0.004	0.014	0	0	0	0	0	0.012	0.004	0.036	0.061	0	0	0	0.001	0	0	0.032	0	0.057	0.018
ACVR_1A2A receptor_BMP5	0.004	0	0	0.034	0	0.059	0.02	0.003	0.033	0	0	0.005	0	0	0	0.006	0.065	0.004	0	0	0	0.004	0	0.01	0.009	0	0	0	0.004	0.014	0	0	0	0	0	0.012	0.004	0.036	0.061	0	0	0	0.001	0	0	0.032	0	0.057	0.018
ACVR_1A2B receptor_BMP5	0.003	0	0	0.034	0	0.059	0.02	0.003	0.032	0	0	0.004	0	0	0	0.005	0.065	0.003	0	0	0	0.003	0	0.009	0.008	0	0	0	0.003	0.013	0	0	0	0	0	0.012	0.003	0.035	0.06	0	0	0	0.002	0	0	0.033	0	0.058	0.019
BMPR1A_BMPR2_BMP5	0	0	0	0	0	0	0	0	0	0	0	0	0	0	0	0	0	0	0	0	0	0	0	0	0	0	0	0	0	0	0	0	0	0	0	0	0	0	0	0	0	0	0	0	0	0	0	0	0
BMR1A_ACR2A_BMP5	0	0	0	0	0	0	0	0	0	0	0	0	0	0	0	0	0	0	0	0	0	0	0	0	0	0	0	0	0	0	0	0	0	0	0	0	0	0	0	0	0	0	0	0	0	0	0	0	0
BMR1A_AVR2B_BMP5	0	0	0	0	0	0	0	0	0	0	0	0	0	0	0	0	0	0	0	0	0	0	0	0	0	0	0	0	0	0	0	0	0	0	0	0	0	0	0	0	0	0	0	0	0	0	0	0	0
ACVR1_BMPR2_BMP6	0.004	0	0	0	0.005	0	0	0.004	0	0.073	0	0	0.012	0	0	0	0.003	0	0	0	0	0	0.008	0	0	0.013	0	0	0	0.014	0.007	0	0	0	0	0	0	0	0	0	0.004	0	0.001	0	0	0	0.003	0	0
ACVR_1A2A receptor_BMP6	0.004	0	0	0	0.005	0	0	0.004	0	0.073	0	0	0.012	0	0	0	0.003	0	0	0	0	0	0.008	0	0	0.013	0	0	0	0.014	0.007	0	0	0	0	0	0	0	0	0	0.004	0	0.001	0	0	0	0.003	0	0
ACVR_1A2B receptor_BMP6	0.003	0	0	0	0.004	0	0	0.003	0	0.073	0	0	0.011	0	0	0	0.003	0	0	0	0	0	0.007	0	0	0.013	0	0	0	0.013	0.006	0	0	0	0	0	0	0	0	0	0.003	0	0.002	0	0	0	0.004	0	0
BMPR1A_BMPR2_BMP6	0	0	0	0	0	0	0	0	0	0	0	0	0	0	0	0	0	0	0	0	0	0	0	0	0	0	0	0	0	0	0	0	0	0	0	0	0	0	0	0	0	0	0	0	0	0	0	0	0
BMR1A_ACR2A_BMP6	0	0	0	0	0	0	0	0	0	0	0	0	0	0	0	0	0	0	0	0	0	0	0	0	0	0	0	0	0	0	0	0	0	0	0	0	0	0	0	0	0	0	0	0	0	0	0	0	0
BMR1A_AVR2B_BMP6	0	0	0	0	0	0	0	0	0	0	0	0	0	0	0	0	0	0	0	0	0	0	0	0	0	0	0	0	0	0	0	0	0	0	0	0	0	0	0	0	0	0	0	0	0	0	0	0	0
ACVR1_BMPR2_BMP8A	0.004	0	0	0	0	0.003	0	0.003	0	0	0	0	0	0	0	0	0	0	0	0	0	0	0	0.03	0	0	0	0	0	0.045	0.007	0	0	0	0	0	0.003	0	0	0.006	0	0	0.001	0	0	0	0	0.001	0
ACVR_1A2A receptor_BMP8A	0.004	0	0	0	0	0.003	0	0.003	0	0	0	0	0	0	0	0	0	0	0	0	0	0	0	0.03	0	0	0	0	0	0.045	0.007	0	0	0	0	0	0.003	0	0	0.006	0	0	0.001	0	0	0	0	0.001	0
ACVR_1A2B receptor_BMP8A	0.003	0	0	0	0	0.003	0	0.003	0	0	0	0	0	0	0	0	0	0	0	0	0	0	0	0.03	0	0	0	0	0	0.045	0.006	0	0	0	0	0	0.003	0	0	0.005	0	0	0.002	0	0	0	0	0.002	0
BMPR1A_BMPR2_BMP8A	0	0	0	0	0	0	0	0	0	0	0	0	0	0	0	0	0	0	0	0	0	0	0	0	0	0	0	0	0	0	0	0	0	0	0	0	0	0	0	0	0	0	0	0	0	0	0	0	0
BMR1A_ACR2A_BMP8A	0	0	0	0	0	0	0	0	0	0	0	0	0	0	0	0	0	0	0	0	0	0	0	0	0	0	0	0	0	0	0	0	0	0	0	0	0	0	0	0	0	0	0	0	0	0	0	0	0
BMR1A_AVR2B_BMP8A	0	0	0	0	0	0	0	0	0	0	0	0	0	0	0	0	0	0	0	0	0	0	0	0	0	0	0	0	0	0	0	0	0	0	0	0	0	0	0	0	0	0	0	0	0	0	0	0	0
ACVR_1A2A receptor_INHBA	0	0	0.005	0	0	0.004	0	0	0	0	0	0	0	0	0.037	0	0.004	0	0.005	0	0	0	0	0	0	0	0	0	0	0.022	0	0	0	0.012	0	0	0.003	0	0	0.006	0	0	0	0	0.002	0	0	0.001	0
ACVR_1A2B receptor_INHBA	0	0	0.004	0	0	0.003	0	0	0	0	0	0	0	0	0.036	0	0.003	0	0.004	0	0	0	0	0	0	0	0	0	0	0.021	0	0	0	0.011	0	0	0.003	0	0	0.005	0	0	0	0	0.003	0	0	0.002	0
ACVR_1B2A receptor_INHBA	0	0	0.002	0	0	0.001	0	0	0	0	0	0	0	0	0.034	0	0.001	0	0.002	0	0	0	0	0	0	0	0	0	0	0.02	0	0	0	0.009	0	0	0.001	0	0	0.003	0	0	0	0	0	0	0	0	0
ACVR_1B2B receptor_INHBA	0	0	0.004	0	0	0.003	0	0	0	0	0	0	0	0	0.036	0	0.003	0	0.004	0	0	0	0	0	0	0	0	0	0	0.021	0	0	0	0.011	0	0	0.003	0	0	0.005	0	0	0	0	0.003	0	0	0.002	0
ACVR_1C2A receptor_INHBA	0	0	0	0	0	0	0	0	0	0	0	0	0	0	0	0	0	0	0	0	0	0	0	0	0	0	0	0	0	0	0	0	0	0	0	0	0	0	0	0	0	0	0	0	0	0	0	0	0
ACVR_1C2B receptor_INHBA	0	0	0	0	0	0	0	0	0	0	0	0	0	0	0	0	0	0	0	0	0	0	0	0	0	0	0	0	0	0	0	0	0	0	0	0	0	0	0	0	0	0	0	0	0	0	0	0	0
ACVR_1A2A receptor_INHBB	0.004	0	0.005	0.019	0	0.036	0.011	0	0.021	0	0	0	0	0	0	0.006	0.029	0.004	0.004	0	0	0	0	0.01	0	0	0	0	0	0.024	0	0	0	0	0	0.012	0.004	0.014	0.031	0	0	0	0.001	0	0.002	0.016	0	0.033	0.008
ACVR_1A2B receptor_INHBB	0.003	0	0.004	0.018	0	0.035	0.01	0	0.02	0	0	0	0	0	0	0.005	0.028	0.003	0.003	0	0	0	0	0.009	0	0	0	0	0	0.024	0	0	0	0	0	0.012	0.003	0.013	0.03	0	0	0	0.002	0	0.003	0.017	0	0.034	0.009
ACVR_1B2A receptor_INHBB	0.001	0	0.002	0.016	0	0.033	0.008	0	0.019	0	0	0	0	0	0	0.003	0.027	0.001	0.002	0	0	0	0	0.008	0	0	0	0	0	0.022	0	0	0	0	0	0.01	0.001	0.012	0.028	0	0	0	0	0	0	0	0	0	0
ACVR_1B2B receptor_INHBB	0.003	0	0.004	0.018	0	0.035	0.01	0	0.02	0	0	0	0	0	0	0.005	0.028	0.003	0.003	0	0	0	0	0.009	0	0	0	0	0	0.024	0	0	0	0	0	0.012	0.003	0.013	0.03	0	0	0	0.002	0	0.003	0.017	0	0.034	0.009
ACVR_1C2A receptor_INHBB	0	0	0	0	0	0	0	0	0	0	0	0	0	0	0	0	0	0	0	0	0	0	0	0	0	0	0	0	0	0	0	0	0	0	0	0	0	0	0	0	0	0	0	0	0	0	0	0	0
ACVR_1C2B receptor_INHBB	0	0	0	0	0	0	0	0	0	0	0	0	0	0	0	0	0	0	0	0	0	0	0	0	0	0	0	0	0	0	0	0	0	0	0	0	0	0	0	0	0	0	0	0	0	0	0	0	0
BMPR1A_BMPR2_BMP2	0	0	0	0	0	0	0	0	0	0	0	0	0	0	0	0	0	0	0	0	0	0	0	0	0	0	0	0	0	0	0	0	0	0	0	0	0	0	0	0	0	0	0	0	0	0	0	0	0
BMR1A_ACR2A_BMP2	0	0	0	0	0	0	0	0	0	0	0	0	0	0	0	0	0	0	0	0	0	0	0	0	0	0	0	0	0	0	0	0	0	0	0	0	0	0	0	0	0	0	0	0	0	0	0	0	0
BMR1A_AVR2B_BMP2	0	0	0	0	0	0	0	0	0	0	0	0	0	0	0	0	0	0	0	0	0	0	0	0	0	0	0	0	0	0	0	0	0	0	0	0	0	0	0	0	0	0	0	0	0	0	0	0	0
BMPR1A_BMPR2_BMP4	0	0	0	0	0	0	0	0	0	0	0	0	0	0	0	0	0	0	0	0	0	0	0	0	0	0	0	0	0	0	0	0	0	0	0	0	0	0	0	0	0	0	0	0	0	0	0	0	0
BMR1A_ACR2A_BMP4	0	0	0	0	0	0	0	0	0	0	0	0	0	0	0	0	0	0	0	0	0	0	0	0	0	0	0	0	0	0	0	0	0	0	0	0	0	0	0	0	0	0	0	0	0	0	0	0	0
BMR1A_AVR2B_BMP4	0	0	0	0	0	0	0	0	0	0	0	0	0	0	0	0	0	0	0	0	0	0	0	0	0	0	0	0	0	0	0	0	0	0	0	0	0	0	0	0	0	0	0	0	0	0	0	0	0
BMPR1A_BMPR2_GDF7	0	0	0	0	0	0	0	0	0	0	0	0	0	0	0	0	0	0	0	0	0	0	0	0	0	0	0	0	0	0	0	0	0	0	0	0	0	0	0	0	0	0	0	0	0	0	0	0	0
BMR1A_ACR2A_GDF7	0	0	0	0	0	0	0	0	0	0	0	0	0	0	0	0	0	0	0	0	0	0	0	0	0	0	0	0	0	0	0	0	0	0	0	0	0	0	0	0	0	0	0	0	0	0	0	0	0
BMR1A_AVR2B_GDF7	0	0	0	0	0	0	0	0	0	0	0	0	0	0	0	0	0	0	0	0	0	0	0	0	0	0	0	0	0	0	0	0	0	0	0	0	0	0	0	0	0	0	0	0	0	0	0	0	0
ACVR_1B2A receptor_GDF11	0.001	0.011	0.005	0.002	0	0.003	0	0.006	0.003	0	0	0.003	0	0	0	0	0.003	0.003	0	0.001	0.003	0.001	0.002	0	0	0	0.006	0.004	0.001	0.006	0	0.001	0.009	0	0.006	0	0.001	0.012	0.003	0.006	0	0.006	0	0	0	0	0	0	0
ACVR_1B2B receptor_GDF11	0.003	0.012	0.007	0.004	0	0.005	0	0.008	0.005	0	0	0.005	0	0	0	0	0.005	0.005	0	0.003	0.005	0.003	0.004	0	0	0	0.008	0.006	0.003	0.008	0	0.003	0.011	0	0.008	0	0.003	0.013	0.004	0.008	0	0.007	0.002	0.012	0.006	0.003	0	0.004	0
ACVR_1B2B receptor_GDF10	0	0	0	0.007	0	0.004	0	0.003	0.004	0	0	0	0	0	0	0	0.005	0	0	0	0	0	0	0	0	0	0	0	0	0.013	0	0	0	0	0	0	0.003	0	0.006	0	0	0	0	0	0	0.006	0	0.003	0
CD8 receptor_LCK	0	0	0	0	0	0	0	0	0	0	0	0	0	0	0	0	0	0	0	0	0	0	0	0	0	0	0	0	0	0	0	0	0	0	0	0	0	0	0	0	0	0	0	0	0	0	0	0	0
CD94:NKG2A_HLA-E	0.042	0.097	0.055	0.082	0.006	0.078	0.059	0.056	0.096	0.546	0.104	0.151	0.008	0	0.031	0.024	0.078	0.184	0.066	0.036	0.084	0.037	0.014	0.048	0.035	0.004	0.045	0.002	0.177	0.04	0.015	0.022	0.042	0.041	0.147	0.13	0.094	0.044	0.079	0.059	0.073	0.008	0	0	0	0	0	0	0
CD94:NKG2C_HLA-E	0	0	0	0	0	0	0	0	0	0	0	0	0	0	0	0	0	0	0	0	0	0	0	0	0	0	0	0	0	0	0	0	0	0	0	0	0	0	0	0	0	0	0	0	0	0	0	0	0
CD94:NKG2E_HLA-E	0.042	0.097	0.055	0.082	0.006	0.078	0.059	0.056	0.096	0.546	0.104	0.151	0.008	0	0.031	0.024	0.078	0.184	0.066	0.036	0.084	0.037	0.014	0.048	0.035	0.004	0.045	0.002	0.177	0.04	0.015	0.022	0.042	0.041	0.147	0.13	0.094	0.044	0.079	0.059	0.073	0.008	0	0	0	0	0	0	0
CNTF-1R_CLCF1	0	0	0	0	0	0.002	0.005	0	0.001	0	0	0.002	0	0	0	0	0.001	0.004	0.003	0.001	0	0.001	0	0	0.006	0	0	0.001	0.005	0	0.004	0	0.002	0	0	0	0.001	0	0.002	0	0.001	0	0	0	0	0	0	0	0
ICAM1_aLb2 complex	0.021	0.006	0.012	0	0	0.004	0.021	0.009	0.015	0	0.029	0.033	0.006	0	0.008	0.009	0.004	0.104	0.035	0.025	0.027	0.024	0.005	0	0.03	0	0.009	0.004	0.097	0.009	0.007	0.005	0.012	0.01	0.019	0.124	0.033	0	0.005	0.019	0.027	0	0	0	0	0	0	0	0
ICAM2_aLb2 complex	0.019	0.005	0.01	0	0	0.003	0.019	0.008	0.014	0	0.027	0.032	0.004	0	0.006	0.007	0.002	0.103	0.033	0.023	0.025	0.022	0.003	0	0.028	0	0.008	0.002	0.096	0.007	0.006	0.004	0.01	0.008	0.018	0.122	0.031	0	0.004	0.017	0.025	0	0.023	0.009	0.014	0	0	0.007	0.023
ICAM3_aLb2 complex	0.054	0.04	0.045	0	0	0.038	0.054	0.043	0.049	0	0.062	0.067	0.039	0	0.042	0.042	0.037	0.138	0.068	0.059	0.06	0.058	0.039	0	0.064	0	0.043	0.037	0.131	0.042	0.041	0.039	0.045	0.044	0.053	0.157	0.066	0	0.039	0.052	0.06	0	0.034	0.019	0.025	0	0	0.017	0.034
ICAM4_aLb2 complex	0.023	0.009	0.015	0	0	0.007	0.023	0.012	0.018	0	0.032	0.036	0.009	0	0.011	0.012	0.006	0.107	0.037	0.028	0.03	0.027	0.008	0	0.033	0	0.012	0.006	0.1	0.011	0.01	0.008	0.014	0.013	0.022	0.126	0.035	0	0.008	0.022	0.03	0	0.018	0.003	0.009	0	0	0.001	0.018
F11R_aLb2 complex	0.019	0.005	0.01	0	0	0.003	0.019	0.008	0.014	0	0.027	0.032	0.004	0	0.006	0.007	0.002	0.103	0.033	0.023	0.025	0.022	0.003	0	0.028	0	0.008	0.002	0.096	0.007	0.006	0.004	0.01	0.008	0.018	0.122	0.031	0	0.004	0.017	0.025	0	0.018	0.004	0.009	0	0	0.002	0.018
IL1 receptor_IL1B	0.001	0.009	0.003	0	0	0.001	0.012	0.064	0.018	0	0.084	0.003	0	0	0	0	0.001	0.001	0.012	0.005	0.014	0.003	0	0	0	0	0.009	0.002	0.017	0	0	0.007	0.007	0	0	0.009	0.025	0.011	0	0.019	0.065	0.004	0	0	0	0	0	0	0
IL1 receptor inhibitor_IL1B	0	0	0	0	0	0	0	0	0	0	0	0	0	0	0	0	0	0	0	0	0	0	0	0	0	0	0	0	0	0	0	0	0	0	0	0	0	0	0	0	0	0	0	0	0	0	0	0	0
IL1 receptor_IL1RN	0.001	0	0	0	0	0	0.003	0.001	0.01	0	0.005	0	0.003	0	0	0	0	0.001	0.02	0.006	0.016	0.001	0	0	0	0	0	0	0.009	0	0	0.001	0	0.005	0	0	0.026	0.011	0	0.002	0.032	0.002	0	0	0	0	0	0	0
IL1 receptor inhibitor_IL1RN	0	0	0	0	0	0	0	0	0	0	0	0	0	0	0	0	0	0	0	0	0	0	0	0	0	0	0	0	0	0	0	0	0	0	0	0	0	0	0	0	0	0	0	0	0	0	0	0	0
IL10 receptor_IL10	0	0	0	0	0	0.004	0	0.005	0	0	0	0	0	0	0	0	0	0	0	0	0	0.005	0	0	0	0	0	0	0.005	0	0	0	0.006	0	0	0	0.006	0	0	0	0	0	0	0	0	0	0	0.001	0
IL15 receptor_IL15	0	0	0	0	0	0	0	0	0	0	0	0	0	0	0	0	0	0	0	0	0	0	0	0	0	0	0	0	0	0	0	0	0	0	0	0	0	0	0	0	0	0	0	0	0	0	0	0	0
IL18 receptor_IL18	0	0	0	0	0	0	0	0	0	0	0	0	0	0	0	0	0	0	0	0	0	0	0	0	0	0	0	0	0	0	0	0	0	0	0	0	0	0	0	0	0	0	0	0	0	0	0	0	0
IL6 receptor_IL6	0	0	0	0	0	0.035	0.031	0.027	0.03	0	0	0	0	0	0	0	0.027	0.027	0	0.027	0	0	0	0	0	0	0	0	0.027	0	0	0	0	0	0	0	0.027	0	0.029	0	0	0	0	0	0	0	0	0	0
IL7 receptor_IL7	0	0	0	0.017	0	0.035	0.025	0.006	0.019	0	0.005	0.002	0	0.002	0	0.003	0.03	0.001	0.001	0.002	0	0.001	0	0.007	0	0	0.003	0.007	0.001	0.006	0	0.002	0	0	0	0	0.001	0.011	0.026	0.004	0.002	0.004	0	0	0	0.026	0	0.044	0.033
LIFR_OSM	0.001	0.003	0.002	0	0	0.001	0.003	0.006	0.011	0	0.009	0.002	0	0	0	0.003	0.001	0.003	0.021	0.009	0.007	0.002	0	0	0	0	0.08	0.004	0.004	0	0	0.003	0	0	0	0.01	0.017	0	0	0.008	0.017	0.004	0	0	0	0	0	0	0
OSMR_OSM	0	0	0	0	0	0	0	0	0	0	0	0	0	0	0	0	0	0	0	0	0	0	0	0	0	0	0	0	0	0	0	0	0	0	0	0	0	0	0	0	0	0	0	0	0	0	0	0	0
GDF11_TGFR_AVR2A	0.006	0.007	0.006	0.005	0	0.01	0.009	0.005	0.011	0	0.005	0.002	0	0.002	0.005	0.006	0.017	0.021	0.009	0.008	0.007	0.007	0.002	0.007	0.011	0	0.006	0.003	0.004	0.022	0	0.004	0.003	0.018	0.014	0.019	0.01	0	0.02	0.006	0.007	0.005	0.015	0.017	0.015	0.014	0	0.019	0.019
GDF11_TGFR_AVR2B	0.003	0.002	0.002	0.005	0	0.004	0	0.002	0.001	0.005	0	0.005	0	0	0	0	0.004	0.002	0	0	0	0.002	0	0	0.006	0	0	0.001	0.002	0.006	0	0	0.002	0	0	0	0.001	0	0	0.002	0.001	0.007	0.012	0.012	0.011	0.014	0	0.013	0
TGFB1_TGFbeta receptor1	0.019	0.021	0.02	0.019	0	0.024	0.023	0.019	0.024	0	0.018	0.015	0	0.016	0.019	0.019	0.031	0.034	0.023	0.022	0.021	0.02	0.016	0.021	0.025	0	0.02	0.017	0.018	0.035	0	0.018	0.017	0.032	0.028	0.032	0.023	0	0.034	0.019	0.02	0.019	0	0	0	0	0	0	0
TGFB3_TGFbeta receptor1	0.006	0.008	0.006	0.005	0	0.01	0.009	0.005	0.011	0	0.005	0.002	0	0.003	0.005	0.006	0.017	0.021	0.01	0.008	0.007	0.007	0.002	0.008	0.011	0	0.006	0.003	0.004	0.022	0	0.004	0.004	0.018	0.014	0.019	0.01	0	0.02	0.006	0.007	0.006	0	0	0	0	0	0	0
TGFB1_TGFbeta receptor2	0.017	0.015	0	0.033	0	0.029	0.023	0.017	0.023	0.035	0.018	0.018	0	0	0	0	0.03	0.015	0.015	0.019	0.016	0.015	0	0.021	0	0	0.017	0.015	0.017	0.03	0	0	0.015	0	0	0.023	0.016	0.025	0.033	0	0.016	0	0	0	0	0	0	0	0
TGFB3_TGFbeta receptor2	0.004	0.001	0	0.019	0	0.015	0.009	0.003	0.01	0.022	0.005	0.005	0	0	0	0	0.017	0.001	0.002	0.006	0.003	0.002	0	0.008	0	0	0.004	0.001	0.003	0.016	0	0	0.002	0	0	0.01	0.003	0.012	0.019	0	0.003	0	0	0	0	0	0	0	0
GDF9_TGFR_BMPR2	0.006	0.008	0.009	0.018	0	0.022	0.006	0.003	0.013	0	0.005	0.005	0	0	0	0.004	0.018	0.005	0.003	0.002	0.005	0.006	0.003	0	0	0	0	0.003	0.005	0.012	0.009	0.002	0.003	0.003	0	0.019	0.006	0	0.025	0.004	0.006	0.004	0	0	0	0	0	0	0
IFNG_Type II IFNR	0	0	0	0	0	0	0	0	0	0	0	0	0	0	0	0	0	0	0	0	0	0	0	0	0	0	0	0	0	0	0	0	0	0	0	0	0	0	0	0	0	0	0	0	0	0	0	0	0
PDGFR complex_PDGFD	0	0	0	0	0	0	0	0	0	0	0	0	0	0	0	0	0	0	0	0	0	0	0	0	0	0	0	0	0	0	0	0	0	0	0	0	0	0	0	0	0	0	0	0	0	0	0	0	0
ARTN_RET receptor 1	0.004	0	0	0	0	0.001	0	0.001	0	0.008	0	0	0	0	0	0	0.001	0	0.002	0.002	0	0	0	0	0	0	0	0	0.002	0	0	0	0	0	0	0	0	0	0.003	0	0	0	0	0	0	0	0	0	0
CD47_SIRB1 complex	0.072	0	0.061	0.061	0.061	0.06	0.064	0.06	0.075	0	0.081	0	0.062	0	0.069	0	0.06	0.06	0.092	0.076	0.1	0.067	0	0	0.075	0	0.062	0	0.094	0	0	0.063	0	0.084	0.065	0.105	0.105	0.092	0	0.064	0.078	0.061	0.07	0	0.059	0.059	0.059	0.058	0.062
[truncated: 1,715 more columns]

## Sheet: p_values
interacting_pair	0|0	0|1	0|2	0|3	0|4	0|5	0|6	0|7	0|8	0|9	0|10	0|11	0|12	0|13	0|14	0|15	0|16	0|17	0|18	0|19	0|20	0|21	0|22	0|23	0|24	0|25	0|26	0|27	0|28	0|29	0|30	0|31	0|32	0|33	0|34	0|35	0|36	0|37	0|38	0|39	0|40	0|41	1|0	1|1	1|2	1|3	1|4	1|5	1|6
HLA-DPA1_TNFSF9	1.0	1.0	1.0	1.0	1.0	1.0	1.0	1.0	1.0	1.0	1.0	1.0	1.0	1.0	1.0	1.0	1.0	1.0	1.0	1.0	1.0	1.0	1.0	1.0	1.0	1.0	1.0	1.0	1.0	1.0	1.0	1.0	1.0	1.0	1.0	1.0	1.0	1.0	1.0	1.0	1.0	1.0	1.0	1.0	1.0	1.0	1.0	1.0	1.0
PVR_TNFSF9	1.0	1.0	1.0	1.0	1.0	1.0	1.0	1.0	1.0	1.0	1.0	1.0	1.0	1.0	1.0	1.0	1.0	1.0	1.0	1.0	1.0	1.0	1.0	1.0	1.0	1.0	1.0	1.0	1.0	1.0	1.0	1.0	1.0	1.0	1.0	1.0	1.0	1.0	1.0	1.0	1.0	1.0	1.0	1.0	1.0	1.0	1.0	1.0	1.0
HLA-DPA1_GAL	1.0	1.0	1.0	1.0	1.0	1.0	1.0	1.0	1.0	1.0	1.0	1.0	1.0	1.0	1.0	1.0	1.0	1.0	1.0	1.0	1.0	1.0	1.0	1.0	1.0	1.0	1.0	1.0	1.0	1.0	1.0	1.0	1.0	1.0	1.0	1.0	1.0	1.0	1.0	1.0	1.0	1.0	1.0	1.0	1.0	1.0	1.0	1.0	1.0
GALR2_GAL	1.0	1.0	1.0	1.0	1.0	1.0	1.0	1.0	1.0	1.0	1.0	1.0	1.0	1.0	1.0	1.0	1.0	1.0	1.0	1.0	1.0	1.0	1.0	1.0	1.0	1.0	1.0	1.0	1.0	1.0	1.0	1.0	1.0	1.0	1.0	1.0	1.0	1.0	1.0	1.0	1.0	1.0	1.0	1.0	1.0	1.0	1.0	1.0	1.0
GALR3_GAL	1.0	1.0	1.0	1.0	1.0	1.0	1.0	1.0	1.0	1.0	1.0	1.0	1.0	1.0	1.0	1.0	1.0	1.0	1.0	1.0	1.0	1.0	1.0	1.0	1.0	1.0	1.0	1.0	1.0	1.0	1.0	1.0	1.0	1.0	1.0	1.0	1.0	1.0	1.0	1.0	1.0	1.0	1.0	1.0	1.0	1.0	1.0	1.0	1.0
PVR_CD96	1.0	1.0	1.0	1.0	1.0	1.0	1.0	1.0	1.0	1.0	1.0	1.0	1.0	1.0	1.0	1.0	1.0	1.0	1.0	1.0	1.0	1.0	1.0	1.0	1.0	1.0	1.0	1.0	1.0	1.0	1.0	1.0	1.0	1.0	1.0	1.0	1.0	1.0	1.0	1.0	1.0	1.0	1.0	1.0	1.0	1.0	1.0	1.0	1.0
PVR_CD226	1.0	1.0	1.0	1.0	1.0	1.0	1.0	1.0	1.0	1.0	1.0	1.0	1.0	1.0	1.0	1.0	1.0	1.0	1.0	1.0	1.0	1.0	1.0	1.0	1.0	1.0	1.0	1.0	1.0	1.0	1.0	1.0	1.0	1.0	1.0	1.0	1.0	1.0	1.0	1.0	1.0	1.0	1.0	1.0	1.0	1.0	1.0	1.0	1.0
PVR_TIGIT	1.0	1.0	1.0	1.0	1.0	1.0	1.0	1.0	1.0	1.0	1.0	1.0	1.0	1.0	1.0	1.0	1.0	1.0	1.0	1.0	1.0	1.0	1.0	1.0	1.0	1.0	1.0	1.0	1.0	1.0	1.0	1.0	1.0	1.0	1.0	1.0	1.0	1.0	1.0	1.0	1.0	1.0	1.0	1.0	1.0	1.0	1.0	1.0	1.0
PVR_NECTIN3	1.0	1.0	1.0	1.0	1.0	1.0	1.0	1.0	1.0	1.0	1.0	1.0	1.0	1.0	1.0	1.0	1.0	1.0	1.0	1.0	1.0	1.0	1.0	1.0	1.0	1.0	1.0	1.0	1.0	1.0	1.0	1.0	1.0	1.0	1.0	1.0	1.0	1.0	1.0	1.0	1.0	1.0	1.0	1.0	1.0	1.0	1.0	1.0	1.0
CADM3_NECTIN3	1.0	1.0	1.0	1.0	1.0	1.0	1.0	1.0	1.0	1.0	1.0	1.0	1.0	1.0	1.0	1.0	1.0	1.0	1.0	1.0	1.0	1.0	1.0	1.0	1.0	1.0	1.0	1.0	1.0	1.0	1.0	1.0	1.0	1.0	1.0	1.0	1.0	1.0	1.0	1.0	1.0	1.0	1.0	1.0	1.0	1.0	1.0	1.0	1.0
CADM1_NECTIN3	1.0	1.0	1.0	1.0	1.0	1.0	1.0	1.0	1.0	1.0	1.0	1.0	1.0	1.0	1.0	1.0	1.0	1.0	1.0	1.0	1.0	1.0	1.0	1.0	1.0	1.0	1.0	1.0	1.0	1.0	1.0	1.0	1.0	1.0	1.0	1.0	1.0	1.0	1.0	1.0	1.0	1.0	1.0	1.0	1.0	1.0	1.0	1.0	1.0
NECTIN1_NECTIN3	1.0	1.0	1.0	1.0	1.0	1.0	1.0	1.0	1.0	1.0	1.0	1.0	1.0	1.0	1.0	1.0	1.0	1.0	1.0	1.0	1.0	1.0	1.0	1.0	1.0	1.0	1.0	1.0	1.0	1.0	1.0	1.0	1.0	1.0	1.0	1.0	1.0	1.0	1.0	1.0	1.0	1.0	1.0	1.0	1.0	1.0	1.0	1.0	1.0
TIGIT_NECTIN3	1.0	1.0	1.0	1.0	1.0	1.0	1.0	1.0	1.0	1.0	1.0	1.0	1.0	1.0	1.0	1.0	1.0	1.0	1.0	1.0	1.0	1.0	1.0	1.0	1.0	1.0	1.0	1.0	1.0	1.0	1.0	1.0	1.0	1.0	1.0	1.0	1.0	1.0	1.0	1.0	1.0	1.0	1.0	1.0	1.0	1.0	1.0	1.0	1.0
NECTIN2_NECTIN3	1.0	1.0	1.0	1.0	1.0	1.0	1.0	1.0	1.0	1.0	1.0	1.0	1.0	1.0	1.0	1.0	1.0	1.0	1.0	1.0	1.0	1.0	1.0	1.0	1.0	1.0	1.0	1.0	1.0	1.0	1.0	1.0	1.0	1.0	1.0	1.0	1.0	1.0	1.0	1.0	1.0	1.0	1.0	1.0	1.0	1.0	1.0	1.0	1.0
CADM3_CADM1	1.0	1.0	1.0	1.0	1.0	1.0	1.0	1.0	1.0	1.0	1.0	1.0	1.0	1.0	1.0	1.0	1.0	1.0	1.0	1.0	1.0	1.0	1.0	1.0	1.0	1.0	1.0	1.0	1.0	1.0	1.0	1.0	1.0	1.0	1.0	1.0	1.0	1.0	1.0	1.0	1.0	1.0	1.0	1.0	1.0	1.0	1.0	1.0	1.0
CADM1_CADM1	1.0	1.0	1.0	1.0	1.0	1.0	1.0	1.0	1.0	1.0	1.0	1.0	1.0	1.0	1.0	1.0	1.0	1.0	1.0	1.0	1.0	1.0	1.0	1.0	1.0	1.0	1.0	1.0	1.0	1.0	1.0	1.0	1.0	1.0	1.0	1.0	1.0	1.0	1.0	1.0	1.0	1.0	1.0	1.0	1.0	1.0	1.0	1.0	1.0
CRTAM_CADM1	1.0	1.0	1.0	1.0	1.0	1.0	1.0	1.0	1.0	1.0	1.0	1.0	1.0	1.0	1.0	1.0	1.0	1.0	1.0	1.0	1.0	1.0	1.0	1.0	1.0	1.0	1.0	1.0	1.0	1.0	1.0	1.0	1.0	1.0	1.0	1.0	1.0	1.0	1.0	1.0	1.0	1.0	1.0	1.0	1.0	1.0	1.0	1.0	1.0
CADM3_CADM4	1.0	1.0	1.0	1.0	1.0	1.0	1.0	1.0	1.0	1.0	1.0	1.0	1.0	1.0	1.0	1.0	1.0	1.0	1.0	1.0	1.0	1.0	1.0	1.0	1.0	1.0	1.0	1.0	1.0	1.0	1.0	1.0	1.0	1.0	1.0	1.0	1.0	1.0	1.0	1.0	1.0	1.0	1.0	1.0	1.0	1.0	1.0	1.0	1.0
CADM3_EPB41L1	1.0	1.0	1.0	1.0	1.0	1.0	1.0	1.0	1.0	1.0	1.0	1.0	1.0	1.0	1.0	1.0	1.0	1.0	1.0	1.0	1.0	1.0	1.0	1.0	1.0	1.0	1.0	1.0	1.0	1.0	1.0	1.0	1.0	1.0	1.0	1.0	1.0	1.0	1.0	1.0	1.0	1.0	1.0	1.0	1.0	1.0	1.0	1.0	1.0
NECTIN1_CADM3	1.0	1.0	1.0	1.0	1.0	1.0	1.0	1.0	1.0	1.0	1.0	1.0	1.0	1.0	1.0	1.0	1.0	1.0	1.0	1.0	1.0	1.0	1.0	1.0	1.0	1.0	1.0	1.0	1.0	1.0	1.0	1.0	1.0	1.0	1.0	1.0	1.0	1.0	1.0	1.0	1.0	1.0	1.0	1.0	1.0	1.0	1.0	1.0	1.0
TIGIT_NECTIN2	1.0	1.0	1.0	1.0	1.0	1.0	1.0	1.0	1.0	1.0	1.0	1.0	1.0	1.0	1.0	1.0	1.0	1.0	1.0	1.0	1.0	1.0	1.0	1.0	1.0	1.0	1.0	1.0	1.0	1.0	1.0	1.0	1.0	1.0	1.0	1.0	1.0	1.0	1.0	1.0	1.0	1.0	1.0	1.0	1.0	1.0	1.0	1.0	1.0
CD226_NECTIN2	1.0	1.0	1.0	1.0	1.0	1.0	1.0	1.0	1.0	1.0	1.0	1.0	1.0	1.0	1.0	1.0	1.0	1.0	1.0	1.0	1.0	1.0	1.0	1.0	1.0	1.0	1.0	1.0	1.0	1.0	1.0	1.0	1.0	1.0	1.0	1.0	1.0	1.0	1.0	1.0	1.0	1.0	1.0	1.0	1.0	1.0	1.0	1.0	1.0
CDH1_KLRG1	1.0	1.0	1.0	1.0	1.0	1.0	1.0	1.0	1.0	1.0	1.0	1.0	1.0	1.0	1.0	1.0	1.0	1.0	1.0	1.0	1.0	1.0	1.0	1.0	1.0	1.0	1.0	1.0	1.0	1.0	1.0	1.0	1.0	1.0	1.0	1.0	1.0	1.0	1.0	1.0	1.0	1.0	1.0	1.0	1.0	1.0	1.0	1.0	1.0
SPP1_CD44	1.0	1.0	1.0	1.0	1.0	1.0	1.0	1.0	1.0	1.0	1.0	1.0	1.0	1.0	1.0	1.0	1.0	1.0	1.0	1.0	1.0	1.0	1.0	1.0	1.0	1.0	1.0	1.0	1.0	1.0	1.0	1.0	1.0	1.0	1.0	1.0	1.0	1.0	1.0	1.0	1.0	1.0	1.0	1.0	1.0	1.0	1.0	1.0	1.0
LGALS9_CD44	1.0	1.0	1.0	1.0	1.0	1.0	1.0	1.0	1.0	1.0	1.0	1.0	1.0	1.0	1.0	1.0	1.0	1.0	1.0	1.0	1.0	1.0	1.0	1.0	1.0	1.0	1.0	1.0	1.0	1.0	1.0	1.0	1.0	1.0	1.0	1.0	1.0	1.0	1.0	1.0	1.0	1.0	0.676	1.0	0.231	1.0	1.0	1.0	0.159
HGF_CD44	1.0	1.0	1.0	1.0	1.0	1.0	1.0	1.0	1.0	1.0	1.0	1.0	1.0	1.0	1.0	1.0	1.0	1.0	1.0	1.0	1.0	1.0	1.0	1.0	1.0	1.0	1.0	1.0	1.0	1.0	1.0	1.0	1.0	1.0	1.0	1.0	1.0	1.0	1.0	1.0	1.0	1.0	1.0	1.0	1.0	1.0	1.0	1.0	1.0
CD44_FGFR2	1.0	1.0	1.0	1.0	1.0	1.0	1.0	1.0	1.0	1.0	1.0	1.0	1.0	1.0	1.0	1.0	1.0	1.0	1.0	1.0	1.0	1.0	1.0	1.0	1.0	1.0	1.0	1.0	1.0	1.0	1.0	1.0	1.0	1.0	1.0	1.0	1.0	1.0	1.0	1.0	1.0	1.0	1.0	1.0	1.0	1.0	1.0	1.0	1.0
FGF7_FGFR2	1.0	1.0	1.0	1.0	1.0	1.0	1.0	1.0	1.0	1.0	1.0	1.0	1.0	1.0	1.0	1.0	1.0	1.0	1.0	1.0	1.0	1.0	1.0	1.0	1.0	1.0	1.0	1.0	1.0	1.0	1.0	1.0	1.0	1.0	1.0	1.0	1.0	1.0	1.0	1.0	1.0	1.0	1.0	1.0	1.0	1.0	1.0	1.0	1.0
TIMP1_FGFR2	1.0	1.0	1.0	1.0	1.0	1.0	1.0	1.0	1.0	1.0	1.0	1.0	1.0	1.0	1.0	1.0	1.0	1.0	1.0	1.0	1.0	1.0	1.0	1.0	1.0	1.0	1.0	1.0	1.0	1.0	1.0	1.0	1.0	1.0	1.0	1.0	1.0	1.0	1.0	1.0	1.0	1.0	1.0	1.0	1.0	1.0	1.0	1.0	1.0
FGFR1_FGFR2	1.0	1.0	1.0	1.0	1.0	1.0	1.0	1.0	1.0	1.0	1.0	1.0	1.0	1.0	1.0	1.0	1.0	1.0	1.0	1.0	1.0	1.0	1.0	1.0	1.0	1.0	1.0	1.0	1.0	1.0	1.0	1.0	1.0	1.0	1.0	1.0	1.0	1.0	1.0	1.0	1.0	1.0	1.0	1.0	1.0	1.0	1.0	1.0	1.0
FGF7_FGFR3	1.0	1.0	1.0	1.0	1.0	1.0	1.0	1.0	1.0	1.0	1.0	1.0	1.0	1.0	1.0	1.0	1.0	1.0	1.0	1.0	1.0	1.0	1.0	1.0	1.0	1.0	1.0	1.0	1.0	1.0	1.0	1.0	1.0	1.0	1.0	1.0	1.0	1.0	1.0	1.0	1.0	1.0	1.0	1.0	1.0	1.0	1.0	1.0	1.0
FGFR2_FGFR3	1.0	1.0	1.0	1.0	1.0	1.0	1.0	1.0	1.0	1.0	1.0	1.0	1.0	1.0	1.0	1.0	1.0	1.0	1.0	1.0	1.0	1.0	1.0	1.0	1.0	1.0	1.0	1.0	1.0	1.0	1.0	1.0	1.0	1.0	1.0	1.0	1.0	1.0	1.0	1.0	1.0	1.0	1.0	1.0	1.0	1.0	1.0	1.0	1.0
SPP1_PTGER4	1.0	1.0	1.0	1.0	1.0	1.0	1.0	1.0	1.0	1.0	1.0	1.0	1.0	1.0	1.0	1.0	1.0	1.0	1.0	1.0	1.0	1.0	1.0	1.0	1.0	1.0	1.0	1.0	1.0	1.0	1.0	1.0	1.0	1.0	1.0	1.0	1.0	1.0	1.0	1.0	1.0	1.0	1.0	1.0	1.0	1.0	1.0	1.0	1.0
TGFB1_TGFBR3	1.0	1.0	1.0	1.0	1.0	1.0	1.0	1.0	1.0	1.0	1.0	1.0	1.0	1.0	1.0	1.0	1.0	1.0	1.0	1.0	1.0	1.0	1.0	1.0	1.0	1.0	1.0	1.0	1.0	1.0	1.0	1.0	1.0	1.0	1.0	1.0	1.0	1.0	1.0	1.0	1.0	1.0	1.0	1.0	1.0	1.0	1.0	1.0	1.0
TGFB3_TGFBR3	1.0	1.0	1.0	1.0	1.0	1.0	1.0	1.0	1.0	1.0	1.0	1.0	1.0	1.0	1.0	1.0	1.0	1.0	1.0	1.0	1.0	1.0	1.0	1.0	1.0	1.0	1.0	1.0	1.0	1.0	1.0	1.0	1.0	1.0	1.0	1.0	1.0	1.0	1.0	1.0	1.0	1.0	1.0	1.0	1.0	1.0	1.0	1.0	1.0
JAM2_JAM3	1.0	1.0	1.0	1.0	1.0	1.0	1.0	1.0	1.0	1.0	1.0	1.0	1.0	1.0	1.0	1.0	1.0	1.0	1.0	1.0	1.0	1.0	1.0	1.0	1.0	1.0	1.0	1.0	1.0	1.0	1.0	1.0	1.0	1.0	1.0	1.0	1.0	1.0	1.0	1.0	1.0	1.0	1.0	1.0	1.0	1.0	1.0	1.0	1.0
JAM3_JAM3	1.0	1.0	1.0	1.0	1.0	1.0	1.0	1.0	1.0	1.0	1.0	1.0	1.0	1.0	1.0	1.0	1.0	1.0	1.0	1.0	1.0	1.0	1.0	1.0	1.0	1.0	1.0	1.0	1.0	1.0	1.0	1.0	1.0	1.0	1.0	1.0	1.0	1.0	1.0	1.0	1.0	1.0	1.0	1.0	1.0	1.0	1.0	1.0	1.0
FFAR2_FAM3C	1.0	1.0	1.0	1.0	1.0	1.0	1.0	1.0	1.0	1.0	1.0	1.0	1.0	1.0	1.0	1.0	1.0	1.0	1.0	1.0	1.0	1.0	1.0	1.0	1.0	1.0	1.0	1.0	1.0	1.0	1.0	1.0	1.0	1.0	1.0	1.0	1.0	1.0	1.0	1.0	1.0	1.0	1.0	1.0	1.0	1.0	1.0	1.0	1.0
HLA-C_FAM3C	1.0	1.0	1.0	1.0	1.0	1.0	1.0	1.0	1.0	1.0	1.0	1.0	1.0	1.0	1.0	1.0	1.0	1.0	1.0	1.0	1.0	1.0	1.0	1.0	1.0	1.0	1.0	1.0	1.0	1.0	1.0	1.0	1.0	1.0	1.0	1.0	1.0	1.0	1.0	1.0	1.0	1.0	1.0	1.0	1.0	1.0	1.0	1.0	1.0
LAMP1_FAM3C	1.0	1.0	1.0	1.0	1.0	1.0	1.0	1.0	1.0	1.0	1.0	1.0	1.0	1.0	1.0	1.0	1.0	1.0	1.0	1.0	1.0	1.0	1.0	1.0	1.0	1.0	1.0	1.0	1.0	1.0	1.0	1.0	1.0	1.0	1.0	1.0	1.0	1.0	1.0	1.0	1.0	1.0	1.0	1.0	1.0	1.0	1.0	1.0	1.0
KIR2DL3_FAM3C	1.0	1.0	1.0	1.0	1.0	1.0	1.0	1.0	1.0	1.0	1.0	1.0	1.0	1.0	1.0	1.0	1.0	1.0	1.0	1.0	1.0	1.0	1.0	1.0	1.0	1.0	1.0	1.0	1.0	1.0	1.0	1.0	1.0	1.0	1.0	1.0	1.0	1.0	1.0	1.0	1.0	1.0	1.0	1.0	1.0	1.0	1.0	1.0	1.0
CXADR_FAM3C	1.0	1.0	1.0	1.0	1.0	1.0	1.0	1.0	1.0	1.0	1.0	1.0	1.0	1.0	1.0	1.0	1.0	1.0	1.0	1.0	1.0	1.0	1.0	1.0	1.0	1.0	1.0	1.0	1.0	1.0	1.0	1.0	1.0	1.0	1.0	1.0	1.0	1.0	1.0	1.0	1.0	1.0	1.0	1.0	1.0	1.0	1.0	1.0	1.0
ADGRG5_FAM3C	1.0	1.0	1.0	1.0	1.0	1.0	1.0	1.0	1.0	1.0	1.0	1.0	1.0	1.0	1.0	1.0	1.0	1.0	1.0	1.0	1.0	1.0	1.0	1.0	1.0	1.0	1.0	1.0	1.0	1.0	1.0	1.0	1.0	1.0	1.0	1.0	1.0	1.0	1.0	1.0	1.0	1.0	1.0	1.0	1.0	1.0	1.0	1.0	1.0
FFAR2_CCL4L2	1.0	1.0	1.0	1.0	1.0	1.0	1.0	1.0	1.0	1.0	1.0	1.0	1.0	1.0	1.0	1.0	1.0	1.0	1.0	1.0	1.0	1.0	1.0	1.0	1.0	1.0	1.0	1.0	1.0	1.0	1.0	1.0	1.0	1.0	1.0	1.0	1.0	1.0	1.0	1.0	1.0	1.0	1.0	1.0	1.0	1.0	1.0	1.0	1.0
PGRMC2_CCL4L2	1.0	1.0	1.0	1.0	1.0	1.0	1.0	1.0	1.0	1.0	1.0	1.0	1.0	1.0	1.0	1.0	1.0	1.0	1.0	1.0	1.0	1.0	1.0	1.0	1.0	1.0	1.0	1.0	1.0	1.0	1.0	1.0	1.0	1.0	1.0	1.0	1.0	1.0	1.0	1.0	1.0	1.0	1.0	1.0	1.0	1.0	1.0	1.0	1.0
FFAR2_TNF	1.0	1.0	1.0	1.0	1.0	1.0	1.0	1.0	1.0	1.0	1.0	1.0	1.0	1.0	1.0	1.0	1.0	1.0	1.0	1.0	1.0	1.0	1.0	1.0	1.0	1.0	1.0	1.0	1.0	1.0	1.0	1.0	1.0	1.0	1.0	1.0	1.0	1.0	1.0	1.0	1.0	1.0	1.0	1.0	1.0	1.0	1.0	1.0	1.0
HLA-C_KIR2DL3	1.0	1.0	1.0	1.0	1.0	1.0	1.0	1.0	1.0	1.0	1.0	1.0	1.0	1.0	1.0	1.0	1.0	1.0	1.0	1.0	1.0	1.0	1.0	1.0	1.0	1.0	1.0	1.0	1.0	1.0	1.0	1.0	1.0	1.0	1.0	1.0	1.0	1.0	1.0	1.0	1.0	1.0	1.0	1.0	1.0	1.0	1.0	1.0	1.0
HLA-C_KIR2DL1	1.0	1.0	1.0	1.0	1.0	1.0	1.0	1.0	1.0	1.0	1.0	1.0	1.0	1.0	1.0	1.0	1.0	1.0	1.0	1.0	1.0	1.0	1.0	1.0	1.0	1.0	1.0	1.0	1.0	1.0	1.0	1.0	1.0	1.0	1.0	1.0	1.0	1.0	1.0	1.0	1.0	1.0	1.0	1.0	1.0	1.0	1.0	1.0	1.0
ASGR2_ADIPOQ	1.0	1.0	1.0	1.0	1.0	1.0	1.0	1.0	1.0	1.0	1.0	1.0	1.0	1.0	1.0	1.0	1.0	1.0	1.0	1.0	1.0	1.0	1.0	1.0	1.0	1.0	1.0	1.0	1.0	1.0	1.0	1.0	1.0	1.0	1.0	1.0	1.0	1.0	1.0	1.0	1.0	1.0	1.0	1.0	1.0	1.0	1.0	1.0	1.0
LAMP1_VSTM1	1.0	1.0	1.0	1.0	1.0	1.0	1.0	1.0	1.0	1.0	1.0	1.0	1.0	1.0	1.0	1.0	1.0	1.0	1.0	1.0	1.0	1.0	1.0	1.0	1.0	1.0	1.0	1.0	1.0	1.0	1.0	1.0	1.0	1.0	1.0	1.0	1.0	1.0	1.0	1.0	1.0	1.0	1.0	1.0	1.0	1.0	1.0	1.0	1.0
KIR2DL3_CXCL9	1.0	1.0	1.0	1.0	1.0	1.0	1.0	1.0	1.0	1.0	1.0	1.0	1.0	1.0	1.0	1.0	1.0	1.0	1.0	1.0	1.0	1.0	1.0	1.0	1.0	1.0	1.0	1.0	1.0	1.0	1.0	1.0	1.0	1.0	1.0	1.0	1.0	1.0	1.0	1.0	1.0	1.0	1.0	1.0	1.0	1.0	1.0	1.0	1.0
CXCR3_CXCL9	1.0	1.0	1.0	1.0	1.0	1.0	1.0	1.0	1.0	1.0	1.0	1.0	1.0	1.0	1.0	1.0	1.0	1.0	1.0	1.0	1.0	1.0	1.0	1.0	1.0	1.0	1.0	1.0	1.0	1.0	1.0	1.0	1.0	1.0	1.0	1.0	1.0	1.0	1.0	1.0	1.0	1.0	1.0	1.0	1.0	1.0	1.0	1.0	1.0
DPP4_CXCL9	1.0	1.0	1.0	1.0	1.0	1.0	1.0	1.0	1.0	1.0	1.0	1.0	1.0	1.0	1.0	1.0	1.0	1.0	1.0	1.0	1.0	1.0	1.0	1.0	1.0	1.0	1.0	1.0	1.0	1.0	1.0	1.0	1.0	1.0	1.0	1.0	1.0	1.0	1.0	1.0	1.0	1.0	1.0	1.0	1.0	1.0	1.0	1.0	1.0
FCGR2A_CXCL9	1.0	1.0	1.0	1.0	1.0	1.0	1.0	1.0	1.0	1.0	1.0	1.0	1.0	1.0	1.0	1.0	1.0	1.0	1.0	1.0	1.0	1.0	1.0	1.0	1.0	1.0	1.0	1.0	1.0	1.0	1.0	1.0	1.0	1.0	1.0	1.0	1.0	1.0	1.0	1.0	1.0	1.0	1.0	1.0	1.0	1.0	1.0	1.0	1.0
EGFR_NRG1	1.0	1.0	1.0	1.0	1.0	1.0	1.0	1.0	1.0	1.0	1.0	1.0	1.0	1.0	1.0	1.0	1.0	1.0	1.0	1.0	1.0	1.0	1.0	1.0	1.0	1.0	1.0	1.0	1.0	1.0	1.0	1.0	1.0	1.0	1.0	1.0	1.0	1.0	1.0	1.0	1.0	1.0	1.0	1.0	1.0	1.0	1.0	1.0	1.0
HLA-DPB1_NRG1	1.0	1.0	1.0	1.0	1.0	1.0	1.0	1.0	1.0	1.0	1.0	1.0	1.0	1.0	1.0	1.0	1.0	1.0	1.0	1.0	1.0	1.0	1.0	1.0	1.0	1.0	1.0	1.0	1.0	1.0	1.0	1.0	1.0	1.0	1.0	1.0	1.0	1.0	1.0	1.0	1.0	1.0	1.0	1.0	1.0	1.0	1.0	1.0	1.0
ADGRL1_NRG1	1.0	1.0	1.0	1.0	1.0	1.0	1.0	1.0	1.0	1.0	1.0	1.0	1.0	1.0	1.0	1.0	1.0	1.0	1.0	1.0	1.0	1.0	1.0	1.0	1.0	1.0	1.0	1.0	1.0	1.0	1.0	1.0	1.0	1.0	1.0	1.0	1.0	1.0	1.0	1.0	1.0	1.0	1.0	1.0	1.0	1.0	1.0	1.0	1.0
EGFR_TGFA	1.0	1.0	1.0	1.0	1.0	1.0	1.0	1.0	1.0	1.0	1.0	1.0	1.0	1.0	1.0	1.0	1.0	1.0	1.0	1.0	1.0	1.0	1.0	1.0	1.0	1.0	1.0	1.0	1.0	1.0	1.0	1.0	1.0	1.0	1.0	1.0	1.0	1.0	1.0	1.0	1.0	1.0	1.0	1.0	1.0	1.0	1.0	1.0	1.0
EGFR_TGFB1	1.0	1.0	1.0	1.0	1.0	1.0	1.0	1.0	1.0	1.0	1.0	1.0	1.0	1.0	1.0	1.0	1.0	1.0	1.0	1.0	1.0	1.0	1.0	1.0	1.0	1.0	1.0	1.0	1.0	1.0	1.0	1.0	1.0	1.0	1.0	1.0	1.0	1.0	1.0	1.0	1.0	1.0	1.0	1.0	1.0	1.0	1.0	1.0	1.0
EGFR_MIF	1.0	1.0	1.0	1.0	1.0	1.0	1.0	1.0	1.0	1.0	1.0	1.0	1.0	1.0	1.0	1.0	1.0	1.0	1.0	1.0	1.0	1.0	1.0	1.0	1.0	1.0	1.0	1.0	1.0	1.0	1.0	1.0	1.0	1.0	1.0	1.0	1.0	1.0	1.0	1.0	1.0	1.0	1.0	1.0	1.0	1.0	1.0	1.0	1.0
CD74_MIF	1.0	1.0	0.0	0.0	1.0	1.0	1.0	0.0	1.0	1.0	0.0	0.0	1.0	1.0	1.0	1.0	1.0	1.0	1.0	0.0	1.0	1.0	1.0	0.0	1.0	1.0	0.0	0.0	1.0	1.0	1.0	0.0	0.0	1.0	1.0	1.0	1.0	1.0	1.0	1.0	1.0	0.0	1.0	1.0	0.0	0.0	1.0	1.0	1.0
EGFR_AREG	1.0	1.0	1.0	1.0	1.0	1.0	1.0	1.0	1.0	1.0	1.0	1.0	1.0	1.0	1.0	1.0	1.0	1.0	1.0	1.0	1.0	1.0	1.0	1.0	1.0	1.0	1.0	1.0	1.0	1.0	1.0	1.0	1.0	1.0	1.0	1.0	1.0	1.0	1.0	1.0	1.0	1.0	1.0	1.0	1.0	1.0	1.0	1.0	1.0
ICAM1_AREG	1.0	1.0	1.0	1.0	1.0	1.0	1.0	1.0	1.0	1.0	1.0	1.0	1.0	1.0	1.0	1.0	1.0	1.0	1.0	1.0	1.0	1.0	1.0	1.0	1.0	1.0	1.0	1.0	1.0	1.0	1.0	1.0	1.0	1.0	1.0	1.0	1.0	1.0	1.0	1.0	1.0	1.0	1.0	1.0	1.0	1.0	1.0	1.0	1.0
EGFR_GRN	1.0	1.0	1.0	1.0	1.0	1.0	1.0	1.0	1.0	1.0	1.0	1.0	1.0	1.0	1.0	1.0	1.0	1.0	1.0	1.0	1.0	1.0	1.0	1.0	1.0	1.0	1.0	1.0	1.0	1.0	1.0	1.0	1.0	1.0	1.0	1.0	1.0	1.0	1.0	1.0	1.0	1.0	1.0	1.0	1.0	1.0	1.0	1.0	1.0
TNFRSF1A_GRN	1.0	1.0	1.0	1.0	1.0	1.0	1.0	1.0	1.0	1.0	1.0	1.0	1.0	1.0	1.0	1.0	1.0	1.0	1.0	1.0	1.0	1.0	1.0	1.0	1.0	1.0	1.0	1.0	1.0	1.0	1.0	1.0	1.0	1.0	1.0	1.0	1.0	1.0	1.0	1.0	1.0	1.0	1.0	1.0	1.0	1.0	1.0	1.0	1.0
NTRK1_GRN	1.0	1.0	1.0	1.0	1.0	1.0	1.0	1.0	1.0	1.0	1.0	1.0	1.0	1.0	1.0	1.0	1.0	1.0	1.0	1.0	1.0	1.0	1.0	1.0	1.0	1.0	1.0	1.0	1.0	1.0	1.0	1.0	1.0	1.0	1.0	1.0	1.0	1.0	1.0	1.0	1.0	1.0	1.0	1.0	1.0	1.0	1.0	1.0	1.0
TNFRSF1B_GRN	1.0	1.0	1.0	1.0	1.0	1.0	1.0	1.0	1.0	1.0	1.0	1.0	1.0	1.0	1.0	1.0	1.0	1.0	1.0	1.0	1.0	1.0	1.0	1.0	1.0	1.0	1.0	1.0	1.0	1.0	1.0	1.0	1.0	1.0	1.0	1.0	1.0	1.0	1.0	1.0	1.0	1.0	1.0	1.0	1.0	1.0	1.0	1.0	1.0
EGFR_COPA	1.0	1.0	1.0	1.0	1.0	1.0	1.0	1.0	1.0	1.0	1.0	1.0	1.0	1.0	1.0	1.0	1.0	1.0	1.0	1.0	1.0	1.0	1.0	1.0	1.0	1.0	1.0	1.0	1.0	1.0	1.0	1.0	1.0	1.0	1.0	1.0	1.0	1.0	1.0	1.0	1.0	1.0	1.0	1.0	1.0	1.0	1.0	1.0	1.0
CD74_COPA	0.0	0.0	1.0	1.0	1.0	1.0	1.0	0.0	0.0	1.0	1.0	0.0	1.0	1.0	1.0	0.0	0.0	0.0	0.0	0.0	0.0	0.0	1.0	1.0	0.0	1.0	0.0	1.0	0.0	0.0	1.0	1.0	0.0	1.0	1.0	0.0	0.0	0.0	0.0	0.0	0.0	0.0	0.0	0.0	1.0	1.0	1.0	1.0	1.0
NTRK1_COPA	1.0	1.0	1.0	1.0	1.0	1.0	1.0	1.0	1.0	1.0	1.0	1.0	1.0	1.0	1.0	1.0	1.0	1.0	1.0	1.0	1.0	1.0	1.0	1.0	1.0	1.0	1.0	1.0	1.0	1.0	1.0	1.0	1.0	1.0	1.0	1.0	1.0	1.0	1.0	1.0	1.0	1.0	1.0	1.0	1.0	1.0	1.0	1.0	1.0
EGFR_EPGN	1.0	1.0	1.0	1.0	1.0	1.0	1.0	1.0	1.0	1.0	1.0	1.0	1.0	1.0	1.0	1.0	1.0	1.0	1.0	1.0	1.0	1.0	1.0	1.0	1.0	1.0	1.0	1.0	1.0	1.0	1.0	1.0	1.0	1.0	1.0	1.0	1.0	1.0	1.0	1.0	1.0	1.0	1.0	1.0	1.0	1.0	1.0	1.0	1.0
EGFR_HBEGF	1.0	1.0	1.0	1.0	1.0	1.0	1.0	1.0	1.0	1.0	1.0	1.0	1.0	1.0	1.0	1.0	1.0	1.0	1.0	1.0	1.0	1.0	1.0	1.0	1.0	1.0	1.0	1.0	1.0	1.0	1.0	1.0	1.0	1.0	1.0	1.0	1.0	1.0	1.0	1.0	1.0	1.0	1.0	1.0	1.0	1.0	1.0	1.0	1.0
CD44_HBEGF	1.0	1.0	1.0	1.0	1.0	1.0	1.0	1.0	1.0	1.0	1.0	1.0	1.0	1.0	1.0	1.0	1.0	1.0	1.0	1.0	1.0	1.0	1.0	1.0	1.0	1.0	1.0	1.0	1.0	1.0	1.0	1.0	1.0	1.0	1.0	0.275	0.322	1.0	1.0	1.0	0.088	1.0	1.0	1.0	1.0	1.0	1.0	1.0	1.0
HLA-DPB1_TNFSF13B	0.0	1.0	1.0	1.0	1.0	1.0	0.0	0.0	0.0	0.0	0.0	1.0	1.0	1.0	1.0	1.0	1.0	1.0	0.0	0.0	0.0	1.0	1.0	1.0	0.0	1.0	1.0	1.0	0.0	1.0	1.0	0.0	1.0	1.0	1.0	0.0	0.0	0.0	1.0	1.0	0.0	1.0	0.0	1.0	1.0	1.0	1.0	1.0	0.0
TNFRSF13B_TNFSF13B	1.0	1.0	1.0	1.0	1.0	1.0	1.0	1.0	1.0	1.0	1.0	1.0	1.0	1.0	1.0	1.0	1.0	1.0	1.0	1.0	1.0	1.0	1.0	1.0	1.0	1.0	1.0	1.0	1.0	1.0	1.0	1.0	1.0	1.0	1.0	1.0	1.0	1.0	1.0	1.0	1.0	1.0	1.0	1.0	1.0	1.0	1.0	1.0	1.0
TFRC_TNFSF13B	1.0	1.0	1.0	1.0	1.0	1.0	1.0	1.0	1.0	1.0	1.0	1.0	1.0	1.0	1.0	1.0	1.0	1.0	1.0	1.0	1.0	1.0	1.0	1.0	1.0	1.0	1.0	1.0	1.0	1.0	1.0	1.0	1.0	1.0	1.0	1.0	1.0	1.0	1.0	1.0	1.0	1.0	1.0	1.0	1.0	1.0	1.0	1.0	1.0
CD40_TNFSF13B	1.0	1.0	1.0	1.0	1.0	1.0	1.0	1.0	1.0	1.0	1.0	1.0	1.0	1.0	1.0	1.0	1.0	1.0	1.0	1.0	1.0	1.0	1.0	1.0	1.0	1.0	1.0	1.0	1.0	1.0	1.0	1.0	1.0	1.0	1.0	1.0	1.0	1.0	1.0	1.0	1.0	1.0	1.0	1.0	1.0	1.0	1.0	1.0	1.0
TNFRSF17_TNFSF13B	1.0	1.0	1.0	1.0	1.0	1.0	1.0	1.0	1.0	1.0	1.0	1.0	1.0	1.0	1.0	1.0	1.0	1.0	1.0	1.0	1.0	1.0	1.0	1.0	1.0	1.0	1.0	1.0	1.0	1.0	1.0	1.0	1.0	1.0	1.0	1.0	1.0	1.0	1.0	1.0	1.0	1.0	1.0	1.0	1.0	1.0	1.0	1.0	1.0
TNFRSF13C_TNFSF13B	1.0	1.0	1.0	1.0	1.0	1.0	1.0	1.0	1.0	1.0	1.0	1.0	1.0	1.0	1.0	1.0	1.0	1.0	1.0	1.0	1.0	1.0	1.0	1.0	1.0	1.0	1.0	1.0	1.0	1.0	1.0	1.0	1.0	1.0	1.0	1.0	1.0	1.0	1.0	1.0	1.0	1.0	1.0	1.0	1.0	1.0	1.0	1.0	1.0
CD74_APP	0.0	1.0	1.0	0.0	1.0	0.0	0.0	1.0	0.0	0.0	1.0	1.0	1.0	1.0	1.0	1.0	0.0	1.0	0.0	1.0	0.0	0.0	1.0	1.0	0.0	1.0	1.0	1.0	1.0	0.0	1.0	1.0	1.0	1.0	1.0	0.0	1.0	0.0	0.0	0.0	1.0	1.0	0.0	1.0	1.0	0.0	1.0	0.0	0.0
ICAM1_SPN	1.0	1.0	1.0	1.0	1.0	1.0	1.0	1.0	1.0	1.0	1.0	1.0	1.0	1.0	1.0	1.0	1.0	1.0	1.0	1.0	1.0	1.0	1.0	1.0	1.0	1.0	1.0	1.0	1.0	1.0	1.0	1.0	1.0	1.0	1.0	1.0	1.0	1.0	1.0	1.0	1.0	1.0	1.0	1.0	1.0	1.0	1.0	1.0	1.0
ICAM1_ITGAL	1.0	1.0	1.0	1.0	1.0	1.0	1.0	1.0	1.0	1.0	1.0	1.0	1.0	1.0	1.0	1.0	1.0	1.0	1.0	1.0	1.0	1.0	1.0	1.0	1.0	1.0	1.0	1.0	1.0	1.0	1.0	1.0	1.0	1.0	1.0	1.0	1.0	1.0	1.0	1.0	1.0	1.0	1.0	1.0	1.0	1.0	1.0	1.0	1.0
TNFRSF1A_FASLG	1.0	1.0	1.0	1.0	1.0	1.0	1.0	1.0	1.0	1.0	1.0	1.0	1.0	1.0	1.0	1.0	1.0	1.0	1.0	1.0	1.0	1.0	1.0	1.0	1.0	1.0	1.0	1.0	1.0	1.0	1.0	1.0	1.0	1.0	1.0	1.0	1.0	1.0	1.0	1.0	1.0	1.0	1.0	1.0	1.0	1.0	1.0	1.0	1.0
TNFRSF10B_FASLG	1.0	1.0	1.0	1.0	1.0	1.0	1.0	1.0	1.0	1.0	1.0	1.0	1.0	1.0	1.0	1.0	1.0	1.0	1.0	1.0	1.0	1.0	1.0	1.0	1.0	1.0	1.0	1.0	1.0	1.0	1.0	1.0	1.0	1.0	1.0	1.0	1.0	1.0	1.0	1.0	1.0	1.0	1.0	1.0	1.0	1.0	1.0	1.0	1.0
FAS_FASLG	1.0	1.0	1.0	1.0	1.0	1.0	1.0	1.0	1.0	1.0	1.0	1.0	1.0	1.0	1.0	1.0	1.0	1.0	1.0	1.0	1.0	1.0	1.0	1.0	1.0	1.0	1.0	1.0	1.0	1.0	1.0	1.0	1.0	1.0	1.0	1.0	1.0	1.0	1.0	1.0	1.0	1.0	1.0	1.0	1.0	1.0	1.0	1.0	1.0
NTRK1_GPI	1.0	1.0	1.0	1.0	1.0	1.0	1.0	1.0	1.0	1.0	1.0	1.0	1.0	1.0	1.0	1.0	1.0	1.0	1.0	1.0	1.0	1.0	1.0	1.0	1.0	1.0	1.0	1.0	1.0	1.0	1.0	1.0	1.0	1.0	1.0	1.0	1.0	1.0	1.0	1.0	1.0	1.0	1.0	1.0	1.0	1.0	1.0	1.0	1.0
NTRK1_NAMPT	1.0	1.0	1.0	1.0	1.0	1.0	1.0	1.0	1.0	1.0	1.0	1.0	1.0	1.0	1.0	1.0	1.0	1.0	1.0	1.0	1.0	1.0	1.0	1.0	1.0	1.0	1.0	1.0	1.0	1.0	1.0	1.0	1.0	1.0	1.0	1.0	1.0	1.0	1.0	1.0	1.0	1.0	1.0	1.0	1.0	1.0	1.0	1.0	1.0
NTRK1_AIMP1	1.0	1.0	1.0	1.0	1.0	1.0	1.0	1.0	1.0	1.0	1.0	1.0	1.0	1.0	1.0	1.0	1.0	1.0	1.0	1.0	1.0	1.0	1.0	1.0	1.0	1.0	1.0	1.0	1.0	1.0	1.0	1.0	1.0	1.0	1.0	1.0	1.0	1.0	1.0	1.0	1.0	1.0	1.0	1.0	1.0	1.0	1.0	1.0	1.0
NRP1_VEGFA	1.0	1.0	1.0	1.0	1.0	1.0	1.0	1.0	1.0	1.0	1.0	1.0	1.0	1.0	1.0	1.0	1.0	1.0	1.0	1.0	1.0	1.0	1.0	1.0	1.0	1.0	1.0	1.0	1.0	1.0	1.0	1.0	1.0	1.0	1.0	1.0	1.0	1.0	1.0	1.0	1.0	1.0	1.0	1.0	1.0	1.0	1.0	1.0	1.0
NRP2_VEGFA	1.0	1.0	1.0	1.0	1.0	1.0	1.0	1.0	1.0	1.0	1.0	1.0	1.0	1.0	1.0	1.0	1.0	1.0	1.0	1.0	1.0	1.0	1.0	1.0	1.0	1.0	1.0	1.0	1.0	1.0	1.0	1.0	1.0	1.0	1.0	1.0	1.0	1.0	1.0	1.0	1.0	1.0	1.0	1.0	1.0	1.0	1.0	1.0	1.0
NRP1_PGF	1.0	1.0	1.0	0.0	1.0	0.0	0.0	1.0	0.0	1.0	1.0	1.0	1.0	1.0	1.0	1.0	0.0	1.0	1.0	1.0	1.0	1.0	1.0	0.004	1.0	1.0	1.0	1.0	1.0	0.0	1.0	1.0	1.0	1.0	1.0	1.0	1.0	1.0	0.0	1.0	1.0	1.0	1.0	1.0	1.0	1.0	1.0	1.0	1.0
NRP2_PGF	1.0	1.0	1.0	1.0	1.0	1.0	1.0	1.0	1.0	1.0	1.0	1.0	1.0	1.0	1.0	1.0	1.0	1.0	1.0	1.0	1.0	1.0	1.0	1.0	1.0	1.0	1.0	1.0	1.0	1.0	1.0	1.0	1.0	1.0	1.0	1.0	1.0	1.0	1.0	1.0	1.0	1.0	1.0	1.0	1.0	1.0	1.0	1.0	1.0
FLT1_PGF	1.0	1.0	1.0	1.0	1.0	1.0	1.0	1.0	1.0	1.0	1.0	1.0	1.0	1.0	1.0	1.0	1.0	1.0	1.0	1.0	1.0	1.0	1.0	1.0	1.0	1.0	1.0	1.0	1.0	1.0	1.0	1.0	1.0	1.0	1.0	1.0	1.0	1.0	1.0	1.0	1.0	1.0	1.0	1.0	1.0	1.0	1.0	1.0	1.0
NRP1_VEGFB	0.0	1.0	1.0	0.0	1.0	0.0	0.0	1.0	0.007	1.0	1.0	1.0	1.0	1.0	1.0	1.0	0.0	1.0	1.0	0.0	0.0	0.0	1.0	0.0	0.0	1.0	1.0	1.0	1.0	0.004	1.0	1.0	1.0	1.0	0.004	1.0	1.0	0.063	1.0	1.0	1.0	1.0	1.0	1.0	1.0	1.0	1.0	1.0	1.0
FLT1_VEGFB	1.0	1.0	1.0	1.0	1.0	1.0	1.0	1.0	1.0	1.0	1.0	1.0	1.0	1.0	1.0	1.0	1.0	1.0	1.0	1.0	1.0	1.0	1.0	1.0	1.0	1.0	1.0	1.0	1.0	1.0	1.0	1.0	1.0	1.0	1.0	1.0	1.0	1.0	1.0	1.0	1.0	1.0	1.0	1.0	1.0	1.0	1.0	1.0	1.0
ADRB2_VEGFB	1.0	1.0	1.0	1.0	1.0	1.0	1.0	1.0	1.0	1.0	1.0	1.0	1.0	1.0	1.0	1.0	1.0	1.0	1.0	1.0	1.0	1.0	1.0	1.0	1.0	1.0	1.0	1.0	1.0	1.0	1.0	1.0	1.0	1.0	1.0	1.0	1.0	1.0	1.0	1.0	1.0	1.0	1.0	1.0	1.0	1.0	1.0	1.0	1.0
NRP2_SEMA3F	1.0	1.0	1.0	1.0	1.0	1.0	1.0	1.0	1.0	1.0	1.0	1.0	1.0	1.0	1.0	1.0	1.0	1.0	1.0	1.0	1.0	1.0	1.0	1.0	1.0	1.0	1.0	1.0	1.0	1.0	1.0	1.0	1.0	1.0	1.0	1.0	1.0	1.0	1.0	1.0	1.0	1.0	1.0	1.0	1.0	1.0	1.0	1.0	1.0
NRP2_SEMA3C	1.0	1.0	1.0	1.0	1.0	1.0	1.0	1.0	1.0	1.0	1.0	1.0	1.0	1.0	1.0	1.0	1.0	1.0	1.0	1.0	1.0	1.0	1.0	1.0	1.0	1.0	1.0	1.0	1.0	1.0	1.0	1.0	1.0	1.0	1.0	1.0	1.0	1.0	1.0	1.0	1.0	1.0	1.0	1.0	1.0	1.0	1.0	1.0	1.0
HLA-A_KIR3DL1	1.0	1.0	1.0	1.0	1.0	1.0	1.0	1.0	1.0	1.0	1.0	1.0	1.0	1.0	1.0	1.0	1.0	1.0	1.0	1.0	1.0	1.0	1.0	1.0	1.0	1.0	1.0	1.0	1.0	1.0	1.0	1.0	1.0	1.0	1.0	1.0	1.0	1.0	1.0	1.0	1.0	1.0	1.0	1.0	1.0	1.0	1.0	1.0	1.0
HLA-F_KIR3DL1	1.0	1.0	1.0	1.0	1.0	1.0	1.0	1.0	1.0	1.0	1.0	1.0	1.0	1.0	1.0	1.0	1.0	1.0	1.0	1.0	1.0	1.0	1.0	1.0	1.0	1.0	1.0	1.0	1.0	1.0	1.0	1.0	1.0	1.0	1.0	1.0	1.0	1.0	1.0	1.0	1.0	1.0	1.0	1.0	1.0	1.0	1.0	1.0	1.0
CCL4L2_VSIR	1.0	1.0	1.0	1.0	1.0	1.0	1.0	1.0	1.0	1.0	1.0	1.0	1.0	1.0	1.0	1.0	1.0	1.0	1.0	1.0	1.0	1.0	1.0	1.0	1.0	1.0	1.0	1.0	1.0	1.0	1.0	1.0	1.0	1.0	1.0	1.0	1.0	1.0	1.0	1.0	1.0	1.0	1.0	1.0	1.0	1.0	1.0	1.0	1.0
TNF_VSIR	1.0	1.0	1.0	1.0	1.0	1.0	1.0	1.0	1.0	1.0	1.0	1.0	1.0	1.0	1.0	1.0	1.0	1.0	1.0	1.0	1.0	1.0	1.0	1.0	1.0	1.0	1.0	1.0	1.0	1.0	1.0	1.0	1.0	1.0	1.0	1.0	1.0	1.0	1.0	1.0	1.0	1.0	1.0	1.0	1.0	1.0	1.0	1.0	1.0
HLA-F_KIR3DL2	1.0	1.0	1.0	1.0	1.0	1.0	1.0	1.0	1.0	1.0	1.0	1.0	1.0	1.0	1.0	1.0	1.0	1.0	1.0	1.0	1.0	1.0	1.0	1.0	1.0	1.0	1.0	1.0	1.0	1.0	1.0	1.0	1.0	1.0	1.0	1.0	1.0	1.0	1.0	1.0	1.0	1.0	1.0	1.0	1.0	1.0	1.0	1.0	1.0
HLA-B_KIR3DL2	1.0	1.0	1.0	1.0	1.0	1.0	1.0	1.0	1.0	1.0	1.0	1.0	1.0	1.0	1.0	1.0	1.0	1.0	1.0	1.0	1.0	1.0	1.0	1.0	1.0	1.0	1.0	1.0	1.0	1.0	1.0	1.0	1.0	1.0	1.0	1.0	1.0	1.0	1.0	1.0	1.0	1.0	1.0	1.0	1.0	1.0	1.0	1.0	1.0
HLA-F_LILRB2	1.0	1.0	1.0	1.0	1.0	1.0	1.0	1.0	1.0	1.0	1.0	1.0	1.0	1.0	1.0	1.0	1.0	1.0	0.996	1.0	1.0	1.0	1.0	1.0	0.888	1.0	1.0	1.0	0.0	1.0	1.0	1.0	1.0	1.0	1.0	0.728	0.0	1.0	1.0	1.0	1.0	1.0	0.004	1.0	1.0	1.0	1.0	1.0	1.0
CD1D_LILRB2	1.0	1.0	1.0	1.0	1.0	1.0	1.0	1.0	1.0	1.0	1.0	1.0	1.0	1.0	1.0	1.0	1.0	1.0	1.0	1.0	1.0	1.0	1.0	1.0	1.0	1.0	1.0	1.0	1.0	1.0	1.0	1.0	1.0	1.0	1.0	1.0	1.0	1.0	1.0	1.0	1.0	1.0	1.0	1.0	1.0	1.0	1.0	1.0	1.0
HLA-G_LILRB2	1.0	1.0	1.0	1.0	1.0	1.0	1.0	1.0	1.0	1.0	1.0	1.0	1.0	1.0	1.0	1.0	1.0	1.0	1.0	1.0	1.0	1.0	1.0	1.0	1.0	1.0	1.0	1.0	1.0	1.0	1.0	1.0	1.0	1.0	1.0	1.0	1.0	1.0	1.0	1.0	1.0	1.0	1.0	1.0	1.0	1.0	1.0	1.0	1.0
HLA-F_LILRB1	1.0	1.0	1.0	1.0	1.0	1.0	1.0	1.0	1.0	1.0	1.0	1.0	1.0	1.0	1.0	1.0	1.0	1.0	1.0	1.0	1.0	1.0	1.0	1.0	1.0	1.0	1.0	1.0	1.0	1.0	1.0	1.0	1.0	1.0	1.0	1.0	1.0	1.0	1.0	1.0	1.0	1.0	1.0	1.0	1.0	1.0	1.0	1.0	1.0
HLA-G_LILRB1	1.0	1.0	1.0	1.0	1.0	1.0	1.0	1.0	1.0	1.0	1.0	1.0	1.0	1.0	1.0	1.0	1.0	1.0	1.0	1.0	1.0	1.0	1.0	1.0	1.0	1.0	1.0	1.0	1.0	1.0	1.0	1.0	1.0	1.0	1.0	1.0	1.0	1.0	1.0	1.0	1.0	1.0	1.0	1.0	1.0	1.0	1.0	1.0	1.0
CCL4_CCR5	1.0	1.0	1.0	1.0	1.0	1.0	1.0	1.0	1.0	1.0	1.0	1.0	1.0	1.0	1.0	1.0	1.0	1.0	1.0	1.0	1.0	1.0	1.0	1.0	1.0	1.0	1.0	1.0	1.0	1.0	1.0	1.0	1.0	1.0	1.0	1.0	1.0	1.0	1.0	1.0	1.0	1.0	1.0	1.0	1.0	1.0	1.0	1.0	1.0
CCL3_CCR5	1.0	1.0	1.0	1.0	1.0	1.0	1.0	1.0	1.0	1.0	1.0	1.0	1.0	1.0	1.0	1.0	1.0	1.0	1.0	1.0	1.0	1.0	1.0	1.0	1.0	1.0	1.0	1.0	1.0	1.0	1.0	1.0	1.0	1.0	1.0	1.0	1.0	1.0	1.0	1.0	1.0	1.0	1.0	1.0	1.0	1.0	1.0	1.0	1.0
CCL5_CCR5	1.0	1.0	1.0	1.0	1.0	1.0	1.0	1.0	1.0	1.0	1.0	1.0	1.0	1.0	1.0	1.0	1.0	1.0	1.0	1.0	1.0	1.0	1.0	1.0	1.0	1.0	1.0	1.0	1.0	1.0	1.0	1.0	1.0	1.0	1.0	1.0	1.0	1.0	1.0	1.0	1.0	1.0	1.0	1.0	1.0	1.0	1.0	1.0	1.0
CCL4_SLC7A1	1.0	1.0	1.0	1.0	1.0	1.0	1.0	1.0	1.0	1.0	1.0	1.0	1.0	1.0	1.0	1.0	1.0	1.0	1.0	1.0	1.0	1.0	1.0	1.0	1.0	1.0	1.0	1.0	1.0	1.0	1.0	1.0	1.0	1.0	1.0	1.0	1.0	1.0	1.0	1.0	1.0	1.0	1.0	1.0	1.0	1.0	1.0	1.0	1.0
CSF1_SLC7A1	1.0	1.0	1.0	1.0	1.0	1.0	1.0	1.0	1.0	1.0	1.0	1.0	1.0	1.0	1.0	1.0	1.0	1.0	1.0	1.0	1.0	1.0	1.0	1.0	1.0	1.0	1.0	1.0	1.0	1.0	1.0	1.0	1.0	1.0	1.0	1.0	1.0	1.0	1.0	1.0	1.0	1.0	1.0	1.0	1.0	1.0	1.0	1.0	1.0
IGF2_IDE	1.0	1.0	1.0	1.0	1.0	1.0	1.0	1.0	1.0	1.0	1.0	1.0	1.0	1.0	1.0	1.0	1.0	1.0	1.0	1.0	1.0	1.0	1.0	1.0	1.0	1.0	1.0	1.0	1.0	1.0	1.0	1.0	1.0	1.0	1.0	1.0	1.0	1.0	1.0	1.0	1.0	1.0	1.0	1.0	1.0	1.0	1.0	1.0	1.0
CCL3_IDE	1.0	1.0	1.0	1.0	1.0	1.0	1.0	1.0	1.0	1.0	1.0	1.0	1.0	1.0	1.0	1.0	1.0	1.0	1.0	1.0	1.0	1.0	1.0	1.0	1.0	1.0	1.0	1.0	1.0	1.0	1.0	1.0	1.0	1.0	1.0	1.0	1.0	1.0	1.0	1.0	1.0	1.0	1.0	1.0	1.0	1.0	1.0	1.0	1.0
IGF2_IGF1R	1.0	1.0	1.0	1.0	1.0	1.0	1.0	1.0	1.0	1.0	1.0	1.0	1.0	1.0	1.0	1.0	1.0	1.0	1.0	1.0	1.0	1.0	1.0	1.0	1.0	1.0	1.0	1.0	1.0	1.0	1.0	1.0	1.0	1.0	1.0	1.0	1.0	1.0	1.0	1.0	1.0	1.0	1.0	1.0	1.0	1.0	1.0	1.0	1.0
IGF1_IGF1R	1.0	1.0	1.0	1.0	1.0	1.0	1.0	1.0	1.0	1.0	1.0	1.0	1.0	1.0	1.0	1.0	1.0	1.0	1.0	1.0	1.0	1.0	1.0	1.0	1.0	1.0	1.0	1.0	1.0	1.0	1.0	1.0	1.0	1.0	1.0	1.0	1.0	1.0	1.0	1.0	1.0	1.0	1.0	1.0	1.0	1.0	1.0	1.0	1.0
IGF2_IGF2R	1.0	1.0	1.0	1.0	1.0	1.0	1.0	1.0	1.0	1.0	1.0	1.0	1.0	1.0	1.0	1.0	1.0	1.0	1.0	1.0	1.0	1.0	1.0	1.0	1.0	1.0	1.0	1.0	1.0	1.0	1.0	1.0	1.0	1.0	1.0	1.0	1.0	1.0	1.0	1.0	1.0	1.0	1.0	1.0	1.0	1.0	1.0	1.0	1.0
GRN_SORT1	1.0	1.0	1.0	1.0	1.0	1.0	1.0	1.0	1.0	0.0	1.0	1.0	1.0	1.0	1.0	1.0	1.0	1.0	1.0	1.0	1.0	1.0	1.0	1.0	1.0	1.0	1.0	1.0	1.0	1.0	1.0	1.0	1.0	1.0	1.0	1.0	1.0	1.0	1.0	1.0	1.0	1.0	1.0	1.0	1.0	1.0	1.0	1.0	1.0
COPA_SORT1	1.0	1.0	1.0	1.0	1.0	1.0	1.0	1.0	1.0	0.0	1.0	1.0	1.0	1.0	1.0	1.0	1.0	1.0	1.0	1.0	1.0	1.0	1.0	1.0	1.0	1.0	1.0	1.0	1.0	1.0	1.0	1.0	1.0	1.0	1.0	1.0	1.0	1.0	1.0	1.0	1.0	1.0	1.0	1.0	1.0	1.0	1.0	1.0	1.0
ADIPOQ_CD200R1	1.0	1.0	1.0	1.0	1.0	1.0	1.0	1.0	1.0	1.0	1.0	1.0	1.0	1.0	1.0	1.0	1.0	1.0	1.0	1.0	1.0	1.0	1.0	1.0	1.0	1.0	1.0	1.0	1.0	1.0	1.0	1.0	1.0	1.0	1.0	1.0	1.0	1.0	1.0	1.0	1.0	1.0	1.0	1.0	1.0	1.0	1.0	1.0	1.0
CD200_CD200R1	1.0	1.0	1.0	1.0	1.0	1.0	1.0	1.0	1.0	1.0	1.0	1.0	1.0	1.0	1.0	1.0	1.0	1.0	1.0	1.0	1.0	1.0	1.0	1.0	1.0	1.0	1.0	1.0	1.0	1.0	1.0	1.0	1.0	1.0	1.0	1.0	1.0	1.0	1.0	1.0	1.0	1.0	1.0	1.0	1.0	1.0	1.0	1.0	1.0
ADIPOQ_CLEC2D	1.0	1.0	1.0	1.0	1.0	1.0	1.0	1.0	1.0	1.0	1.0	1.0	1.0	1.0	1.0	1.0	1.0	1.0	1.0	1.0	1.0	1.0	1.0	1.0	1.0	1.0	1.0	1.0	1.0	1.0	1.0	1.0	1.0	1.0	1.0	1.0	1.0	1.0	1.0	1.0	1.0	1.0	1.0	1.0	1.0	1.0	1.0	1.0	1.0
FAM3C_CLEC2D	1.0	1.0	1.0	1.0	1.0	1.0	1.0	1.0	1.0	1.0	1.0	1.0	1.0	1.0	1.0	1.0	1.0	1.0	1.0	1.0	1.0	1.0	1.0	1.0	1.0	1.0	1.0	1.0	1.0	1.0	1.0	1.0	1.0	1.0	1.0	1.0	1.0	1.0	1.0	1.0	1.0	1.0	1.0	1.0	1.0	1.0	1.0	1.0	1.0
TNF_DAG1	1.0	1.0	1.0	1.0	1.0	1.0	1.0	1.0	1.0	1.0	1.0	1.0	1.0	1.0	1.0	1.0	1.0	1.0	1.0	1.0	1.0	1.0	1.0	1.0	1.0	1.0	1.0	1.0	1.0	1.0	1.0	1.0	1.0	1.0	1.0	1.0	1.0	1.0	1.0	1.0	1.0	1.0	1.0	1.0	1.0	1.0	1.0	1.0	1.0
LGALS9_DAG1	1.0	1.0	1.0	1.0	1.0	1.0	1.0	1.0	1.0	1.0	1.0	1.0	1.0	1.0	1.0	1.0	1.0	1.0	1.0	1.0	1.0	1.0	1.0	1.0	1.0	1.0	1.0	1.0	1.0	1.0	1.0	1.0	1.0	1.0	1.0	1.0	1.0	1.0	1.0	1.0	1.0	1.0	1.0	1.0	1.0	1.0	1.0	1.0	1.0
TNF_NOTCH1	1.0	1.0	1.0	1.0	1.0	1.0	1.0	1.0	1.0	1.0	1.0	1.0	1.0	1.0	1.0	1.0	1.0	1.0	1.0	1.0	1.0	1.0	1.0	1.0	1.0	1.0	1.0	1.0	1.0	1.0	1.0	1.0	1.0	1.0	1.0	1.0	1.0	1.0	1.0	1.0	1.0	1.0	1.0	1.0	1.0	1.0	1.0	1.0	1.0
DLL1_NOTCH1	1.0	1.0	1.0	1.0	1.0	1.0	1.0	1.0	1.0	1.0	1.0	1.0	1.0	1.0	1.0	1.0	1.0	1.0	1.0	1.0	1.0	1.0	1.0	1.0	1.0	1.0	1.0	1.0	1.0	1.0	1.0	1.0	1.0	1.0	1.0	1.0	1.0	1.0	1.0	1.0	1.0	1.0	1.0	1.0	1.0	1.0	1.0	1.0	1.0
TNF_SEMA4C	1.0	1.0	1.0	1.0	1.0	1.0	1.0	1.0	1.0	1.0	1.0	1.0	1.0	1.0	1.0	1.0	1.0	1.0	1.0	1.0	1.0	1.0	1.0	1.0	1.0	1.0	1.0	1.0	1.0	1.0	1.0	1.0	1.0	1.0	1.0	1.0	1.0	1.0	1.0	1.0	1.0	1.0	1.0	1.0	1.0	1.0	1.0	1.0	1.0
PLXNB2_SEMA4C	1.0	1.0	1.0	1.0	1.0	1.0	1.0	1.0	1.0	1.0	1.0	1.0	1.0	1.0	1.0	1.0	1.0	1.0	1.0	1.0	1.0	1.0	1.0	1.0	1.0	1.0	1.0	1.0	1.0	1.0	1.0	1.0	1.0	1.0	1.0	1.0	1.0	1.0	1.0	1.0	1.0	1.0	1.0	1.0	1.0	1.0	1.0	1.0	1.0
TNF_TNFRSF1A	1.0	1.0	1.0	1.0	1.0	1.0	1.0	1.0	1.0	1.0	1.0	1.0	1.0	1.0	1.0	1.0	1.0	1.0	1.0	1.0	1.0	1.0	1.0	1.0	1.0	1.0	1.0	1.0	1.0	1.0	1.0	1.0	1.0	1.0	1.0	1.0	1.0	1.0	1.0	1.0	1.0	1.0	1.0	1.0	1.0	1.0	1.0	1.0	1.0
LTA_TNFRSF1A	1.0	1.0	1.0	1.0	1.0	1.0	1.0	1.0	1.0	1.0	1.0	1.0	1.0	1.0	1.0	1.0	1.0	1.0	1.0	1.0	1.0	1.0	1.0	1.0	1.0	1.0	1.0	1.0	1.0	1.0	1.0	1.0	1.0	1.0	1.0	1.0	1.0	1.0	1.0	1.0	1.0	1.0	1.0	1.0	1.0	1.0	1.0	1.0	1.0
TNFSF13_TNFRSF1A	1.0	1.0	1.0	1.0	1.0	1.0	1.0	1.0	1.0	1.0	1.0	1.0	1.0	1.0	1.0	1.0	1.0	1.0	1.0	1.0	1.0	1.0	1.0	1.0	1.0	1.0	1.0	1.0	1.0	1.0	1.0	1.0	1.0	1.0	1.0	1.0	1.0	1.0	1.0	1.0	1.0	1.0	1.0	1.0	1.0	1.0	1.0	1.0	1.0
TNF_FAS	1.0	1.0	1.0	1.0	1.0	1.0	1.0	1.0	1.0	1.0	1.0	1.0	1.0	1.0	1.0	1.0	1.0	1.0	1.0	1.0	1.0	1.0	1.0	1.0	1.0	1.0	1.0	1.0	1.0	1.0	1.0	1.0	1.0	1.0	1.0	1.0	1.0	1.0	1.0	1.0	1.0	1.0	1.0	1.0	1.0	1.0	1.0	1.0	1.0
TNFSF13_FAS	1.0	1.0	1.0	1.0	1.0	1.0	1.0	1.0	1.0	1.0	1.0	1.0	1.0	1.0	1.0	1.0	1.0	1.0	1.0	1.0	1.0	1.0	1.0	1.0	1.0	1.0	1.0	1.0	1.0	1.0	1.0	1.0	1.0	1.0	1.0	1.0	1.0	1.0	1.0	1.0	1.0	1.0	1.0	1.0	1.0	1.0	1.0	1.0	1.0
TNF_TNFRSF1B	1.0	1.0	1.0	1.0	1.0	1.0	1.0	1.0	1.0	1.0	1.0	1.0	1.0	1.0	1.0	1.0	1.0	1.0	1.0	1.0	1.0	1.0	1.0	1.0	1.0	1.0	1.0	1.0	1.0	1.0	1.0	1.0	1.0	1.0	1.0	1.0	1.0	1.0	1.0	1.0	1.0	1.0	1.0	1.0	1.0	1.0	1.0	1.0	1.0
LTA_TNFRSF1B	1.0	1.0	1.0	1.0	1.0	1.0	1.0	1.0	1.0	1.0	1.0	1.0	1.0	1.0	1.0	1.0	1.0	1.0	1.0	1.0	1.0	1.0	1.0	1.0	1.0	1.0	1.0	1.0	1.0	1.0	1.0	1.0	1.0	1.0	1.0	1.0	1.0	1.0	1.0	1.0	1.0	1.0	1.0	1.0	1.0	1.0	1.0	1.0	1.0
TNF_RIPK1	1.0	1.0	1.0	1.0	1.0	1.0	1.0	1.0	1.0	1.0	1.0	1.0	1.0	1.0	1.0	1.0	1.0	1.0	1.0	1.0	1.0	1.0	1.0	1.0	1.0	1.0	1.0	1.0	1.0	1.0	1.0	1.0	1.0	1.0	1.0	1.0	1.0	1.0	1.0	1.0	1.0	1.0	1.0	1.0	1.0	1.0	1.0	1.0	1.0
LTA_RIPK1	1.0	1.0	1.0	1.0	1.0	1.0	1.0	1.0	1.0	1.0	1.0	1.0	1.0	1.0	1.0	1.0	1.0	1.0	1.0	1.0	1.0	1.0	1.0	1.0	1.0	1.0	1.0	1.0	1.0	1.0	1.0	1.0	1.0	1.0	1.0	1.0	1.0	1.0	1.0	1.0	1.0	1.0	1.0	1.0	1.0	1.0	1.0	1.0	1.0
TNFSF10_RIPK1	1.0	1.0	1.0	1.0	1.0	1.0	1.0	1.0	1.0	1.0	1.0	1.0	1.0	1.0	1.0	1.0	1.0	1.0	1.0	1.0	1.0	1.0	1.0	1.0	1.0	1.0	1.0	1.0	1.0	1.0	1.0	1.0	1.0	1.0	1.0	1.0	1.0	1.0	1.0	1.0	1.0	1.0	1.0	1.0	1.0	1.0	1.0	1.0	1.0
TNF_PTPRS	1.0	1.0	1.0	1.0	1.0	1.0	1.0	1.0	1.0	1.0	1.0	1.0	1.0	1.0	1.0	1.0	1.0	1.0	1.0	1.0	1.0	1.0	1.0	1.0	1.0	1.0	1.0	1.0	1.0	1.0	1.0	1.0	1.0	1.0	1.0	1.0	1.0	1.0	1.0	1.0	1.0	1.0	1.0	1.0	1.0	1.0	1.0	1.0	1.0
PTN_PTPRS	1.0	1.0	1.0	1.0	1.0	1.0	1.0	1.0	1.0	1.0	1.0	1.0	1.0	1.0	1.0	1.0	1.0	1.0	1.0	1.0	1.0	1.0	1.0	1.0	1.0	1.0	1.0	1.0	1.0	1.0	1.0	1.0	1.0	1.0	1.0	1.0	1.0	1.0	1.0	1.0	1.0	1.0	1.0	1.0	1.0	1.0	1.0	1.0	1.0
TNF_CELSR2	1.0	1.0	1.0	1.0	1.0	1.0	1.0	1.0	1.0	1.0	1.0	1.0	1.0	1.0	1.0	1.0	1.0	1.0	1.0	1.0	1.0	1.0	1.0	1.0	1.0	1.0	1.0	1.0	1.0	1.0	1.0	1.0	1.0	1.0	1.0	1.0	1.0	1.0	1.0	1.0	1.0	1.0	1.0	1.0	1.0	1.0	1.0	1.0	1.0
CXCR3_CCL19	1.0	1.0	1.0	1.0	1.0	1.0	1.0	1.0	1.0	1.0	1.0	1.0	1.0	1.0	1.0	1.0	1.0	1.0	1.0	1.0	1.0	1.0	1.0	1.0	1.0	1.0	1.0	1.0	1.0	1.0	1.0	1.0	1.0	1.0	1.0	1.0	1.0	1.0	1.0	1.0	1.0	1.0	1.0	1.0	1.0	1.0	1.0	1.0	1.0
CCRL2_CCL19	1.0	1.0	1.0	1.0	1.0	1.0	1.0	1.0	1.0	1.0	1.0	1.0	1.0	1.0	1.0	1.0	1.0	1.0	1.0	1.0	1.0	1.0	1.0	1.0	1.0	1.0	1.0	1.0	1.0	1.0	1.0	1.0	1.0	1.0	1.0	1.0	1.0	1.0	1.0	1.0	1.0	1.0	1.0	1.0	1.0	1.0	1.0	1.0	1.0
CCR7_CCL19	1.0	1.0	1.0	1.0	1.0	1.0	1.0	1.0	1.0	1.0	1.0	1.0	1.0	1.0	1.0	1.0	1.0	1.0	1.0	1.0	1.0	1.0	1.0	1.0	1.0	1.0	1.0	1.0	1.0	1.0	1.0	1.0	1.0	1.0	1.0	1.0	1.0	1.0	1.0	1.0	1.0	1.0	1.0	1.0	1.0	1.0	1.0	1.0	1.0
DPP4_CXCL12	1.0	1.0	1.0	1.0	1.0	1.0	1.0	1.0	1.0	1.0	1.0	1.0	1.0	1.0	1.0	1.0	1.0	1.0	1.0	1.0	1.0	1.0	1.0	1.0	1.0	1.0	1.0	1.0	1.0	1.0	1.0	1.0	1.0	1.0	1.0	1.0	1.0	1.0	1.0	1.0	1.0	1.0	1.0	1.0	1.0	1.0	1.0	1.0	1.0
ACKR3_CXCL12	1.0	1.0	1.0	1.0	1.0	1.0	1.0	1.0	1.0	1.0	1.0	1.0	1.0	1.0	1.0	1.0	1.0	1.0	1.0	1.0	1.0	1.0	1.0	1.0	1.0	1.0	1.0	1.0	1.0	1.0	1.0	1.0	1.0	1.0	1.0	1.0	1.0	1.0	1.0	1.0	1.0	1.0	1.0	1.0	1.0	1.0	1.0	1.0	1.0
TNFRSF13B_TNFSF13	1.0	1.0	1.0	1.0	1.0	1.0	1.0	1.0	1.0	1.0	1.0	1.0	1.0	1.0	1.0	1.0	1.0	1.0	1.0	1.0	1.0	1.0	1.0	1.0	1.0	1.0	1.0	1.0	1.0	1.0	1.0	1.0	1.0	1.0	1.0	1.0	1.0	1.0	1.0	1.0	1.0	1.0	1.0	1.0	1.0	1.0	1.0	1.0	1.0
TNFRSF13B_CD70	1.0	1.0	1.0	1.0	1.0	1.0	1.0	1.0	1.0	1.0	1.0	1.0	1.0	1.0	1.0	1.0	1.0	1.0	1.0	1.0	1.0	1.0	1.0	1.0	1.0	1.0	1.0	1.0	1.0	1.0	1.0	1.0	1.0	1.0	1.0	1.0	1.0	1.0	1.0	1.0	1.0	1.0	1.0	1.0	1.0	1.0	1.0	1.0	1.0
CD27_CD70	1.0	1.0	1.0	1.0	1.0	1.0	1.0	1.0	1.0	1.0	1.0	1.0	1.0	1.0	1.0	1.0	1.0	1.0	1.0	1.0	1.0	1.0	1.0	1.0	1.0	1.0	1.0	1.0	1.0	1.0	1.0	1.0	1.0	1.0	1.0	1.0	1.0	1.0	1.0	1.0	1.0	1.0	1.0	1.0	1.0	1.0	1.0	1.0	1.0
CD40_CD40LG	1.0	1.0	1.0	1.0	1.0	1.0	1.0	1.0	1.0	1.0	1.0	1.0	1.0	1.0	1.0	1.0	1.0	1.0	1.0	1.0	1.0	1.0	1.0	1.0	1.0	1.0	1.0	1.0	1.0	1.0	1.0	1.0	1.0	1.0	1.0	1.0	1.0	1.0	1.0	1.0	1.0	1.0	1.0	1.0	1.0	1.0	1.0	1.0	1.0
HLA-DRB1_OGN	1.0	1.0	1.0	1.0	1.0	1.0	1.0	1.0	1.0	1.0	1.0	1.0	1.0	1.0	1.0	1.0	1.0	1.0	1.0	1.0	1.0	1.0	1.0	1.0	1.0	1.0	1.0	1.0	1.0	0.0	1.0	1.0	1.0	1.0	1.0	1.0	1.0	1.0	1.0	1.0	1.0	1.0	1.0	1.0	1.0	1.0	1.0	1.0	1.0
NOTCH2_IL24	1.0	1.0	1.0	1.0	1.0	1.0	1.0	1.0	1.0	1.0	1.0	1.0	1.0	1.0	1.0	1.0	1.0	1.0	1.0	1.0	1.0	1.0	1.0	1.0	1.0	1.0	1.0	1.0	1.0	1.0	1.0	1.0	1.0	1.0	1.0	1.0	1.0	1.0	1.0	1.0	1.0	1.0	1.0	1.0	1.0	1.0	1.0	1.0	1.0
NOTCH2_DLL3	1.0	1.0	1.0	1.0	1.0	1.0	1.0	1.0	1.0	1.0	1.0	1.0	1.0	1.0	1.0	1.0	1.0	1.0	1.0	1.0	1.0	1.0	1.0	1.0	1.0	1.0	1.0	1.0	1.0	1.0	1.0	1.0	1.0	1.0	1.0	1.0	1.0	1.0	1.0	1.0	1.0	1.0	1.0	1.0	1.0	1.0	1.0	1.0	1.0
NOTCH1_DLL3	1.0	1.0	1.0	1.0	1.0	1.0	1.0	1.0	1.0	1.0	1.0	1.0	1.0	1.0	1.0	1.0	1.0	1.0	1.0	1.0	1.0	1.0	1.0	1.0	1.0	1.0	1.0	1.0	1.0	1.0	1.0	1.0	1.0	1.0	1.0	1.0	1.0	1.0	1.0	1.0	1.0	1.0	1.0	1.0	1.0	1.0	1.0	1.0	1.0
NOTCH4_DLL3	1.0	1.0	1.0	1.0	1.0	1.0	1.0	1.0	1.0	1.0	1.0	1.0	1.0	1.0	1.0	1.0	1.0	1.0	1.0	1.0	1.0	1.0	1.0	1.0	1.0	1.0	1.0	1.0	1.0	1.0	1.0	1.0	1.0	1.0	1.0	1.0	1.0	1.0	1.0	1.0	1.0	1.0	1.0	1.0	1.0	1.0	1.0	1.0	1.0
NOTCH1_WNT4	1.0	1.0	1.0	1.0	1.0	1.0	1.0	1.0	1.0	1.0	1.0	1.0	1.0	1.0	1.0	1.0	1.0	1.0	1.0	1.0	1.0	1.0	1.0	1.0	1.0	1.0	1.0	1.0	1.0	1.0	1.0	1.0	1.0	1.0	1.0	1.0	1.0	1.0	1.0	1.0	1.0	1.0	1.0	1.0	1.0	1.0	1.0	1.0	1.0
FZD6_WNT4	1.0	1.0	1.0	1.0	1.0	1.0	1.0	1.0	1.0	1.0	1.0	1.0	1.0	1.0	1.0	1.0	1.0	1.0	1.0	1.0	1.0	1.0	1.0	1.0	1.0	1.0	1.0	1.0	1.0	1.0	1.0	1.0	1.0	1.0	1.0	1.0	1.0	1.0	1.0	1.0	1.0	1.0	1.0	1.0	1.0	1.0	1.0	1.0	1.0
NOTCH1_JAG1	1.0	1.0	1.0	1.0	1.0	1.0	1.0	1.0	1.0	1.0	1.0	1.0	1.0	1.0	1.0	1.0	1.0	1.0	1.0	1.0	1.0	1.0	1.0	1.0	1.0	1.0	1.0	1.0	1.0	1.0	1.0	1.0	1.0	1.0	1.0	1.0	1.0	1.0	1.0	1.0	1.0	1.0	1.0	1.0	1.0	1.0	1.0	1.0	1.0
CD46_JAG1	1.0	1.0	1.0	1.0	1.0	1.0	1.0	1.0	1.0	1.0	1.0	1.0	1.0	1.0	1.0	1.0	1.0	1.0	1.0	1.0	1.0	1.0	1.0	1.0	1.0	1.0	1.0	1.0	1.0	0.0	1.0	1.0	1.0	1.0	1.0	1.0	1.0	1.0	1.0	1.0	1.0	1.0	1.0	1.0	1.0	1.0	1.0	1.0	1.0
CCL2_CCR2	1.0	1.0	1.0	1.0	1.0	1.0	1.0	1.0	1.0	1.0	1.0	1.0	1.0	1.0	1.0	1.0	1.0	1.0	1.0	1.0	1.0	1.0	1.0	1.0	1.0	1.0	1.0	1.0	1.0	1.0	1.0	1.0	1.0	1.0	1.0	1.0	1.0	1.0	1.0	1.0	1.0	1.0	1.0	1.0	1.0	1.0	1.0	1.0	1.0
CCL3_CCR1	1.0	1.0	1.0	1.0	1.0	1.0	1.0	1.0	1.0	1.0	1.0	1.0	1.0	1.0	1.0	1.0	1.0	1.0	1.0	1.0	1.0	1.0	1.0	1.0	1.0	1.0	1.0	1.0	1.0	1.0	1.0	1.0	1.0	1.0	1.0	1.0	1.0	1.0	1.0	1.0	1.0	1.0	1.0	1.0	1.0	1.0	1.0	1.0	1.0
CCL5_CCR1	1.0	1.0	1.0	1.0	1.0	1.0	1.0	1.0	1.0	1.0	1.0	1.0	1.0	1.0	1.0	1.0	1.0	1.0	1.0	1.0	1.0	1.0	1.0	1.0	1.0	1.0	1.0	1.0	1.0	1.0	1.0	1.0	1.0	1.0	1.0	1.0	1.0	1.0	1.0	1.0	1.0	1.0	1.0	1.0	1.0	1.0	1.0	1.0	1.0
CCL3L1_CCR1	1.0	1.0	1.0	1.0	1.0	1.0	1.0	1.0	1.0	1.0	1.0	1.0	1.0	1.0	1.0	1.0	1.0	1.0	1.0	1.0	1.0	1.0	1.0	1.0	1.0	1.0	1.0	1.0	1.0	1.0	1.0	1.0	1.0	1.0	1.0	1.0	1.0	1.0	1.0	1.0	1.0	1.0	1.0	1.0	1.0	1.0	1.0	1.0	1.0
CCL2_ACKR1	1.0	1.0	1.0	1.0	1.0	1.0	1.0	1.0	1.0	1.0	1.0	1.0	1.0	1.0	1.0	1.0	1.0	1.0	1.0	1.0	1.0	1.0	1.0	1.0	1.0	1.0	1.0	1.0	1.0	1.0	1.0	1.0	1.0	1.0	1.0	1.0	1.0	1.0	1.0	1.0	1.0	1.0	1.0	1.0	1.0	1.0	1.0	1.0	1.0
CCL5_ACKR1	1.0	1.0	1.0	1.0	1.0	1.0	1.0	1.0	1.0	1.0	1.0	1.0	1.0	1.0	1.0	1.0	1.0	1.0	1.0	1.0	1.0	1.0	1.0	1.0	1.0	1.0	1.0	1.0	1.0	1.0	1.0	1.0	1.0	1.0	1.0	1.0	1.0	1.0	1.0	1.0	1.0	1.0	1.0	1.0	1.0	1.0	1.0	1.0	1.0
PF4_ACKR1	1.0	1.0	1.0	1.0	1.0	1.0	1.0	1.0	1.0	1.0	1.0	1.0	1.0	1.0	1.0	1.0	1.0	1.0	1.0	1.0	1.0	1.0	1.0	1.0	1.0	1.0	1.0	1.0	1.0	1.0	1.0	1.0	1.0	1.0	1.0	1.0	1.0	1.0	1.0	1.0	1.0	1.0	1.0	1.0	1.0	1.0	1.0	1.0	1.0
CXCL1_ACKR1	1.0	1.0	1.0	1.0	1.0	1.0	1.0	1.0	1.0	1.0	1.0	1.0	1.0	1.0	1.0	1.0	1.0	1.0	1.0	1.0	1.0	1.0	1.0	1.0	1.0	1.0	1.0	1.0	1.0	1.0	1.0	1.0	1.0	1.0	1.0	1.0	1.0	1.0	1.0	1.0	1.0	1.0	1.0	1.0	1.0	1.0	1.0	1.0	1.0
CXCL8_ACKR1	1.0	1.0	1.0	1.0	1.0	1.0	1.0	1.0	1.0	1.0	1.0	1.0	1.0	1.0	1.0	1.0	1.0	1.0	1.0	1.0	1.0	1.0	1.0	1.0	1.0	1.0	1.0	1.0	1.0	1.0	1.0	1.0	1.0	1.0	1.0	1.0	1.0	1.0	1.0	1.0	1.0	1.0	1.0	1.0	1.0	1.0	1.0	1.0	1.0
CCL8_ACKR1	1.0	1.0	1.0	1.0	1.0	1.0	1.0	1.0	1.0	1.0	1.0	1.0	1.0	1.0	1.0	1.0	1.0	1.0	1.0	1.0	1.0	1.0	1.0	1.0	1.0	1.0	1.0	1.0	1.0	1.0	1.0	1.0	1.0	1.0	1.0	1.0	1.0	1.0	1.0	1.0	1.0	1.0	1.0	1.0	1.0	1.0	1.0	1.0	1.0
CCL2_CCR10	1.0	1.0	1.0	1.0	1.0	1.0	1.0	1.0	1.0	1.0	1.0	1.0	1.0	1.0	1.0	1.0	1.0	1.0	1.0	1.0	1.0	1.0	1.0	1.0	1.0	1.0	1.0	1.0	1.0	1.0	1.0	1.0	1.0	1.0	1.0	1.0	1.0	1.0	1.0	1.0	1.0	1.0	1.0	1.0	1.0	1.0	1.0	1.0	1.0
CCL3L1_DPP4	1.0	1.0	1.0	1.0	1.0	1.0	1.0	1.0	1.0	1.0	1.0	1.0	1.0	1.0	1.0	1.0	1.0	1.0	1.0	1.0	1.0	1.0	1.0	1.0	1.0	1.0	1.0	1.0	1.0	1.0	1.0	1.0	1.0	1.0	1.0	1.0	1.0	1.0	1.0	1.0	1.0	1.0	1.0	1.0	1.0	1.0	1.0	1.0	1.0
CXCL10_DPP4	1.0	1.0	1.0	1.0	1.0	1.0	1.0	1.0	1.0	1.0	1.0	1.0	1.0	1.0	1.0	1.0	1.0	1.0	1.0	1.0	1.0	1.0	1.0	1.0	1.0	1.0	1.0	1.0	1.0	1.0	1.0	1.0	1.0	1.0	1.0	1.0	1.0	1.0	1.0	1.0	1.0	1.0	1.0	1.0	1.0	1.0	1.0	1.0	1.0
CXCL2_DPP4	1.0	1.0	1.0	1.0	1.0	1.0	1.0	1.0	1.0	1.0	1.0	1.0	1.0	1.0	1.0	1.0	1.0	1.0	1.0	1.0	1.0	1.0	1.0	1.0	1.0	1.0	1.0	1.0	1.0	1.0	1.0	1.0	1.0	1.0	1.0	1.0	1.0	1.0	1.0	1.0	1.0	1.0	1.0	1.0	1.0	1.0	1.0	1.0	1.0
PF4_CXCR3	1.0	1.0	1.0	1.0	1.0	1.0	1.0	1.0	1.0	1.0	1.0	1.0	1.0	1.0	1.0	1.0	1.0	1.0	1.0	1.0	1.0	1.0	1.0	1.0	1.0	1.0	1.0	1.0	1.0	1.0	1.0	1.0	1.0	1.0	1.0	1.0	1.0	1.0	1.0	1.0	1.0	1.0	1.0	1.0	1.0	1.0	1.0	1.0	1.0
CXCL10_CXCR3	1.0	1.0	1.0	1.0	1.0	1.0	1.0	1.0	1.0	1.0	1.0	1.0	1.0	1.0	1.0	1.0	1.0	1.0	1.0	1.0	1.0	1.0	1.0	1.0	1.0	1.0	1.0	1.0	1.0	1.0	1.0	1.0	1.0	1.0	1.0	1.0	1.0	1.0	1.0	1.0	1.0	1.0	1.0	1.0	1.0	1.0	1.0	1.0	1.0
CXCL12_CXCR3	1.0	1.0	1.0	1.0	1.0	1.0	1.0	1.0	1.0	1.0	1.0	1.0	1.0	1.0	1.0	1.0	1.0	1.0	1.0	1.0	1.0	1.0	1.0	1.0	1.0	1.0	1.0	1.0	1.0	1.0	1.0	1.0	1.0	1.0	1.0	1.0	1.0	1.0	1.0	1.0	1.0	1.0	1.0	1.0	1.0	1.0	1.0	1.0	1.0
CXCL1_CXCR2	1.0	1.0	1.0	1.0	1.0	1.0	1.0	1.0	1.0	1.0	1.0	1.0	1.0	1.0	1.0	1.0	1.0	1.0	1.0	1.0	1.0	1.0	1.0	1.0	1.0	1.0	1.0	1.0	1.0	1.0	1.0	1.0	1.0	1.0	1.0	1.0	1.0	1.0	1.0	1.0	1.0	1.0	1.0	1.0	1.0	1.0	1.0	1.0	1.0
CXCL8_CXCR2	1.0	1.0	1.0	1.0	1.0	1.0	1.0	1.0	1.0	1.0	1.0	1.0	1.0	1.0	1.0	1.0	1.0	1.0	1.0	1.0	1.0	1.0	1.0	1.0	1.0	1.0	1.0	1.0	1.0	1.0	1.0	1.0	1.0	1.0	1.0	1.0	1.0	1.0	1.0	1.0	1.0	1.0	1.0	1.0	1.0	1.0	1.0	1.0	1.0
CXCL2_CXCR2	1.0	1.0	1.0	1.0	1.0	1.0	1.0	1.0	1.0	1.0	1.0	1.0	1.0	1.0	1.0	1.0	1.0	1.0	1.0	1.0	1.0	1.0	1.0	1.0	1.0	1.0	1.0	1.0	1.0	1.0	1.0	1.0	1.0	1.0	1.0	1.0	1.0	1.0	1.0	1.0	1.0	1.0	1.0	1.0	1.0	1.0	1.0	1.0	1.0
PPBP_CXCR2	1.0	1.0	1.0	1.0	1.0	1.0	1.0	1.0	1.0	1.0	1.0	1.0	1.0	1.0	1.0	1.0	1.0	1.0	1.0	1.0	1.0	1.0	1.0	1.0	1.0	1.0	1.0	1.0	1.0	1.0	1.0	1.0	1.0	1.0	1.0	1.0	1.0	1.0	1.0	1.0	1.0	1.0	1.0	1.0	1.0	1.0	1.0	1.0	1.0
CXCL3_CXCR2	1.0	1.0	1.0	1.0	1.0	1.0	1.0	1.0	1.0	1.0	1.0	1.0	1.0	1.0	1.0	1.0	1.0	1.0	1.0	1.0	1.0	1.0	1.0	1.0	1.0	1.0	1.0	1.0	1.0	1.0	1.0	1.0	1.0	1.0	1.0	1.0	1.0	1.0	1.0	1.0	1.0	1.0	1.0	1.0	1.0	1.0	1.0	1.0	1.0
SCT_VIPR1	1.0	1.0	1.0	1.0	1.0	1.0	1.0	1.0	1.0	1.0	1.0	1.0	1.0	1.0	1.0	1.0	1.0	1.0	1.0	1.0	1.0	1.0	1.0	1.0	1.0	1.0	1.0	1.0	1.0	1.0	1.0	1.0	1.0	1.0	1.0	1.0	1.0	1.0	1.0	1.0	1.0	1.0	1.0	1.0	1.0	1.0	1.0	1.0	1.0
LGALS9_LRP1	1.0	1.0	1.0	1.0	1.0	1.0	1.0	1.0	1.0	1.0	1.0	1.0	1.0	1.0	1.0	1.0	1.0	1.0	1.0	1.0	1.0	1.0	1.0	1.0	1.0	1.0	1.0	1.0	1.0	1.0	1.0	1.0	1.0	1.0	1.0	1.0	1.0	1.0	1.0	1.0	1.0	1.0	1.0	1.0	1.0	0.0	1.0	0.0	0.011
MDK_LRP1	1.0	1.0	1.0	1.0	1.0	1.0	1.0	1.0	1.0	1.0	1.0	1.0	1.0	1.0	1.0	1.0	1.0	1.0	1.0	1.0	1.0	1.0	1.0	1.0	1.0	1.0	1.0	1.0	1.0	1.0	1.0	1.0	1.0	1.0	1.0	1.0	1.0	1.0	1.0	1.0	1.0	1.0	1.0	1.0	1.0	0.528	1.0	0.846	1.0
LGALS9_CD47	1.0	1.0	1.0	1.0	1.0	1.0	1.0	1.0	1.0	1.0	1.0	1.0	1.0	1.0	1.0	1.0	1.0	1.0	1.0	1.0	1.0	1.0	1.0	1.0	1.0	1.0	1.0	1.0	1.0	1.0	1.0	1.0	1.0	1.0	1.0	1.0	1.0	1.0	1.0	1.0	1.0	1.0	0.0	0.0	0.0	0.0	1.0	0.0	0.0
SIRPA_CD47	1.0	1.0	1.0	1.0	1.0	1.0	1.0	1.0	1.0	1.0	1.0	1.0	1.0	1.0	1.0	1.0	1.0	1.0	1.0	1.0	1.0	1.0	1.0	1.0	1.0	1.0	1.0	1.0	1.0	1.0	1.0	1.0	1.0	1.0	1.0	1.0	1.0	1.0	1.0	1.0	1.0	1.0	1.0	1.0	1.0	1.0	1.0	1.0	1.0
LGALS9_PTPRK	1.0	1.0	1.0	1.0	1.0	1.0	1.0	1.0	1.0	1.0	1.0	1.0	1.0	1.0	1.0	1.0	1.0	1.0	1.0	1.0	1.0	1.0	1.0	1.0	1.0	1.0	1.0	1.0	1.0	1.0	1.0	1.0	1.0	1.0	1.0	1.0	1.0	1.0	1.0	1.0	1.0	1.0	1.0	1.0	1.0	1.0	1.0	1.0	1.0
WNT5A_PTPRK	1.0	1.0	1.0	1.0	1.0	1.0	1.0	1.0	1.0	1.0	1.0	1.0	1.0	1.0	1.0	1.0	1.0	1.0	1.0	1.0	1.0	1.0	1.0	1.0	1.0	1.0	1.0	1.0	1.0	1.0	1.0	1.0	1.0	1.0	1.0	1.0	1.0	1.0	1.0	1.0	1.0	1.0	1.0	1.0	1.0	1.0	1.0	1.0	1.0
LGALS9_SLC1A5	1.0	1.0	1.0	1.0	1.0	1.0	1.0	1.0	1.0	1.0	1.0	1.0	1.0	1.0	1.0	1.0	1.0	1.0	1.0	1.0	1.0	1.0	1.0	1.0	1.0	1.0	1.0	1.0	1.0	1.0	1.0	1.0	1.0	1.0	1.0	1.0	1.0	1.0	1.0	1.0	1.0	1.0	0.0	1.0	1.0	0.0	1.0	0.0	1.0
LGALS9_COLEC12	1.0	1.0	1.0	1.0	1.0	1.0	1.0	1.0	1.0	1.0	1.0	1.0	1.0	1.0	1.0	1.0	1.0	1.0	1.0	1.0	1.0	1.0	1.0	1.0	1.0	1.0	1.0	1.0	1.0	1.0	1.0	1.0	1.0	1.0	1.0	1.0	1.0	1.0	1.0	1.0	1.0	1.0	1.0	1.0	1.0	1.0	1.0	1.0	1.0
LGALS9_HAVCR2	1.0	1.0	1.0	1.0	1.0	1.0	1.0	1.0	1.0	1.0	1.0	1.0	1.0	1.0	1.0	1.0	1.0	1.0	1.0	1.0	1.0	1.0	1.0	1.0	1.0	1.0	1.0	1.0	1.0	1.0	1.0	1.0	1.0	1.0	1.0	1.0	1.0	1.0	1.0	1.0	1.0	1.0	1.0	1.0	1.0	1.0	1.0	1.0	1.0
LGALS9_SORL1	1.0	1.0	1.0	1.0	1.0	1.0	1.0	1.0	1.0	1.0	1.0	1.0	1.0	1.0	1.0	1.0	1.0	1.0	1.0	1.0	1.0	1.0	1.0	1.0	1.0	1.0	1.0	1.0	1.0	1.0	1.0	1.0	1.0	1.0	1.0	1.0	1.0	1.0	1.0	1.0	1.0	1.0	1.0	1.0	1.0	1.0	1.0	1.0	1.0
MDK_SORL1	1.0	1.0	1.0	1.0	1.0	1.0	1.0	1.0	1.0	1.0	1.0	1.0	1.0	1.0	1.0	1.0	1.0	1.0	1.0	1.0	1.0	1.0	1.0	1.0	1.0	1.0	1.0	1.0	1.0	1.0	1.0	1.0	1.0	1.0	1.0	1.0	1.0	1.0	1.0	1.0	1.0	1.0	1.0	1.0	1.0	1.0	1.0	1.0	1.0
PDGFA_PDGFRA	1.0	1.0	1.0	1.0	1.0	1.0	1.0	1.0	1.0	1.0	1.0	1.0	1.0	1.0	1.0	1.0	1.0	1.0	1.0	1.0	1.0	1.0	1.0	1.0	1.0	1.0	1.0	1.0	1.0	1.0	1.0	1.0	1.0	1.0	1.0	1.0	1.0	1.0	1.0	1.0	1.0	1.0	1.0	1.0	1.0	1.0	1.0	1.0	1.0
WNT4_FZD8	1.0	1.0	1.0	1.0	1.0	1.0	1.0	1.0	1.0	1.0	1.0	1.0	1.0	1.0	1.0	1.0	1.0	1.0	1.0	1.0	1.0	1.0	1.0	1.0	1.0	1.0	1.0	1.0	1.0	1.0	1.0	1.0	1.0	1.0	1.0	1.0	1.0	1.0	1.0	1.0	1.0	1.0	1.0	1.0	1.0	1.0	1.0	1.0	1.0
WNT5A_FZD1	1.0	1.0	1.0	1.0	1.0	1.0	1.0	1.0	1.0	1.0	1.0	1.0	1.0	1.0	1.0	1.0	1.0	1.0	1.0	1.0	1.0	1.0	1.0	1.0	1.0	1.0	1.0	1.0	1.0	1.0	1.0	1.0	1.0	1.0	1.0	1.0	1.0	1.0	1.0	1.0	1.0	1.0	1.0	1.0	1.0	1.0	1.0	1.0	1.0
WNT4_FZD1	1.0	1.0	1.0	1.0	1.0	1.0	1.0	1.0	1.0	1.0	1.0	1.0	1.0	1.0	1.0	1.0	1.0	1.0	1.0	1.0	1.0	1.0	1.0	1.0	1.0	1.0	1.0	1.0	1.0	1.0	1.0	1.0	1.0	1.0	1.0	1.0	1.0	1.0	1.0	1.0	1.0	1.0	1.0	1.0	1.0	1.0	1.0	1.0	1.0
WNT5A_FZD2	1.0	1.0	1.0	1.0	1.0	1.0	1.0	1.0	1.0	1.0	1.0	1.0	1.0	1.0	1.0	1.0	1.0	1.0	1.0	1.0	1.0	1.0	1.0	1.0	1.0	1.0	1.0	1.0	1.0	1.0	1.0	1.0	1.0	1.0	1.0	1.0	1.0	1.0	1.0	1.0	1.0	1.0	1.0	1.0	1.0	1.0	1.0	1.0	1.0
WNT5A_FZD5	1.0	1.0	1.0	1.0	1.0	1.0	1.0	1.0	1.0	1.0	1.0	1.0	1.0	1.0	1.0	1.0	1.0	1.0	1.0	1.0	1.0	1.0	1.0	1.0	1.0	1.0	1.0	1.0	1.0	1.0	1.0	1.0	1.0	1.0	1.0	1.0	1.0	1.0	1.0	1.0	1.0	1.0	1.0	1.0	1.0	1.0	1.0	1.0	1.0
WNT5A_ANTXR1	1.0	1.0	1.0	1.0	1.0	1.0	1.0	1.0	1.0	1.0	1.0	1.0	1.0	1.0	1.0	1.0	1.0	1.0	1.0	1.0	1.0	1.0	1.0	1.0	1.0	1.0	1.0	1.0	1.0	1.0	1.0	1.0	1.0	1.0	1.0	1.0	1.0	1.0	1.0	1.0	1.0	1.0	1.0	1.0	1.0	1.0	1.0	1.0	1.0
GDF11_ANTXR1	1.0	1.0	1.0	1.0	1.0	1.0	1.0	1.0	1.0	1.0	1.0	1.0	1.0	1.0	1.0	1.0	1.0	1.0	1.0	1.0	1.0	1.0	1.0	1.0	1.0	1.0	1.0	1.0	1.0	1.0	1.0	1.0	1.0	1.0	1.0	1.0	1.0	1.0	1.0	1.0	1.0	1.0	1.0	1.0	1.0	1.0	1.0	1.0	1.0
WNT5A_ROR2	1.0	1.0	1.0	1.0	1.0	1.0	1.0	1.0	1.0	1.0	1.0	1.0	1.0	1.0	1.0	1.0	1.0	1.0	1.0	1.0	1.0	1.0	1.0	1.0	1.0	1.0	1.0	1.0	1.0	1.0	1.0	1.0	1.0	1.0	1.0	1.0	1.0	1.0	1.0	1.0	1.0	1.0	1.0	1.0	1.0	1.0	1.0	1.0	1.0
WNT5A_FZD3	1.0	1.0	1.0	1.0	1.0	1.0	1.0	1.0	1.0	1.0	1.0	1.0	1.0	1.0	1.0	1.0	1.0	1.0	1.0	1.0	1.0	1.0	1.0	1.0	1.0	1.0	1.0	1.0	1.0	1.0	1.0	1.0	1.0	1.0	1.0	1.0	1.0	1.0	1.0	1.0	1.0	1.0	1.0	1.0	1.0	1.0	1.0	1.0	1.0
TNFRSF10A_TNFSF10	1.0	1.0	1.0	1.0	1.0	1.0	1.0	1.0	1.0	1.0	1.0	1.0	1.0	1.0	1.0	1.0	1.0	1.0	1.0	1.0	1.0	1.0	1.0	1.0	1.0	1.0	1.0	1.0	1.0	1.0	1.0	1.0	1.0	1.0	1.0	1.0	1.0	1.0	1.0	1.0	1.0	1.0	1.0	1.0	1.0	1.0	1.0	1.0	1.0
TNFRSF11B_TNFSF10	1.0	1.0	1.0	1.0	1.0	1.0	1.0	1.0	1.0	1.0	1.0	1.0	1.0	1.0	1.0	1.0	1.0	1.0	1.0	1.0	1.0	1.0	1.0	1.0	1.0	1.0	1.0	1.0	1.0	1.0	1.0	1.0	1.0	1.0	1.0	1.0	1.0	1.0	1.0	1.0	1.0	1.0	1.0	1.0	1.0	1.0	1.0	1.0	1.0
TNFRSF10B_TNFSF10	1.0	1.0	1.0	1.0	1.0	1.0	1.0	1.0	1.0	1.0	1.0	1.0	1.0	1.0	1.0	1.0	1.0	1.0	1.0	1.0	1.0	1.0	1.0	1.0	1.0	1.0	1.0	1.0	1.0	1.0	1.0	1.0	1.0	1.0	1.0	1.0	1.0	1.0	1.0	1.0	1.0	1.0	1.0	1.0	1.0	1.0	1.0	1.0	1.0
TNFRSF10C_TNFSF10	1.0	1.0	1.0	1.0	1.0	1.0	1.0	1.0	1.0	1.0	1.0	1.0	1.0	1.0	1.0	1.0	1.0	1.0	1.0	1.0	1.0	1.0	1.0	1.0	1.0	1.0	1.0	1.0	1.0	1.0	1.0	1.0	1.0	1.0	1.0	1.0	1.0	1.0	1.0	1.0	1.0	1.0	1.0	1.0	1.0	1.0	1.0	1.0	1.0
FGFR1_NCAM1	1.0	1.0	1.0	1.0	1.0	1.0	1.0	1.0	1.0	1.0	1.0	1.0	1.0	1.0	1.0	1.0	1.0	1.0	1.0	1.0	1.0	1.0	1.0	1.0	1.0	1.0	1.0	1.0	1.0	1.0	1.0	1.0	1.0	1.0	1.0	1.0	1.0	1.0	1.0	1.0	1.0	1.0	1.0	1.0	1.0	1.0	1.0	1.0	1.0
FGFR1_FGF7	1.0	1.0	1.0	1.0	1.0	1.0	1.0	1.0	1.0	1.0	1.0	1.0	1.0	1.0	1.0	1.0	1.0	1.0	1.0	1.0	1.0	1.0	1.0	1.0	1.0	1.0	1.0	1.0	1.0	1.0	1.0	1.0	1.0	1.0	1.0	1.0	1.0	1.0	1.0	1.0	1.0	1.0	1.0	1.0	1.0	1.0	1.0	1.0	1.0
FGFR1_KL	1.0	1.0	1.0	1.0	1.0	1.0	1.0	1.0	1.0	1.0	1.0	1.0	1.0	1.0	1.0	1.0	1.0	1.0	1.0	1.0	1.0	1.0	1.0	1.0	1.0	1.0	1.0	1.0	1.0	1.0	1.0	1.0	1.0	1.0	1.0	1.0	1.0	1.0	1.0	1.0	1.0	1.0	1.0	1.0	1.0	1.0	1.0	1.0	1.0
FGFR2_EPHA4	1.0	1.0	1.0	1.0	1.0	1.0	1.0	1.0	1.0	1.0	1.0	1.0	1.0	1.0	1.0	1.0	1.0	1.0	1.0	1.0	1.0	1.0	1.0	1.0	1.0	1.0	1.0	1.0	1.0	1.0	1.0	1.0	1.0	1.0	1.0	1.0	1.0	1.0	1.0	1.0	1.0	1.0	1.0	1.0	1.0	1.0	1.0	1.0	1.0
EFNA1_EPHA4	1.0	1.0	1.0	1.0	1.0	1.0	1.0	1.0	1.0	1.0	1.0	1.0	1.0	1.0	1.0	1.0	1.0	1.0	1.0	1.0	1.0	1.0	1.0	1.0	1.0	1.0	1.0	1.0	1.0	1.0	1.0	1.0	1.0	1.0	1.0	1.0	1.0	1.0	1.0	1.0	1.0	1.0	1.0	1.0	1.0	1.0	1.0	1.0	1.0
EFNA3_EPHA4	1.0	1.0	1.0	1.0	1.0	1.0	1.0	1.0	1.0	1.0	1.0	1.0	1.0	1.0	1.0	1.0	1.0	1.0	1.0	1.0	1.0	1.0	1.0	1.0	1.0	1.0	1.0	1.0	1.0	1.0	1.0	1.0	1.0	1.0	1.0	1.0	1.0	1.0	1.0	1.0	1.0	1.0	1.0	1.0	1.0	1.0	1.0	1.0	1.0
EFNA4_EPHA4	1.0	1.0	1.0	1.0	1.0	1.0	1.0	1.0	1.0	1.0	1.0	1.0	1.0	1.0	1.0	1.0	1.0	1.0	1.0	1.0	1.0	1.0	1.0	1.0	1.0	1.0	1.0	1.0	1.0	1.0	1.0	1.0	1.0	1.0	1.0	1.0	1.0	1.0	1.0	1.0	1.0	1.0	1.0	1.0	1.0	1.0	1.0	1.0	1.0
EFNA5_EPHA4	1.0	1.0	1.0	1.0	1.0	1.0	1.0	1.0	1.0	1.0	1.0	1.0	1.0	1.0	1.0	1.0	1.0	1.0	1.0	1.0	1.0	1.0	1.0	1.0	1.0	1.0	1.0	1.0	1.0	1.0	1.0	1.0	1.0	1.0	1.0	1.0	1.0	1.0	1.0	1.0	1.0	1.0	1.0	1.0	1.0	1.0	1.0	1.0	1.0
FGFR3_EPHA4	1.0	1.0	1.0	1.0	1.0	1.0	1.0	1.0	1.0	1.0	1.0	1.0	1.0	1.0	1.0	1.0	1.0	1.0	1.0	1.0	1.0	1.0	1.0	1.0	1.0	1.0	1.0	1.0	1.0	1.0	1.0	1.0	1.0	1.0	1.0	1.0	1.0	1.0	1.0	1.0	1.0	1.0	1.0	1.0	1.0	1.0	1.0	1.0	1.0
FGFR2_CD83	1.0	1.0	1.0	1.0	1.0	1.0	1.0	1.0	1.0	1.0	1.0	1.0	1.0	1.0	1.0	1.0	1.0	1.0	1.0	1.0	1.0	1.0	1.0	1.0	1.0	1.0	1.0	1.0	1.0	1.0	1.0	1.0	1.0	1.0	1.0	1.0	1.0	1.0	1.0	1.0	1.0	1.0	1.0	1.0	1.0	1.0	1.0	1.0	1.0
FGFR2_NECTIN1	1.0	1.0	1.0	1.0	1.0	1.0	1.0	1.0	1.0	1.0	1.0	1.0	1.0	1.0	1.0	1.0	1.0	1.0	1.0	1.0	1.0	1.0	1.0	1.0	1.0	1.0	1.0	1.0	1.0	1.0	1.0	1.0	1.0	1.0	1.0	1.0	1.0	1.0	1.0	1.0	1.0	1.0	1.0	1.0	1.0	1.0	1.0	1.0	1.0
FGFR3_NECTIN1	1.0	1.0	1.0	1.0	1.0	1.0	1.0	1.0	1.0	1.0	1.0	1.0	1.0	1.0	1.0	1.0	1.0	1.0	1.0	1.0	1.0	1.0	1.0	1.0	1.0	1.0	1.0	1.0	1.0	1.0	1.0	1.0	1.0	1.0	1.0	1.0	1.0	1.0	1.0	1.0	1.0	1.0	1.0	1.0	1.0	1.0	1.0	1.0	1.0
CD96_NECTIN1	1.0	1.0	1.0	1.0	1.0	1.0	1.0	1.0	1.0	1.0	1.0	1.0	1.0	1.0	1.0	1.0	1.0	1.0	1.0	1.0	1.0	1.0	1.0	1.0	1.0	1.0	1.0	1.0	1.0	1.0	1.0	1.0	1.0	1.0	1.0	1.0	1.0	1.0	1.0	1.0	1.0	1.0	1.0	1.0	1.0	1.0	1.0	1.0	1.0
FGFR2_XPR1	1.0	1.0	1.0	1.0	1.0	1.0	1.0	1.0	1.0	1.0	1.0	1.0	1.0	1.0	1.0	1.0	1.0	1.0	1.0	1.0	1.0	1.0	1.0	1.0	1.0	1.0	1.0	1.0	1.0	1.0	1.0	1.0	1.0	1.0	1.0	1.0	1.0	1.0	1.0	1.0	1.0	1.0	1.0	1.0	1.0	1.0	1.0	1.0	1.0
WNT4_SMO	1.0	1.0	1.0	1.0	1.0	1.0	1.0	1.0	1.0	1.0	1.0	1.0	1.0	1.0	1.0	1.0	1.0	1.0	1.0	1.0	1.0	1.0	1.0	1.0	1.0	1.0	1.0	1.0	1.0	1.0	1.0	1.0	1.0	1.0	1.0	1.0	1.0	1.0	1.0	1.0	1.0	1.0	1.0	1.0	1.0	1.0	1.0	1.0	1.0
BMP2_SMO	1.0	1.0	1.0	1.0	1.0	1.0	1.0	1.0	1.0	1.0	1.0	1.0	1.0	1.0	1.0	1.0	1.0	1.0	1.0	1.0	1.0	1.0	1.0	1.0	1.0	1.0	1.0	1.0	1.0	1.0	1.0	1.0	1.0	1.0	1.0	1.0	1.0	1.0	1.0	1.0	1.0	1.0	1.0	1.0	1.0	1.0	1.0	1.0	1.0
DLL1_NOTCH2	1.0	1.0	1.0	1.0	1.0	1.0	1.0	1.0	1.0	1.0	1.0	1.0	1.0	1.0	1.0	1.0	1.0	1.0	1.0	1.0	1.0	1.0	1.0	1.0	1.0	1.0	1.0	1.0	1.0	1.0	1.0	1.0	1.0	1.0	1.0	1.0	1.0	1.0	1.0	1.0	1.0	1.0	1.0	1.0	1.0	1.0	1.0	1.0	1.0
JAG1_NOTCH2	1.0	1.0	1.0	1.0	1.0	1.0	1.0	1.0	1.0	1.0	1.0	1.0	1.0	1.0	1.0	1.0	1.0	1.0	1.0	1.0	1.0	1.0	1.0	1.0	1.0	1.0	1.0	1.0	1.0	1.0	1.0	1.0	1.0	1.0	1.0	1.0	1.0	1.0	1.0	1.0	1.0	1.0	1.0	1.0	1.0	1.0	1.0	1.0	1.0
DLL1_NOTCH4	1.0	1.0	1.0	1.0	1.0	1.0	1.0	1.0	1.0	1.0	1.0	1.0	1.0	1.0	1.0	1.0	1.0	1.0	1.0	1.0	1.0	1.0	1.0	1.0	1.0	1.0	1.0	1.0	1.0	1.0	1.0	1.0	1.0	1.0	1.0	1.0	1.0	1.0	1.0	1.0	1.0	1.0	1.0	1.0	1.0	1.0	1.0	1.0	1.0
JAG1_NOTCH4	1.0	1.0	1.0	1.0	1.0	1.0	1.0	1.0	1.0	1.0	1.0	1.0	1.0	1.0	1.0	1.0	1.0	1.0	1.0	1.0	1.0	1.0	1.0	1.0	1.0	1.0	1.0	1.0	1.0	1.0	1.0	1.0	1.0	1.0	1.0	1.0	1.0	1.0	1.0	1.0	1.0	1.0	1.0	1.0	1.0	1.0	1.0	1.0	1.0
DLL1_NOTCH3	1.0	1.0	1.0	1.0	1.0	1.0	1.0	1.0	1.0	1.0	1.0	1.0	1.0	1.0	1.0	1.0	1.0	1.0	1.0	1.0	1.0	1.0	1.0	1.0	1.0	1.0	1.0	1.0	1.0	1.0	1.0	1.0	1.0	1.0	1.0	1.0	1.0	1.0	1.0	1.0	1.0	1.0	1.0	1.0	1.0	1.0	1.0	1.0	1.0
JAG1_NOTCH3	1.0	1.0	1.0	1.0	1.0	1.0	1.0	1.0	1.0	1.0	1.0	1.0	1.0	1.0	1.0	1.0	1.0	1.0	1.0	1.0	1.0	1.0	1.0	1.0	1.0	1.0	1.0	1.0	1.0	1.0	1.0	1.0	1.0	1.0	1.0	1.0	1.0	1.0	1.0	1.0	1.0	1.0	1.0	1.0	1.0	1.0	1.0	1.0	1.0
SCGB3A1_NOTCH3	1.0	1.0	1.0	1.0	1.0	1.0	1.0	1.0	1.0	1.0	1.0	1.0	1.0	1.0	1.0	1.0	1.0	1.0	1.0	1.0	1.0	1.0	1.0	1.0	1.0	1.0	1.0	1.0	1.0	1.0	1.0	1.0	1.0	1.0	1.0	1.0	1.0	1.0	1.0	1.0	1.0	1.0	1.0	1.0	1.0	1.0	1.0	1.0	1.0
DLL3_NOTCH3	1.0	1.0	1.0	1.0	1.0	1.0	1.0	1.0	1.0	1.0	1.0	1.0	1.0	1.0	1.0	1.0	1.0	1.0	1.0	1.0	1.0	1.0	1.0	1.0	1.0	1.0	1.0	1.0	1.0	1.0	1.0	1.0	1.0	1.0	1.0	1.0	1.0	1.0	1.0	1.0	1.0	1.0	1.0	1.0	1.0	1.0	1.0	1.0	1.0
PLXNB2_PTN	1.0	1.0	1.0	1.0	1.0	1.0	1.0	1.0	1.0	1.0	1.0	1.0	1.0	1.0	1.0	1.0	1.0	1.0	1.0	1.0	1.0	1.0	1.0	1.0	1.0	1.0	1.0	1.0	1.0	1.0	1.0	1.0	1.0	1.0	1.0	1.0	1.0	1.0	1.0	1.0	1.0	1.0	1.0	1.0	1.0	1.0	1.0	1.0	1.0
PLXNB2_SEMA4D	1.0	1.0	1.0	1.0	1.0	1.0	1.0	1.0	1.0	1.0	1.0	1.0	1.0	1.0	1.0	1.0	1.0	1.0	1.0	1.0	1.0	1.0	1.0	1.0	1.0	1.0	1.0	1.0	1.0	1.0	1.0	1.0	1.0	1.0	1.0	1.0	1.0	1.0	1.0	1.0	1.0	1.0	1.0	1.0	1.0	1.0	1.0	1.0	1.0
PLXNB1_SEMA4D	1.0	1.0	1.0	1.0	1.0	1.0	1.0	1.0	1.0	1.0	1.0	1.0	1.0	1.0	1.0	1.0	1.0	1.0	1.0	1.0	1.0	1.0	1.0	1.0	1.0	1.0	1.0	1.0	1.0	1.0	1.0	1.0	1.0	1.0	1.0	1.0	1.0	1.0	1.0	1.0	1.0	1.0	1.0	1.0	1.0	1.0	1.0	1.0	1.0
CD72_SEMA4D	1.0	1.0	1.0	1.0	1.0	1.0	1.0	1.0	1.0	1.0	1.0	1.0	1.0	1.0	1.0	1.0	1.0	1.0	1.0	1.0	1.0	1.0	1.0	1.0	1.0	1.0	1.0	1.0	1.0	1.0	1.0	1.0	1.0	1.0	1.0	1.0	1.0	1.0	1.0	1.0	1.0	1.0	1.0	1.0	1.0	1.0	1.0	1.0	1.0
LTA_TNFRSF14	1.0	1.0	1.0	1.0	1.0	1.0	1.0	1.0	1.0	1.0	1.0	1.0	1.0	1.0	1.0	1.0	1.0	1.0	1.0	1.0	1.0	1.0	1.0	1.0	1.0	1.0	1.0	1.0	1.0	1.0	1.0	1.0	1.0	1.0	1.0	1.0	1.0	1.0	1.0	1.0	1.0	1.0	1.0	1.0	1.0	1.0	1.0	1.0	1.0
TNFSF13_TNFRSF14	1.0	1.0	1.0	1.0	1.0	1.0	1.0	1.0	1.0	1.0	1.0	1.0	1.0	1.0	1.0	1.0	1.0	1.0	1.0	1.0	1.0	1.0	1.0	1.0	1.0	1.0	1.0	1.0	1.0	1.0	1.0	1.0	1.0	1.0	1.0	1.0	1.0	1.0	1.0	1.0	1.0	1.0	1.0	1.0	1.0	1.0	1.0	1.0	1.0
TNFSF14_TNFRSF14	1.0	1.0	1.0	1.0	1.0	1.0	1.0	1.0	1.0	1.0	1.0	1.0	1.0	1.0	1.0	1.0	1.0	1.0	1.0	1.0	1.0	1.0	1.0	1.0	1.0	1.0	1.0	1.0	1.0	1.0	1.0	1.0	1.0	1.0	1.0	1.0	1.0	1.0	1.0	1.0	1.0	1.0	1.0	1.0	1.0	1.0	1.0	1.0	1.0
CD160_TNFRSF14	1.0	1.0	1.0	1.0	1.0	1.0	1.0	1.0	1.0	1.0	1.0	1.0	1.0	1.0	1.0	1.0	1.0	1.0	1.0	1.0	1.0	1.0	1.0	1.0	1.0	1.0	1.0	1.0	1.0	1.0	1.0	1.0	1.0	1.0	1.0	1.0	1.0	1.0	1.0	1.0	1.0	1.0	1.0	1.0	1.0	1.0	1.0	1.0	1.0
MIF_TNFRSF14	1.0	1.0	1.0	1.0	1.0	1.0	1.0	1.0	1.0	1.0	1.0	1.0	1.0	1.0	1.0	1.0	1.0	1.0	1.0	1.0	1.0	1.0	1.0	1.0	1.0	1.0	1.0	1.0	1.0	1.0	1.0	1.0	1.0	1.0	1.0	1.0	1.0	1.0	1.0	1.0	1.0	1.0	1.0	1.0	1.0	1.0	1.0	1.0	1.0
BTLA_TNFRSF14	1.0	1.0	1.0	1.0	1.0	1.0	1.0	1.0	1.0	1.0	1.0	1.0	1.0	1.0	1.0	1.0	1.0	1.0	1.0	1.0	1.0	1.0	1.0	1.0	1.0	1.0	1.0	1.0	1.0	1.0	1.0	1.0	1.0	1.0	1.0	1.0	1.0	1.0	1.0	1.0	1.0	1.0	1.0	1.0	1.0	1.0	1.0	1.0	1.0
TNFSF13_TNFRSF17	1.0	1.0	1.0	1.0	1.0	1.0	1.0	1.0	1.0	1.0	1.0	1.0	1.0	1.0	1.0	1.0	1.0	1.0	1.0	1.0	1.0	1.0	1.0	1.0	1.0	1.0	1.0	1.0	1.0	1.0	1.0	1.0	1.0	1.0	1.0	1.0	1.0	1.0	1.0	1.0	1.0	1.0	1.0	1.0	1.0	1.0	1.0	1.0	1.0
CD70_TNFRSF17	1.0	1.0	1.0	1.0	1.0	1.0	1.0	1.0	1.0	1.0	1.0	1.0	1.0	1.0	1.0	1.0	1.0	1.0	1.0	1.0	1.0	1.0	1.0	1.0	1.0	1.0	1.0	1.0	1.0	1.0	1.0	1.0	1.0	1.0	1.0	1.0	1.0	1.0	1.0	1.0	1.0	1.0	1.0	1.0	1.0	1.0	1.0	1.0	1.0
TNFSF10_TNFRSF10D	1.0	1.0	1.0	1.0	1.0	1.0	1.0	1.0	1.0	1.0	1.0	1.0	1.0	1.0	1.0	1.0	1.0	1.0	1.0	1.0	1.0	1.0	1.0	1.0	1.0	1.0	1.0	1.0	1.0	1.0	1.0	1.0	1.0	1.0	1.0	1.0	1.0	1.0	1.0	1.0	1.0	1.0	1.0	1.0	1.0	1.0	1.0	1.0	1.0
MIF_TNFRSF10D	1.0	1.0	1.0	1.0	1.0	1.0	1.0	1.0	1.0	1.0	1.0	1.0	1.0	1.0	1.0	1.0	1.0	1.0	1.0	1.0	1.0	1.0	1.0	1.0	1.0	1.0	1.0	1.0	1.0	1.0	1.0	1.0	1.0	1.0	1.0	1.0	1.0	1.0	1.0	1.0	1.0	1.0	1.0	1.0	1.0	1.0	1.0	1.0	1.0
EFNA1_EPHA1	1.0	1.0	1.0	1.0	1.0	1.0	1.0	1.0	1.0	1.0	1.0	1.0	1.0	1.0	1.0	1.0	1.0	1.0	1.0	1.0	1.0	1.0	1.0	1.0	1.0	1.0	1.0	1.0	1.0	1.0	1.0	1.0	1.0	1.0	1.0	1.0	1.0	1.0	1.0	1.0	1.0	1.0	1.0	1.0	1.0	1.0	1.0	1.0	1.0
EFNA1_EPHA2	1.0	1.0	1.0	1.0	1.0	1.0	1.0	1.0	1.0	1.0	1.0	1.0	1.0	1.0	1.0	1.0	1.0	1.0	1.0	1.0	1.0	1.0	1.0	1.0	1.0	1.0	1.0	1.0	1.0	1.0	1.0	1.0	1.0	1.0	1.0	1.0	1.0	1.0	1.0	1.0	1.0	1.0	1.0	1.0	1.0	1.0	1.0	1.0	1.0
TNFRSF11B_TNFSF11	1.0	1.0	1.0	1.0	1.0	1.0	1.0	1.0	1.0	1.0	1.0	1.0	1.0	1.0	1.0	1.0	1.0	1.0	1.0	1.0	1.0	1.0	1.0	1.0	1.0	1.0	1.0	1.0	1.0	1.0	1.0	1.0	1.0	1.0	1.0	1.0	1.0	1.0	1.0	1.0	1.0	1.0	1.0	1.0	1.0	1.0	1.0	1.0	1.0
POMC_MC1R	1.0	1.0	1.0	1.0	1.0	1.0	1.0	1.0	1.0	1.0	1.0	1.0	1.0	1.0	1.0	1.0	1.0	1.0	1.0	1.0	1.0	1.0	1.0	1.0	1.0	1.0	1.0	1.0	1.0	1.0	1.0	1.0	1.0	1.0	1.0	1.0	1.0	1.0	1.0	1.0	1.0	1.0	1.0	1.0	1.0	1.0	1.0	1.0	1.0
SCGB3A1_MARCO	1.0	1.0	1.0	1.0	1.0	1.0	1.0	1.0	1.0	1.0	1.0	1.0	1.0	1.0	1.0	1.0	1.0	1.0	1.0	1.0	1.0	1.0	1.0	1.0	1.0	1.0	1.0	1.0	1.0	1.0	1.0	1.0	1.0	1.0	1.0	1.0	1.0	1.0	1.0	1.0	1.0	1.0	1.0	1.0	1.0	1.0	1.0	1.0	1.0
CCR2_CCL8	1.0	1.0	1.0	1.0	1.0	1.0	1.0	1.0	1.0	1.0	1.0	1.0	1.0	1.0	1.0	1.0	1.0	1.0	1.0	1.0	1.0	1.0	1.0	1.0	1.0	1.0	1.0	1.0	1.0	1.0	1.0	1.0	1.0	1.0	1.0	1.0	1.0	1.0	1.0	1.0	1.0	1.0	1.0	1.0	1.0	1.0	1.0	1.0	1.0
CCR1_CCL8	1.0	1.0	1.0	1.0	1.0	1.0	1.0	1.0	1.0	1.0	1.0	1.0	1.0	1.0	1.0	1.0	1.0	1.0	1.0	1.0	1.0	1.0	1.0	1.0	1.0	1.0	1.0	1.0	1.0	1.0	1.0	1.0	1.0	1.0	1.0	1.0	1.0	1.0	1.0	1.0	1.0	1.0	1.0	1.0	1.0	1.0	1.0	1.0	1.0
CCR5_CCL8	1.0	1.0	1.0	1.0	1.0	1.0	1.0	1.0	1.0	1.0	1.0	1.0	1.0	1.0	1.0	1.0	1.0	1.0	1.0	1.0	1.0	1.0	1.0	1.0	1.0	1.0	1.0	1.0	1.0	1.0	1.0	1.0	1.0	1.0	1.0	1.0	1.0	1.0	1.0	1.0	1.0	1.0	1.0	1.0	1.0	1.0	1.0	1.0	1.0
CCR2_CCL13	1.0	1.0	1.0	1.0	1.0	1.0	1.0	1.0	1.0	1.0	1.0	1.0	1.0	1.0	1.0	1.0	1.0	1.0	1.0	1.0	1.0	1.0	1.0	1.0	1.0	1.0	1.0	1.0	1.0	1.0	1.0	1.0	1.0	1.0	1.0	1.0	1.0	1.0	1.0	1.0	1.0	1.0	1.0	1.0	1.0	1.0	1.0	1.0	1.0
CCR1_CCL13	1.0	1.0	1.0	1.0	1.0	1.0	1.0	1.0	1.0	1.0	1.0	1.0	1.0	1.0	1.0	1.0	1.0	1.0	1.0	1.0	1.0	1.0	1.0	1.0	1.0	1.0	1.0	1.0	1.0	1.0	1.0	1.0	1.0	1.0	1.0	1.0	1.0	1.0	1.0	1.0	1.0	1.0	1.0	1.0	1.0	1.0	1.0	1.0	1.0
CCR10_CCL28	1.0	1.0	1.0	1.0	1.0	1.0	1.0	1.0	1.0	1.0	1.0	1.0	1.0	1.0	1.0	1.0	1.0	1.0	1.0	1.0	1.0	1.0	1.0	1.0	1.0	1.0	1.0	1.0	1.0	1.0	1.0	1.0	1.0	1.0	1.0	1.0	1.0	1.0	1.0	1.0	1.0	1.0	1.0	1.0	1.0	1.0	1.0	1.0	1.0
CCR2_CCL26	1.0	1.0	1.0	1.0	1.0	1.0	1.0	1.0	1.0	1.0	1.0	1.0	1.0	1.0	1.0	1.0	1.0	1.0	1.0	1.0	1.0	1.0	1.0	1.0	1.0	1.0	1.0	1.0	1.0	1.0	1.0	1.0	1.0	1.0	1.0	1.0	1.0	1.0	1.0	1.0	1.0	1.0	1.0	1.0	1.0	1.0	1.0	1.0	1.0
CCR1_CCL26	1.0	1.0	1.0	1.0	1.0	1.0	1.0	1.0	1.0	1.0	1.0	1.0	1.0	1.0	1.0	1.0	1.0	1.0	1.0	1.0	1.0	1.0	1.0	1.0	1.0	1.0	1.0	1.0	1.0	1.0	1.0	1.0	1.0	1.0	1.0	1.0	1.0	1.0	1.0	1.0	1.0	1.0	1.0	1.0	1.0	1.0	1.0	1.0	1.0
CCR1_CCL23	1.0	1.0	1.0	1.0	1.0	1.0	1.0	1.0	1.0	1.0	1.0	1.0	1.0	1.0	1.0	1.0	1.0	1.0	1.0	1.0	1.0	1.0	1.0	1.0	1.0	1.0	1.0	1.0	1.0	1.0	1.0	1.0	1.0	1.0	1.0	1.0	1.0	1.0	1.0	1.0	1.0	1.0	1.0	1.0	1.0	1.0	1.0	1.0	1.0
IDE_CCL23	1.0	1.0	1.0	1.0	1.0	1.0	1.0	1.0	1.0	1.0	1.0	1.0	1.0	1.0	1.0	1.0	1.0	1.0	1.0	1.0	1.0	1.0	1.0	1.0	1.0	1.0	1.0	1.0	1.0	1.0	1.0	1.0	1.0	1.0	1.0	1.0	1.0	1.0	1.0	1.0	1.0	1.0	1.0	1.0	1.0	1.0	1.0	1.0	1.0
PODXL_SELL	1.0	1.0	1.0	1.0	1.0	1.0	1.0	1.0	1.0	1.0	1.0	1.0	1.0	1.0	1.0	1.0	1.0	1.0	1.0	1.0	1.0	1.0	1.0	1.0	1.0	1.0	1.0	1.0	1.0	1.0	1.0	1.0	1.0	1.0	1.0	1.0	1.0	1.0	1.0	1.0	1.0	1.0	1.0	1.0	1.0	1.0	1.0	1.0	1.0
CXCL12_CXCR4	1.0	1.0	1.0	1.0	1.0	1.0	1.0	1.0	1.0	1.0	1.0	1.0	1.0	1.0	1.0	1.0	1.0	1.0	1.0	1.0	1.0	1.0	1.0	1.0	1.0	1.0	1.0	1.0	1.0	1.0	1.0	1.0	1.0	1.0	1.0	1.0	1.0	1.0	1.0	1.0	1.0	1.0	1.0	1.0	1.0	1.0	1.0	1.0	1.0
AVP_OXTR	1.0	1.0	1.0	1.0	1.0	1.0	1.0	1.0	1.0	1.0	1.0	1.0	1.0	1.0	1.0	1.0	1.0	1.0	1.0	1.0	1.0	1.0	1.0	1.0	1.0	1.0	1.0	1.0	1.0	1.0	1.0	1.0	1.0	1.0	1.0	1.0	1.0	1.0	1.0	1.0	1.0	1.0	1.0	1.0	1.0	1.0	1.0	1.0	1.0
OXT_OXTR	1.0	1.0	1.0	1.0	1.0	1.0	1.0	1.0	1.0	1.0	1.0	1.0	1.0	1.0	1.0	1.0	1.0	1.0	1.0	1.0	1.0	1.0	1.0	1.0	1.0	1.0	1.0	1.0	1.0	1.0	1.0	1.0	1.0	1.0	1.0	1.0	1.0	1.0	1.0	1.0	1.0	1.0	1.0	1.0	1.0	1.0	1.0	1.0	1.0
EREG_EGFR	1.0	1.0	1.0	1.0	1.0	1.0	1.0	1.0	1.0	1.0	1.0	1.0	1.0	1.0	1.0	1.0	1.0	1.0	1.0	1.0	1.0	1.0	1.0	1.0	1.0	1.0	1.0	1.0	1.0	1.0	1.0	1.0	1.0	1.0	1.0	1.0	1.0	1.0	1.0	1.0	1.0	1.0	1.0	1.0	1.0	1.0	1.0	1.0	1.0
NRG1_LSR	1.0	1.0	1.0	1.0	1.0	1.0	1.0	1.0	1.0	1.0	1.0	1.0	1.0	1.0	1.0	1.0	1.0	1.0	1.0	1.0	1.0	1.0	1.0	1.0	1.0	1.0	1.0	1.0	1.0	1.0	1.0	1.0	1.0	1.0	1.0	1.0	1.0	1.0	1.0	1.0	1.0	1.0	1.0	1.0	1.0	1.0	1.0	1.0	1.0
NRG1_NETO2	1.0	1.0	1.0	1.0	1.0	1.0	1.0	1.0	1.0	1.0	1.0	1.0	1.0	1.0	1.0	1.0	1.0	1.0	1.0	1.0	1.0	1.0	1.0	1.0	1.0	1.0	1.0	1.0	1.0	1.0	1.0	1.0	1.0	1.0	1.0	1.0	1.0	1.0	1.0	1.0	1.0	1.0	1.0	1.0	1.0	1.0	1.0	1.0	1.0
NRG1_MS4A4A	1.0	1.0	1.0	1.0	1.0	1.0	1.0	1.0	1.0	1.0	1.0	1.0	1.0	1.0	1.0	1.0	1.0	1.0	1.0	1.0	1.0	1.0	1.0	1.0	1.0	1.0	1.0	1.0	1.0	1.0	1.0	1.0	1.0	1.0	1.0	1.0	1.0	1.0	1.0	1.0	1.0	1.0	1.0	1.0	1.0	1.0	1.0	1.0	1.0
NRG1_LGR4	1.0	1.0	1.0	1.0	1.0	1.0	1.0	1.0	1.0	1.0	1.0	1.0	1.0	1.0	1.0	1.0	1.0	1.0	1.0	1.0	1.0	1.0	1.0	1.0	1.0	1.0	1.0	1.0	1.0	1.0	1.0	1.0	1.0	1.0	1.0	1.0	1.0	1.0	1.0	1.0	1.0	1.0	1.0	1.0	1.0	1.0	1.0	1.0	1.0
RSPO1_LGR4	1.0	1.0	1.0	1.0	1.0	1.0	1.0	1.0	1.0	1.0	1.0	1.0	1.0	1.0	1.0	1.0	1.0	1.0	1.0	1.0	1.0	1.0	1.0	1.0	1.0	1.0	1.0	1.0	1.0	1.0	1.0	1.0	1.0	1.0	1.0	1.0	1.0	1.0	1.0	1.0	1.0	1.0	1.0	1.0	1.0	1.0	1.0	1.0	1.0
RSPO1_LGR6	1.0	1.0	1.0	1.0	1.0	1.0	1.0	1.0	1.0	1.0	1.0	1.0	1.0	1.0	1.0	1.0	1.0	1.0	1.0	1.0	1.0	1.0	1.0	1.0	1.0	1.0	1.0	1.0	1.0	1.0	1.0	1.0	1.0	1.0	1.0	1.0	1.0	1.0	1.0	1.0	1.0	1.0	1.0	1.0	1.0	1.0	1.0	1.0	1.0
RSPO3_LGR6	1.0	1.0	1.0	1.0	1.0	1.0	1.0	1.0	1.0	1.0	1.0	1.0	1.0	1.0	1.0	1.0	1.0	1.0	1.0	1.0	1.0	1.0	1.0	1.0	1.0	1.0	1.0	1.0	1.0	1.0	1.0	1.0	1.0	1.0	1.0	1.0	1.0	1.0	1.0	1.0	1.0	1.0	1.0	1.0	1.0	1.0	1.0	1.0	1.0
TNFSF11_TNFRSF11A	1.0	1.0	1.0	1.0	1.0	1.0	1.0	1.0	1.0	1.0	1.0	1.0	1.0	1.0	1.0	1.0	1.0	1.0	1.0	1.0	1.0	1.0	1.0	1.0	1.0	1.0	1.0	1.0	1.0	1.0	1.0	1.0	1.0	1.0	1.0	1.0	1.0	1.0	1.0	1.0	1.0	1.0	1.0	1.0	1.0	1.0	1.0	1.0	1.0
NCR3_BAG6	1.0	1.0	1.0	1.0	1.0	1.0	1.0	1.0	1.0	1.0	1.0	1.0	1.0	1.0	1.0	1.0	1.0	1.0	1.0	1.0	1.0	1.0	1.0	1.0	1.0	1.0	1.0	1.0	1.0	1.0	1.0	1.0	1.0	1.0	1.0	1.0	1.0	1.0	1.0	1.0	1.0	1.0	1.0	1.0	1.0	1.0	1.0	1.0	1.0
NCR3_NCR3LG1	1.0	1.0	1.0	1.0	1.0	1.0	1.0	1.0	1.0	1.0	1.0	1.0	1.0	1.0	1.0	1.0	1.0	1.0	1.0	1.0	1.0	1.0	1.0	1.0	1.0	1.0	1.0	1.0	1.0	1.0	1.0	1.0	1.0	1.0	1.0	1.0	1.0	1.0	1.0	1.0	1.0	1.0	1.0	1.0	1.0	1.0	1.0	1.0	1.0
PLD2_ARF1	1.0	1.0	1.0	1.0	1.0	1.0	1.0	1.0	1.0	1.0	1.0	1.0	1.0	1.0	1.0	1.0	1.0	1.0	1.0	1.0	1.0	1.0	1.0	1.0	1.0	1.0	1.0	1.0	1.0	1.0	1.0	1.0	1.0	1.0	1.0	1.0	1.0	1.0	1.0	1.0	1.0	1.0	1.0	1.0	1.0	1.0	1.0	1.0	1.0
SEMA4A_PLXND1	1.0	1.0	1.0	1.0	1.0	1.0	1.0	1.0	1.0	1.0	1.0	1.0	1.0	1.0	1.0	1.0	1.0	1.0	1.0	1.0	1.0	1.0	1.0	1.0	1.0	1.0	1.0	1.0	1.0	1.0	1.0	1.0	1.0	1.0	1.0	1.0	1.0	1.0	1.0	1.0	1.0	1.0	1.0	1.0	1.0	1.0	1.0	1.0	1.0
EPHB6_EFNB1	1.0	1.0	1.0	1.0	1.0	1.0	1.0	1.0	1.0	1.0	1.0	1.0	1.0	1.0	1.0	1.0	1.0	1.0	1.0	1.0	1.0	1.0	1.0	1.0	1.0	1.0	1.0	1.0	1.0	1.0	1.0	1.0	1.0	1.0	1.0	1.0	1.0	1.0	1.0	1.0	1.0	1.0	1.0	1.0	1.0	1.0	1.0	1.0	1.0
EPHB2_EFNB1	1.0	1.0	1.0	1.0	1.0	1.0	1.0	1.0	1.0	1.0	1.0	1.0	1.0	1.0	1.0	1.0	1.0	1.0	1.0	1.0	1.0	1.0	1.0	1.0	1.0	1.0	1.0	1.0	1.0	1.0	1.0	1.0	1.0	1.0	1.0	1.0	1.0	1.0	1.0	1.0	1.0	1.0	1.0	1.0	1.0	1.0	1.0	1.0	1.0
EPHB3_EFNB1	1.0	1.0	1.0	1.0	1.0	1.0	1.0	1.0	1.0	1.0	1.0	1.0	1.0	1.0	1.0	1.0	1.0	1.0	1.0	1.0	1.0	1.0	1.0	1.0	1.0	1.0	1.0	1.0	1.0	1.0	1.0	1.0	1.0	1.0	1.0	1.0	1.0	1.0	1.0	1.0	1.0	1.0	1.0	1.0	1.0	1.0	1.0	1.0	1.0
EPHB4_EFNB1	1.0	1.0	1.0	1.0	1.0	1.0	1.0	1.0	1.0	1.0	1.0	1.0	1.0	1.0	1.0	1.0	1.0	1.0	1.0	1.0	1.0	1.0	1.0	1.0	1.0	1.0	1.0	1.0	1.0	1.0	1.0	1.0	1.0	1.0	1.0	1.0	1.0	1.0	1.0	1.0	1.0	1.0	1.0	1.0	1.0	1.0	1.0	1.0	1.0
EPHB1_EFNB1	1.0	1.0	1.0	1.0	1.0	1.0	1.0	1.0	1.0	1.0	1.0	1.0	1.0	1.0	1.0	1.0	1.0	1.0	1.0	1.0	1.0	1.0	1.0	1.0	1.0	1.0	1.0	1.0	1.0	1.0	1.0	1.0	1.0	1.0	1.0	1.0	1.0	1.0	1.0	1.0	1.0	1.0	1.0	1.0	1.0	1.0	1.0	1.0	1.0
EPHA4_EFNB1	1.0	1.0	1.0	1.0	1.0	1.0	1.0	1.0	1.0	1.0	1.0	1.0	1.0	1.0	1.0	1.0	1.0	1.0	1.0	1.0	1.0	1.0	1.0	1.0	1.0	1.0	1.0	1.0	1.0	1.0	1.0	1.0	1.0	1.0	1.0	1.0	1.0	1.0	1.0	1.0	1.0	1.0	1.0	1.0	1.0	1.0	1.0	1.0	1.0
EPHB6_EFNB3	1.0	1.0	1.0	1.0	1.0	1.0	1.0	1.0	1.0	1.0	1.0	1.0	1.0	1.0	1.0	1.0	1.0	1.0	1.0	1.0	1.0	1.0	1.0	1.0	1.0	1.0	1.0	1.0	1.0	1.0	1.0	1.0	1.0	1.0	1.0	1.0	1.0	1.0	1.0	1.0	1.0	1.0	1.0	1.0	1.0	1.0	1.0	1.0	1.0
EPHB2_EFNB3	1.0	1.0	1.0	1.0	1.0	1.0	1.0	1.0	1.0	1.0	1.0	1.0	1.0	1.0	1.0	1.0	1.0	1.0	1.0	1.0	1.0	1.0	1.0	1.0	1.0	1.0	1.0	1.0	1.0	1.0	1.0	1.0	1.0	1.0	1.0	1.0	1.0	1.0	1.0	1.0	1.0	1.0	1.0	1.0	1.0	1.0	1.0	1.0	1.0
EPHB3_EFNB3	1.0	1.0	1.0	1.0	1.0	1.0	1.0	1.0	1.0	1.0	1.0	1.0	1.0	1.0	1.0	1.0	1.0	1.0	1.0	1.0	1.0	1.0	1.0	1.0	1.0	1.0	1.0	1.0	1.0	1.0	1.0	1.0	1.0	1.0	1.0	1.0	1.0	1.0	1.0	1.0	1.0	1.0	1.0	1.0	1.0	1.0	1.0	1.0	1.0
EPHB4_EFNB3	1.0	1.0	1.0	1.0	1.0	1.0	1.0	1.0	1.0	1.0	1.0	1.0	1.0	1.0	1.0	1.0	1.0	1.0	1.0	1.0	1.0	1.0	1.0	1.0	1.0	1.0	1.0	1.0	1.0	1.0	1.0	1.0	1.0	1.0	1.0	1.0	1.0	1.0	1.0	1.0	1.0	1.0	1.0	1.0	1.0	1.0	1.0	1.0	1.0
EPHB1_EFNB3	1.0	1.0	1.0	1.0	1.0	1.0	1.0	1.0	1.0	1.0	1.0	1.0	1.0	1.0	1.0	1.0	1.0	1.0	1.0	1.0	1.0	1.0	1.0	1.0	1.0	1.0	1.0	1.0	1.0	1.0	1.0	1.0	1.0	1.0	1.0	1.0	1.0	1.0	1.0	1.0	1.0	1.0	1.0	1.0	1.0	1.0	1.0	1.0	1.0
EPHA4_EFNB3	1.0	1.0	1.0	1.0	1.0	1.0	1.0	1.0	1.0	1.0	1.0	1.0	1.0	1.0	1.0	1.0	1.0	1.0	1.0	1.0	1.0	1.0	1.0	1.0	1.0	1.0	1.0	1.0	1.0	1.0	1.0	1.0	1.0	1.0	1.0	1.0	1.0	1.0	1.0	1.0	1.0	1.0	1.0	1.0	1.0	1.0	1.0	1.0	1.0
EPHB2_EFNA5	1.0	1.0	1.0	1.0	1.0	1.0	1.0	1.0	1.0	1.0	1.0	1.0	1.0	1.0	1.0	1.0	1.0	1.0	1.0	1.0	1.0	1.0	1.0	1.0	1.0	1.0	1.0	1.0	1.0	1.0	1.0	1.0	1.0	1.0	1.0	1.0	1.0	1.0	1.0	1.0	1.0	1.0	1.0	1.0	1.0	1.0	1.0	1.0	1.0
EPHA1_EFNA5	1.0	1.0	1.0	1.0	1.0	1.0	1.0	1.0	1.0	1.0	1.0	1.0	1.0	1.0	1.0	1.0	1.0	1.0	1.0	1.0	1.0	1.0	1.0	1.0	1.0	1.0	1.0	1.0	1.0	1.0	1.0	1.0	1.0	1.0	1.0	1.0	1.0	1.0	1.0	1.0	1.0	1.0	1.0	1.0	1.0	1.0	1.0	1.0	1.0
EPHA2_EFNA5	1.0	1.0	1.0	1.0	1.0	1.0	1.0	1.0	1.0	1.0	1.0	1.0	1.0	1.0	1.0	1.0	1.0	1.0	1.0	1.0	1.0	1.0	1.0	1.0	1.0	1.0	1.0	1.0	1.0	1.0	1.0	1.0	1.0	1.0	1.0	1.0	1.0	1.0	1.0	1.0	1.0	1.0	1.0	1.0	1.0	1.0	1.0	1.0	1.0
EPHA1_EFNA3	1.0	1.0	1.0	1.0	1.0	1.0	1.0	1.0	1.0	1.0	1.0	1.0	1.0	1.0	1.0	1.0	1.0	1.0	1.0	1.0	1.0	1.0	1.0	1.0	1.0	1.0	1.0	1.0	1.0	1.0	1.0	1.0	1.0	1.0	1.0	1.0	1.0	1.0	1.0	1.0	1.0	1.0	1.0	1.0	1.0	1.0	1.0	1.0	1.0
EPHA2_EFNA3	1.0	1.0	1.0	1.0	1.0	1.0	1.0	1.0	1.0	1.0	1.0	1.0	1.0	1.0	1.0	1.0	1.0	1.0	1.0	1.0	1.0	1.0	1.0	1.0	1.0	1.0	1.0	1.0	1.0	1.0	1.0	1.0	1.0	1.0	1.0	1.0	1.0	1.0	1.0	1.0	1.0	1.0	1.0	1.0	1.0	1.0	1.0	1.0	1.0
EPHA1_EFNA4	1.0	1.0	1.0	1.0	1.0	1.0	1.0	1.0	1.0	1.0	1.0	1.0	1.0	1.0	1.0	1.0	1.0	1.0	1.0	1.0	1.0	1.0	1.0	1.0	1.0	1.0	1.0	1.0	1.0	1.0	1.0	1.0	1.0	1.0	1.0	1.0	1.0	1.0	1.0	1.0	1.0	1.0	1.0	1.0	1.0	1.0	1.0	1.0	1.0
EPHA2_EFNA4	1.0	1.0	1.0	1.0	1.0	1.0	1.0	1.0	1.0	1.0	1.0	1.0	1.0	1.0	1.0	1.0	1.0	1.0	1.0	1.0	1.0	1.0	1.0	1.0	1.0	1.0	1.0	1.0	1.0	1.0	1.0	1.0	1.0	1.0	1.0	1.0	1.0	1.0	1.0	1.0	1.0	1.0	1.0	1.0	1.0	1.0	1.0	1.0	1.0
CSF1_SIRPA	1.0	1.0	1.0	1.0	1.0	1.0	1.0	1.0	1.0	1.0	1.0	1.0	1.0	1.0	1.0	1.0	1.0	1.0	1.0	1.0	1.0	1.0	1.0	1.0	1.0	1.0	1.0	1.0	1.0	1.0	1.0	1.0	1.0	1.0	1.0	1.0	1.0	1.0	1.0	1.0	1.0	1.0	1.0	1.0	1.0	1.0	1.0	1.0	1.0
CSF1_CELSR3	1.0	1.0	1.0	1.0	1.0	1.0	1.0	1.0	1.0	1.0	1.0	1.0	1.0	1.0	1.0	1.0	1.0	1.0	1.0	1.0	1.0	1.0	1.0	1.0	1.0	1.0	1.0	1.0	1.0	1.0	1.0	1.0	1.0	1.0	1.0	1.0	1.0	1.0	1.0	1.0	1.0	1.0	1.0	1.0	1.0	1.0	1.0	1.0	1.0
CEACAM1_CD209	1.0	1.0	1.0	1.0	1.0	1.0	1.0	1.0	1.0	1.0	1.0	1.0	1.0	1.0	1.0	1.0	1.0	1.0	1.0	1.0	1.0	1.0	1.0	1.0	1.0	1.0	1.0	1.0	1.0	1.0	1.0	1.0	1.0	1.0	1.0	1.0	1.0	1.0	1.0	1.0	1.0	1.0	1.0	1.0	1.0	1.0	1.0	1.0	1.0
ICAM3_CD209	1.0	1.0	1.0	1.0	1.0	1.0	1.0	1.0	1.0	1.0	1.0	1.0	1.0	1.0	1.0	1.0	1.0	1.0	1.0	1.0	1.0	1.0	1.0	1.0	1.0	1.0	1.0	1.0	1.0	1.0	1.0	1.0	1.0	1.0	1.0	1.0	1.0	1.0	1.0	1.0	1.0	1.0	1.0	1.0	1.0	1.0	1.0	1.0	1.0
CEACAM1_CEACAM6	1.0	1.0	1.0	1.0	1.0	1.0	1.0	1.0	1.0	1.0	1.0	1.0	1.0	1.0	1.0	1.0	1.0	1.0	1.0	1.0	1.0	1.0	1.0	1.0	1.0	1.0	1.0	1.0	1.0	1.0	1.0	1.0	1.0	1.0	1.0	1.0	1.0	1.0	1.0	1.0	1.0	1.0	1.0	1.0	1.0	1.0	1.0	1.0	1.0
CEACAM8_CEACAM6	1.0	1.0	1.0	1.0	1.0	1.0	1.0	1.0	1.0	1.0	1.0	1.0	1.0	1.0	1.0	1.0	1.0	1.0	1.0	1.0	1.0	1.0	1.0	1.0	1.0	1.0	1.0	1.0	1.0	1.0	1.0	1.0	1.0	1.0	1.0	1.0	1.0	1.0	1.0	1.0	1.0	1.0	1.0	1.0	1.0	1.0	1.0	1.0	1.0
CEACAM6_CEACAM6	1.0	1.0	1.0	1.0	1.0	1.0	1.0	1.0	1.0	1.0	1.0	1.0	1.0	1.0	1.0	1.0	1.0	1.0	1.0	1.0	1.0	1.0	1.0	1.0	1.0	1.0	1.0	1.0	1.0	1.0	1.0	1.0	1.0	1.0	1.0	1.0	1.0	1.0	1.0	1.0	1.0	1.0	1.0	1.0	1.0	1.0	1.0	1.0	1.0
CEACAM1_CEACAM8	1.0	1.0	1.0	1.0	1.0	1.0	1.0	1.0	1.0	1.0	1.0	1.0	1.0	1.0	1.0	1.0	1.0	1.0	1.0	1.0	1.0	1.0	1.0	1.0	1.0	1.0	1.0	1.0	1.0	1.0	1.0	1.0	1.0	1.0	1.0	1.0	1.0	1.0	1.0	1.0	1.0	1.0	1.0	1.0	1.0	1.0	1.0	1.0	1.0
TBXA2R_GHRL	1.0	1.0	1.0	1.0	1.0	1.0	1.0	1.0	1.0	1.0	1.0	1.0	1.0	1.0	1.0	1.0	1.0	1.0	1.0	1.0	1.0	1.0	1.0	1.0	1.0	1.0	1.0	1.0	1.0	1.0	1.0	1.0	1.0	1.0	1.0	1.0	1.0	1.0	1.0	1.0	1.0	1.0	1.0	1.0	1.0	1.0	1.0	1.0	1.0
PTGIR_GHRL	1.0	1.0	1.0	1.0	1.0	1.0	1.0	1.0	1.0	1.0	1.0	1.0	1.0	1.0	1.0	1.0	1.0	1.0	1.0	1.0	1.0	1.0	1.0	1.0	1.0	1.0	1.0	1.0	1.0	1.0	1.0	1.0	1.0	1.0	1.0	1.0	1.0	1.0	1.0	1.0	1.0	1.0	1.0	1.0	1.0	1.0	1.0	1.0	1.0
TNFSF12_TNFRSF25	1.0	1.0	1.0	1.0	1.0	1.0	1.0	1.0	1.0	1.0	1.0	1.0	1.0	1.0	1.0	1.0	1.0	1.0	1.0	1.0	1.0	1.0	1.0	1.0	1.0	1.0	1.0	1.0	1.0	1.0	1.0	1.0	1.0	1.0	1.0	1.0	1.0	1.0	1.0	1.0	1.0	1.0	1.0	1.0	1.0	1.0	1.0	1.0	1.0
TNFSF12_TNFRSF12A	1.0	1.0	1.0	1.0	1.0	1.0	1.0	1.0	1.0	1.0	1.0	1.0	1.0	1.0	1.0	1.0	1.0	1.0	1.0	1.0	1.0	1.0	1.0	1.0	1.0	1.0	1.0	1.0	1.0	1.0	1.0	1.0	1.0	1.0	1.0	1.0	1.0	1.0	1.0	1.0	1.0	1.0	1.0	1.0	1.0	1.0	1.0	1.0	1.0
CD70_GPRC5B	1.0	1.0	1.0	1.0	1.0	1.0	1.0	1.0	1.0	1.0	1.0	1.0	1.0	1.0	1.0	1.0	1.0	1.0	1.0	1.0	1.0	1.0	1.0	1.0	1.0	1.0	1.0	1.0	1.0	1.0	1.0	1.0	1.0	1.0	1.0	1.0	1.0	1.0	1.0	1.0	1.0	1.0	1.0	1.0	1.0	1.0	1.0	1.0	1.0
HCRT_HCRTR2	1.0	1.0	1.0	1.0	1.0	1.0	1.0	1.0	1.0	1.0	1.0	1.0	1.0	1.0	1.0	1.0	1.0	1.0	1.0	1.0	1.0	1.0	1.0	1.0	1.0	1.0	1.0	1.0	1.0	1.0	1.0	1.0	1.0	1.0	1.0	1.0	1.0	1.0	1.0	1.0	1.0	1.0	1.0	1.0	1.0	1.0	1.0	1.0	1.0
VEGFA_FLT1	1.0	1.0	1.0	1.0	1.0	1.0	1.0	1.0	1.0	1.0	1.0	1.0	1.0	1.0	1.0	1.0	1.0	1.0	1.0	1.0	1.0	1.0	1.0	1.0	1.0	1.0	1.0	1.0	1.0	1.0	1.0	1.0	1.0	1.0	1.0	1.0	1.0	1.0	1.0	1.0	1.0	1.0	1.0	1.0	1.0	1.0	1.0	1.0	1.0
VEGFA_EPHB2	1.0	1.0	1.0	1.0	1.0	1.0	1.0	1.0	1.0	1.0	1.0	1.0	1.0	1.0	1.0	1.0	1.0	1.0	1.0	1.0	1.0	1.0	1.0	1.0	1.0	1.0	1.0	1.0	1.0	1.0	1.0	1.0	1.0	1.0	1.0	1.0	1.0	1.0	1.0	1.0	1.0	1.0	1.0	1.0	1.0	1.0	1.0	1.0	1.0
FZD6_WNT5A	1.0	1.0	1.0	1.0	1.0	1.0	1.0	1.0	1.0	1.0	1.0	1.0	1.0	1.0	1.0	1.0	1.0	1.0	1.0	1.0	1.0	1.0	1.0	1.0	1.0	1.0	1.0	1.0	1.0	1.0	1.0	1.0	1.0	1.0	1.0	1.0	1.0	1.0	1.0	1.0	1.0	1.0	1.0	1.0	1.0	1.0	1.0	1.0	1.0
PLXNC1_SEMA7A	1.0	1.0	1.0	1.0	1.0	1.0	1.0	1.0	1.0	1.0	1.0	1.0	1.0	1.0	1.0	1.0	1.0	1.0	1.0	1.0	1.0	1.0	1.0	1.0	1.0	1.0	1.0	1.0	1.0	1.0	1.0	1.0	1.0	1.0	1.0	1.0	1.0	1.0	1.0	1.0	1.0	1.0	1.0	1.0	1.0	1.0	1.0	1.0	1.0
LGR4_RSPO3	1.0	1.0	1.0	1.0	1.0	1.0	1.0	1.0	1.0	1.0	1.0	1.0	1.0	1.0	1.0	1.0	1.0	1.0	1.0	1.0	1.0	1.0	1.0	1.0	1.0	1.0	1.0	1.0	1.0	1.0	1.0	1.0	1.0	1.0	1.0	1.0	1.0	1.0	1.0	1.0	1.0	1.0	1.0	1.0	1.0	1.0	1.0	1.0	1.0
LRP6_CKLF	1.0	1.0	1.0	1.0	1.0	1.0	1.0	1.0	1.0	1.0	1.0	1.0	1.0	1.0	1.0	1.0	1.0	1.0	1.0	1.0	1.0	1.0	1.0	1.0	1.0	1.0	1.0	1.0	1.0	1.0	1.0	1.0	1.0	1.0	1.0	1.0	1.0	1.0	1.0	1.0	1.0	1.0	1.0	1.0	1.0	1.0	1.0	1.0	1.0
COPA_P2RY6	1.0	1.0	1.0	1.0	1.0	1.0	1.0	1.0	1.0	1.0	1.0	1.0	1.0	1.0	1.0	1.0	1.0	1.0	1.0	1.0	1.0	1.0	1.0	1.0	1.0	1.0	1.0	1.0	1.0	1.0	1.0	1.0	1.0	1.0	1.0	1.0	1.0	1.0	1.0	1.0	1.0	1.0	1.0	1.0	1.0	1.0	1.0	1.0	1.0
NAMPT_P2RY6	1.0	1.0	1.0	1.0	1.0	1.0	1.0	1.0	1.0	1.0	1.0	1.0	1.0	1.0	1.0	1.0	1.0	1.0	1.0	1.0	1.0	1.0	1.0	1.0	1.0	1.0	1.0	1.0	1.0	1.0	1.0	1.0	1.0	1.0	1.0	1.0	1.0	1.0	1.0	1.0	1.0	1.0	1.0	1.0	1.0	1.0	1.0	1.0	1.0
C3_C3AR1	1.0	1.0	1.0	1.0	1.0	1.0	1.0	1.0	1.0	1.0	1.0	1.0	1.0	1.0	1.0	1.0	1.0	1.0	1.0	1.0	1.0	1.0	1.0	1.0	1.0	1.0	1.0	1.0	1.0	1.0	1.0	1.0	1.0	1.0	1.0	1.0	1.0	1.0	1.0	1.0	1.0	1.0	1.0	1.0	1.0	1.0	1.0	1.0	1.0
ADORA2B_ENTPD1	1.0	1.0	1.0	1.0	1.0	1.0	1.0	1.0	1.0	1.0	1.0	1.0	1.0	1.0	1.0	1.0	1.0	1.0	1.0	1.0	1.0	1.0	1.0	1.0	1.0	1.0	1.0	1.0	1.0	1.0	1.0	1.0	1.0	1.0	1.0	1.0	1.0	1.0	1.0	1.0	1.0	1.0	1.0	1.0	1.0	1.0	1.0	1.0	1.0
AGT_AGTR1	1.0	1.0	1.0	1.0	1.0	1.0	1.0	1.0	1.0	1.0	1.0	1.0	1.0	1.0	1.0	1.0	1.0	1.0	1.0	1.0	1.0	1.0	1.0	1.0	1.0	1.0	1.0	1.0	1.0	1.0	1.0	1.0	1.0	1.0	1.0	1.0	1.0	1.0	1.0	1.0	1.0	1.0	1.0	1.0	1.0	1.0	1.0	1.0	1.0
C5_C5AR1	1.0	1.0	1.0	1.0	1.0	1.0	1.0	1.0	1.0	1.0	1.0	1.0	1.0	1.0	1.0	1.0	1.0	1.0	1.0	1.0	1.0	1.0	1.0	1.0	1.0	1.0	1.0	1.0	1.0	1.0	1.0	1.0	1.0	1.0	1.0	1.0	1.0	1.0	1.0	1.0	1.0	1.0	1.0	1.0	1.0	1.0	1.0	1.0	1.0
C5_C5AR2	1.0	1.0	1.0	1.0	1.0	1.0	1.0	1.0	1.0	1.0	1.0	1.0	1.0	1.0	1.0	1.0	1.0	1.0	1.0	1.0	1.0	1.0	1.0	1.0	1.0	1.0	1.0	1.0	1.0	1.0	1.0	1.0	1.0	1.0	1.0	1.0	1.0	1.0	1.0	1.0	1.0	1.0	1.0	1.0	1.0	1.0	1.0	1.0	1.0
TG_ASGR1	1.0	1.0	1.0	1.0	1.0	1.0	1.0	1.0	1.0	1.0	1.0	1.0	1.0	1.0	1.0	1.0	1.0	1.0	1.0	1.0	1.0	1.0	1.0	1.0	1.0	1.0	1.0	1.0	1.0	1.0	1.0	1.0	1.0	1.0	1.0	1.0	1.0	1.0	1.0	1.0	1.0	1.0	1.0	1.0	1.0	1.0	1.0	1.0	1.0
IL1B_ADRB2	1.0	1.0	1.0	1.0	1.0	1.0	1.0	1.0	1.0	1.0	1.0	1.0	1.0	1.0	1.0	1.0	1.0	1.0	1.0	1.0	1.0	1.0	1.0	1.0	1.0	1.0	1.0	1.0	1.0	1.0	1.0	1.0	1.0	1.0	1.0	1.0	1.0	1.0	1.0	1.0	1.0	1.0	1.0	1.0	1.0	1.0	1.0	1.0	1.0
ANXA1_FPR1	1.0	1.0	1.0	1.0	1.0	1.0	1.0	1.0	1.0	1.0	1.0	1.0	1.0	1.0	1.0	1.0	1.0	1.0	1.0	1.0	1.0	1.0	1.0	1.0	1.0	1.0	1.0	1.0	1.0	1.0	1.0	1.0	1.0	1.0	1.0	1.0	1.0	1.0	1.0	1.0	1.0	1.0	1.0	1.0	1.0	1.0	1.0	1.0	1.0
ANXA1_FPR3	1.0	1.0	1.0	1.0	1.0	1.0	1.0	1.0	1.0	1.0	1.0	1.0	1.0	1.0	1.0	1.0	1.0	1.0	1.0	1.0	1.0	1.0	1.0	1.0	1.0	1.0	1.0	1.0	1.0	1.0	1.0	1.0	1.0	1.0	1.0	1.0	1.0	1.0	1.0	1.0	1.0	1.0	1.0	1.0	1.0	1.0	1.0	1.0	1.0
ANXA1_FPR2	1.0	1.0	1.0	1.0	1.0	1.0	1.0	1.0	1.0	1.0	1.0	1.0	1.0	1.0	1.0	1.0	1.0	1.0	1.0	1.0	1.0	1.0	1.0	1.0	1.0	1.0	1.0	1.0	1.0	1.0	1.0	1.0	1.0	1.0	1.0	1.0	1.0	1.0	1.0	1.0	1.0	1.0	1.0	1.0	1.0	1.0	1.0	1.0	1.0
APP_FPR2	1.0	1.0	1.0	1.0	1.0	1.0	1.0	1.0	1.0	1.0	1.0	1.0	1.0	1.0	1.0	1.0	1.0	1.0	1.0	1.0	1.0	1.0	1.0	1.0	1.0	1.0	1.0	1.0	1.0	1.0	1.0	1.0	1.0	1.0	1.0	1.0	1.0	1.0	1.0	1.0	1.0	1.0	1.0	1.0	1.0	1.0	1.0	1.0	1.0
TNFSF9_ADGRG5	1.0	1.0	1.0	1.0	1.0	1.0	1.0	1.0	1.0	1.0	1.0	1.0	1.0	1.0	1.0	1.0	1.0	1.0	1.0	1.0	1.0	1.0	1.0	1.0	1.0	1.0	1.0	1.0	1.0	1.0	1.0	1.0	1.0	1.0	1.0	1.0	1.0	1.0	1.0	1.0	1.0	1.0	1.0	1.0	1.0	1.0	1.0	1.0	1.0
CD2_CD58	1.0	1.0	1.0	1.0	1.0	1.0	1.0	1.0	1.0	1.0	1.0	1.0	1.0	1.0	1.0	1.0	1.0	1.0	1.0	1.0	1.0	1.0	1.0	1.0	1.0	1.0	1.0	1.0	1.0	1.0	1.0	1.0	1.0	1.0	1.0	1.0	1.0	1.0	1.0	1.0	1.0	1.0	1.0	1.0	1.0	1.0	1.0	1.0	1.0
PROS1_AXL	1.0	1.0	1.0	1.0	1.0	1.0	1.0	1.0	1.0	1.0	1.0	1.0	1.0	1.0	1.0	1.0	1.0	1.0	1.0	1.0	1.0	1.0	1.0	1.0	1.0	1.0	1.0	1.0	1.0	1.0	1.0	1.0	1.0	1.0	1.0	1.0	1.0	1.0	1.0	1.0	1.0	1.0	1.0	1.0	1.0	1.0	1.0	1.0	1.0
PROS1_TYRO3	1.0	1.0	1.0	1.0	1.0	1.0	1.0	1.0	1.0	1.0	1.0	1.0	1.0	1.0	1.0	1.0	1.0	1.0	1.0	1.0	1.0	1.0	1.0	1.0	1.0	1.0	1.0	1.0	1.0	1.0	1.0	1.0	1.0	1.0	1.0	1.0	1.0	1.0	1.0	1.0	1.0	1.0	1.0	1.0	1.0	1.0	1.0	1.0	1.0
CSF1R_CSF1	1.0	1.0	1.0	1.0	1.0	1.0	1.0	1.0	1.0	1.0	1.0	1.0	1.0	1.0	1.0	1.0	1.0	1.0	1.0	1.0	1.0	1.0	1.0	1.0	1.0	1.0	1.0	1.0	1.0	1.0	1.0	1.0	1.0	1.0	1.0	1.0	1.0	1.0	1.0	1.0	1.0	1.0	1.0	1.0	1.0	1.0	1.0	1.0	1.0
CSF1R_IL34	1.0	1.0	1.0	1.0	1.0	1.0	1.0	1.0	1.0	1.0	1.0	1.0	1.0	1.0	1.0	1.0	1.0	1.0	1.0	1.0	1.0	1.0	1.0	1.0	1.0	1.0	1.0	1.0	1.0	1.0	1.0	1.0	1.0	1.0	1.0	1.0	1.0	1.0	1.0	1.0	1.0	1.0	1.0	1.0	1.0	1.0	1.0	1.0	1.0
CD55_ADGRE5	1.0	1.0	1.0	1.0	1.0	1.0	1.0	1.0	1.0	1.0	1.0	1.0	1.0	1.0	1.0	1.0	1.0	0.0	0.008	1.0	0.032	1.0	1.0	1.0	0.04	1.0	1.0	1.0	0.0	1.0	1.0	1.0	1.0	1.0	1.0	0.004	0.004	1.0	1.0	1.0	0.076	1.0	1.0	1.0	1.0	1.0	1.0	1.0	1.0
PTPRC_CD22	1.0	1.0	1.0	1.0	1.0	1.0	1.0	1.0	1.0	1.0	1.0	1.0	1.0	1.0	1.0	1.0	1.0	1.0	1.0	1.0	1.0	1.0	1.0	1.0	1.0	1.0	1.0	1.0	1.0	1.0	1.0	1.0	1.0	1.0	0.0	1.0	1.0	1.0	1.0	1.0	1.0	1.0	1.0	1.0	1.0	1.0	1.0	1.0	1.0
CD48_CD244	1.0	1.0	1.0	1.0	1.0	1.0	1.0	1.0	1.0	1.0	1.0	1.0	1.0	1.0	1.0	1.0	1.0	1.0	1.0	1.0	1.0	1.0	1.0	1.0	1.0	1.0	1.0	1.0	1.0	1.0	1.0	1.0	1.0	1.0	1.0	1.0	1.0	1.0	1.0	1.0	1.0	1.0	1.0	1.0	1.0	1.0	1.0	1.0	1.0
PDGFRB_PDGFD	1.0	1.0	1.0	1.0	1.0	1.0	1.0	1.0	1.0	1.0	1.0	1.0	1.0	1.0	1.0	1.0	1.0	1.0	1.0	1.0	1.0	1.0	1.0	1.0	1.0	1.0	1.0	1.0	1.0	1.0	1.0	1.0	1.0	1.0	1.0	1.0	1.0	1.0	1.0	1.0	1.0	1.0	1.0	1.0	1.0	1.0	1.0	1.0	1.0
ALOX5_ALOX5AP	1.0	1.0	1.0	1.0	1.0	1.0	1.0	1.0	1.0	1.0	1.0	1.0	1.0	1.0	1.0	1.0	1.0	1.0	1.0	1.0	1.0	1.0	1.0	1.0	1.0	1.0	1.0	1.0	1.0	1.0	1.0	1.0	1.0	1.0	1.0	1.0	1.0	1.0	1.0	1.0	1.0	1.0	1.0	1.0	1.0	1.0	1.0	1.0	1.0
KIT_KITLG	1.0	1.0	1.0	1.0	1.0	1.0	1.0	1.0	1.0	1.0	1.0	1.0	1.0	1.0	1.0	1.0	1.0	1.0	1.0	1.0	1.0	1.0	1.0	1.0	1.0	1.0	1.0	1.0	1.0	1.0	1.0	1.0	1.0	1.0	1.0	1.0	1.0	1.0	1.0	1.0	1.0	1.0	1.0	1.0	1.0	1.0	1.0	1.0	1.0
EPOR_KITLG	1.0	1.0	1.0	1.0	1.0	1.0	1.0	1.0	1.0	1.0	1.0	1.0	1.0	1.0	1.0	1.0	1.0	1.0	1.0	1.0	1.0	1.0	1.0	1.0	1.0	1.0	1.0	1.0	1.0	1.0	1.0	1.0	1.0	1.0	1.0	1.0	1.0	1.0	1.0	1.0	1.0	1.0	1.0	1.0	1.0	1.0	1.0	1.0	1.0
HLA-E_KLRC1	1.0	1.0	1.0	1.0	1.0	1.0	1.0	1.0	1.0	1.0	1.0	1.0	1.0	1.0	1.0	1.0	1.0	0.0	1.0	1.0	1.0	1.0	1.0	1.0	1.0	1.0	1.0	1.0	1.0	1.0	1.0	1.0	1.0	1.0	1.0	1.0	1.0	1.0	1.0	1.0	1.0	1.0	1.0	1.0	1.0	1.0	1.0	1.0	1.0
HLA-E_KLRC2	1.0	1.0	1.0	1.0	1.0	1.0	1.0	1.0	1.0	1.0	1.0	1.0	1.0	1.0	1.0	1.0	1.0	1.0	1.0	1.0	1.0	1.0	1.0	1.0	1.0	1.0	1.0	1.0	1.0	1.0	1.0	1.0	1.0	1.0	1.0	1.0	1.0	1.0	1.0	1.0	1.0	1.0	1.0	1.0	1.0	1.0	1.0	1.0	1.0
SELL_CD34	1.0	0.0	1.0	1.0	1.0	1.0	1.0	0.0	1.0	1.0	0.0	1.0	1.0	1.0	1.0	1.0	1.0	1.0	1.0	1.0	1.0	1.0	1.0	1.0	1.0	1.0	1.0	1.0	1.0	1.0	1.0	1.0	1.0	1.0	1.0	1.0	1.0	1.0	1.0	1.0	1.0	1.0	1.0	1.0	1.0	1.0	1.0	1.0	1.0
SELP_CD34	1.0	1.0	1.0	1.0	1.0	1.0	1.0	1.0	1.0	1.0	1.0	1.0	1.0	1.0	1.0	1.0	1.0	1.0	1.0	1.0	1.0	1.0	1.0	1.0	1.0	1.0	1.0	1.0	1.0	1.0	1.0	1.0	1.0	1.0	1.0	1.0	1.0	1.0	1.0	1.0	1.0	1.0	1.0	1.0	1.0	1.0	1.0	1.0	1.0
SELL_SELPLG	0.0	1.0	1.0	1.0	1.0	1.0	1.0	1.0	1.0	1.0	1.0	1.0	1.0	1.0	1.0	1.0	1.0	0.0	1.0	1.0	0.0	1.0	1.0	1.0	0.0	1.0	1.0	1.0	0.0	1.0	1.0	1.0	1.0	1.0	1.0	0.0	0.0	1.0	1.0	1.0	1.0	1.0	1.0	1.0	1.0	1.0	1.0	1.0	1.0
SELP_SELPLG	1.0	1.0	1.0	1.0	1.0	1.0	1.0	1.0	1.0	1.0	1.0	1.0	1.0	1.0	1.0	1.0	1.0	1.0	1.0	1.0	1.0	1.0	1.0	1.0	1.0	1.0	1.0	1.0	1.0	1.0	1.0	1.0	1.0	1.0	1.0	1.0	1.0	1.0	1.0	1.0	1.0	1.0	1.0	1.0	1.0	1.0	1.0	1.0	1.0
SELP_CD24	1.0	1.0	1.0	1.0	1.0	1.0	1.0	1.0	1.0	1.0	1.0	1.0	1.0	1.0	1.0	1.0	1.0	1.0	1.0	1.0	1.0	1.0	1.0	1.0	1.0	1.0	1.0	1.0	1.0	1.0	1.0	1.0	1.0	1.0	1.0	1.0	1.0	1.0	1.0	1.0	1.0	1.0	1.0	1.0	1.0	1.0	1.0	1.0	1.0
NPR3_NPPC	1.0	1.0	1.0	1.0	1.0	1.0	1.0	1.0	1.0	1.0	1.0	1.0	1.0	1.0	1.0	1.0	1.0	1.0	1.0	1.0	1.0	1.0	1.0	1.0	1.0	1.0	1.0	1.0	1.0	1.0	1.0	1.0	1.0	1.0	1.0	1.0	1.0	1.0	1.0	1.0	1.0	1.0	1.0	1.0	1.0	1.0	1.0	1.0	1.0
NPR2_NPPC	1.0	1.0	1.0	1.0	1.0	1.0	1.0	1.0	1.0	1.0	1.0	1.0	1.0	1.0	1.0	1.0	1.0	1.0	1.0	1.0	1.0	1.0	1.0	1.0	1.0	1.0	1.0	1.0	1.0	1.0	1.0	1.0	1.0	1.0	1.0	1.0	1.0	1.0	1.0	1.0	1.0	1.0	1.0	1.0	1.0	1.0	1.0	1.0	1.0
SPN_SIGLEC1	1.0	1.0	1.0	1.0	1.0	1.0	1.0	1.0	1.0	1.0	1.0	1.0	1.0	1.0	1.0	1.0	1.0	1.0	1.0	1.0	1.0	1.0	1.0	1.0	1.0	1.0	1.0	1.0	1.0	1.0	1.0	1.0	1.0	1.0	1.0	1.0	1.0	1.0	1.0	1.0	1.0	1.0	1.0	1.0	1.0	1.0	1.0	1.0	1.0
PDGFRA_PDGFC	1.0	1.0	1.0	1.0	1.0	1.0	1.0	1.0	1.0	1.0	1.0	1.0	1.0	1.0	1.0	1.0	1.0	1.0	1.0	1.0	1.0	1.0	1.0	1.0	1.0	1.0	1.0	1.0	1.0	1.0	1.0	1.0	1.0	1.0	1.0	1.0	1.0	1.0	1.0	1.0	1.0	1.0	1.0	1.0	1.0	1.0	1.0	1.0	1.0
PECAM1_CD38	1.0	1.0	1.0	1.0	1.0	1.0	1.0	1.0	1.0	1.0	1.0	1.0	1.0	1.0	1.0	1.0	1.0	1.0	1.0	1.0	1.0	1.0	1.0	1.0	1.0	1.0	1.0	1.0	1.0	1.0	1.0	1.0	1.0	1.0	1.0	1.0	1.0	1.0	1.0	1.0	1.0	1.0	1.0	1.0	1.0	1.0	1.0	1.0	1.0
PECAM1_CD177	1.0	1.0	1.0	1.0	1.0	1.0	1.0	1.0	1.0	1.0	1.0	1.0	1.0	1.0	1.0	1.0	1.0	1.0	1.0	1.0	1.0	1.0	1.0	1.0	1.0	1.0	1.0	1.0	1.0	1.0	1.0	1.0	1.0	1.0	1.0	1.0	1.0	1.0	1.0	1.0	1.0	1.0	1.0	1.0	1.0	1.0	1.0	1.0	1.0
TNFSF4_TNFRSF4	1.0	1.0	1.0	1.0	1.0	1.0	1.0	1.0	1.0	1.0	1.0	1.0	1.0	1.0	1.0	1.0	1.0	1.0	1.0	1.0	1.0	1.0	1.0	1.0	1.0	1.0	1.0	1.0	1.0	1.0	1.0	1.0	1.0	1.0	1.0	1.0	1.0	1.0	1.0	1.0	1.0	1.0	1.0	1.0	1.0	1.0	1.0	1.0	1.0
FPR3_HEBP1	1.0	1.0	1.0	1.0	1.0	1.0	1.0	1.0	1.0	1.0	1.0	1.0	1.0	1.0	1.0	1.0	1.0	1.0	1.0	1.0	1.0	1.0	1.0	1.0	1.0	1.0	1.0	1.0	1.0	1.0	1.0	1.0	1.0	1.0	1.0	1.0	1.0	1.0	1.0	1.0	1.0	1.0	1.0	1.0	1.0	1.0	1.0	1.0	1.0
FPR2_CAMP	1.0	1.0	1.0	1.0	1.0	1.0	1.0	1.0	1.0	1.0	1.0	1.0	1.0	1.0	1.0	1.0	1.0	1.0	1.0	1.0	1.0	1.0	1.0	1.0	1.0	1.0	1.0	1.0	1.0	1.0	1.0	1.0	1.0	1.0	1.0	1.0	1.0	1.0	1.0	1.0	1.0	1.0	1.0	1.0	1.0	1.0	1.0	1.0	1.0
TNFRSF8_TNFSF8	1.0	1.0	1.0	1.0	1.0	1.0	1.0	1.0	1.0	1.0	1.0	1.0	1.0	1.0	1.0	1.0	1.0	1.0	1.0	1.0	1.0	1.0	1.0	1.0	1.0	1.0	1.0	1.0	1.0	1.0	1.0	1.0	1.0	1.0	1.0	1.0	1.0	1.0	1.0	1.0	1.0	1.0	1.0	1.0	1.0	1.0	1.0	1.0	1.0
CD6_ALCAM	1.0	1.0	1.0	1.0	1.0	1.0	1.0	1.0	1.0	1.0	1.0	1.0	1.0	1.0	1.0	1.0	1.0	1.0	1.0	1.0	1.0	1.0	1.0	1.0	1.0	1.0	1.0	1.0	1.0	1.0	1.0	1.0	1.0	1.0	1.0	1.0	1.0	1.0	1.0	1.0	1.0	1.0	1.0	1.0	1.0	1.0	1.0	1.0	1.0
AXL_IL15RA	1.0	1.0	1.0	1.0	1.0	1.0	1.0	1.0	1.0	1.0	1.0	1.0	1.0	1.0	1.0	1.0	1.0	1.0	1.0	1.0	1.0	1.0	1.0	1.0	1.0	1.0	1.0	1.0	1.0	1.0	1.0	1.0	1.0	1.0	1.0	1.0	1.0	1.0	1.0	1.0	1.0	1.0	1.0	1.0	1.0	1.0	1.0	1.0	1.0
IL15_IL15RA	1.0	1.0	1.0	1.0	1.0	1.0	1.0	1.0	1.0	1.0	1.0	1.0	1.0	1.0	1.0	1.0	1.0	1.0	1.0	1.0	1.0	1.0	1.0	1.0	1.0	1.0	1.0	1.0	1.0	1.0	1.0	1.0	1.0	1.0	1.0	1.0	1.0	1.0	1.0	1.0	1.0	1.0	1.0	1.0	1.0	1.0	1.0	1.0	1.0
AXL_GAS6	1.0	1.0	1.0	1.0	1.0	1.0	1.0	1.0	1.0	1.0	1.0	1.0	1.0	1.0	1.0	1.0	1.0	1.0	1.0	1.0	1.0	1.0	1.0	1.0	1.0	1.0	1.0	1.0	1.0	1.0	1.0	1.0	1.0	1.0	1.0	1.0	1.0	1.0	1.0	1.0	1.0	1.0	1.0	1.0	1.0	1.0	1.0	1.0	1.0
TYRO3_GAS6	1.0	1.0	1.0	1.0	1.0	1.0	1.0	1.0	1.0	1.0	1.0	1.0	1.0	1.0	1.0	1.0	1.0	1.0	1.0	1.0	1.0	1.0	1.0	1.0	1.0	1.0	1.0	1.0	1.0	1.0	1.0	1.0	1.0	1.0	1.0	1.0	1.0	1.0	1.0	1.0	1.0	1.0	1.0	1.0	1.0	1.0	1.0	1.0	1.0
MERTK_GAS6	1.0	1.0	1.0	1.0	1.0	1.0	1.0	1.0	1.0	1.0	1.0	1.0	1.0	1.0	1.0	1.0	1.0	1.0	1.0	1.0	1.0	1.0	1.0	1.0	1.0	1.0	1.0	1.0	1.0	1.0	1.0	1.0	1.0	1.0	1.0	1.0	1.0	1.0	1.0	1.0	1.0	1.0	1.0	1.0	1.0	1.0	1.0	1.0	1.0
CD52_SIGLEC10	1.0	1.0	1.0	1.0	1.0	1.0	1.0	1.0	1.0	1.0	1.0	1.0	1.0	1.0	1.0	1.0	1.0	1.0	1.0	1.0	1.0	1.0	1.0	1.0	1.0	1.0	1.0	1.0	0.0	1.0	1.0	1.0	1.0	1.0	1.0	1.0	1.0	1.0	1.0	1.0	1.0	1.0	1.0	1.0	1.0	1.0	1.0	1.0	1.0
BMP8B_PLAUR	1.0	1.0	1.0	1.0	1.0	1.0	1.0	1.0	1.0	1.0	1.0	1.0	1.0	1.0	1.0	1.0	1.0	1.0	1.0	1.0	1.0	1.0	1.0	1.0	1.0	1.0	1.0	1.0	1.0	1.0	1.0	1.0	1.0	1.0	1.0	1.0	1.0	1.0	1.0	1.0	1.0	1.0	1.0	1.0	1.0	1.0	1.0	1.0	1.0
FLT3_FLT3LG	1.0	1.0	1.0	1.0	1.0	1.0	1.0	1.0	1.0	1.0	1.0	1.0	1.0	1.0	1.0	1.0	1.0	1.0	1.0	1.0	1.0	1.0	1.0	1.0	1.0	1.0	1.0	1.0	1.0	1.0	1.0	1.0	1.0	1.0	1.0	1.0	1.0	1.0	1.0	1.0	1.0	1.0	1.0	1.0	1.0	1.0	1.0	1.0	1.0
CMKLR1_RARRES2	1.0	1.0	1.0	1.0	1.0	1.0	1.0	1.0	1.0	1.0	1.0	1.0	1.0	1.0	1.0	1.0	1.0	1.0	1.0	1.0	1.0	1.0	1.0	1.0	1.0	1.0	1.0	1.0	1.0	1.0	1.0	1.0	1.0	1.0	1.0	1.0	1.0	1.0	1.0	1.0	1.0	1.0	1.0	1.0	1.0	1.0	1.0	1.0	1.0
NMU_NMUR1	1.0	1.0	1.0	1.0	1.0	1.0	1.0	1.0	1.0	1.0	1.0	1.0	1.0	1.0	1.0	1.0	1.0	1.0	1.0	1.0	1.0	1.0	1.0	1.0	1.0	1.0	1.0	1.0	1.0	1.0	1.0	1.0	1.0	1.0	1.0	1.0	1.0	1.0	1.0	1.0	1.0	1.0	1.0	1.0	1.0	1.0	1.0	1.0	1.0
CX3CR1_CX3CL1	1.0	1.0	1.0	1.0	1.0	1.0	1.0	1.0	1.0	1.0	1.0	1.0	1.0	1.0	1.0	1.0	1.0	1.0	1.0	1.0	1.0	1.0	1.0	1.0	1.0	1.0	1.0	1.0	1.0	1.0	1.0	1.0	1.0	1.0	1.0	1.0	1.0	1.0	1.0	1.0	1.0	1.0	1.0	1.0	1.0	1.0	1.0	1.0	1.0
LILRA4_BST2	0.0	0.0	0.0	0.0	0.0	0.0	0.0	0.0	0.0	1.0	0.0	0.0	0.0	0.0	1.0	0.0	0.0	0.0	0.0	0.0	0.0	0.0	0.0	0.0	0.0	1.0	0.0	1.0	0.0	0.0	0.0	0.0	0.0	1.0	0.0	0.0	0.0	0.0	0.0	0.0	0.0	1.0	1.0	1.0	1.0	1.0	1.0	1.0	1.0
DSC2_DSG2	1.0	1.0	1.0	1.0	1.0	1.0	1.0	1.0	1.0	1.0	1.0	1.0	1.0	1.0	1.0	1.0	1.0	1.0	1.0	1.0	1.0	1.0	1.0	1.0	1.0	1.0	1.0	1.0	1.0	1.0	1.0	1.0	1.0	1.0	1.0	1.0	1.0	1.0	1.0	1.0	1.0	1.0	1.0	1.0	1.0	1.0	1.0	1.0	1.0
LRP1_ERFE	1.0	1.0	1.0	1.0	1.0	1.0	1.0	1.0	1.0	1.0	1.0	1.0	1.0	1.0	1.0	1.0	1.0	1.0	1.0	1.0	1.0	1.0	1.0	1.0	1.0	1.0	1.0	1.0	1.0	1.0	1.0	1.0	1.0	1.0	1.0	1.0	1.0	1.0	1.0	1.0	1.0	1.0	1.0	1.0	1.0	1.0	1.0	1.0	1.0
CD47_SIRPG	1.0	1.0	1.0	1.0	1.0	1.0	1.0	1.0	1.0	1.0	1.0	1.0	1.0	1.0	1.0	1.0	1.0	1.0	1.0	1.0	1.0	1.0	1.0	1.0	1.0	1.0	1.0	1.0	1.0	1.0	1.0	1.0	1.0	1.0	1.0	1.0	1.0	1.0	1.0	1.0	1.0	1.0	1.0	1.0	1.0	1.0	1.0	1.0	1.0
IL16_GRIN2C	1.0	1.0	1.0	1.0	1.0	1.0	1.0	1.0	1.0	1.0	1.0	1.0	1.0	1.0	1.0	1.0	1.0	1.0	1.0	1.0	1.0	1.0	1.0	1.0	1.0	1.0	1.0	1.0	1.0	1.0	1.0	1.0	1.0	1.0	1.0	1.0	1.0	1.0	1.0	1.0	1.0	1.0	1.0	1.0	1.0	1.0	1.0	1.0	1.0
GPR19_ENHO	1.0	1.0	1.0	1.0	1.0	1.0	1.0	1.0	1.0	1.0	1.0	1.0	1.0	1.0	1.0	1.0	1.0	1.0	1.0	1.0	1.0	1.0	1.0	1.0	1.0	1.0	1.0	1.0	1.0	1.0	1.0	1.0	1.0	1.0	1.0	1.0	1.0	1.0	1.0	1.0	1.0	1.0	1.0	1.0	1.0	1.0	1.0	1.0	1.0
LAIR1_LILRB4	0.0	1.0	1.0	1.0	1.0	1.0	1.0	1.0	1.0	1.0	1.0	1.0	1.0	1.0	1.0	1.0	1.0	1.0	1.0	1.0	0.0	0.0	1.0	1.0	0.0	1.0	1.0	1.0	1.0	1.0	1.0	1.0	1.0	1.0	1.0	1.0	1.0	1.0	1.0	1.0	1.0	1.0	0.0	1.0	1.0	1.0	1.0	1.0	1.0
VSTM1_ADGRG3	1.0	1.0	1.0	1.0	1.0	1.0	1.0	1.0	1.0	1.0	1.0	1.0	1.0	1.0	1.0	1.0	1.0	1.0	1.0	1.0	1.0	1.0	1.0	1.0	1.0	1.0	1.0	1.0	1.0	1.0	1.0	1.0	1.0	1.0	1.0	1.0	1.0	1.0	1.0	1.0	1.0	1.0	1.0	1.0	1.0	1.0	1.0	1.0	1.0
CLEC2B_KLRF1	1.0	1.0	1.0	1.0	1.0	1.0	1.0	1.0	1.0	1.0	1.0	1.0	1.0	1.0	1.0	1.0	1.0	1.0	1.0	1.0	1.0	1.0	1.0	1.0	1.0	1.0	1.0	1.0	1.0	1.0	1.0	1.0	1.0	1.0	1.0	1.0	1.0	1.0	1.0	1.0	1.0	1.0	1.0	1.0	1.0	1.0	1.0	1.0	1.0
ESAM_ESAM	1.0	1.0	1.0	1.0	1.0	1.0	1.0	1.0	1.0	1.0	1.0	1.0	1.0	1.0	1.0	1.0	1.0	1.0	1.0	1.0	1.0	1.0	1.0	1.0	1.0	1.0	1.0	1.0	1.0	1.0	1.0	1.0	1.0	1.0	1.0	1.0	1.0	1.0	1.0	1.0	1.0	1.0	1.0	1.0	1.0	1.0	1.0	1.0	1.0
COL6A6_a10b1 complex	1.0	1.0	1.0	1.0	1.0	1.0	1.0	1.0	1.0	1.0	1.0	1.0	1.0	1.0	1.0	1.0	1.0	1.0	1.0	1.0	1.0	1.0	1.0	1.0	1.0	1.0	1.0	1.0	1.0	1.0	1.0	1.0	1.0	1.0	1.0	1.0	1.0	1.0	1.0	1.0	1.0	1.0	1.0	1.0	1.0	1.0	1.0	1.0	1.0
COL1A1_a10b1 complex	1.0	1.0	1.0	1.0	1.0	1.0	1.0	1.0	1.0	1.0	1.0	1.0	1.0	1.0	1.0	1.0	1.0	1.0	1.0	1.0	1.0	1.0	1.0	1.0	1.0	1.0	1.0	1.0	1.0	1.0	1.0	1.0	1.0	1.0	1.0	1.0	1.0	1.0	1.0	1.0	1.0	1.0	1.0	1.0	1.0	1.0	1.0	1.0	1.0
COL3A1_a10b1 complex	1.0	1.0	1.0	1.0	1.0	1.0	1.0	1.0	1.0	1.0	1.0	1.0	1.0	1.0	1.0	1.0	1.0	1.0	1.0	1.0	1.0	1.0	1.0	1.0	1.0	1.0	1.0	1.0	1.0	1.0	1.0	1.0	1.0	1.0	1.0	1.0	1.0	1.0	1.0	1.0	1.0	1.0	1.0	1.0	1.0	1.0	1.0	1.0	1.0
COL4A1_a10b1 complex	1.0	1.0	1.0	1.0	1.0	1.0	1.0	1.0	1.0	1.0	1.0	1.0	1.0	1.0	1.0	1.0	1.0	1.0	1.0	1.0	1.0	1.0	1.0	1.0	1.0	1.0	1.0	1.0	1.0	1.0	1.0	1.0	1.0	1.0	1.0	1.0	1.0	1.0	1.0	1.0	1.0	1.0	1.0	1.0	1.0	1.0	1.0	1.0	1.0
FN1_a10b1 complex	1.0	1.0	1.0	1.0	1.0	1.0	1.0	1.0	1.0	1.0	1.0	1.0	1.0	1.0	1.0	1.0	1.0	1.0	1.0	1.0	1.0	1.0	1.0	1.0	1.0	1.0	1.0	1.0	1.0	1.0	1.0	1.0	1.0	1.0	1.0	1.0	1.0	1.0	1.0	1.0	1.0	1.0	1.0	1.0	1.0	1.0	1.0	1.0	1.0
COL5A2_a10b1 complex	1.0	1.0	1.0	1.0	1.0	1.0	1.0	1.0	1.0	1.0	1.0	1.0	1.0	1.0	1.0	1.0	1.0	1.0	1.0	1.0	1.0	1.0	1.0	1.0	1.0	1.0	1.0	1.0	1.0	1.0	1.0	1.0	1.0	1.0	1.0	1.0	1.0	1.0	1.0	1.0	1.0	1.0	1.0	1.0	1.0	1.0	1.0	1.0	1.0
COL1A2_a10b1 complex	1.0	1.0	1.0	1.0	1.0	1.0	1.0	1.0	1.0	1.0	1.0	1.0	1.0	1.0	1.0	1.0	1.0	1.0	1.0	1.0	1.0	1.0	1.0	1.0	1.0	1.0	1.0	1.0	1.0	1.0	1.0	1.0	1.0	1.0	1.0	1.0	1.0	1.0	1.0	1.0	1.0	1.0	1.0	1.0	1.0	1.0	1.0	1.0	1.0
COL4A2_a10b1 complex	1.0	1.0	1.0	1.0	1.0	1.0	1.0	1.0	1.0	1.0	1.0	1.0	1.0	1.0	1.0	1.0	1.0	1.0	1.0	1.0	1.0	1.0	1.0	1.0	1.0	1.0	1.0	1.0	1.0	1.0	1.0	1.0	1.0	1.0	1.0	1.0	1.0	1.0	1.0	1.0	1.0	1.0	1.0	1.0	1.0	1.0	1.0	1.0	1.0
COL11A1_a10b1 complex	1.0	1.0	1.0	1.0	1.0	1.0	1.0	1.0	1.0	1.0	1.0	1.0	1.0	1.0	1.0	1.0	1.0	1.0	1.0	1.0	1.0	1.0	1.0	1.0	1.0	1.0	1.0	1.0	1.0	1.0	1.0	1.0	1.0	1.0	1.0	1.0	1.0	1.0	1.0	1.0	1.0	1.0	1.0	1.0	1.0	1.0	1.0	1.0	1.0
COL6A1_a10b1 complex	1.0	1.0	1.0	1.0	1.0	1.0	1.0	1.0	1.0	1.0	1.0	1.0	1.0	1.0	1.0	1.0	1.0	1.0	1.0	1.0	1.0	1.0	1.0	1.0	1.0	1.0	1.0	1.0	1.0	1.0	1.0	1.0	1.0	1.0	1.0	1.0	1.0	1.0	1.0	1.0	1.0	1.0	1.0	1.0	1.0	1.0	1.0	1.0	1.0
COL6A2_a10b1 complex	1.0	1.0	1.0	1.0	1.0	1.0	1.0	1.0	1.0	1.0	1.0	1.0	1.0	1.0	1.0	1.0	1.0	1.0	1.0	1.0	1.0	1.0	1.0	1.0	1.0	1.0	1.0	1.0	1.0	1.0	1.0	1.0	1.0	1.0	1.0	1.0	1.0	1.0	1.0	1.0	1.0	1.0	1.0	1.0	1.0	1.0	1.0	1.0	1.0
COL6A3_a10b1 complex	1.0	1.0	1.0	1.0	1.0	1.0	1.0	1.0	1.0	1.0	1.0	1.0	1.0	1.0	1.0	1.0	1.0	1.0	1.0	1.0	1.0	1.0	1.0	1.0	1.0	1.0	1.0	1.0	1.0	1.0	1.0	1.0	1.0	1.0	1.0	1.0	1.0	1.0	1.0	1.0	1.0	1.0	1.0	1.0	1.0	1.0	1.0	1.0	1.0
COL11A2_a10b1 complex	1.0	1.0	1.0	1.0	1.0	1.0	1.0	1.0	1.0	1.0	1.0	1.0	1.0	1.0	1.0	1.0	1.0	1.0	1.0	1.0	1.0	1.0	1.0	1.0	1.0	1.0	1.0	1.0	1.0	1.0	1.0	1.0	1.0	1.0	1.0	1.0	1.0	1.0	1.0	1.0	1.0	1.0	1.0	1.0	1.0	1.0	1.0	1.0	1.0
COL5A1_a10b1 complex	1.0	1.0	1.0	1.0	1.0	1.0	1.0	1.0	1.0	1.0	1.0	1.0	1.0	1.0	1.0	1.0	1.0	1.0	1.0	1.0	1.0	1.0	1.0	1.0	1.0	1.0	1.0	1.0	1.0	1.0	1.0	1.0	1.0	1.0	1.0	1.0	1.0	1.0	1.0	1.0	1.0	1.0	1.0	1.0	1.0	1.0	1.0	1.0	1.0
COL8A2_a10b1 complex	1.0	1.0	1.0	1.0	1.0	1.0	1.0	1.0	1.0	1.0	1.0	1.0	1.0	1.0	1.0	1.0	1.0	1.0	1.0	1.0	1.0	1.0	1.0	1.0	1.0	1.0	1.0	1.0	1.0	1.0	1.0	1.0	1.0	1.0	1.0	1.0	1.0	1.0	1.0	1.0	1.0	1.0	1.0	1.0	1.0	1.0	1.0	1.0	1.0
COL5A3_a10b1 complex	1.0	1.0	1.0	1.0	1.0	1.0	1.0	1.0	1.0	1.0	1.0	1.0	1.0	1.0	1.0	1.0	1.0	1.0	1.0	1.0	1.0	1.0	1.0	1.0	1.0	1.0	1.0	1.0	1.0	1.0	1.0	1.0	1.0	1.0	1.0	1.0	1.0	1.0	1.0	1.0	1.0	1.0	1.0	1.0	1.0	1.0	1.0	1.0	1.0
COL8A1_a10b1 complex	1.0	1.0	1.0	1.0	1.0	1.0	1.0	1.0	1.0	1.0	1.0	1.0	1.0	1.0	1.0	1.0	1.0	1.0	1.0	1.0	1.0	1.0	1.0	1.0	1.0	1.0	1.0	1.0	1.0	1.0	1.0	1.0	1.0	1.0	1.0	1.0	1.0	1.0	1.0	1.0	1.0	1.0	1.0	1.0	1.0	1.0	1.0	1.0	1.0
COL15A1_a10b1 complex	1.0	1.0	1.0	1.0	1.0	1.0	1.0	1.0	1.0	1.0	1.0	1.0	1.0	1.0	1.0	1.0	1.0	1.0	1.0	1.0	1.0	1.0	1.0	1.0	1.0	1.0	1.0	1.0	1.0	1.0	1.0	1.0	1.0	1.0	1.0	1.0	1.0	1.0	1.0	1.0	1.0	1.0	1.0	1.0	1.0	1.0	1.0	1.0	1.0
COL18A1_a10b1 complex	1.0	1.0	1.0	1.0	1.0	1.0	1.0	1.0	1.0	1.0	1.0	1.0	1.0	1.0	1.0	1.0	1.0	1.0	1.0	1.0	1.0	1.0	1.0	1.0	1.0	1.0	1.0	1.0	1.0	1.0	1.0	1.0	1.0	1.0	1.0	1.0	1.0	1.0	1.0	1.0	1.0	1.0	1.0	1.0	1.0	1.0	1.0	1.0	1.0
COL4A4_a10b1 complex	1.0	1.0	1.0	1.0	1.0	1.0	1.0	1.0	1.0	1.0	1.0	1.0	1.0	1.0	1.0	1.0	1.0	1.0	1.0	1.0	1.0	1.0	1.0	1.0	1.0	1.0	1.0	1.0	1.0	1.0	1.0	1.0	1.0	1.0	1.0	1.0	1.0	1.0	1.0	1.0	1.0	1.0	1.0	1.0	1.0	1.0	1.0	1.0	1.0
COL7A1_a10b1 complex	1.0	1.0	1.0	1.0	1.0	1.0	1.0	1.0	1.0	1.0	1.0	1.0	1.0	1.0	1.0	1.0	1.0	1.0	1.0	1.0	1.0	1.0	1.0	1.0	1.0	1.0	1.0	1.0	1.0	1.0	1.0	1.0	1.0	1.0	1.0	1.0	1.0	1.0	1.0	1.0	1.0	1.0	1.0	1.0	1.0	1.0	1.0	1.0	1.0
COL10A1_a10b1 complex	1.0	1.0	1.0	1.0	1.0	1.0	1.0	1.0	1.0	1.0	1.0	1.0	1.0	1.0	1.0	1.0	1.0	1.0	1.0	1.0	1.0	1.0	1.0	1.0	1.0	1.0	1.0	1.0	1.0	1.0	1.0	1.0	1.0	1.0	1.0	1.0	1.0	1.0	1.0	1.0	1.0	1.0	1.0	1.0	1.0	1.0	1.0	1.0	1.0
COL14A1_a10b1 complex	1.0	1.0	1.0	1.0	1.0	1.0	1.0	1.0	1.0	1.0	1.0	1.0	1.0	1.0	1.0	1.0	1.0	1.0	1.0	1.0	1.0	1.0	1.0	1.0	1.0	1.0	1.0	1.0	1.0	1.0	1.0	1.0	1.0	1.0	1.0	1.0	1.0	1.0	1.0	1.0	1.0	1.0	1.0	1.0	1.0	1.0	1.0	1.0	1.0
COL16A1_a10b1 complex	1.0	1.0	1.0	1.0	1.0	1.0	1.0	1.0	1.0	1.0	1.0	1.0	1.0	1.0	1.0	1.0	1.0	1.0	1.0	1.0	1.0	1.0	1.0	1.0	1.0	1.0	1.0	1.0	1.0	1.0	1.0	1.0	1.0	1.0	1.0	1.0	1.0	1.0	1.0	1.0	1.0	1.0	1.0	1.0	1.0	1.0	1.0	1.0	1.0
COL9A3_a10b1 complex	1.0	1.0	1.0	1.0	1.0	1.0	1.0	1.0	1.0	1.0	1.0	1.0	1.0	1.0	1.0	1.0	1.0	1.0	1.0	1.0	1.0	1.0	1.0	1.0	1.0	1.0	1.0	1.0	1.0	1.0	1.0	1.0	1.0	1.0	1.0	1.0	1.0	1.0	1.0	1.0	1.0	1.0	1.0	1.0	1.0	1.0	1.0	1.0	1.0
COL9A2_a10b1 complex	1.0	1.0	1.0	1.0	1.0	1.0	1.0	1.0	1.0	1.0	1.0	1.0	1.0	1.0	1.0	1.0	1.0	1.0	1.0	1.0	1.0	1.0	1.0	1.0	1.0	1.0	1.0	1.0	1.0	1.0	1.0	1.0	1.0	1.0	1.0	1.0	1.0	1.0	1.0	1.0	1.0	1.0	1.0	1.0	1.0	1.0	1.0	1.0	1.0
COL19A1_a10b1 complex	1.0	1.0	1.0	1.0	1.0	1.0	1.0	1.0	1.0	1.0	1.0	1.0	1.0	1.0	1.0	1.0	1.0	1.0	1.0	1.0	1.0	1.0	1.0	1.0	1.0	1.0	1.0	1.0	1.0	1.0	1.0	1.0	1.0	1.0	1.0	1.0	1.0	1.0	1.0	1.0	1.0	1.0	1.0	1.0	1.0	1.0	1.0	1.0	1.0
COL24A1_a10b1 complex	1.0	1.0	1.0	1.0	1.0	1.0	1.0	1.0	1.0	1.0	1.0	1.0	1.0	1.0	1.0	1.0	1.0	1.0	1.0	1.0	1.0	1.0	1.0	1.0	1.0	1.0	1.0	1.0	1.0	1.0	1.0	1.0	1.0	1.0	1.0	1.0	1.0	1.0	1.0	1.0	1.0	1.0	1.0	1.0	1.0	1.0	1.0	1.0	1.0
COL28A1_a10b1 complex	1.0	1.0	1.0	1.0	1.0	1.0	1.0	1.0	1.0	1.0	1.0	1.0	1.0	1.0	1.0	1.0	1.0	1.0	1.0	1.0	1.0	1.0	1.0	1.0	1.0	1.0	1.0	1.0	1.0	1.0	1.0	1.0	1.0	1.0	1.0	1.0	1.0	1.0	1.0	1.0	1.0	1.0	1.0	1.0	1.0	1.0	1.0	1.0	1.0
COL13A1_a10b1 complex	1.0	1.0	1.0	1.0	1.0	1.0	1.0	1.0	1.0	1.0	1.0	1.0	1.0	1.0	1.0	1.0	1.0	1.0	1.0	1.0	1.0	1.0	1.0	1.0	1.0	1.0	1.0	1.0	1.0	1.0	1.0	1.0	1.0	1.0	1.0	1.0	1.0	1.0	1.0	1.0	1.0	1.0	1.0	1.0	1.0	1.0	1.0	1.0	1.0
COL27A1_a10b1 complex	1.0	1.0	1.0	1.0	1.0	1.0	1.0	1.0	1.0	1.0	1.0	1.0	1.0	1.0	1.0	1.0	1.0	1.0	1.0	1.0	1.0	1.0	1.0	1.0	1.0	1.0	1.0	1.0	1.0	1.0	1.0	1.0	1.0	1.0	1.0	1.0	1.0	1.0	1.0	1.0	1.0	1.0	1.0	1.0	1.0	1.0	1.0	1.0	1.0
COL26A1_a10b1 complex	1.0	1.0	1.0	1.0	1.0	1.0	1.0	1.0	1.0	1.0	1.0	1.0	1.0	1.0	1.0	1.0	1.0	1.0	1.0	1.0	1.0	1.0	1.0	1.0	1.0	1.0	1.0	1.0	1.0	1.0	1.0	1.0	1.0	1.0	1.0	1.0	1.0	1.0	1.0	1.0	1.0	1.0	1.0	1.0	1.0	1.0	1.0	1.0	1.0
COL21A1_a10b1 complex	1.0	1.0	1.0	1.0	1.0	1.0	1.0	1.0	1.0	1.0	1.0	1.0	1.0	1.0	1.0	1.0	1.0	1.0	1.0	1.0	1.0	1.0	1.0	1.0	1.0	1.0	1.0	1.0	1.0	1.0	1.0	1.0	1.0	1.0	1.0	1.0	1.0	1.0	1.0	1.0	1.0	1.0	1.0	1.0	1.0	1.0	1.0	1.0	1.0
COL12A1_a10b1 complex	1.0	1.0	1.0	1.0	1.0	1.0	1.0	1.0	1.0	1.0	1.0	1.0	1.0	1.0	1.0	1.0	1.0	1.0	1.0	1.0	1.0	1.0	1.0	1.0	1.0	1.0	1.0	1.0	1.0	1.0	1.0	1.0	1.0	1.0	1.0	1.0	1.0	1.0	1.0	1.0	1.0	1.0	1.0	1.0	1.0	1.0	1.0	1.0	1.0
COL17A1_a10b1 complex	1.0	1.0	1.0	1.0	1.0	1.0	1.0	1.0	1.0	1.0	1.0	1.0	1.0	1.0	1.0	1.0	1.0	1.0	1.0	1.0	1.0	1.0	1.0	1.0	1.0	1.0	1.0	1.0	1.0	1.0	1.0	1.0	1.0	1.0	1.0	1.0	1.0	1.0	1.0	1.0	1.0	1.0	1.0	1.0	1.0	1.0	1.0	1.0	1.0
COL6A6_a1b1 complex	1.0	1.0	1.0	1.0	1.0	1.0	1.0	1.0	1.0	1.0	1.0	1.0	1.0	1.0	1.0	1.0	1.0	1.0	1.0	1.0	1.0	1.0	1.0	1.0	1.0	1.0	1.0	1.0	1.0	1.0	1.0	1.0	1.0	1.0	1.0	1.0	1.0	1.0	1.0	1.0	1.0	1.0	1.0	1.0	1.0	1.0	1.0	1.0	1.0
COL1A1_a1b1 complex	1.0	1.0	1.0	1.0	1.0	1.0	1.0	1.0	1.0	1.0	1.0	1.0	1.0	1.0	1.0	1.0	1.0	1.0	1.0	1.0	1.0	1.0	1.0	1.0	1.0	1.0	1.0	1.0	1.0	1.0	1.0	1.0	1.0	1.0	1.0	1.0	1.0	1.0	1.0	1.0	1.0	1.0	1.0	1.0	1.0	1.0	1.0	1.0	1.0
COL3A1_a1b1 complex	1.0	1.0	1.0	1.0	1.0	1.0	1.0	1.0	1.0	1.0	1.0	1.0	1.0	1.0	1.0	1.0	1.0	1.0	1.0	1.0	1.0	1.0	1.0	1.0	1.0	1.0	1.0	1.0	1.0	1.0	1.0	1.0	1.0	1.0	1.0	1.0	1.0	1.0	1.0	1.0	1.0	1.0	1.0	1.0	1.0	1.0	1.0	1.0	1.0
COL4A1_a1b1 complex	1.0	1.0	1.0	1.0	1.0	1.0	1.0	1.0	1.0	1.0	1.0	1.0	1.0	1.0	1.0	1.0	1.0	1.0	1.0	1.0	1.0	1.0	1.0	1.0	1.0	1.0	1.0	1.0	1.0	1.0	1.0	1.0	1.0	1.0	1.0	1.0	1.0	1.0	1.0	1.0	1.0	1.0	1.0	1.0	1.0	1.0	1.0	1.0	1.0
COL5A2_a1b1 complex	1.0	1.0	1.0	1.0	1.0	1.0	1.0	1.0	1.0	1.0	1.0	1.0	1.0	1.0	1.0	1.0	1.0	1.0	1.0	1.0	1.0	1.0	1.0	1.0	1.0	1.0	1.0	1.0	1.0	1.0	1.0	1.0	1.0	1.0	1.0	1.0	1.0	1.0	1.0	1.0	1.0	1.0	1.0	1.0	1.0	1.0	1.0	1.0	1.0
COL1A2_a1b1 complex	1.0	1.0	1.0	1.0	1.0	1.0	1.0	1.0	1.0	1.0	1.0	1.0	1.0	1.0	1.0	1.0	1.0	1.0	1.0	1.0	1.0	1.0	1.0	1.0	1.0	1.0	1.0	1.0	1.0	1.0	1.0	1.0	1.0	1.0	1.0	1.0	1.0	1.0	1.0	1.0	1.0	1.0	1.0	1.0	1.0	1.0	1.0	1.0	1.0
COL4A2_a1b1 complex	1.0	1.0	1.0	1.0	1.0	1.0	1.0	1.0	1.0	1.0	1.0	1.0	1.0	1.0	1.0	1.0	1.0	1.0	1.0	1.0	1.0	1.0	1.0	1.0	1.0	1.0	1.0	1.0	1.0	1.0	1.0	1.0	1.0	1.0	1.0	1.0	1.0	1.0	1.0	1.0	1.0	1.0	1.0	1.0	1.0	1.0	1.0	1.0	1.0
COL11A1_a1b1 complex	1.0	1.0	1.0	1.0	1.0	1.0	1.0	1.0	1.0	1.0	1.0	1.0	1.0	1.0	1.0	1.0	1.0	1.0	1.0	1.0	1.0	1.0	1.0	1.0	1.0	1.0	1.0	1.0	1.0	1.0	1.0	1.0	1.0	1.0	1.0	1.0	1.0	1.0	1.0	1.0	1.0	1.0	1.0	1.0	1.0	1.0	1.0	1.0	1.0
COL6A1_a1b1 complex	1.0	1.0	1.0	1.0	1.0	1.0	1.0	1.0	1.0	1.0	1.0	1.0	1.0	1.0	1.0	1.0	1.0	1.0	1.0	1.0	1.0	1.0	1.0	1.0	1.0	1.0	1.0	1.0	1.0	1.0	1.0	1.0	1.0	1.0	1.0	1.0	1.0	1.0	1.0	1.0	1.0	1.0	1.0	1.0	1.0	1.0	1.0	1.0	1.0
COL6A2_a1b1 complex	1.0	1.0	1.0	1.0	1.0	1.0	1.0	1.0	1.0	1.0	1.0	1.0	1.0	1.0	1.0	1.0	1.0	1.0	1.0	1.0	1.0	1.0	1.0	1.0	1.0	1.0	1.0	1.0	1.0	1.0	1.0	1.0	1.0	1.0	1.0	1.0	1.0	1.0	1.0	1.0	1.0	1.0	1.0	1.0	1.0	1.0	1.0	1.0	1.0
COL6A3_a1b1 complex	1.0	1.0	1.0	1.0	1.0	1.0	1.0	1.0	1.0	1.0	1.0	1.0	1.0	1.0	1.0	1.0	1.0	1.0	1.0	1.0	1.0	1.0	1.0	1.0	1.0	1.0	1.0	1.0	1.0	1.0	1.0	1.0	1.0	1.0	1.0	1.0	1.0	1.0	1.0	1.0	1.0	1.0	1.0	1.0	1.0	1.0	1.0	1.0	1.0
COL11A2_a1b1 complex	1.0	1.0	1.0	1.0	1.0	1.0	1.0	1.0	1.0	1.0	1.0	1.0	1.0	1.0	1.0	1.0	1.0	1.0	1.0	1.0	1.0	1.0	1.0	1.0	1.0	1.0	1.0	1.0	1.0	1.0	1.0	1.0	1.0	1.0	1.0	1.0	1.0	1.0	1.0	1.0	1.0	1.0	1.0	1.0	1.0	1.0	1.0	1.0	1.0
COL5A1_a1b1 complex	1.0	1.0	1.0	1.0	1.0	1.0	1.0	1.0	1.0	1.0	1.0	1.0	1.0	1.0	1.0	1.0	1.0	1.0	1.0	1.0	1.0	1.0	1.0	1.0	1.0	1.0	1.0	1.0	1.0	1.0	1.0	1.0	1.0	1.0	1.0	1.0	1.0	1.0	1.0	1.0	1.0	1.0	1.0	1.0	1.0	1.0	1.0	1.0	1.0
COL8A2_a1b1 complex	1.0	1.0	1.0	1.0	1.0	1.0	1.0	1.0	1.0	1.0	1.0	1.0	1.0	1.0	1.0	1.0	1.0	1.0	1.0	1.0	1.0	1.0	1.0	1.0	1.0	1.0	1.0	1.0	1.0	1.0	1.0	1.0	1.0	1.0	1.0	1.0	1.0	1.0	1.0	1.0	1.0	1.0	1.0	1.0	1.0	1.0	1.0	1.0	1.0
COL5A3_a1b1 complex	1.0	1.0	1.0	1.0	1.0	1.0	1.0	1.0	1.0	1.0	1.0	1.0	1.0	1.0	1.0	1.0	1.0	1.0	1.0	1.0	1.0	1.0	1.0	1.0	1.0	1.0	1.0	1.0	1.0	1.0	1.0	1.0	1.0	1.0	1.0	1.0	1.0	1.0	1.0	1.0	1.0	1.0	1.0	1.0	1.0	1.0	1.0	1.0	1.0
COL8A1_a1b1 complex	1.0	1.0	1.0	1.0	1.0	1.0	1.0	1.0	1.0	1.0	1.0	1.0	1.0	1.0	1.0	1.0	1.0	1.0	1.0	1.0	1.0	1.0	1.0	1.0	1.0	1.0	1.0	1.0	1.0	1.0	1.0	1.0	1.0	1.0	1.0	1.0	1.0	1.0	1.0	1.0	1.0	1.0	1.0	1.0	1.0	1.0	1.0	1.0	1.0
COL15A1_a1b1 complex	1.0	1.0	1.0	1.0	1.0	1.0	1.0	1.0	1.0	1.0	1.0	1.0	1.0	1.0	1.0	1.0	1.0	1.0	1.0	1.0	1.0	1.0	1.0	1.0	1.0	1.0	1.0	1.0	1.0	1.0	1.0	1.0	1.0	1.0	1.0	1.0	1.0	1.0	1.0	1.0	1.0	1.0	1.0	1.0	1.0	1.0	1.0	1.0	1.0
COL18A1_a1b1 complex	1.0	1.0	1.0	1.0	1.0	1.0	1.0	1.0	1.0	1.0	1.0	1.0	1.0	1.0	1.0	1.0	1.0	1.0	1.0	1.0	1.0	1.0	1.0	1.0	1.0	1.0	1.0	1.0	1.0	1.0	1.0	1.0	1.0	1.0	1.0	1.0	1.0	1.0	1.0	1.0	1.0	1.0	1.0	1.0	1.0	1.0	1.0	1.0	1.0
COL4A4_a1b1 complex	1.0	1.0	1.0	1.0	1.0	1.0	1.0	1.0	1.0	1.0	1.0	1.0	1.0	1.0	1.0	1.0	1.0	1.0	1.0	1.0	1.0	1.0	1.0	1.0	1.0	1.0	1.0	1.0	1.0	1.0	1.0	1.0	1.0	1.0	1.0	1.0	1.0	1.0	1.0	1.0	1.0	1.0	1.0	1.0	1.0	1.0	1.0	1.0	1.0
COL7A1_a1b1 complex	1.0	1.0	1.0	1.0	1.0	1.0	1.0	1.0	1.0	1.0	1.0	1.0	1.0	1.0	1.0	1.0	1.0	1.0	1.0	1.0	1.0	1.0	1.0	1.0	1.0	1.0	1.0	1.0	1.0	1.0	1.0	1.0	1.0	1.0	1.0	1.0	1.0	1.0	1.0	1.0	1.0	1.0	1.0	1.0	1.0	1.0	1.0	1.0	1.0
COL10A1_a1b1 complex	1.0	1.0	1.0	1.0	1.0	1.0	1.0	1.0	1.0	1.0	1.0	1.0	1.0	1.0	1.0	1.0	1.0	1.0	1.0	1.0	1.0	1.0	1.0	1.0	1.0	1.0	1.0	1.0	1.0	1.0	1.0	1.0	1.0	1.0	1.0	1.0	1.0	1.0	1.0	1.0	1.0	1.0	1.0	1.0	1.0	1.0	1.0	1.0	1.0
COL14A1_a1b1 complex	1.0	1.0	1.0	1.0	1.0	1.0	1.0	1.0	1.0	1.0	1.0	1.0	1.0	1.0	1.0	1.0	1.0	1.0	1.0	1.0	1.0	1.0	1.0	1.0	1.0	1.0	1.0	1.0	1.0	1.0	1.0	1.0	1.0	1.0	1.0	1.0	1.0	1.0	1.0	1.0	1.0	1.0	1.0	1.0	1.0	1.0	1.0	1.0	1.0
COL16A1_a1b1 complex	1.0	1.0	1.0	1.0	1.0	1.0	1.0	1.0	1.0	1.0	1.0	1.0	1.0	1.0	1.0	1.0	1.0	1.0	1.0	1.0	1.0	1.0	1.0	1.0	1.0	1.0	1.0	1.0	1.0	1.0	1.0	1.0	1.0	1.0	1.0	1.0	1.0	1.0	1.0	1.0	1.0	1.0	1.0	1.0	1.0	1.0	1.0	1.0	1.0
COL9A3_a1b1 complex	1.0	1.0	1.0	1.0	1.0	1.0	1.0	1.0	1.0	1.0	1.0	1.0	1.0	1.0	1.0	1.0	1.0	1.0	1.0	1.0	1.0	1.0	1.0	1.0	1.0	1.0	1.0	1.0	1.0	1.0	1.0	1.0	1.0	1.0	1.0	1.0	1.0	1.0	1.0	1.0	1.0	1.0	1.0	1.0	1.0	1.0	1.0	1.0	1.0
COL9A2_a1b1 complex	1.0	1.0	1.0	1.0	1.0	1.0	1.0	1.0	1.0	1.0	1.0	1.0	1.0	1.0	1.0	1.0	1.0	1.0	1.0	1.0	1.0	1.0	1.0	1.0	1.0	1.0	1.0	1.0	1.0	1.0	1.0	1.0	1.0	1.0	1.0	1.0	1.0	1.0	1.0	1.0	1.0	1.0	1.0	1.0	1.0	1.0	1.0	1.0	1.0
COL19A1_a1b1 complex	1.0	1.0	1.0	1.0	1.0	1.0	1.0	1.0	1.0	1.0	1.0	1.0	1.0	1.0	1.0	1.0	1.0	1.0	1.0	1.0	1.0	1.0	1.0	1.0	1.0	1.0	1.0	1.0	1.0	1.0	1.0	1.0	1.0	1.0	1.0	1.0	1.0	1.0	1.0	1.0	1.0	1.0	1.0	1.0	1.0	1.0	1.0	1.0	1.0
COL24A1_a1b1 complex	1.0	1.0	1.0	1.0	1.0	1.0	1.0	1.0	1.0	1.0	1.0	1.0	1.0	1.0	1.0	1.0	1.0	1.0	1.0	1.0	1.0	1.0	1.0	1.0	1.0	1.0	1.0	1.0	1.0	1.0	1.0	1.0	1.0	1.0	1.0	1.0	1.0	1.0	1.0	1.0	1.0	1.0	1.0	1.0	1.0	1.0	1.0	1.0	1.0
COL28A1_a1b1 complex	1.0	1.0	1.0	1.0	1.0	1.0	1.0	1.0	1.0	1.0	1.0	1.0	1.0	1.0	1.0	1.0	1.0	1.0	1.0	1.0	1.0	1.0	1.0	1.0	1.0	1.0	1.0	1.0	1.0	1.0	1.0	1.0	1.0	1.0	1.0	1.0	1.0	1.0	1.0	1.0	1.0	1.0	1.0	1.0	1.0	1.0	1.0	1.0	1.0
COL13A1_a1b1 complex	1.0	1.0	1.0	1.0	1.0	1.0	1.0	1.0	1.0	1.0	1.0	1.0	1.0	1.0	1.0	1.0	1.0	1.0	1.0	1.0	1.0	1.0	1.0	1.0	1.0	1.0	1.0	1.0	1.0	1.0	1.0	1.0	1.0	1.0	1.0	1.0	1.0	1.0	1.0	1.0	1.0	1.0	1.0	1.0	1.0	1.0	1.0	1.0	1.0
COL27A1_a1b1 complex	1.0	1.0	1.0	1.0	1.0	1.0	1.0	1.0	1.0	1.0	1.0	1.0	1.0	1.0	1.0	1.0	1.0	1.0	1.0	1.0	1.0	1.0	1.0	1.0	1.0	1.0	1.0	1.0	1.0	1.0	1.0	1.0	1.0	1.0	1.0	1.0	1.0	1.0	1.0	1.0	1.0	1.0	1.0	1.0	1.0	1.0	1.0	1.0	1.0
COL26A1_a1b1 complex	1.0	1.0	1.0	1.0	1.0	1.0	1.0	1.0	1.0	1.0	1.0	1.0	1.0	1.0	1.0	1.0	1.0	1.0	1.0	1.0	1.0	1.0	1.0	1.0	1.0	1.0	1.0	1.0	1.0	1.0	1.0	1.0	1.0	1.0	1.0	1.0	1.0	1.0	1.0	1.0	1.0	1.0	1.0	1.0	1.0	1.0	1.0	1.0	1.0
COL21A1_a1b1 complex	1.0	1.0	1.0	1.0	1.0	1.0	1.0	1.0	1.0	1.0	1.0	1.0	1.0	1.0	1.0	1.0	1.0	1.0	1.0	1.0	1.0	1.0	1.0	1.0	1.0	1.0	1.0	1.0	1.0	1.0	1.0	1.0	1.0	1.0	1.0	1.0	1.0	1.0	1.0	1.0	1.0	1.0	1.0	1.0	1.0	1.0	1.0	1.0	1.0
COL12A1_a1b1 complex	1.0	1.0	1.0	1.0	1.0	1.0	1.0	1.0	1.0	1.0	1.0	1.0	1.0	1.0	1.0	1.0	1.0	1.0	1.0	1.0	1.0	1.0	1.0	1.0	1.0	1.0	1.0	1.0	1.0	1.0	1.0	1.0	1.0	1.0	1.0	1.0	1.0	1.0	1.0	1.0	1.0	1.0	1.0	1.0	1.0	1.0	1.0	1.0	1.0
COL17A1_a1b1 complex	1.0	1.0	1.0	1.0	1.0	1.0	1.0	1.0	1.0	1.0	1.0	1.0	1.0	1.0	1.0	1.0	1.0	1.0	1.0	1.0	1.0	1.0	1.0	1.0	1.0	1.0	1.0	1.0	1.0	1.0	1.0	1.0	1.0	1.0	1.0	1.0	1.0	1.0	1.0	1.0	1.0	1.0	1.0	1.0	1.0	1.0	1.0	1.0	1.0
SEMA7A_a1b1 complex	1.0	1.0	1.0	1.0	1.0	1.0	1.0	1.0	1.0	1.0	1.0	1.0	1.0	1.0	1.0	1.0	1.0	1.0	1.0	1.0	1.0	1.0	1.0	1.0	1.0	1.0	1.0	1.0	1.0	1.0	1.0	1.0	1.0	1.0	1.0	1.0	1.0	1.0	1.0	1.0	1.0	1.0	1.0	1.0	1.0	1.0	1.0	1.0	1.0
FN1_a2Bb3 complex	1.0	1.0	1.0	1.0	1.0	1.0	1.0	1.0	1.0	1.0	1.0	1.0	1.0	1.0	1.0	1.0	1.0	1.0	1.0	1.0	1.0	1.0	1.0	1.0	1.0	1.0	1.0	1.0	1.0	1.0	1.0	1.0	1.0	1.0	1.0	1.0	1.0	1.0	1.0	1.0	1.0	1.0	1.0	1.0	1.0	1.0	1.0	1.0	1.0
PLG_a2Bb3 complex	1.0	1.0	1.0	1.0	1.0	1.0	1.0	1.0	1.0	1.0	1.0	1.0	1.0	1.0	1.0	1.0	1.0	1.0	1.0	1.0	1.0	1.0	1.0	1.0	1.0	1.0	1.0	1.0	1.0	1.0	1.0	1.0	1.0	1.0	1.0	1.0	1.0	1.0	1.0	1.0	1.0	1.0	1.0	1.0	1.0	1.0	1.0	1.0	1.0
THBS1_a2Bb3 complex	1.0	1.0	1.0	1.0	1.0	1.0	1.0	1.0	1.0	1.0	1.0	1.0	1.0	1.0	1.0	1.0	1.0	1.0	1.0	1.0	1.0	1.0	1.0	1.0	1.0	1.0	1.0	1.0	1.0	1.0	1.0	1.0	1.0	1.0	1.0	1.0	1.0	1.0	1.0	1.0	1.0	1.0	1.0	1.0	1.0	1.0	1.0	1.0	1.0
CD40LG_a2Bb3 complex	1.0	1.0	1.0	1.0	1.0	1.0	1.0	1.0	1.0	1.0	1.0	1.0	1.0	1.0	1.0	1.0	1.0	1.0	1.0	1.0	1.0	1.0	1.0	1.0	1.0	1.0	1.0	1.0	1.0	1.0	1.0	1.0	1.0	1.0	1.0	1.0	1.0	1.0	1.0	1.0	1.0	1.0	1.0	1.0	1.0	1.0	1.0	1.0	1.0
FN1_a4b1 complex	1.0	1.0	1.0	1.0	1.0	1.0	1.0	1.0	1.0	1.0	1.0	1.0	1.0	1.0	1.0	1.0	1.0	1.0	1.0	1.0	1.0	1.0	1.0	1.0	1.0	1.0	1.0	1.0	1.0	1.0	1.0	1.0	1.0	1.0	1.0	1.0	1.0	1.0	1.0	1.0	1.0	1.0	1.0	1.0	1.0	1.0	1.0	1.0	1.0
SPP1_a4b1 complex	1.0	1.0	1.0	1.0	1.0	1.0	1.0	1.0	1.0	1.0	1.0	1.0	1.0	1.0	1.0	1.0	1.0	1.0	1.0	1.0	1.0	1.0	1.0	1.0	1.0	1.0	1.0	1.0	1.0	1.0	1.0	1.0	1.0	1.0	1.0	1.0	1.0	1.0	1.0	1.0	1.0	1.0	1.0	1.0	1.0	1.0	1.0	1.0	1.0
TNC_a4b1 complex	1.0	1.0	1.0	1.0	1.0	1.0	1.0	1.0	1.0	1.0	1.0	1.0	1.0	1.0	1.0	1.0	1.0	1.0	1.0	1.0	1.0	1.0	1.0	1.0	1.0	1.0	1.0	1.0	1.0	1.0	1.0	1.0	1.0	1.0	1.0	1.0	1.0	1.0	1.0	1.0	1.0	1.0	1.0	1.0	1.0	1.0	1.0	1.0	1.0
PLAUR_a4b1 complex	1.0	1.0	1.0	1.0	1.0	1.0	1.0	1.0	1.0	1.0	1.0	1.0	1.0	1.0	1.0	1.0	1.0	1.0	1.0	1.0	1.0	1.0	1.0	1.0	1.0	1.0	1.0	1.0	1.0	1.0	1.0	1.0	1.0	1.0	1.0	1.0	1.0	1.0	1.0	1.0	1.0	1.0	1.0	1.0	1.0	1.0	1.0	1.0	1.0
VCAM1_a4b1 complex	1.0	1.0	1.0	1.0	1.0	1.0	1.0	1.0	1.0	1.0	1.0	1.0	1.0	1.0	1.0	1.0	1.0	1.0	1.0	1.0	1.0	1.0	1.0	1.0	1.0	1.0	1.0	1.0	1.0	1.0	1.0	1.0	1.0	1.0	1.0	1.0	1.0	1.0	1.0	1.0	1.0	1.0	1.0	1.0	1.0	1.0	1.0	1.0	1.0
JAM2_a4b1 complex	1.0	1.0	1.0	1.0	1.0	1.0	1.0	1.0	1.0	1.0	1.0	1.0	1.0	1.0	1.0	1.0	1.0	1.0	1.0	1.0	1.0	1.0	1.0	1.0	1.0	1.0	1.0	1.0	1.0	1.0	1.0	1.0	1.0	1.0	1.0	1.0	1.0	1.0	1.0	1.0	1.0	1.0	1.0	1.0	1.0	1.0	1.0	1.0	1.0
FN1_a4b7 complex	1.0	1.0	1.0	1.0	1.0	1.0	1.0	1.0	1.0	1.0	1.0	1.0	1.0	1.0	1.0	1.0	1.0	1.0	1.0	1.0	1.0	1.0	1.0	1.0	1.0	1.0	1.0	1.0	1.0	1.0	1.0	1.0	1.0	1.0	1.0	1.0	1.0	1.0	1.0	1.0	1.0	1.0	1.0	1.0	1.0	1.0	1.0	1.0	1.0
VCAM1_a4b7 complex	1.0	1.0	1.0	1.0	1.0	1.0	1.0	1.0	1.0	1.0	1.0	1.0	1.0	1.0	1.0	1.0	1.0	1.0	1.0	1.0	1.0	1.0	1.0	1.0	1.0	1.0	1.0	1.0	1.0	1.0	1.0	1.0	1.0	1.0	1.0	1.0	1.0	1.0	1.0	1.0	1.0	1.0	1.0	1.0	1.0	1.0	1.0	1.0	1.0
FN1_a5b1 complex	1.0	1.0	1.0	1.0	1.0	1.0	1.0	1.0	1.0	1.0	1.0	1.0	1.0	1.0	1.0	1.0	1.0	1.0	1.0	1.0	1.0	1.0	1.0	1.0	1.0	1.0	1.0	1.0	1.0	1.0	1.0	1.0	1.0	1.0	1.0	1.0	1.0	1.0	1.0	1.0	1.0	1.0	1.0	1.0	1.0	1.0	1.0	1.0	1.0
CD40LG_a5b1 complex	1.0	1.0	1.0	1.0	1.0	1.0	1.0	1.0	1.0	1.0	1.0	1.0	1.0	1.0	1.0	1.0	1.0	1.0	1.0	1.0	1.0	1.0	1.0	1.0	1.0	1.0	1.0	1.0	1.0	1.0	1.0	1.0	1.0	1.0	1.0	1.0	1.0	1.0	1.0	1.0	1.0	1.0	1.0	1.0	1.0	1.0	1.0	1.0	1.0
FBN1_a5b1 complex	1.0	1.0	1.0	1.0	1.0	1.0	1.0	1.0	1.0	1.0	1.0	1.0	1.0	1.0	1.0	1.0	1.0	1.0	1.0	1.0	1.0	1.0	1.0	1.0	1.0	1.0	1.0	1.0	1.0	1.0	1.0	1.0	1.0	1.0	1.0	1.0	1.0	1.0	1.0	1.0	1.0	1.0	1.0	1.0	1.0	1.0	1.0	1.0	1.0
FN1_a8b1 complex	1.0	1.0	1.0	1.0	1.0	1.0	1.0	1.0	1.0	1.0	1.0	1.0	1.0	1.0	1.0	1.0	1.0	1.0	1.0	1.0	1.0	1.0	1.0	1.0	1.0	1.0	1.0	1.0	1.0	1.0	1.0	1.0	1.0	1.0	1.0	1.0	1.0	1.0	1.0	1.0	1.0	1.0	1.0	1.0	1.0	1.0	1.0	1.0	1.0
TNC_a8b1 complex	1.0	1.0	1.0	1.0	1.0	1.0	1.0	1.0	1.0	1.0	1.0	1.0	1.0	1.0	1.0	1.0	1.0	1.0	1.0	1.0	1.0	1.0	1.0	1.0	1.0	1.0	1.0	1.0	1.0	1.0	1.0	1.0	1.0	1.0	1.0	1.0	1.0	1.0	1.0	1.0	1.0	1.0	1.0	1.0	1.0	1.0	1.0	1.0	1.0
FN1_aVb1 complex	1.0	1.0	1.0	1.0	1.0	1.0	1.0	1.0	1.0	1.0	1.0	1.0	1.0	1.0	1.0	1.0	1.0	1.0	1.0	1.0	1.0	1.0	1.0	1.0	1.0	1.0	1.0	1.0	1.0	1.0	1.0	1.0	1.0	1.0	1.0	1.0	1.0	1.0	1.0	1.0	1.0	1.0	1.0	1.0	1.0	1.0	1.0	1.0	1.0
FN1_aVb5 complex	1.0	1.0	1.0	1.0	1.0	1.0	1.0	1.0	1.0	1.0	1.0	1.0	1.0	1.0	1.0	1.0	1.0	1.0	1.0	1.0	1.0	1.0	1.0	1.0	1.0	1.0	1.0	1.0	1.0	1.0	1.0	1.0	1.0	1.0	1.0	1.0	1.0	1.0	1.0	1.0	1.0	1.0	1.0	1.0	1.0	1.0	1.0	1.0	1.0
LAMC1_a6b1 complex	1.0	1.0	1.0	1.0	1.0	1.0	1.0	1.0	1.0	1.0	1.0	1.0	1.0	1.0	1.0	1.0	1.0	1.0	1.0	1.0	1.0	1.0	1.0	1.0	1.0	1.0	1.0	1.0	1.0	1.0	1.0	1.0	1.0	1.0	1.0	1.0	1.0	1.0	1.0	1.0	1.0	1.0	1.0	1.0	1.0	1.0	1.0	1.0	1.0
LAMC1_a7b1 complex	1.0	1.0	1.0	1.0	1.0	1.0	1.0	1.0	1.0	1.0	1.0	1.0	1.0	1.0	1.0	1.0	1.0	1.0	1.0	1.0	1.0	1.0	1.0	1.0	1.0	1.0	1.0	1.0	1.0	1.0	1.0	1.0	1.0	1.0	1.0	1.0	1.0	1.0	1.0	1.0	1.0	1.0	1.0	1.0	1.0	1.0	1.0	1.0	1.0
CDH1_aEb7 complex	1.0	1.0	1.0	1.0	1.0	1.0	1.0	1.0	1.0	1.0	1.0	1.0	1.0	1.0	1.0	1.0	1.0	1.0	1.0	1.0	1.0	1.0	1.0	1.0	1.0	1.0	1.0	1.0	1.0	1.0	1.0	1.0	1.0	1.0	1.0	1.0	1.0	1.0	1.0	1.0	1.0	1.0	1.0	1.0	1.0	1.0	1.0	1.0	1.0
SPP1_a9b1 complex	1.0	1.0	1.0	1.0	1.0	1.0	1.0	1.0	1.0	1.0	1.0	1.0	1.0	1.0	1.0	1.0	1.0	1.0	1.0	1.0	1.0	1.0	1.0	1.0	1.0	1.0	1.0	1.0	1.0	1.0	1.0	1.0	1.0	1.0	1.0	1.0	1.0	1.0	1.0	1.0	1.0	1.0	1.0	1.0	1.0	1.0	1.0	1.0	1.0
TNC_a9b1 complex	1.0	1.0	1.0	1.0	1.0	1.0	1.0	1.0	1.0	1.0	1.0	1.0	1.0	1.0	1.0	1.0	1.0	1.0	1.0	1.0	1.0	1.0	1.0	1.0	1.0	1.0	1.0	1.0	1.0	1.0	1.0	1.0	1.0	1.0	1.0	1.0	1.0	1.0	1.0	1.0	1.0	1.0	1.0	1.0	1.0	1.0	1.0	1.0	1.0
VCAM1_a9b1 complex	1.0	1.0	1.0	1.0	1.0	1.0	1.0	1.0	1.0	1.0	1.0	1.0	1.0	1.0	1.0	1.0	1.0	1.0	1.0	1.0	1.0	1.0	1.0	1.0	1.0	1.0	1.0	1.0	1.0	1.0	1.0	1.0	1.0	1.0	1.0	1.0	1.0	1.0	1.0	1.0	1.0	1.0	1.0	1.0	1.0	1.0	1.0	1.0	1.0
THY1_aMb2 complex	1.0	1.0	1.0	1.0	1.0	1.0	1.0	1.0	1.0	1.0	1.0	1.0	1.0	1.0	1.0	1.0	1.0	1.0	1.0	1.0	1.0	1.0	1.0	1.0	1.0	1.0	1.0	1.0	1.0	1.0	1.0	1.0	1.0	1.0	1.0	1.0	1.0	1.0	1.0	1.0	1.0	1.0	1.0	1.0	1.0	1.0	1.0	1.0	1.0
FCER2_aMb2 complex	1.0	1.0	1.0	1.0	1.0	1.0	1.0	1.0	1.0	1.0	1.0	1.0	1.0	1.0	1.0	1.0	1.0	1.0	1.0	1.0	1.0	1.0	1.0	1.0	1.0	1.0	1.0	1.0	1.0	1.0	1.0	1.0	1.0	1.0	1.0	1.0	1.0	1.0	1.0	1.0	1.0	1.0	1.0	1.0	1.0	1.0	1.0	1.0	1.0
ICAM1_aMb2 complex	1.0	1.0	1.0	1.0	1.0	1.0	1.0	1.0	1.0	1.0	1.0	1.0	1.0	1.0	1.0	1.0	1.0	1.0	1.0	1.0	1.0	1.0	1.0	1.0	1.0	1.0	1.0	1.0	1.0	1.0	1.0	1.0	1.0	1.0	1.0	1.0	1.0	1.0	1.0	1.0	1.0	1.0	1.0	1.0	1.0	1.0	1.0	1.0	1.0
C3_aMb2 complex	1.0	1.0	1.0	1.0	1.0	1.0	1.0	1.0	1.0	1.0	1.0	1.0	1.0	1.0	1.0	1.0	1.0	1.0	1.0	1.0	1.0	1.0	1.0	1.0	1.0	1.0	1.0	1.0	1.0	1.0	1.0	1.0	1.0	1.0	1.0	1.0	1.0	1.0	1.0	1.0	1.0	1.0	1.0	1.0	1.0	1.0	1.0	1.0	1.0
GP1BA_aMb2 complex	1.0	1.0	1.0	1.0	1.0	1.0	1.0	1.0	1.0	1.0	1.0	1.0	1.0	1.0	1.0	1.0	1.0	1.0	1.0	1.0	1.0	1.0	1.0	1.0	1.0	1.0	1.0	1.0	1.0	1.0	1.0	1.0	1.0	1.0	1.0	1.0	1.0	1.0	1.0	1.0	1.0	1.0	1.0	1.0	1.0	1.0	1.0	1.0	1.0
JAM3_aMb2 complex	1.0	1.0	1.0	1.0	1.0	1.0	1.0	1.0	1.0	1.0	1.0	1.0	1.0	1.0	1.0	1.0	1.0	1.0	1.0	1.0	1.0	1.0	1.0	1.0	1.0	1.0	1.0	1.0	1.0	1.0	1.0	1.0	1.0	1.0	1.0	1.0	1.0	1.0	1.0	1.0	1.0	1.0	1.0	1.0	1.0	1.0	1.0	1.0	1.0
THY1_aXb2 complex	1.0	1.0	1.0	1.0	1.0	1.0	1.0	1.0	1.0	1.0	1.0	1.0	1.0	1.0	1.0	1.0	1.0	1.0	1.0	1.0	1.0	1.0	1.0	1.0	1.0	1.0	1.0	1.0	1.0	1.0	1.0	1.0	1.0	1.0	1.0	1.0	1.0	1.0	1.0	1.0	1.0	1.0	1.0	1.0	1.0	1.0	1.0	1.0	1.0
FCER2_aXb2 complex	1.0	1.0	1.0	1.0	1.0	1.0	1.0	1.0	1.0	1.0	1.0	1.0	1.0	1.0	1.0	1.0	1.0	1.0	1.0	1.0	1.0	1.0	1.0	1.0	1.0	1.0	1.0	1.0	1.0	1.0	1.0	1.0	1.0	1.0	1.0	1.0	1.0	1.0	1.0	1.0	1.0	1.0	1.0	1.0	1.0	1.0	1.0	1.0	1.0
ICAM1_aXb2 complex	1.0	1.0	1.0	1.0	1.0	1.0	1.0	1.0	1.0	1.0	1.0	1.0	1.0	1.0	1.0	1.0	1.0	1.0	1.0	1.0	1.0	1.0	1.0	1.0	1.0	1.0	1.0	1.0	1.0	1.0	1.0	1.0	1.0	1.0	1.0	1.0	1.0	1.0	1.0	1.0	1.0	1.0	1.0	1.0	1.0	1.0	1.0	1.0	1.0
ACVR1_BMPR2_BMP5	1.0	1.0	1.0	1.0	1.0	1.0	1.0	1.0	1.0	1.0	1.0	1.0	1.0	1.0	1.0	1.0	1.0	1.0	1.0	1.0	1.0	1.0	1.0	1.0	1.0	1.0	1.0	1.0	1.0	1.0	1.0	1.0	1.0	1.0	1.0	1.0	1.0	1.0	1.0	1.0	1.0	1.0	1.0	1.0	1.0	1.0	1.0	1.0	1.0
ACVR_1A2A receptor_BMP5	1.0	1.0	1.0	1.0	1.0	1.0	1.0	1.0	1.0	1.0	1.0	1.0	1.0	1.0	1.0	1.0	1.0	1.0	1.0	1.0	1.0	1.0	1.0	1.0	1.0	1.0	1.0	1.0	1.0	1.0	1.0	1.0	1.0	1.0	1.0	1.0	1.0	1.0	1.0	1.0	1.0	1.0	1.0	1.0	1.0	1.0	1.0	1.0	1.0
ACVR_1A2B receptor_BMP5	1.0	1.0	1.0	1.0	1.0	1.0	1.0	1.0	1.0	1.0	1.0	1.0	1.0	1.0	1.0	1.0	1.0	1.0	1.0	1.0	1.0	1.0	1.0	1.0	1.0	1.0	1.0	1.0	1.0	1.0	1.0	1.0	1.0	1.0	1.0	1.0	1.0	1.0	1.0	1.0	1.0	1.0	1.0	1.0	1.0	1.0	1.0	1.0	1.0
BMPR1A_BMPR2_BMP5	1.0	1.0	1.0	1.0	1.0	1.0	1.0	1.0	1.0	1.0	1.0	1.0	1.0	1.0	1.0	1.0	1.0	1.0	1.0	1.0	1.0	1.0	1.0	1.0	1.0	1.0	1.0	1.0	1.0	1.0	1.0	1.0	1.0	1.0	1.0	1.0	1.0	1.0	1.0	1.0	1.0	1.0	1.0	1.0	1.0	1.0	1.0	1.0	1.0
BMR1A_ACR2A_BMP5	1.0	1.0	1.0	1.0	1.0	1.0	1.0	1.0	1.0	1.0	1.0	1.0	1.0	1.0	1.0	1.0	1.0	1.0	1.0	1.0	1.0	1.0	1.0	1.0	1.0	1.0	1.0	1.0	1.0	1.0	1.0	1.0	1.0	1.0	1.0	1.0	1.0	1.0	1.0	1.0	1.0	1.0	1.0	1.0	1.0	1.0	1.0	1.0	1.0
BMR1A_AVR2B_BMP5	1.0	1.0	1.0	1.0	1.0	1.0	1.0	1.0	1.0	1.0	1.0	1.0	1.0	1.0	1.0	1.0	1.0	1.0	1.0	1.0	1.0	1.0	1.0	1.0	1.0	1.0	1.0	1.0	1.0	1.0	1.0	1.0	1.0	1.0	1.0	1.0	1.0	1.0	1.0	1.0	1.0	1.0	1.0	1.0	1.0	1.0	1.0	1.0	1.0
ACVR1_BMPR2_BMP6	1.0	1.0	1.0	1.0	1.0	1.0	1.0	1.0	1.0	1.0	1.0	1.0	1.0	1.0	1.0	1.0	1.0	1.0	1.0	1.0	1.0	1.0	1.0	1.0	1.0	1.0	1.0	1.0	1.0	1.0	1.0	1.0	1.0	1.0	1.0	1.0	1.0	1.0	1.0	1.0	1.0	1.0	1.0	1.0	1.0	1.0	1.0	1.0	1.0
ACVR_1A2A receptor_BMP6	1.0	1.0	1.0	1.0	1.0	1.0	1.0	1.0	1.0	1.0	1.0	1.0	1.0	1.0	1.0	1.0	1.0	1.0	1.0	1.0	1.0	1.0	1.0	1.0	1.0	1.0	1.0	1.0	1.0	1.0	1.0	1.0	1.0	1.0	1.0	1.0	1.0	1.0	1.0	1.0	1.0	1.0	1.0	1.0	1.0	1.0	1.0	1.0	1.0
ACVR_1A2B receptor_BMP6	1.0	1.0	1.0	1.0	1.0	1.0	1.0	1.0	1.0	1.0	1.0	1.0	1.0	1.0	1.0	1.0	1.0	1.0	1.0	1.0	1.0	1.0	1.0	1.0	1.0	1.0	1.0	1.0	1.0	1.0	1.0	1.0	1.0	1.0	1.0	1.0	1.0	1.0	1.0	1.0	1.0	1.0	1.0	1.0	1.0	1.0	1.0	1.0	1.0
BMPR1A_BMPR2_BMP6	1.0	1.0	1.0	1.0	1.0	1.0	1.0	1.0	1.0	1.0	1.0	1.0	1.0	1.0	1.0	1.0	1.0	1.0	1.0	1.0	1.0	1.0	1.0	1.0	1.0	1.0	1.0	1.0	1.0	1.0	1.0	1.0	1.0	1.0	1.0	1.0	1.0	1.0	1.0	1.0	1.0	1.0	1.0	1.0	1.0	1.0	1.0	1.0	1.0
BMR1A_ACR2A_BMP6	1.0	1.0	1.0	1.0	1.0	1.0	1.0	1.0	1.0	1.0	1.0	1.0	1.0	1.0	1.0	1.0	1.0	1.0	1.0	1.0	1.0	1.0	1.0	1.0	1.0	1.0	1.0	1.0	1.0	1.0	1.0	1.0	1.0	1.0	1.0	1.0	1.0	1.0	1.0	1.0	1.0	1.0	1.0	1.0	1.0	1.0	1.0	1.0	1.0
BMR1A_AVR2B_BMP6	1.0	1.0	1.0	1.0	1.0	1.0	1.0	1.0	1.0	1.0	1.0	1.0	1.0	1.0	1.0	1.0	1.0	1.0	1.0	1.0	1.0	1.0	1.0	1.0	1.0	1.0	1.0	1.0	1.0	1.0	1.0	1.0	1.0	1.0	1.0	1.0	1.0	1.0	1.0	1.0	1.0	1.0	1.0	1.0	1.0	1.0	1.0	1.0	1.0
ACVR1_BMPR2_BMP8A	1.0	1.0	1.0	1.0	1.0	1.0	1.0	1.0	1.0	1.0	1.0	1.0	1.0	1.0	1.0	1.0	1.0	1.0	1.0	1.0	1.0	1.0	1.0	1.0	1.0	1.0	1.0	1.0	1.0	1.0	1.0	1.0	1.0	1.0	1.0	1.0	1.0	1.0	1.0	1.0	1.0	1.0	1.0	1.0	1.0	1.0	1.0	1.0	1.0
ACVR_1A2A receptor_BMP8A	1.0	1.0	1.0	1.0	1.0	1.0	1.0	1.0	1.0	1.0	1.0	1.0	1.0	1.0	1.0	1.0	1.0	1.0	1.0	1.0	1.0	1.0	1.0	1.0	1.0	1.0	1.0	1.0	1.0	1.0	1.0	1.0	1.0	1.0	1.0	1.0	1.0	1.0	1.0	1.0	1.0	1.0	1.0	1.0	1.0	1.0	1.0	1.0	1.0
ACVR_1A2B receptor_BMP8A	1.0	1.0	1.0	1.0	1.0	1.0	1.0	1.0	1.0	1.0	1.0	1.0	1.0	1.0	1.0	1.0	1.0	1.0	1.0	1.0	1.0	1.0	1.0	1.0	1.0	1.0	1.0	1.0	1.0	1.0	1.0	1.0	1.0	1.0	1.0	1.0	1.0	1.0	1.0	1.0	1.0	1.0	1.0	1.0	1.0	1.0	1.0	1.0	1.0
BMPR1A_BMPR2_BMP8A	1.0	1.0	1.0	1.0	1.0	1.0	1.0	1.0	1.0	1.0	1.0	1.0	1.0	1.0	1.0	1.0	1.0	1.0	1.0	1.0	1.0	1.0	1.0	1.0	1.0	1.0	1.0	1.0	1.0	1.0	1.0	1.0	1.0	1.0	1.0	1.0	1.0	1.0	1.0	1.0	1.0	1.0	1.0	1.0	1.0	1.0	1.0	1.0	1.0
BMR1A_ACR2A_BMP8A	1.0	1.0	1.0	1.0	1.0	1.0	1.0	1.0	1.0	1.0	1.0	1.0	1.0	1.0	1.0	1.0	1.0	1.0	1.0	1.0	1.0	1.0	1.0	1.0	1.0	1.0	1.0	1.0	1.0	1.0	1.0	1.0	1.0	1.0	1.0	1.0	1.0	1.0	1.0	1.0	1.0	1.0	1.0	1.0	1.0	1.0	1.0	1.0	1.0
BMR1A_AVR2B_BMP8A	1.0	1.0	1.0	1.0	1.0	1.0	1.0	1.0	1.0	1.0	1.0	1.0	1.0	1.0	1.0	1.0	1.0	1.0	1.0	1.0	1.0	1.0	1.0	1.0	1.0	1.0	1.0	1.0	1.0	1.0	1.0	1.0	1.0	1.0	1.0	1.0	1.0	1.0	1.0	1.0	1.0	1.0	1.0	1.0	1.0	1.0	1.0	1.0	1.0
ACVR_1A2A receptor_INHBA	1.0	1.0	1.0	1.0	1.0	1.0	1.0	1.0	1.0	1.0	1.0	1.0	1.0	1.0	1.0	1.0	1.0	1.0	1.0	1.0	1.0	1.0	1.0	1.0	1.0	1.0	1.0	1.0	1.0	1.0	1.0	1.0	1.0	1.0	1.0	1.0	1.0	1.0	1.0	1.0	1.0	1.0	1.0	1.0	1.0	1.0	1.0	1.0	1.0
ACVR_1A2B receptor_INHBA	1.0	1.0	1.0	1.0	1.0	1.0	1.0	1.0	1.0	1.0	1.0	1.0	1.0	1.0	1.0	1.0	1.0	1.0	1.0	1.0	1.0	1.0	1.0	1.0	1.0	1.0	1.0	1.0	1.0	1.0	1.0	1.0	1.0	1.0	1.0	1.0	1.0	1.0	1.0	1.0	1.0	1.0	1.0	1.0	1.0	1.0	1.0	1.0	1.0
ACVR_1B2A receptor_INHBA	1.0	1.0	1.0	1.0	1.0	1.0	1.0	1.0	1.0	1.0	1.0	1.0	1.0	1.0	1.0	1.0	1.0	1.0	1.0	1.0	1.0	1.0	1.0	1.0	1.0	1.0	1.0	1.0	1.0	1.0	1.0	1.0	1.0	1.0	1.0	1.0	1.0	1.0	1.0	1.0	1.0	1.0	1.0	1.0	1.0	1.0	1.0	1.0	1.0
ACVR_1B2B receptor_INHBA	1.0	1.0	1.0	1.0	1.0	1.0	1.0	1.0	1.0	1.0	1.0	1.0	1.0	1.0	1.0	1.0	1.0	1.0	1.0	1.0	1.0	1.0	1.0	1.0	1.0	1.0	1.0	1.0	1.0	1.0	1.0	1.0	1.0	1.0	1.0	1.0	1.0	1.0	1.0	1.0	1.0	1.0	1.0	1.0	1.0	1.0	1.0	1.0	1.0
ACVR_1C2A receptor_INHBA	1.0	1.0	1.0	1.0	1.0	1.0	1.0	1.0	1.0	1.0	1.0	1.0	1.0	1.0	1.0	1.0	1.0	1.0	1.0	1.0	1.0	1.0	1.0	1.0	1.0	1.0	1.0	1.0	1.0	1.0	1.0	1.0	1.0	1.0	1.0	1.0	1.0	1.0	1.0	1.0	1.0	1.0	1.0	1.0	1.0	1.0	1.0	1.0	1.0
ACVR_1C2B receptor_INHBA	1.0	1.0	1.0	1.0	1.0	1.0	1.0	1.0	1.0	1.0	1.0	1.0	1.0	1.0	1.0	1.0	1.0	1.0	1.0	1.0	1.0	1.0	1.0	1.0	1.0	1.0	1.0	1.0	1.0	1.0	1.0	1.0	1.0	1.0	1.0	1.0	1.0	1.0	1.0	1.0	1.0	1.0	1.0	1.0	1.0	1.0	1.0	1.0	1.0
ACVR_1A2A receptor_INHBB	1.0	1.0	1.0	1.0	1.0	1.0	1.0	1.0	1.0	1.0	1.0	1.0	1.0	1.0	1.0	1.0	1.0	1.0	1.0	1.0	1.0	1.0	1.0	1.0	1.0	1.0	1.0	1.0	1.0	1.0	1.0	1.0	1.0	1.0	1.0	1.0	1.0	1.0	1.0	1.0	1.0	1.0	1.0	1.0	1.0	1.0	1.0	1.0	1.0
ACVR_1A2B receptor_INHBB	1.0	1.0	1.0	1.0	1.0	1.0	1.0	1.0	1.0	1.0	1.0	1.0	1.0	1.0	1.0	1.0	1.0	1.0	1.0	1.0	1.0	1.0	1.0	1.0	1.0	1.0	1.0	1.0	1.0	1.0	1.0	1.0	1.0	1.0	1.0	1.0	1.0	1.0	1.0	1.0	1.0	1.0	1.0	1.0	1.0	1.0	1.0	1.0	1.0
ACVR_1B2A receptor_INHBB	1.0	1.0	1.0	1.0	1.0	1.0	1.0	1.0	1.0	1.0	1.0	1.0	1.0	1.0	1.0	1.0	1.0	1.0	1.0	1.0	1.0	1.0	1.0	1.0	1.0	1.0	1.0	1.0	1.0	1.0	1.0	1.0	1.0	1.0	1.0	1.0	1.0	1.0	1.0	1.0	1.0	1.0	1.0	1.0	1.0	1.0	1.0	1.0	1.0
ACVR_1B2B receptor_INHBB	1.0	1.0	1.0	1.0	1.0	1.0	1.0	1.0	1.0	1.0	1.0	1.0	1.0	1.0	1.0	1.0	1.0	1.0	1.0	1.0	1.0	1.0	1.0	1.0	1.0	1.0	1.0	1.0	1.0	1.0	1.0	1.0	1.0	1.0	1.0	1.0	1.0	1.0	1.0	1.0	1.0	1.0	1.0	1.0	1.0	1.0	1.0	1.0	1.0
ACVR_1C2A receptor_INHBB	1.0	1.0	1.0	1.0	1.0	1.0	1.0	1.0	1.0	1.0	1.0	1.0	1.0	1.0	1.0	1.0	1.0	1.0	1.0	1.0	1.0	1.0	1.0	1.0	1.0	1.0	1.0	1.0	1.0	1.0	1.0	1.0	1.0	1.0	1.0	1.0	1.0	1.0	1.0	1.0	1.0	1.0	1.0	1.0	1.0	1.0	1.0	1.0	1.0
ACVR_1C2B receptor_INHBB	1.0	1.0	1.0	1.0	1.0	1.0	1.0	1.0	1.0	1.0	1.0	1.0	1.0	1.0	1.0	1.0	1.0	1.0	1.0	1.0	1.0	1.0	1.0	1.0	1.0	1.0	1.0	1.0	1.0	1.0	1.0	1.0	1.0	1.0	1.0	1.0	1.0	1.0	1.0	1.0	1.0	1.0	1.0	1.0	1.0	1.0	1.0	1.0	1.0
BMPR1A_BMPR2_BMP2	1.0	1.0	1.0	1.0	1.0	1.0	1.0	1.0	1.0	1.0	1.0	1.0	1.0	1.0	1.0	1.0	1.0	1.0	1.0	1.0	1.0	1.0	1.0	1.0	1.0	1.0	1.0	1.0	1.0	1.0	1.0	1.0	1.0	1.0	1.0	1.0	1.0	1.0	1.0	1.0	1.0	1.0	1.0	1.0	1.0	1.0	1.0	1.0	1.0
BMR1A_ACR2A_BMP2	1.0	1.0	1.0	1.0	1.0	1.0	1.0	1.0	1.0	1.0	1.0	1.0	1.0	1.0	1.0	1.0	1.0	1.0	1.0	1.0	1.0	1.0	1.0	1.0	1.0	1.0	1.0	1.0	1.0	1.0	1.0	1.0	1.0	1.0	1.0	1.0	1.0	1.0	1.0	1.0	1.0	1.0	1.0	1.0	1.0	1.0	1.0	1.0	1.0
BMR1A_AVR2B_BMP2	1.0	1.0	1.0	1.0	1.0	1.0	1.0	1.0	1.0	1.0	1.0	1.0	1.0	1.0	1.0	1.0	1.0	1.0	1.0	1.0	1.0	1.0	1.0	1.0	1.0	1.0	1.0	1.0	1.0	1.0	1.0	1.0	1.0	1.0	1.0	1.0	1.0	1.0	1.0	1.0	1.0	1.0	1.0	1.0	1.0	1.0	1.0	1.0	1.0
BMPR1A_BMPR2_BMP4	1.0	1.0	1.0	1.0	1.0	1.0	1.0	1.0	1.0	1.0	1.0	1.0	1.0	1.0	1.0	1.0	1.0	1.0	1.0	1.0	1.0	1.0	1.0	1.0	1.0	1.0	1.0	1.0	1.0	1.0	1.0	1.0	1.0	1.0	1.0	1.0	1.0	1.0	1.0	1.0	1.0	1.0	1.0	1.0	1.0	1.0	1.0	1.0	1.0
BMR1A_ACR2A_BMP4	1.0	1.0	1.0	1.0	1.0	1.0	1.0	1.0	1.0	1.0	1.0	1.0	1.0	1.0	1.0	1.0	1.0	1.0	1.0	1.0	1.0	1.0	1.0	1.0	1.0	1.0	1.0	1.0	1.0	1.0	1.0	1.0	1.0	1.0	1.0	1.0	1.0	1.0	1.0	1.0	1.0	1.0	1.0	1.0	1.0	1.0	1.0	1.0	1.0
BMR1A_AVR2B_BMP4	1.0	1.0	1.0	1.0	1.0	1.0	1.0	1.0	1.0	1.0	1.0	1.0	1.0	1.0	1.0	1.0	1.0	1.0	1.0	1.0	1.0	1.0	1.0	1.0	1.0	1.0	1.0	1.0	1.0	1.0	1.0	1.0	1.0	1.0	1.0	1.0	1.0	1.0	1.0	1.0	1.0	1.0	1.0	1.0	1.0	1.0	1.0	1.0	1.0
BMPR1A_BMPR2_GDF7	1.0	1.0	1.0	1.0	1.0	1.0	1.0	1.0	1.0	1.0	1.0	1.0	1.0	1.0	1.0	1.0	1.0	1.0	1.0	1.0	1.0	1.0	1.0	1.0	1.0	1.0	1.0	1.0	1.0	1.0	1.0	1.0	1.0	1.0	1.0	1.0	1.0	1.0	1.0	1.0	1.0	1.0	1.0	1.0	1.0	1.0	1.0	1.0	1.0
BMR1A_ACR2A_GDF7	1.0	1.0	1.0	1.0	1.0	1.0	1.0	1.0	1.0	1.0	1.0	1.0	1.0	1.0	1.0	1.0	1.0	1.0	1.0	1.0	1.0	1.0	1.0	1.0	1.0	1.0	1.0	1.0	1.0	1.0	1.0	1.0	1.0	1.0	1.0	1.0	1.0	1.0	1.0	1.0	1.0	1.0	1.0	1.0	1.0	1.0	1.0	1.0	1.0
BMR1A_AVR2B_GDF7	1.0	1.0	1.0	1.0	1.0	1.0	1.0	1.0	1.0	1.0	1.0	1.0	1.0	1.0	1.0	1.0	1.0	1.0	1.0	1.0	1.0	1.0	1.0	1.0	1.0	1.0	1.0	1.0	1.0	1.0	1.0	1.0	1.0	1.0	1.0	1.0	1.0	1.0	1.0	1.0	1.0	1.0	1.0	1.0	1.0	1.0	1.0	1.0	1.0
ACVR_1B2A receptor_GDF11	1.0	1.0	1.0	1.0	1.0	1.0	1.0	1.0	1.0	1.0	1.0	1.0	1.0	1.0	1.0	1.0	1.0	1.0	1.0	1.0	1.0	1.0	1.0	1.0	1.0	1.0	1.0	1.0	1.0	1.0	1.0	1.0	1.0	1.0	1.0	1.0	1.0	1.0	1.0	1.0	1.0	1.0	1.0	1.0	1.0	1.0	1.0	1.0	1.0
ACVR_1B2B receptor_GDF11	1.0	1.0	1.0	1.0	1.0	1.0	1.0	1.0	1.0	1.0	1.0	1.0	1.0	1.0	1.0	1.0	1.0	1.0	1.0	1.0	1.0	1.0	1.0	1.0	1.0	1.0	1.0	1.0	1.0	1.0	1.0	1.0	1.0	1.0	1.0	1.0	1.0	1.0	1.0	1.0	1.0	1.0	1.0	1.0	1.0	1.0	1.0	1.0	1.0
ACVR_1B2B receptor_GDF10	1.0	1.0	1.0	1.0	1.0	1.0	1.0	1.0	1.0	1.0	1.0	1.0	1.0	1.0	1.0	1.0	1.0	1.0	1.0	1.0	1.0	1.0	1.0	1.0	1.0	1.0	1.0	1.0	1.0	1.0	1.0	1.0	1.0	1.0	1.0	1.0	1.0	1.0	1.0	1.0	1.0	1.0	1.0	1.0	1.0	1.0	1.0	1.0	1.0
CD8 receptor_LCK	1.0	1.0	1.0	1.0	1.0	1.0	1.0	1.0	1.0	1.0	1.0	1.0	1.0	1.0	1.0	1.0	1.0	1.0	1.0	1.0	1.0	1.0	1.0	1.0	1.0	1.0	1.0	1.0	1.0	1.0	1.0	1.0	1.0	1.0	1.0	1.0	1.0	1.0	1.0	1.0	1.0	1.0	1.0	1.0	1.0	1.0	1.0	1.0	1.0
CD94:NKG2A_HLA-E	1.0	1.0	1.0	1.0	1.0	1.0	1.0	1.0	1.0	1.0	1.0	1.0	1.0	1.0	1.0	1.0	1.0	1.0	1.0	1.0	1.0	1.0	1.0	1.0	1.0	1.0	1.0	1.0	1.0	1.0	1.0	1.0	1.0	1.0	1.0	1.0	1.0	1.0	1.0	1.0	1.0	1.0	1.0	1.0	1.0	1.0	1.0	1.0	1.0
CD94:NKG2C_HLA-E	1.0	1.0	1.0	1.0	1.0	1.0	1.0	1.0	1.0	1.0	1.0	1.0	1.0	1.0	1.0	1.0	1.0	1.0	1.0	1.0	1.0	1.0	1.0	1.0	1.0	1.0	1.0	1.0	1.0	1.0	1.0	1.0	1.0	1.0	1.0	1.0	1.0	1.0	1.0	1.0	1.0	1.0	1.0	1.0	1.0	1.0	1.0	1.0	1.0
CD94:NKG2E_HLA-E	1.0	1.0	1.0	1.0	1.0	1.0	1.0	1.0	1.0	1.0	1.0	1.0	1.0	1.0	1.0	1.0	1.0	1.0	1.0	1.0	1.0	1.0	1.0	1.0	1.0	1.0	1.0	1.0	1.0	1.0	1.0	1.0	1.0	1.0	1.0	1.0	1.0	1.0	1.0	1.0	1.0	1.0	1.0	1.0	1.0	1.0	1.0	1.0	1.0
CNTF-1R_CLCF1	1.0	1.0	1.0	1.0	1.0	1.0	1.0	1.0	1.0	1.0	1.0	1.0	1.0	1.0	1.0	1.0	1.0	1.0	1.0	1.0	1.0	1.0	1.0	1.0	1.0	1.0	1.0	1.0	1.0	1.0	1.0	1.0	1.0	1.0	1.0	1.0	1.0	1.0	1.0	1.0	1.0	1.0	1.0	1.0	1.0	1.0	1.0	1.0	1.0
ICAM1_aLb2 complex	1.0	1.0	1.0	1.0	1.0	1.0	1.0	1.0	1.0	1.0	1.0	1.0	1.0	1.0	1.0	1.0	1.0	1.0	1.0	1.0	1.0	1.0	1.0	1.0	1.0	1.0	1.0	1.0	1.0	1.0	1.0	1.0	1.0	1.0	1.0	1.0	1.0	1.0	1.0	1.0	1.0	1.0	1.0	1.0	1.0	1.0	1.0	1.0	1.0
ICAM2_aLb2 complex	1.0	1.0	1.0	1.0	1.0	1.0	1.0	1.0	1.0	1.0	1.0	1.0	1.0	1.0	1.0	1.0	1.0	1.0	1.0	1.0	1.0	1.0	1.0	1.0	1.0	1.0	1.0	1.0	1.0	1.0	1.0	1.0	1.0	1.0	1.0	1.0	1.0	1.0	1.0	1.0	1.0	1.0	1.0	1.0	1.0	1.0	1.0	1.0	1.0
ICAM3_aLb2 complex	1.0	1.0	1.0	1.0	1.0	1.0	1.0	1.0	1.0	1.0	1.0	1.0	1.0	1.0	1.0	1.0	1.0	0.0	1.0	1.0	1.0	1.0	1.0	1.0	1.0	1.0	1.0	1.0	0.0	1.0	1.0	1.0	1.0	1.0	1.0	0.0	1.0	1.0	1.0	1.0	1.0	1.0	1.0	1.0	1.0	1.0	1.0	1.0	1.0
ICAM4_aLb2 complex	1.0	1.0	1.0	1.0	1.0	1.0	1.0	1.0	1.0	1.0	1.0	1.0	1.0	1.0	1.0	1.0	1.0	1.0	1.0	1.0	1.0	1.0	1.0	1.0	1.0	1.0	1.0	1.0	1.0	1.0	1.0	1.0	1.0	1.0	1.0	1.0	1.0	1.0	1.0	1.0	1.0	1.0	1.0	1.0	1.0	1.0	1.0	1.0	1.0
F11R_aLb2 complex	1.0	1.0	1.0	1.0	1.0	1.0	1.0	1.0	1.0	1.0	1.0	1.0	1.0	1.0	1.0	1.0	1.0	1.0	1.0	1.0	1.0	1.0	1.0	1.0	1.0	1.0	1.0	1.0	1.0	1.0	1.0	1.0	1.0	1.0	1.0	1.0	1.0	1.0	1.0	1.0	1.0	1.0	1.0	1.0	1.0	1.0	1.0	1.0	1.0
IL1 receptor_IL1B	1.0	1.0	1.0	1.0	1.0	1.0	1.0	1.0	1.0	1.0	1.0	1.0	1.0	1.0	1.0	1.0	1.0	1.0	1.0	1.0	1.0	1.0	1.0	1.0	1.0	1.0	1.0	1.0	1.0	1.0	1.0	1.0	1.0	1.0	1.0	1.0	1.0	1.0	1.0	1.0	1.0	1.0	1.0	1.0	1.0	1.0	1.0	1.0	1.0
IL1 receptor inhibitor_IL1B	1.0	1.0	1.0	1.0	1.0	1.0	1.0	1.0	1.0	1.0	1.0	1.0	1.0	1.0	1.0	1.0	1.0	1.0	1.0	1.0	1.0	1.0	1.0	1.0	1.0	1.0	1.0	1.0	1.0	1.0	1.0	1.0	1.0	1.0	1.0	1.0	1.0	1.0	1.0	1.0	1.0	1.0	1.0	1.0	1.0	1.0	1.0	1.0	1.0
IL1 receptor_IL1RN	1.0	1.0	1.0	1.0	1.0	1.0	1.0	1.0	1.0	1.0	1.0	1.0	1.0	1.0	1.0	1.0	1.0	1.0	1.0	1.0	1.0	1.0	1.0	1.0	1.0	1.0	1.0	1.0	1.0	1.0	1.0	1.0	1.0	1.0	1.0	1.0	1.0	1.0	1.0	1.0	1.0	1.0	1.0	1.0	1.0	1.0	1.0	1.0	1.0
IL1 receptor inhibitor_IL1RN	1.0	1.0	1.0	1.0	1.0	1.0	1.0	1.0	1.0	1.0	1.0	1.0	1.0	1.0	1.0	1.0	1.0	1.0	1.0	1.0	1.0	1.0	1.0	1.0	1.0	1.0	1.0	1.0	1.0	1.0	1.0	1.0	1.0	1.0	1.0	1.0	1.0	1.0	1.0	1.0	1.0	1.0	1.0	1.0	1.0	1.0	1.0	1.0	1.0
IL10 receptor_IL10	1.0	1.0	1.0	1.0	1.0	1.0	1.0	1.0	1.0	1.0	1.0	1.0	1.0	1.0	1.0	1.0	1.0	1.0	1.0	1.0	1.0	1.0	1.0	1.0	1.0	1.0	1.0	1.0	1.0	1.0	1.0	1.0	1.0	1.0	1.0	1.0	1.0	1.0	1.0	1.0	1.0	1.0	1.0	1.0	1.0	1.0	1.0	1.0	1.0
IL15 receptor_IL15	1.0	1.0	1.0	1.0	1.0	1.0	1.0	1.0	1.0	1.0	1.0	1.0	1.0	1.0	1.0	1.0	1.0	1.0	1.0	1.0	1.0	1.0	1.0	1.0	1.0	1.0	1.0	1.0	1.0	1.0	1.0	1.0	1.0	1.0	1.0	1.0	1.0	1.0	1.0	1.0	1.0	1.0	1.0	1.0	1.0	1.0	1.0	1.0	1.0
IL18 receptor_IL18	1.0	1.0	1.0	1.0	1.0	1.0	1.0	1.0	1.0	1.0	1.0	1.0	1.0	1.0	1.0	1.0	1.0	1.0	1.0	1.0	1.0	1.0	1.0	1.0	1.0	1.0	1.0	1.0	1.0	1.0	1.0	1.0	1.0	1.0	1.0	1.0	1.0	1.0	1.0	1.0	1.0	1.0	1.0	1.0	1.0	1.0	1.0	1.0	1.0
IL6 receptor_IL6	1.0	1.0	1.0	1.0	1.0	1.0	1.0	1.0	1.0	1.0	1.0	1.0	1.0	1.0	1.0	1.0	1.0	1.0	1.0	1.0	1.0	1.0	1.0	1.0	1.0	1.0	1.0	1.0	1.0	1.0	1.0	1.0	1.0	1.0	1.0	1.0	1.0	1.0	1.0	1.0	1.0	1.0	1.0	1.0	1.0	1.0	1.0	1.0	1.0
IL7 receptor_IL7	1.0	1.0	1.0	1.0	1.0	1.0	1.0	1.0	1.0	1.0	1.0	1.0	1.0	1.0	1.0	1.0	1.0	1.0	1.0	1.0	1.0	1.0	1.0	1.0	1.0	1.0	1.0	1.0	1.0	1.0	1.0	1.0	1.0	1.0	1.0	1.0	1.0	1.0	1.0	1.0	1.0	1.0	1.0	1.0	1.0	1.0	1.0	1.0	1.0
LIFR_OSM	1.0	1.0	1.0	1.0	1.0	1.0	1.0	1.0	1.0	1.0	1.0	1.0	1.0	1.0	1.0	1.0	1.0	1.0	1.0	1.0	1.0	1.0	1.0	1.0	1.0	1.0	1.0	1.0	1.0	1.0	1.0	1.0	1.0	1.0	1.0	1.0	1.0	1.0	1.0	1.0	1.0	1.0	1.0	1.0	1.0	1.0	1.0	1.0	1.0
OSMR_OSM	1.0	1.0	1.0	1.0	1.0	1.0	1.0	1.0	1.0	1.0	1.0	1.0	1.0	1.0	1.0	1.0	1.0	1.0	1.0	1.0	1.0	1.0	1.0	1.0	1.0	1.0	1.0	1.0	1.0	1.0	1.0	1.0	1.0	1.0	1.0	1.0	1.0	1.0	1.0	1.0	1.0	1.0	1.0	1.0	1.0	1.0	1.0	1.0	1.0
GDF11_TGFR_AVR2A	1.0	1.0	1.0	1.0	1.0	1.0	1.0	1.0	1.0	1.0	1.0	1.0	1.0	1.0	1.0	1.0	1.0	1.0	1.0	1.0	1.0	1.0	1.0	1.0	1.0	1.0	1.0	1.0	1.0	1.0	1.0	1.0	1.0	1.0	1.0	1.0	1.0	1.0	1.0	1.0	1.0	1.0	1.0	1.0	1.0	1.0	1.0	1.0	1.0
GDF11_TGFR_AVR2B	1.0	1.0	1.0	1.0	1.0	1.0	1.0	1.0	1.0	1.0	1.0	1.0	1.0	1.0	1.0	1.0	1.0	1.0	1.0	1.0	1.0	1.0	1.0	1.0	1.0	1.0	1.0	1.0	1.0	1.0	1.0	1.0	1.0	1.0	1.0	1.0	1.0	1.0	1.0	1.0	1.0	1.0	1.0	1.0	1.0	1.0	1.0	1.0	1.0
TGFB1_TGFbeta receptor1	1.0	1.0	1.0	1.0	1.0	1.0	1.0	1.0	1.0	1.0	1.0	1.0	1.0	1.0	1.0	1.0	1.0	1.0	1.0	1.0	1.0	1.0	1.0	1.0	1.0	1.0	1.0	1.0	1.0	1.0	1.0	1.0	1.0	1.0	1.0	1.0	1.0	1.0	1.0	1.0	1.0	1.0	1.0	1.0	1.0	1.0	1.0	1.0	1.0
TGFB3_TGFbeta receptor1	1.0	1.0	1.0	1.0	1.0	1.0	1.0	1.0	1.0	1.0	1.0	1.0	1.0	1.0	1.0	1.0	1.0	1.0	1.0	1.0	1.0	1.0	1.0	1.0	1.0	1.0	1.0	1.0	1.0	1.0	1.0	1.0	1.0	1.0	1.0	1.0	1.0	1.0	1.0	1.0	1.0	1.0	1.0	1.0	1.0	1.0	1.0	1.0	1.0
TGFB1_TGFbeta receptor2	1.0	1.0	1.0	1.0	1.0	1.0	1.0	1.0	1.0	1.0	1.0	1.0	1.0	1.0	1.0	1.0	1.0	1.0	1.0	1.0	1.0	1.0	1.0	1.0	1.0	1.0	1.0	1.0	1.0	1.0	1.0	1.0	1.0	1.0	1.0	1.0	1.0	1.0	1.0	1.0	1.0	1.0	1.0	1.0	1.0	1.0	1.0	1.0	1.0
TGFB3_TGFbeta receptor2	1.0	1.0	1.0	1.0	1.0	1.0	1.0	1.0	1.0	1.0	1.0	1.0	1.0	1.0	1.0	1.0	1.0	1.0	1.0	1.0	1.0	1.0	1.0	1.0	1.0	1.0	1.0	1.0	1.0	1.0	1.0	1.0	1.0	1.0	1.0	1.0	1.0	1.0	1.0	1.0	1.0	1.0	1.0	1.0	1.0	1.0	1.0	1.0	1.0
GDF9_TGFR_BMPR2	1.0	1.0	1.0	1.0	1.0	1.0	1.0	1.0	1.0	1.0	1.0	1.0	1.0	1.0	1.0	1.0	1.0	1.0	1.0	1.0	1.0	1.0	1.0	1.0	1.0	1.0	1.0	1.0	1.0	1.0	1.0	1.0	1.0	1.0	1.0	1.0	1.0	1.0	1.0	1.0	1.0	1.0	1.0	1.0	1.0	1.0	1.0	1.0	1.0
IFNG_Type II IFNR	1.0	1.0	1.0	1.0	1.0	1.0	1.0	1.0	1.0	1.0	1.0	1.0	1.0	1.0	1.0	1.0	1.0	1.0	1.0	1.0	1.0	1.0	1.0	1.0	1.0	1.0	1.0	1.0	1.0	1.0	1.0	1.0	1.0	1.0	1.0	1.0	1.0	1.0	1.0	1.0	1.0	1.0	1.0	1.0	1.0	1.0	1.0	1.0	1.0
PDGFR complex_PDGFD	1.0	1.0	1.0	1.0	1.0	1.0	1.0	1.0	1.0	1.0	1.0	1.0	1.0	1.0	1.0	1.0	1.0	1.0	1.0	1.0	1.0	1.0	1.0	1.0	1.0	1.0	1.0	1.0	1.0	1.0	1.0	1.0	1.0	1.0	1.0	1.0	1.0	1.0	1.0	1.0	1.0	1.0	1.0	1.0	1.0	1.0	1.0	1.0	1.0
ARTN_RET receptor 1	1.0	1.0	1.0	1.0	1.0	1.0	1.0	1.0	1.0	1.0	1.0	1.0	1.0	1.0	1.0	1.0	1.0	1.0	1.0	1.0	1.0	1.0	1.0	1.0	1.0	1.0	1.0	1.0	1.0	1.0	1.0	1.0	1.0	1.0	1.0	1.0	1.0	1.0	1.0	1.0	1.0	1.0	1.0	1.0	1.0	1.0	1.0	1.0	1.0
CD47_SIRB1 complex	1.0	1.0	1.0	1.0	1.0	1.0	1.0	1.0	1.0	1.0	1.0	1.0	1.0	1.0	1.0	1.0	1.0	1.0	1.0	1.0	0.0	1.0	1.0	1.0	1.0	1.0	1.0	1.0	1.0	1.0	1.0	1.0	1.0	1.0	1.0	0.004	0.0	1.0	1.0	1.0	1.0	1.0	1.0	1.0	1.0	1.0	1.0	1.0	1.0
[truncated: 1,715 more columns]

## Sheet: significant_means
interacting_pair	0|0	0|1	0|2	0|3	0|4	0|5	0|6	0|7	0|8	0|9	0|10	0|11	0|12	0|13	0|14	0|15	0|16	0|17	0|18	0|19	0|20	0|21	0|22	0|23	0|24	0|25	0|26	0|27	0|28	0|29	0|30	0|31	0|32	0|33	0|34	0|35	0|36	0|37	0|38	0|39	0|40	0|41	1|0	1|1	1|2	1|3	1|4	1|5	1|6
JAM3_aMb2 complex
CD226_NECTIN2
FCER2_aMb2 complex
COL1A1_a1b1 complex
COL8A1_a10b1 complex
COL8A2_a1b1 complex
COL8A1_a1b1 complex
TIGIT_NECTIN2
COL8A2_a10b1 complex
COL1A1_a10b1 complex
THBS1_a2Bb3 complex
COL16A1_a1b1 complex
COL13A1_a1b1 complex
COL12A1_a1b1 complex
FGFR3_NECTIN1
ESAM_ESAM
GP1BA_aMb2 complex
JAM3_JAM3
COL12A1_a10b1 complex
CCL4L2_VSIR
CEACAM1_CEACAM8
CEACAM6_CEACAM6
CEACAM8_CEACAM6
CEACAM1_CEACAM6
COL16A1_a10b1 complex
COL13A1_a10b1 complex
OSMR_OSM
CD96_NECTIN1
IL18 receptor_IL18
COL18A1_a10b1 complex
CADM1_CADM1
COL6A3_a10b1 complex
SELP_CD34
PF4_CXCR3
PGRMC2_CCL4L2
IGF2_IGF1R
CD72_SEMA4D
CSF1R_IL34
ICAM2_aLb2 complex
FGF7_FGFR3
SELP_CD24
COL18A1_a1b1 complex
COL14A1_a10b1 complex
PDGFA_PDGFRA
SELP_SELPLG
COL3A1_a10b1 complex
FN1_a10b1 complex
LIFR_OSM
FN1_a2Bb3 complex
PDGFRA_PDGFC
CCL2_CCR2
COL6A1_a10b1 complex
COL6A2_a10b1 complex
PECAM1_CD38
COL1A2_a10b1 complex
CD1D_LILRB2
SEMA4A_PLXND1
TNFRSF11B_TNFSF10
COL6A3_a1b1 complex
CSF1_SIRPA
FCER2_aXb2 complex
BTLA_TNFRSF14
COL14A1_a1b1 complex
TGFB1_TGFBR3
GRN_SORT1										0.247
COL3A1_a1b1 complex
COL6A1_a1b1 complex
MDK_SORL1
COL6A2_a1b1 complex
TNFRSF13B_TNFSF13B
TNFRSF13C_TNFSF13B
NRP2_PGF
CD52_SIGLEC10																													0.256
PLXNB2_SEMA4D
LGALS9_COLEC12
HLA-DRB1_OGN																														0.516
COL1A2_a1b1 complex
CSF1R_CSF1
ALOX5_ALOX5AP
PTPRC_CD22																																			0.234
CLEC2B_KLRF1
CXCL12_CXCR3
FGFR1_NCAM1
FN1_a4b7 complex
VCAM1_a4b7 complex
EPOR_KITLG
COPA_SORT1										0.094
HLA-E_KLRC1																		0.103
CD94:NKG2A_HLA-E
SIRPA_CD47
CD40_TNFSF13B
LGALS9_SORL1
CD46_JAG1																														0.101
LAIR1_LILRB4	0.216																				0.144	0.175			0.187																		0.185
NRP1_PGF				0.163		0.173	0.118		0.106								0.181							0.116						0.12									0.091
FGFR1_FGF7
SPP1_a4b1 complex
HGF_CD44
SPP1_CD44
CD44_HBEGF
SELL_CD34		0.22						0.228			0.218
MDK_LRP1
NRP1_VEGFB	0.253			0.106		0.087	0.117		0.073								0.085			0.086	0.124	0.151		0.118	0.125					0.101					0.105
CD47_SIRB1 complex																					0.1															0.105	0.105
LAMP1_VSTM1
HLA-F_LILRB2																													0.253								0.117						0.118
ICAM3_aLb2 complex																		0.138											0.131							0.157
TNC_a4b1 complex
TNFRSF17_TNFSF13B
MIF_TNFRSF14
LGALS9_LRP1																																														0.203		0.192	0.116
SELL_SELPLG	0.313																	0.243			0.269				0.249				0.258							0.216	0.21
TNFRSF1B_GRN
LGALS9_SLC1A5																																											0.116			0.112		0.105
CD55_ADGRE5																		0.136	0.093		0.093				0.1				0.168							0.126	0.087
VCAM1_a4b1 complex
FN1_a4b1 complex
TNFRSF1A_GRN
LILRA4_BST2	0.513	0.412	0.413	0.514	0.392	0.51	0.518	0.504	0.506		0.488	0.456	0.391	0.398		0.385	0.521	0.476	0.462	0.496	0.472	0.445	0.388	0.405	0.445		0.422		0.49	0.447	0.4	0.438	0.379		0.419	0.5	0.48	0.545	0.413	0.387	0.455
TFRC_TNFSF13B
CXCL12_CXCR4
PLAUR_a4b1 complex
CD74_MIF			1.322	1.301				1.354			1.321	1.306								1.34				1.352			1.345	1.342				1.427	1.346									1.301			1.171	1.151
HLA-DPB1_TNFSF13B	0.51						0.499	0.52	0.559	0.497	0.532								0.613	0.635	0.566				0.528				0.564			0.575				0.531	0.63	0.566			0.549		0.567						0.556
LGALS9_CD44
CD74_APP	1.616			1.527		1.451	1.449		1.385	1.379							1.507		1.304		1.422	1.47			1.513					1.351						1.3		1.329	1.477	1.321			1.465			1.377		1.301	1.299
LGALS9_CD47																																											0.123	0.121	0.14	0.135		0.114	0.139
CD74_COPA	1.316	1.296						1.297	1.302			1.299				1.295	1.3	1.294	1.316	1.307	1.335	1.297			1.325		1.323		1.303	1.298			1.298			1.305	1.309	1.323	1.315	1.338	1.306	1.309	1.165	1.146
COL10A1_a10b1 complex
COL7A1_a10b1 complex
TG_ASGR1
COL4A4_a10b1 complex
IL1B_ADRB2
TNFRSF8_TNFSF8
ANXA1_FPR1
ANXA1_FPR3
COL15A1_a10b1 complex
ANXA1_FPR2
APP_FPR2
TNFSF9_ADGRG5
CD2_CD58
C5_C5AR2
CX3CR1_CX3CL1
AGT_AGTR1
PROS1_AXL
ADORA2B_ENTPD1
C3_C3AR1
NAMPT_P2RY6
COL9A3_a10b1 complex
COL9A2_a10b1 complex
COPA_P2RY6
LRP6_CKLF
CMKLR1_RARRES2
LGR4_RSPO3
PLXNC1_SEMA7A
FZD6_WNT5A
VEGFA_EPHB2
C5_C5AR1
PROS1_TYRO3
DSC2_DSG2
CD6_ALCAM
COL6A6_a10b1 complex
FPR2_CAMP
FPR3_HEBP1
TNFSF4_TNFRSF4
PECAM1_CD177
COL4A1_a10b1 complex
VSTM1_ADGRG3
AXL_IL15RA
IL15_IL15RA
AXL_GAS6
GPR19_ENHO
TYRO3_GAS6
SPN_SIGLEC1
COL5A2_a10b1 complex
COL5A3_a10b1 complex
NPR2_NPPC
COL4A2_a10b1 complex
COL11A1_a10b1 complex
NPR3_NPPC
CD47_SIRPG
MERTK_GAS6
NMU_NMUR1
COL11A2_a10b1 complex
COL5A1_a10b1 complex
LRP1_ERFE
HLA-E_KLRC2
KIT_KITLG
PDGFRB_PDGFD
CD48_CD244
BMP8B_PLAUR
IL16_GRIN2C
FLT3_FLT3LG
COL7A1_a1b1 complex
COL24A1_a10b1 complex
BMR1A_AVR2B_BMP4
BMR1A_ACR2A_BMP4
BMPR1A_BMPR2_BMP4
BMR1A_AVR2B_BMP2
BMR1A_ACR2A_BMP2
BMPR1A_BMPR2_BMP2
ACVR_1C2B receptor_INHBB
ACVR_1C2A receptor_INHBB
ACVR_1B2B receptor_INHBB
ACVR_1B2A receptor_INHBB
ACVR_1A2B receptor_INHBB
ACVR_1A2A receptor_INHBB
ACVR_1C2B receptor_INHBA
ACVR_1C2A receptor_INHBA
ACVR_1B2B receptor_INHBA
ACVR_1B2A receptor_INHBA
ACVR_1A2B receptor_INHBA
ACVR_1A2A receptor_INHBA
BMR1A_AVR2B_BMP8A
BMR1A_ACR2A_BMP8A
BMPR1A_BMPR2_BMP8A
ACVR_1A2B receptor_BMP8A
ACVR_1A2A receptor_BMP8A
ACVR1_BMPR2_BMP8A
BMR1A_AVR2B_BMP6
BMPR1A_BMPR2_GDF7
BMR1A_ACR2A_GDF7
BMR1A_AVR2B_GDF7
ACVR_1B2A receptor_GDF11
PDGFR complex_PDGFD
IFNG_Type II IFNR
GDF9_TGFR_BMPR2
TGFB3_TGFbeta receptor2
TGFB1_TGFbeta receptor2
TGFB3_TGFbeta receptor1
TGFB1_TGFbeta receptor1
GDF11_TGFR_AVR2B
GDF11_TGFR_AVR2A
IL7 receptor_IL7
IL6 receptor_IL6
IL15 receptor_IL15
BMR1A_ACR2A_BMP6
IL10 receptor_IL10
IL1 receptor_IL1RN
IL1 receptor inhibitor_IL1B
IL1 receptor_IL1B
F11R_aLb2 complex
ICAM4_aLb2 complex
ICAM1_aLb2 complex
CNTF-1R_CLCF1
CD94:NKG2E_HLA-E
CD94:NKG2C_HLA-E
CD8 receptor_LCK
ACVR_1B2B receptor_GDF10
ACVR_1B2B receptor_GDF11
IL1 receptor inhibitor_IL1RN
COL19A1_a10b1 complex
BMPR1A_BMPR2_BMP6
ACVR_1A2A receptor_BMP6
COL21A1_a1b1 complex
COL26A1_a1b1 complex
COL27A1_a1b1 complex
COL28A1_a1b1 complex
COL24A1_a1b1 complex
COL19A1_a1b1 complex
COL9A2_a1b1 complex
COL9A3_a1b1 complex
COL10A1_a1b1 complex
VEGFA_FLT1
COL4A4_a1b1 complex
COL15A1_a1b1 complex
COL5A3_a1b1 complex
COL5A1_a1b1 complex
COL11A2_a1b1 complex
COL11A1_a1b1 complex
COL4A2_a1b1 complex
COL5A2_a1b1 complex
COL4A1_a1b1 complex
COL6A6_a1b1 complex
COL17A1_a10b1 complex
COL21A1_a10b1 complex
COL26A1_a10b1 complex
COL27A1_a10b1 complex
COL28A1_a10b1 complex
COL17A1_a1b1 complex
SEMA7A_a1b1 complex
PLG_a2Bb3 complex
CD40LG_a2Bb3 complex
ACVR1_BMPR2_BMP6
BMR1A_AVR2B_BMP5
BMR1A_ACR2A_BMP5
BMPR1A_BMPR2_BMP5
ACVR_1A2B receptor_BMP5
ACVR_1A2A receptor_BMP5
ACVR1_BMPR2_BMP5
ICAM1_aXb2 complex
THY1_aXb2 complex
C3_aMb2 complex
ICAM1_aMb2 complex
THY1_aMb2 complex
ACVR_1A2B receptor_BMP6
VCAM1_a9b1 complex
SPP1_a9b1 complex
CDH1_aEb7 complex
LAMC1_a7b1 complex
LAMC1_a6b1 complex
FN1_aVb5 complex
FN1_aVb1 complex
TNC_a8b1 complex
FN1_a8b1 complex
FBN1_a5b1 complex
CD40LG_a5b1 complex
FN1_a5b1 complex
JAM2_a4b1 complex
TNC_a9b1 complex
HCRT_HCRTR2
HLA-DPA1_TNFSF9
TNFSF12_TNFRSF12A
CD200_CD200R1
ADIPOQ_CD200R1
IGF2_IGF2R
IGF1_IGF1R
CCL3_IDE
IGF2_IDE
CSF1_SLC7A1
CCL4_SLC7A1
CCL5_CCR5
CCL3_CCR5
CCL4_CCR5
HLA-G_LILRB1
HLA-F_LILRB1
HLA-G_LILRB2
HLA-B_KIR3DL2
HLA-F_KIR3DL2
TNF_VSIR
HLA-F_KIR3DL1
HLA-A_KIR3DL1
NRP2_SEMA3C
NRP2_SEMA3F
ADRB2_VEGFB
FLT1_VEGFB
FLT1_PGF
NRP2_VEGFA
NRP1_VEGFA
NTRK1_AIMP1
ADIPOQ_CLEC2D
NTRK1_NAMPT
FAM3C_CLEC2D
LGALS9_DAG1
NOTCH2_IL24
CD40_CD40LG
CD27_CD70
TNFRSF13B_CD70
TNFRSF13B_TNFSF13
ACKR3_CXCL12
DPP4_CXCL12
CCR7_CCL19
CCRL2_CCL19
CXCR3_CCL19
TNF_CELSR2
PTN_PTPRS
TNF_PTPRS
TNFSF10_RIPK1
LTA_RIPK1
TNF_RIPK1
LTA_TNFRSF1B
TNF_TNFRSF1B
TNFSF13_FAS
TNF_FAS
TNFSF13_TNFRSF1A
LTA_TNFRSF1A
TNF_TNFRSF1A
PLXNB2_SEMA4C
TNF_SEMA4C
DLL1_NOTCH1
TNF_NOTCH1
TNF_DAG1
NTRK1_GPI
FAS_FASLG
TNFRSF10B_FASLG
JAM2_JAM3
TGFB3_TGFBR3
SPP1_PTGER4
FGFR2_FGFR3
FGFR1_FGFR2
TIMP1_FGFR2
FGF7_FGFR2
CD44_FGFR2
CDH1_KLRG1
NECTIN1_CADM3
CADM3_EPB41L1
CADM3_CADM4
CRTAM_CADM1
CADM3_CADM1
NECTIN2_NECTIN3
TIGIT_NECTIN3
NECTIN1_NECTIN3
CADM1_NECTIN3
CADM3_NECTIN3
PVR_NECTIN3
PVR_TIGIT
PVR_CD226
PVR_CD96
GALR3_GAL
GALR2_GAL
HLA-DPA1_GAL
PVR_TNFSF9
FFAR2_FAM3C
HLA-C_FAM3C
LAMP1_FAM3C
KIR2DL3_FAM3C
TNFRSF1A_FASLG
ICAM1_ITGAL
ICAM1_SPN
EGFR_HBEGF
EGFR_EPGN
NTRK1_COPA
EGFR_COPA
NTRK1_GRN
EGFR_GRN
ICAM1_AREG
EGFR_AREG
EGFR_MIF
EGFR_TGFB1
NOTCH2_DLL3
EGFR_TGFA
HLA-DPB1_NRG1
EGFR_NRG1
FCGR2A_CXCL9
DPP4_CXCL9
CXCR3_CXCL9
KIR2DL3_CXCL9
ASGR2_ADIPOQ
HLA-C_KIR2DL1
HLA-C_KIR2DL3
FFAR2_TNF
FFAR2_CCL4L2
ADGRG5_FAM3C
CXADR_FAM3C
ADGRL1_NRG1
NOTCH1_DLL3
NOTCH4_DLL3
NOTCH1_WNT4
NRG1_LGR4
NRG1_MS4A4A
NRG1_NETO2
NRG1_LSR
EREG_EGFR
OXT_OXTR
AVP_OXTR
PODXL_SELL
IDE_CCL23
CCR1_CCL23
CCR1_CCL26
CCR2_CCL26
CCR10_CCL28
CCR1_CCL13
CCR2_CCL13
CCR5_CCL8
CCR1_CCL8
CCR2_CCL8
SCGB3A1_MARCO
POMC_MC1R
TNFRSF11B_TNFSF11
EFNA1_EPHA2
EFNA1_EPHA1
MIF_TNFRSF10D
TNFSF10_TNFRSF10D
CD70_TNFRSF17
TNFSF13_TNFRSF17
RSPO1_LGR4
RSPO1_LGR6
RSPO3_LGR6
TNFSF11_TNFRSF11A
TNFSF12_TNFRSF25
PTGIR_GHRL
TBXA2R_GHRL
ICAM3_CD209
CEACAM1_CD209
CSF1_CELSR3
EPHA2_EFNA4
EPHA1_EFNA4
EPHA2_EFNA3
EPHA1_EFNA3
EPHA2_EFNA5
EPHA1_EFNA5
EPHB2_EFNA5
CD160_TNFRSF14
EPHA4_EFNB3
EPHB4_EFNB3
EPHB3_EFNB3
EPHB2_EFNB3
EPHB6_EFNB3
EPHA4_EFNB1
EPHB1_EFNB1
EPHB4_EFNB1
EPHB3_EFNB1
EPHB2_EFNB1
ARTN_RET receptor 1
PLD2_ARF1
NCR3_NCR3LG1
NCR3_BAG6
EPHB1_EFNB3
CD70_GPRC5B
TNFSF14_TNFRSF14
LTA_TNFRSF14
WNT5A_FZD1
WNT4_FZD8
LGALS9_HAVCR2
WNT5A_PTPRK
LGALS9_PTPRK
SCT_VIPR1
CXCL3_CXCR2
PPBP_CXCR2
CXCL2_CXCR2
CXCL8_CXCR2
CXCL1_CXCR2
CXCL10_CXCR3
CXCL2_DPP4
CXCL10_DPP4
CCL3L1_DPP4
CCL2_CCR10
CCL8_ACKR1
CXCL8_ACKR1
CXCL1_ACKR1
PF4_ACKR1
CCL5_ACKR1
CCL2_ACKR1
CCL3L1_CCR1
CCL5_CCR1
CCL3_CCR1
NOTCH1_JAG1
FZD6_WNT4
WNT4_FZD1
WNT5A_FZD2
WNT5A_FZD5
WNT5A_ANTXR1
PLXNB1_SEMA4D
PLXNB2_PTN
DLL3_NOTCH3
SCGB3A1_NOTCH3
JAG1_NOTCH3
DLL1_NOTCH3
JAG1_NOTCH4
DLL1_NOTCH4
JAG1_NOTCH2
DLL1_NOTCH2
BMP2_SMO
WNT4_SMO
FGFR2_XPR1
TNFSF13_TNFRSF14
FGFR2_NECTIN1
FGFR3_EPHA4
EFNA5_EPHA4
EFNA4_EPHA4
EFNA3_EPHA4
EFNA1_EPHA4
FGFR2_EPHA4
FGFR1_KL
TNFRSF10C_TNFSF10
TNFRSF10B_TNFSF10
TNFRSF10A_TNFSF10
WNT5A_FZD3
WNT5A_ROR2
GDF11_ANTXR1
FGFR2_CD83
EPHB6_EFNB1
[truncated: 1,715 more columns]
