# Supplementary figures and images for: Identification of phenotypically, functionally, and anatomically distinct stromal niche populations in human bone marrow based on single-cell RNA sequencing
Source: eLife journal article supplement (doi:10.7554/elife.81656), 2023-03-06

Figure 4-figure supplement 1

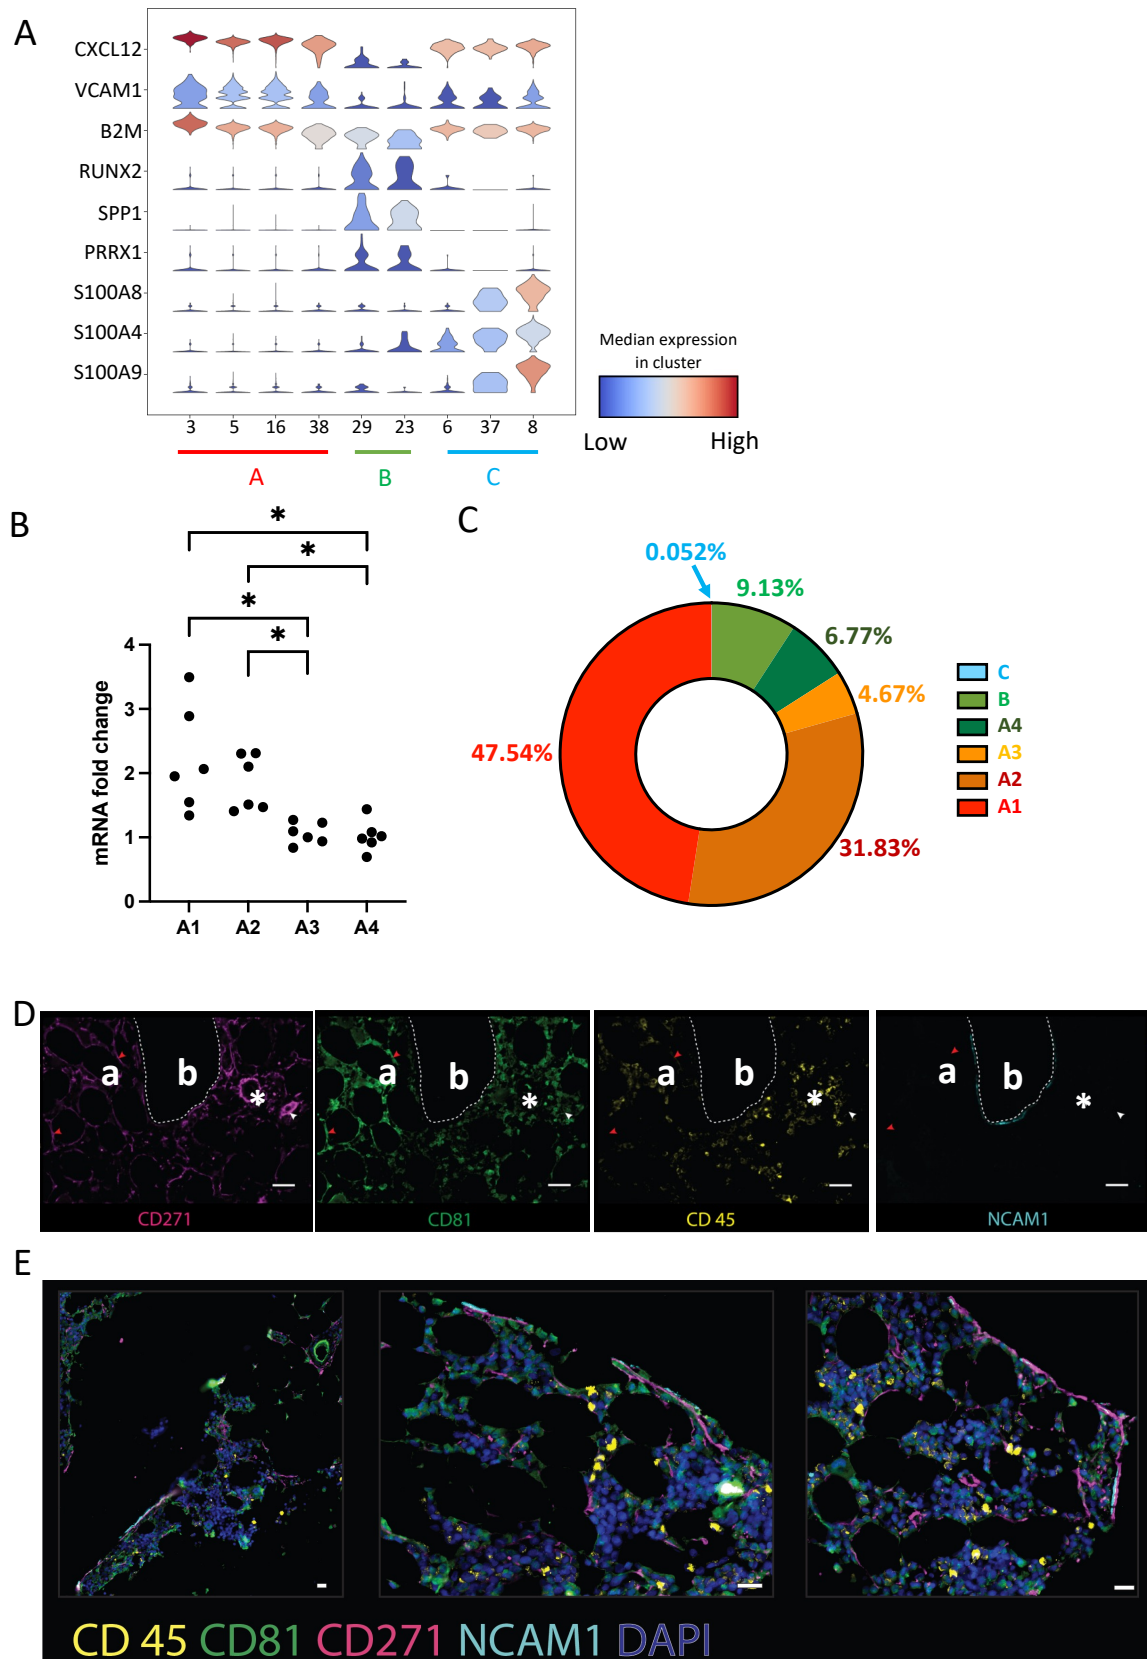

Supplement: supp [file elife-81656-supp-v1.zip]

Figure 4-figure supplement 12

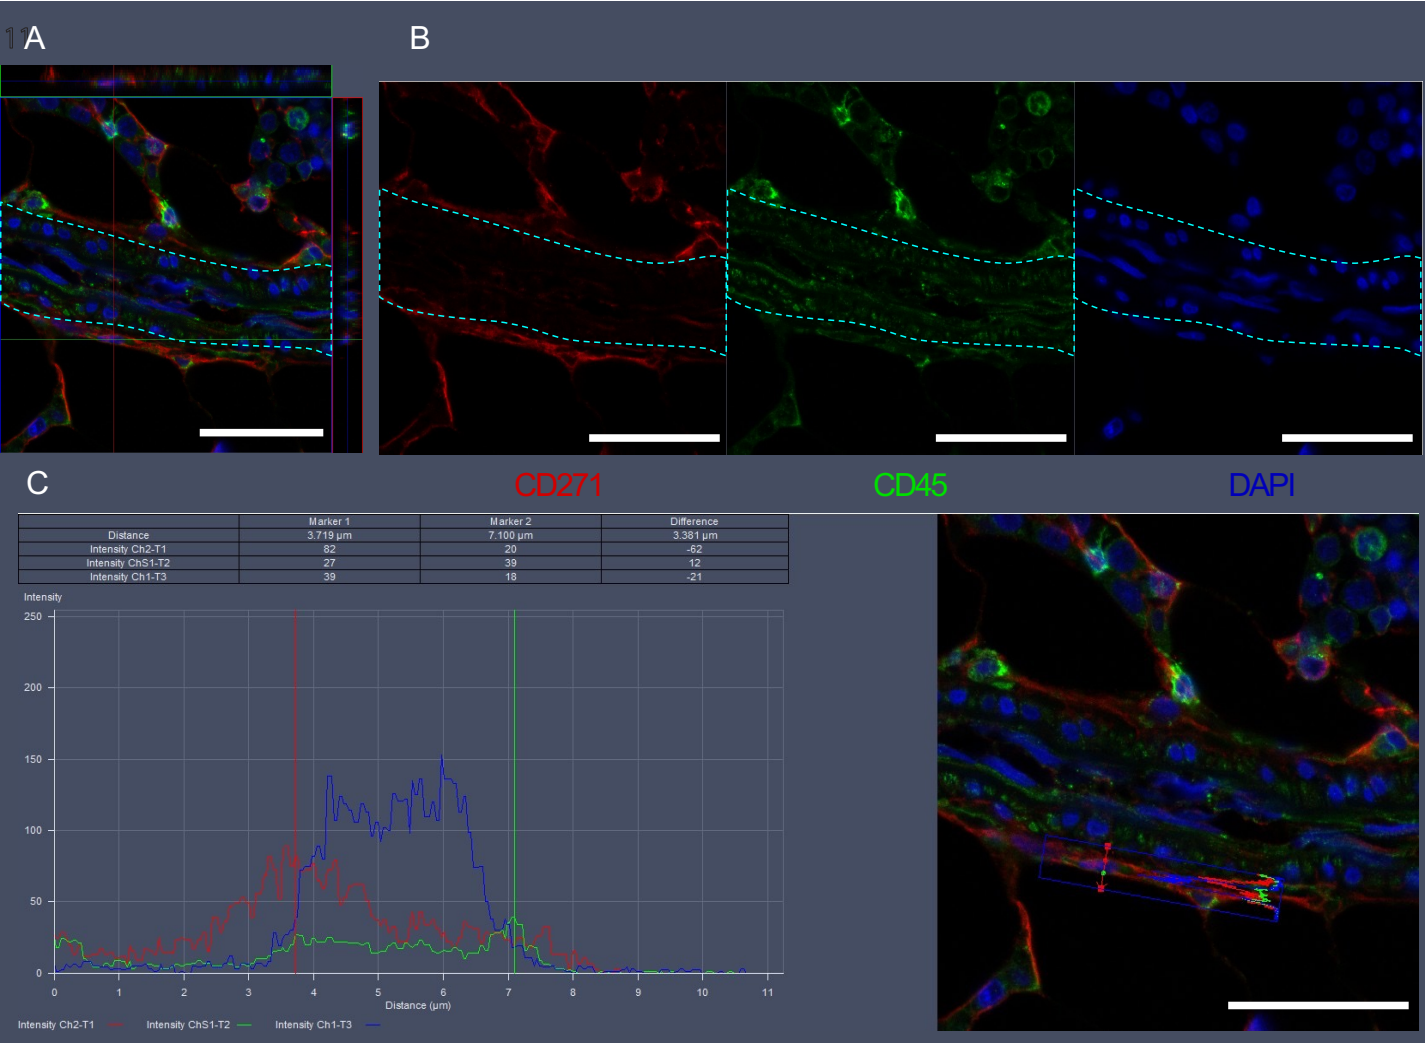

Supplement: supp [file elife-81656-supp-v1.zip]

Figure 4-figure supplement 11

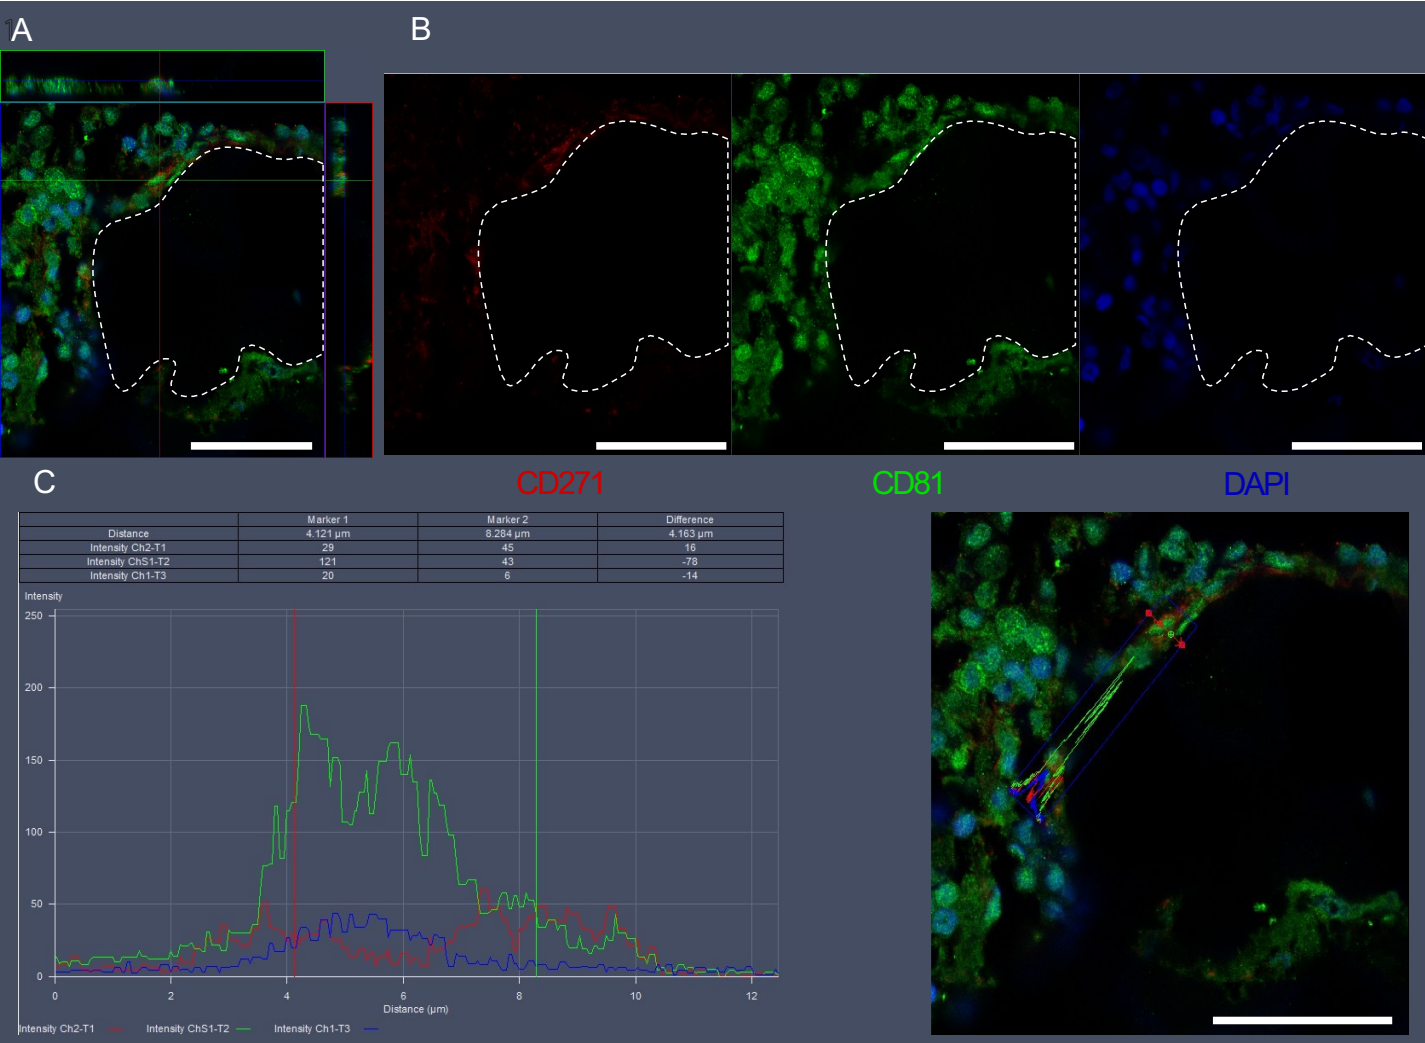

Supplement: supp [file elife-81656-supp-v1.zip]

Figure 1- figure supplement 1

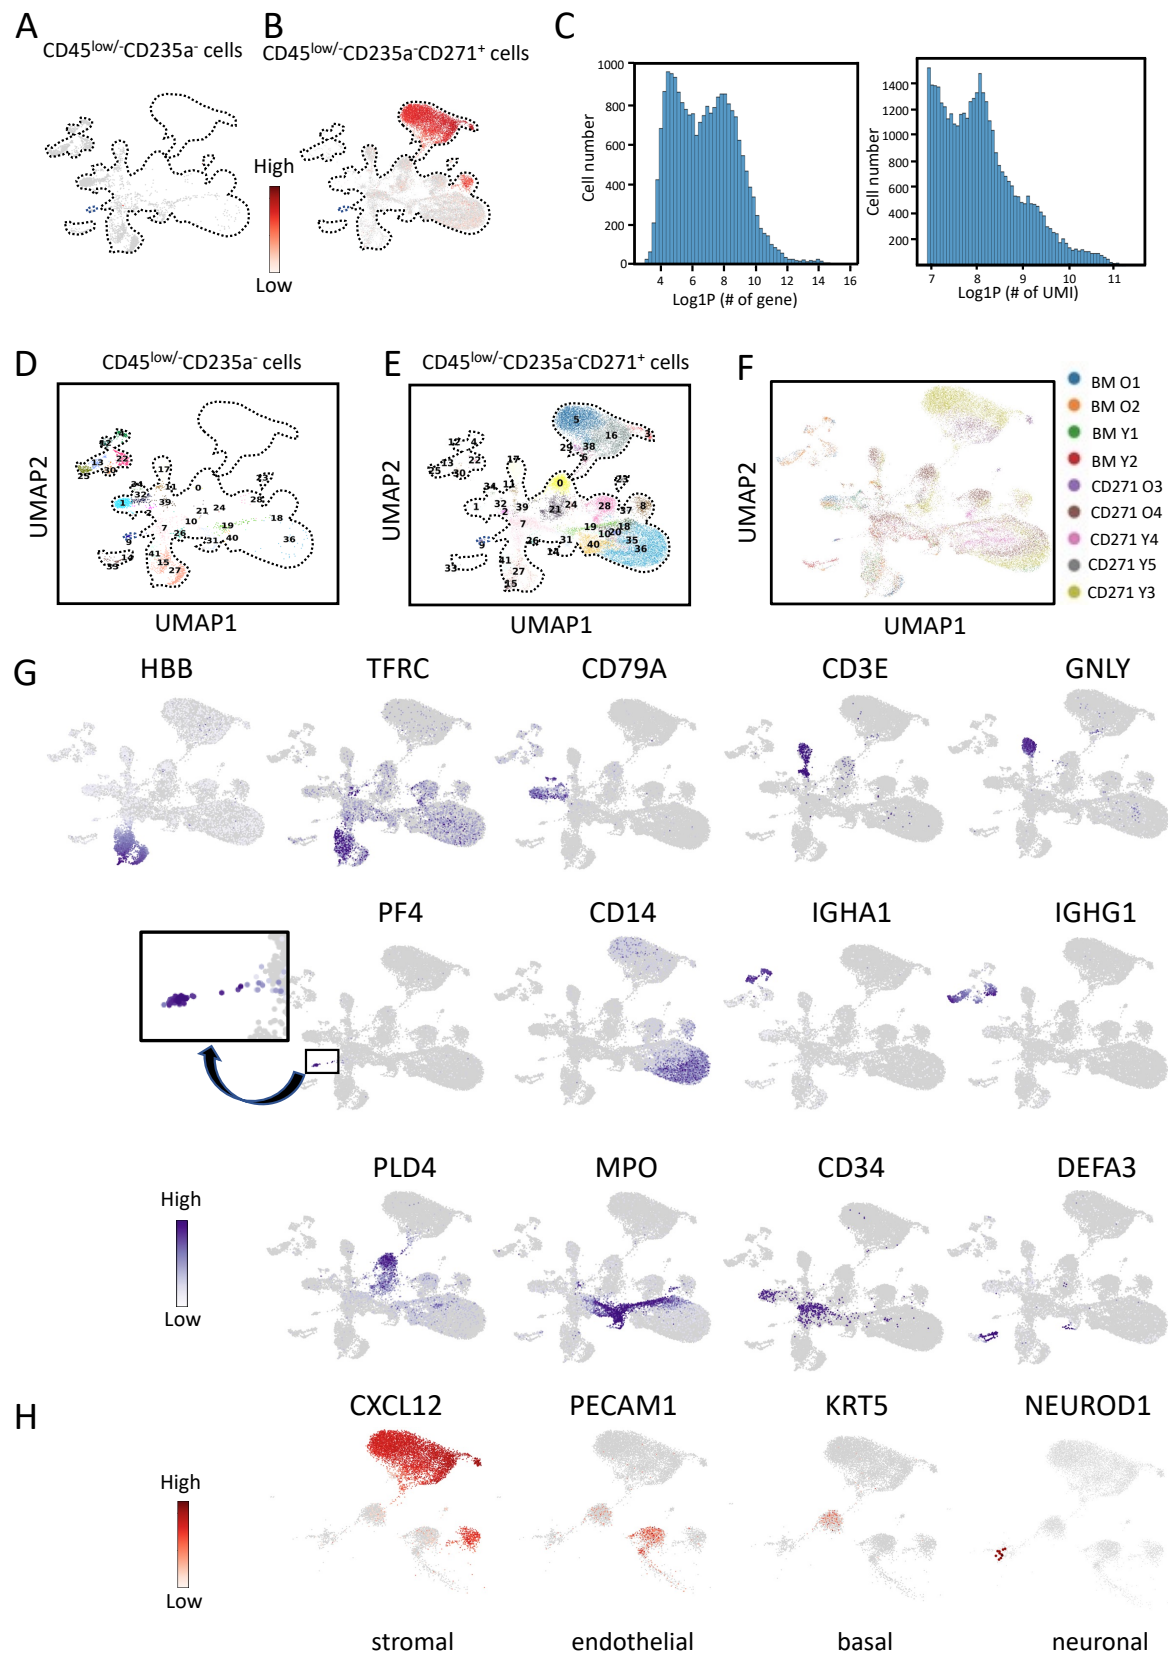

Supplement: supp [file elife-81656-supp-v1.zip › elife_poa_e81656_Figure_1_figure_supplement_1.pdf]

Figure 2-figure supplement 1

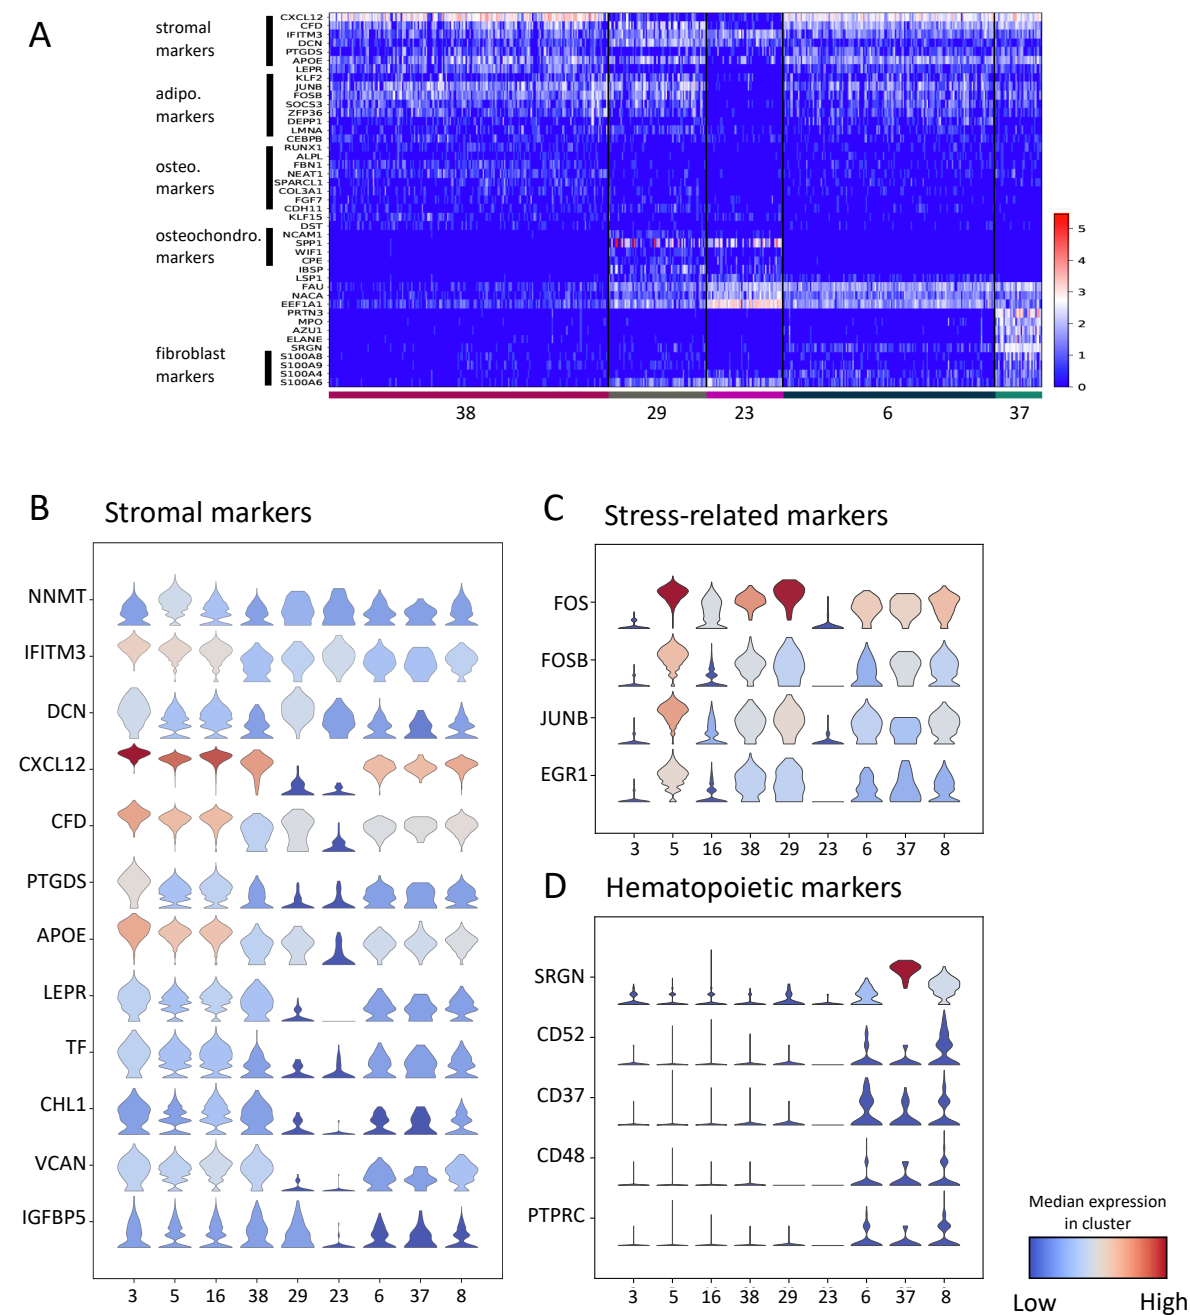

Supplement: supp [file elife-81656-supp-v1.zip › elife_poa_e81656_Figure_2_figure_supplement_1.pdf]

Figure 3-figure supplement 1

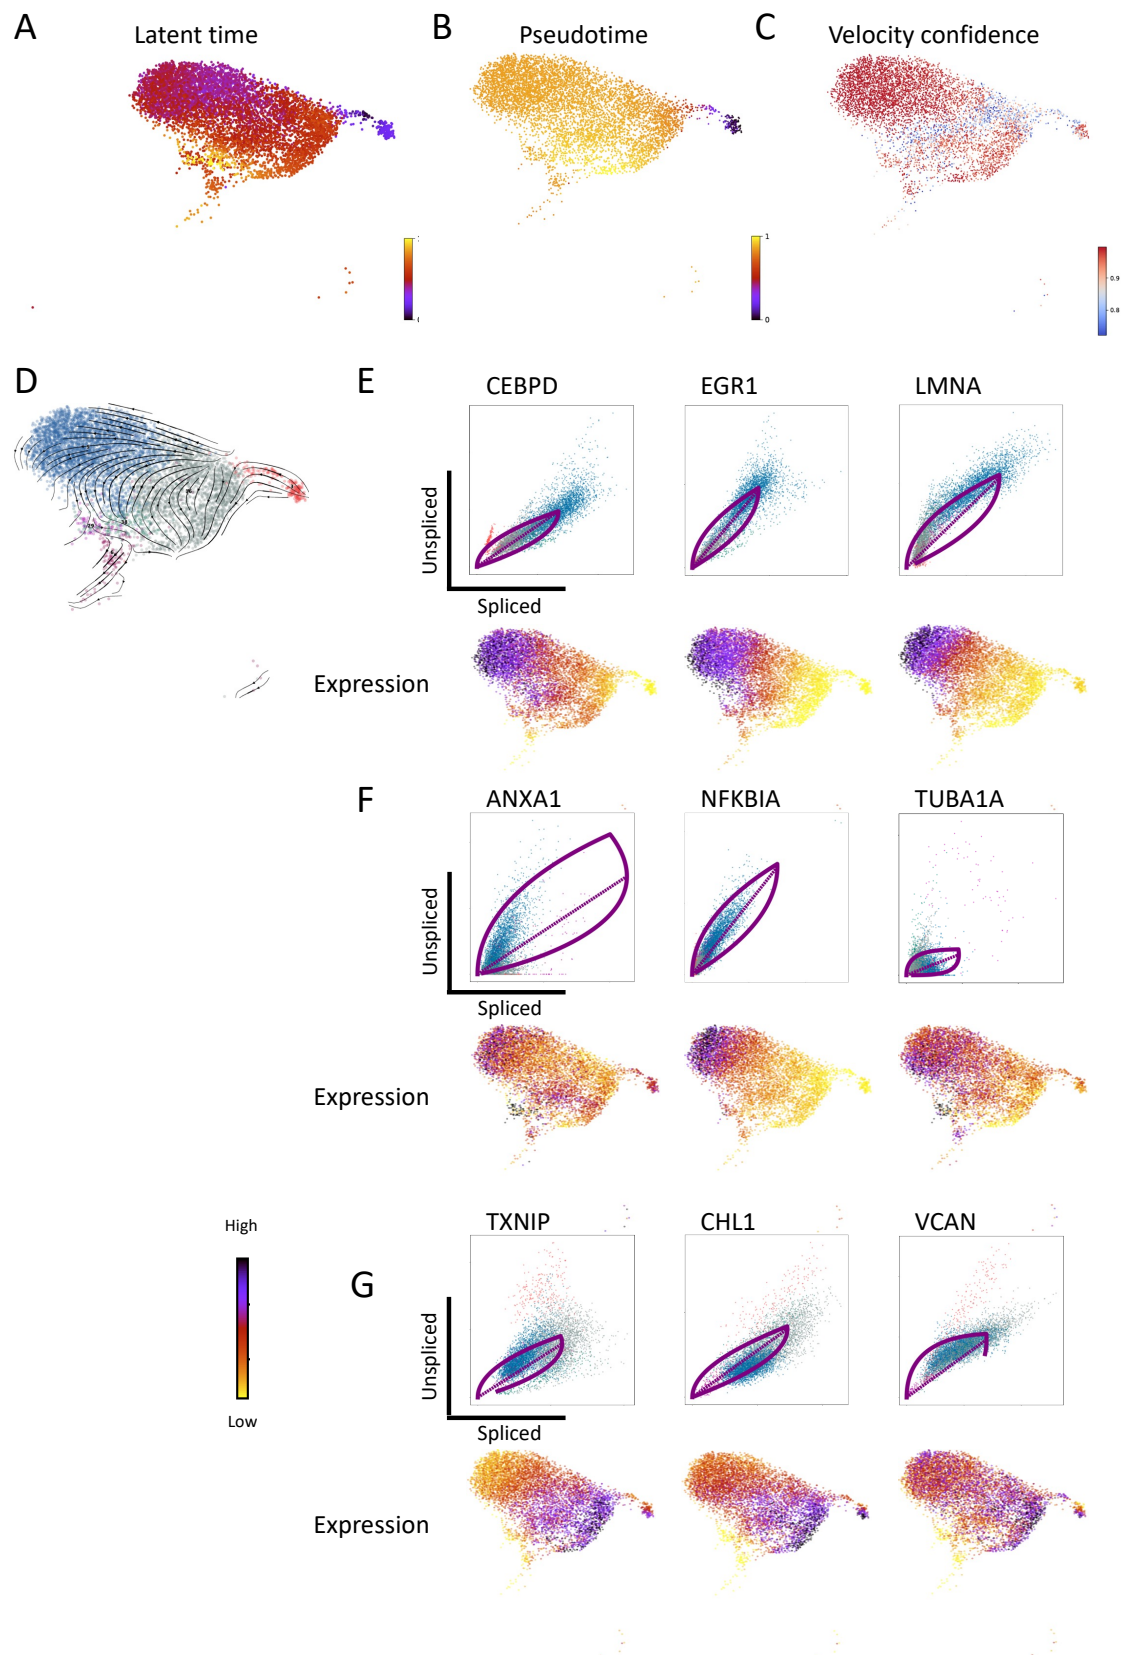

Supplement: supp [file elife-81656-supp-v1.zip › elife_poa_e81656_Figure_3_figure_supplement_1.pdf]

Figure 4-figure supplement 2

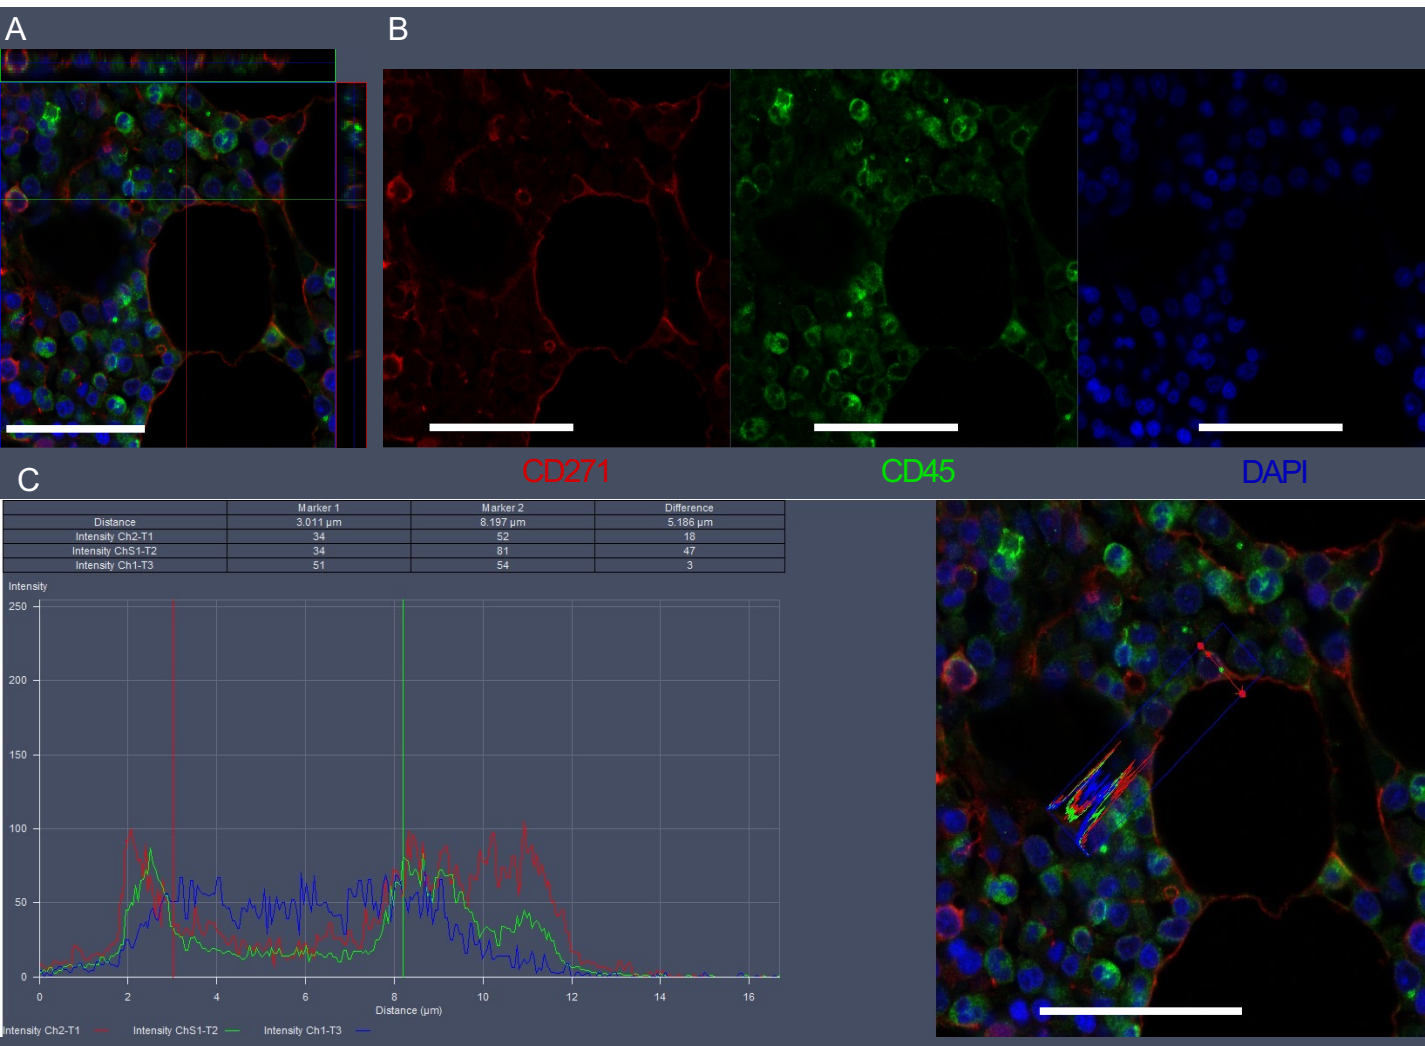

Supplement: supp [file elife-81656-supp-v1.zip › elife_poa_e81656_Figure_4_figure_supplement_2.pdf]

Figure 4-figure supplement 3

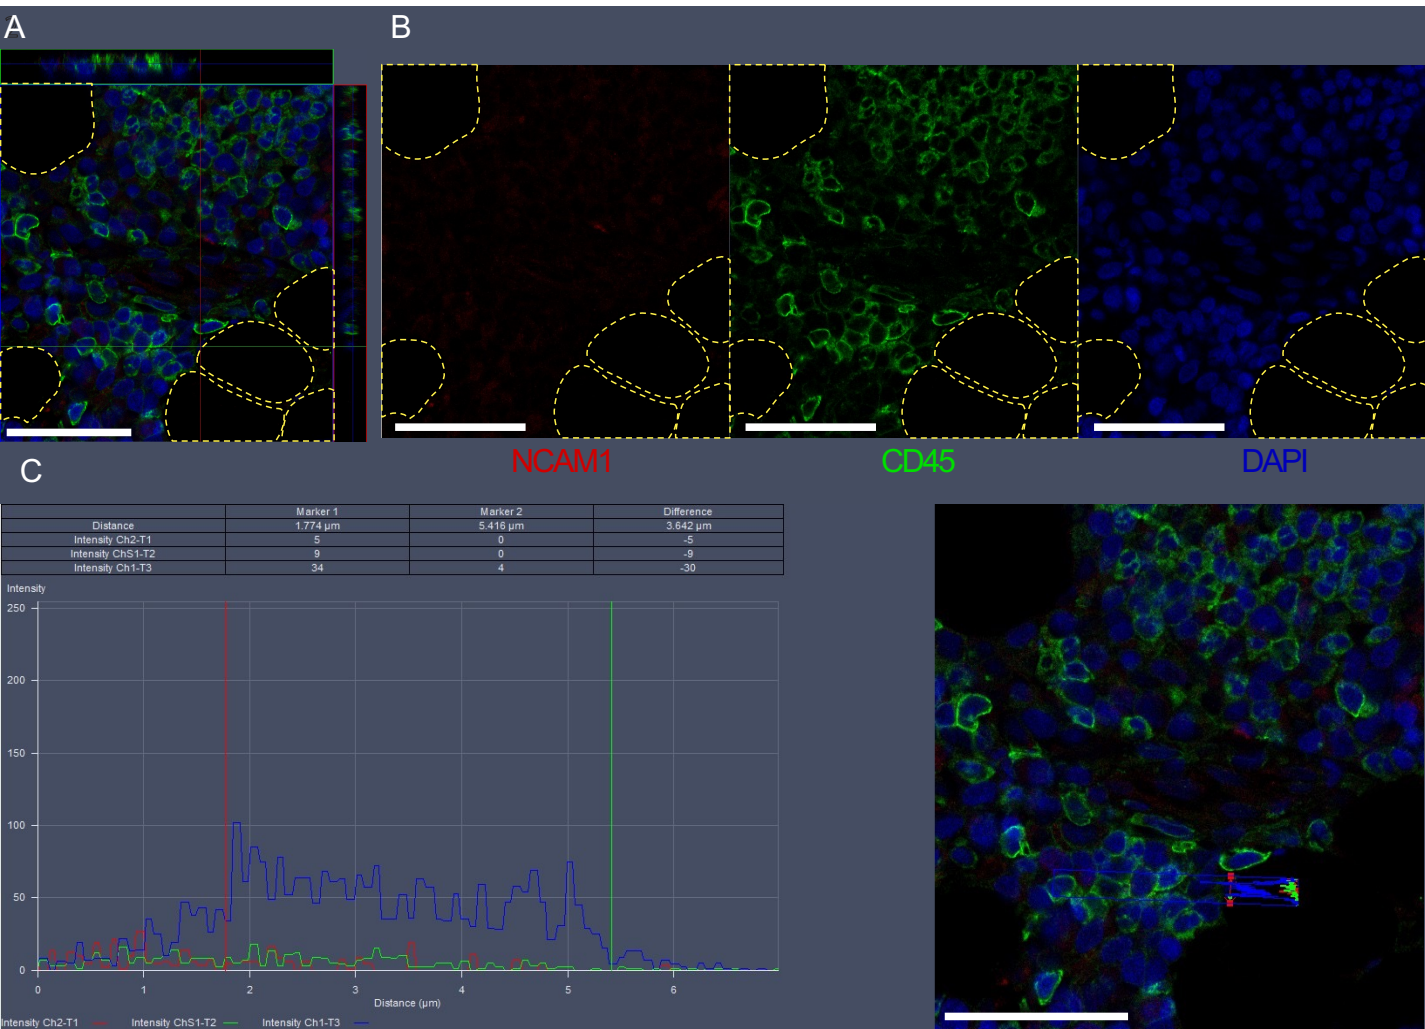

Supplement: supp [file elife-81656-supp-v1.zip › elife_poa_e81656_Figure_4_figure_supplement_3.pdf]

Figure 4-figure supplement 4

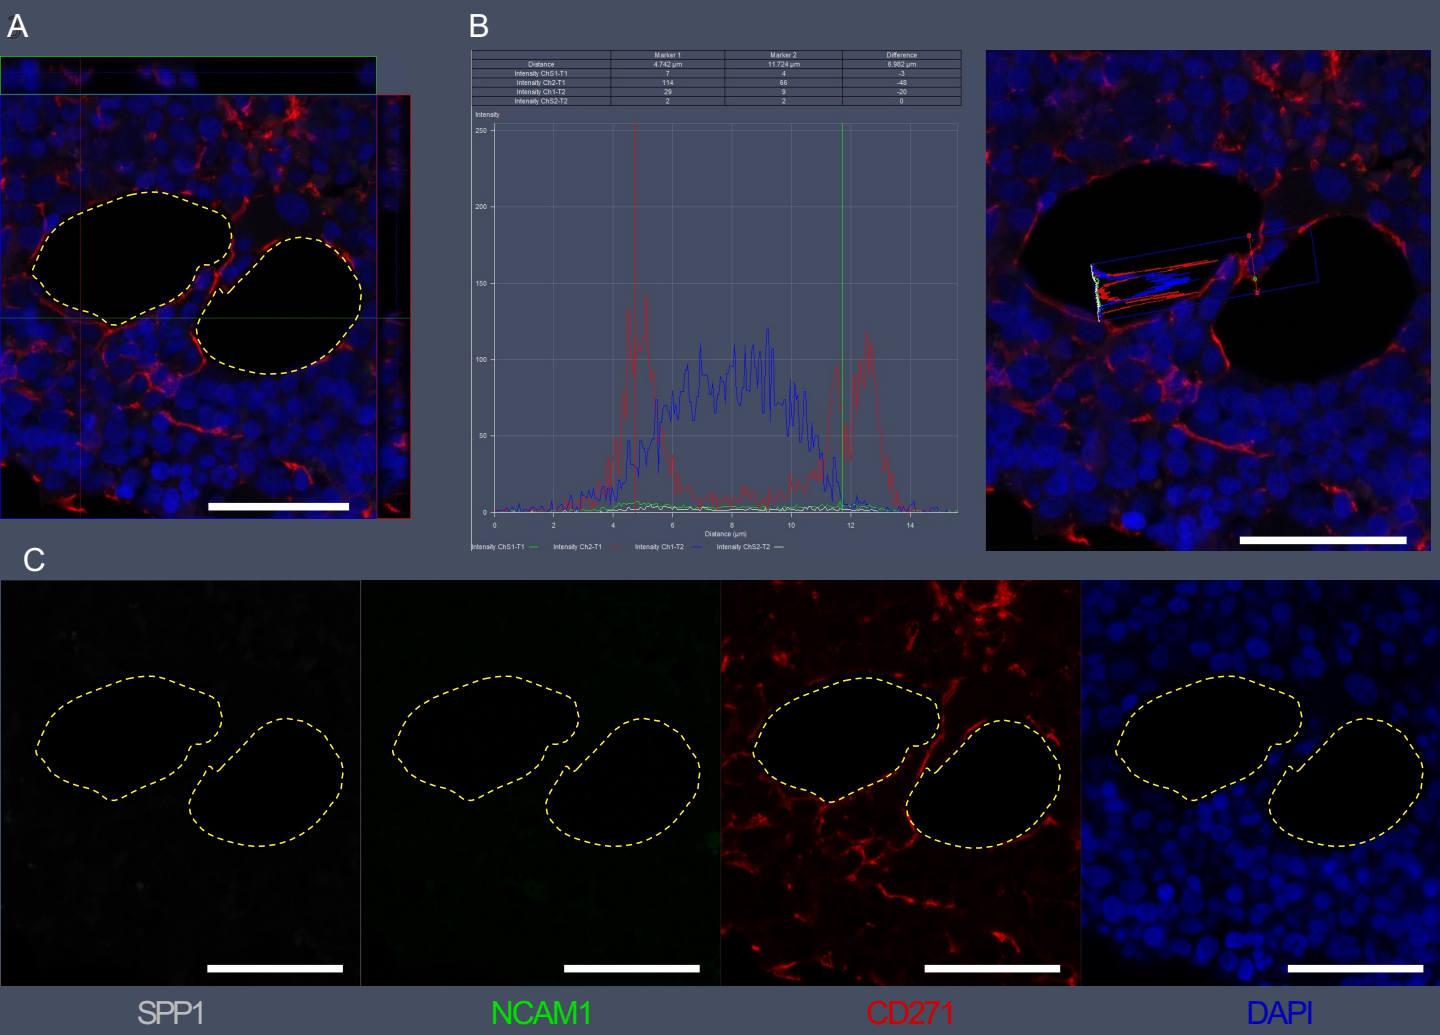

Supplement: supp [file elife-81656-supp-v1.zip › elife_poa_e81656_Figure_4_figure_supplement_4.pdf]

Figure 4-figure supplement 5

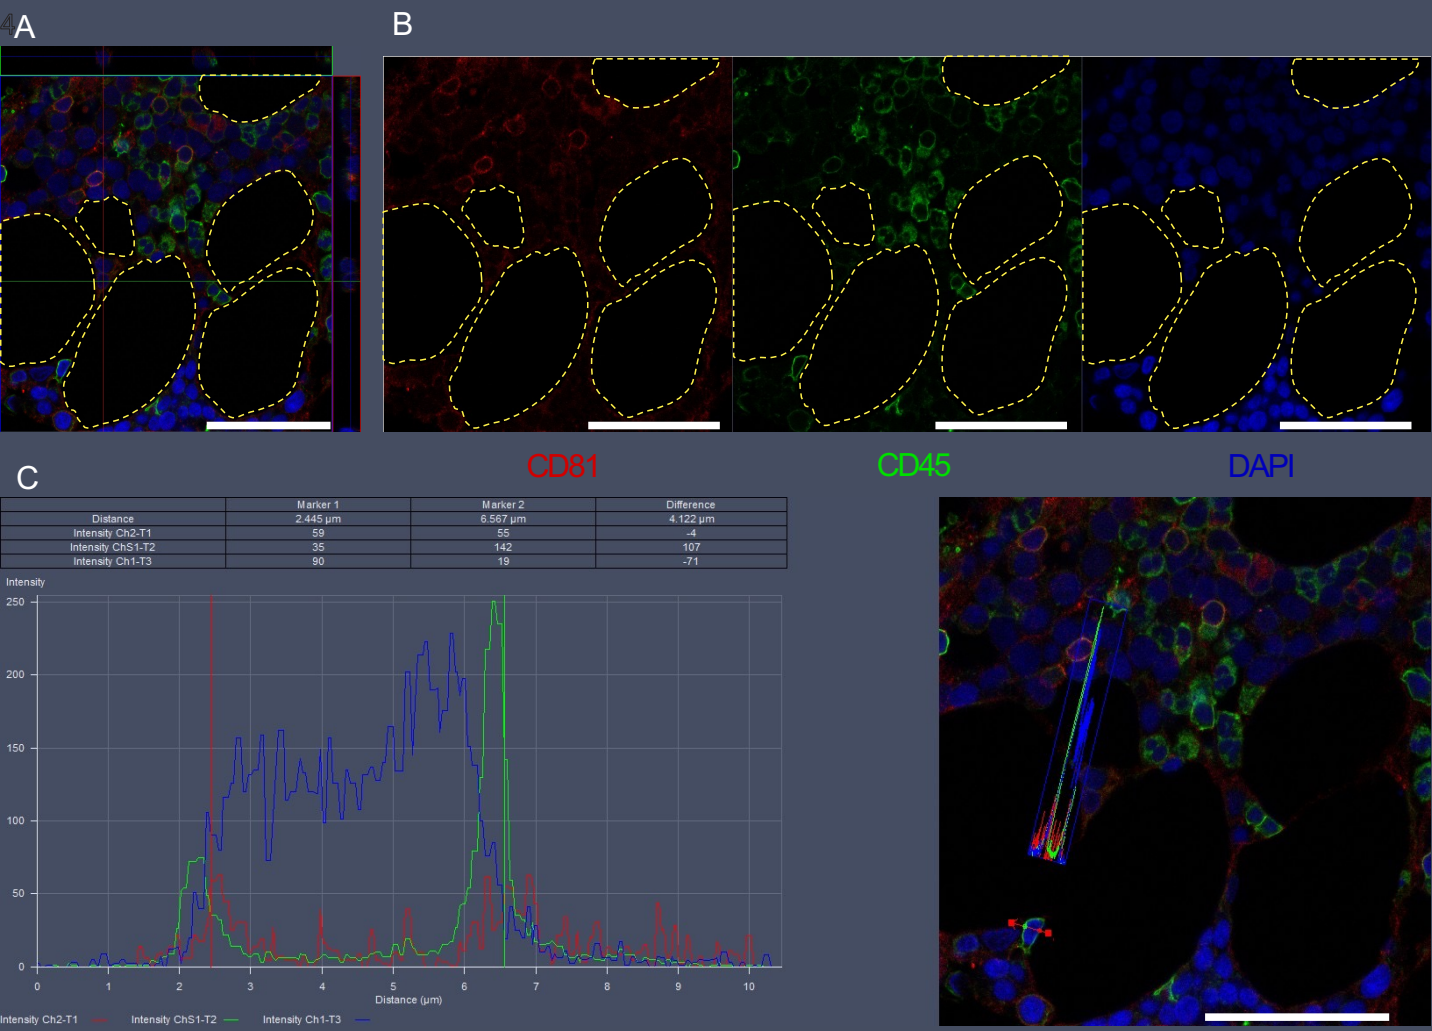

Supplement: supp [file elife-81656-supp-v1.zip › elife_poa_e81656_Figure_4_figure_supplement_5.pdf]

Figure 4-figure supplement 6

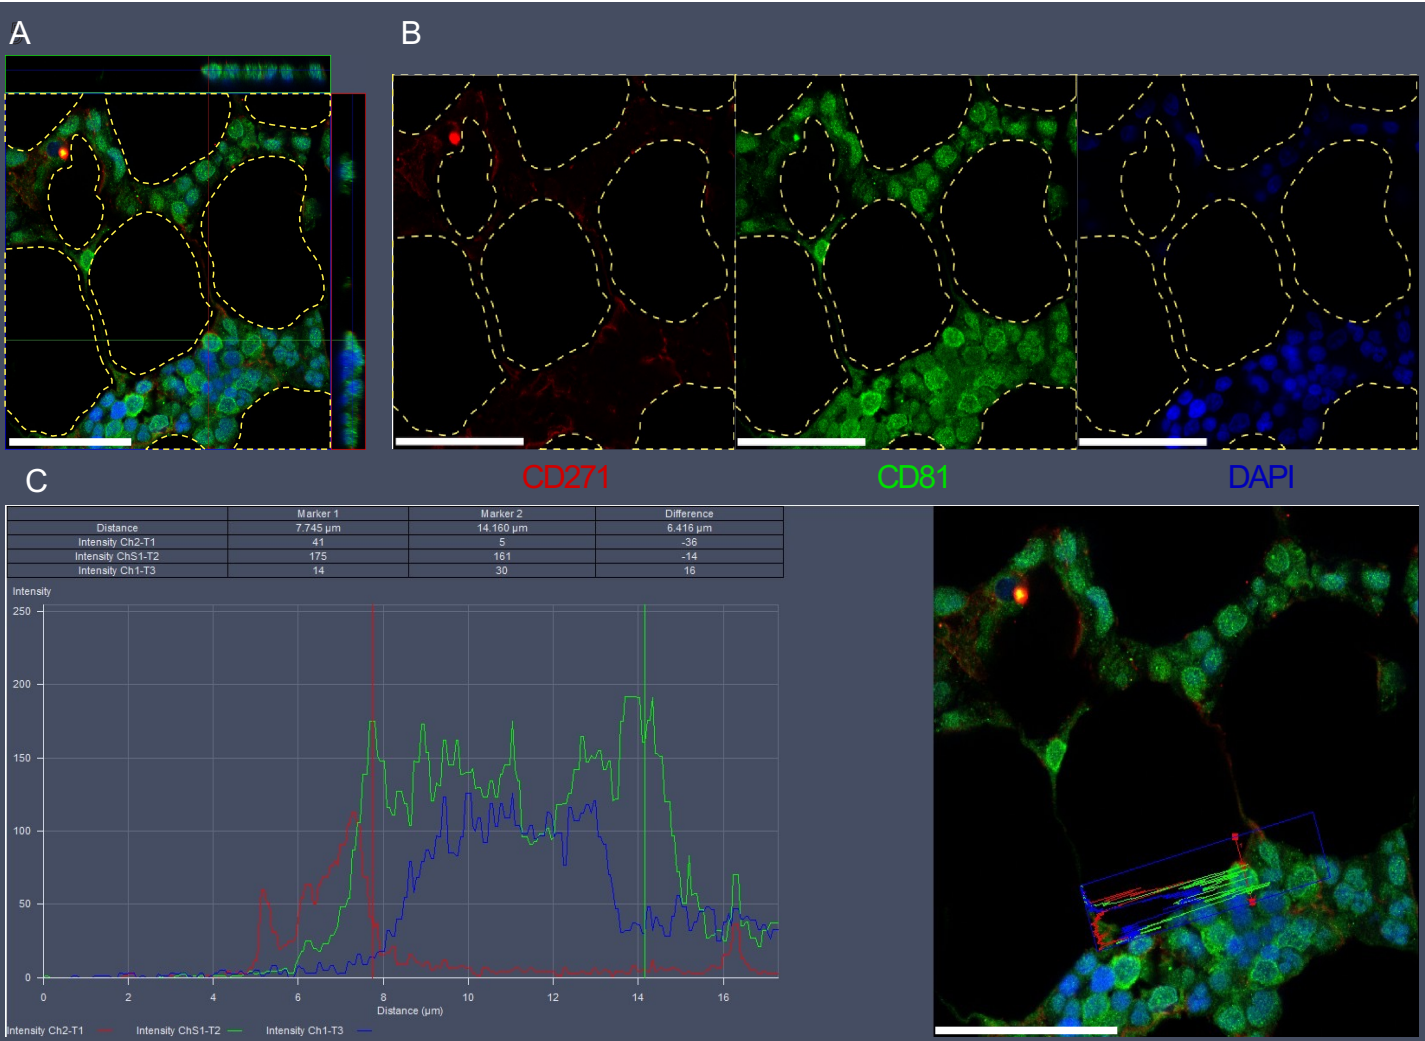

Supplement: supp [file elife-81656-supp-v1.zip › elife_poa_e81656_Figure_4_figure_supplement_6.pdf]

Figure 4-figure supplement 7

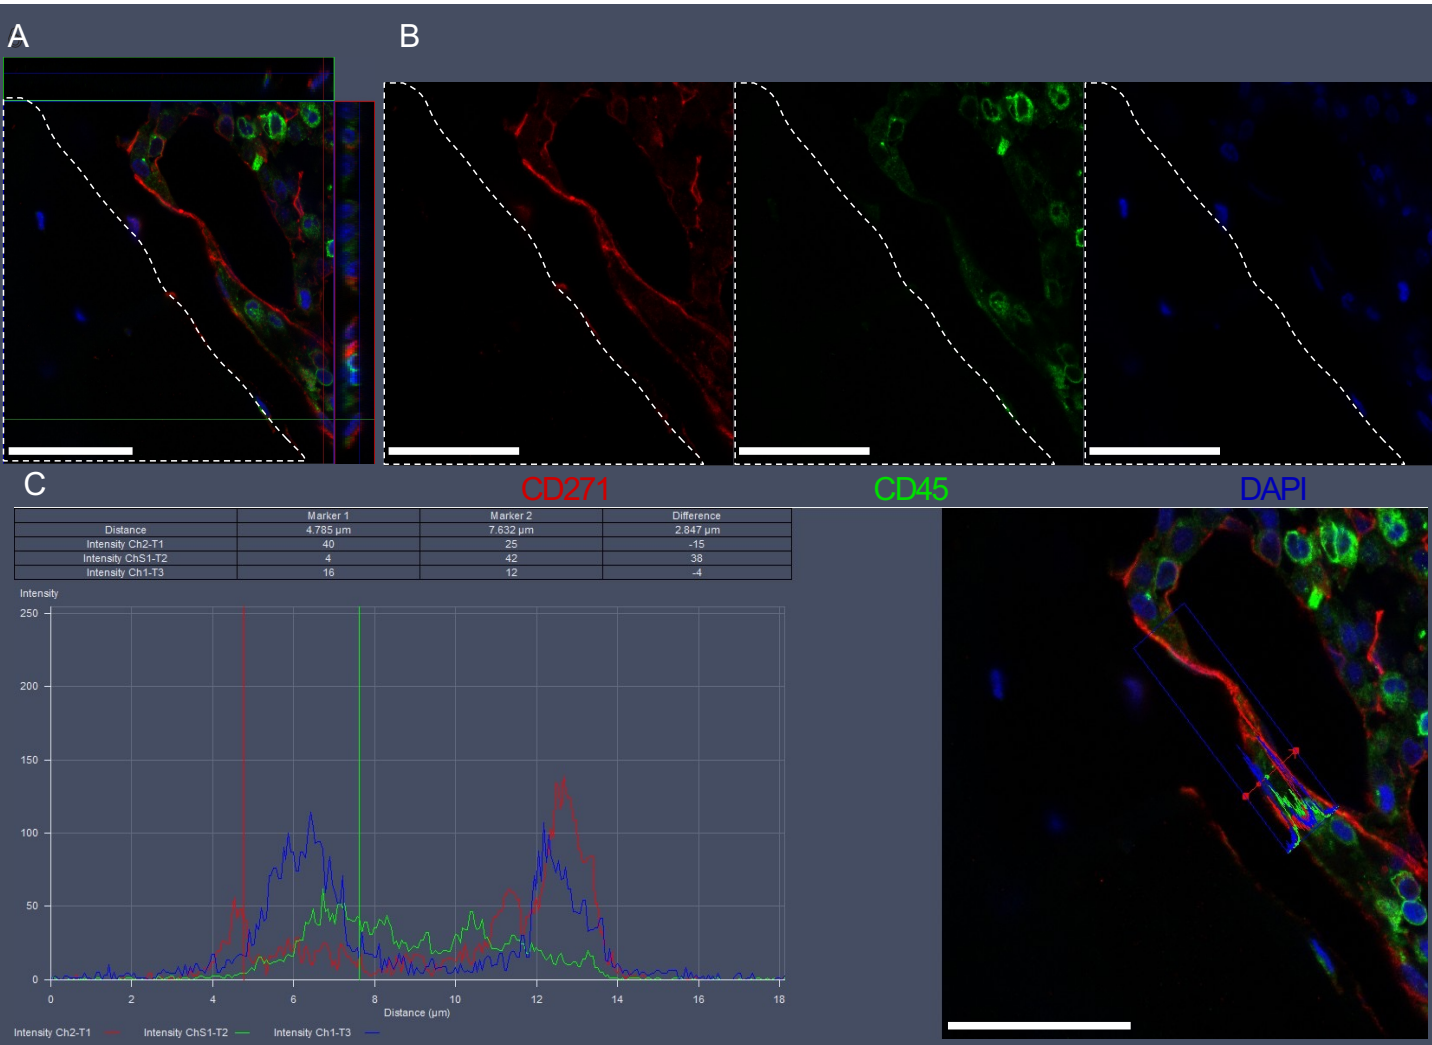

Supplement: supp [file elife-81656-supp-v1.zip › elife_poa_e81656_Figure_4_figure_supplement_7.pdf]

Figure 4-figure supplement 8

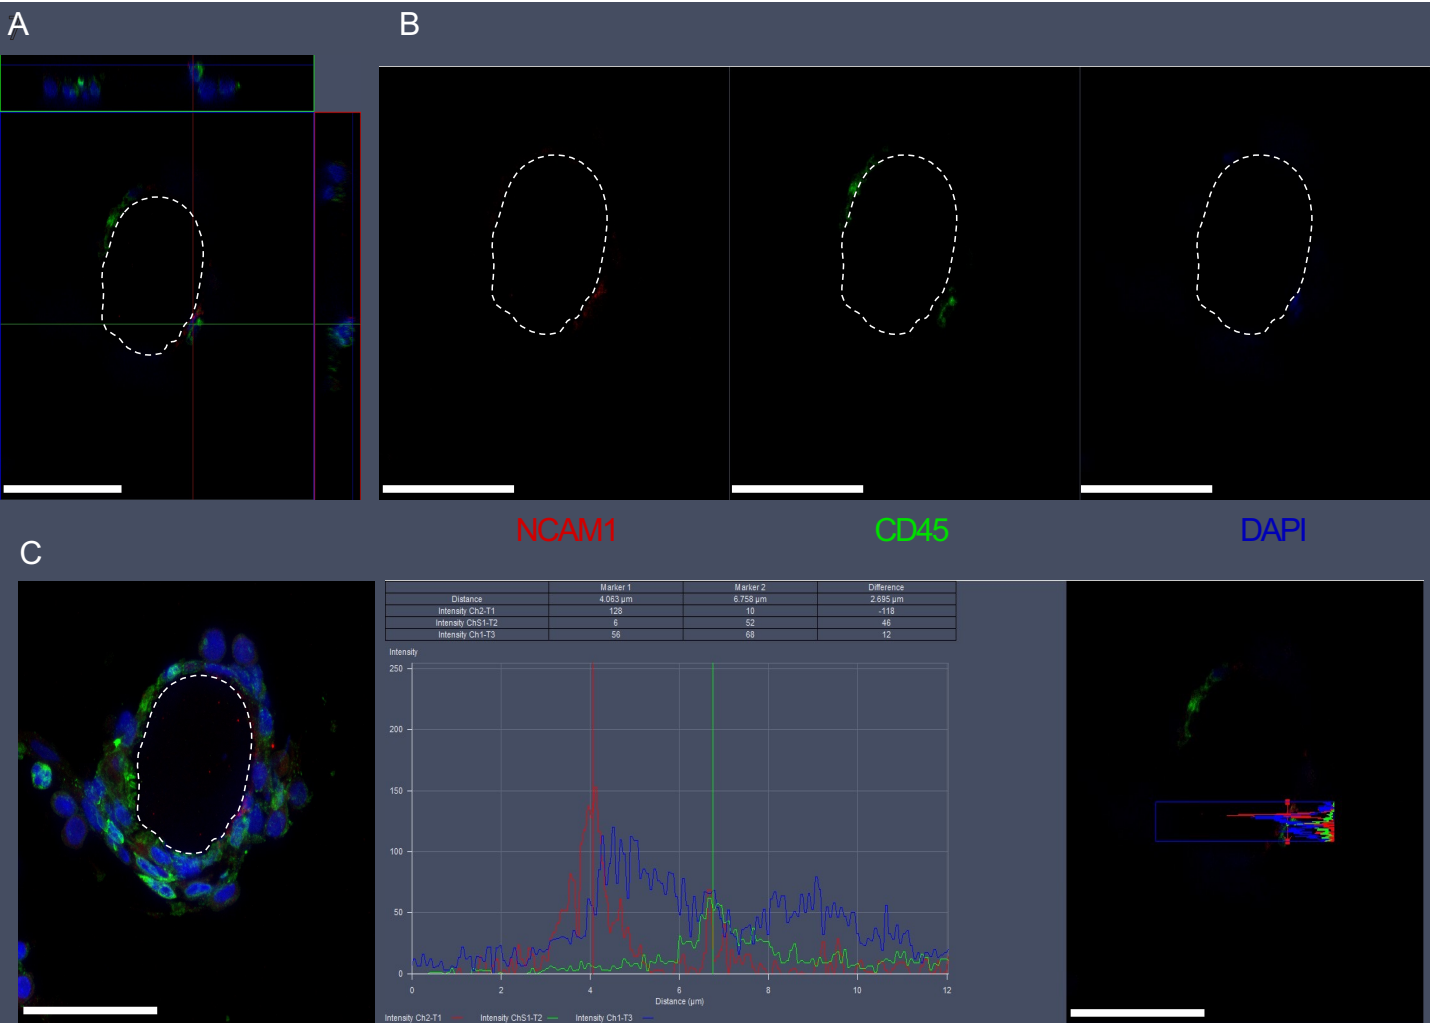

Supplement: supp [file elife-81656-supp-v1.zip › elife_poa_e81656_Figure_4_figure_supplement_8.pdf]

Figure 4-figure supplement 9

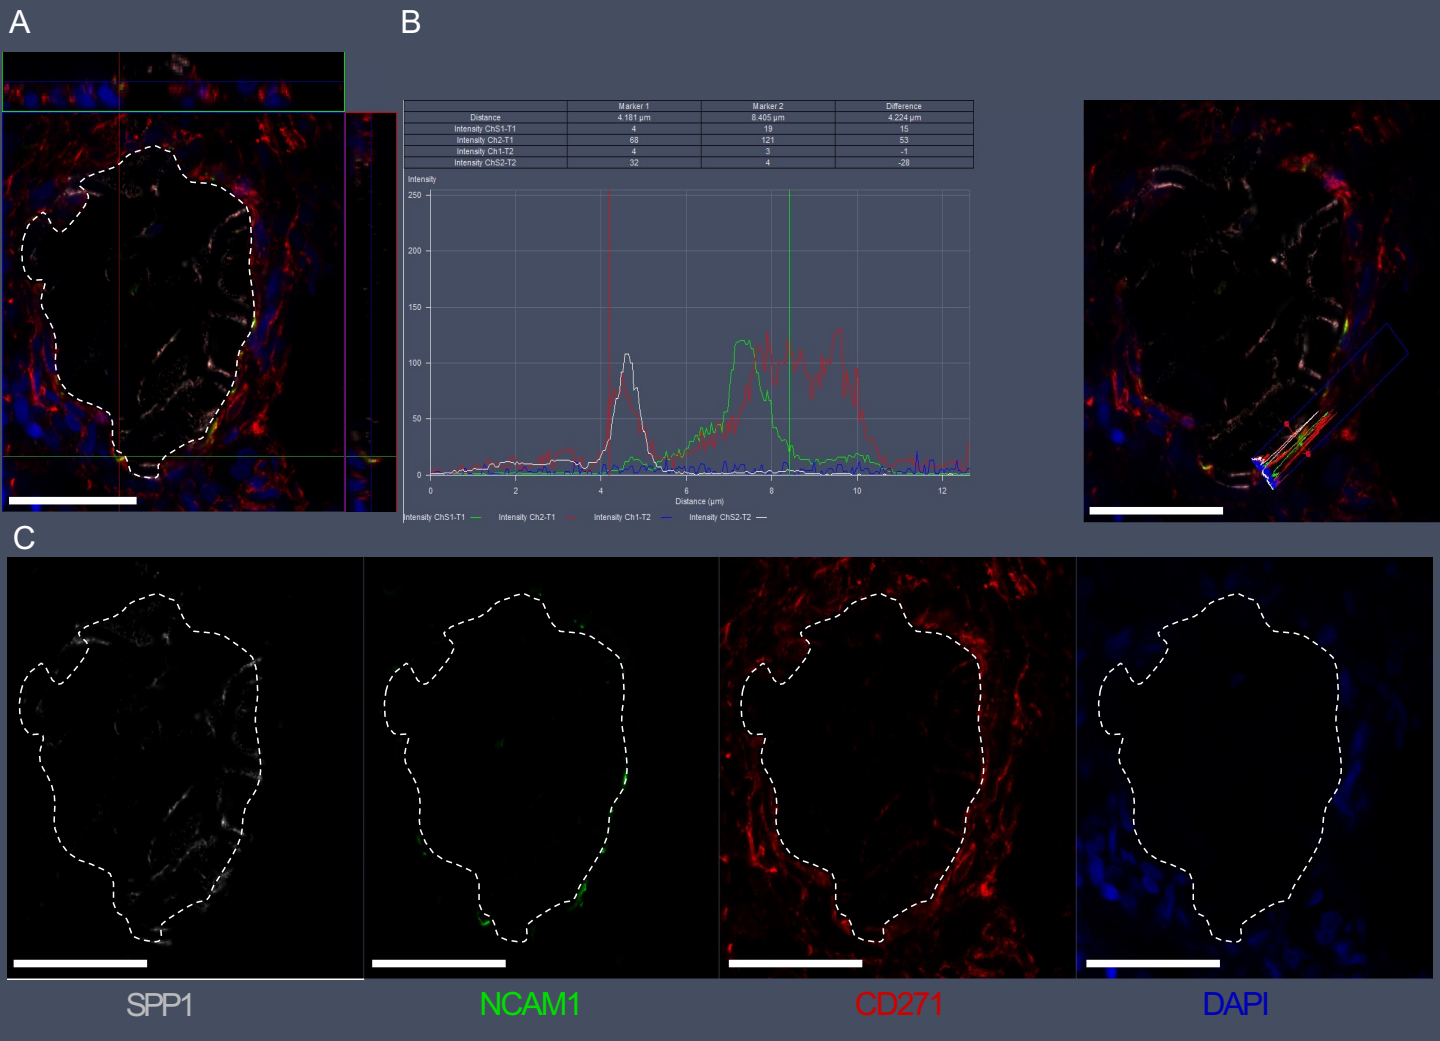

Supplement: supp [file elife-81656-supp-v1.zip › elife_poa_e81656_Figure_4_figure_supplement_9.pdf]

Figure 4-figure supplement 10

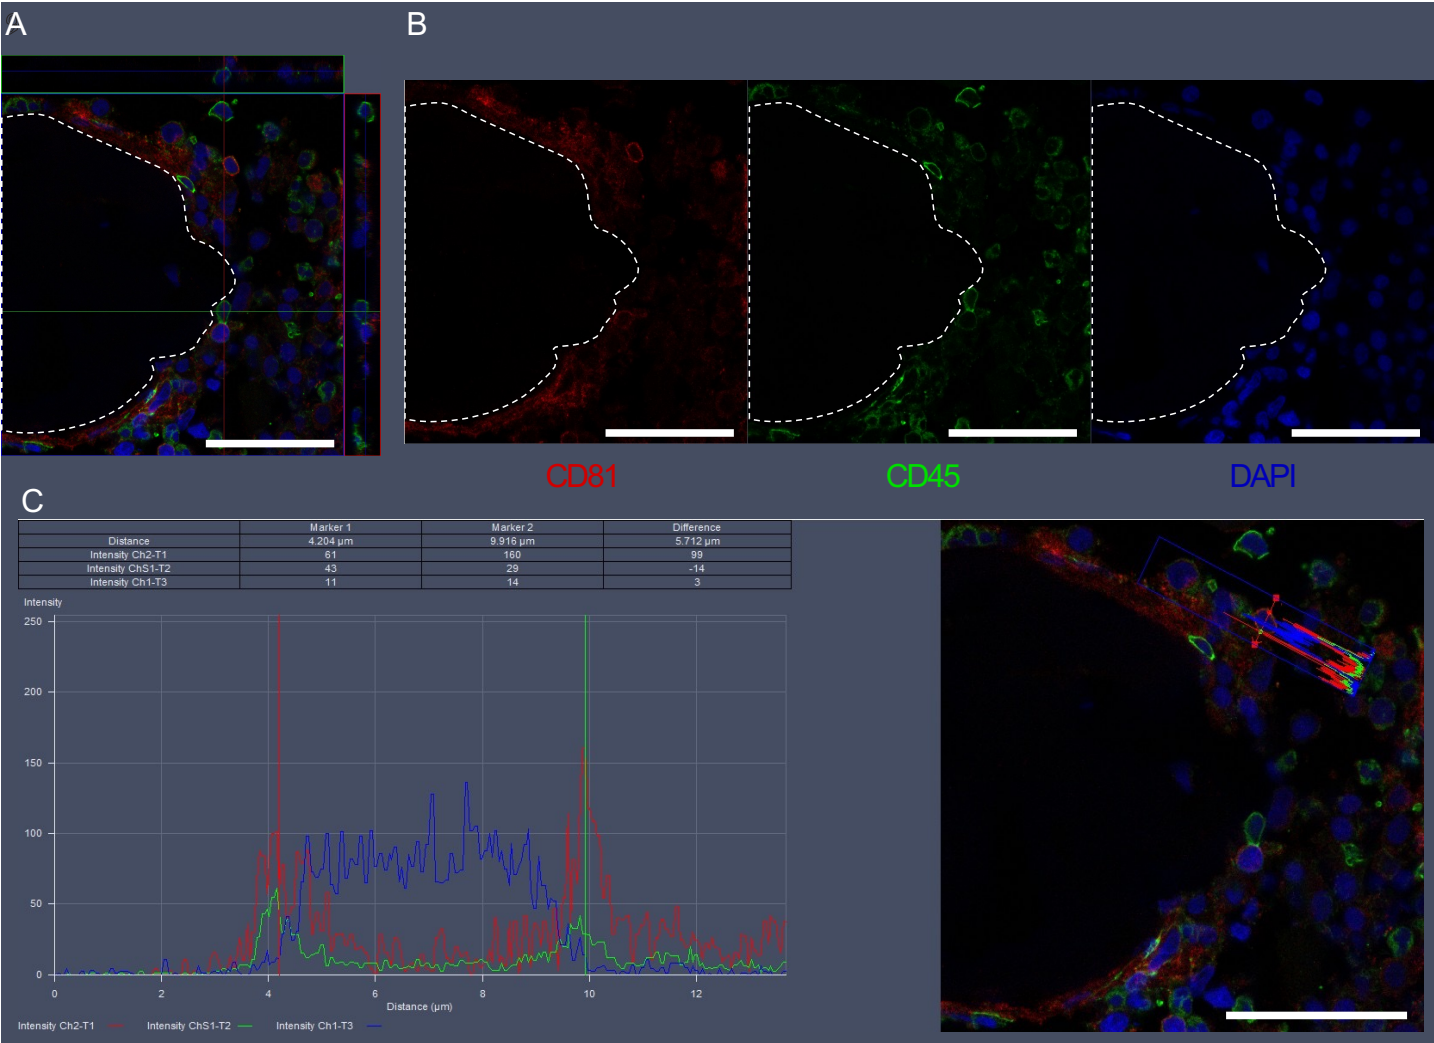

Supplement: supp [file elife-81656-supp-v1.zip › elife_poa_e81656_Figure_4_figure_supplement_10.pdf]

Figure 4-figure supplement 13

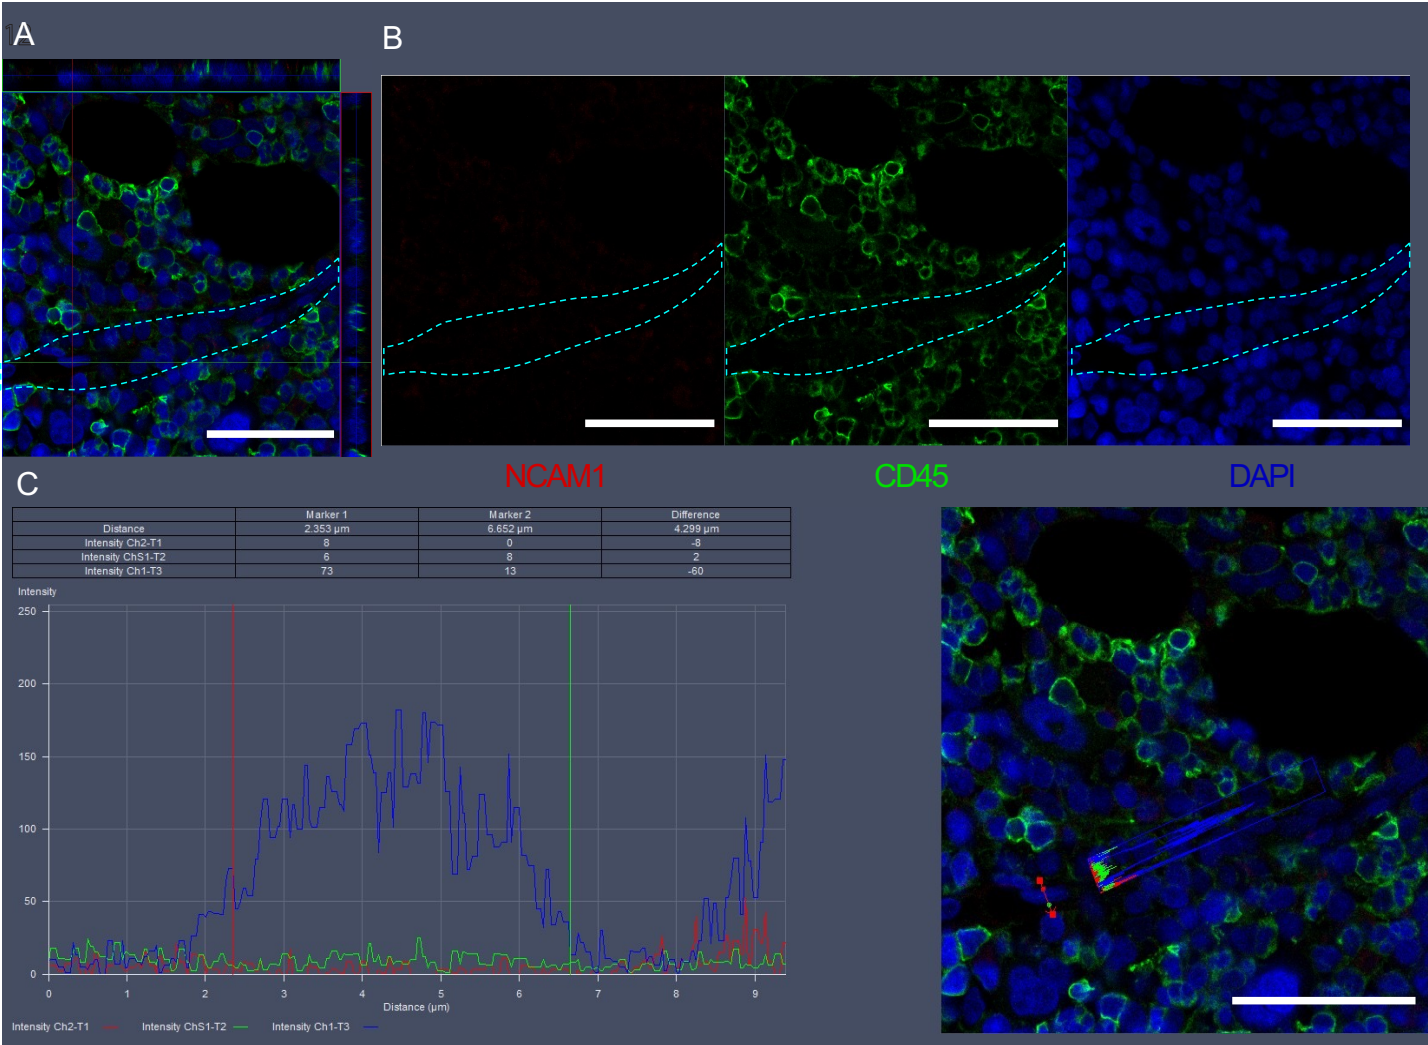

Supplement: supp [file elife-81656-supp-v1.zip › elife_poa_e81656_Figure_4_figure_supplement_3.pdf]

Figure 4-figure supplement 14

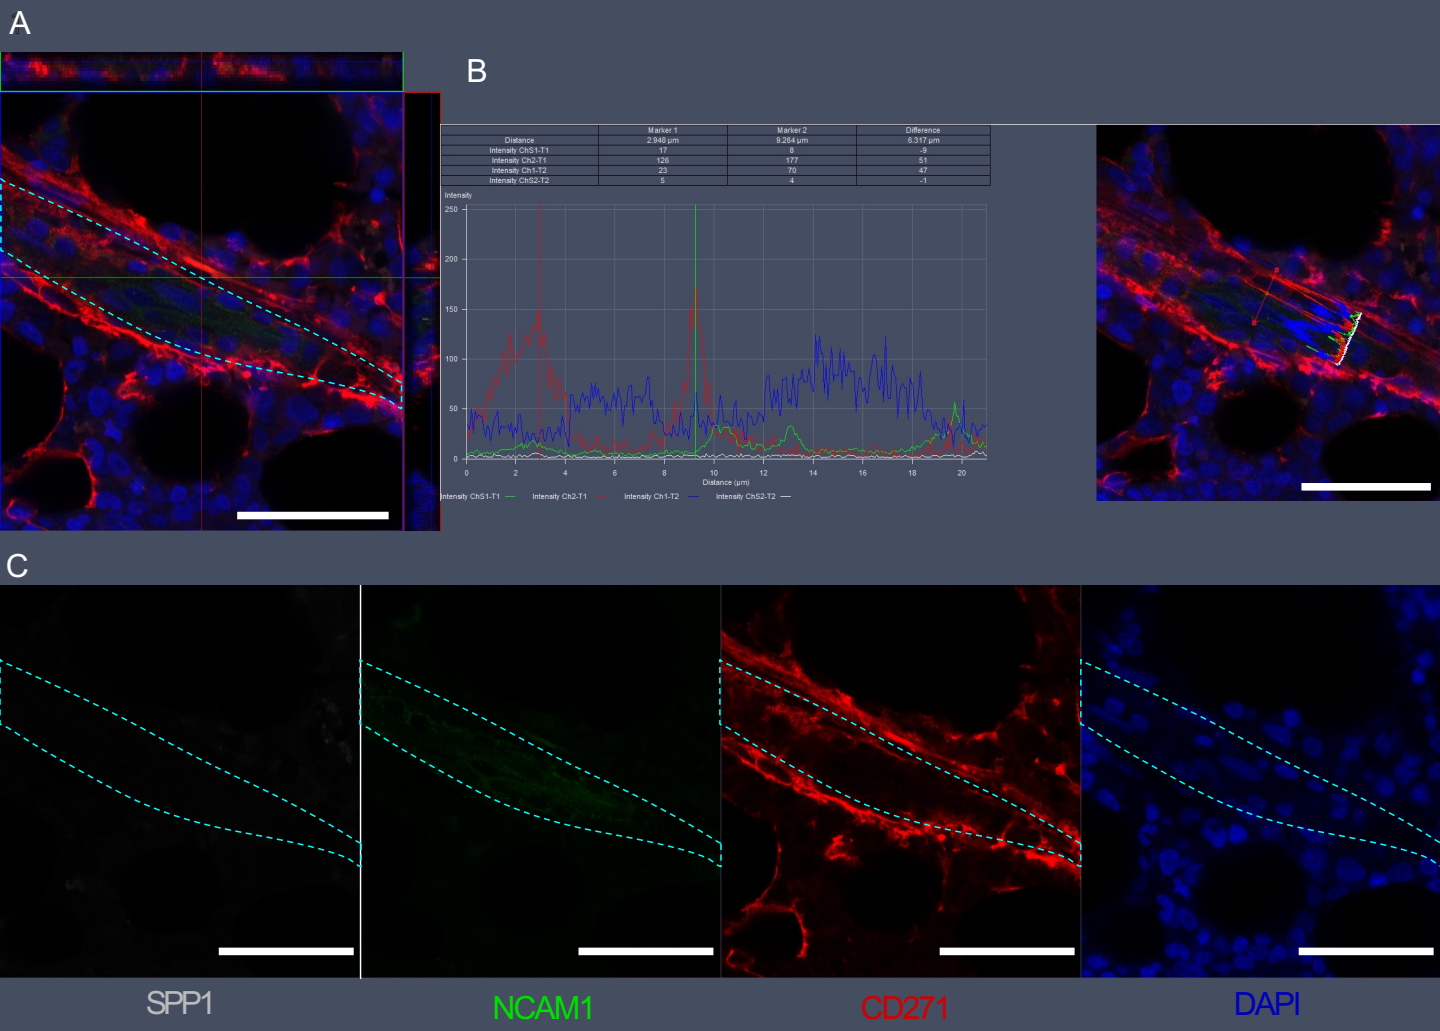

Supplement: supp [file elife-81656-supp-v1.zip › elife_poa_e81656_Figure_4_figure_supplement_14.pdf]

Figure 4-figure supplement 15

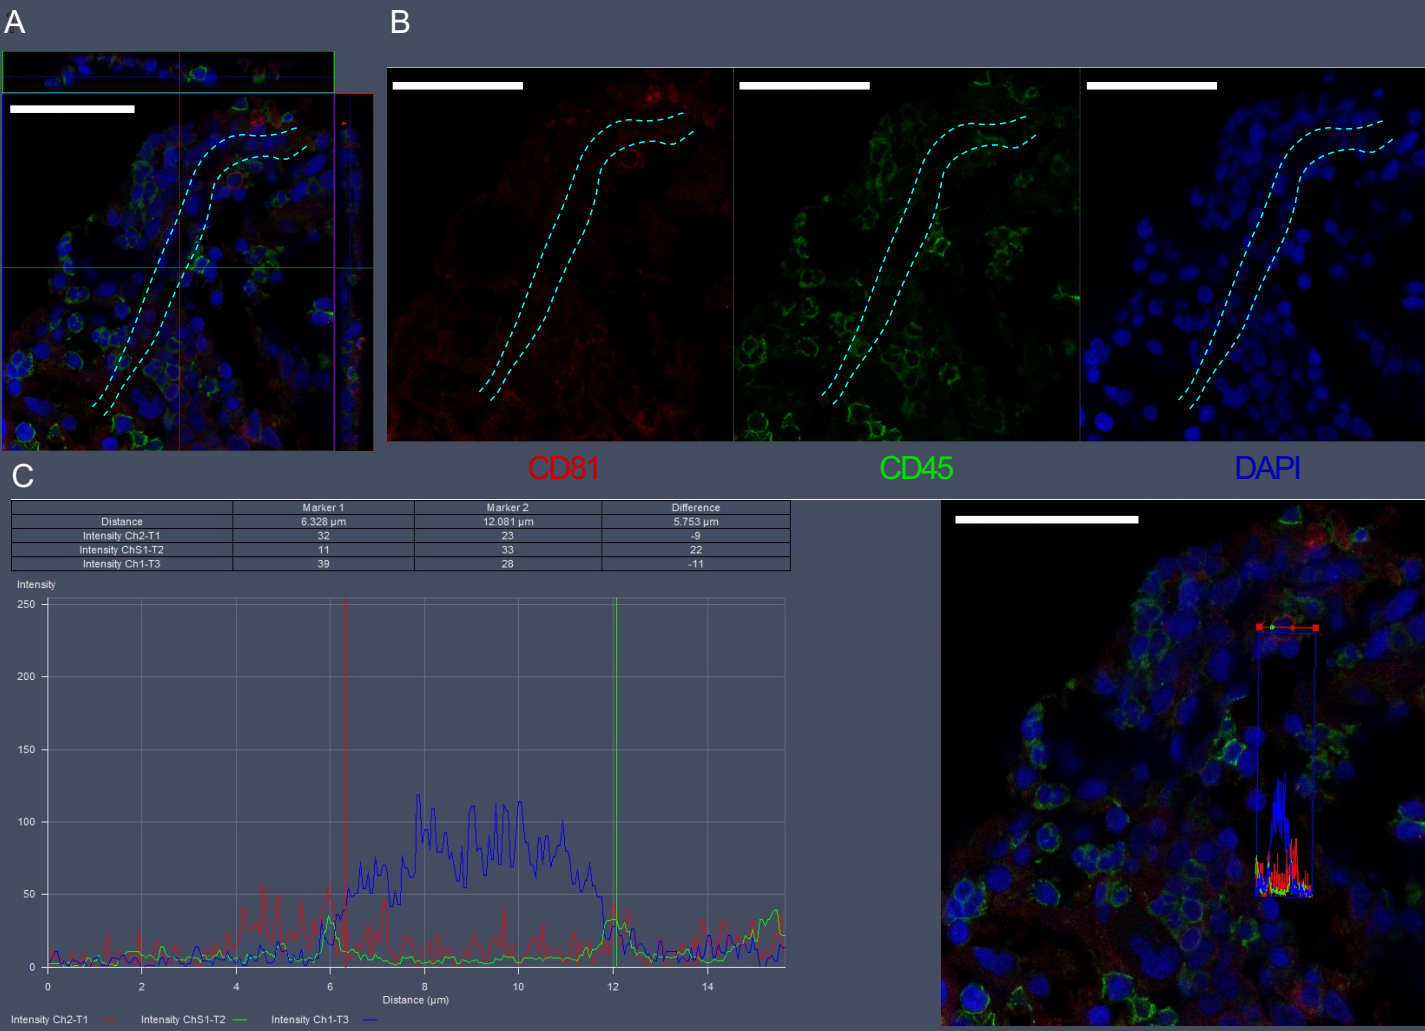

Supplement: supp [file elife-81656-supp-v1.zip › elife_poa_e81656_Figure_4_figure_supplement_15.pdf]

Figure 4-figure supplement 16

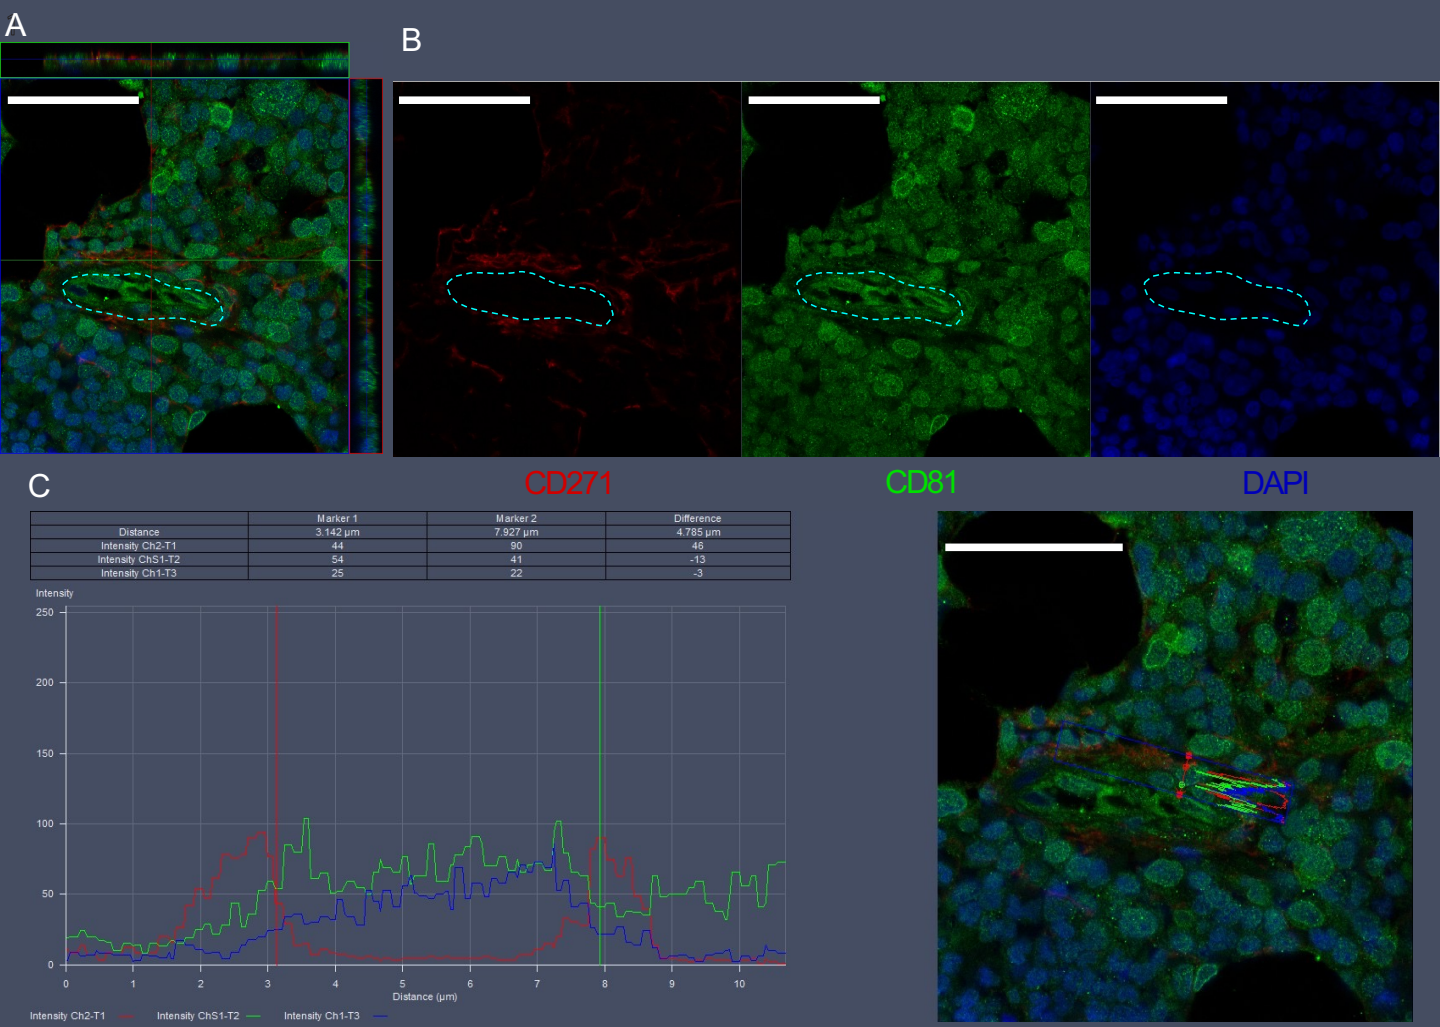

Supplement: supp [file elife-81656-supp-v1.zip › elife_poa_e81656_Figure_4_figure_supplement_16.pdf]

Figure 5-figure supplement 1

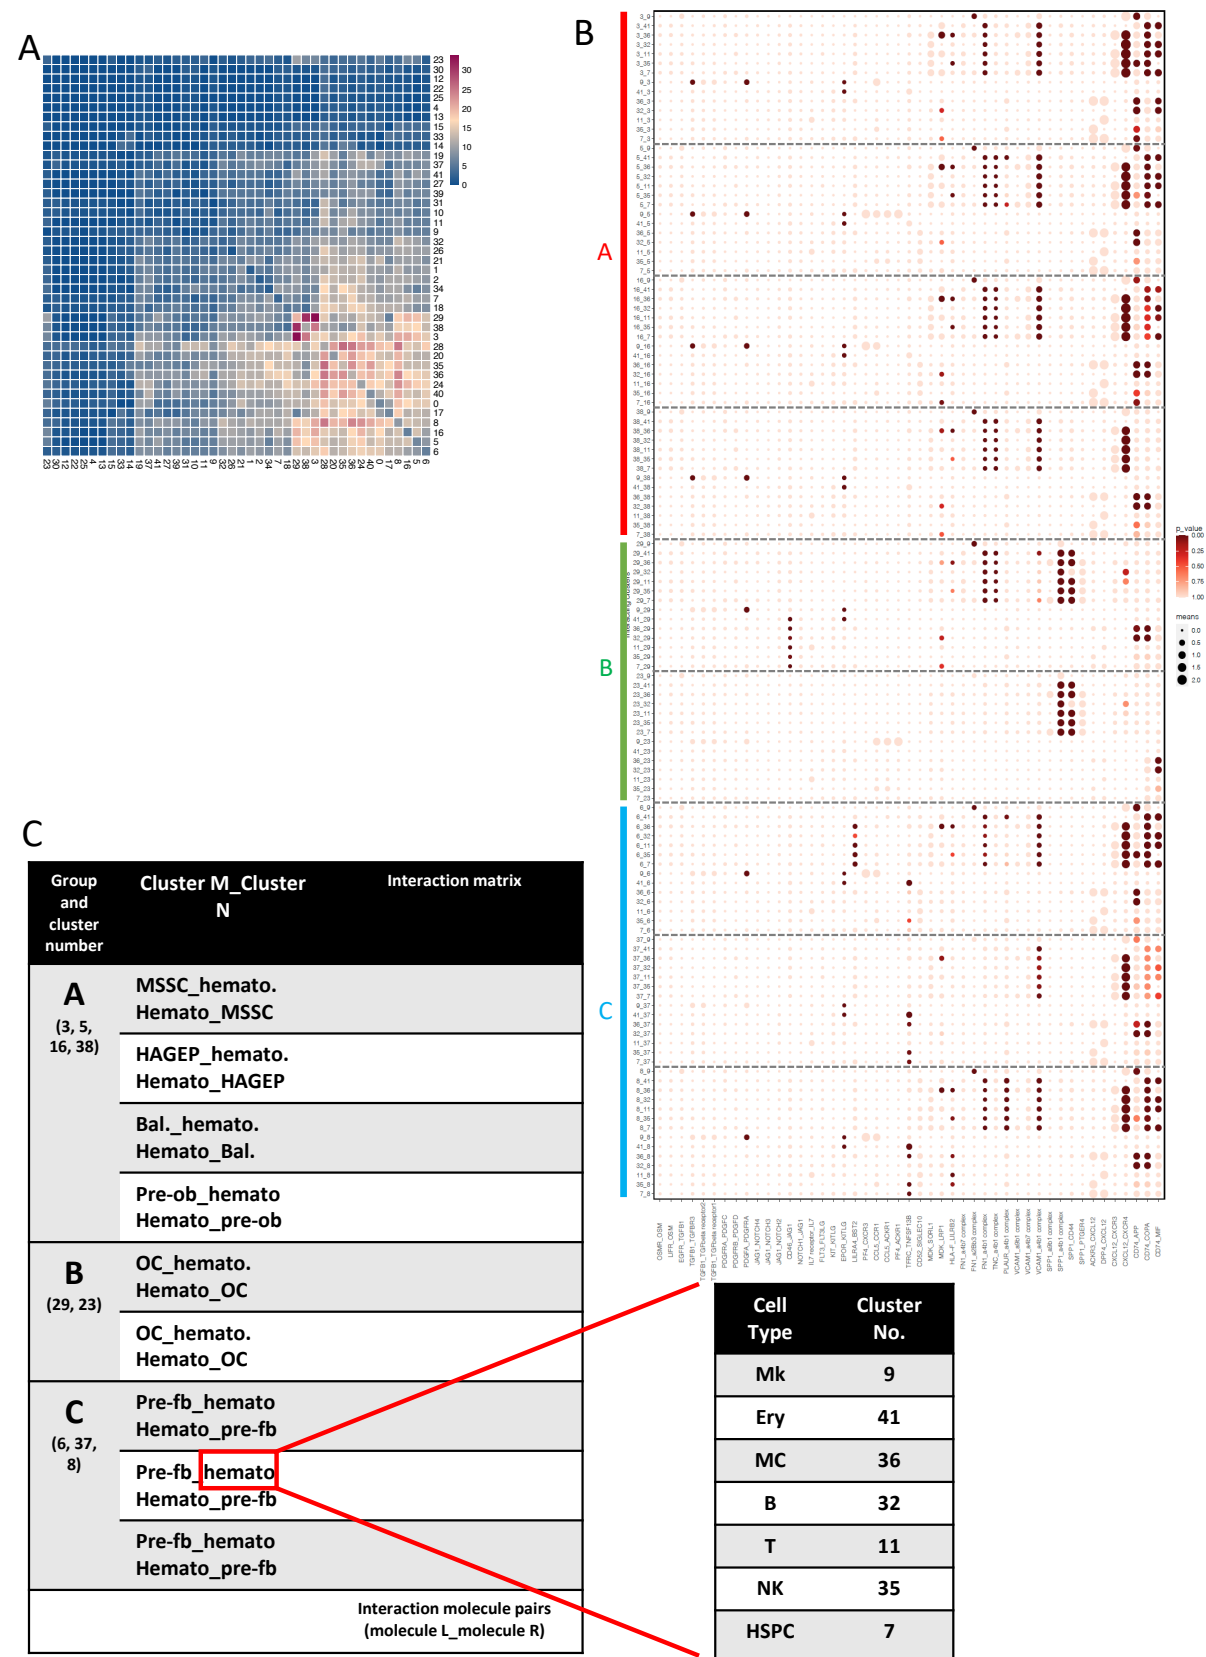

Supplement: supp [file elife-81656-supp-v1.zip › elife_poa_e81656_Figure_5_figure_supplement_1.pdf]

Figure 5-figure supplement 2

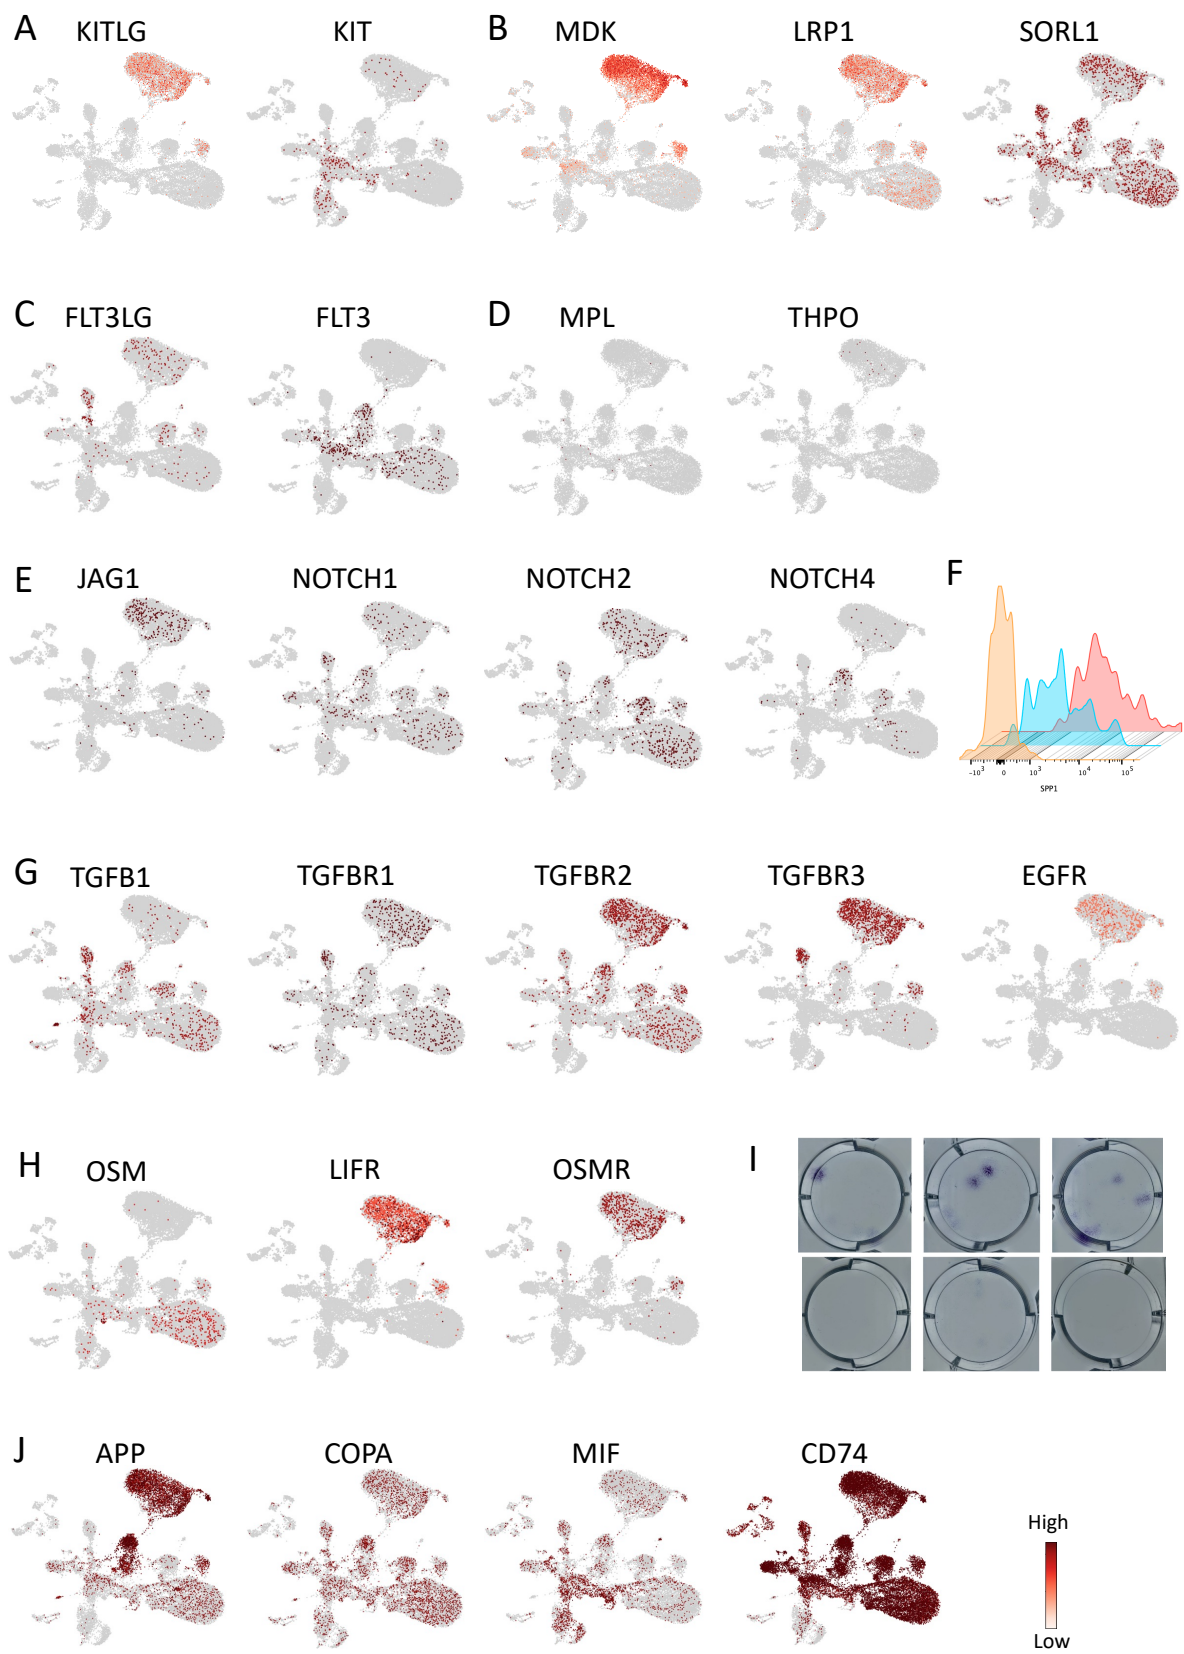

Supplement: supp [file elife-81656-supp-v1.zip › elife_poa_e81656_Figure_5_figure_supplement_2.pdf]

Figure 5-figure supplement 3

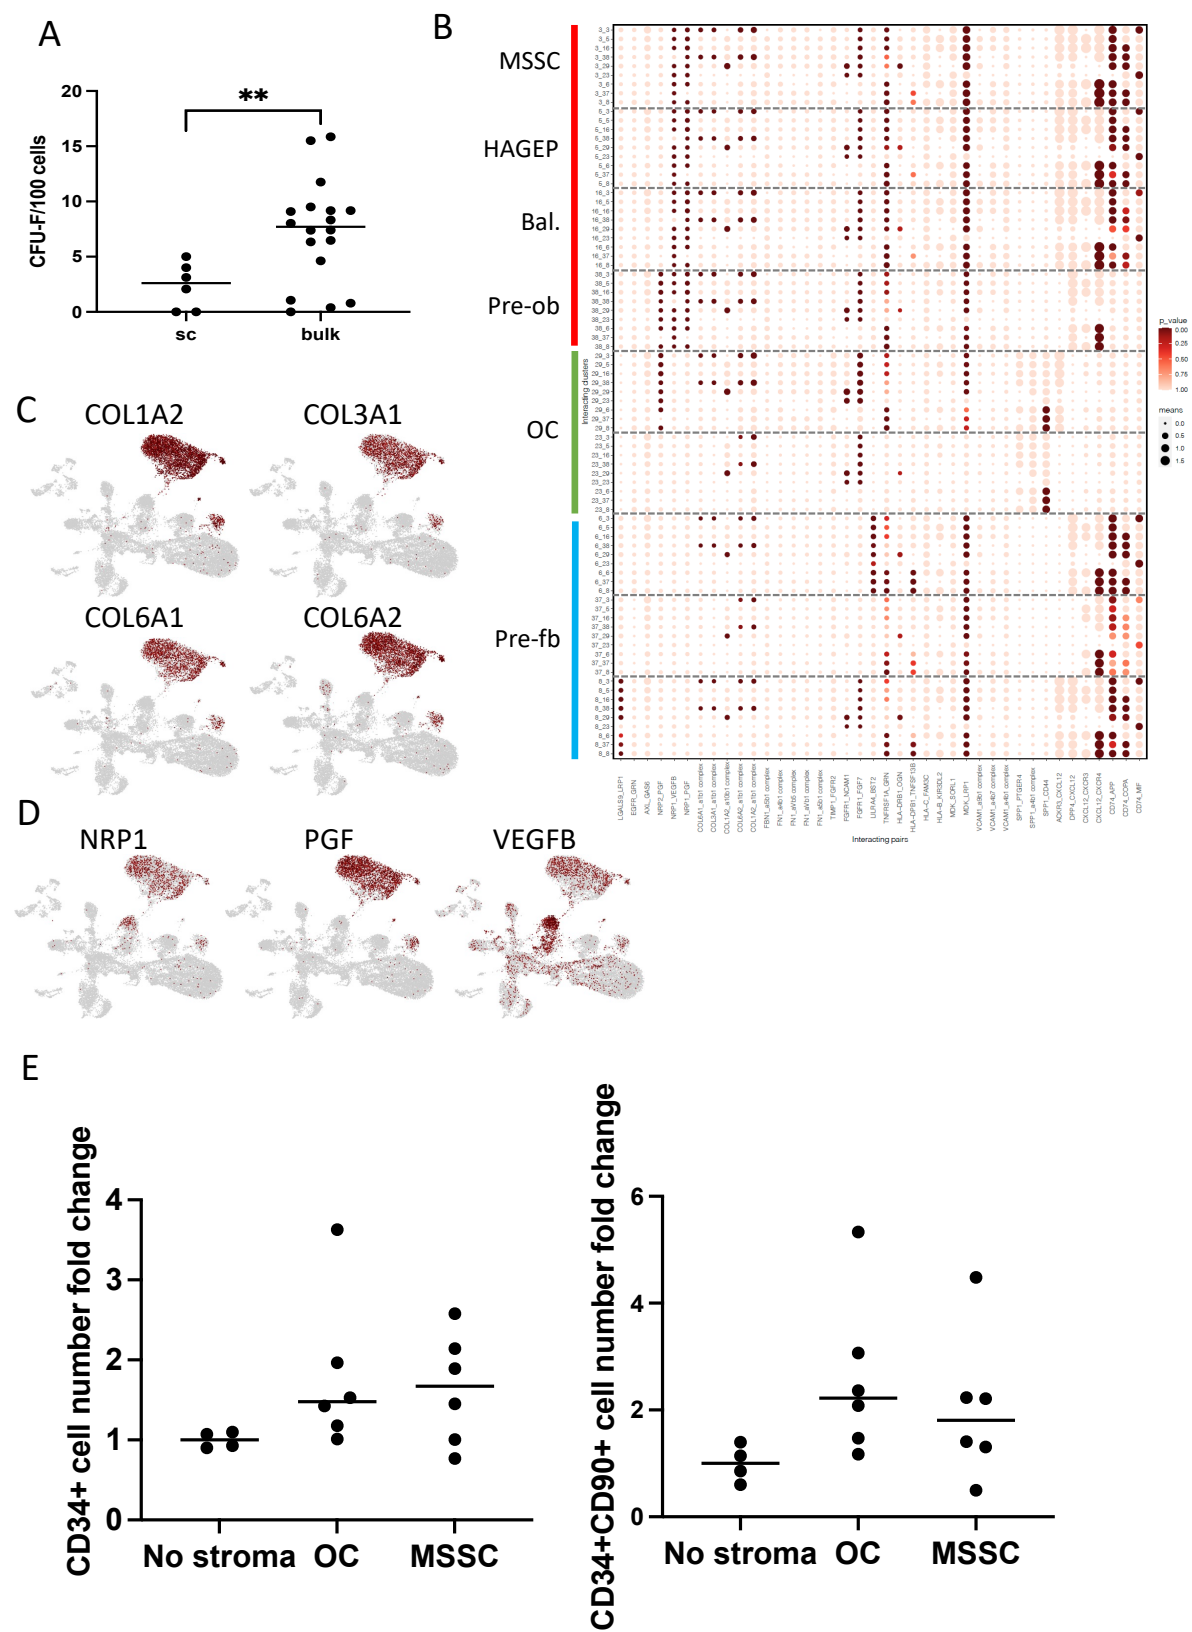

Supplement: supp [file elife-81656-supp-v1.zip › elife_poa_e81656_Figure_5_figure_supplement_3.pdf]
